# Supplementary material for: The Tuberculosis Sentinel Research Network (TB-SRN) of the International epidemiology Databases to Evaluate AIDS (IeDEA): protocol for a prospective cohort study in Africa, Southeast Asia and Latin America
Source: PubMed Central journal article supplement — BMJ Open. 2024 Jan 9;14(1):e079138. doi: 10.1136/bmjopen-2023-079138 (PMC10806577; doi:10.1136/bmjopen-2023-079138), 2024-01-09
Supplement: bmjopen-2023-079138.draft_revisions.pdf [file bmjopen-2023-079138.draft_revisions.pdf]

# BMJ Open

BMJ Open is committed to open peer review. As part of this commitment we make the peer review history of every article we publish publicly available.

When an article is published we post the peer reviewers' comments and the authors' responses online. We also post the versions of the paper that were used during peer review. These are the versions that the peer review comments apply to.

The versions of the paper that follow are the versions that were submitted during the peer review process. They are not the versions of record or the final published versions. They should not be cited or distributed as the published version of this manuscript.

BMJ Open is an open access journal and the full, final, typeset and author-corrected version of record of the manuscript is available on our site with no access controls, subscription charges or pay-per-view fees (<http://bmjopen.bmj.com>).

If you have any questions on BMJ Open's open peer review process please email [info.bmjopen@bmj.com](mailto:info.bmjopen@bmj.com)

# BMJ Open

## The global Tuberculosis Sentinel Research Network (TB-SRN) of the International epidemiology Databases to Evaluate AIDS (IeDEA): protocol for a prospective multiregional cohort study

|                               |                                                                                                                                                                                                                                                                                                                                                                                                                                                                                                                                                                                                                                                                                                                                                                                                                                                                                                                                                                                                                                                                                                                                                                                                                                                                                                                                                                                                                                                                                                                                                                                                                                                                                                                                                                                                                                                                                                                                                                                    |
|-------------------------------|------------------------------------------------------------------------------------------------------------------------------------------------------------------------------------------------------------------------------------------------------------------------------------------------------------------------------------------------------------------------------------------------------------------------------------------------------------------------------------------------------------------------------------------------------------------------------------------------------------------------------------------------------------------------------------------------------------------------------------------------------------------------------------------------------------------------------------------------------------------------------------------------------------------------------------------------------------------------------------------------------------------------------------------------------------------------------------------------------------------------------------------------------------------------------------------------------------------------------------------------------------------------------------------------------------------------------------------------------------------------------------------------------------------------------------------------------------------------------------------------------------------------------------------------------------------------------------------------------------------------------------------------------------------------------------------------------------------------------------------------------------------------------------------------------------------------------------------------------------------------------------------------------------------------------------------------------------------------------------|
| Journal:                      | <i>BMJ Open</i>                                                                                                                                                                                                                                                                                                                                                                                                                                                                                                                                                                                                                                                                                                                                                                                                                                                                                                                                                                                                                                                                                                                                                                                                                                                                                                                                                                                                                                                                                                                                                                                                                                                                                                                                                                                                                                                                                                                                                                    |
| Manuscript ID                 | bmjopen-2023-079138                                                                                                                                                                                                                                                                                                                                                                                                                                                                                                                                                                                                                                                                                                                                                                                                                                                                                                                                                                                                                                                                                                                                                                                                                                                                                                                                                                                                                                                                                                                                                                                                                                                                                                                                                                                                                                                                                                                                                                |
| Article Type:                 | Protocol                                                                                                                                                                                                                                                                                                                                                                                                                                                                                                                                                                                                                                                                                                                                                                                                                                                                                                                                                                                                                                                                                                                                                                                                                                                                                                                                                                                                                                                                                                                                                                                                                                                                                                                                                                                                                                                                                                                                                                           |
| Date Submitted by the Author: | 23-Aug-2023                                                                                                                                                                                                                                                                                                                                                                                                                                                                                                                                                                                                                                                                                                                                                                                                                                                                                                                                                                                                                                                                                                                                                                                                                                                                                                                                                                                                                                                                                                                                                                                                                                                                                                                                                                                                                                                                                                                                                                        |
| Complete List of Authors:     | <p>Enane, Leslie; Indiana University School of Medicine, Department of Pediatrics; Indiana University Center for Global Health Equity<br/> Duda, Stephany N.; Vanderbilt University School of Medicine, Department of Biomedical Informatics<br/> Chanyachukul, Thida; TREAT Asia/amfAR – The Foundation for AIDS Research<br/> Bolton-Moore, Carolyn; The University of Alabama System, Navuluri, Neelima; Duke University School of Medicine, Department of Medicine<br/> Messou, Eugène; CePreF, ACONDA, Abidjan<br/> Mbonze, Nana; Université Protestante du Congo<br/> McDade, LaQuita R.; Vanderbilt University Medical Center<br/> Figueiredo, Marina Cruvinel; Vanderbilt University School of Medicine<br/> Ross, J; –The Foundation for AIDS Research<br/> Evans, Denise; Faculty of Health Sciences University of the Witwatersrand<br/> Diero, Lameck; Moi University College of Health Sciences, Department of Medicine<br/> Akpata, Robert; Université de Bordeaux<br/> Zotova, Natalia; Albert Einstein College of Medicine, Department of Medicine<br/> Freeman, Aimee; Johns Hopkins Bloomberg School of Public Health<br/> Pierre, Marie Flore; Haitian Group for the Study of Kaposi's Sarcoma and Opportunistic Infections<br/> Rupasinghe, Dhanushi; UNSW<br/> Ballif, Marie; University of Bern; University of Bern, Department of Infectious Diseases<br/> Byakwaga, Helen; Mbarara University of Science and Technology Faculty of Medicine, Community Health<br/> de Castro, Nathalie; Université de Bordeaux<br/> Tabala, Martine; Université de Kishasa<br/> Sterling, Timothy; Vanderbilt University Medical Center<br/> Sohn, Annette; TREAT Asia<br/> Fenner, Lukas; University of Bern<br/> Wools-Kaloustian, Kara; Indiana University School of Medicine<br/> Poda, Armel; Centre Hospitalier Universitaire Sourô Sanou<br/> Yotebeing, Marcel ; Einstein/Montefiore Department of Medicine<br/> Huebner, Robin; National Institutes of Health</p> |

1  
2  
3  
4  
5  
6  
7  
8  
9  
10  
11  
12  
13  
14  
15  
16  
17  
18  
19  
20  
21  
22  
23  
24  
25  
26  
27  
28  
29  
30  
31  
32  
33  
34  
35  
36  
37  
38  
39  
40  
41  
42  
43  
44  
45  
46  
47  
48  
49  
50  
51  
52  
53  
54  
55  
56  
57  
58  
59  
60

|           |                                                                                           |
|-----------|-------------------------------------------------------------------------------------------|
|           | Marcy, Olivier; UMR 1219                                                                  |
| Keywords: | Tuberculosis < INFECTIOUS DISEASES, HIV & AIDS < INFECTIOUS DISEASES, Observational Study |
|           |                                                                                           |

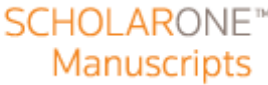

# The global Tuberculosis Sentinel Research Network (TB-SRN) of the International epidemiology Databases to Evaluate AIDS (IeDEA): protocol for a prospective multiregional cohort study

Leslie A. Enane<sup>1,2§</sup>, Stephany N. Duda<sup>3</sup>, Thida Chanyachukul<sup>4</sup>, Carolyn Bolton<sup>5</sup>, Neelima Navuluri<sup>6,7</sup>, Eugène Messou<sup>8</sup>, Nana Mbonze<sup>9</sup>, LaQuita R. McDade<sup>10</sup>, Marina Cruvinel Figueiredo<sup>11</sup>, Jeremy Ross<sup>4</sup>, Denise Evans<sup>12</sup>, Lameck Diero<sup>13</sup>, Robert Akpata<sup>14</sup>, Natalia Zotova<sup>15</sup>, Aimee Freeman<sup>16</sup>, Marie Flore Pierre<sup>17</sup>, Dhanushi Rupasinghe<sup>18</sup>, Marie Ballif<sup>19,20</sup>, Helen Byakwaga<sup>21</sup>, Nathalie de Castro<sup>14</sup>, Martine Tabala<sup>22</sup>, Timothy R. Sterling<sup>11</sup>, Annette H. Sohn<sup>4</sup>, Lukas Fenner<sup>19</sup>, Kara Wools-Kaloustian<sup>2,23</sup>, Armel Poda<sup>24</sup>, Marcel Yotebieng<sup>15</sup>, Robin Huebner<sup>25</sup>, and Olivier Marcy<sup>14</sup>, on behalf of the International epidemiology Databases to Evaluate AIDS

1 The Ryan White Center for Pediatric Infectious Diseases and Global Health, Department of Pediatrics, Indiana University School of Medicine, Indianapolis, Indiana, United States of America

2 Indiana University Center for Global Health Equity, Indianapolis, Indiana, United States of America

3 Department of Biomedical Informatics, Vanderbilt University School of Medicine, Nashville, Tennessee, United States of America

4 TREAT Asia/amfAR – The Foundation for AIDS Research, Bangkok, Thailand

5 Center for Infectious Disease Research in Zambia (CIDRZ), Lusaka, Zambia

6 Division of Pulmonary, Allergy, and Critical Care Medicine, Department of Medicine, Duke University School of Medicine, Durham, North Carolina, United States of America

7 Duke Global Health Institute, Duke University, Durham, North Carolina, United States of America

8 Centre de Prise en Charge de Recherche et de Formation (Aconda-CePReF), Abidjan, Côte d'Ivoire

9 Université Protestante du Congo, Kinshasa, Democratic Republic of the Congo

10 Vanderbilt Institute of Clinical and Translational Research, Vanderbilt University Medical Center, Nashville, Tennessee, United States of America

11 Vanderbilt Tuberculosis Center, Division of Infectious Diseases, Vanderbilt University School of Medicine, Nashville, Tennessee, United States of America

12 Health Economics and Epidemiology Research Office, Faculty of Health Sciences, University of the Witwatersrand, Johannesburg, South Africa

13 Department of Medicine, Moi University College of Health Sciences, Eldoret, Kenya

14 Université de Bordeaux, Bordeaux, France

15 Division of General Internal Medicine, Department of Medicine, Albert Einstein College of Medicine, The Bronx, New York, United States of America

- 1  
2  
3 16 Johns Hopkins Bloomberg School of Public Health, Baltimore, Maryland, United States of America  
4  
5 17 The Haitian Group for the Study of Kaposi's Sarcoma and Opportunistic Infections (GHESKIO), Port-  
6 au-Prince, Haiti  
7  
8 18 The Kirby Institute, UNSW, Sydney, Australia  
9  
10 19 Institute of Social and Preventive Medicine, University of Bern, Bern, Switzerland  
11  
12 20 Department of Infectious Diseases, Bern University Hospital and University of Bern, Bern,  
13 Switzerland  
14  
15 21 Mbarara University of Science and Technology, Mbarara, Uganda  
16  
17 22 Kinshasa School of Public Health, Université de Kishasa, Kinshasa, Democratic Republic of the  
18 Congo  
19  
20 23 Division of Infectious Diseases, Department of Medicine, Indiana University School of Medicine,  
21 Indianapolis, Indiana, United States of America  
22  
23 24 Centre Hospitalier Universitaire Sourô Sanou, Bobo-Dioulasso, Burkina Faso  
24  
25 25 Division of AIDS, National Institute of Allergy and Infectious Diseases, National Institutes of Health,  
26 Bethesda, Maryland, United States of America  
27  
28

26 § Corresponding author: Leslie A. Enane, MD MSc. 705 Riley Hospital Drive, Room 5925A. Indianapolis,  
27 Indiana, 46202, USA. Tel: +1-317-944-7260. E-mail: [lenane@iu.edu](mailto:lenane@iu.edu).  
28  
29  
30  
31

32 Key words: tuberculosis; HIV/AIDS; treatment outcomes; post-TB lung disease; observational cohort.  
33  
34  
35  
36  
37  
38  
39  
40  
41  
42  
43  
44  
45  
46  
47  
48  
49  
50  
51  
52  
53  
54  
55  
56  
57  
58  
59  
60

## ABSTRACT

**Introduction:** Tuberculosis (TB) is a leading infectious cause of death globally. It is the most common opportunistic infection in people living with HIV (PLHIV), and the most common cause of their morbidity and mortality. Following TB treatment, surviving individuals may be at risk for post-TB lung disease (PTLD). The Tuberculosis Sentinel Research Network (TB-SRN) provides a platform for coordinated observational TB research within the International epidemiology Databases to Evaluate AIDS (IeDEA) consortium.

**Methods and Analysis:** This prospective, observational cohort study will assess treatment and post-treatment outcomes of pulmonary TB (microbiologically confirmed or clinically diagnosed) among 2,600 people aged  $\geq 15$  years, with and without HIV co-infection, consecutively enrolled at 16 sites in 11 countries, across six of IeDEA's global regions. Data regarding clinical and sociodemographic factors, mental health, health-related quality of life, pulmonary function, and laboratory and radiographic findings will be collected using standardized questionnaires and data collection tools, beginning from the initiation of TB treatment and through 12 months after the end of treatment. Data will be aggregated for concept-driven analyses.

**Ethics and Dissemination:** Ethics approval has been obtained at all implementing study sites. Participants will provide informed consent; for minors, this includes both adolescent assent and the consent of their parent or primary caregiver. Protections for vulnerable groups are included, in alignment with local standards and considerations at sites. Procedures for requesting use and analysis of TB-SRN data are publicly available. Findings from TB-SRN analyses will be shared with national TB programs to inform TB programming and policy, and disseminated at regional and global conferences and other venues.

## Strengths and limitations of this study

Strengths of this study include:

- Use of a diverse, global cohort of individuals with and without HIV to study pulmonary TB treatment and post-treatment outcomes, with harmonization of procedures and variables across 16 sites in 11 countries, across six global leDEA regions.
- Comprehensive data collection, including sociodemographic, clinical, mental health, respiratory quality of life, spirometry, laboratory, and radiographic data, across the TB treatment and post-treatment time periods.
- Research follow-up through 12 months after the end of TB treatment, enabling investigations of longer-term outcomes after TB treatment, and correlation with factors ascertained at TB treatment initiation or during treatment.
- An inclusive approach informing real-world contexts of TB treatment. Specifically, this study includes both clinically diagnosed and microbiologically confirmed TB, and includes specific data collection and procedures for youth (ages 15-24) and for pregnant and post-partum participants.

Limitations of this study include:

- Some variations by region in TB management, available treatment support, and access to testing for diagnosis and monitoring (e.g., TB cultures). These will be noted and accounted for in planned analyses.

## INTRODUCTION

Before the onset of the coronavirus disease (COVID-19) pandemic, tuberculosis (TB) was the leading infectious cause of death globally by a single pathogen.<sup>1</sup> The COVID-19 pandemic has disrupted TB and HIV services, with attendant challenges for optimal diagnosis, control, and care management.<sup>1-4</sup> In the years since the onset of the COVID-19 pandemic, global estimates of TB disease, drug-resistant TB, and TB deaths have increased for the first time in many years.<sup>1-3</sup> In 2021, an estimated 10.6 million people developed TB disease and 1.6 million people died from TB.<sup>1</sup> Further—despite increasing global access to antiretroviral treatment (ART) and to TB preventive therapy (TPT) among people living with HIV (PLHIV)—TB remains the leading cause of morbidity and mortality among PLHIV.<sup>5-7</sup> In this context, data are urgently needed to inform global strategies to address the dual TB and HIV epidemics.

Critical evidence gaps exist with regard to drivers of unfavorable TB treatment outcomes, such as mortality, TB recurrence, and post-treatment sequelae/complications, including among PLHIV.<sup>5 8 9</sup> Addressing these gaps is particularly critical in light of recent acceleration towards shorter TB treatment regimens for both drug-susceptible and drug-resistant TB, and given the prospect of possible individualized approaches to treat both TB and post-TB lung disease (PTLD).<sup>10</sup> Key areas of ongoing research gaps relate to TB-HIV co-infection, treatment, and associated complications; consequences of drug-resistant TB; pulmonary complications and post-treatment outcomes; the impacts of psychosocial and life course factors on TB outcomes; and mental health outcomes of TB. A global prospective cohort of individuals with TB and with TB-HIV coinfection enables harmonized data collection and procedures to inform questions in these key areas.

The International epidemiology Databases to Evaluate AIDS (IeDEA) global research consortium—established by the US National Institutes of Health in 2006—collects and analyzes observational data in a clinical cohort of over 2.2 million people living with or affected by HIV, in 44 countries.<sup>11</sup> Data are organized by seven geographic regions, and coordinated by regional data centers.<sup>11</sup> IeDEA provides diverse global data from HIV treatment programs, and the Tuberculosis Sentinel Research Network (TB-SRN) of IeDEA aims to provide a global platform for coordinated observational TB research within the IeDEA consortium. The TB-SRN working group of IeDEA developed an observational cohort study protocol. To facilitate possible pooled global analyses, protocol development was based in part on the framework and original protocol of the Regional Prospective Observational Research in Tuberculosis (RePORT) International



Consortium.<sup>12-14</sup> The TB-SRN uses a common set of standards and definitions for prospective observational TB research. These were developed in alignment with the study concepts and measurement timepoints defined by RePORT International.<sup>12-14</sup> The TB-SRN will facilitate the use of pooled data to study pulmonary TB treatment and post-treatment outcomes among people with and without HIV at TB-SRN sites in six of leDEA's global regions. The resulting findings and study infrastructure may be used to inform policy and practice regarding TB treatment, and create a platform for additional regional and multiregional TB research within leDEA.

## METHODS AND ANALYSIS

### Objectives of the leDEA TB Sentinel Research Network

With its focus on HIV and associated co-infections and comorbidities, the global leDEA research consortium is ideally positioned to study TB outcomes among people with and without HIV. To accomplish this, the TB-SRN will study outcomes of people diagnosed with pulmonary TB through a network of 16 sentinel sites (Table 1) located in 11 low- and middle-income countries (LMIC) in six leDEA regions: Asia-Pacific, CCASAnet (Caribbean, Central and South America), Central Africa, East Africa, Southern Africa, and West Africa (Figure 1).

**Table 1.** Planned initial study sites in the Tuberculosis Sentinel Research Network (TB-SRN) of the International epidemiology Databases to Evaluate AIDS (leDEA), by leDEA region and target sample size.

| leDEA region | Site name                                                                     | Sample size |
|--------------|-------------------------------------------------------------------------------|-------------|
| Asia-Pacific | National Center for HIV, AIDS, Dermatology, and STDs, Cambodia                | 300         |
|              | HIV Netherlands-Australia-Thailand Research Collaboration (HIV-NAT), Thailand |             |
|              | Chiangrai Prachanukroh Hospital, Chiang Rai, Thailand                         |             |
| CCASAnet     | GHESKIO, Haiti                                                                | 100         |
|              | Instituto Nacional de Infectologia, Fiocruz-RJ, Brazil                        | 250         |
|              | Centro Municipal de Saude Duque de Caxias, Brazil                             | 250         |
|              | Instituto Brasileiro de Investigaçao da Tuberculose / Fiocruz-BA, Brazil      | 250         |

|                 |                                                                                           |     |
|-----------------|-------------------------------------------------------------------------------------------|-----|
|                 | Fundação de Medicina Tropical, Brazil                                                     | 250 |
| Central Africa  | Centre Hospitalier Kabinda, the Democratic Republic of the Congo                          | 300 |
|                 | Bondeko Health Center, Kinshasa, the Democratic Republic of the Congo                     |     |
| East Africa     | Academic Model Providing Access to Healthcare – Moi Teaching and Referral Hospital, Kenya | 200 |
|                 | Mbarara Regional Referral Hospital, Uganda                                                | 100 |
| Southern Africa | Kanyama and Chawama at CIDRZ, Zambia                                                      | 150 |
|                 | Themba Lethu and Crosby Clinic, South Africa                                              | 150 |
| West Africa     | CePReF, Abidjan, Côte d'Ivoire                                                            | 100 |
|                 | Centre Hospitalier Universitaire Sourou Sanon, Bobo Dioulasso, Burkina Faso               | 200 |

Abbreviations: CCASAnet, the Caribbean, Central and South America network for HIV epidemiology; CePReF, Centre de Prise en charge, de Recherche, et de Formation; CIDRZ, Centre for Infectious Disease Research in Zambia; GHESKIO, Groupe Haïtien d'Étude du Sarcome de Kaposi et des Infections Opportunistes.

There are three specific objectives of the TB-SRN. First, the TB-SRN will collect and analyze clinical and treatment data among people treated for pulmonary TB with or without HIV co-infection, to improve our understanding of the prognosis of TB disease and its health-related outcomes, including quality of life and survival. Second, the TB-SRN will assess the individual-level effects of HIV and antiretroviral therapy (ART) on TB symptomatology, diagnosis, treatment response, and survival. As part of this aim, investigators will also explore the effect of site-level TB and HIV management and integration of TB and HIV services on pulmonary TB treatment and longer-term outcomes. Third, the TB-SRN will describe PTLD and associations with HIV infection, diabetes, chronic lung disease, mental health, and tobacco, alcohol and substance use, including measuring physiologic, structural, and functional impairment, health-related quality of life, and survival.

## Study design

The TB-SRN is a prospective, observational study, with consecutive enrollment of PLHIV and HIV-negative individuals, ages 15 and above, with clinically diagnosed or microbiologically confirmed pulmonary TB disease. Microbiologic confirmation of pulmonary TB is defined on the basis of either positive molecular diagnostic test (e.g., GeneXpert), acid-fast bacilli smear, and/or TB culture from sputum or other respiratory specimen. Microbiologic confirmation of pulmonary TB may also be based on positive urine lipoarabinomannan assay in the presence of clinical signs, symptoms and/or radiographic findings of pulmonary TB. Clinically-diagnosed pulmonary TB is based on clinical diagnosis by medical providers through standard of care, in the absence of confirmatory testing. Individuals who consent to participate will provide clinical, laboratory, and radiographic data at study visits at specified timepoints from initiation of TB treatment through 12 months after the end of TB treatment (Table 2).

**Table 2.** Study procedures in the Tuberculosis Sentinel Research Network (TB-SRN) of the International epidemiology Databases to Evaluate AIDS (IeDEA).

| Form                                                                                                                        | Treatment Phase <sup>a</sup> |          |                        |                         |                             | Post-Treatment Phase          |                                | TX F/R/W |
|-----------------------------------------------------------------------------------------------------------------------------|------------------------------|----------|------------------------|-------------------------|-----------------------------|-------------------------------|--------------------------------|----------|
|                                                                                                                             | SCREENING                    | BASELINE | MONTH 1<br>(Weeks 3-7) | MONTH 2<br>(Weeks 8-12) | End of TX<br>(-4 to +6 wks) | 6-M POST-TX<br>(-4 to +6 wks) | 12-M POST-TX<br>(-4 to +6 wks) |          |
| Visit                                                                                                                       |                              |          |                        |                         |                             |                               |                                |          |
| <b>Informed consent</b> (and assent, <i>if applicable</i> ) <sup>b</sup>                                                    | X                            |          |                        |                         |                             |                               |                                |          |
| <b>Demographics</b><br>Including adolescent and young adult characteristics ( <i>if applicable</i> ) <sup>c</sup>           |                              | X        |                        |                         |                             |                               |                                |          |
| <b>Clinical history:</b>                                                                                                    |                              |          |                        |                         |                             |                               |                                |          |
| • TB history and current diagnosis                                                                                          |                              | X        |                        |                         |                             |                               |                                | X        |
| • HIV and other medical history                                                                                             |                              | X        |                        |                         |                             |                               |                                |          |
| • Pregnancy and post-partum history ( <i>female participants only</i> )                                                     |                              | X        |                        |                         | X                           | X                             | X                              | X        |
| • Pregnancy and infant outcomes ( <i>if applicable</i> )                                                                    |                              | X        |                        |                         | X                           | X                             | X                              | X        |
| <b>Clinical evaluation</b><br>Visit information, vital signs including pulse oximetry, respiratory symptoms, physical signs |                              | X        | X                      | X                       | X                           | X                             | X                              | X        |
| <b>Substance use</b><br>ASSIST and smoking history                                                                          |                              | X        |                        |                         | X                           |                               | X                              | X        |
| <b>Respiratory symptoms and health-related quality of life</b><br>SGRQ                                                      |                              | X        |                        |                         | X                           | X                             | X                              | X        |
| <b>Depression symptoms</b>                                                                                                  |                              | X        |                        |                         | X                           |                               | X                              | X        |

|                                                                                      |  |   |   |   |   |   |   |   |
|--------------------------------------------------------------------------------------|--|---|---|---|---|---|---|---|
| PHQ-9 and suicide risk assessment                                                    |  |   |   |   |   |   |   |   |
| <b>Pulmonary testing:<sup>d</sup></b>                                                |  |   |   |   |   |   |   |   |
| • Spirometry                                                                         |  |   |   | X | X | X |   |   |
| • 1-minute sit-to-stand test                                                         |  | X |   | X | X | X |   |   |
| <b>Performed if not already done as part of care:</b>                                |  |   |   |   |   |   |   |   |
| • Chest X-ray <sup>e</sup>                                                           |  | X |   |   | X |   |   |   |
| • CD4 count ( <i>only for participants with HIV</i> ) <sup>f</sup>                   |  | X |   |   |   |   |   | X |
| • HbA1c and random blood glucose                                                     |  | X |   |   | X |   |   |   |
| <b>Data collected from routine care, as available:</b>                               |  |   |   |   |   |   |   |   |
| • TB microbiology                                                                    |  | X | X | X | X |   |   | X |
| • HIV testing and other lab results <sup>g</sup>                                     |  | X | X | X | X | X | X | X |
| <b>TB treatment</b>                                                                  |  |   |   |   |   |   |   |   |
| Anti-TB regimen, adherence to medications, use and type of directly observed therapy |  | X | X | X | X |   |   | X |
| <b>Antiretroviral treatment (<i>if applicable</i>)</b>                               |  |   |   |   |   |   |   |   |
| ARV regimen, adherence to medications                                                |  | X | X | X | X | X | X | X |
| <b>Adverse events</b>                                                                |  |   | X | X | X |   |   | X |
| <b>TB IRIS evaluation</b>                                                            |  |   | X | X |   |   |   |   |
| <b>TB treatment outcome</b>                                                          |  |   |   |   | X |   |   | X |
| <b>Death form (<i>death during study, if applicable</i>)</b>                         |  |   |   |   |   |   |   |   |

Abbreviations: ASSIST, Alcohol, Smoking and Substance Involvement Screening Test; IRIS, immune reconstitution inflammatory syndrome; PHQ-9, Patient Health Questionnaire; SGRQ, Saint George's Respiratory Questionnaire. a, Month 1 visit is optional, and not done at all sites. Tx F/R/W, Treatment Failure, Relapse, or Withdrawal. b, Adolescent minors who turn 18 years of age during the study will be re-consented on the first visit after turning age 18. c, For all youth participants ages 15-24 on enrollment. d, For 12 sites performing pulmonary testing. e, Digitized/digitizable chest X-ray (CXR) obtained, unless done within 4 weeks prior to the Baseline or End of Treatment as per standard of care. CXRs obtained at other time points through routine care will also be digitized/uploaded. Pregnant women are not required to have a CXR; regions may vary in approach in this population according to local standards. f, CD4 count will only be performed on participants who are HIV-positive and who have not had a CD4 count performed in the preceding 3 months. g, HIV testing of participants not known to be positive collected from routine data and not as part of the study. HIV viral load (if applicable), CBC, transaminases, and TB microbiology data to be abstracted if available.

Most participants, if completing a standard duration of six months of TB treatment for drug-susceptible TB, will consequently be followed for a total of 18 months from TB treatment initiation.

1  
2  
3 Time on study will be longer, however, if treatment duration is longer as determined by providers  
4 under standard of care. (Treatment duration may be longer than six months, for example, for  
5 some regimens for drug-resistant TB, or if treatment is interrupted, or if pulmonary disease  
6 coincides with infection at an extrapulmonary site warranting longer treatment duration.) In  
7 addition, some regions have longer follow-up periods after end of TB treatment, according to  
8 region-specific objectives. Some regions will also have data collection beyond this multiregional  
9 protocol, such as for laboratory biomarkers, pharmacokinetic data, or biological specimens. Data  
10 will be aggregated for concept-driven analyses.  
11  
12  
13  
14  
15

## 16 **Sample selection**

### 17 *TB-SRN Sites*

18  
19 Sixteen sites included in the TB-SRN are located in 11 countries: Brazil, Burkina Faso, Cambodia,  
20 Côte d'Ivoire, the Democratic Republic of the Congo, Haiti, Kenya, South Africa, Thailand,  
21 Uganda, and Zambia. These sites represent a range of contexts for the dual TB-HIV epidemics,  
22 including differing prevalence of TB and HIV, care models, and resources. Analyses in this study  
23 will include comparisons by site-level variables or by region.  
24  
25  
26  
27  
28  
29  
30

### 31 *Eligibility and exclusion criteria*

32 The leDEA TB-SRN will enroll participants ages 15 and older with clinically diagnosed or  
33 microbiologically confirmed active pulmonary TB who are initiating TB treatment at leDEA TB-  
34 SRN sites. Participants must have either documentation of recent HIV testing or of HIV infection  
35 or willingness to be tested for HIV, as routinely indicated under TB treatment guidelines.<sup>15</sup>  
36 Informed consent will be required for all participants; including parental/caregiver consent and  
37 minor assent for individuals younger than age 18 (or the legal age of majority). There will be no  
38 restrictions based on sex, gender identity, HIV status, pregnancy, ethnicity, or nationality.  
39 Participants may be co-enrolled in other research with the exception of clinical trials of novel TB  
40 treatment regimens.  
41  
42  
43  
44  
45  
46

47 An individual will be excluded if they meet any of the following criteria: have received >7  
48 days of TB treatment within the prior 30 days, excluding TB preventive therapy; have imminent  
49 plans to follow-up for TB care or relocate/return to a site distant from the enrollment site, which  
50 would interfere with the participant's ability to complete all study visits; have substantial cognitive  
51 impairment that may interfere with the ability to give reliable informed consent; are currently  
52 imprisoned.  
53  
54  
55  
56  
57  
58  
59  
60

### *Participant considerations*

The inclusion of participants with and without HIV will facilitate analyses in which HIV status is evaluated as a factor potentially contributing to TB treatment or post-treatment outcomes. The proportion of participants with HIV co-infection is anticipated to vary across sites. The TB-SRN will target a proportion of 20-30% with TB-HIV co-infection across the global cohort.

The inclusion of participants ages 15 and above will allow for dedicated analyses of participants in the 15–24-year-old age group of youth with TB. While youth have specific needs that must be addressed in quality health services, TB programs globally have not adopted youth-centered care models.<sup>16-19</sup> Further, adolescents and youth have been neglected in TB research, either by failure to include individuals younger than age 18, or by not examining research data within stratified adolescent or young adult age groups.<sup>18 19</sup> Guidance from the WHO now advises that youth and their specific needs should be included in global TB research and care efforts.<sup>20-22</sup> This study will assess clinical characteristics, TB outcomes, and post-treatment outcomes in a sub-cohort of youth with TB across 5-year age strata (i.e., older adolescents aged 15-19 and young adults aged 20-24 years).

TB during pregnancy can cause poor outcomes for both the mother and for the developing fetus (or infant, after delivery), including maternal complications, miscarriage, preterm birth, low birthweight, or perinatal death.<sup>23-26</sup> Existing data regarding clinical features and outcomes of TB in pregnancy are very limited. Pregnant and post-partum individuals with TB (who have been pregnant within the last 12 months) will be included in TB-SRN. Data collection will include specific variables related to pregnancy, receipt of TB and HIV medications during pregnancy, and maternal and infant outcomes. These will be collected over the course of the study period, including for individuals who become pregnant or give birth during the study.

### **Patient and public involvement**

Key research questions of this study were informed by previous participatory research and advocacy from individuals with TB; in particular, calling for research in PTLD and other post-treatment outcomes,<sup>27</sup> and for inclusion of adolescent minors in research.<sup>22</sup> Individuals with TB were not involved in the study's design. Draft case report forms (CRFs) were revised through iterative rounds of review and preliminary piloting at the study sites. In particular, clinical programs at the sites were involved in revisions at this stage to ensure the feasibility of CRFs and to minimize burdens on individuals with TB participating in the study. Clinical programs at the sites

1  
2  
3 were also consulted related to study planning. This included preparations for referral for  
4 immediate and urgent health needs, such as for symptoms of depression and suicidal thinking  
5 (assessed by PHQ-9 and suicide risk assessment). Findings from this research will be shared  
6 with national TB programs and HIV treatment programs at the study sites, and disseminated to  
7 individuals with TB.  
8  
9  
10

### 11 12 **Assessments and data collection**

13  
14 Data (e.g., chest X-rays, laboratory results, health-related outcome measures; Table 2) will be  
15 collected according to a common schedule and methodology across sites, so that they can be  
16 harmonized and aggregated for analysis.  
17  
18

19 Participants who consent to the study will be followed during TB treatment and for 12  
20 months after the end of their primary treatment course (i.e., the treatment course initiated at study  
21 enrollment). For most participants, this will be approximately 18 months after provisional  
22 enrollment/treatment start if they have drug-susceptible TB and receive a 6-month TB treatment  
23 regimen, but it may be longer if they have drug-resistant TB or require a longer treatment regimen  
24 for other reasons (e.g., if there is associated extrapulmonary TB disease). At the time of this study,  
25 TB programs at the study sites are primarily using treatment regimens of 6 months' duration as  
26 routine standard for drug-susceptible pulmonary TB.  
27  
28  
29  
30  
31

32 Participants will be requested to provide data during visits at key timepoints: at baseline  
33 (at initiation of TB treatment), month 1 (optional; performed at some but not all sites), month 2,  
34 end of TB treatment, 6 months post-treatment, 12 months post-treatment, and at the time of  
35 suspected or apparent treatment failure, TB recurrence, or study withdrawal if it occurs during  
36 treatment or the 12-month post-treatment follow-up phase. The baseline visit will include detailed  
37 clinical history, including course of TB symptoms and diagnosis, previous TB, HIV diagnosis and  
38 treatment (as applicable), history regarding recent or current pregnancy, and history regarding  
39 non-communicable co-morbidities and their treatment (e.g., diabetes mellitus, hypertension,  
40 pulmonary or cardiovascular disease, cancer, immune suppression, mental health diagnoses).  
41 Sociodemographic information will be collected including specific information relevant to youth  
42 ages 15-24 at enrollment. Data collected at multiple visits during the study will include TB  
43 symptoms; ascertainment of immune reconstitution inflammatory syndrome (IRIS), TB treatment  
44 failure, or TB recurrence; clinical, radiographic and microbiologic data related to TB; assessments  
45 for symptoms of depression (by the Patient Health Questionnaire; PHQ-9)<sup>28</sup> and substance use  
46 (by the Alcohol, Smoking, and Substance Involvement Screening Test; ASSIST);<sup>29 30</sup> and  
47 pulmonary investigations including repeated pulse oximetry, spirometry, functional test (1-minute  
48  
49  
50  
51  
52  
53  
54  
55  
56  
57  
58  
59  
60

1  
2  
3 sit-to-stand test), and respiratory symptoms and health-related quality of life (by the Saint  
4 George's Respiratory Questionnaire; SGRQ).<sup>31 32</sup> These validated questionnaires have been used  
5 previously in the respective regions, with adaptations as appropriate (e.g., PHQ-9, ASSIST,  
6 SGRQ).  
7  
8

9  
10 Data will be collected on paper or electronic CRFs according to local capacity and  
11 regulatory requirements. Paper forms will be subsequently entered into the electronic system by  
12 trained personnel. All sites will use the secure, web-based REDCap data collection platform  
13 and/or the REDCap Mobile App for data collection.<sup>33 34</sup> Common data management processes  
14 and procedures will be developed in collaboration with the Harmonist team at Vanderbilt  
15 University Medical Center, which provides informatics resources for leDEA.<sup>35 36</sup> For sites using  
16 film-based chest X-rays, films will be scanned and digitized using standard procedures defined  
17 by the NIH TB Portals platform.<sup>37</sup>  
18  
19

20  
21 Sites will work with the leDEA regional data centers to enter, prepare, and clean data  
22 using either the Vanderbilt REDCap server or a regional REDCap server to adhere to country  
23 regulations on research data storage. All sites will use the same REDCap project template to  
24 ensure variables and study events use the same names and code lists to facilitate subsequent  
25 data merging. Research staff will administer questionnaires using relevant local translations (i.e.,  
26 in French, Swahili, Runyankole) and adaptations as appropriate, implemented in paper CRFs and  
27 in the REDCap data collection platform. Regional data centers will conduct quality control or  
28 assurance activities for their sites based on guidance developed by the TB-SRN study team and  
29 the Harmonist team.<sup>35 36</sup>  
30  
31  
32  
33  
34  
35  
36  
37  
38

### 39 Outcome measures

40 Multiple outcomes will be assessed in the TB-SRN (Table 3). These include TB treatment  
41 outcomes; TB recurrence; mortality; other pulmonary, health-related quality of life, and mental  
42 health outcomes.  
43  
44  
45  
46

47 **Table 3.** Select study outcomes in the Tuberculosis Sentinel Research Network (TB-SRN) of  
48 the International epidemiology Databases to Evaluate AIDS (leDEA).  
49

| 51 Outcome                                   | 52 Definition                             |
|----------------------------------------------|-------------------------------------------|
| 53 TB treatment<br>54 outcomes <sup>38</sup> | 55 As defined by WHO: <sup>38</sup><br>56 |



|                                           |                                                                                                                                                                                                                                                                                                                                                                                                                                                                                                                                                                                                                                                                                                                                                                                                                                                                                                                                                     |
|-------------------------------------------|-----------------------------------------------------------------------------------------------------------------------------------------------------------------------------------------------------------------------------------------------------------------------------------------------------------------------------------------------------------------------------------------------------------------------------------------------------------------------------------------------------------------------------------------------------------------------------------------------------------------------------------------------------------------------------------------------------------------------------------------------------------------------------------------------------------------------------------------------------------------------------------------------------------------------------------------------------|
|                                           | <ul style="list-style-type: none"> <li>• Treatment failed: A patient whose treatment regimen needed to be terminated or permanently changed to a new regimen or treatment strategy.</li> <li>• Cured: A pulmonary TB patient with bacteriologically confirmed TB at the beginning of treatment who completed treatment as recommended by the national policy, with evidence of bacteriological response and no evidence of failure.</li> <li>• Treatment completed: A patient who completed treatment as recommended by the national policy, whose outcome does not meet the definition for cure or treatment failure.</li> <li>• Died: A patient who died before starting treatment or during the course of treatment.</li> <li>• Lost to follow-up: A patient who did not start treatment or whose treatment was interrupted for 2 consecutive months or more.</li> <li>• Treatment success: The sum of cured and treatment completed.</li> </ul> |
| TB recurrence                             | Any new TB diagnosis after the end of TB treatment                                                                                                                                                                                                                                                                                                                                                                                                                                                                                                                                                                                                                                                                                                                                                                                                                                                                                                  |
| Post-TB Mortality                         | Death from any cause after end of TB treatment <sup>a</sup>                                                                                                                                                                                                                                                                                                                                                                                                                                                                                                                                                                                                                                                                                                                                                                                                                                                                                         |
| Sustained treatment success <sup>38</sup> | An individual assessed at 6 months (for DR-TB and DS-TB) and at 12 months (for DR-TB only) after successful TB treatment, who is alive and free of TB. <sup>38</sup>                                                                                                                                                                                                                                                                                                                                                                                                                                                                                                                                                                                                                                                                                                                                                                                |
| PTLD                                      | <p>Characterized by any of the following, after completion of TB treatment and in the absence of TB recurrence:<sup>39</sup></p> <ul style="list-style-type: none"> <li>• Symptoms (new / recurrent / persistent from end of treatment) <ul style="list-style-type: none"> <li>○ Respiratory distress, cough, dyspnea/shortness of breath, hemoptysis, chest pain</li> </ul> </li> <li>• Signs (new / recurrent / persistent from end of treatment) <ul style="list-style-type: none"> <li>○ Crackles, wheezing, diminished breath sounds</li> </ul> </li> <li>• Hypoxemia (SpO<sub>2</sub> &lt; 90%)</li> <li>• Pulmonary function impairment (e.g., FEV<sub>1</sub> / FVC ratio &lt; LLN, FEV<sub>1</sub> &lt; LLN, and/or FVC &lt; LLN)</li> </ul>                                                                                                                                                                                               |

|                                |                                                                                                                                                                 |
|--------------------------------|-----------------------------------------------------------------------------------------------------------------------------------------------------------------|
|                                | <ul style="list-style-type: none"> <li>• Chest X-ray abnormalities (e.g., residual scarring) at end of treatment</li> </ul>                                     |
| Functional status              | One-minute sit-to-stand testing                                                                                                                                 |
| Health-related quality of life | St. George's Respiratory Questionnaire (SGRQ) <sup>31 32</sup> score                                                                                            |
| Depression symptoms            | Patient Health Questionnaire (PHQ-9) <sup>28</sup> scores for none or minimal (0-4), mild (5-9), moderate (10-14), moderately severe (15-19), or severe (20-27) |

Abbreviations: DR-TB, drug-resistant tuberculosis; DS-TB, drug-susceptible tuberculosis; FEV1, forced expiratory volume in one second; FVC, forced vital capacity; LLN, lower limit of normal; PTLTD, post-tuberculosis lung disease; TB, tuberculosis; WHO, World Health Organization. a, Information about cause of death will be recorded if available.

TB treatment outcomes for both drug-resistant and drug-susceptible TB will follow the current definitions set by the WHO and will be in alignment with RePORT International outcomes.<sup>12 38</sup> These include both clinical and biological criteria for TB treatment outcomes. TB recurrence (inclusive of TB relapse and new TB infection) will be defined as any new TB diagnosis after the end of TB treatment for the primary course. Mortality will include deaths from any cause, and will be assessed during the treatment and post-treatment periods. Information about cause of death will be recorded if available.

Post-treatment outcomes will be ascertained. PTLTD will be defined by new, recurrent or persistent respiratory symptoms or signs post-treatment; hypoxemia (oxygen saturation <90%); or pulmonary function impairment (e.g., forced expiratory volume in one second (FEV1) / Forced vital capacity (FVC) ratio < lower limit of normal (LLN), FEV1 <LLN, and/or FVC <LLN) or chest X-ray abnormalities).<sup>39</sup> Symptoms of depression will be assessed (by PHQ-9).<sup>28</sup> Health-related quality of life will be assessed (by SGRQ).<sup>31 32</sup> Functional status will be assessed with one-minute sit-to-stand testing.

### Data management and harmonization

1  
2  
3 TB-SRN data from multiple REDCap installations will be accessed via the secure REDCap  
4 Application Programming Interface (REDCap API) and automatically merged on a monthly basis  
5 to generate study enrollment and monitoring reports. These reports will allow tracking of study  
6 progress and ensure the distributed data collection remains aligned in variable formats and  
7 naming. Merged research datasets will be generated on demand for analyses associated with  
8 approved research concepts. Analyses will be conducted by the designated regional data center.  
9 Data-sharing agreements and management procedures will be overseen by the leDEA Executive  
10 Committee.  
11  
12  
13  
14  
15

16 The NIH, which funds both the leDEA consortium and RePORT International, provides  
17 guidance for the coordination and linkage of these parallel streams of research. In addition, the  
18 Harmonist project, which supports leDEA through development of data standards and software  
19 to support research operations, will coordinate with RePORT regions to streamline their existing  
20 data structures and identify points of data alignment with leDEA to enable future cross-consortium  
21 data harmonization and research.  
22  
23  
24  
25  
26

### 27 **Data analysis plan**

28 While data may be used by the individual TB-SRN sites or regions, they are primarily being  
29 collected and harmonized for multiregional research, following leDEA's standard operating  
30 procedures governing research collaboration.<sup>40</sup> Analyses of global TB-SRN data will be proposed  
31 through concept sheets, for detailed review and feedback from collaborators in the TB-SRN and  
32 other leDEA working groups relevant to the study, with subsequent final review and approval by  
33 the leDEA Executive Committee. Concepts will center on major research questions in TB and HIV  
34 clinical epidemiology.<sup>41</sup> These will include analyses of TB severity, TB treatment and post-  
35 treatment outcomes including PTLT, health-related quality of life, and associated clinical, mental  
36 health, and life course factors (Box 1). Youth with TB (ages 15-24) will be assessed as a subset  
37 of this cohort, with attention to their clinical, psychosocial, and lung health findings. The subset of  
38 pregnant and post-partum participants will also be described, to include specific variables and  
39 outcomes in this group.  
40  
41  
42  
43  
44  
45  
46  
47  
48  
49

50 **Box 1.** Select priority areas for observational research in the Tuberculosis Sentinel Research  
51 Network (TB-SRN) of the International epidemiology Databases to Evaluate AIDS (leDEA).  
52  
53  
54  
55  
56  
57  
58  
59  
60

### Areas of investigation

- Drivers of TB severity, treatment outcomes, and post-treatment outcomes – particularly the impacts of HIV infection and ART
- TB severity
- TB IRIS
- Drug-resistant TB
- Post-tuberculosis lung disease
- Depression symptoms and reported suicidal ideation
- Alcohol, tobacco, and substance use
- Youth life stage (ages 15-24)
- Maternal and infant outcomes of TB in pregnancy and in the post-partum period<sup>a</sup>

Abbreviations: ART, antiretroviral treatment; HIV, human immunodeficiency virus; IRIS, immune reconstitution inflammatory syndrome; TB, tuberculosis. a, Assessed in a limited number of anticipated participants with current or recent pregnancy during the study.

### Sample size considerations

The leDEA TB-SRN will enroll 2,600 participants across all study sites. As the TB-SRN is a descriptive study encompassing multiple planned outcomes and analyses, sample sizes will vary by concept. For example, estimates of TB recurrence among active TB cases were abstracted from the literature; it is estimated that between 5% and 10% of treated TB cases will result in TB recurrence. Thus, if 2,600 active TB participants are enrolled, it is expected that between 130 and 260 episodes of recurrence will occur, with 200 being an approximate midpoint estimate. Furthermore, based on previous research, the majority of recurrent episodes are estimated to occur within 6 months of treatment completion, and thus >90% of all such episodes are expected to be detected during the follow-up period. The expected proportion of individual participants with HIV is anticipated to be 20 to 30% across the global cohort, which will allow assessments of HIV co-infection as a potential major risk factor in multivariable analyses.

For analyses of youth with TB, this age group is estimated to make up 17% of new TB cases globally.<sup>42</sup> In a cohort of 2,600 individuals with TB, we anticipate including several hundred

1  
2  
3 in this age group; representing a valuable contribution to the evidence base for this group.<sup>18 19</sup> For  
4 pregnant/post-partum participants with TB, while low numbers are anticipated, relevant variables  
5 collected in this study for maternal and infant outcomes will be described. Given the very limited  
6 existing data on this population, these data will add to the existing literature.<sup>23 24 26</sup> Aggregation  
7 with data from other cohorts may be considered for pooled analyses of priority questions for TB  
8 in these sub-groups.<sup>18 19 41</sup>  
9  
10  
11  
12  
13

## 14 **ETHICS AND DISSEMINATION**

### 15 **Ethical and safety considerations**

16  
17  
18 Ethical and regulatory approvals have been obtained at all implementing study sites. Overarching  
19 ethical considerations have included the general low risk of this observational study; assurances  
20 that the decision whether or not to participate will have no bearing on clinical care received at the  
21 sites; strict protocols to ensure privacy and confidentiality of participant data; adherence to  
22 infection prevention protocols at the study sites; compensation for time/travel to participate; and  
23 specific considerations for inclusion of minors and pregnant individuals (as described below).  
24  
25  
26  
27  
28

29 Standardized procedures are in place to ensure appropriate linkage to care and further  
30 evaluation when study assessments identify a possible physical or mental health condition. This  
31 includes procedures for direct linkage to care when symptoms of depression or suicidal ideation  
32 are identified.  
33  
34

35 In terms of safety considerations, this study is intended to ascertain detailed data  
36 collection for individuals with pulmonary TB followed in routine TB care and management. The  
37 inclusion of minors and of individuals who are pregnant is to ensure that these groups are not  
38 excluded from TB research. This is particularly important given that these groups have largely  
39 been excluded from TB research, or specific data have not been collected that are relevant to  
40 their clinical or social factors or outcomes. Sites follow locally approved protocols with respect to  
41 use of chest X-ray in pregnancy.  
42  
43  
44  
45

46 While chest X-rays are recommended as part of routine TB care<sup>15</sup> and the amount of  
47 radiation exposure from an X-ray procedure is considered safe in pregnancy when clinically  
48 indicated,<sup>43-45</sup> chest X-rays are not required for pregnant participants with TB in this study. Further,  
49 ethical approvals followed local standards and approval processes for consideration of chest X-  
50 rays in this population.  
51  
52  
53

54 Similarly, sites follow local standards and approvals for inclusion of minors. General  
55 approaches include requiring the consent of a parent or primary caregiver, along with assent of  
56  
57  
58  
59

1  
2  
3 minors. Procedures are in place in recruitment and study activities to avoid inadvertent HIV  
4 disclosure to youth who have perinatally acquired HIV or to caregivers who may not be aware of  
5 a youth's status.  
6  
7

### 8 9 **Dissemination plan**

10 Findings from TB-SRN analyses will be disseminated across the leDEA consortium, and at site-  
11 level, regional, and global venues. Policy briefs will be developed summarizing key study findings.  
12 These will be provided in direct communication with national TB programs and with national HIV  
13 programs to share and disseminate findings across these systems. Findings will be disseminated  
14 to study participants, and to TB care providers and individuals affected by TB, following setting-  
15 specific approaches at respective study sites.  
16  
17

18 Research findings from global and regional analyses will be presented at national and  
19 international meetings, and published in international peer-reviewed journals for a wide audience  
20 of clinicians, researchers, and public health practitioners in the areas of TB and HIV care and lung  
21 health. Publications will be disseminated to global TB networks, including to World Health  
22 Organization Global TB Program working group leads as appropriate, and to relevant sections of  
23 the International Union Against Tuberculosis and Lung Disease.  
24  
25

26 TB-SRN data can be leveraged towards future research. Researchers from beyond the  
27 leDEA research consortium may request leDEA data for dedicated analyses. Procedures for  
28 requesting use of TB-SRN data are publicly available.<sup>40</sup>  
29  
30

### 31 32 33 34 35 36 37 **CONCLUSION**

38 The TB-SRN provides a unique platform for global observational research in TB and TB-HIV co-  
39 infection. Through harmonized procedures and comprehensive prospective data collection across  
40 TB treatment and post-treatment periods, the TB-SRN will generate key epidemiology data for  
41 drivers and correlates of TB treatment and post-treatment outcomes, across a diverse global  
42 cohort. Findings from this project will inform policy and practice regarding TB treatment, and  
43 further research efforts.  
44  
45  
46  
47  
48  
49

### 50 51 52 53 **Acknowledgments**

1  
2  
3 We thank the individual participants, their care providers, and the study teams implementing the  
4 TB-SRN study across the clinical research sites for their support. We also acknowledge the  
5 contributions of members of the leDEA TB-SRN and TB and Lung Health Working Groups to the  
6 development and finalization of the study protocol, and the Harmonist team for their work on the  
7 data management and harmonization framework and tools.  
8  
9  
10

### 11 12 **Authors' contributions**

13 LAE, OM, AHS, SND, AF, KWK, MY, and additional members of the leDEA Executive Committee  
14 designed this study and drafted the study protocol. TRS, MCF, TC, and others contributed to  
15 revisions and refinements to the protocol. LAE, OM, SND, and LM led the development and  
16 refinement of data collection tools. TC, MB, LF, FM, KWK, and NN and others provided input on  
17 study procedures and data collection tools. SND and LM developed the REDCap database for  
18 data collection under the multiregional protocol. LAE drafted the manuscript. All authors  
19 participated in manuscript revisions. All authors have read and approved the final manuscript.  
20  
21  
22  
23  
24  
25  
26

### 27 **Funding**

28 Dr. Enane is supported by the *Eunice Kennedy Shriver* National Institute of Child Health & Human  
29 Development (NICHD) under Award Number K23HD095778. Dr. Navuluri is supported by the  
30 Francis Family Foundation under the Parker B. Francis Fellowship. The International  
31 Epidemiology Databases to Evaluate AIDS (leDEA) is supported by the U.S. National Institutes  
32 of Health's National Institute of Allergy and Infectious Diseases, the *Eunice Kennedy*  
33 *Shriver* National Institute of Child Health and Human Development, the National Cancer Institute,  
34 the National Institute of Mental Health, the National Institute on Drug Abuse, the National Heart,  
35 Lung, and Blood Institute, the National Institute on Alcohol Abuse and Alcoholism, the National  
36 Institute of Diabetes and Digestive and Kidney Diseases, and the Fogarty International  
37 Center: **Asia-Pacific**, U01AI069907; **CCASAnet** and **RePORT-Brazil**, U01AI069923; **Central**  
38 **Africa**, U01AI096299; **East Africa**, U01AI069911; **NA-ACCORD**, U01AI069918; **Southern**  
39 **Africa**, U01AI069924; **West Africa**, U01AI069919; **RePORT-Brazil**, U01AI172064, CRDF  
40 Global R-202208-69014, Departamento de Ciência e Tecnologia (DECIT) - Secretaria de Ciência  
41 e Tecnologia (SCTIE) – Ministério da Saúde (MS), Brazil (25029.000507/2013-07). Informatics  
42 resources are supported by the Harmonist project, R24AI24872. This work is solely the  
43 responsibility of the authors and does not necessarily represent the official views of any of the  
44 institutions mentioned above.  
45  
46  
47  
48  
49  
50  
51  
52  
53  
54  
55  
56  
57  
58  
59  
60

### Competing interests

AHS receives grants to her institution from ViiV Healthcare and Gilead Sciences.

All other authors declare no conflicts of interest.

**Figure 1.** Country locations of planned initial study sites in the Tuberculosis Sentinel Research Network (TB-SRN) of the International epidemiology Databases to Evaluate AIDS (IeDEA). Map created using MapChart.net.<sup>46</sup>

### References

1. World Health Organization. Global Tuberculosis Report 2022. Geneva, 2022.
2. McQuaid CF, Vassall A, Cohen T, et al. The impact of COVID-19 on TB: a review of the data. *Int J Tuberc Lung Dis* 2021;25(6):436-46. doi: 10.5588/ijtld.21.0148 [published Online First: 2021/05/30]
3. Visca D, Ong CWM, Tiberi S, et al. Tuberculosis and COVID-19 interaction: A review of biological, clinical and public health effects. *Pulmonology* 2021;27(2):151-65. doi: 10.1016/j.pulmoe.2020.12.012 [published Online First: 2021/02/07]
4. Marti M, Zurcher K, Enane LA, et al. Impact of the COVID-19 pandemic on TB services at ART programmes in low- and middle-income countries: a multi-cohort survey. *J Int AIDS Soc* 2022;25(10):e26018. doi: 10.1002/jia2.26018 [published Online First: 2022/10/27]
5. Sullivan A, Nathavitharana RR. Addressing TB-related mortality in adults living with HIV: a review of the challenges and potential solutions. *Ther Adv Infect Dis* 2022;9:20499361221084163. doi: 10.1177/20499361221084163 [published Online First: 2022/03/25]
6. Nliwasa M, MacPherson P, Gupta-Wright A, et al. High HIV and active tuberculosis prevalence and increased mortality risk in adults with symptoms of TB: a systematic review and meta-analyses. *J Int AIDS Soc* 2018;21(7):e25162. doi: 10.1002/jia2.25162 [published Online First: 2018/08/01]
7. Ford N, Matteelli A, Shubber Z, et al. TB as a cause of hospitalization and in-hospital mortality among people living with HIV worldwide: a systematic review and meta-analysis. *J Int AIDS Soc* 2016;19(1):20714. doi: 10.7448/IAS.19.1.20714 [published Online First: 2016/01/15]



- 1  
2  
3 8. Tornheim JA, Dooley KE. Challenges of TB and HIV co-treatment: updates and insights. *Curr*  
4 *Opin HIV AIDS* 2018;13(6):486-91. doi: 10.1097/COH.0000000000000495 [published  
5 Online First: 2018/08/07]  
6  
7
- 8 9. Weld ED, Dooley KE. State-of-the-Art Review of HIV-TB Coinfection in Special Populations.  
9 *Clin Pharmacol Ther* 2018;104(6):1098-109. doi: 10.1002/cpt.1221 [published Online  
10 First: 2018/08/24]  
11
- 12 10. Adjobimey M, Behr MA, Menzies D. Individualized Treatment Duration in Tuberculosis  
13 Treatment: Precision versus Simplicity. *Am J Respir Crit Care Med* 2021;204(9):1013-  
14 14. doi: 10.1164/rccm.202107-1744ED [published Online First: 2021/08/26]  
15  
16
- 17 11. International epidemiology Databases to Evaluate AIDS (IeDEA). International epidemiology  
18 Databases to Evaluate AIDS (IeDEA) [Available from: <https://www.iedea.org> accessed  
19 June 28 2023].  
20  
21
- 22 12. Hamilton CD, Swaminathan S, Christopher DJ, et al. RePORT International: Advancing  
23 Tuberculosis Biomarker Research Through Global Collaboration. *Clin Infect Dis*  
24 2015;61Suppl 3:S155-9. doi: 10.1093/cid/civ611 [published Online First: 2015/09/27]  
25  
26
- 27 13. Geadas C, Stoszek SK, Sherman D, et al. Advances in basic and translational tuberculosis  
28 research: Proceedings of the first meeting of RePORT international. *Tuberculosis*  
29 *(Edinb)* 2017;102:55-67. doi: 10.1016/j.tube.2016.11.006 [published Online First:  
30 2017/01/08]  
31  
32
- 33 14. van der Heijden YF, Abdullah F, Andrade BB, et al. Building capacity for advances in  
34 tuberculosis research; proceedings of the third RePORT international meeting.  
35 *Tuberculosis (Edinb)* 2018;113:153-62. doi: 10.1016/j.tube.2018.09.009 [published  
36 Online First: 2018/12/06]  
37  
38
- 39 15. World Health Organization. WHO consolidated guidelines on tuberculosis. Module 4: drug-  
40 susceptible tuberculosis treatment. Geneva: World Health Organization, 2022.  
41  
42
- 43 16. Enane LA, Eby J, Arscott-Mills T, et al. TB and TB-HIV care for adolescents and young  
44 adults. *Int J Tuberc Lung Dis* 2020;24(2):240-49. doi: 10.5588/ijtld.19.0416 [published  
45 Online First: 2020/03/05]  
46  
47
- 48 17. Laycock KM, Eby J, Arscott-Mills T, et al. Towards quality adolescent-friendly services in TB  
49 care. *Int J Tuberc Lung Dis* 2021;25(7):579-83. doi: 10.5588/ijtld.21.0059 [published  
50 Online First: 2021/06/30]  
51
- 52 18. Moscibrodzki P, Enane LA, Hoddinott G, et al. The Impact of Tuberculosis on the Well-Being  
53 of Adolescents and Young Adults. *Pathogens* 2021;10(12) doi:  
54 10.3390/pathogens10121591 [published Online First: 2021/12/29]  
55  
56  
57  
58  
59

- 1  
2  
3 19. Snow KJ, Cruz AT, Seddon JA, et al. Adolescent tuberculosis. *Lancet Child Adolesc Health*  
4 2020;4(1):68-79. doi: 10.1016/S2352-4642(19)30337-2 [published Online First:  
5 2019/11/23]  
6  
7
- 8 20. World Health Organization. WHO operational handbook on tuberculosis. Module 5:  
9 management of tuberculosis in children and adolescents. Geneva: World Health  
10 Organization, 2022:183-90.  
11
- 12 21. World Health Organization. WHO consolidated guidelines on tuberculosis. Module 5:  
13 management of tuberculosis in children and adolescents. Geneva: World Health  
14 Organization, 2022.  
15
- 16 22. Chiang SS, Waterous PM, Atieno VF, et al. Caring for Adolescents and Young Adults With  
17 Tuberculosis or at Risk of Tuberculosis: Consensus Statement From an International  
18 Expert Panel. *J Adolesc Health* 2023;72(3):323-31. doi:  
19 10.1016/j.jadohealth.2022.10.036 [published Online First: 2023/02/22]  
20
- 21 23. Miele K, Bamrah Morris S, Tepper NK. Tuberculosis in Pregnancy. *Obstet Gynecol*  
22 2020;135(6):1444-53. doi: 10.1097/AOG.0000000000003890 [published Online First:  
23 2020/05/28]  
24
- 25 24. Phoswa WN, Eche S, Khaliq OP. The Association of Tuberculosis Mono-infection and  
26 Tuberculosis-Human Immunodeficiency Virus (TB-HIV) Co-infection in the Pathogenesis  
27 of Hypertensive Disorders of Pregnancy. *Curr Hypertens Rep* 2020;22(12):104. doi:  
28 10.1007/s11906-020-01114-5 [published Online First: 2020/11/08]  
29
- 30 25. Sobhy S, Babiker Z, Zamora J, et al. Maternal and perinatal mortality and morbidity  
31 associated with tuberculosis during pregnancy and the postpartum period: a systematic  
32 review and meta-analysis. *BJOG* 2017;124(5):727-33. doi: 10.1111/1471-0528.14408  
33 [published Online First: 2016/11/20]  
34
- 35 26. Sugarman J, Colvin C, Moran AC, et al. Tuberculosis in pregnancy: an estimate of the  
36 global burden of disease. *Lancet Glob Health* 2014;2(12):e710-6. doi: 10.1016/S2214-  
37 109X(14)70330-4 [published Online First: 2014/12/01]  
38
- 39 27. Nightingale R, Carlin F, Meghji J, et al. Post-TB health and wellbeing. *Int J Tuberc Lung Dis*  
40 2023;27(4):248-83. doi: 10.5588/ijtld.22.0514 [published Online First: 2023/04/11]  
41
- 42 28. Negeri ZF, Levis B, Sun Y, et al. Accuracy of the Patient Health Questionnaire-9 for  
43 screening to detect major depression: updated systematic review and individual  
44 participant data meta-analysis. *BMJ* 2021;375:n2183. doi: 10.1136/bmj.n2183 [published  
45 Online First: 2021/10/07]  
46  
47  
48  
49  
50  
51  
52  
53  
54  
55  
56  
57  
58  
59  
60

- 1  
2  
3 29. Humeniuk R, Henry-Edwards S, Ali R, et al. The Alcohol, Smoking and Substance  
4 Involvement Screening Test (ASSIST): manual for use in primary care. Geneva: World  
5 Health Organization, 2010.  
6  
7
- 8 30. Humeniuk R, Ali R, Babor TF, et al. Validation of the Alcohol, Smoking And Substance  
9 Involvement Screening Test (ASSIST). *Addiction* 2008;103(6):1039-47. doi:  
10 10.1111/j.1360-0443.2007.02114.x [published Online First: 2008/04/01]  
11  
12
- 13 31. Pasipanodya JG, Miller TL, Vecino M, et al. Using the St. George respiratory questionnaire  
14 to ascertain health quality in persons with treated pulmonary tuberculosis. *Chest*  
15 2007;132(5):1591-8. doi: 10.1378/chest.07-0755 [published Online First: 2007/09/25]  
16  
17
- 18 32. Stringer B, Lowton K, James N, et al. Capturing patient-reported and quality of life outcomes  
19 with use of shorter regimens for drug-resistant tuberculosis: mixed-methods substudy  
20 protocol, TB PRACTECAL-PRO. *BMJ Open* 2021;11(9):e043954. doi: 10.1136/bmjopen-  
21 2020-043954 [published Online First: 2021/09/08]  
22  
23
- 24 33. Harris PA, Delacqua G, Taylor R, et al. The REDCap Mobile Application: a data collection  
25 platform for research in regions or situations with internet scarcity. *JAMIA Open*  
26 2021;4(3):ooab078. doi: 10.1093/jamiaopen/ooab078 [published Online First:  
27 2021/09/17]  
28  
29
- 30 34. Harris PA, Taylor R, Thielke R, et al. Research electronic data capture (REDCap)--a  
31 metadata-driven methodology and workflow process for providing translational research  
32 informatics support. *J Biomed Inform* 2009;42(2):377-81. doi: 10.1016/j.jbi.2008.08.010  
33 [published Online First: 2008/10/22]  
34  
35
- 36 35. Lewis JT, Stephens J, Musick B, et al. The leDEA harmonist data toolkit: A data quality and  
37 data sharing solution for a global HIV research consortium. *J Biomed Inform*  
38 2022;131:104110. doi: 10.1016/j.jbi.2022.104110 [published Online First: 2022/06/10]  
39  
40
- 41 36. Stover J, Glaubius R, Kassanje R, et al. Updates to the Spectrum/AIM model for the  
42 UNAIDS 2020 HIV estimates. *J Int AIDS Soc* 2021;24 Suppl 5(Suppl 5):e25778. doi:  
43 10.1002/jia2.25778 [published Online First: 2021/09/22]  
44  
45
- 46 37. Rosenthal A, Gabrielian A, Engle E, et al. The TB Portals: an Open-Access, Web-Based  
47 Platform for Global Drug-Resistant-Tuberculosis Data Sharing and Analysis. *J Clin*  
48 *Microbiol* 2017;55(11):3267-82. doi: 10.1128/JCM.01013-17 [published Online First:  
49 2017/09/15]  
50  
51
- 52 38. World Health Organization. Meeting report of the WHO expert consultation on drug-resistant  
53 tuberculosis treatment outcome definitions, 17-19 November 2020. Geneva, 2021.  
54  
55  
56  
57  
58  
59  
60

- 1  
2  
3 39. Allwood BW, van der Zalm MM, Amaral AFS, et al. Post-tuberculosis lung health:  
4 perspectives from the First International Symposium. *Int J Tuberc Lung Dis*  
5 2020;24(8):820-28. doi: 10.5588/ijtld.20.0067 [published Online First: 2020/09/12]  
6  
7  
8 40. International epidemiology Databases to Evaluate AIDS (IeDEA). Multiregional research  
9 SOPs, templates: International epidemiology Databases to Evaluate AIDS (IeDEA);  
10 2022 [Available from: [https://www.iedea.org/resources/multiregional-research-sops-  
11 templates/](https://www.iedea.org/resources/multiregional-research-sops-templates/) accessed June 8 2023.  
12  
13  
14 41. NIAID Tuberculosis Research Strategic Plan Working Group. NIAID Strategic Plan for  
15 Tuberculosis Research: National Institute of Allergy and Infectious Diseases, 2018.  
16  
17 42. Snow KJ, Sismanidis C, Denholm J, et al. The incidence of tuberculosis among adolescents  
18 and young adults: a global estimate. *Eur Respir J* 2018;51(2) doi:  
19 10.1183/13993003.02352-2017 [published Online First: 2018/02/23]  
20  
21  
22 43. Cunningham FG. Williams Obstetrics. Twenty-sixth edition ed: McGraw Hill 2022.  
23  
24 44. Hall E. Scientific view of low-level radiation risks. *Radiographics* 1991;11(509)  
25  
26 45. National Council on Radiation Protection and Measurements. Medical radiation exposure of  
27 pregnant and potentially pregnant women. Bethesda, MD: National Council on Radiation  
28 Protection and Measurements, 1977.  
29  
30 46. MapChart: MapChart; 2023 [cited 2023 August 3]. Available from: <https://www.mapchart.net>  
31 accessed August 3 2023.  
32  
33  
34  
35  
36  
37  
38  
39  
40  
41  
42  
43  
44  
45  
46  
47  
48  
49  
50  
51  
52  
53  
54  
55  
56  
57  
58  
59  
60

1  
2  
3  
4  
5  
6  
7  
8  
9  
10  
11  
12  
13  
14  
15  
16  
17  
18  
19  
20  
21  
22  
23  
24  
25  
26  
27  
28  
29  
30  
31  
32  
33  
34  
35  
36  
37  
38  
39  
40  
41  
42  
43  
44  
45  
46  
47

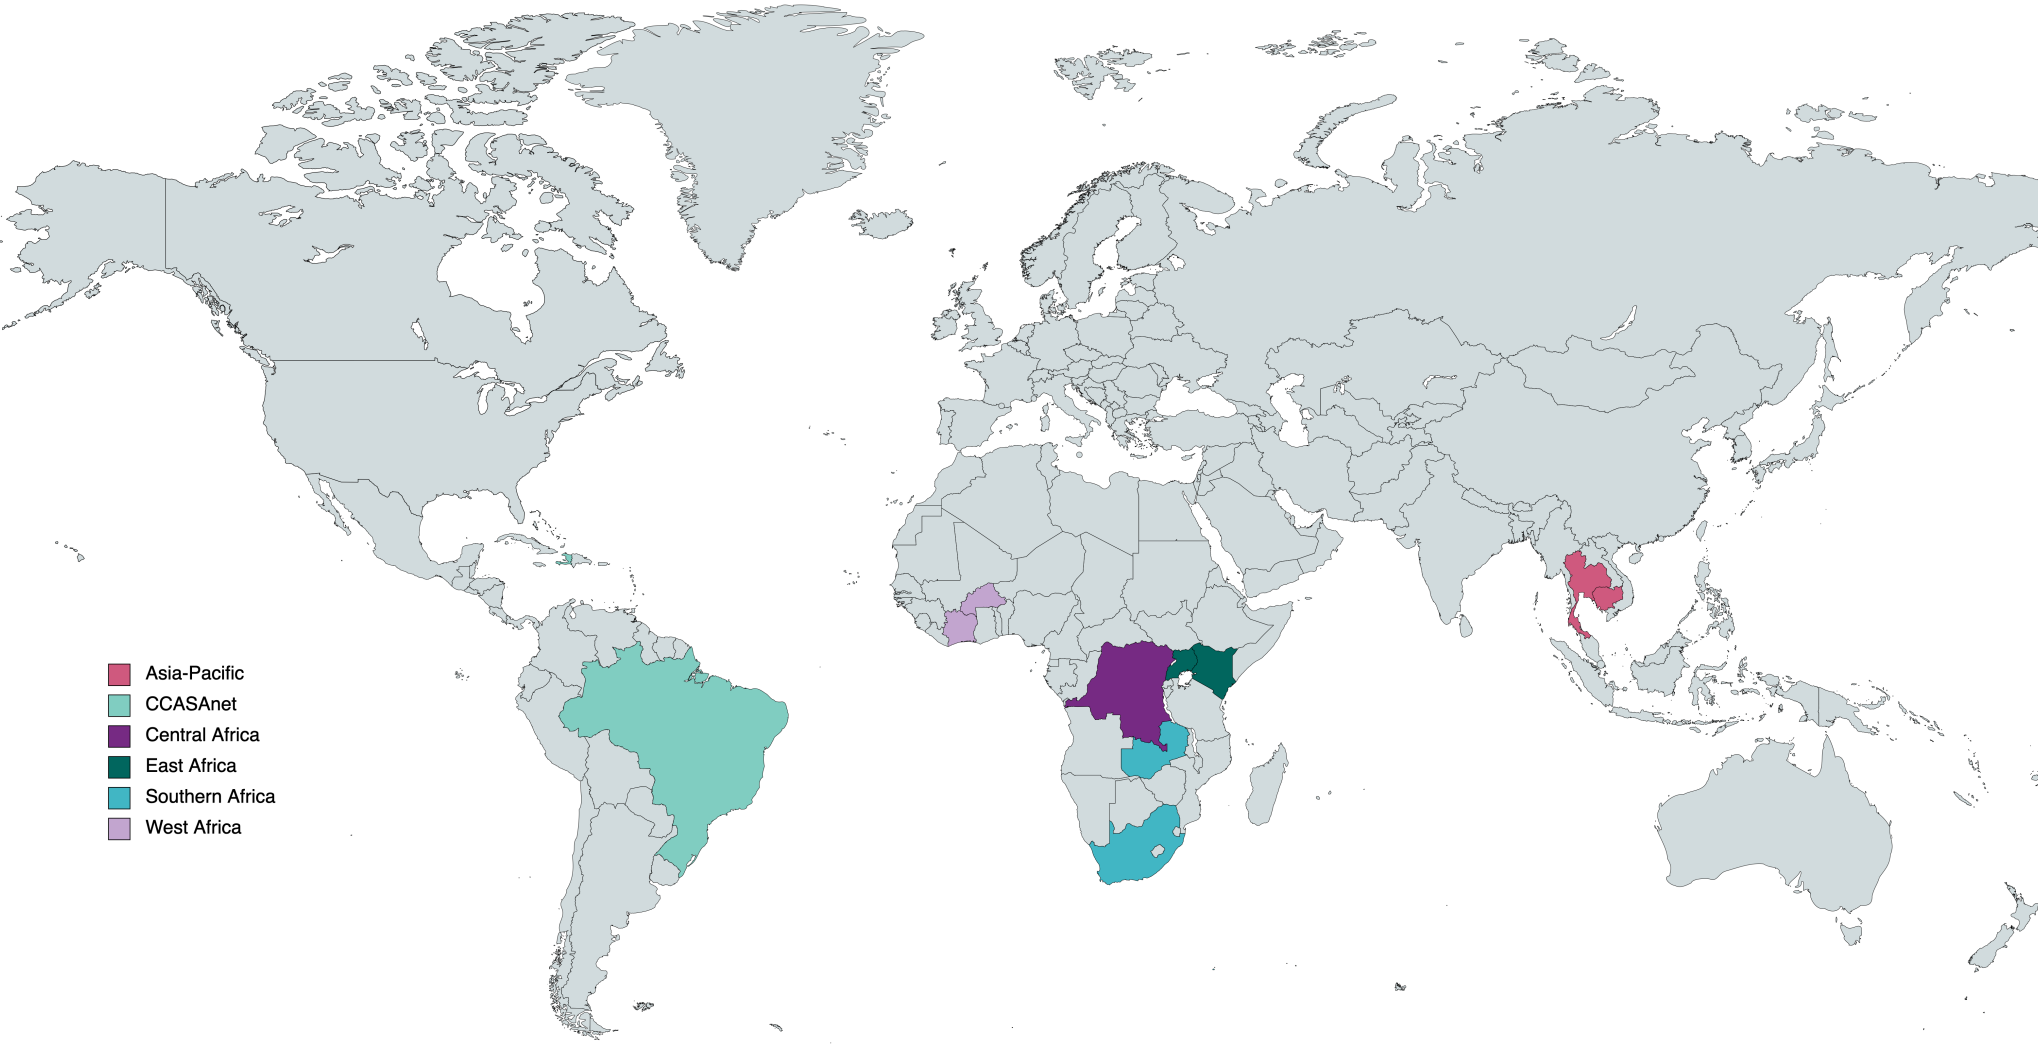

- Asia-Pacific
- CCASAnet
- Central Africa
- East Africa
- Southern Africa
- West Africa

# BMJ Open

## The Tuberculosis Sentinel Research Network (TB-SRN) of the International epidemiology Databases to Evaluate AIDS (IeDEA): protocol for a prospective cohort study in Africa, Southeast Asia, and Latin America

|                               |                                                                                                                                                                                                                                                                                                                                                                                                                                                                                                                                                                                                                                                                                                                                                                                                                                                                                                                                                                                                                                                                                                                                                                                                                                                                                                                                                                                                                                                                                                                                                                                                                                                                                                                                                                                                                                                                                                                                                                                    |
|-------------------------------|------------------------------------------------------------------------------------------------------------------------------------------------------------------------------------------------------------------------------------------------------------------------------------------------------------------------------------------------------------------------------------------------------------------------------------------------------------------------------------------------------------------------------------------------------------------------------------------------------------------------------------------------------------------------------------------------------------------------------------------------------------------------------------------------------------------------------------------------------------------------------------------------------------------------------------------------------------------------------------------------------------------------------------------------------------------------------------------------------------------------------------------------------------------------------------------------------------------------------------------------------------------------------------------------------------------------------------------------------------------------------------------------------------------------------------------------------------------------------------------------------------------------------------------------------------------------------------------------------------------------------------------------------------------------------------------------------------------------------------------------------------------------------------------------------------------------------------------------------------------------------------------------------------------------------------------------------------------------------------|
| Journal:                      | <i>BMJ Open</i>                                                                                                                                                                                                                                                                                                                                                                                                                                                                                                                                                                                                                                                                                                                                                                                                                                                                                                                                                                                                                                                                                                                                                                                                                                                                                                                                                                                                                                                                                                                                                                                                                                                                                                                                                                                                                                                                                                                                                                    |
| Manuscript ID                 | bmjopen-2023-079138.R1                                                                                                                                                                                                                                                                                                                                                                                                                                                                                                                                                                                                                                                                                                                                                                                                                                                                                                                                                                                                                                                                                                                                                                                                                                                                                                                                                                                                                                                                                                                                                                                                                                                                                                                                                                                                                                                                                                                                                             |
| Article Type:                 | Protocol                                                                                                                                                                                                                                                                                                                                                                                                                                                                                                                                                                                                                                                                                                                                                                                                                                                                                                                                                                                                                                                                                                                                                                                                                                                                                                                                                                                                                                                                                                                                                                                                                                                                                                                                                                                                                                                                                                                                                                           |
| Date Submitted by the Author: | 03-Nov-2023                                                                                                                                                                                                                                                                                                                                                                                                                                                                                                                                                                                                                                                                                                                                                                                                                                                                                                                                                                                                                                                                                                                                                                                                                                                                                                                                                                                                                                                                                                                                                                                                                                                                                                                                                                                                                                                                                                                                                                        |
| Complete List of Authors:     | <p>Enane, Leslie; Indiana University School of Medicine, Department of Pediatrics; Indiana University Center for Global Health Equity<br/> Duda, Stephany N.; Vanderbilt University School of Medicine, Department of Biomedical Informatics<br/> Chanyachukul, Thida; TREAT Asia/amfAR – The Foundation for AIDS Research<br/> Bolton-Moore, Carolyn; The University of Alabama System, Navuluri, Neelima; Duke University School of Medicine, Department of Medicine<br/> Messou, Eugène; CePreF, ACONDA, Abidjan<br/> Mbonze, Nana; Université Protestante du Congo<br/> McDade, LaQuita R.; Vanderbilt University Medical Center<br/> Figueiredo, Marina Cruvinel; Vanderbilt University School of Medicine<br/> Ross, J; –The Foundation for AIDS Research<br/> Evans, Denise; Faculty of Health Sciences University of the Witwatersrand<br/> Diero, Lameck; Moi University College of Health Sciences, Department of Medicine<br/> Akpata, Robert; Université de Bordeaux<br/> Zotova, Natalia; Albert Einstein College of Medicine, Department of Medicine<br/> Freeman, Aimee; Johns Hopkins Bloomberg School of Public Health<br/> Pierre, Marie Flore; Haitian Group for the Study of Kaposi’s Sarcoma and Opportunistic Infections<br/> Rupasinghe, Dhanushi; UNSW<br/> Ballif, Marie; University of Bern; University of Bern, Department of Infectious Diseases<br/> Byakwaga, Helen; Mbarara University of Science and Technology Faculty of Medicine, Community Health<br/> de Castro, Nathalie; Université de Bordeaux<br/> Tabala, Martine; Université de Kishasa<br/> Sterling, Timothy; Vanderbilt University Medical Center<br/> Sohn, Annette; TREAT Asia<br/> Fenner, Lukas; University of Bern<br/> Wools-Kaloustian, Kara; Indiana University School of Medicine<br/> Poda, Armel; Centre Hospitalier Universitaire Sourô Sanou<br/> Yotebieng, Marcel ; Einstein/Montefiore Department of Medicine<br/> Huebner, Robin; National Institutes of Health</p> |

1  
2  
3  
4  
5  
6  
7  
8  
9  
10  
11  
12  
13  
14  
15  
16  
17  
18  
19  
20  
21  
22  
23  
24  
25  
26  
27  
28  
29  
30  
31  
32  
33  
34  
35  
36  
37  
38  
39  
40  
41  
42  
43  
44  
45  
46  
47  
48  
49  
50  
51  
52  
53  
54  
55  
56  
57  
58  
59  
60

|                                                    |                                                                                           |
|----------------------------------------------------|-------------------------------------------------------------------------------------------|
|                                                    | Marcy, Olivier; UMR 1219                                                                  |
| <b>&lt;b&gt;Primary Subject Heading&lt;/b&gt;:</b> | Epidemiology                                                                              |
| Secondary Subject Heading:                         | HIV/AIDS, Infectious diseases, Global health                                              |
| Keywords:                                          | Tuberculosis < INFECTIOUS DISEASES, HIV & AIDS < INFECTIOUS DISEASES, Observational Study |
|                                                    |                                                                                           |

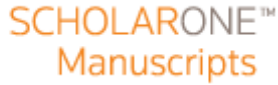

# The Tuberculosis Sentinel Research Network (TB-SRN) of the International epidemiology Databases to Evaluate AIDS (IeDEA): protocol for a prospective cohort study in Africa, Southeast Asia, and Latin America

Leslie A. Enane<sup>1,2§</sup>, Stephany N. Duda<sup>3</sup>, Thida Chanyachukul<sup>4</sup>, Carolyn Bolton<sup>5</sup>, Neelima Navuluri<sup>6,7</sup>, Eugène Messou<sup>8</sup>, Nana Mbonze<sup>9</sup>, LaQuita R. McDade<sup>10</sup>, Marina Cruvinel Figueiredo<sup>11</sup>, Jeremy Ross<sup>4</sup>, Denise Evans<sup>12</sup>, Lameck Diero<sup>13</sup>, Robert Akpata<sup>14</sup>, Natalia Zotova<sup>15</sup>, Aimee Freeman<sup>16</sup>, Marie Flore Pierre<sup>17</sup>, Dhanushi Rupasinghe<sup>18</sup>, Marie Ballif<sup>19,20</sup>, Helen Byakwaga<sup>21</sup>, Nathalie de Castro<sup>14</sup>, Martine Tabala<sup>9</sup>, Timothy R. Sterling<sup>11</sup>, Annette H. Sohn<sup>4</sup>, Lukas Fenner<sup>19</sup>, Kara Wools-Kaloustian<sup>2,22</sup>, Arnel Poda<sup>23</sup>, Marcel Yotebieng<sup>15</sup>, Robin Huebner<sup>24</sup>, and Olivier Marcy<sup>14</sup>, on behalf of the International epidemiology Databases to Evaluate AIDS

1 The Ryan White Center for Pediatric Infectious Diseases and Global Health, Department of Pediatrics, Indiana University School of Medicine, Indianapolis, Indiana, United States of America

2 Indiana University Center for Global Health Equity, Indianapolis, Indiana, United States of America

3 Department of Biomedical Informatics, Vanderbilt University School of Medicine, Nashville, Tennessee, United States of America

4 TREAT Asia/amfAR – The Foundation for AIDS Research, Bangkok, Thailand

5 Center for Infectious Disease Research in Zambia (CIDRZ), Lusaka, Zambia

6 Division of Pulmonary, Allergy, and Critical Care Medicine, Department of Medicine, Duke University School of Medicine, Durham, North Carolina, United States of America

7 Duke Global Health Institute, Duke University, Durham, North Carolina, United States of America

8 Centre de Prise en Charge de Recherche et de Formation (Aconda-CePReF), Abidjan, Côte d'Ivoire

9 Kinshasa School of Public Health, University of Kinshasa, Kinshasa, Democratic Republic of the Congo

10 Vanderbilt Institute of Clinical and Translational Research, Vanderbilt University Medical Center, Nashville, Tennessee, United States of America

11 Vanderbilt Tuberculosis Center, Division of Infectious Diseases, Vanderbilt University School of Medicine, Nashville, Tennessee, United States of America

12 Health Economics and Epidemiology Research Office, Faculty of Health Sciences, University of the Witwatersrand, Johannesburg, South Africa

13 Department of Medicine, Moi University College of Health Sciences, Eldoret, Kenya



- 1  
2  
3 14 Université de Bordeaux, Bordeaux, France  
4 15 Division of General Internal Medicine, Department of Medicine, Albert Einstein College of Medicine,  
5 The Bronx, New York, United States of America  
6  
7 16 Johns Hopkins Bloomberg School of Public Health, Baltimore, Maryland, United States of America  
8  
9 17 The Haitian Group for the Study of Kaposi's Sarcoma and Opportunistic Infections (GHESKIO), Port-  
10 au-Prince, Haiti  
11  
12 18 The Kirby Institute, UNSW, Sydney, Australia  
13  
14 19 Institute of Social and Preventive Medicine, University of Bern, Bern, Switzerland  
15  
16 20 Department of Infectious Diseases, Bern University Hospital and University of Bern, Bern,  
17 Switzerland  
18  
19 21 Mbarara University of Science and Technology, Mbarara, Uganda  
20  
21 22 Division of Infectious Diseases, Department of Medicine, Indiana University School of Medicine,  
22 Indianapolis, Indiana, United States of America  
23  
24 23 Centre Hospitalier Universitaire Sourô Sanou, Bobo-Dioulasso, Burkina Faso  
25  
26 24 Division of AIDS, National Institute of Allergy and Infectious Diseases, National Institutes of Health,  
27 Bethesda, Maryland, United States of America

28 § Corresponding author: Leslie A. Enane, MD MSc. 705 Riley Hospital Drive, Suite 5900. Indianapolis,  
29 Indiana, 46202, USA. Tel: +1-317-944-7260. E-mail: [lenane@iu.edu](mailto:lenane@iu.edu).

30  
31  
32  
33 Key words: tuberculosis; HIV/AIDS; treatment outcomes; post-TB lung disease; observational cohort.  
34  
35  
36  
37  
38  
39  
40  
41  
42  
43  
44  
45  
46  
47  
48  
49  
50  
51  
52  
53  
54  
55  
56  
57  
58  
59  
60

## ABSTRACT

**Introduction:** Tuberculosis (TB) is a leading infectious cause of death globally. It is the most common opportunistic infection in people living with HIV (PLHIV), and the most common cause of their morbidity and mortality. Following TB treatment, surviving individuals may be at risk for post-TB lung disease (PTLD). The Tuberculosis Sentinel Research Network (TB-SRN) provides a platform for coordinated observational TB research within the International epidemiology Databases to Evaluate AIDS (IeDEA) consortium.

**Methods and Analysis:** This prospective, observational cohort study will assess treatment and post-treatment outcomes of pulmonary TB (microbiologically confirmed or clinically diagnosed) among 2,600 people aged  $\geq 15$  years, with and without HIV co-infection, consecutively enrolled at 16 sites in 11 countries, across six of IeDEA's global regions. Data regarding clinical and sociodemographic factors, mental health, health-related quality of life, pulmonary function, and laboratory and radiographic findings will be collected using standardized questionnaires and data collection tools, beginning from the initiation of TB treatment and through 12 months after the end of treatment. Data will be aggregated for proposed analyses.

**Ethics and Dissemination:** Ethics approval was obtained at all implementing study sites, including the Vanderbilt University Medical Center Human Research Protections Program. Participants will provide informed consent; for minors, this includes both adolescent assent and the consent of their parent or primary caregiver. Protections for vulnerable groups are included, in alignment with local standards and considerations at sites. Procedures for requesting use and analysis of TB-SRN data are publicly available. Findings from TB-SRN analyses will be shared with national TB programs to inform TB programming and policy, and disseminated at regional and global conferences and other venues.

## Strengths and limitations of this study

Strengths of this study include:

- Use of a diverse, global cohort of individuals with and without HIV to study pulmonary TB treatment and post-treatment outcomes, with harmonization of procedures and variables across 16 sites in 11 countries, across six global leDEA regions.
- Comprehensive data collection, including sociodemographic, clinical, mental health, respiratory quality of life, spirometry, laboratory, and radiographic data, across the TB treatment and post-treatment time periods.
- Research follow-up through 12 months after the end of TB treatment, enabling investigations of longer-term outcomes after TB treatment, and correlation with factors ascertained at TB treatment initiation or during treatment.
- An inclusive approach informing real-world contexts of TB treatment. Specifically, this study includes both clinically diagnosed and microbiologically confirmed TB, and includes specific data collection and procedures for youth (ages 15-24) and for pregnant and post-partum participants.

Limitations of this study include:

- Some variations by region in TB management, available treatment support, and access to testing for diagnosis and monitoring (e.g., TB cultures). These will be noted and accounted for in planned analyses.

## INTRODUCTION

Before the onset of the coronavirus disease (COVID-19) pandemic, tuberculosis (TB) was the leading infectious cause of death globally by a single pathogen.<sup>(1)</sup> The COVID-19 pandemic has disrupted TB and HIV services, with attendant challenges for optimal diagnosis, control, and care management.<sup>(1-4)</sup> In the years since the onset of the COVID-19 pandemic, global estimates of TB disease, drug-resistant TB, and TB deaths have increased for the first time in many years.<sup>(1-3)</sup> In 2021, an estimated 10.6 million people developed TB disease and 1.6 million people died from TB.<sup>(1)</sup> Further—despite increasing global access to antiretroviral treatment (ART) and to TB preventive therapy (TPT) among people living with HIV (PLHIV)—TB remains the leading cause of morbidity and mortality among PLHIV.<sup>(5-7)</sup> In this context, data are urgently needed to inform global strategies to address the dual TB and HIV epidemics.

Critical evidence gaps exist with regard to drivers of unfavorable TB treatment outcomes, such as mortality, TB recurrence, and post-treatment sequelae/complications, including among PLHIV.<sup>(5, 8, 9)</sup> Addressing these gaps is particularly critical in light of recent acceleration towards shorter TB treatment regimens for both drug-susceptible and drug-resistant TB, and given the prospect of possible individualized approaches to treat both TB and post-TB lung disease (PTLD).<sup>(10)</sup> Key areas of ongoing research gaps relate to TB-HIV co-infection, treatment, and associated complications; consequences of drug-resistant TB; pulmonary complications and post-treatment outcomes; the impacts of psychosocial and life course factors on TB outcomes; and mental health outcomes of TB. A global prospective cohort of individuals with TB and with TB-HIV coinfection enables harmonized data collection and procedures to inform questions in these key areas.

The International epidemiology Databases to Evaluate AIDS (IeDEA) global research consortium—established by the US National Institutes of Health in 2006—collects and analyzes observational data in a clinical cohort of over 2.2 million people living with or affected by HIV, in 44 countries.<sup>(11)</sup> Data are organized by seven geographic regions, and coordinated by regional data centers.<sup>(11)</sup> IeDEA provides diverse global data from HIV treatment programs. The Tuberculosis Sentinel Research Network (TB-SRN) is a global platform for coordinated observational TB research within the IeDEA consortium, which receives funding from multiple institutes and centers within the US National Institutes of Health (NIH). The TB-SRN working group of IeDEA developed an observational cohort study protocol. To facilitate possible pooled global analyses, protocol development was based in part on the framework and original protocol

of the Regional Prospective Observational Research in Tuberculosis (RePORT) International Consortium.(12-14) The TB-SRN uses a common set of standards and definitions for prospective observational TB research. These were developed in alignment with the study concepts and measurement timepoints defined by RePORT International.(12-14) The TB-SRN will facilitate the use of pooled data to study pulmonary TB treatment and post-treatment outcomes among people with and without HIV at TB-SRN sites in six of leDEA's global regions. The resulting findings and study infrastructure may be used to inform policy and practice regarding TB treatment, and create a platform for additional regional and multiregional TB research within leDEA.

## METHODS AND ANALYSIS

### Objectives of the leDEA TB Sentinel Research Network

With its focus on HIV and associated co-infections and comorbidities, the global leDEA research consortium is ideally positioned to study TB outcomes among people with and without HIV. To accomplish this, the TB-SRN will study outcomes of people diagnosed with pulmonary TB through a network of 16 sentinel sites (Table 1) located in 11 low- and middle-income countries (LMIC) in six leDEA regions: Asia-Pacific, CCASAnet (Caribbean, Central and South America), Central Africa, East Africa, Southern Africa, and West Africa (Figure 1).(15)

**Table 1.** Planned initial study sites in the Tuberculosis Sentinel Research Network (TB-SRN) of the International epidemiology Databases to Evaluate AIDS (leDEA), by leDEA region and target sample size.

| leDEA region | Site name                                                                                                | Sample size |
|--------------|----------------------------------------------------------------------------------------------------------|-------------|
| Asia-Pacific | National Center for HIV, AIDS, Dermatology, and STDs, Cambodia                                           | 300         |
|              | HIV Netherlands-Australia-Thailand Research Collaboration (HIV-NAT) and Chulalongkorn Hospital, Thailand |             |
|              | Chiangrai Prachanukroh Hospital, Chiang Rai, Thailand                                                    |             |
| CCASAnet     | GHESKIO, Haiti                                                                                           | 100         |
|              | Instituto Nacional de Infectologia, Fiocruz-RJ, Brazil                                                   | 250         |
|              | Centro Municipal de Saude Duque de Caxias, Brazil                                                        | 250         |

|                 |                                                                                           |     |
|-----------------|-------------------------------------------------------------------------------------------|-----|
|                 | Instituto Brasileiro de Investigação da Tuberculose / Fiocruz-BA, Brazil                  | 250 |
|                 | Fundação de Medicina Tropical, Brazil                                                     | 250 |
| Central Africa  | Centre Hospitalier Kabinda, the Democratic Republic of the Congo                          | 300 |
|                 | Bondeko Health Center, Kinshasa, the Democratic Republic of the Congo                     |     |
| East Africa     | Academic Model Providing Access to Healthcare – Moi Teaching and Referral Hospital, Kenya | 200 |
|                 | Mbarara Regional Referral Hospital, Uganda                                                | 100 |
| Southern Africa | Kanyama and Chawama at CIDRZ, Lusaka, Zambia                                              | 150 |
|                 | Themba Lethu, Johannesburg, South Africa                                                  | 150 |
| West Africa     | CePReF, Abidjan, Côte d'Ivoire                                                            | 100 |
|                 | Centre Hospitalier Universitaire Sourou Sanon, Bobo Dioulasso, Burkina Faso               | 200 |

Abbreviations: CCASAnet, the Caribbean, Central and South America network for HIV epidemiology; CePReF, Centre de Prise en charge, de Recherche, et de Formation; CIDRZ, Centre for Infectious Disease Research in Zambia; GHESKIO, Groupe Haïtien d'Étude du Sarcome de Kaposi et des Infections Opportunistes.

There are three specific objectives of the TB-SRN. First, the TB-SRN will collect and analyze clinical and treatment data among people treated for pulmonary TB with or without HIV co-infection, to improve our understanding of the prognosis of TB disease and its health-related outcomes, including quality of life and survival. Second, the TB-SRN will assess the individual-level effects of HIV and antiretroviral therapy (ART) on TB symptomatology, diagnosis, treatment response, and survival. As part of this aim, investigators will also explore the effect of site-level TB and HIV management and integration of TB and HIV services on pulmonary TB treatment and longer-term outcomes. Third, the TB-SRN will describe post-TB lung disease and associations with HIV infection, diabetes, chronic lung disease, mental health, and tobacco, alcohol and substance use, including measuring physiologic, structural, and functional impairment, health-related quality of life, and survival.

## Study design

The TB-SRN is a prospective, observational study, with consecutive enrollment of PLHIV and HIV-negative individuals, ages 15 and above, with clinically diagnosed or microbiologically confirmed pulmonary TB disease. Microbiologic confirmation of pulmonary TB is defined on the basis of either positive molecular diagnostic test (e.g., GeneXpert), acid-fast bacilli smear, and/or TB culture from sputum or other respiratory specimen. Microbiologic confirmation of pulmonary TB may also be based on positive urine lipoarabinomannan assay in the presence of clinical signs, symptoms and/or radiographic findings of pulmonary TB. Clinically diagnosed pulmonary TB is defined by clinical diagnosis by medical providers through standard of care, in the absence of confirmatory testing, prompting initiation of TB treatment. Specific eligibility criteria that must be met as part of clinical diagnosis include having either (1) *any* signs or symptoms of active TB (e.g., persistent cough, hemoptysis, fever, unintended weight loss, fatigue or lethargy, night sweats, pleuritic chest pain) together with chest X-ray findings consistent with pulmonary TB, or (2) presence of *respiratory* signs and symptoms (including chronic cough, hemoptysis, or pleuritic chest pain) regardless of chest X-ray findings. Individuals who consent to participate will provide clinical, laboratory, and radiographic data at study visits at specified timepoints from TB treatment initiation through 12 months after the end of treatment (Table 2).

**Table 2.** Study procedures in the Tuberculosis Sentinel Research Network (TB-SRN) of the International epidemiology Databases to Evaluate AIDS (IeDEA).

| Form                                                                                              | Treatment Phase <sup>a</sup> |          |                        |                         |                             | Post-Treatment Phase          |                                |          |
|---------------------------------------------------------------------------------------------------|------------------------------|----------|------------------------|-------------------------|-----------------------------|-------------------------------|--------------------------------|----------|
|                                                                                                   | SCREENING                    | BASELINE | MONTH 1<br>(Weeks 3-7) | MONTH 2<br>(Weeks 8-12) | End of TX<br>(-4 to +6 wks) | 6-M POST-TX<br>(-4 to +6 wks) | 12-M POST-TX<br>(-4 to +6 wks) | TX F/R/W |
| Visit                                                                                             |                              |          |                        |                         |                             |                               |                                |          |
| Informed consent (and assent, if applicable) <sup>b</sup>                                         | X                            |          |                        |                         |                             |                               |                                |          |
| Demographics<br>Including adolescent and young adult characteristics (if applicable) <sup>c</sup> |                              | X        |                        |                         |                             |                               |                                |          |
| <b>Clinical history:</b>                                                                          |                              |          |                        |                         |                             |                               |                                |          |
| • TB history and current diagnosis                                                                |                              | X        |                        |                         |                             |                               |                                | X        |
| • HIV and other medical history                                                                   |                              | X        |                        |                         |                             |                               |                                |          |
| • Pregnancy and post-partum history (female participants only)                                    |                              | X        |                        |                         | X                           | X                             | X                              | X        |
| • Pregnancy and infant outcomes (if applicable)                                                   |                              | X        |                        |                         | X                           | X                             | X                              | X        |

|                                                                                               |  |   |   |   |   |   |   |   |
|-----------------------------------------------------------------------------------------------|--|---|---|---|---|---|---|---|
| <b>Clinical evaluation</b>                                                                    |  |   |   |   |   |   |   |   |
| Visit information, vital signs including pulse oximetry, respiratory symptoms, physical signs |  | X | X | X | X | X | X | X |
| <b>Substance use</b>                                                                          |  |   |   |   |   |   |   |   |
| ASSIST and smoking history                                                                    |  | X |   |   | X |   | X | X |
| <b>Respiratory symptoms and health-related quality of life</b>                                |  |   |   |   |   |   |   |   |
| SGRQ                                                                                          |  | X |   |   | X | X | X | X |
| <b>Depression symptoms</b>                                                                    |  |   |   |   |   |   |   |   |
| PHQ-9 and suicide risk assessment                                                             |  | X |   |   | X |   | X | X |
| <b>Pulmonary testing:<sup>d</sup></b>                                                         |  |   |   |   |   |   |   |   |
| • Spirometry                                                                                  |  |   |   | X | X | X |   |   |
| • 1-minute sit-to-stand test                                                                  |  | X |   | X | X | X |   |   |
| <b>Performed if not already done as part of care:</b>                                         |  |   |   |   |   |   |   |   |
| • Chest X-ray <sup>e</sup>                                                                    |  | X |   |   | X |   |   |   |
| • CD4 count ( <i>only for participants with HIV</i> ) <sup>f</sup>                            |  | X |   |   |   |   |   | X |
| • HbA1c and random blood glucose                                                              |  | X |   |   | X |   |   |   |
| <b>Data collected from routine care, as available:</b>                                        |  |   |   |   |   |   |   |   |
| • TB microbiology                                                                             |  | X | X | X | X |   |   | X |
| • HIV testing and other lab results <sup>g</sup>                                              |  | X | X | X | X | X | X | X |
| <b>TB treatment</b>                                                                           |  |   |   |   |   |   |   |   |
| Anti-TB regimen, adherence to medications, use and type of directly observed therapy          |  | X | X | X | X |   |   | X |
| <b>Antiretroviral treatment (if applicable)</b>                                               |  |   |   |   |   |   |   |   |
| ARV regimen, adherence to medications                                                         |  | X | X | X | X | X | X | X |
| <b>Adverse events</b>                                                                         |  |   | X | X | X |   |   | X |
| <b>TB IRIS evaluation</b>                                                                     |  |   | X | X |   |   |   |   |
| <b>TB treatment outcome</b>                                                                   |  |   |   |   | X |   |   | X |
| <b>Death form (death during study, if applicable)</b>                                         |  |   |   |   |   |   |   |   |

Abbreviations: ASSIST, Alcohol, Smoking and Substance Involvement Screening Test; IRIS, immune reconstitution inflammatory syndrome; PHQ-9, Patient Health Questionnaire; SGRQ, Saint George's Respiratory Questionnaire. a, Month 1 visit is optional, and not done at all sites. Tx F/R/W, Treatment Failure, Relapse, or Withdrawal. b, Adolescent minors who turn 18 years of age during the study will be re-consented on the first visit after turning age 18. c, For all youth participants ages 15-24 on enrollment. d, For 12 sites performing pulmonary testing. e, Digitized/digitizable chest X-ray (CXR) obtained, unless done within 4 weeks prior to the Baseline or End of Treatment as per standard of care. CXRs obtained at other time points through routine care will also be digitized/uploaded. Pregnant women are not required to have a CXR; regions may vary in approach in this population according to local standards. f, CD4 count will only be performed on participants who are HIV-positive and who have not had a CD4



1  
2  
3 count performed in the preceding 3 months. g, HIV testing of participants not known to be  
4 positive collected from routine data and not as part of the study. HIV viral load (if applicable),  
5 CBC, transaminases, and TB microbiology data to be abstracted if available.  
6  
7  
8  
9

10 Most participants, if completing a standard duration of six months of TB treatment for drug-  
11 susceptible TB, will consequently be followed for a total of 18 months from TB treatment initiation.  
12 Time on study will be longer, however, if treatment duration is longer as determined by providers  
13 under standard of care. (Treatment duration may be longer than six months, for example, for  
14 some regimens for drug-resistant TB, or if treatment is interrupted, or if pulmonary disease  
15 coincides with infection at an extrapulmonary site warranting longer treatment duration.) In  
16 addition, some regions have longer follow-up periods after end of TB treatment, according to  
17 region-specific objectives. Some regions will also have data collection beyond this multiregional  
18 protocol, such as for laboratory biomarkers, pharmacokinetic data, or biological specimens. Data  
19 will be aggregated for concept-driven analyses.  
20  
21  
22  
23  
24  
25  
26

## 27 **Sample selection**

### 28 *TB-SRN Sites*

29  
30 Sixteen sites included in the TB-SRN are located in 11 countries: Brazil, Burkina Faso, Cambodia,  
31 Côte d'Ivoire, the Democratic Republic of the Congo, Haiti, Kenya, South Africa, Thailand,  
32 Uganda, and Zambia. These sites represent a range of contexts for the dual TB-HIV epidemics,  
33 including differing prevalence of TB and HIV, care models, and resources. Analyses in this study  
34 will include comparisons by site-level variables or by region.  
35  
36  
37  
38  
39  
40

### 41 *Eligibility and exclusion criteria*

42 The leDEA TB-SRN will enroll participants ages 15 and older with clinically diagnosed or  
43 microbiologically confirmed active pulmonary TB who are initiating TB treatment at leDEA TB-  
44 SRN sites. Participants must have either documentation of recent HIV testing or of HIV infection  
45 or willingness to be tested for HIV, as routinely indicated under TB treatment guidelines.<sup>(16)</sup>  
46 Informed consent will be required for all participants; including parental/caregiver consent and  
47 minor assent for individuals younger than age 18 (or the legal age of majority). There will be no  
48 restrictions based on sex, gender identity, HIV status, pregnancy, ethnicity, or nationality.  
49 Participants may be co-enrolled in other research with the exception of clinical trials of novel TB  
50 treatment regimens.  
51  
52  
53  
54  
55  
56  
57  
58  
59  
60

1  
2  
3 An individual will be excluded if they meet any of the following criteria: have received >7  
4 days of TB treatment within the prior 30 days, excluding TB preventive therapy; have imminent  
5 plans to follow-up for TB care or relocate/return to a site distant from the enrollment site, which  
6 would interfere with the participant's ability to complete all study visits; have substantial cognitive  
7 impairment that may interfere with the ability to give reliable informed consent; are currently  
8 imprisoned.  
9  
10  
11

12  
13 Enrollment began in September 2022 and is projected to continue through October 2024.  
14 Data collection is ongoing with a projected end date of April 2026.  
15  
16

### 17 18 *Participant considerations*

19  
20 The inclusion of participants with and without HIV will facilitate analyses in which HIV status is  
21 evaluated as a factor potentially contributing to TB treatment or post-treatment outcomes. The  
22 proportion of participants with HIV co-infection is anticipated to vary across sites.  
23  
24

25 The inclusion of participants ages 15 and above will allow for dedicated analyses of  
26 participants in the 15–24-year-old age group of youth with TB. While youth have specific needs  
27 that must be addressed in quality health services, TB programs globally have not adopted youth-  
28 centered care models.(17-20) Further, adolescents and youth have been neglected in TB  
29 research, either by failure to include individuals younger than age 18, or by not examining  
30 research data within stratified adolescent or young adult age groups.(19, 20) Guidance from the  
31 WHO now advises that youth and their specific needs should be included in global TB research  
32 and care efforts.(21-23) This study will assess clinical characteristics, TB outcomes, and post-  
33 treatment outcomes in a sub-cohort of youth with TB across 5-year age strata (i.e., older  
34 adolescents aged 15-19 and young adults aged 20-24 years).  
35  
36  
37  
38  
39  
40

41 TB during pregnancy can cause poor outcomes for both the mother and for the developing  
42 fetus (or infant, after delivery), including maternal complications, miscarriage, preterm birth, low  
43 birthweight, or perinatal death.(24-27) Existing data regarding clinical features and outcomes of  
44 TB in pregnancy are very limited. Pregnant and post-partum individuals with TB (who have been  
45 pregnant within the last 12 months) will be included in TB-SRN. Data collection will include specific  
46 variables related to pregnancy, receipt of TB and HIV medications during pregnancy, and  
47 maternal and infant outcomes. These will be collected over the course of the study period,  
48 including for individuals who become pregnant or give birth during the study.  
49  
50  
51  
52  
53  
54

### 55 **Patient and public involvement**

56  
57  
58  
59  
60

1  
2  
3 Key research questions of this study were informed by previous participatory research and  
4 advocacy from individuals with TB; in particular, calling for research in post-TB lung disease and  
5 other post-treatment outcomes,(28) and for inclusion of adolescent minors in research.(23)  
6 Individuals with TB were not involved in the study's design. Draft case report forms (CRFs) were  
7 revised through iterative rounds of review and preliminary piloting at the study sites. In particular,  
8 clinical programs at the sites were involved in revisions at this stage to ensure the feasibility of  
9 CRFs and to minimize burdens on individuals with TB participating in the study. Clinical programs  
10 at the sites were also consulted related to study planning. This included preparations for referral  
11 for immediate and urgent health needs, such as for symptoms of depression and suicidal thinking  
12 (assessed by PHQ-9 and suicide risk assessment). Findings from this research will be shared  
13 with national TB programs and HIV treatment programs at the study sites, and disseminated to  
14 individuals with TB.  
15  
16  
17  
18  
19  
20  
21  
22  
23

### 24 **Assessments and data collection**

25 Data (e.g., chest X-rays, laboratory results, health-related outcome measures; Table 2) will be  
26 collected according to a common schedule and methodology across sites, so that they can be  
27 harmonized and aggregated for analysis.  
28  
29

30 Participants who consent to the study will be followed during TB treatment and for 12  
31 months after the end of their primary treatment course (i.e., the treatment course initiated at study  
32 enrollment). For most participants, this will be approximately 18 months after provisional  
33 enrollment/treatment start if they have drug-susceptible TB and receive a 6-month TB treatment  
34 regimen, but it may be longer if they have drug-resistant TB or require a longer treatment regimen  
35 for other reasons (e.g., if there is associated extrapulmonary TB disease). At the time of this study,  
36 TB programs at the study sites are primarily using treatment regimens of 6 months' duration as  
37 routine standard for drug-susceptible pulmonary TB.  
38  
39  
40  
41  
42

43 Participants will be requested to provide data during visits at key timepoints: at baseline  
44 (at initiation of TB treatment), month 1 (optional; performed at some but not all sites), month 2,  
45 end of TB treatment, 6 months post-treatment, 12 months post-treatment, and at the time of  
46 suspected or apparent treatment failure, TB recurrence, or study withdrawal if it occurs during  
47 treatment or the 12-month post-treatment follow-up phase. The baseline visit will include detailed  
48 clinical history, including course of TB symptoms and diagnosis, previous TB, HIV diagnosis and  
49 treatment (as applicable), history regarding recent or current pregnancy, and history regarding  
50 non-communicable co-morbidities and their treatment (e.g., diabetes mellitus, hypertension,  
51 pulmonary or cardiovascular disease, cancer, immune suppression, mental health diagnoses).  
52  
53  
54  
55  
56  
57  
58  
59  
60

1  
2  
3 HIV and TB clinical data will be extracted from medical records and TB registers, while current  
4 symptoms, pregnancy history, and history of other conditions will be collected via patient  
5 interview. Sociodemographic information will be collected including specific information relevant  
6 to youth ages 15-24 at enrollment (e.g., orphan status, caregiver characteristics, school  
7 attendance). Data collected at multiple visits during the study will include TB symptoms;  
8 ascertainment of immune reconstitution inflammatory syndrome (IRIS), TB treatment failure, or  
9 TB recurrence; clinical, radiographic and microbiologic data related to TB; assessments for  
10 symptoms of depression (by the Patient Health Questionnaire; PHQ-9)(29) and substance use  
11 (by the Alcohol, Smoking, and Substance Involvement Screening Test; ASSIST);(30, 31) and  
12 pulmonary investigations including repeated pulse oximetry, spirometry, functional test (1-minute  
13 sit-to-stand test), and respiratory symptoms and health-related quality of life (by the Saint  
14 George's Respiratory Questionnaire; SGRQ).(32, 33) These validated questionnaires have been  
15 used previously in the respective regions, with adaptations as appropriate (e.g., PHQ-9, ASSIST,  
16 SGRQ).

17  
18  
19  
20  
21  
22  
23  
24  
25  
26  
27  
28  
29  
30  
31  
32  
33  
34  
35  
36  
37  
38  
39  
40  
41  
42  
43  
44  
45  
46  
47  
48  
49  
50  
51  
52  
53  
54  
55  
56  
57  
58  
59  
60  
Data will be collected on paper or electronic CRFs according to local capacity and regulatory requirements. A copy of the paper CRFs is provided (Supplementary Materials 1). Paper forms will be subsequently entered into the electronic system by trained personnel. All sites will use the secure, web-based REDCap data collection platform and/or the REDCap Mobile App for data collection.(34, 35) Common data management processes and procedures will be developed in collaboration with the Harmonist team at Vanderbilt University Medical Center, which provides informatics resources for leDEA.(36, 37) For sites using film-based chest X-rays, films will be scanned and digitized using standard procedures defined by the NIH TB Portals platform.(38)

40  
41  
42  
43  
44  
45  
46  
47  
48  
49  
50  
51  
52  
53  
54  
55  
56  
57  
58  
59  
60  
Sites will work with the leDEA regional data centers to enter, prepare, and clean data using either the Vanderbilt REDCap server or a regional REDCap server to adhere to country regulations on research data storage. All sites will use the same REDCap project template to ensure variables and study events use the same names and code lists to facilitate subsequent data merging. Research staff will administer questionnaires using relevant local translations (in Bemba, French, Haitian Creole, Khmer, Lingala, Nyanja, Portuguese, Runyankole, Swahili, and Thai) and adaptations as appropriate, implemented in paper CRFs and in the REDCap data collection platform. Regional data centers will conduct quality control or assurance activities for their sites based on guidance developed by the TB-SRN study team and the Harmonist team.(36, 37)

### Outcome measures

Multiple outcomes will be assessed in the TB-SRN (Table 3). These include TB treatment outcomes; TB recurrence; mortality; other pulmonary, health-related quality of life, and mental health outcomes.

**Table 3.** Select study outcomes in the Tuberculosis Sentinel Research Network (TB-SRN) of the International epidemiology Databases to Evaluate AIDS (IeDEA).

| Outcome                         | Definition                                                                                                                                                                                                                                                                                                                                                                                                                                                                                                                                                                                                                                                                                                                                                                                                                                                                                                                                                                 |
|---------------------------------|----------------------------------------------------------------------------------------------------------------------------------------------------------------------------------------------------------------------------------------------------------------------------------------------------------------------------------------------------------------------------------------------------------------------------------------------------------------------------------------------------------------------------------------------------------------------------------------------------------------------------------------------------------------------------------------------------------------------------------------------------------------------------------------------------------------------------------------------------------------------------------------------------------------------------------------------------------------------------|
| TB treatment outcomes(39)       | As defined by WHO:(39) <ul style="list-style-type: none"> <li>• Treatment failed: A patient whose treatment regimen needed to be terminated or permanently changed to a new regimen or treatment strategy.</li> <li>• Cured: A pulmonary TB patient with bacteriologically confirmed TB at the beginning of treatment who completed treatment as recommended by the national policy, with evidence of bacteriological response and no evidence of failure.</li> <li>• Treatment completed: A patient who completed treatment as recommended by the national policy, whose outcome does not meet the definition for cure or treatment failure.</li> <li>• Died: A patient who died before starting treatment or during the course of treatment.</li> <li>• Lost to follow-up: A patient who did not start treatment or whose treatment was interrupted for 2 consecutive months or more.</li> <li>• Treatment success: The sum of cured and treatment completed.</li> </ul> |
| TB recurrence(40)               | Any new TB diagnosis after TB treatment completion or cure(40)                                                                                                                                                                                                                                                                                                                                                                                                                                                                                                                                                                                                                                                                                                                                                                                                                                                                                                             |
| Post-TB Mortality               | Death from any cause after end of TB treatment <sup>a</sup>                                                                                                                                                                                                                                                                                                                                                                                                                                                                                                                                                                                                                                                                                                                                                                                                                                                                                                                |
| Sustained treatment success(39) | An individual assessed at 6 months (for DR-TB and DS-TB) and at 12 months (for DR-TB only) after successful TB treatment, who is alive and free of TB.(39)                                                                                                                                                                                                                                                                                                                                                                                                                                                                                                                                                                                                                                                                                                                                                                                                                 |

|                                |                                                                                                                                                                                                                                                                                                                                                                                                                                                                                                                                                                                                                                                                                                                                                                                                                                                                                 |
|--------------------------------|---------------------------------------------------------------------------------------------------------------------------------------------------------------------------------------------------------------------------------------------------------------------------------------------------------------------------------------------------------------------------------------------------------------------------------------------------------------------------------------------------------------------------------------------------------------------------------------------------------------------------------------------------------------------------------------------------------------------------------------------------------------------------------------------------------------------------------------------------------------------------------|
| Post-TB lung disease (PTLD)    | <p>Characterized by any of the following, after completion of TB treatment and in the absence of TB recurrence:(41)</p> <ul style="list-style-type: none"> <li>• Symptoms (new / recurrent / persistent from end of treatment) <ul style="list-style-type: none"> <li>○ Respiratory distress, cough, dyspnea/shortness of breath, hemoptysis, chest pain</li> </ul> </li> <li>• Signs (new / recurrent / persistent from end of treatment) <ul style="list-style-type: none"> <li>○ Crackles, wheezing, diminished breath sounds</li> </ul> </li> <li>• Hypoxemia (SpO<sub>2</sub> &lt; 90%)</li> <li>• Pulmonary function impairment (e.g., FEV<sub>1</sub> / FVC ratio &lt; LLN, FEV<sub>1</sub> &lt; LLN, and/or FVC &lt; LLN, using GLI standard reference equations)(42, 43)</li> <li>• Chest X-ray abnormalities (e.g., residual scarring) at end of treatment</li> </ul> |
| Functional status              | One-minute sit-to-stand testing                                                                                                                                                                                                                                                                                                                                                                                                                                                                                                                                                                                                                                                                                                                                                                                                                                                 |
| Health-related quality of life | St. George's Respiratory Questionnaire (SGRQ)(32, 33) score                                                                                                                                                                                                                                                                                                                                                                                                                                                                                                                                                                                                                                                                                                                                                                                                                     |
| Depression symptoms            | Patient Health Questionnaire (PHQ-9)(29) scores for none or minimal (0-4), mild (5-9), moderate (10-14), moderately severe (15-19), or severe (20-27)                                                                                                                                                                                                                                                                                                                                                                                                                                                                                                                                                                                                                                                                                                                           |

Abbreviations: DR-TB, drug-resistant tuberculosis; DS-TB, drug-susceptible tuberculosis; FEV<sub>1</sub>, forced expiratory volume in one second; FVC, forced vital capacity; GLI, Global Lung Function Initiative; LLN, lower limit of normal; PTLD, post-tuberculosis lung disease; TB, tuberculosis; WHO, World Health Organization. a, Information about cause of death will be recorded if available.

TB treatment outcomes for both drug-resistant and drug-susceptible TB will follow the current definitions set by the WHO and will be in alignment with RePORT International outcomes.(12, 39) These include both clinical and biological criteria for TB treatment outcomes. TB recurrence (inclusive of TB relapse and new TB infection) will be defined as any new TB diagnosis after the end of TB treatment for the primary course. Mortality will include deaths from

any cause, and will be assessed during the treatment and post-treatment periods. Information about cause of death will be recorded if available.

Post-treatment outcomes to be ascertained are informed by emerging research surrounding post-TB sequelae.(28, 41, 44) Post-TB lung disease will be defined by new, recurrent or persistent respiratory symptoms or signs that occur post-treatment; hypoxemia (oxygen saturation <90%); pulmonary function impairment; or chest X-ray abnormalities.(41) Spirometry definitions for pulmonary function impairment include the following: forced expiratory volume in one second (FEV1) / Forced vital capacity (FVC) ratio < lower limit of normal (LLN), FEV1 <LLN, and/or FVC <LLN. Global Lung Function Initiative (GLI) standard reference equations will be used to calculate LLN (fifth centiles) for each participant; these will be compared with observed values.(42, 43) Functional status will be assessed with one-minute sit-to-stand testing. Further measures of well-being after TB treatment will include symptoms of depression (by PHQ-9)(29) and health-related quality of life (by SGRQ).(32, 33) The SGRQ has previously been validated(32) and applied in studies of individuals treated for pulmonary TB.(45-50) Both the PHQ-9 and SGRQ are among the assessments recommended by some experts for the evaluation of post-TB sequelae.(28)

### **Data management and harmonization**

TB-SRN data from multiple REDCap installations will be accessed via the secure REDCap Application Programming Interface (REDCap API) and automatically merged on a monthly basis to generate study enrollment and monitoring reports. These reports will allow tracking of study progress and ensure the distributed data collection remains aligned in variable formats and naming. Merged research datasets will be generated on demand for analyses associated with approved research concepts. Study data procedures include methods for ensuring the privacy and confidentiality of participant data, including using codes in place of names, implementing password-protected and encrypted data collection systems, training of site personnel on data management best practices, and applying data pseudonymization where required for compliance with national data protection regulations. Analyses will be conducted by the designated regional data center. Data-sharing agreements and management procedures will be overseen by the leDEA Executive Committee.

The NIH, which funds both the leDEA consortium and RePORT International, provides guidance for the coordination and linkage of these parallel streams of research. In addition, the Harmonist project, which supports leDEA through development of data standards and software

1  
2  
3 to support research operations, will coordinate with RePORT regions to streamline their existing  
4 data structures and identify points of data alignment with leDEA to enable future cross-consortium  
5 data harmonization and research.  
6  
7

### 8 9 **Data analysis plan**

10 While data may be used by the individual TB-SRN sites or regions, they are primarily being  
11 collected and harmonized for multiregional research, following leDEA's standard operating  
12 procedures governing research collaboration.<sup>(51)</sup> The TB-SRN observational cohort study is  
13 designed to inform multiple analyses. Analyses of global TB-SRN data will be proposed through  
14 concept sheets, for detailed review and feedback from collaborators in the TB-SRN and other  
15 leDEA working groups relevant to the study, with subsequent final review and approval by the  
16 leDEA Executive Committee.<sup>(51)</sup> Concepts will center on major research questions in TB and  
17 HIV clinical epidemiology.<sup>(52)</sup> These will include analyses of TB severity, TB treatment and post-  
18 treatment outcomes including post-TB lung disease, health-related quality of life, and associated  
19 clinical, mental health, and life course factors. Youth with TB (ages 15-24) will be assessed as a  
20 subset of this cohort, with attention to their clinical, psychosocial, and lung health findings. The  
21 subset of pregnant and post-partum participants will also be described, to include specific  
22 variables and outcomes in this group.  
23  
24  
25  
26  
27  
28  
29  
30  
31

32 Current, initial TB-SRN concepts delineate analyses in the following areas: baseline TB  
33 severity and associated factors; baseline depressive symptoms and substance use; chronic  
34 hypoxemia and respiratory symptoms; and PTLD in youth.  
35  
36  
37  
38

### 39 **Sample size considerations**

40 The leDEA TB-SRN will enroll 2,600 participants across all study sites, including 300 participants  
41 in each of five leDEA regions (Asia-Pacific, Central Africa, East Africa, Southern Africa, and West  
42 Africa), and 1100 participants in CCASAnet. It is estimated that between 5% and 10% of treated  
43 TB cases will result in TB treatment failure or TB recurrence. Thus, if 2,600 participants with active  
44 TB are enrolled, it is expected that between 130 and 260 episodes of treatment failure or  
45 recurrence will occur, with 200 being an approximate midpoint estimate. Furthermore, the majority  
46 of recurrent episodes are estimated to occur within 6 months of treatment completion, and thus  
47 >90% of all such episodes are expected to be detected during the follow-up period. Pulmonary  
48 function impairment may be anticipated in approximately 50-60% of participants after completion  
49 of TB treatment.<sup>(53)</sup> The overall cohort sample size of 2,600 participants will enable precise  
50  
51  
52  
53  
54  
55  
56  
57  
58  
59  
60



1  
2  
3 estimates of key treatment and post-treatment outcomes. Given the anticipated HIV prevalence  
4 of 20 to 30% across the global cohort, this sample size will also allow for multivariable analyses,  
5 including on HIV co-infection and treatment-related factors, in addition to sex, age, and additional  
6 demographic or clinical factors.  
7  
8

9  
10 As the TB-SRN is a descriptive study encompassing multiple planned outcomes and  
11 analyses, statistical considerations and power will vary by the research question proposed within  
12 the concept process of leDEA. For analyses of youth with TB, this age group is estimated to make  
13 up 17% of new TB cases globally.(54) In a cohort of 2,600 individuals with TB, we anticipate  
14 including several hundred in this age group; representing a valuable contribution to the evidence  
15 base for this group.(19, 20) For pregnant/post-partum participants with TB, while low numbers are  
16 anticipated, relevant variables collected in this study for maternal and infant outcomes will be  
17 described. Given the very limited existing data on this population, these data will add to the  
18 existing literature.(24, 25, 27) Aggregation with data from other cohorts may be considered for  
19 pooled analyses of priority questions for TB in these sub-groups.(19, 20, 52)  
20  
21  
22  
23  
24  
25  
26

## 27 **ETHICS AND DISSEMINATION**

### 30 **Ethical and safety considerations**

31  
32 Ethical and regulatory approvals have been obtained at all implementing study sites and affiliated  
33 institutions, from the following Ethics Committees or Institutional Review Boards, by leDEA region:  
34

- 35 • **CCASANet:**
  - 36 ○ Vanderbilt University Medical Center, Nashville, United States: Human Research  
37 Protections Program – Health Sciences Committee 3 IRB, #141049. (Site  
38 responsible for centralized forms development.)
  - 39 ○ GHESKIO, Haiti: Comité des Droites Humains des Centres GHESKIO - approval  
40 for "Nouveau Protocole - Complications après traitement TB - Cohorte  
41 Prospective." (No IRB number assigned)
  - 42 ○ Instituto Nacional de Infectologia, FIOCRUZ, Brazil: Instituto Nacional de  
43 Infectologia Evandro Chagas, INI /FIOCRUZ IRB, #5.955.761
  - 44 ○ Centro Municipal de Saúde (CMS) de Duque de Caxias, Brazil: Universidade do  
45 Grande Rio Professor José de Souza Herdy – UNIGRANRIO IRB, #6.063.843
  - 46 ○ Instituto Brasileiro para Investigação da Tuberculose (IBIT), Brazil: Maternidade  
47 Clímério de Oliveira – UFBA IRB, #5.998.764
  - 48  
49  
50  
51  
52  
53  
54  
55  
56  
57  
58  
59  
60

- 1  
2  
3       ○ Fundação de Medicina Tropical (FMT), Brazil: Fundação de Medicina Tropical  
4       “Doutor Heitor Vieira Dourado” IRB, #5.997.824  
5  
6  
7     • *Asia-Pacific:*  
8       ○ TREAT Asia, Thailand, Advarra, Inc. IRB #1, IRB00000971, #Pro00060405  
9       ○ The Kirby Institute, University New South Wales, Australia, IRB #1, IRB00001145,  
10       #HC220713  
11       ○ NCHADS, Cambodia: National Ethics Committee Health Research (NECHR) IRB  
12       #1, IRB00003143, #321NECHR  
13       ○ Chulalongkorn University, Thailand, IRB #1, IRB00001607, #0491/66  
14       ○ Chiangrai Prachanukroh Hospital, Thailand, IRB #1, IRB00005481, #087/66 Ex  
15  
16  
17     • *Central Africa:*  
18       ○ Albert Einstein College of Medicine Institutional Review Board, Bronx, United  
19       States, #2022-13862.  
20       ○ Kinshasa School of Public Health Ethic Committee Board, Kinshasa, the  
21       Democratic Republic of the Congo, #ESP/CE/050/2023  
22  
23  
24     • *East Africa:*  
25       ○ Indiana University Institutional Review Board, Indianapolis, United States, #15525  
26       ○ Moi Teaching and Referral Hospital / Moi University Institutional Research and  
27       Ethics Committee (IREC), Eldoret, Kenya, #IREC/347/2022  
28       ○ National Commission for Science, Technology and Innovation, Kenya,  
29       #NACOSTI/P/23/23903  
30       ○ Mbarara University of Science and Technology Research Ethics Committee,  
31       Mbarara, Uganda, #MUST-2022-618  
32       ○ Uganda National Council of Science and Technology, #HS2619ES  
33  
34  
35     • *Southern Africa:*  
36       ○ Cantonal Ethics Committee of Bern, Switzerland, #PB\_2016-00273  
37       ○ Thembu Lethu and Crosby Clinic, Johannesburg, South Africa, #GP\_202207\_033  
38       ○ University of Zambia Biomedical Research Ethics Committee, Lusaka, Zambia,  
39       #2538-2022  
40       ○ University of the Witwatersrand, South Africa, Human Research Ethics Committee  
41       (Medical), ref. no. M220141  
42  
43     • *West Africa:*  
44       ○ CePReF, Côte d'Ivoire: National Ethics Committee for Life Sciences and Health,  
45       United States DHHS Registration #2: IRB00011917  
46  
47  
48  
49  
50  
51  
52  
53  
54  
55  
56  
57  
58  
59  
60

- Centre Hospitalier Universitaire Sourou Sanon, Burkina Faso: Ethics Committee for Health Research (ECHR), #2022-01-009

Overarching ethical considerations have included the general low risk of this observational study; assurances that the decision whether or not to participate will have no bearing on clinical care received at the sites; protocols to ensure privacy and confidentiality of participant data; adherence to infection prevention protocols at the study sites; compensation for time/travel to participate; and specific considerations for inclusion of minors and pregnant individuals (as described below).

Standardized procedures are in place to ensure appropriate linkage to care and further evaluation when study assessments identify a possible physical or mental health condition. This includes procedures for direct linkage to care when symptoms of depression or suicidal ideation are identified.

In terms of safety considerations, this study is intended to ascertain detailed data collection for individuals with pulmonary TB followed in routine TB care and management. The inclusion of minors and of individuals who are pregnant is to ensure that these groups are not excluded from TB research. This is particularly important given that these groups have largely been excluded from TB research, or specific data have not been collected that are relevant to their clinical or social factors or outcomes. Sites follow locally approved protocols with respect to use of chest X-ray in pregnancy.

While chest X-rays are recommended as part of routine TB care<sup>(16)</sup> and the amount of radiation exposure from an X-ray procedure is considered safe in pregnancy when clinically indicated,<sup>(55-57)</sup> chest X-rays are not required for pregnant participants with TB in this study. Further, ethical approvals followed local standards and approval processes for consideration of chest X-rays in this population.

Similarly, sites follow local standards and approvals for inclusion of minors. General approaches include requiring the consent of a parent or primary caregiver, along with assent of minors. Procedures are in place in recruitment and study activities to avoid inadvertent HIV disclosure to youth who have perinatally acquired HIV or to caregivers who may not be aware of a youth's status.

### **Dissemination plan**

Findings from TB-SRN analyses will be disseminated across the leDEA consortium, and at site-level, regional, and global venues. Policy briefs will be developed summarizing key study findings.

1  
2  
3 These will be provided in direct communication with national TB programs and with national HIV  
4 programs to share and disseminate findings across these systems. Findings will be disseminated  
5 to study participants, and to TB care providers and individuals affected by TB, following setting-  
6 specific approaches at respective study sites.  
7  
8

9  
10 Research findings from global and regional analyses will be presented at national and  
11 international meetings, and published in international peer-reviewed journals for a wide audience  
12 of clinicians, researchers, and public health practitioners in the areas of TB and HIV care and lung  
13 health. Publications will be disseminated to global TB networks, including to World Health  
14 Organization Global TB Program working group leads as appropriate, and to relevant sections of  
15 the International Union Against Tuberculosis and Lung Disease.  
16  
17

18  
19 TB-SRN data can be leveraged towards future research. Researchers from beyond the  
20 leDEA research consortium may request leDEA data for dedicated analyses. Procedures for  
21 requesting use of TB-SRN data are publicly available.<sup>(51)</sup>  
22  
23

24 In conclusion, the TB-SRN provides a unique platform for global observational research  
25 in TB and TB-HIV co-infection. Through harmonized procedures and comprehensive prospective  
26 data collection across TB treatment and post-treatment periods, the TB-SRN will generate key  
27 epidemiology data for drivers and correlates of TB treatment and post-treatment outcomes,  
28 across a diverse global cohort. Findings from this project will inform policy and practice regarding  
29 TB treatment, and further research efforts.  
30  
31  
32  
33  
34  
35  
36

### 37 **Acknowledgments**

38 We thank the individual participants, their care providers, and the study teams implementing the  
39 TB-SRN study across the clinical research sites for their support. We also acknowledge the  
40 contributions of members of the leDEA Executive Committee and the leDEA TB-SRN and TB and  
41 Lung Health Working Groups to the development and finalization of the study protocol; the  
42 Harmonist team for their work on the data management and harmonization framework and tools;  
43 and the RePORT-Brazil Network (Drs. Bruno Andrade, Valeria Rolla, Afranio Kritski, and Marcelo  
44 Cordeiro-Santos).  
45  
46  
47  
48  
49  
50

### 51 **Authors' contributions**

52 LAE, OM, AHS, SND, AF, KWK, and MY designed this study and drafted the study protocol. TRS,  
53 MCF, and TC contributed to revisions and refinements to the protocol. LAE, OM, SND, and LRM  
54 led the development and refinement of data collection tools. TC, MB, LF, FM, KWK, and NN and  
55  
56  
57  
58  
59  
60

1  
2  
3 others provided input on study procedures and data collection tools. SND and LRM developed  
4 the REDCap database for data collection under the multiregional protocol. LAE drafted the  
5 manuscript. All authors (LAE, SND, TC, CB, NN, EM, NM, LRM, MCF, JR, DE, LD, RA, NZ, AF,  
6 MFP, DR, MB, HB, NDC, MT, TRS, AHS, LF, KWK, AP, MY, RH, and OM) participated in  
7 manuscript revisions. All authors have read and approved the final manuscript.  
8  
9  
10

## 11 12 13 **Funding**

14 Dr. Enane is supported by the *Eunice Kennedy Shriver* National Institute of Child Health & Human  
15 Development (NICHD) under Award Number K23HD095778. Dr. Navuluri is supported by the  
16 Francis Family Foundation under the Parker B. Francis Fellowship. The International  
17 Epidemiology Databases to Evaluate AIDS (IeDEA) is supported by the U.S. National Institutes  
18 of Health's National Institute of Allergy and Infectious Diseases, the *Eunice Kennedy*  
19 *Shriver* National Institute of Child Health and Human Development, the National Cancer Institute,  
20 the National Institute of Mental Health, the National Institute on Drug Abuse, the National Heart,  
21 Lung, and Blood Institute, the National Institute on Alcohol Abuse and Alcoholism, the National  
22 Institute of Diabetes and Digestive and Kidney Diseases, and the Fogarty International  
23 Center: **Asia-Pacific**, U01AI069907; **CCASAnet** and **RePORT-Brazil**, U01AI069923; **Central**  
24 **Africa**, U01AI096299; **East Africa**, U01AI069911; **NA-ACCORD**, U01AI069918; **Southern**  
25 **Africa**, U01AI069924; **West Africa**, U01AI069919; **RePORT-Brazil**, U01AI172064, CRDF  
26 Global R-202208-69014, Departamento de Ciência e Tecnologia (DECIT) - Secretaria de Ciência  
27 e Tecnologia (SCTIE) – Ministério da Saúde (MS), Brazil (25029.000507/2013-07). Informatics  
28 resources are supported by the Harmonist project, R24AI24872. This work is solely the  
29 responsibility of the authors and does not necessarily represent the official views of any of the  
30 institutions mentioned above.  
31  
32  
33  
34  
35  
36  
37  
38  
39  
40  
41  
42

## 43 **Competing interests**

44 AHS receives grants to her institution from ViiV Healthcare and Gilead Sciences.  
45 All other authors declare no conflicts of interest.  
46  
47  
48

49 **Figure 1.** Country locations of planned initial study sites in the Tuberculosis Sentinel Research  
50 Network (TB-SRN) of the International epidemiology Databases to Evaluate AIDS (IeDEA). Map  
51 created using MapChart.net.  
52  
53  
54  
55  
56  
57  
58  
59  
60

## References

1. World Health Organization. Global Tuberculosis Report 2022. Geneva; 2022.
2. McQuaid CF, Vassall A, Cohen T, Fiekert K, White RG. The impact of COVID-19 on TB: a review of the data. *Int J Tuberc Lung Dis*. 2021;25(6):436-46.
3. Visca D, Ong CWM, Tiberi S, Centis R, D'Ambrosio L, Chen B, et al. Tuberculosis and COVID-19 interaction: A review of biological, clinical and public health effects. *Pulmonology*. 2021;27(2):151-65.
4. Marti M, Zurcher K, Enane LA, Diero L, Marcy O, Tiendrebeogo T, et al. Impact of the COVID-19 pandemic on TB services at ART programmes in low- and middle-income countries: a multi-cohort survey. *J Int AIDS Soc*. 2022;25(10):e26018.
5. Sullivan A, Nathavitharana RR. Addressing TB-related mortality in adults living with HIV: a review of the challenges and potential solutions. *Ther Adv Infect Dis*. 2022;9:20499361221084163.
6. Nliwasa M, MacPherson P, Gupta-Wright A, Mwapasa M, Horton K, Odland JO, et al. High HIV and active tuberculosis prevalence and increased mortality risk in adults with symptoms of TB: a systematic review and meta-analyses. *J Int AIDS Soc*. 2018;21(7):e25162.
7. Ford N, Matteelli A, Shubber Z, Hermans S, Meintjes G, Grinsztejn B, et al. TB as a cause of hospitalization and in-hospital mortality among people living with HIV worldwide: a systematic review and meta-analysis. *J Int AIDS Soc*. 2016;19(1):20714.
8. Tornheim JA, Dooley KE. Challenges of TB and HIV co-treatment: updates and insights. *Curr Opin HIV AIDS*. 2018;13(6):486-91.
9. Weld ED, Dooley KE. State-of-the-Art Review of HIV-TB Coinfection in Special Populations. *Clin Pharmacol Ther*. 2018;104(6):1098-109.
10. Adjobimey M, Behr MA, Menzies D. Individualized Treatment Duration in Tuberculosis Treatment: Precision versus Simplicity. *Am J Respir Crit Care Med*. 2021;204(9):1013-4.
11. International epidemiology Databases to Evaluate AIDS (IeDEA). International epidemiology Databases to Evaluate AIDS (IeDEA) [Available from: <https://www.iedea.org>].
12. Hamilton CD, Swaminathan S, Christopher DJ, Ellner J, Gupta A, Sterling TR, et al. RePORT International: Advancing Tuberculosis Biomarker Research Through Global Collaboration. *Clin Infect Dis*. 2015;61Suppl 3:S155-9.
13. Geadas C, Stoszek SK, Sherman D, Andrade BB, Srinivasan S, Hamilton CD, Ellner J. Advances in basic and translational tuberculosis research: Proceedings of the first meeting of RePORT international. *Tuberculosis (Edinb)*. 2017;102:55-67.

14. van der Heijden YF, Abdullah F, Andrade BB, Andrews JR, Christopher DJ, Croda J, et al. Building capacity for advances in tuberculosis research; proceedings of the third RePORT international meeting. *Tuberculosis (Edinb)*. 2018;113:153-62.
15. MapChart: MapChart; 2023 [cited 2023 August 3]. Available from: <https://www.mapchart.net>.
16. World Health Organization. WHO consolidated guidelines on tuberculosis. Module 4: drug-susceptible tuberculosis treatment. Geneva: World Health Organization; 2022.
17. Enane LA, Eby J, Arscott-Mills T, Argabright S, Caiphus C, Kgwaadira B, et al. TB and TB-HIV care for adolescents and young adults. *Int J Tuberc Lung Dis*. 2020;24(2):240-9.
18. Laycock KM, Eby J, Arscott-Mills T, Argabright S, Caiphus C, Kgwaadira B, et al. Towards quality adolescent-friendly services in TB care. *Int J Tuberc Lung Dis*. 2021;25(7):579-83.
19. Moscibrodzki P, Enane LA, Hoddinott G, Brooks MB, Byron V, Furin J, et al. The Impact of Tuberculosis on the Well-Being of Adolescents and Young Adults. *Pathogens*. 2021;10(12).
20. Snow KJ, Cruz AT, Seddon JA, Ferrand RA, Chiang SS, Hughes JA, et al. Adolescent tuberculosis. *Lancet Child Adolesc Health*. 2020;4(1):68-79.
21. World Health Organization. WHO operational handbook on tuberculosis. Module 5: management of tuberculosis in children and adolescents. Geneva: World Health Organization; 2022.
22. World Health Organization. WHO consolidated guidelines on tuberculosis. Module 5: management of tuberculosis in children and adolescents. Geneva: World Health Organization; 2022.
23. Chiang SS, Waterous PM, Atieno VF, Bernays S, Bondarenko Y, Cruz AT, et al. Caring for Adolescents and Young Adults With Tuberculosis or at Risk of Tuberculosis: Consensus Statement From an International Expert Panel. *J Adolesc Health*. 2023;72(3):323-31.
24. Miele K, Bamrah Morris S, Tepper NK. Tuberculosis in Pregnancy. *Obstet Gynecol*. 2020;135(6):1444-53.
25. Phoswa WN, Eche S, Khaliq OP. The Association of Tuberculosis Mono-infection and Tuberculosis-Human Immunodeficiency Virus (TB-HIV) Co-infection in the Pathogenesis of Hypertensive Disorders of Pregnancy. *Curr Hypertens Rep*. 2020;22(12):104.
26. Sobhy S, Babiker Z, Zamora J, Khan KS, Kunst H. Maternal and perinatal mortality and morbidity associated with tuberculosis during pregnancy and the postpartum period: a systematic review and meta-analysis. *BJOG*. 2017;124(5):727-33.

- 1  
2  
3 27. Sugarman J, Colvin C, Moran AC, Oxlade O. Tuberculosis in pregnancy: an estimate of  
4 the global burden of disease. *Lancet Glob Health*. 2014;2(12):e710-6.  
5
- 6 28. Nightingale R, Carlin F, Meghji J, McMullen K, Evans D, van der Zalm MM, et al. Post-  
7 TB health and wellbeing. *Int J Tuberc Lung Dis*. 2023;27(4):248-83.  
8
- 9 29. Negeri ZF, Levis B, Sun Y, He C, Krishnan A, Wu Y, et al. Accuracy of the Patient  
10 Health Questionnaire-9 for screening to detect major depression: updated systematic review  
11 and individual participant data meta-analysis. *BMJ*. 2021;375:n2183.  
12
- 13 30. Humeniuk R, Henry-Edwards S, Ali R, Poznyak V, Monteiro MG, World Health  
14 Organization. *The Alcohol, Smoking and Substance Involvement Screening Test (ASSIST):*  
15 *manual for use in primary care*. Geneva: World Health Organization; 2010.  
16
- 17 31. Humeniuk R, Ali R, Babor TF, Farrell M, Formigoni ML, Jittiwutikarn J, et al. Validation of  
18 the Alcohol, Smoking And Substance Involvement Screening Test (ASSIST). *Addiction*.  
19 2008;103(6):1039-47.  
20
- 21 32. Pasipanodya JG, Miller TL, Vecino M, Munguia G, Bae S, Drewyer G, Weis SE. Using  
22 the St. George respiratory questionnaire to ascertain health quality in persons with treated  
23 pulmonary tuberculosis. *Chest*. 2007;132(5):1591-8.  
24
- 25 33. Stringer B, Lowton K, James N, Nyang'wa BT. Capturing patient-reported and quality of  
26 life outcomes with use of shorter regimens for drug-resistant tuberculosis: mixed-methods  
27 substudy protocol, TB PRACTECAL-PRO. *BMJ Open*. 2021;11(9):e043954.  
28
- 29 34. Harris PA, Delacqua G, Taylor R, Pearson S, Fernandez M, Duda SN. The REDCap  
30 Mobile Application: a data collection platform for research in regions or situations with internet  
31 scarcity. *JAMIA Open*. 2021;4(3):ooab078.  
32
- 33 35. Harris PA, Taylor R, Thielke R, Payne J, Gonzalez N, Conde JG. Research electronic  
34 data capture (REDCap)--a metadata-driven methodology and workflow process for providing  
35 translational research informatics support. *J Biomed Inform*. 2009;42(2):377-81.  
36
- 37 36. Lewis JT, Stephens J, Musick B, Brown S, Malateste K, Ha Dao Ostinelli C, et al. The  
38 leDEA harmonist data toolkit: A data quality and data sharing solution for a global HIV research  
39 consortium. *J Biomed Inform*. 2022;131:104110.  
40
- 41 37. Stover J, Glaubius R, Kassanje R, Dugdale CM. Updates to the Spectrum/AIM model  
42 for the UNAIDS 2020 HIV estimates. *J Int AIDS Soc*. 2021;24 Suppl 5(Suppl 5):e25778.  
43
- 44 38. Rosenthal A, Gabrielian A, Engle E, Hurt DE, Alexandru S, Crudu V, et al. The TB  
45 Portals: an Open-Access, Web-Based Platform for Global Drug-Resistant-Tuberculosis Data  
46 Sharing and Analysis. *J Clin Microbiol*. 2017;55(11):3267-82.  
47  
48  
49  
50  
51  
52  
53  
54  
55  
56  
57  
58  
59  
60



- 1  
2  
3 39. World Health Organization. Meeting report of the WHO expert consultation on drug-  
4 resistant tuberculosis treatment outcome definitions, 17-19 November 2020. Geneva; 2021 7  
5 April 2021.  
6  
7  
8 40. World Health Organization. Definitions and reporting framework for tuberculosis - 2013  
9 revision (updated December 2014 and January 2020). Geneva; 2013.  
10  
11 41. Allwood BW, van der Zalm MM, Amaral AFS, Byrne A, Datta S, Egere U, et al. Post-  
12 tuberculosis lung health: perspectives from the First International Symposium. *Int J Tuberc Lung*  
13 *Dis.* 2020;24(8):820-8.  
14  
15 42. Bowerman C, Bhakta NR, Brazzale D, Cooper BR, Cooper J, Gochicoa-Rangel L, et al.  
16 A Race-neutral Approach to the Interpretation of Lung Function Measurements. *Am J Respir*  
17 *Crit Care Med.* 2023;207(6):768-74.  
18  
19 43. Moffett AT, Bowerman C, Stanojevic S, Eneanya ND, Halpern SD, Weissman GE.  
20 Global, Race-Neutral Reference Equations and Pulmonary Function Test Interpretation. *JAMA*  
21 *Netw Open.* 2023;6(6):e2316174.  
22  
23 44. Migliori GB, Marx FM, Ambrosino N, Zampogna E, Schaaf HS, van der Zalm MM, et al.  
24 Clinical standards for the assessment, management and rehabilitation of post-TB lung disease.  
25 *Int J Tuberc Lung Dis.* 2021;25(10):797-813.  
26  
27 45. Gupte AN, Selvaraju S, Paradkar M, Danasekaran K, Shivakumar S, Thiruvengadam K,  
28 et al. Respiratory health status is associated with treatment outcomes in pulmonary  
29 tuberculosis. *Int J Tuberc Lung Dis.* 2019;23(4):450-7.  
30  
31 46. Kastien-Hilka T, Rosenkranz B, Schwenkglenks M, Bennett BM, Sinanovic E.  
32 Association between Health-Related Quality of Life and Medication Adherence in Pulmonary  
33 Tuberculosis in South Africa. *Front Pharmacol.* 2017;8:919.  
34  
35 47. Nuwagira E, Stadelman A, Baluku JB, Rhein J, Byakika-Kibwika P, Mayanja H, Kunisaki  
36 KM. Obstructive lung disease and quality of life after cure of multi-drug-resistant tuberculosis in  
37 Uganda: a cross-sectional study. *Trop Med Health.* 2020;48:34.  
38  
39 48. Ralph AP, Kenangalem E, Waramori G, Pontororing GJ, Sandjaja, Tjitra E, et al. High  
40 morbidity during treatment and residual pulmonary disability in pulmonary tuberculosis: under-  
41 recognised phenomena. *PLoS One.* 2013;8(11):e80302.  
42  
43 49. Suyanto S, Geater A, Chongsuvatwong V. The Effect of Treatment during A  
44 Haze/Post-Haze Year on Subsequent Respiratory Morbidity Status among Successful  
45 Treatment Tuberculosis Cases. *Int J Environ Res Public Health.* 2019;16(23).  
46  
47  
48  
49  
50  
51  
52  
53  
54  
55  
56  
57  
58  
59  
60

- 1  
2  
3 50. Vashakidze SA, Kempker JA, Jakobia NA, Gogishvili SG, Nikolaishvili KA, Goginashvili  
4 LM, et al. Pulmonary function and respiratory health after successful treatment of drug-resistant  
5 tuberculosis. *Int J Infect Dis*. 2019;82:66-72.  
6  
7  
8 51. International epidemiology Databases to Evaluate AIDS (IeDEA). Multiregional research  
9 SOPs, templates: International epidemiology Databases to Evaluate AIDS (IeDEA); 2022  
10 [Available from: <https://www.iedea.org/resources/multiregional-research-sops-templates/>.  
11  
12  
13 52. NIAID Tuberculosis Research Strategic Plan Working Group. NIAID Strategic Plan for  
14 Tuberculosis Research. National Institute of Allergy and Infectious Diseases; 2018 September  
15 26, 2018.  
16  
17 53. Taylor J, Bastos ML, Lachapelle-Chisholm S, Mayo NE, Johnston J, Menzies D.  
18 Residual respiratory disability after successful treatment of pulmonary tuberculosis: a systematic  
19 review and meta-analysis. *EClinicalMedicine*. 2023;59:101979.  
20  
21  
22 54. Snow KJ, Sismanidis C, Denholm J, Sawyer SM, Graham SM. The incidence of  
23 tuberculosis among adolescents and young adults: a global estimate. *Eur Respir J*. 2018;51(2).  
24  
25 55. Cunningham FG. *Williams Obstetrics*. Twenty-sixth edition ed: McGraw Hill; 2022.  
26  
27 56. Hall E. Scientific view of low-level radiation risks. *Radiographics*. 1991;11(509).  
28  
29 57. National Council on Radiation Protection and Measurements. Medical radiation  
30 exposure of pregnant and potentially pregnant women. Bethesda, MD: National Council on  
31 Radiation Protection and Measurements; 1977.  
32  
33  
34  
35  
36  
37  
38  
39  
40  
41  
42  
43  
44  
45  
46  
47  
48  
49  
50  
51  
52  
53  
54  
55  
56  
57  
58  
59  
60

1  
2  
3  
4  
5  
6  
7  
8  
9  
10  
11  
12  
13  
14  
15  
16  
17  
18  
19  
20  
21  
22  
23  
24  
25  
26  
27  
28  
29  
30  
31  
32  
33  
34  
35  
36  
37  
38  
39  
40  
41  
42  
43  
44  
45  
46  
47

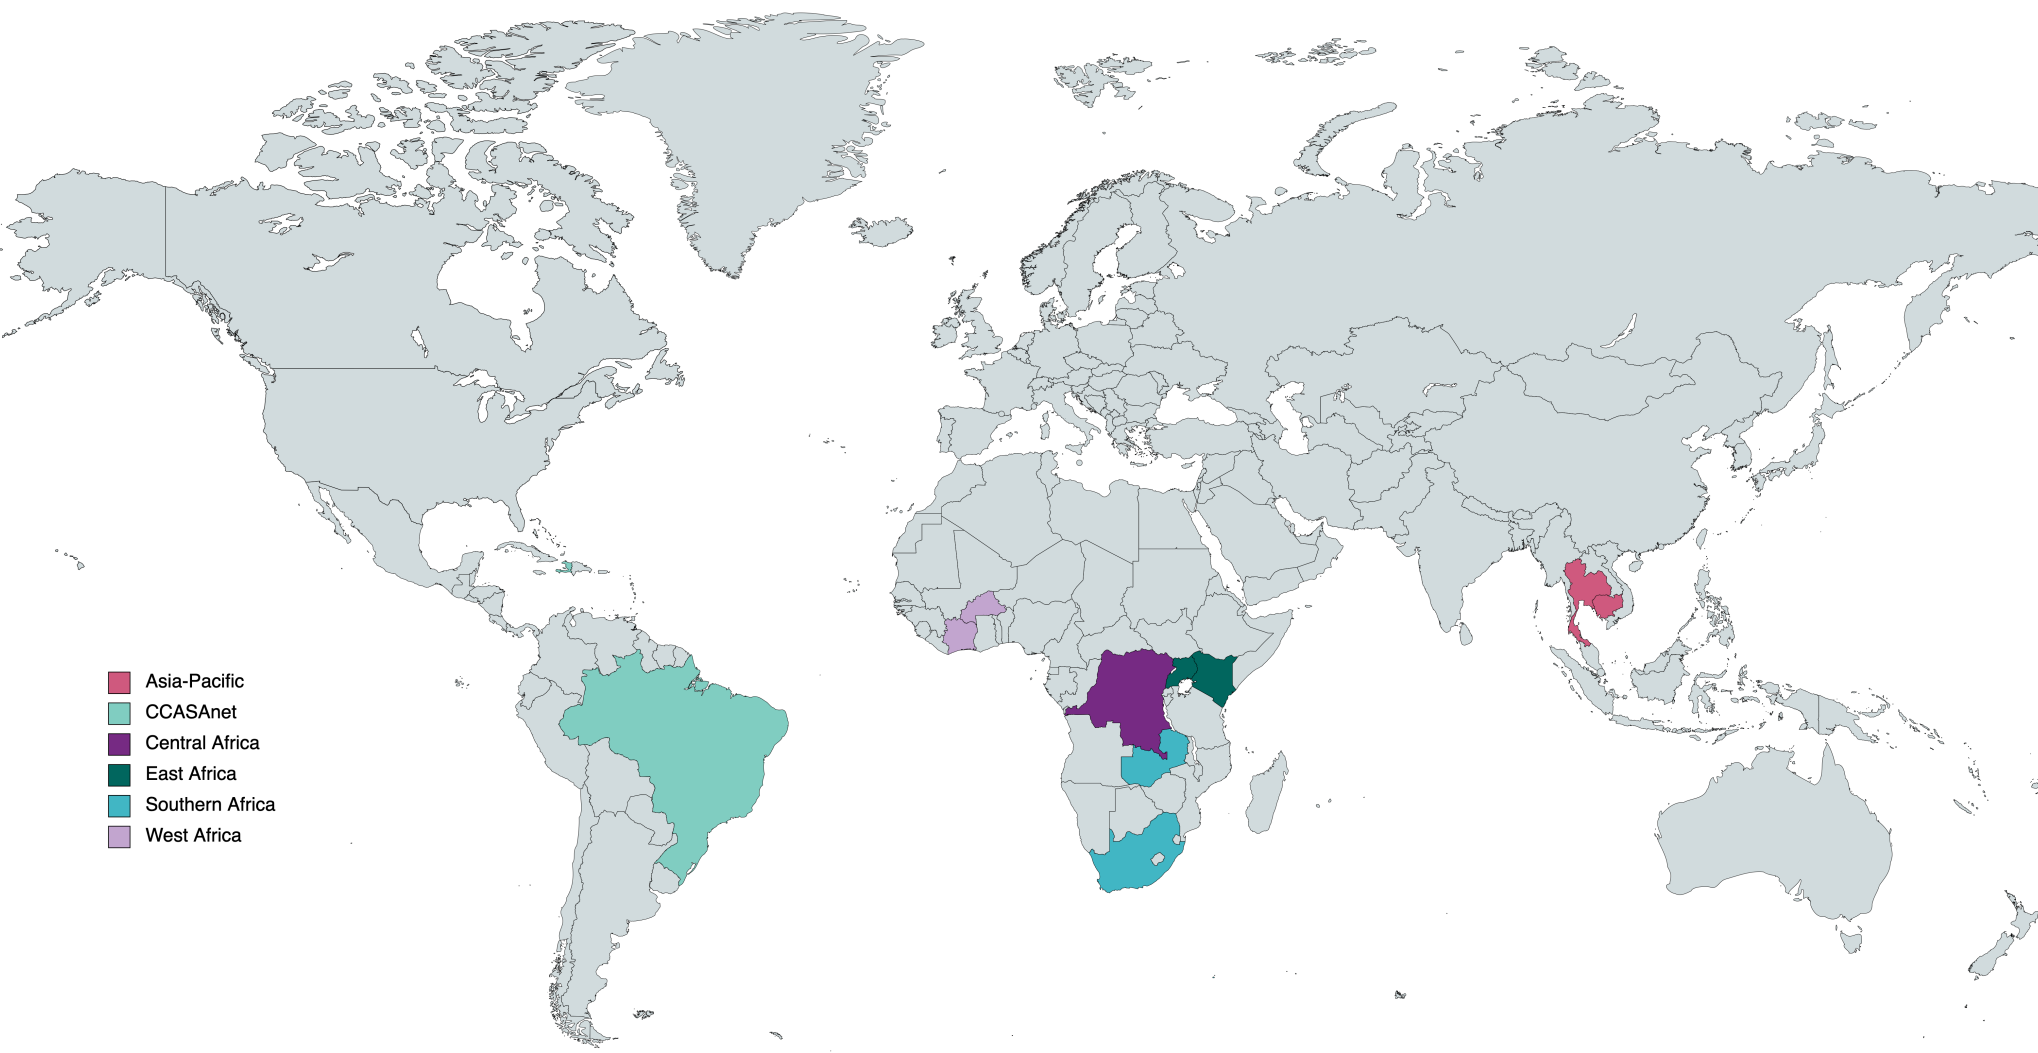

- Asia-Pacific
- CCASAnet
- Central Africa
- East Africa
- Southern Africa
- West Africa

## **leDEA TB-SRN Case Report Forms (CRFs)**

Following are the paper case report forms (CRFs) for the leDEA TB-SRN Study. Some sites alternately use a digital version of the CRFs available in REDCap which include questions identical to the paper CRFs. A full REDCap version is available upon request. For questions regarding the CRFs or to request a REDCap file, please contact [laquita.mcdade@vumc.org](mailto:laquita.mcdade@vumc.org)

| [1] INCLUSION                                                                                                                                                                                                                                                                                    |                                                                                               |                          |                          |
|--------------------------------------------------------------------------------------------------------------------------------------------------------------------------------------------------------------------------------------------------------------------------------------------------|-----------------------------------------------------------------------------------------------|--------------------------|--------------------------|
| <b>leDEA/TB SRN ID</b>                                                                                                                                                                                                                                                                           |                                                                                               |                          |                          |
| Type of visit                                                                                                                                                                                                                                                                                    | <input type="checkbox"/> Baseline                                                             |                          |                          |
| Visit date (dd/mm/yyyy)                                                                                                                                                                                                                                                                          | _ _ / _ _ / _ _ _ _                                                                           |                          |                          |
| <b>Inclusion criteria (include if <u>all</u> items 1-3 are present)</b>                                                                                                                                                                                                                          | <b>Yes</b>                                                                                    | <b>No</b>                | <b>Specify</b>           |
| <b>1. Age <math>\geq 15</math> years</b>                                                                                                                                                                                                                                                         | <input type="checkbox"/>                                                                      | <input type="checkbox"/> |                          |
| <b>2. Diagnostic criteria – At least <u>one</u> of the diagnostic criteria 2a-2c is met</b>                                                                                                                                                                                                      | <input type="checkbox"/>                                                                      | <input type="checkbox"/> |                          |
| 2a. Clinically diagnosed pulmonary TB and plan to initiate TB treatment with:<br>- Any signs or symptoms <u>and</u> CXR findings consistent with pulmonary TB, <u>OR</u><br>- Respiratory signs and symptoms                                                                                     |                                                                                               |                          | <input type="checkbox"/> |
| 2b. Microbiologically confirmed pulmonary TB based on sputum or other respiratory samples<br>- Smear positive, <u>OR</u><br>- Positive rapid molecular TB tests (Xpert MTB/RIF Ultra), <u>OR</u><br>- Positive TB culture                                                                        |                                                                                               |                          | <input type="checkbox"/> |
| 2c. Positive lipoarabinomannan (LAM) urine test <u>and</u> clinical diagnosis of pulmonary TB as defined above                                                                                                                                                                                   |                                                                                               |                          | <input type="checkbox"/> |
| <b>3. HIV test documented or willingness to be tested:</b><br>- Documented HIV infection, <u>OR</u><br>- Any HIV test less than or equal to 90 days earlier, <u>OR</u><br>- Willingness to be tested for HIV (if no recent test available – <i>test to be done within 7 days for inclusion</i> ) | <input type="checkbox"/>                                                                      | <input type="checkbox"/> |                          |
| <b>Exclusion criteria (exclude if <math>\geq 1</math> of items 4-7 present)</b>                                                                                                                                                                                                                  | <b>Yes</b>                                                                                    | <b>No</b>                | <b>Specify</b>           |
| 4. Has received TB treatment for more than 7 days within the prior 30 days, excluding TB preventive therapy                                                                                                                                                                                      | <input type="checkbox"/>                                                                      | <input type="checkbox"/> |                          |
| 5. Plans to move to a distant site that would interfere with ability to complete all study visits                                                                                                                                                                                                | <input type="checkbox"/>                                                                      | <input type="checkbox"/> |                          |
| 6. Substantial cognitive impairment that may interfere with the ability to give reliable informed consent                                                                                                                                                                                        | <input type="checkbox"/>                                                                      | <input type="checkbox"/> |                          |
| 7. Currently imprisoned                                                                                                                                                                                                                                                                          | <input type="checkbox"/>                                                                      | <input type="checkbox"/> |                          |
| <b>Consent and enrolment</b>                                                                                                                                                                                                                                                                     |                                                                                               |                          |                          |
| 8. <u>Signed and dated</u> informed consent or witnessed oral consent                                                                                                                                                                                                                            | <input type="checkbox"/>                                                                      | <input type="checkbox"/> |                          |
| 8a. <i>For minors (under age 18):</i> <u>Signed and dated</u> informed consent of a primary caregiver (and informed adolescent assent where required)                                                                                                                                            | <input type="checkbox"/>                                                                      | <input type="checkbox"/> |                          |
| 9. Date of enrolment (dd/mm/yyyy)                                                                                                                                                                                                                                                                | _ _ / _ _ / _ _ _ _                                                                           |                          |                          |
| <b>Additional questions</b>                                                                                                                                                                                                                                                                      |                                                                                               |                          |                          |
| 10. Type of setting where enrolled                                                                                                                                                                                                                                                               | <input type="checkbox"/> Inpatient setting<br><input type="checkbox"/> Outpatient setting     |                          |                          |
| 11. Currently co-enrolled in other research study?                                                                                                                                                                                                                                               | <input type="checkbox"/> Yes (fill <b>Other Research</b> form)<br><input type="checkbox"/> No |                          |                          |

Investigator: \_\_\_\_\_ Signature: \_\_\_\_\_ Date |\_|\_|/|\_|\_|/|\_|\_|\_|\_|

ID Number \_\_\_\_\_

v1.0 26Jul2022

For peer review only - <http://bmjopen.bmj.com/site/about/guidelines.xhtml>

Inclusion Page 1 of 1

## leDEA/TB SRN

| [2] DEMOGRAPHICS                                                                |                                                                                                                                                                                                                                                                                                                                                                                                                                                                                                                                                                   |
|---------------------------------------------------------------------------------|-------------------------------------------------------------------------------------------------------------------------------------------------------------------------------------------------------------------------------------------------------------------------------------------------------------------------------------------------------------------------------------------------------------------------------------------------------------------------------------------------------------------------------------------------------------------|
| leDEA/TB SRN ID                                                                 |                                                                                                                                                                                                                                                                                                                                                                                                                                                                                                                                                                   |
| Type of visit                                                                   | <input type="checkbox"/> Baseline                                                                                                                                                                                                                                                                                                                                                                                                                                                                                                                                 |
| Visit date (dd/mm/yyyy)                                                         | _ _ / _ _ / _ _ _ _                                                                                                                                                                                                                                                                                                                                                                                                                                                                                                                                               |
| 1. Sex at birth                                                                 | <input type="checkbox"/> Male<br><input type="checkbox"/> Female<br><input type="checkbox"/> Other<br><input type="checkbox"/> Unknown                                                                                                                                                                                                                                                                                                                                                                                                                            |
| 2. Date of birth (dd/mm/yyyy)<br>(estimate if unknown)                          | _ _ / _ _ / _ _ _ _                                                                                                                                                                                                                                                                                                                                                                                                                                                                                                                                               |
| 3. Current Marital status<br>(Check one option that best applies)               | <input type="checkbox"/> Single<br><input type="checkbox"/> Married<br><input type="checkbox"/> Widowed<br><input type="checkbox"/> Separated<br><input type="checkbox"/> Divorced<br><input type="checkbox"/> Living with partner                                                                                                                                                                                                                                                                                                                                |
| 4. Highest level of education completed<br>(Check one option that best applies) | <input type="checkbox"/> None<br><input type="checkbox"/> Primary education<br><input type="checkbox"/> Lower secondary or end of basic education<br><input type="checkbox"/> Upper secondary<br><input type="checkbox"/> Post-secondary non-tertiary (e.g., post-secondary certificate or diploma)<br><input type="checkbox"/> University<br><input type="checkbox"/> Post-graduate<br><input type="checkbox"/> Koranic school<br><input type="checkbox"/> Other, only if none of the previous options applies<br><input type="checkbox"/> Do not know / unknown |
| 5. Current Profession (occupation)<br>(Check all that apply)                    | <input type="checkbox"/> Cook<br><input type="checkbox"/> Craftsman<br><input type="checkbox"/> Employee, private sector<br><input type="checkbox"/> Employee, public sector<br><input type="checkbox"/> Farmer, pastoralist<br><input type="checkbox"/> Homemaker (e.g., housewife, househusband)<br><input type="checkbox"/> Housekeeper                                                                                                                                                                                                                        |

|                                                                                                                                        |                                                                                                                                                                                                                                                                                                                                                                                                                                                   |  |  |  |  |
|----------------------------------------------------------------------------------------------------------------------------------------|---------------------------------------------------------------------------------------------------------------------------------------------------------------------------------------------------------------------------------------------------------------------------------------------------------------------------------------------------------------------------------------------------------------------------------------------------|--|--|--|--|
|                                                                                                                                        | <input type="checkbox"/> Policeman, serviceman/military, customs officer<br><input type="checkbox"/> Storekeeper<br><input type="checkbox"/> Street / market seller<br><input type="checkbox"/> Student<br><input type="checkbox"/> Truck driver, taxi driver<br><input type="checkbox"/> Retired<br><input type="checkbox"/> Unemployed<br><input type="checkbox"/> Other<br><input type="checkbox"/> Do not know / unknown                      |  |  |  |  |
| 6. Currently working or living in a health care setting, institutional setting, or other high TB-risk setting                          | <input type="checkbox"/> No / not applicable<br><input type="checkbox"/> Yes                                                                                                                                                                                                                                                                                                                                                                      |  |  |  |  |
| 7. If yes, specify.<br>(Check all that apply)                                                                                          | <input type="checkbox"/> Hospital or clinic<br><input type="checkbox"/> Nursing home or long-term care facility<br><input type="checkbox"/> Orphanage, shelter, or another residential center<br><input type="checkbox"/> Dormitory (school)<br><input type="checkbox"/> Military<br><input type="checkbox"/> Prison<br><input type="checkbox"/> Refugee camp<br><input type="checkbox"/> Other<br><input type="checkbox"/> Do not know / unknown |  |  |  |  |
| 8. Number of people residing in the household<br>(including full-time and part-time residents)                                         | <table border="1"> <tr> <td style="width: 20px; height: 20px;"></td> </tr> </table>                                                                                                                                                                                                                        |  |  |  |  |
|                                                                                                                                        |                                                                                                                                                                                                                                                                                                                                                                                                                                                   |  |  |  |  |
| 9. Number of children <5 years residing in the household (full-time or part-time)                                                      | <table border="1"> <tr> <td style="width: 20px; height: 20px;"></td> </tr> </table>                                                                                                                                                                                                                        |  |  |  |  |
|                                                                                                                                        |                                                                                                                                                                                                                                                                                                                                                                                                                                                   |  |  |  |  |
| 10. Total household monthly income<br>(Including all sources of household / family monthly income; check one option that best applies) | <input type="checkbox"/> < 40 USD or local currency equivalent<br><input type="checkbox"/> ≥ 40 AND < 80 USD<br><input type="checkbox"/> ≥ 80 AND < 200 USD<br><input type="checkbox"/> ≥ 200 AND < 400 USD<br><input type="checkbox"/> ≥ 400 USD<br><input type="checkbox"/> Do not know                                                                                                                                                         |  |  |  |  |

|                                                                                                 |                                                                                                                                                                                                                                                                                                                                                                                                                           |
|-------------------------------------------------------------------------------------------------|---------------------------------------------------------------------------------------------------------------------------------------------------------------------------------------------------------------------------------------------------------------------------------------------------------------------------------------------------------------------------------------------------------------------------|
| 11. Current dwelling location                                                                   | <input type="checkbox"/> City/urban area (specify type below)<br><input type="checkbox"/> Peri-urban area<br><input type="checkbox"/> Rural area                                                                                                                                                                                                                                                                          |
| 12. City/urban area type                                                                        | <input type="checkbox"/> Formal housing<br><input type="checkbox"/> Slum/shantytown/favela                                                                                                                                                                                                                                                                                                                                |
| 13. Type of dwelling<br><i>(Check one option that best applies or applies most of the time)</i> | <input type="checkbox"/> Free-standing house<br><input type="checkbox"/> Apartment, condominium, or other residential building<br><input type="checkbox"/> Boarding school or college<br><input type="checkbox"/> Institution<br><input type="checkbox"/> Homeless / street living<br><input type="checkbox"/> Other                                                                                                      |
| 14. Distance from residence to clinic (km)                                                      | _ _ _ _  km                                                                                                                                                                                                                                                                                                                                                                                                               |
| 15. Transportation mode to TB clinic <i>(Check all that apply)</i>                              | <input type="checkbox"/> Foot<br><input type="checkbox"/> Bicycle<br><input type="checkbox"/> Motorcycle<br><input type="checkbox"/> Personal automobile (car, truck)<br><input type="checkbox"/> Public transportation (bus, train, etc.)<br><input type="checkbox"/> Taxi or rideshare service (including hired car, mini-van, motorbike)<br><input type="checkbox"/> Medical vehicle<br><input type="checkbox"/> Other |
| 16. Typical transportation cost to and from TB clinic (both ways, local currency)               | _____ (local currency)                                                                                                                                                                                                                                                                                                                                                                                                    |

Investigator: \_\_\_\_\_ Signature: \_\_\_\_\_ Date |\_|\_|/|\_|\_|/|\_|\_|\_|\_|



| [3] Adolescent and Young Adult Characteristics for All Participants under Age 25                              |                                                                                                                                                                                                                                                                                                                                                                                                                                                                                                                                    |
|---------------------------------------------------------------------------------------------------------------|------------------------------------------------------------------------------------------------------------------------------------------------------------------------------------------------------------------------------------------------------------------------------------------------------------------------------------------------------------------------------------------------------------------------------------------------------------------------------------------------------------------------------------|
| leDEA/TB SRN ID                                                                                               |                                                                                                                                                                                                                                                                                                                                                                                                                                                                                                                                    |
| Visit                                                                                                         | <input type="checkbox"/> Baseline                                                                                                                                                                                                                                                                                                                                                                                                                                                                                                  |
| Visit date (dd/mm/yyyy)                                                                                       | _ _ / _ _ / _ _ _ _                                                                                                                                                                                                                                                                                                                                                                                                                                                                                                                |
| Adolescent and Young Adult questions                                                                          |                                                                                                                                                                                                                                                                                                                                                                                                                                                                                                                                    |
| 1. Biological mother alive?                                                                                   | <input type="checkbox"/> Yes<br><input type="checkbox"/> No<br><input type="checkbox"/> Unknown<br><input type="checkbox"/> Refused                                                                                                                                                                                                                                                                                                                                                                                                |
| 2. Biological father alive?                                                                                   | <input type="checkbox"/> Yes<br><input type="checkbox"/> No<br><input type="checkbox"/> Unknown<br><input type="checkbox"/> Refused                                                                                                                                                                                                                                                                                                                                                                                                |
| 3. Currently in a relationship with someone? (May be a spouse, a partner, a girlfriend, a boyfriend, ...).    | <input type="checkbox"/> Yes<br><input type="checkbox"/> No<br><input type="checkbox"/> Unknown<br><input type="checkbox"/> Refused                                                                                                                                                                                                                                                                                                                                                                                                |
| 4. Has the participant had any biological children? (Biological children may or may not be living.)           | <input type="checkbox"/> Yes<br><input type="checkbox"/> No<br><input type="checkbox"/> Unknown<br><input type="checkbox"/> Refused                                                                                                                                                                                                                                                                                                                                                                                                |
| 5. With whom does the participant live?<br><br>(If multiple places on a regular basis, check all that apply.) | <input type="checkbox"/> Immediate family members<br><input type="checkbox"/> Extended family members (family members other than biological parents and siblings)<br><input type="checkbox"/> With a peer or partner<br><input type="checkbox"/> With school<br><input type="checkbox"/> In children's home or institution<br><input type="checkbox"/> Living independently (includes those living on the street)<br><input type="checkbox"/> Other: _____<br><input type="checkbox"/> Unknown<br><input type="checkbox"/> Refused |
| 6. Main caregiver<br><br>(Check the option that best applies.)                                                | <input type="checkbox"/> Self (SKIP to #9)<br><input type="checkbox"/> Mother<br><input type="checkbox"/> Father<br><input type="checkbox"/> Aunt/Uncle<br><input type="checkbox"/> Grandparent<br><input type="checkbox"/> Sibling<br><input type="checkbox"/> Spouse/partner<br><input type="checkbox"/> Other relative<br><input type="checkbox"/> Guardian, non-relative<br><input type="checkbox"/> Unknown<br><input type="checkbox"/> Refused                                                                               |
| 7. Do the participant and the main caregiver currently live in the same place?                                | <input type="checkbox"/> Yes<br><input type="checkbox"/> No, adolescent at boarding school or college<br><input type="checkbox"/> No, adolescent living on the street<br><input type="checkbox"/> No, other circumstance<br><input type="checkbox"/> Unknown                                                                                                                                                                                                                                                                       |

|                                                                                                                                                                                                                               |                                                                                                                                                                                                                                                                                                                                                                                                                                                                                                                                                                                           |
|-------------------------------------------------------------------------------------------------------------------------------------------------------------------------------------------------------------------------------|-------------------------------------------------------------------------------------------------------------------------------------------------------------------------------------------------------------------------------------------------------------------------------------------------------------------------------------------------------------------------------------------------------------------------------------------------------------------------------------------------------------------------------------------------------------------------------------------|
| <p>(Are both spending most nights at the same residence in a given week?)</p>                                                                                                                                                 | <input type="checkbox"/> Refused                                                                                                                                                                                                                                                                                                                                                                                                                                                                                                                                                          |
| <p>8. Role(s), if any, of main caregiver in participant medical care</p> <p>(Examples might include bringing participant to clinic visits or to the hospital when sick or picking up medications. Choose all that apply.)</p> | <input type="checkbox"/> None / not involved in medical care<br><input type="checkbox"/> Bringing the adolescent to clinic visits<br><input type="checkbox"/> Bringing the adolescent to the hospital when sick<br><input type="checkbox"/> Supervising the adolescent taking medications<br><input type="checkbox"/> Picking up prescribed medications for the adolescent<br><input type="checkbox"/> Providing transportation fare for the adolescent to attend clinic<br><input type="checkbox"/> Other: _____<br><input type="checkbox"/> Unknown<br><input type="checkbox"/> Refused |
| <p>9. Is participant currently attending school (including college or other higher learning)?</p>                                                                                                                             | <input type="checkbox"/> Yes (SKIP to #12)<br><input type="checkbox"/> No<br><input type="checkbox"/> Unknown<br><input type="checkbox"/> Refused                                                                                                                                                                                                                                                                                                                                                                                                                                         |
| <p>10. Main reason for not attending school (or college or other higher learning)</p>                                                                                                                                         | <input type="checkbox"/> Sick<br><input type="checkbox"/> Doesn't like school<br><input type="checkbox"/> Has to look after family members<br><input type="checkbox"/> Not enough money<br><input type="checkbox"/> School too far away<br><input type="checkbox"/> Have to work<br><input type="checkbox"/> Have completed school<br><input type="checkbox"/> Other: _____<br><input type="checkbox"/> Unknown<br><input type="checkbox"/> Refused                                                                                                                                       |
| <p>11. If attending school (or college or other higher learning), does the participant reside at school? (e.g., in boarding school, dormitory, or residential housing?)</p>                                                   | <input type="checkbox"/> Yes<br><input type="checkbox"/> No<br><input type="checkbox"/> Unknown<br><input type="checkbox"/> Refused                                                                                                                                                                                                                                                                                                                                                                                                                                                       |
| <p>12. Main source of income</p>                                                                                                                                                                                              | <input type="checkbox"/> Self (money earned as employee, self-employment, interest/dividends, loans or bursaries or welfare payments/grants)<br><input type="checkbox"/> Dependent on someone else's income (parents, caregiver, partner, other relatives)<br><input type="checkbox"/> Unknown<br><input type="checkbox"/> Refused                                                                                                                                                                                                                                                        |
| <p><b>Disclosure Screening questions: Only for <u>adolescents and young adults with HIV</u>, to assess adolescent's awareness of their status.</b></p>                                                                        |                                                                                                                                                                                                                                                                                                                                                                                                                                                                                                                                                                                           |
| <p>13. Why do you come for visits at this clinic (or at another site)?</p>                                                                                                                                                    | <p><b>DO NOT READ OPTIONS, THIS IS AN OPEN-ENDED QUESTION</b></p> <input type="checkbox"/> HIV<br><input type="checkbox"/> Other: _____<br><input type="checkbox"/> Unknown                                                                                                                                                                                                                                                                                                                                                                                                               |
| <p>14. Do you have any health conditions (other than tuberculosis or TB)?</p>                                                                                                                                                 | <p><b>DO NOT READ OPTIONS, THIS IS AN OPEN-ENDED QUESTION</b></p> <input type="checkbox"/> HIV<br><input type="checkbox"/> Other: _____<br><input type="checkbox"/> Unknown                                                                                                                                                                                                                                                                                                                                                                                                               |

Investigator: \_\_\_\_\_ Signature: \_\_\_\_\_ Date |\_\_| / |\_\_| / |\_\_| |\_\_|

|                                                                                                                                                                                                                      |                                                                                                                                                                         |
|----------------------------------------------------------------------------------------------------------------------------------------------------------------------------------------------------------------------|-------------------------------------------------------------------------------------------------------------------------------------------------------------------------|
| 15. For what conditions do you take medications (other than for tuberculosis or TB)?                                                                                                                                 | <b>DO NOT READ OPTIONS, THIS IS AN OPEN-ENDED QUESTION</b><br><input type="checkbox"/> HIV<br><input type="checkbox"/> Other: _____<br><input type="checkbox"/> Unknown |
| 16. Do you have questions about why you need to take medications?                                                                                                                                                    | <input type="checkbox"/> Yes<br><input type="checkbox"/> No<br><input type="checkbox"/> Unknown                                                                         |
| 17. If yes, what questions do you have? ( <i>Refer to clinical care providers.</i> )                                                                                                                                 | _____<br>_____<br>_____                                                                                                                                                 |
| <b><i>If the answers to all of questions 13-15 were "Unknown" or "Other," may need to consider the adolescent <u>NOT DISCLOSED</u>. Please refer to procedures for avoiding accidental disclosure of status.</i></b> |                                                                                                                                                                         |

For peer review only

Investigator: \_\_\_\_\_ Signature: \_\_\_\_\_ Date |\_\_|/|\_\_|/|\_\_|

| [4] TB History and Current TB Diagnosis                                                                                                |                                                                                                                                                                                                                                                                                                                                                                                                                                                              |
|----------------------------------------------------------------------------------------------------------------------------------------|--------------------------------------------------------------------------------------------------------------------------------------------------------------------------------------------------------------------------------------------------------------------------------------------------------------------------------------------------------------------------------------------------------------------------------------------------------------|
| leDEA/TB SRN ID                                                                                                                        |                                                                                                                                                                                                                                                                                                                                                                                                                                                              |
| Type of visit                                                                                                                          | <input type="checkbox"/> Baseline<br><input type="checkbox"/> Tx F/R/W (for TB recurrence only)                                                                                                                                                                                                                                                                                                                                                              |
| Visit date (dd/mm/yyyy)                                                                                                                | _ _ / _ _ / _ _ _ _                                                                                                                                                                                                                                                                                                                                                                                                                                          |
| <i>For the items below, choose the best single option unless otherwise indicated.</i>                                                  |                                                                                                                                                                                                                                                                                                                                                                                                                                                              |
| <b>Previous TB history</b> (fill only at baseline visit)                                                                               |                                                                                                                                                                                                                                                                                                                                                                                                                                                              |
| 1. Previous TB preventive therapy (TPT) received                                                                                       | <input type="checkbox"/> Yes<br><input type="checkbox"/> No<br><input type="checkbox"/> Unknown                                                                                                                                                                                                                                                                                                                                                              |
| 2. TPT regimen previously prescribed +++<br>(Most recent TPT course, if multiple previous TPT regimens)                                | <input type="checkbox"/> 6 to 9 months daily isoniazid (6H or 9H)<br><input type="checkbox"/> 4 months daily rifampicin (4R)<br><input type="checkbox"/> 3 months weekly rifapentine plus isoniazid (3HP)<br><input type="checkbox"/> 3 months daily isoniazid plus rifampicin (3HR)<br><input type="checkbox"/> 1 month daily rifapentine plus isoniazid (1HP)<br><input type="checkbox"/> Other, please specify: _____<br><input type="checkbox"/> Unknown |
| 3. TPT completion<br>(Most recent TPT course)                                                                                          | <input type="checkbox"/> Yes<br><input type="checkbox"/> No<br><input type="checkbox"/> Unknown                                                                                                                                                                                                                                                                                                                                                              |
| 4. Date of TPT completion/interruption<br>(dd/mm/yyyy; most recent TPT course)                                                         | _ _ / _ _ / _ _ _ _                                                                                                                                                                                                                                                                                                                                                                                                                                          |
| 5. Previous TB disease treated                                                                                                         | <input type="checkbox"/> Yes<br><input type="checkbox"/> No (if no go to section "current TB episode")                                                                                                                                                                                                                                                                                                                                                       |
| 6. Type of TB during previous TB episode (Check one; most recent TB episode, if multiple previous TB episodes)                         | <input type="checkbox"/> Pulmonary<br><input type="checkbox"/> Extrapulmonary (specify below)<br><input type="checkbox"/> Pulmonary and extrapulmonary (specify below)<br><input type="checkbox"/> Unknown                                                                                                                                                                                                                                                   |
| 7. Resistance pattern for previous TB episode<br>(Most recent TB episode, if multiple previous TB episodes)                            | <input type="checkbox"/> Drug-susceptible (DS-TB)<br><input type="checkbox"/> Drug-resistant (DR-TB) – if resistance to one or more agents<br><input type="checkbox"/> Unknown                                                                                                                                                                                                                                                                               |
| 8. Extrapulmonary location for previous TB episode<br>(Check all that apply; most recent TB episode, if multiple previous TB episodes) | <input type="checkbox"/> Lymph node<br><input type="checkbox"/> Pleural<br><input type="checkbox"/> Bone / joint<br><input type="checkbox"/> Genitourinary<br><input type="checkbox"/> Gastrointestinal<br><input type="checkbox"/> Miliary<br><input type="checkbox"/> Meningeal / CNS                                                                                                                                                                      |

|    |                                                                                                    |                                                                                                         |
|----|----------------------------------------------------------------------------------------------------|---------------------------------------------------------------------------------------------------------|
| 1  |                                                                                                    | <input type="checkbox"/> Other, please specify: _____                                                   |
| 2  |                                                                                                    | <input type="checkbox"/> Unknown                                                                        |
| 3  |                                                                                                    |                                                                                                         |
| 4  | 9. End of previous TB treatment date (dd/mm/yyyy; if multiple, most recent TB episode)             | _ _ / _ _ / _ _ _ _                                                                                     |
| 5  |                                                                                                    |                                                                                                         |
| 6  |                                                                                                    |                                                                                                         |
| 7  |                                                                                                    |                                                                                                         |
| 8  | 10. TB treatment outcome (Most recent previous TB episode; WHO/IUATLD outcomes)                    | <input type="checkbox"/> Cured                                                                          |
| 9  |                                                                                                    | <input type="checkbox"/> Treatment completed                                                            |
| 10 |                                                                                                    | <input type="checkbox"/> Treatment failed                                                               |
| 11 |                                                                                                    | <input type="checkbox"/> Lost to follow-up                                                              |
| 12 |                                                                                                    | <input type="checkbox"/> Transferred out                                                                |
| 13 |                                                                                                    | <input type="checkbox"/> Not evaluated                                                                  |
| 14 |                                                                                                    | <input type="checkbox"/> Unknown                                                                        |
| 15 |                                                                                                    |                                                                                                         |
| 16 |                                                                                                    |                                                                                                         |
| 17 |                                                                                                    |                                                                                                         |
| 18 | 11. Source of TB history (Check all that apply)                                                    | <input type="checkbox"/> TB register                                                                    |
| 19 |                                                                                                    | <input type="checkbox"/> Medical record                                                                 |
| 20 |                                                                                                    | <input type="checkbox"/> Participant report                                                             |
| 21 |                                                                                                    |                                                                                                         |
| 22 |                                                                                                    |                                                                                                         |
| 23 | <b>Current TB episode (baseline + recurrence)</b>                                                  |                                                                                                         |
| 24 |                                                                                                    |                                                                                                         |
| 25 | 12. History of known contact with TB                                                               | <input type="checkbox"/> Yes                                                                            |
| 26 |                                                                                                    | <input type="checkbox"/> No (SKIP to #15)                                                               |
| 27 |                                                                                                    | <input type="checkbox"/> Unknown                                                                        |
| 28 |                                                                                                    |                                                                                                         |
| 29 |                                                                                                    |                                                                                                         |
| 30 | 13. Time since most recent contact with TB                                                         | <input type="checkbox"/> < 1 year                                                                       |
| 31 |                                                                                                    | <input type="checkbox"/> ≥ 1 year & <2 years                                                            |
| 32 |                                                                                                    | <input type="checkbox"/> ≥ 2 years                                                                      |
| 33 |                                                                                                    | <input type="checkbox"/> Unknown                                                                        |
| 34 |                                                                                                    |                                                                                                         |
| 35 |                                                                                                    |                                                                                                         |
| 36 | 14. Place of contact (Check one)                                                                   | <input type="checkbox"/> Household                                                                      |
| 37 |                                                                                                    | <input type="checkbox"/> Occupational                                                                   |
| 38 |                                                                                                    | <input type="checkbox"/> School or college                                                              |
| 39 |                                                                                                    | <input type="checkbox"/> Other institutional setting (not school, work, or housing/residential contact) |
| 40 |                                                                                                    | <input type="checkbox"/> Other                                                                          |
| 41 |                                                                                                    | <input type="checkbox"/> Unknown                                                                        |
| 42 |                                                                                                    |                                                                                                         |
| 43 |                                                                                                    |                                                                                                         |
| 44 |                                                                                                    |                                                                                                         |
| 45 |                                                                                                    |                                                                                                         |
| 46 | 15. Approximate date of start of symptoms (dd/mm/yyyy)                                             | _ _ / _ _ / _ _ _ _                                                                                     |
| 47 |                                                                                                    | <input type="checkbox"/> Unknown                                                                        |
| 48 |                                                                                                    |                                                                                                         |
| 49 |                                                                                                    |                                                                                                         |
| 50 | 16. Locations of care-seeking for this TB episode (Exclude current facility; check all that apply) | <input type="checkbox"/> Primary health care clinic (primary-level)                                     |
| 51 |                                                                                                    | <input type="checkbox"/> Public district/provincial hospital (secondary-level)                          |
| 52 |                                                                                                    | <input type="checkbox"/> Public teaching/referral hospital (tertiary-level)                             |
| 53 |                                                                                                    | <input type="checkbox"/> Private practice                                                               |
| 54 |                                                                                                    | <input type="checkbox"/> Private hospital                                                               |
| 55 |                                                                                                    | <input type="checkbox"/> Pharmacy / dispensary                                                          |
| 56 |                                                                                                    | <input type="checkbox"/> Self-management / self-medication                                              |
| 57 |                                                                                                    | <input type="checkbox"/> Traditional healer                                                             |
| 58 |                                                                                                    | <input type="checkbox"/> Other                                                                          |
| 59 |                                                                                                    |                                                                                                         |
| 60 |                                                                                                    |                                                                                                         |

|                                                                                                              |                                                                                                                                                                                                                                                                                                                                                                                      |
|--------------------------------------------------------------------------------------------------------------|--------------------------------------------------------------------------------------------------------------------------------------------------------------------------------------------------------------------------------------------------------------------------------------------------------------------------------------------------------------------------------------|
|                                                                                                              | <input type="checkbox"/> Unknown                                                                                                                                                                                                                                                                                                                                                     |
| 17. Date of first consultation at any facility (clinic or hospital) for the current TB episode (dd/mm/yyyy)  | <p> _ _ / _ _ / _ _ _ _ </p> <input type="checkbox"/> Unknown                                                                                                                                                                                                                                                                                                                        |
| 18. Number of visits to any health facility (clinic or hospital) during illness course prior to TB diagnosis | <p> _ _ </p> <input type="checkbox"/> Unknown                                                                                                                                                                                                                                                                                                                                        |
| 19. Inpatient hospital admission during current TB illness                                                   | <input type="checkbox"/> Yes<br><input type="checkbox"/> No (SKIP to #21)<br><input type="checkbox"/> Unknown                                                                                                                                                                                                                                                                        |
| 20. If yes, duration of hospitalization (days)                                                               | <p> _ _  days</p> <input type="checkbox"/> Ongoing (return to form to complete duration after discharge)<br><input type="checkbox"/> Unknown                                                                                                                                                                                                                                         |
| 21. Date of TB diagnosis (dd/mm/yyyy)                                                                        | <p> _ _ / _ _ / _ _ _ _ </p>                                                                                                                                                                                                                                                                                                                                                         |
| 22. Patient TB category (WHO/IUATLD)                                                                         | <input type="checkbox"/> New case<br><input type="checkbox"/> Relapse<br><input type="checkbox"/> Treatment after failure<br><input type="checkbox"/> Treatment after loss to follow-up<br><input type="checkbox"/> Transfer in<br><input type="checkbox"/> Other<br><input type="checkbox"/> Unknown                                                                                |
| 23. TB diagnosis (type of TB)                                                                                | <input type="checkbox"/> Pulmonary<br><input type="checkbox"/> Pulmonary and extrapulmonary (specify)<br><input type="checkbox"/> Unknown                                                                                                                                                                                                                                            |
| 24. Extrapulmonary location (Check all that apply)                                                           | <input type="checkbox"/> Lymph node<br><input type="checkbox"/> Pleural<br><input type="checkbox"/> Bone / joint<br><input type="checkbox"/> Genitourinary<br><input type="checkbox"/> Gastrointestinal<br><input type="checkbox"/> Miliary<br><input type="checkbox"/> Meningeal / CNS<br><input type="checkbox"/> Other, please specify: _____<br><input type="checkbox"/> Unknown |
| 25. TB-SRN pulmonary TB diagnostic criteria (Check all that apply)                                           | <input type="checkbox"/> Respiratory symptoms<br><input type="checkbox"/> CXR feature suggestive of PTB<br><input type="checkbox"/> Positive MTB tests on respiratory samples                                                                                                                                                                                                        |
| 26. Microbiological status (Fill detailed test results in TB Lab form)                                       | <input type="checkbox"/> No samples collected<br><input type="checkbox"/> Negative MTB testing only (e.g., smear, Xpert, culture, or LAM; specify results in TB Lab form)                                                                                                                                                                                                            |

|                                                                                                  |                                                                                                                                                                                                         |
|--------------------------------------------------------------------------------------------------|---------------------------------------------------------------------------------------------------------------------------------------------------------------------------------------------------------|
|                                                                                                  | <input type="checkbox"/> Any Positive MTB test result(s) (e.g., smear, Xpert, culture, or LAM; specify results in <b>TB Lab</b> form)<br><input type="checkbox"/> Pending                               |
| 27. Resistance pattern at diagnosis ( <i>Fill detailed tests results in <b>TB Lab</b> form</i> ) | <input type="checkbox"/> Drug-susceptible (DS-TB)<br><input type="checkbox"/> Drug-resistant (DR-TB) – <i>if presumed or known resistance to one or more agents</i><br><input type="checkbox"/> Unknown |
| 28. TB treatment initiation                                                                      | <input type="checkbox"/> Yes (already initiated)<br><input type="checkbox"/> Planned (within 7 days)                                                                                                    |
| 29. Date of TB treatment initiation (dd/mm/yyyy)                                                 | _ _ / _ _ / _ _ _ _                                                                                                                                                                                     |
| 30. Type of TB treatment initiated ( <i>Enter regimen details in <b>TB treatment form</b></i> )  | <input type="checkbox"/> 1st line regimen (DS-TB)<br><input type="checkbox"/> 2nd line regimen (DR-TB)<br><input type="checkbox"/> Other, specify: _____                                                |

Investigator: \_\_\_\_\_ Signature: \_\_\_\_\_ Date |\_|\_|/|\_|\_|/|\_|\_|\_|\_|

For peer review only

1  
2  
3  
4  
5  
6  
7  
8  
9  
10  
11  
12  
13  
14  
15  
16  
17  
18  
19  
20  
21  
22  
23  
24  
25  
26  
27  
28  
29  
30  
31  
32  
33  
34  
35  
36  
37  
38  
39  
40  
41  
42  
43  
44  
45  
46  
47  
48  
49  
50  
51  
52  
53  
54  
55  
56  
57  
58  
59  
60



## [5] MEDICAL HISTORY FORM

|                                                                                                               |                                                                                                                                                                                  |
|---------------------------------------------------------------------------------------------------------------|----------------------------------------------------------------------------------------------------------------------------------------------------------------------------------|
| [5] MEDICAL HISTORY FORM                                                                                      |                                                                                                                                                                                  |
| leDEA/TB SRN ID                                                                                               |                                                                                                                                                                                  |
| Visit                                                                                                         | <input type="checkbox"/> Baseline                                                                                                                                                |
| Visit date (dd/mm/yyyy)                                                                                       | _ _ / _ _ / _ _ _ _                                                                                                                                                              |
| <i>For each of the conditions below, indicate if there is any history of each condition (current or past)</i> |                                                                                                                                                                                  |
| 1. Asthma                                                                                                     | <input type="checkbox"/> Yes<br><input type="checkbox"/> No<br><input type="checkbox"/> Unknown                                                                                  |
| 2. Chronic obstructive pulmonary disease (COPD) or emphysema                                                  | <input type="checkbox"/> Yes<br><input type="checkbox"/> No<br><input type="checkbox"/> Unknown                                                                                  |
| 3. Pulmonary fibrosis or interstitial lung disease                                                            | <input type="checkbox"/> Yes<br><input type="checkbox"/> No<br><input type="checkbox"/> Unknown                                                                                  |
| 4. History of COVID-19                                                                                        | <input type="checkbox"/> Yes (complete COVID-19 test data in <b>Other Lab</b> form)<br><input type="checkbox"/> No (SKIP to #5)<br><input type="checkbox"/> Unknown (SKIP to #5) |
| 4a. Number of COVID-19 diagnosed episodes?                                                                    | _ _  episodes                                                                                                                                                                    |
| 4b. Date of most recent COVID-19 diagnosis (dd/mm/yyyy)                                                       | _ _ / _ _ / _ _ _ _ <br><input type="checkbox"/> Unknown                                                                                                                         |
| 5. Other lung disease                                                                                         | <input type="checkbox"/> Yes<br><input type="checkbox"/> No (SKIP to #6)<br><input type="checkbox"/> Unknown (SKIP to #6)                                                        |
| 5a. If yes, specify lung disease                                                                              | _____                                                                                                                                                                            |
| 6. Hypertension                                                                                               | <input type="checkbox"/> Yes<br><input type="checkbox"/> No (SKIP to #7)<br><input type="checkbox"/> Unknown (SKIP to #7)                                                        |

## IeDEA TB SRN

|                                                                      |                                                   |                                                                                                                                                                                                                                                                                                                                                                                                          |
|----------------------------------------------------------------------|---------------------------------------------------|----------------------------------------------------------------------------------------------------------------------------------------------------------------------------------------------------------------------------------------------------------------------------------------------------------------------------------------------------------------------------------------------------------|
| 1<br>2<br>3<br>4<br>5<br>6<br>7                                      | 6a. Current treatment for hypertension            | <input type="checkbox"/> Yes<br><input type="checkbox"/> No<br><input type="checkbox"/> Unknown                                                                                                                                                                                                                                                                                                          |
| 8<br>9<br>10<br>11<br>12<br>13<br>14<br>15<br>16<br>17<br>18         | 6b. If yes, specify anti-hypertensive medications | <input type="checkbox"/> ACE inhibitors (e.g., enalapril)<br><input type="checkbox"/> Calcium channel blockers (e.g., amlodipine, nifedipine)<br><input type="checkbox"/> Diuretics (e.g., lasix, aldactone, hydrochlorothazide)<br><input type="checkbox"/> Angiotensin receptor blockers (e.g., losartan)<br><input type="checkbox"/> Beta blockers (e.g., atenolol)<br><input type="checkbox"/> Other |
| 19<br>20<br>21<br>22<br>23<br>24                                     | 7. Coronary heart disease                         | <input type="checkbox"/> Yes<br><input type="checkbox"/> No<br><input type="checkbox"/> Unknown                                                                                                                                                                                                                                                                                                          |
| 25<br>26<br>27<br>28<br>29<br>30                                     | 8. Heart failure                                  | <input type="checkbox"/> Yes<br><input type="checkbox"/> No<br><input type="checkbox"/> Unknown                                                                                                                                                                                                                                                                                                          |
| 31<br>32<br>33<br>34<br>35<br>36                                     | 9. Pulmonary hypertension                         | <input type="checkbox"/> Yes<br><input type="checkbox"/> No<br><input type="checkbox"/> Unknown                                                                                                                                                                                                                                                                                                          |
| 37<br>38<br>39<br>40<br>41<br>42                                     | 10. Diabetes                                      | <input type="checkbox"/> Yes<br><input type="checkbox"/> No (SKIP to #11)<br><input type="checkbox"/> Unknown (SKIP to #11)                                                                                                                                                                                                                                                                              |
| 43<br>44<br>45<br>46<br>47<br>48                                     | 10a. Current anti-diabetes treatment              | <input type="checkbox"/> Yes<br><input type="checkbox"/> No (SKIP to #11)<br><input type="checkbox"/> Unknown (SKIP to #11)                                                                                                                                                                                                                                                                              |
| 49<br>50<br>51<br>52<br>53<br>54<br>55<br>56<br>57<br>58<br>59<br>60 | 10b. If yes, specify anti-diabetes medications    | <input type="checkbox"/> Metformin<br><input type="checkbox"/> Glibenclamide<br><input type="checkbox"/> Gliclazide<br><input type="checkbox"/> Insulin<br><input type="checkbox"/> Unknown<br><input type="checkbox"/> Other (specify): _____                                                                                                                                                           |

|                                                                                        |                                                                        |                                                                                                                                                                                                                                                                                                                      |
|----------------------------------------------------------------------------------------|------------------------------------------------------------------------|----------------------------------------------------------------------------------------------------------------------------------------------------------------------------------------------------------------------------------------------------------------------------------------------------------------------|
| 1<br>2<br>3<br>4<br>5<br>6<br>7<br>8<br>9                                              | 10c. If yes, specify route                                             | <input type="checkbox"/> Oral<br><input type="checkbox"/> Injection<br><input type="checkbox"/> Other<br><input type="checkbox"/> Unknown                                                                                                                                                                            |
| 10<br>11<br>12<br>13<br>14<br>15                                                       | 11. Kidney disease                                                     | <input type="checkbox"/> Yes<br><input type="checkbox"/> No (SKIP to #12)<br><input type="checkbox"/> Unknown (SKIP to #12)                                                                                                                                                                                          |
| 16<br>17<br>18<br>19<br>20<br>21                                                       | 11a. If yes, currently on dialysis                                     | <input type="checkbox"/> Yes<br><input type="checkbox"/> No<br><input type="checkbox"/> Unknown                                                                                                                                                                                                                      |
| 22<br>23<br>24<br>25<br>26<br>27<br>28                                                 | 12. Liver disease                                                      | <input type="checkbox"/> Yes<br><input type="checkbox"/> No (SKIP to #13)<br><input type="checkbox"/> Unknown (SKIP to #13)                                                                                                                                                                                          |
| 29<br>30<br>31<br>32<br>33<br>34<br>35<br>36<br>37<br>38<br>39                         | 12a. If yes, type of liver disease.<br><br><i>Check all that apply</i> | <input type="checkbox"/> Cirrhosis<br><input type="checkbox"/> Alcohol related liver disease<br><input type="checkbox"/> Non-alcoholic fatty liver disease<br><input type="checkbox"/> Hepatitis B<br><input type="checkbox"/> Hepatitis C<br><input type="checkbox"/> Other (specify): _____                        |
| 40<br>41<br>42<br>43<br>44<br>45                                                       | 13. Cancer                                                             | <input type="checkbox"/> Yes<br><input type="checkbox"/> No(SKIP to #14)<br><input type="checkbox"/> Unknown (SKIP to #14)                                                                                                                                                                                           |
| 46<br>47<br>48<br>49<br>50<br>51<br>52<br>53<br>54<br>55<br>56<br>57<br>58<br>59<br>60 | 13a. If yes, specify type of cancer                                    | <input type="checkbox"/> Anal<br><input type="checkbox"/> Breast<br><input type="checkbox"/> Colon<br><input type="checkbox"/> Invasive cervical<br><input type="checkbox"/> Kaposi's Sarcoma<br><input type="checkbox"/> Lung<br><input type="checkbox"/> Non-Hodgkin lymphoma<br><input type="checkbox"/> Prostate |

**leDEA TB SRN**

|                                                                                                                                                                                     |                                                                                                                                                                                                                                                                                                                                       |
|-------------------------------------------------------------------------------------------------------------------------------------------------------------------------------------|---------------------------------------------------------------------------------------------------------------------------------------------------------------------------------------------------------------------------------------------------------------------------------------------------------------------------------------|
| <p>1<br/>2<br/>3<br/>4<br/>5<br/>6<br/>7<br/>8<br/>9</p>                                                                                                                            | <p><input type="checkbox"/> Skin: melanoma</p> <p><input type="checkbox"/> Skin: non-melanoma</p> <p><input type="checkbox"/> Unknown</p> <p><input type="checkbox"/> Other _____</p>                                                                                                                                                 |
| <p>10<br/>11<br/>12<br/>13<br/>14<br/>15</p> <p>14. Immunosuppressor history</p>                                                                                                    | <p><input type="checkbox"/> Yes</p> <p><input type="checkbox"/> No (SKIP to #15)</p> <p><input type="checkbox"/> Unknown (SKIP to #15)</p>                                                                                                                                                                                            |
| <p>16<br/>17<br/>18<br/>19<br/>20<br/>21<br/>22<br/>23<br/>24<br/>25<br/>26<br/>27</p> <p>14a. If yes, specify ongoing immunosuppressor treatment</p>                               | <p><input type="checkbox"/> None</p> <p><input type="checkbox"/> Steroid (e.g., prednisone, hydrocortisone)</p> <p><input type="checkbox"/> Biologic (e.g., infliximab, adalimumab, etanercept)</p> <p><input type="checkbox"/> Chemotherapy</p> <p><input type="checkbox"/> Other: _____</p> <p><input type="checkbox"/> Unknown</p> |
| <p>28<br/>29<br/>30<br/>31<br/>32<br/>33</p> <p>15. Disorder of the brain or spinal cord</p>                                                                                        | <p><input type="checkbox"/> Yes</p> <p><input type="checkbox"/> No</p> <p><input type="checkbox"/> Unknown</p>                                                                                                                                                                                                                        |
| <p>34<br/>35<br/>36<br/>37<br/>38<br/>39</p> <p>16. Mental health diagnosis</p>                                                                                                     | <p><input type="checkbox"/> Yes</p> <p><input type="checkbox"/> No (SKIP to #17)</p> <p><input type="checkbox"/> Unknown (SKIP to #17)</p>                                                                                                                                                                                            |
| <p>40<br/>41<br/>42<br/>43<br/>44<br/>45<br/>46<br/>47<br/>48<br/>49<br/>50<br/>51<br/>52</p> <p>16a. If yes, Specify mental health diagnoses<br/><i>(Check all that apply)</i></p> | <p><input type="checkbox"/> Depression</p> <p><input type="checkbox"/> Post-Traumatic Stress Disorder (PTSD)</p> <p><input type="checkbox"/> Anxiety</p> <p><input type="checkbox"/> Substance dependence</p> <p><input type="checkbox"/> Other: _____</p> <p><input type="checkbox"/> Unknown</p>                                    |
| <p>53<br/>54<br/>55<br/>56<br/>57<br/>58<br/>59<br/>60</p> <p>16b. Receiving counseling for mental health diagnos(es)</p>                                                           | <p><input type="checkbox"/> Yes</p> <p><input type="checkbox"/> No</p> <p><input type="checkbox"/> Unknown</p>                                                                                                                                                                                                                        |

1  
2  
3  
4  
5  
6  
7  
8  
9  
10  
11  
12  
13  
14  
15  
16  
17  
18  
19  
20  
21  
22  
23  
24  
25  
26  
27  
28  
29  
30  
31  
32  
33  
34  
35  
36  
37  
38  
39  
40  
41  
42  
43  
44  
45  
46  
47  
48  
49  
50  
51  
52  
53  
54  
55  
56  
57  
58  
59  
60

|                                                                   |                                                                                                                             |
|-------------------------------------------------------------------|-----------------------------------------------------------------------------------------------------------------------------|
| 16c. Receiving medication for mental health diagnos(es)           | <input type="checkbox"/> Yes<br><input type="checkbox"/> No<br><input type="checkbox"/> Unknown                             |
| 17. Other health condition                                        | <input type="checkbox"/> Yes<br><input type="checkbox"/> No (SKIP to #18)<br><input type="checkbox"/> Unknown (SKIP to #18) |
| 17a. Specify health condition(s).                                 | <hr/> <hr/> <hr/> <hr/>                                                                                                     |
| 18. Notes on medical history<br><i>(Optional free text notes)</i> | <hr/> <hr/> <hr/> <hr/> <hr/> <hr/>                                                                                         |

view only

Investigator: \_\_\_\_\_ Signature: \_\_\_\_\_ Date |\_|\_| / |\_|\_| / |\_|\_|\_|\_|

**leDEA TB SRN**

| [6] HIV History                                               |                                                                                                                                                                                                                                                                                                                           |
|---------------------------------------------------------------|---------------------------------------------------------------------------------------------------------------------------------------------------------------------------------------------------------------------------------------------------------------------------------------------------------------------------|
| <b>leDEA/TB SRN ID</b>                                        |                                                                                                                                                                                                                                                                                                                           |
| Type of visit                                                 | <input type="checkbox"/> Baseline                                                                                                                                                                                                                                                                                         |
| Visit date (dd/mm/yyyy)                                       | _ _ / _ _ / _ _ _ _                                                                                                                                                                                                                                                                                                       |
| <b>HIV testing</b>                                            |                                                                                                                                                                                                                                                                                                                           |
| 1. Date of most recent HIV test (dd/mm/yyyy)                  | _ _ / _ _ / _ _ _ _  or <input type="checkbox"/> Not yet done                                                                                                                                                                                                                                                             |
| 2. HIV status                                                 | <input type="checkbox"/> Positive (enter result in <b>Other Lab</b> form)<br><input type="checkbox"/> HIV testing planned (results to report in <b>Other Lab</b> form; if found to be positive, return to complete HIV care section below)<br><input type="checkbox"/> Negative within 90 days (if negative, SKIP to END) |
| <b>HIV care (if HIV positive)</b>                             |                                                                                                                                                                                                                                                                                                                           |
| 3. Date of HIV diagnosis (dd/mm/yyyy)                         | _ _ / _ _ / _ _ _ _                                                                                                                                                                                                                                                                                                       |
| 4. Enrolment into HIV care                                    | <input type="checkbox"/> Yes<br><input type="checkbox"/> No (SKIP to #6)<br><input type="checkbox"/> Unknown                                                                                                                                                                                                              |
| 5. Date of enrolment in HIV care (dd/mm/yyyy)                 | _ _ / _ _ / _ _ _ _                                                                                                                                                                                                                                                                                                       |
| 6. Previous hospitalizations for HIV complications            | <input type="checkbox"/> Yes<br><input type="checkbox"/> No (SKIP to #8)<br><input type="checkbox"/> Unknown                                                                                                                                                                                                              |
| 7. Date of most recent hospital discharge (dd/mm/yyyy)        | _ _ / _ _ / _ _ _ _                                                                                                                                                                                                                                                                                                       |
| 8. WHO stage (highest, prior to TB)                           | <input type="checkbox"/> 1 (SKIP to #14)<br><input type="checkbox"/> 2<br><input type="checkbox"/> 3<br><input type="checkbox"/> 4<br><input type="checkbox"/> Not applicable (using CDC staging)<br><input type="checkbox"/> Unknown                                                                                     |
| 9. CDC stage (highest, prior to TB)                           | <input type="checkbox"/> 1 (SKIP to #14)<br><input type="checkbox"/> 2<br><input type="checkbox"/> 3<br><input type="checkbox"/> Not applicable (using WHO staging)<br><input type="checkbox"/> Unknown                                                                                                                   |
| 10. CDC/WHO stage defining illness #1 (other than current TB) | .....<br><input type="checkbox"/> Past/resolved <input type="checkbox"/> Ongoing <input type="checkbox"/> Unknown                                                                                                                                                                                                         |

## IeDEA TB SRN

|                                                                  |                                                                                                                   |
|------------------------------------------------------------------|-------------------------------------------------------------------------------------------------------------------|
| 11. CDC/WHO stage defining illness #2<br>(other than current TB) | .....<br><input type="checkbox"/> Past/resolved <input type="checkbox"/> Ongoing <input type="checkbox"/> Unknown |
| 12. CDC/WHO stage defining illness #3<br>(other than current TB) | .....<br><input type="checkbox"/> Past/resolved <input type="checkbox"/> Ongoing <input type="checkbox"/> Unknown |
| 13. CDC/WHO stage defining illness #4<br>(other than current TB) | .....<br><input type="checkbox"/> Past/resolved <input type="checkbox"/> Ongoing <input type="checkbox"/> Unknown |
| 14. Currently on cotrimoxazole                                   | <input type="checkbox"/> Yes<br><input type="checkbox"/> No<br><input type="checkbox"/> Unknown                   |
| 15. ART initiated                                                | <input type="checkbox"/> Yes<br><input type="checkbox"/> No (SKIP to END)<br><input type="checkbox"/> Unknown     |
| 16. ART initiation date<br>(dd/mm/yyyy)                          | _ _ / _ _ / _ _ _ _                                                                                               |
| 17. Currently on ART (fill <b>ART form</b> )                     | <input type="checkbox"/> Yes<br><input type="checkbox"/> No                                                       |

Reminder to complete the **Other Lab Results** form (for HIV-related labs) and **ART form**!

Investigator: \_\_\_\_\_ Signature: \_\_\_\_\_ Date |\_|\_|/|\_|\_|/|\_|\_|\_|\_|

[7] PREGNANCY / POST-PARTUM HISTORY and UPDATES

|                                                                                                                                                       |                                                                                                                                                                                                                                                                                                  |
|-------------------------------------------------------------------------------------------------------------------------------------------------------|--------------------------------------------------------------------------------------------------------------------------------------------------------------------------------------------------------------------------------------------------------------------------------------------------|
| leDEA/TB SRN ID                                                                                                                                       |                                                                                                                                                                                                                                                                                                  |
| Visit                                                                                                                                                 | <input type="checkbox"/> Baseline<br><input type="checkbox"/> End of Tx<br><input type="checkbox"/> 6-M Post-Tx<br><input type="checkbox"/> 12-M Post-Tx<br><input type="checkbox"/> Tx F/R/W                                                                                                    |
| Visit date (dd/mm/yyyy)                                                                                                                               | _ _ / _ _ / _ _ _ _                                                                                                                                                                                                                                                                              |
| <b>Baseline Questions (If NOT Baseline, SKIP to #4)</b>                                                                                               |                                                                                                                                                                                                                                                                                                  |
| 1. Ever pregnant, currently or in the past (baseline)                                                                                                 | <input type="checkbox"/> Yes<br><input type="checkbox"/> No (SKIP to #6)<br><input type="checkbox"/> Unknown                                                                                                                                                                                     |
| 2. If yes, number of pregnancies (including current pregnancy if pregnant) (baseline)                                                                 | _ _                                                                                                                                                                                                                                                                                              |
| 3. If yes, number of live born infants (baseline)                                                                                                     | _ _                                                                                                                                                                                                                                                                                              |
| <b>Pregnancy Status</b>                                                                                                                               |                                                                                                                                                                                                                                                                                                  |
| 4. Currently pregnant                                                                                                                                 | <input type="checkbox"/> Yes (complete <b>Pregnancy and Infant Outcomes</b> form, or update existing form)<br><input type="checkbox"/> No<br><input type="checkbox"/> Unknown                                                                                                                    |
| 5. Recent pregnancy or delivery<br>(For pregnancy ending in the <b>12 months prior to study enrolment, or any time thereafter.</b> )                  | <input type="checkbox"/> Yes (complete a separate <b>Pregnancy and Infant Outcomes</b> form for each pregnancy in this time period, or update existing form)<br><input type="checkbox"/> No<br><input type="checkbox"/> Unknown                                                                  |
| 6. Able to be pregnant in the future?                                                                                                                 | <input type="checkbox"/> Yes<br><input type="checkbox"/> No (e.g., hysterectomy, tubal ligation, menopause) → Do not need to ask pregnancy questions at future visits. <b>At future visits, update infant outcomes for recent pregnancies if applicable.</b><br><input type="checkbox"/> Unknown |
| <b>For each recent or ongoing pregnancy, complete a separate Pregnancy and Infant Outcomes form, which will be updated at subsequent study visits</b> |                                                                                                                                                                                                                                                                                                  |

Investigator: \_\_\_\_\_ Signature: \_\_\_\_\_ Date |\_|\_|/|\_|\_|/|\_|\_|\_|\_|

ID Number \_\_\_\_\_ For peer review only - <http://bmjopen.bmj.com/site/about/guidelines.xhtml> Pregnancy Hx Page 1 of 1



| [8] PREGNANCY and INFANT OUTCOMES                                                                                                                                                                                                                                                                                                                                                                                                                               |                                                                                                                                                                                                                                                                                                                                                          |                                    |                   |
|-----------------------------------------------------------------------------------------------------------------------------------------------------------------------------------------------------------------------------------------------------------------------------------------------------------------------------------------------------------------------------------------------------------------------------------------------------------------|----------------------------------------------------------------------------------------------------------------------------------------------------------------------------------------------------------------------------------------------------------------------------------------------------------------------------------------------------------|------------------------------------|-------------------|
| IeDEA/TB SRN ID                                                                                                                                                                                                                                                                                                                                                                                                                                                 |                                                                                                                                                                                                                                                                                                                                                          |                                    |                   |
| Visit                                                                                                                                                                                                                                                                                                                                                                                                                                                           | Date (dd/mm/yyyy)                                                                                                                                                                                                                                                                                                                                        | Visit                              | Date (dd/mm/yyyy) |
| <input type="checkbox"/> Baseline                                                                                                                                                                                                                                                                                                                                                                                                                               | ____/____/____                                                                                                                                                                                                                                                                                                                                           | <input type="checkbox"/> End of Tx | ____/____/____    |
| <input type="checkbox"/> 6-M Post-Tx                                                                                                                                                                                                                                                                                                                                                                                                                            | ____/____/____                                                                                                                                                                                                                                                                                                                                           | <input type="checkbox"/> Tx F/R/W  | ____/____/____    |
| <b>Recent or Ongoing Pregnancy History and Outcomes</b>                                                                                                                                                                                                                                                                                                                                                                                                         |                                                                                                                                                                                                                                                                                                                                                          |                                    |                   |
| <ul style="list-style-type: none"> <li>Time period: <u>begin with any pregnancy ending &lt;12 months before enrollment, and continue recording any pregnancy thereafter during the study.</u></li> <li>If <b>multiple pregnancies</b>, complete a <b>separate form for each pregnancy</b> and associated infant outcomes for all infants.</li> <li><b>Revisit and update details</b>, including for new pregnancies, during subsequent study visits.</li> </ul> |                                                                                                                                                                                                                                                                                                                                                          |                                    |                   |
| 1. Pregnancy number<br><i>(Complete a separate form for each pregnancy ending &lt;12 months prior to enrollment or any time thereafter.)</i>                                                                                                                                                                                                                                                                                                                    | ____                                                                                                                                                                                                                                                                                                                                                     |                                    |                   |
| 2. Outcome of recent pregnancy                                                                                                                                                                                                                                                                                                                                                                                                                                  | <input type="checkbox"/> Ongoing<br><input type="checkbox"/> Born alive<br><input type="checkbox"/> Stillborn<br><input type="checkbox"/> Spontaneous abortion (miscarriage)<br><input type="checkbox"/> Induced abortion<br><input type="checkbox"/> Unknown                                                                                            |                                    |                   |
| 3. If ongoing, Date of last menstrual period (LMP)                                                                                                                                                                                                                                                                                                                                                                                                              | ____/____/____<br><input type="checkbox"/> Unknown                                                                                                                                                                                                                                                                                                       |                                    |                   |
| 4. If ongoing pregnancy, estimated date of delivery (EDD)                                                                                                                                                                                                                                                                                                                                                                                                       | ____/____/____<br><input type="checkbox"/> Unknown                                                                                                                                                                                                                                                                                                       |                                    |                   |
| 5. If pregnancy ended, date of delivery or other outcome                                                                                                                                                                                                                                                                                                                                                                                                        | ____/____/____<br><input type="checkbox"/> Unknown                                                                                                                                                                                                                                                                                                       |                                    |                   |
| 6. If born alive, term at delivery                                                                                                                                                                                                                                                                                                                                                                                                                              | <input type="checkbox"/> Full term (37 to 41 weeks)<br><input type="checkbox"/> Post-term (≥42 weeks)<br><input type="checkbox"/> Pre-term 34 to 36 weeks<br><input type="checkbox"/> Pre-term < 34 weeks<br><input type="checkbox"/> Unknown                                                                                                            |                                    |                   |
| 7. Did you receive any of these during pregnancy? (Check all that apply.)                                                                                                                                                                                                                                                                                                                                                                                       | <input type="checkbox"/> TB preventive therapy<br><input type="checkbox"/> TB treatment<br><input type="checkbox"/> ART (HIV treatment, if applicable)<br><input type="checkbox"/> None<br><input type="checkbox"/> Unsure/Unknown                                                                                                                       |                                    |                   |
| 8. Conditions or complications during pregnancy                                                                                                                                                                                                                                                                                                                                                                                                                 | <input type="checkbox"/> Anemia, or having lower than the normal number of red blood cells<br><input type="checkbox"/> High blood pressure, swelling, or protein in the urine<br><input type="checkbox"/> Diabetes, or elevated blood sugar<br><input type="checkbox"/> Urinary tract infection(s)<br><input type="checkbox"/> Other infection(s): _____ |                                    |                   |

**IeDEA TB SRN**

|                                                                                                                                                |                                                                                                                                                                                                                                                                                                                                                                                                                                                                                                                                                                                                                                                                            |
|------------------------------------------------------------------------------------------------------------------------------------------------|----------------------------------------------------------------------------------------------------------------------------------------------------------------------------------------------------------------------------------------------------------------------------------------------------------------------------------------------------------------------------------------------------------------------------------------------------------------------------------------------------------------------------------------------------------------------------------------------------------------------------------------------------------------------------|
|                                                                                                                                                | <input type="checkbox"/> Symptoms of depression (low or sad mood; lost interest in activities; changes in appetite, sleep, and energy; feelings of worthlessness, shame or guilt; thoughts that life is not worth living)<br><input type="checkbox"/> Other medical problem for the mother: _____<br><input type="checkbox"/> Problem with the baby noted during pregnancy: _____<br><input type="checkbox"/> Preterm (early) labor<br><input type="checkbox"/> Bleeding<br><input type="checkbox"/> Other: _____<br><input type="checkbox"/> None<br><input type="checkbox"/> Unsure/Unknown                                                                              |
| 9. Conditions or complications for the infant after delivery                                                                                   | <input type="checkbox"/> Pre-term birth (<37 weeks)<br><input type="checkbox"/> Low birth weight (<2500 g)<br><input type="checkbox"/> Low blood sugar<br><input type="checkbox"/> Jaundice<br><input type="checkbox"/> Birth defects<br><input type="checkbox"/> Birth injuries<br><input type="checkbox"/> Breathing problems<br><input type="checkbox"/> Slow growth / failure to thrive<br><input type="checkbox"/> Developmental delay<br><input type="checkbox"/> Neurologic problems<br><input type="checkbox"/> Other medical problems: _____<br><input type="checkbox"/> Other: _____<br><input type="checkbox"/> None<br><input type="checkbox"/> Unsure/Unknown |
| <b>Infant Live Status and TB treatment/TPT</b>                                                                                                 |                                                                                                                                                                                                                                                                                                                                                                                                                                                                                                                                                                                                                                                                            |
| 10. Number of infants born alive for <u>this pregnancy</u><br><i>(Infants from different pregnancies should be recorded on separate form.)</i> | _                                                                                                                                                                                                                                                                                                                                                                                                                                                                                                                                                                                                                                                                          |
| 11. TB treatment for infant 1                                                                                                                  | <input type="checkbox"/> Yes<br><input type="checkbox"/> No<br><input type="checkbox"/> Unknown                                                                                                                                                                                                                                                                                                                                                                                                                                                                                                                                                                            |
| 12. TB prevention therapy for infant 1                                                                                                         | <input type="checkbox"/> Yes<br><input type="checkbox"/> No<br><input type="checkbox"/> Unknown                                                                                                                                                                                                                                                                                                                                                                                                                                                                                                                                                                            |
| 13. Infant 1 status at 12 months of life or by 12Mo Post-Tx visits                                                                             | <input type="checkbox"/> Alive at ≥12 months of age<br><input type="checkbox"/> Alive, not yet 12 months of age (update at future visit)<br><input type="checkbox"/> Deceased<br><input type="checkbox"/> Unknown                                                                                                                                                                                                                                                                                                                                                                                                                                                          |
| 14. Cause of infant 1 death, if known                                                                                                          | <input type="checkbox"/> Diagnosed TB<br><input type="checkbox"/> Pneumonia / lung infection<br><input type="checkbox"/> Other infectious cause: _____<br><input type="checkbox"/> Other non-infectious cause: _____<br><input type="checkbox"/> Decline to answer<br><input type="checkbox"/> Unknown                                                                                                                                                                                                                                                                                                                                                                     |
| 15. TB treatment for infant 2                                                                                                                  | <input type="checkbox"/> Yes<br><input type="checkbox"/> No                                                                                                                                                                                                                                                                                                                                                                                                                                                                                                                                                                                                                |

## IeDEA TB SRN

|    |                                     |                                                                                   |
|----|-------------------------------------|-----------------------------------------------------------------------------------|
| 1  |                                     | <input type="checkbox"/> Unknown                                                  |
| 2  |                                     |                                                                                   |
| 3  | 16. TB prevention therapy for       | <input type="checkbox"/> Yes                                                      |
| 4  | infant 2                            | <input type="checkbox"/> No                                                       |
| 5  |                                     | <input type="checkbox"/> Unknown                                                  |
| 6  | 17. Infant 2 status at 12 months of | <input type="checkbox"/> Alive at $\geq 12$ months of age                         |
| 7  | life or by 12Mo Post-Tx visits      | <input type="checkbox"/> Alive, not yet 12 months of age (update at future visit) |
| 8  |                                     | <input type="checkbox"/> Deceased                                                 |
| 9  |                                     | <input type="checkbox"/> Unknown                                                  |
| 10 | 18. Cause of infant 2 death, if     | <input type="checkbox"/> Diagnosed TB                                             |
| 11 | known                               | <input type="checkbox"/> Pneumonia / lung infection                               |
| 12 |                                     | <input type="checkbox"/> Other infectious cause: _____                            |
| 13 |                                     | _____                                                                             |
| 14 |                                     | <input type="checkbox"/> Other non-infectious cause: _____                        |
| 15 |                                     | _____                                                                             |
| 16 |                                     | <input type="checkbox"/> Decline to answer                                        |
| 17 |                                     | <input type="checkbox"/> Unknown                                                  |
| 18 |                                     |                                                                                   |
| 19 | 19. TB treatment for infant 3       | <input type="checkbox"/> Yes                                                      |
| 20 |                                     | <input type="checkbox"/> No                                                       |
| 21 |                                     | <input type="checkbox"/> Unknown                                                  |
| 22 | 20. TB prevention therapy for       | <input type="checkbox"/> Yes                                                      |
| 23 | infant 3                            | <input type="checkbox"/> No                                                       |
| 24 |                                     | <input type="checkbox"/> Unknown                                                  |
| 25 | 21. Infant 3 status at 12 months of | <input type="checkbox"/> Alive at $\geq 12$ months of age                         |
| 26 | life or by 12Mo Post-Tx visits      | <input type="checkbox"/> Alive, not yet 12 months of age (update at future visit) |
| 27 |                                     | <input type="checkbox"/> Deceased                                                 |
| 28 |                                     | <input type="checkbox"/> Unknown                                                  |
| 29 |                                     |                                                                                   |
| 30 | 22. Cause of infant 3 death, if     | <input type="checkbox"/> Diagnosed TB                                             |
| 31 | known                               | <input type="checkbox"/> Pneumonia / lung infection                               |
| 32 |                                     | <input type="checkbox"/> Other infectious cause: _____                            |
| 33 |                                     | _____                                                                             |
| 34 |                                     | <input type="checkbox"/> Other non-infectious cause: _____                        |
| 35 |                                     | _____                                                                             |
| 36 |                                     | <input type="checkbox"/> Decline to answer                                        |
| 37 |                                     | <input type="checkbox"/> Unknown                                                  |
| 38 |                                     |                                                                                   |

Investigator: \_\_\_\_\_ Signature: \_\_\_\_\_ Date |\_|\_| / |\_|\_| / |\_|\_|\_|\_|

| [9] VISIT AND CLINICAL EVALUATION                                       |                                                                                                                                                                                                                                                                                            |
|-------------------------------------------------------------------------|--------------------------------------------------------------------------------------------------------------------------------------------------------------------------------------------------------------------------------------------------------------------------------------------|
| <b>leDEA/TB SRN ID</b>                                                  |                                                                                                                                                                                                                                                                                            |
| Visit                                                                   | <input type="checkbox"/> Baseline<br><input type="checkbox"/> Month 1<br><input type="checkbox"/> Month 2<br><input type="checkbox"/> End of Tx<br><input type="checkbox"/> 6-M Post-Tx<br><input type="checkbox"/> 12-M Post-Tx<br><input type="checkbox"/> Tx F/R/W                      |
| Visit Date (dd/mm/yyyy)                                                 | <div style="border: 1px solid black; padding: 2px;">              _ _  /  _ _  /  _ _ _ _            </div>                                                                                                                                                                                |
| <b>Details on type of visit</b>                                         |                                                                                                                                                                                                                                                                                            |
| 1. Visit type                                                           | <input type="checkbox"/> In-person visit<br><input type="checkbox"/> Phone visit<br><input type="checkbox"/> Data abstraction without patient contact<br><input type="checkbox"/> Not performed                                                                                            |
| 2. Reasons for visit not performed                                      | <input type="checkbox"/> Lost to follow up (from study)<br><input type="checkbox"/> Withdrawn<br><input type="checkbox"/> Transferred out<br><input type="checkbox"/> Death<br><input type="checkbox"/> Missed visit<br><input type="checkbox"/> Other<br><input type="checkbox"/> Unknown |
| 3. If missed visit, provide details                                     | .....<br>.....<br>.....                                                                                                                                                                                                                                                                    |
| 4. If patient is lost to follow up from study, provide details if known | .....<br>.....                                                                                                                                                                                                                                                                             |
| 5. Any adverse event to report since last visit or today                | <input type="checkbox"/> Yes<br><input type="checkbox"/> No                                                                                                                                                                                                                                |
| <b>Tx F/R/W visit only</b>                                              |                                                                                                                                                                                                                                                                                            |
| 6. Reason for Tx F/R/W study visit                                      | <input type="checkbox"/> TB Tx failure<br><input type="checkbox"/> TB recurrence assessment (SKIP TO #8)<br><input type="checkbox"/> Withdrawal requested by patient (SKIP TO #9)                                                                                                          |
| 7. TB Tx failure                                                        | <input type="checkbox"/> Confirmed (fill a <b>Treatment Outcomes</b> form)<br><input type="checkbox"/> Suspected, not confirmed<br><input type="checkbox"/> Alternative diagnosis (specify)<br>.....                                                                                       |
| 8. TB recurrence                                                        | <input type="checkbox"/> Confirmed (fill a <b>TB History and Current TB Diagnosis</b> form and a <b>Treatment Outcomes</b> form)<br><input type="checkbox"/> Suspected, not confirmed<br><input type="checkbox"/> Alternative diagnosis (specify) .....                                    |

|                      |                                                                                       |                                                                                                                     |
|----------------------|---------------------------------------------------------------------------------------|---------------------------------------------------------------------------------------------------------------------|
| 1<br>2<br>3<br>4     | 9. Reason for withdrawal<br>(collected only if patient agrees)                        | .....                                                                                                               |
| 5                    | <b>Baseline TB symptoms (within the past 4 weeks) – at Baseline visit only</b>        |                                                                                                                     |
| 6<br>7<br>8<br>9     | 10. Cough                                                                             | <input type="checkbox"/> Yes<br><input type="checkbox"/> No<br><input type="checkbox"/> Unknown                     |
| 10<br>11             | 10a. If yes, cough duration (weeks)                                                   | _ _                                                                                                                 |
| 12<br>13<br>14<br>15 | 10b. If yes, presence of blood (haemoptysis)                                          | <input type="checkbox"/> Yes<br><input type="checkbox"/> No<br><input type="checkbox"/> Unknown                     |
| 16<br>17<br>18<br>19 | 11. Fever                                                                             | <input type="checkbox"/> Yes<br><input type="checkbox"/> No<br><input type="checkbox"/> Unknown                     |
| 20<br>21             | 11a. If yes, fever duration (weeks)                                                   | _ _                                                                                                                 |
| 22<br>23<br>24<br>25 | 12. Night sweats                                                                      | <input type="checkbox"/> Yes<br><input type="checkbox"/> No<br><input type="checkbox"/> Unknown                     |
| 26<br>27<br>28<br>29 | 13. Weight loss                                                                       | <input type="checkbox"/> Yes<br><input type="checkbox"/> No<br><input type="checkbox"/> Unknown                     |
| 30<br>31<br>32<br>33 | 14. Chest pain                                                                        | <input type="checkbox"/> Yes<br><input type="checkbox"/> No<br><input type="checkbox"/> Unknown                     |
| 34<br>35<br>36<br>37 | 15. Dyspnea / shortness of breath                                                     | <input type="checkbox"/> Yes<br><input type="checkbox"/> No<br><input type="checkbox"/> Unknown                     |
| 38<br>39<br>40<br>41 | 16. Tiredness or fatigue                                                              | <input type="checkbox"/> Yes<br><input type="checkbox"/> No<br><input type="checkbox"/> Unknown                     |
| 42<br>43<br>44<br>45 | 17. Loss of appetite                                                                  | <input type="checkbox"/> Yes<br><input type="checkbox"/> No<br><input type="checkbox"/> Unknown                     |
| 46<br>47<br>48<br>49 | 18. Abdominal pain                                                                    | <input type="checkbox"/> Yes<br><input type="checkbox"/> No<br><input type="checkbox"/> Unknown                     |
| 50                   | <b>Symptoms experienced at current visit – at all visits AFTER the baseline visit</b> |                                                                                                                     |
| 51<br>52             | 19. Cough                                                                             | <input type="checkbox"/> Yes<br><input type="checkbox"/> No                                                         |
| 53<br>54<br>55<br>56 | 19a. If yes, change since previous visit                                              | <input type="checkbox"/> Improved<br><input type="checkbox"/> Worsened or new<br><input type="checkbox"/> No change |
| 57<br>58<br>59       | 19b. If yes, presence of blood (haemoptysis)                                          | <input type="checkbox"/> Yes<br><input type="checkbox"/> No<br><input type="checkbox"/> Unknown                     |
| 60                   | 20. Fever                                                                             | <input type="checkbox"/> Yes                                                                                        |

|                                                 |                                                                                                                     |
|-------------------------------------------------|---------------------------------------------------------------------------------------------------------------------|
|                                                 | <input type="checkbox"/> No                                                                                         |
| 20a. If yes, change since previous visit        | <input type="checkbox"/> Improved<br><input type="checkbox"/> Worsened or new<br><input type="checkbox"/> No change |
| 21. Night sweats                                | <input type="checkbox"/> Yes<br><input type="checkbox"/> No                                                         |
| 21a. If yes, change since previous visit        | <input type="checkbox"/> Improved<br><input type="checkbox"/> Worsened or new<br><input type="checkbox"/> No change |
| 22. Weight loss                                 | <input type="checkbox"/> Yes<br><input type="checkbox"/> No                                                         |
| 22a. If yes, change since previous visit        | <input type="checkbox"/> Improved<br><input type="checkbox"/> Worsened or new<br><input type="checkbox"/> No change |
| 23. Chest pain                                  | <input type="checkbox"/> Yes<br><input type="checkbox"/> No                                                         |
| 23a. If yes, change since previous visit        | <input type="checkbox"/> Improved<br><input type="checkbox"/> Worsened or new<br><input type="checkbox"/> No change |
| 24. Dyspnea/shortness of breath                 | <input type="checkbox"/> Yes<br><input type="checkbox"/> No                                                         |
| 24a. If yes, change since previous visit        | <input type="checkbox"/> Improved<br><input type="checkbox"/> Worsened or new<br><input type="checkbox"/> No change |
| 25. Tiredness or fatigue                        | <input type="checkbox"/> Yes<br><input type="checkbox"/> No                                                         |
| 25a. If yes, change since previous visit        | <input type="checkbox"/> Improved<br><input type="checkbox"/> Worsened or new<br><input type="checkbox"/> No change |
| 26. Loss of appetite                            | <input type="checkbox"/> Yes<br><input type="checkbox"/> No                                                         |
| 26a. If yes, change since previous visit        | <input type="checkbox"/> Improved<br><input type="checkbox"/> Worsened or new<br><input type="checkbox"/> No change |
| 27. Abdominal pain                              | <input type="checkbox"/> Yes<br><input type="checkbox"/> No                                                         |
| 27a. If yes, change since previous visit        | <input type="checkbox"/> Improved<br><input type="checkbox"/> Worsened or new<br><input type="checkbox"/> No change |
| <b>Vital signs</b>                              |                                                                                                                     |
| 28. Temperature (°Celsius)                      | _ _ . _                                                                                                             |
| 29. Height (m)<br>(for adults at baseline only) | _ . _ _  m                                                                                                          |
| 30. Weight (kgs)                                | _ _ _ . _  kg                                                                                                       |
| 31. Systolic blood pressure (mmHg)              | _ _ _                                                                                                               |

|                                                                                        |                                                                                                                                         |
|----------------------------------------------------------------------------------------|-----------------------------------------------------------------------------------------------------------------------------------------|
| 32. Diastolic blood pressure (mmHg)                                                    | _ _ _                                                                                                                                   |
| 33. Heart rate (beats/min)                                                             | _ _ _                                                                                                                                   |
| 34. Respiratory rate (breaths/min)                                                     | _ _                                                                                                                                     |
| 35. SpO2 (%)                                                                           | _ _                                                                                                                                     |
| 35a. On oxygen when SpO2 measured                                                      | <input type="checkbox"/> Yes <input type="checkbox"/> No                                                                                |
| <b>Physical signs</b>                                                                  |                                                                                                                                         |
| 36. Respiratory distress (grunting, nose flaring, chest indrawing, sweating, cyanosis) | <input type="checkbox"/> Yes <input type="checkbox"/> No                                                                                |
| 37. Crackles on pulmonary auscultation                                                 | <input type="checkbox"/> Yes <input type="checkbox"/> No                                                                                |
| 38. Wheezing on pulmonary auscultation                                                 | <input type="checkbox"/> Yes <input type="checkbox"/> No                                                                                |
| 39. Decreased lung sounds on auscultation                                              | <input type="checkbox"/> Yes <input type="checkbox"/> No                                                                                |
| 40. Skin rash                                                                          | <input type="checkbox"/> Yes (complete <b>Adverse Event</b> form)<br><input type="checkbox"/> No                                        |
| 41. Hepatomegaly                                                                       | <input type="checkbox"/> Yes (complete <b>Adverse Event</b> form)<br><input type="checkbox"/> No                                        |
| 41a. If yes, measurement below the costal margin (cm)                                  | _ _  cm                                                                                                                                 |
| 42. Cervical or supra-clavicular lymphadenopathy                                       | <input type="checkbox"/> No<br><input type="checkbox"/> Single<br><input type="checkbox"/> Multiple<br><input type="checkbox"/> Unknown |
| 43. Neurological symptoms                                                              | <input type="checkbox"/> Yes<br><input type="checkbox"/> No<br><input type="checkbox"/> Unknown                                         |
| 43a. If yes, detail symptoms                                                           | .....<br>.....<br>.....<br>.....                                                                                                        |

Investigator: \_\_\_\_\_ Signature: \_\_\_\_\_ Date |\_|\_| / |\_|\_| / |\_|\_|\_|\_|

1  
2  
3  
4  
5  
6  
7  
8  
9  
10  
11  
12  
13  
14  
15  
16  
17  
18  
19  
20  
21  
22  
23  
24  
25  
26  
27  
28  
29  
30  
31  
32  
33  
34  
35  
36  
37  
38  
39  
40  
41  
42  
43  
44  
45  
46  
47  
48  
49  
50  
51  
52  
53  
54  
55  
56  
57  
58  
59  
60

## CRF [10] ASSIST

The Alcohol, Smoking and Substance Involvement Screening Test is a validated assessment of substance use. Due to copyright restrictions, this CRF is not included in this packet.



## IeDEA TB SRN

| [11] ADDITIONAL SMOKING HISTORY                                                                                           |                                                                                                                                                                                                                                                                                                                                                                   |
|---------------------------------------------------------------------------------------------------------------------------|-------------------------------------------------------------------------------------------------------------------------------------------------------------------------------------------------------------------------------------------------------------------------------------------------------------------------------------------------------------------|
| IeDEA/TB SRN ID                                                                                                           |                                                                                                                                                                                                                                                                                                                                                                   |
| Visit                                                                                                                     | <input type="checkbox"/> Baseline<br><input type="checkbox"/> End of Tx<br><input type="checkbox"/> 12-M Post-Tx<br><input type="checkbox"/> Tx F/R/W                                                                                                                                                                                                             |
| Visit date (dd/mm/yyyy)                                                                                                   | _ _ / _ _ / _ _ _ _                                                                                                                                                                                                                                                                                                                                               |
| 1. Do you currently smoke tobacco?<br>(This and the following questions also include <i>vaping</i> as a form of smoking.) | <input type="checkbox"/> Yes → SKIP to #4<br><input type="checkbox"/> No → SKIP to #2                                                                                                                                                                                                                                                                             |
| 2. If no, have you ever smoked tobacco in the past?                                                                       | <input type="checkbox"/> Yes → SKIP to #3<br><input type="checkbox"/> No / Never-smoker → END of Form                                                                                                                                                                                                                                                             |
| 3. If you stopped smoking, how long ago did you last smoke tobacco?                                                       | _ _  Days<br> _ _  Months<br> _ _  Years<br><input type="checkbox"/> Unknown                                                                                                                                                                                                                                                                                      |
| 4. For approximately how many years have you (did you) smoke?                                                             | _ _  Years<br><input type="checkbox"/> Unknown                                                                                                                                                                                                                                                                                                                    |
| 5. If you smoke(d) cigarettes, how many cigarettes do you (did you) smoke during a typical day?                           | <input type="checkbox"/> <1<br><input type="checkbox"/> 1-4<br><input type="checkbox"/> 5-10<br><input type="checkbox"/> 11-20<br><input type="checkbox"/> 21-30<br><input type="checkbox"/> 31-40<br><input type="checkbox"/> More than 40<br><input type="checkbox"/> Have taken other forms of tobacco, but not cigarettes<br><input type="checkbox"/> Unknown |

Investigator: \_\_\_\_\_ Signature: \_\_\_\_\_ Date |\_|\_|/|\_|\_|/|\_|\_|\_|\_|

ID Number \_\_\_\_\_  
v1.0 26Jul2022

Additional Smoking Hx Page 1 of 1

For peer review only - <http://bmjopen.bmj.com/site/about/guidelines.xhtml>

### CRF [12] SGRQ

The Saint George Respiratory Questionnaire is a validated measure of the perceived impact of respiratory symptoms on the patient's daily quality of life. Due to copyright restrictions, this CRF is not included in this packet.

1  
2  
3  
4  
5  
6  
7  
8  
9  
10  
11  
12  
13  
14  
15  
16  
17  
18  
19  
20  
21  
22  
23  
24  
25  
26  
27  
28  
29  
30  
31  
32  
33  
34  
35  
36  
37  
38  
39  
40  
41  
42  
43  
44  
45  
46  
47  
48  
49  
50  
51  
52  
53  
54  
55  
56  
57  
58  
59  
60

### CRF [13] PHQ-9

The Patient Health Questionnaire – 9 is a validated measure which accesses presence and severity of depression symptoms as well as presence and degree of suicide risk. Due to copyright restrictions, this CRF is not included in this packet.

| [14] SPIROMETRY                                        |                                                                                                                                                                                                                                                                                                                          |
|--------------------------------------------------------|--------------------------------------------------------------------------------------------------------------------------------------------------------------------------------------------------------------------------------------------------------------------------------------------------------------------------|
| <b>leDEA/TB SRN ID</b>                                 |                                                                                                                                                                                                                                                                                                                          |
| Visit                                                  | <input type="checkbox"/> Month 2<br><input type="checkbox"/> End of Tx<br><input type="checkbox"/> 6-M Post-Tx                                                                                                                                                                                                           |
| Visit date (dd/mm/yyyy)                                | _ _ / _ _ / _ _ _ _                                                                                                                                                                                                                                                                                                      |
| 1. Is the patient able to perform/complete spirometry? | <input type="checkbox"/> Yes <input type="checkbox"/> No <input type="checkbox"/> Not done/not applicable                                                                                                                                                                                                                |
| 2. If no, why not?                                     | <input type="checkbox"/> Too Sick<br><input type="checkbox"/> Delirious/Demented/Confused<br><input type="checkbox"/> Has contraindication such as recent MI, surgery, PE, hemoptysis<br><input type="checkbox"/> Attempted, but unable to get good quality test<br><input type="checkbox"/> Other, please specify _____ |
| Pre bronchodilator measured values                     |                                                                                                                                                                                                                                                                                                                          |
| 3. FVC (Liters)                                        | _ . _ _ _                                                                                                                                                                                                                                                                                                                |
| 4. FEV1 (Liters)                                       | _ . _ _ _                                                                                                                                                                                                                                                                                                                |
| 5. FEF 25-75 (Liters)                                  | _ . _ _ _                                                                                                                                                                                                                                                                                                                |
| 6. Peak Flow (PEF) (Liters/second)                     | _ _ _                                                                                                                                                                                                                                                                                                                    |
| 7. Spirometry grade/quality                            | <input type="checkbox"/> A<br><input type="checkbox"/> B<br><input type="checkbox"/> C<br><input type="checkbox"/> D<br><input type="checkbox"/> F                                                                                                                                                                       |
| Post bronchodilator measured values                    |                                                                                                                                                                                                                                                                                                                          |
| 8. FVC value (Liters)                                  | _ . _ _ _                                                                                                                                                                                                                                                                                                                |
| 9. FEV1 value (Liters)                                 | _ . _ _ _                                                                                                                                                                                                                                                                                                                |
| 10. FEF 25-75 value (Liters)                           | _ . _ _ _                                                                                                                                                                                                                                                                                                                |
| 11. Peak Flow (PEF) (Liters/second)                    | _ _ _                                                                                                                                                                                                                                                                                                                    |
| 12. Spirometry grade/quality                           | <input type="checkbox"/> A<br><input type="checkbox"/> B<br><input type="checkbox"/> C<br><input type="checkbox"/> D<br><input type="checkbox"/> F                                                                                                                                                                       |
| Final Interpretation                                   |                                                                                                                                                                                                                                                                                                                          |
| 13. Interpretation done by                             | <input type="checkbox"/> Spirometry technician<br><input type="checkbox"/> Pneumologist<br><input type="checkbox"/> Spirometer itself<br><input type="checkbox"/> Other                                                                                                                                                  |

|    |                                          |                                                                                           |
|----|------------------------------------------|-------------------------------------------------------------------------------------------|
| 1  |                                          | <input type="checkbox"/> Unknown                                                          |
| 2  |                                          |                                                                                           |
| 3  |                                          |                                                                                           |
| 4  | 14. Obstructive pattern detected         | <input type="checkbox"/> Yes (FEV1/FVC < LLN) if yes fill below                           |
| 5  |                                          | <input type="checkbox"/> No                                                               |
| 6  |                                          | <input type="checkbox"/> Unknown                                                          |
| 7  |                                          |                                                                                           |
| 8  | 15. FEV1 (severity) % of predicted value | <input type="checkbox"/> 80%-100%                                                         |
| 9  |                                          | <input type="checkbox"/> 50-80%                                                           |
| 10 |                                          | <input type="checkbox"/> 30-50%                                                           |
| 11 |                                          | <input type="checkbox"/> <30%                                                             |
| 12 |                                          |                                                                                           |
| 13 |                                          |                                                                                           |
| 14 | 16. Bronchodilator Response              | <input type="checkbox"/> No change (FVC <12% & 200ml or FEV1 <12% & 200ml over baseline)  |
| 15 |                                          | <input type="checkbox"/> Improved (FVC 12% AND 200ml or FEV1 12% AND 200ml over baseline) |
| 16 |                                          | <input type="checkbox"/> Normalized (FEV1/FVC ratio after bronchodilator normalized)      |
| 17 |                                          | <input type="checkbox"/> Unknown                                                          |
| 18 |                                          |                                                                                           |
| 19 |                                          |                                                                                           |
| 20 |                                          |                                                                                           |
| 21 |                                          |                                                                                           |
| 22 |                                          |                                                                                           |
| 23 | 17. Restrictive pattern detected         | <input type="checkbox"/> Yes (FVC<LLN)                                                    |
| 24 |                                          | <input type="checkbox"/> No                                                               |
| 25 |                                          | <input type="checkbox"/> Unknown                                                          |
| 26 |                                          |                                                                                           |
| 27 |                                          |                                                                                           |
| 28 |                                          |                                                                                           |
| 29 |                                          |                                                                                           |
| 30 |                                          |                                                                                           |
| 31 |                                          |                                                                                           |
| 32 |                                          |                                                                                           |
| 33 |                                          |                                                                                           |
| 34 |                                          |                                                                                           |
| 35 |                                          |                                                                                           |
| 36 |                                          |                                                                                           |
| 37 |                                          |                                                                                           |
| 38 |                                          |                                                                                           |
| 39 |                                          |                                                                                           |
| 40 |                                          |                                                                                           |
| 41 |                                          |                                                                                           |
| 42 |                                          |                                                                                           |
| 43 |                                          |                                                                                           |
| 44 |                                          |                                                                                           |
| 45 |                                          |                                                                                           |
| 46 |                                          |                                                                                           |
| 47 |                                          |                                                                                           |
| 48 |                                          |                                                                                           |
| 49 |                                          |                                                                                           |
| 50 |                                          |                                                                                           |
| 51 |                                          |                                                                                           |
| 52 |                                          |                                                                                           |
| 53 |                                          |                                                                                           |
| 54 |                                          |                                                                                           |
| 55 |                                          |                                                                                           |
| 56 |                                          |                                                                                           |
| 57 |                                          |                                                                                           |
| 58 |                                          |                                                                                           |
| 59 |                                          |                                                                                           |
| 60 |                                          |                                                                                           |

Investigator: \_\_\_\_\_ Signature: \_\_\_\_\_ Date |\_|\_| / |\_|\_| / |\_|\_|\_|\_|

## [15] FUNCTIONAL ASSESSMENT 1 MINUTE SIT TO STAND TEST

|                                                                                                                                                                                                                                                                                                                                                   |                                                                                                                                                                                                                                                                                                                                                                                                                                                                                                                                      |
|---------------------------------------------------------------------------------------------------------------------------------------------------------------------------------------------------------------------------------------------------------------------------------------------------------------------------------------------------|--------------------------------------------------------------------------------------------------------------------------------------------------------------------------------------------------------------------------------------------------------------------------------------------------------------------------------------------------------------------------------------------------------------------------------------------------------------------------------------------------------------------------------------|
| leDEA/TB SRN ID                                                                                                                                                                                                                                                                                                                                   |                                                                                                                                                                                                                                                                                                                                                                                                                                                                                                                                      |
| Visit                                                                                                                                                                                                                                                                                                                                             | <input type="checkbox"/> Baseline<br><input type="checkbox"/> Month 2<br><input type="checkbox"/> End of Tx<br><input type="checkbox"/> 6-M Post-Tx<br><input type="checkbox"/> 12-M Post-Tx                                                                                                                                                                                                                                                                                                                                         |
| Visit date (dd/mm/yyyy)                                                                                                                                                                                                                                                                                                                           | _ _ / _ _ / _ _ _ _                                                                                                                                                                                                                                                                                                                                                                                                                                                                                                                  |
| 1. Patient able to complete the sit-to-stand test                                                                                                                                                                                                                                                                                                 | <input type="checkbox"/> Yes<br><input type="checkbox"/> No<br><input type="checkbox"/> Not done / not applicable                                                                                                                                                                                                                                                                                                                                                                                                                    |
| 2. Reasons why unable                                                                                                                                                                                                                                                                                                                             | <input type="checkbox"/> Too Sick<br><input type="checkbox"/> Delirious / Demented / Confused<br><input type="checkbox"/> Has lower extremity injury that prevents standing<br><input type="checkbox"/> Other                                                                                                                                                                                                                                                                                                                        |
| <b>At Rest</b>                                                                                                                                                                                                                                                                                                                                    |                                                                                                                                                                                                                                                                                                                                                                                                                                                                                                                                      |
| 3. SpO2 (%)                                                                                                                                                                                                                                                                                                                                       | _ _                                                                                                                                                                                                                                                                                                                                                                                                                                                                                                                                  |
| 4. Heart rate (beats per minute)                                                                                                                                                                                                                                                                                                                  | _ _ _                                                                                                                                                                                                                                                                                                                                                                                                                                                                                                                                |
| 5. Modified Borg Dyspnea Scale<br><i>"This is a scale that asks you to rate the difficulty of your breathing. It starts at number 0, where your breathing is causing you no difficulty at all, and progresses through to number 10, where your breathing difficulty is maximal. How much difficulty is your breathing causing you right now?"</i> | <input type="checkbox"/> 0 Nothing at all<br><input type="checkbox"/> 0.5 Very, very slight (just noticeable)<br><input type="checkbox"/> 1 Very slight<br><input type="checkbox"/> 2 Slight<br><input type="checkbox"/> 3 Moderate<br><input type="checkbox"/> 4 Somewhat severe<br><input type="checkbox"/> 5 Severe<br><input type="checkbox"/> 6<br><input type="checkbox"/> 7 Very severe<br><input type="checkbox"/> 8<br><input type="checkbox"/> 9 Very, very severe (almost maximal)<br><input type="checkbox"/> 10 Maximal |
| <b>Post sit-to-stand test</b>                                                                                                                                                                                                                                                                                                                     |                                                                                                                                                                                                                                                                                                                                                                                                                                                                                                                                      |
| 6. SpO2 (%)                                                                                                                                                                                                                                                                                                                                       | _ _                                                                                                                                                                                                                                                                                                                                                                                                                                                                                                                                  |
| 7. Heart rate (beats per minute)                                                                                                                                                                                                                                                                                                                  | _ _ _                                                                                                                                                                                                                                                                                                                                                                                                                                                                                                                                |
| 8. Modified Borg Dyspnea Scale<br><i>"This is a scale that asks you to rate the difficulty of your breathing. It starts at number 0, where your breathing is causing you no difficulty at all, and progresses through to number 10, where your breathing difficulty is maximal. How much difficulty is your breathing causing you right now?"</i> | <input type="checkbox"/> 0 Nothing at all<br><input type="checkbox"/> 0.5 Very, very slight (just noticeable)<br><input type="checkbox"/> 1 Very slight<br><input type="checkbox"/> 2 Slight<br><input type="checkbox"/> 3 Moderate<br><input type="checkbox"/> 4 Somewhat severe<br><input type="checkbox"/> 5 Severe<br><input type="checkbox"/> 6<br><input type="checkbox"/> 7 Very severe<br><input type="checkbox"/> 8<br><input type="checkbox"/> 9 Very, very severe (almost maximal)<br><input type="checkbox"/> 10 Maximal |
| 9. Number of sit-to-stands completed in 1 min                                                                                                                                                                                                                                                                                                     | _ _                                                                                                                                                                                                                                                                                                                                                                                                                                                                                                                                  |

Investigator: \_\_\_\_\_ Signature: \_\_\_\_\_ Date |\_|\_|/|\_|\_|/|\_|\_|\_|\_|

For peer review only - <http://bmjopen.bmj.com/site/about/guidelines.xhtml>

| [16] TB MICROBIOLOGY                                                                                                                                                                                                                      |                                                                                                                                                                                                                                                                              |
|-------------------------------------------------------------------------------------------------------------------------------------------------------------------------------------------------------------------------------------------|------------------------------------------------------------------------------------------------------------------------------------------------------------------------------------------------------------------------------------------------------------------------------|
| 1<br>2<br>3<br>4<br>5<br>6<br>7<br>8<br>9                                                                                                                                                                                                 | leDEA/TB SRN ID                                                                                                                                                                                                                                                              |
| 10<br>11<br>12                                                                                                                                                                                                                            | Visit<br><input type="checkbox"/> Baseline<br><input type="checkbox"/> Month 1<br><input type="checkbox"/> Month 2<br><input type="checkbox"/> End of Tx<br><input type="checkbox"/> TX F/R/W                                                                                |
| 13<br>14<br>15                                                                                                                                                                                                                            | Visit date (dd/mm/yyyy)  _ _ / _ _ / _ _ _ _                                                                                                                                                                                                                                 |
| <b>Instructions:</b> Enter all available test results which may have been performed or which may have resulted since the last study visit. If this is the baseline visit, enter all available results to date for this TB illness course. |                                                                                                                                                                                                                                                                              |
| <b>Smear microscopy</b>                                                                                                                                                                                                                   |                                                                                                                                                                                                                                                                              |
| 16<br>17<br>18<br>19<br>20<br>21<br>22<br>23                                                                                                                                                                                              | 1. Number of smears done (If none, enter '0')                                                                                                                                                                                                                                |
| 24<br>25                                                                                                                                                                                                                                  | <input type="checkbox"/> 0 (SKIP TO #5)<br><input type="checkbox"/> 1<br><input type="checkbox"/> 2<br><input type="checkbox"/> 3 or more<br><input type="checkbox"/> Unknown                                                                                                |
| 26<br>27<br>28<br>29                                                                                                                                                                                                                      | 2. Smear 1 date (dd/mm/yyyy)  _ _ / _ _ / _ _ _ _                                                                                                                                                                                                                            |
| 30<br>31<br>32<br>33<br>34<br>35<br>36<br>37                                                                                                                                                                                              | 2a. Smear 1 type of sample<br><input type="checkbox"/> Expectorated sputum<br><input type="checkbox"/> Other: _____<br><input type="checkbox"/> Unknown                                                                                                                      |
| 38<br>39<br>40<br>41<br>42<br>43<br>44<br>45<br>46<br>47<br>48<br>49<br>50<br>51<br>52                                                                                                                                                    | 2b. Smear 1 result<br><input type="checkbox"/> Negative<br><input type="checkbox"/> Scanty<br><input type="checkbox"/> 1+<br><input type="checkbox"/> 2+ (++)<br><input type="checkbox"/> 3+ (+++)<br><input type="checkbox"/> 4+ (++++)<br><input type="checkbox"/> Unknown |
| 53<br>54                                                                                                                                                                                                                                  | 3. Smear 2 date (dd/mm/yyyy)  _ _ / _ _ / _ _ _ _                                                                                                                                                                                                                            |
| 55<br>56<br>57<br>58                                                                                                                                                                                                                      | 3a. Smear 2 type of sample<br><input type="checkbox"/> Expectorated sputum<br><input type="checkbox"/> Other: _____<br><input type="checkbox"/> Unknown                                                                                                                      |
| 59<br>60                                                                                                                                                                                                                                  | 3b. Smear 2 result<br><input type="checkbox"/> Negative<br><input type="checkbox"/> Scanty<br><input type="checkbox"/> 1+<br><input type="checkbox"/> 2+ (++)<br><input type="checkbox"/> 3+ (+++)<br><input type="checkbox"/> 4+ (++++)<br><input type="checkbox"/> Unknown |
|                                                                                                                                                                                                                                           | 4. Smear 3 date (dd/mm/yyyy)  _ _ / _ _ / _ _ _ _                                                                                                                                                                                                                            |
|                                                                                                                                                                                                                                           | 4a. Smear 3 type of sample<br><input type="checkbox"/> Expectorated sputum<br><input type="checkbox"/> Other: _____<br><input type="checkbox"/> Unknown                                                                                                                      |
|                                                                                                                                                                                                                                           | 4b. Smear 3 result<br><input type="checkbox"/> Negative<br><input type="checkbox"/> Scanty<br><input type="checkbox"/> 1+<br><input type="checkbox"/> 2+ (++)                                                                                                                |

|    |                                      |                                              |
|----|--------------------------------------|----------------------------------------------|
| 1  |                                      | <input type="checkbox"/> 3+ (+++)            |
| 2  |                                      | <input type="checkbox"/> 4+ (++++)           |
| 3  |                                      | <input type="checkbox"/> Unknown             |
| 4  | <b>Xpert MTB/RIF or Ultra</b>        |                                              |
| 5  |                                      |                                              |
| 6  | 5. Number of Xpert tests done        | <input type="checkbox"/> 0 (SKIP TO #10)     |
| 7  | (If none, enter '0')                 | <input type="checkbox"/> 1                   |
| 8  |                                      | <input type="checkbox"/> 2                   |
| 9  |                                      | <input type="checkbox"/> 3 or more           |
| 10 |                                      | <input type="checkbox"/> Unknown             |
| 11 |                                      |                                              |
| 12 | 6. Xpert TB type of test             | <input type="checkbox"/> Xpert MTB/RIF       |
| 13 |                                      | <input type="checkbox"/> Xpert MTB/RIF Ultra |
| 14 |                                      | <input type="checkbox"/> Other               |
| 15 |                                      | <input type="checkbox"/> Unknown             |
| 16 |                                      |                                              |
| 17 | 7. Xpert TB test 1 date (dd/mm/yyyy) | _ _ / _ _ / _ _ _ _                          |
| 18 |                                      |                                              |
| 19 | 7a. Xpert TB test 1 type of sample   | <input type="checkbox"/> Expecterated sputum |
| 20 |                                      | <input type="checkbox"/> Other: _____        |
| 21 |                                      | <input type="checkbox"/> Unknown             |
| 22 |                                      |                                              |
| 23 | 7b. Xpert TB test 1 MTB result       | <input type="checkbox"/> Detected (MTB+)     |
| 24 |                                      | <input type="checkbox"/> Not detected (MTB-) |
| 25 |                                      | <input type="checkbox"/> Indeterminate/error |
| 26 |                                      | <input type="checkbox"/> Unknown             |
| 27 |                                      |                                              |
| 28 | 7c. Xpert TB test 1 result category  | <input type="checkbox"/> Trace               |
| 29 |                                      | <input type="checkbox"/> Very low            |
| 30 |                                      | <input type="checkbox"/> Low                 |
| 31 |                                      | <input type="checkbox"/> Medium              |
| 32 |                                      | <input type="checkbox"/> High                |
| 33 |                                      |                                              |
| 34 | 7d. Xpert TB test 1 RIF resistance   | <input type="checkbox"/> Detected            |
| 35 |                                      | <input type="checkbox"/> Not detected        |
| 36 |                                      | <input type="checkbox"/> Indeterminate       |
| 37 |                                      | <input type="checkbox"/> Unknown             |
| 38 |                                      |                                              |
| 39 | 8. Xpert TB test 2 date (dd/mm/yyyy) | _ _ / _ _ / _ _ _ _                          |
| 40 |                                      |                                              |
| 41 | 8a. Xpert TB test 2 type of sample   | <input type="checkbox"/> Expecterated sputum |
| 42 |                                      | <input type="checkbox"/> Other: _____        |
| 43 |                                      | <input type="checkbox"/> Unknown             |
| 44 |                                      |                                              |
| 45 | 8b. Xpert TB test 2 MTB result       | <input type="checkbox"/> Detected (MTB+)     |
| 46 |                                      | <input type="checkbox"/> Not detected (MTB-) |
| 47 |                                      | <input type="checkbox"/> Indeterminate/error |
| 48 |                                      | <input type="checkbox"/> Unknown             |
| 49 |                                      |                                              |
| 50 | 8c. Xpert TB test 2 result category  | <input type="checkbox"/> Trace               |
| 51 |                                      | <input type="checkbox"/> Very low            |
| 52 |                                      | <input type="checkbox"/> Low                 |
| 53 |                                      | <input type="checkbox"/> Medium              |
| 54 |                                      | <input type="checkbox"/> High                |
| 55 |                                      |                                              |
| 56 | 8d. Xpert TB test 2 RIF resistance   | <input type="checkbox"/> Detected            |
| 57 |                                      | <input type="checkbox"/> Not detected        |
| 58 |                                      | <input type="checkbox"/> Indeterminate       |
| 59 |                                      | <input type="checkbox"/> Unknown             |
| 60 |                                      |                                              |
|    | 9. Xpert TB test 3 date (dd/mm/yyyy) | _ _ / _ _ / _ _ _ _                          |



|                                                    |                                                          |                                                                                                                                                                                                                                                                                                                     |
|----------------------------------------------------|----------------------------------------------------------|---------------------------------------------------------------------------------------------------------------------------------------------------------------------------------------------------------------------------------------------------------------------------------------------------------------------|
| 1<br>2<br>3<br>4                                   | 9a. Xpert TB test 3 type of sample                       | <input type="checkbox"/> Expectorated sputum<br><input type="checkbox"/> Other: _____<br><input type="checkbox"/> Unknown                                                                                                                                                                                           |
| 5<br>6<br>7<br>8                                   | 9b. Xpert TB test 3 MTB result                           | <input type="checkbox"/> Detected (MTB+)<br><input type="checkbox"/> Not detected (MTB-)<br><input type="checkbox"/> Indeterminate/error<br><input type="checkbox"/> Unknown                                                                                                                                        |
| 9<br>10<br>11<br>12<br>13<br>14                    | 9c. Xpert TB test 3 result category                      | <input type="checkbox"/> Trace<br><input type="checkbox"/> Very low<br><input type="checkbox"/> Low<br><input type="checkbox"/> Medium<br><input type="checkbox"/> High                                                                                                                                             |
| 15<br>16<br>17<br>18<br>19                         | 9d. Xpert TB test 3 RIF resistance                       | <input type="checkbox"/> Detected<br><input type="checkbox"/> Not detected<br><input type="checkbox"/> Indeterminate<br><input type="checkbox"/> Unknown                                                                                                                                                            |
| 20                                                 | <b>TB Culture</b>                                        |                                                                                                                                                                                                                                                                                                                     |
| 21<br>22<br>23<br>24<br>25<br>26<br>27             | 10. Number of cultures done<br>(If none, enter '0')      | <input type="checkbox"/> 0 (SKIP TO #15)<br><input type="checkbox"/> 1<br><input type="checkbox"/> 2<br><input type="checkbox"/> 3 or more<br><input type="checkbox"/> Unknown                                                                                                                                      |
| 28<br>29<br>30<br>31<br>32                         | 11. Type of TB culture                                   | <input type="checkbox"/> Lowenstein Jensen (LJ)<br><input type="checkbox"/> MGIT<br><input type="checkbox"/> LJ and MGIT<br><input type="checkbox"/> Unknown                                                                                                                                                        |
| 33<br>34                                           | 12. TB Culture 1 start date<br>(dd/mm/yyyy)              | _ _ / _ _ / _ _ _ _                                                                                                                                                                                                                                                                                                 |
| 35<br>36<br>37<br>38                               | 12a. TB Culture 1 type of sample                         | <input type="checkbox"/> Expectorated sputum<br><input type="checkbox"/> Other: _____<br><input type="checkbox"/> Unknown                                                                                                                                                                                           |
| 39<br>40                                           | 12b. TB Culture 1 result date<br>(positivity or sterile) | _ _ / _ _ / _ _ _ _                                                                                                                                                                                                                                                                                                 |
| 41<br>42<br>43<br>44<br>45<br>46<br>47<br>48<br>49 | 12c. TB Culture 1 result                                 | <input type="checkbox"/> Pending (mark form as <b>Incomplete</b> and update result if/when available)<br><input type="checkbox"/> Positive MTB<br><input type="checkbox"/> Positive NTM<br><input type="checkbox"/> Contaminated<br><input type="checkbox"/> Negative (sterile)<br><input type="checkbox"/> Unknown |
| 50<br>51                                           | 13. TB Culture 2 start date<br>(dd/mm/yyyy)              | _ _ / _ _ / _ _ _ _                                                                                                                                                                                                                                                                                                 |
| 52<br>53<br>54<br>55                               | 13a. TB Culture 2 type of sample                         | <input type="checkbox"/> Expectorated sputum<br><input type="checkbox"/> Other: _____<br><input type="checkbox"/> Unknown                                                                                                                                                                                           |
| 56<br>57                                           | 13b. TB Culture 2 result date<br>(positivity or sterile) | _ _ / _ _ / _ _ _ _                                                                                                                                                                                                                                                                                                 |
| 58<br>59<br>60                                     | 13c. TB Culture 2 result                                 | <input type="checkbox"/> Pending (mark form as <b>Incomplete</b> and update result if/when available)<br><input type="checkbox"/> Positive MTB<br><input type="checkbox"/> Positive NTM                                                                                                                             |

|    |                                                                     |                                                                                                       |                            |                            |                              |
|----|---------------------------------------------------------------------|-------------------------------------------------------------------------------------------------------|----------------------------|----------------------------|------------------------------|
| 1  |                                                                     | <input type="checkbox"/> Contaminated                                                                 |                            |                            |                              |
| 2  |                                                                     | <input type="checkbox"/> Negative (sterile)                                                           |                            |                            |                              |
| 3  |                                                                     | <input type="checkbox"/> Unknown                                                                      |                            |                            |                              |
| 4  | 14. TB Culture 3 start date                                         | _ _ / _ _ / _ _ _ _                                                                                   |                            |                            |                              |
| 5  | (dd/mm/yyyy)                                                        |                                                                                                       |                            |                            |                              |
| 6  | 14a. TB Culture 3 type of sample                                    | <input type="checkbox"/> Expecterated sputum                                                          |                            |                            |                              |
| 7  |                                                                     | <input type="checkbox"/> Other: _____                                                                 |                            |                            |                              |
| 8  |                                                                     | <input type="checkbox"/> Unknown                                                                      |                            |                            |                              |
| 9  |                                                                     |                                                                                                       |                            |                            |                              |
| 10 | 14b. TB Culture 3 result date                                       | _ _ / _ _ / _ _ _ _                                                                                   |                            |                            |                              |
| 11 | (positivity or sterile)                                             |                                                                                                       |                            |                            |                              |
| 12 | 14c. TB Culture 3 result                                            | <input type="checkbox"/> Pending (mark form as <b>Incomplete</b> and update result if/when available) |                            |                            |                              |
| 13 |                                                                     | <input type="checkbox"/> Positive MTB                                                                 |                            |                            |                              |
| 14 |                                                                     | <input type="checkbox"/> Positive NTM                                                                 |                            |                            |                              |
| 15 |                                                                     | <input type="checkbox"/> Contaminated                                                                 |                            |                            |                              |
| 16 |                                                                     | <input type="checkbox"/> Negative (sterile)                                                           |                            |                            |                              |
| 17 |                                                                     | <input type="checkbox"/> Unknown                                                                      |                            |                            |                              |
| 18 |                                                                     |                                                                                                       |                            |                            |                              |
| 19 |                                                                     |                                                                                                       |                            |                            |                              |
| 20 |                                                                     |                                                                                                       |                            |                            |                              |
| 21 | <b>Drug susceptibility testing</b>                                  |                                                                                                       |                            |                            |                              |
| 22 | 15. 1 <sup>st</sup> line TB drug-susceptibility testing done        | <input type="checkbox"/> Yes (fill below)                                                             |                            |                            |                              |
| 23 |                                                                     | <input type="checkbox"/> No (SKIP TO #20)                                                             |                            |                            |                              |
| 24 |                                                                     | <input type="checkbox"/> Unknown                                                                      |                            |                            |                              |
| 25 | 16. Type(s) of 1 <sup>st</sup> line TB-drug susceptibility testing  | <input type="checkbox"/> Culture-based DST                                                            |                            |                            |                              |
| 26 | (Check all that apply)                                              | <input type="checkbox"/> Genotypic DST (MTBDRplus / LPA-1)                                            |                            |                            |                              |
| 27 |                                                                     | <input type="checkbox"/> Xpert Ultra                                                                  |                            |                            |                              |
| 28 |                                                                     | <input type="checkbox"/> Other: _____                                                                 |                            |                            |                              |
| 29 |                                                                     | <input type="checkbox"/> Unknown                                                                      |                            |                            |                              |
| 30 |                                                                     |                                                                                                       |                            |                            |                              |
| 31 |                                                                     |                                                                                                       |                            |                            |                              |
| 32 | 17. Date of sample, 1 <sup>st</sup> line DST                        | _ _ / _ _ / _ _ _ _                                                                                   |                            |                            |                              |
| 33 |                                                                     |                                                                                                       |                            |                            |                              |
| 34 | 17a. Type of sample, 1 <sup>st</sup> line DST                       | <input type="checkbox"/> Expecterated sputum                                                          |                            |                            |                              |
| 35 |                                                                     | <input type="checkbox"/> Other: _____                                                                 |                            |                            |                              |
| 36 |                                                                     | <input type="checkbox"/> Unknown                                                                      |                            |                            |                              |
| 37 |                                                                     |                                                                                                       |                            |                            |                              |
| 38 | 17b. For each first-line drug, indicate results of DST.             | Isoniazid (INH)                                                                                       | <input type="checkbox"/> S | <input type="checkbox"/> R | <input type="checkbox"/> Unk |
| 39 |                                                                     | Rifampin (RIF)                                                                                        | <input type="checkbox"/> S | <input type="checkbox"/> R | <input type="checkbox"/> Unk |
| 40 |                                                                     | Pyrazinamide (PZA)                                                                                    | <input type="checkbox"/> S | <input type="checkbox"/> R | <input type="checkbox"/> Unk |
| 41 |                                                                     | Ethambutol (EMB)                                                                                      | <input type="checkbox"/> S | <input type="checkbox"/> R | <input type="checkbox"/> Unk |
| 42 |                                                                     | Streptomycin (SM)                                                                                     | <input type="checkbox"/> S | <input type="checkbox"/> R | <input type="checkbox"/> Unk |
| 43 |                                                                     |                                                                                                       |                            |                            |                              |
| 44 | 18. 2 <sup>nd</sup> line TB drug-susceptibility testing done        | <input type="checkbox"/> Yes (if yes fill below)                                                      |                            |                            |                              |
| 45 |                                                                     | <input type="checkbox"/> No                                                                           |                            |                            |                              |
| 46 |                                                                     | <input type="checkbox"/> Unknown                                                                      |                            |                            |                              |
| 47 |                                                                     |                                                                                                       |                            |                            |                              |
| 48 | 18a. Type(s) of 2 <sup>nd</sup> line TB-drug susceptibility testing | <input type="checkbox"/> Culture-based DST                                                            |                            |                            |                              |
| 49 | (Check all that apply)                                              | <input type="checkbox"/> Genotypic DST (MTBDRsl / LPA-2)                                              |                            |                            |                              |
| 50 |                                                                     | <input type="checkbox"/> Xpert MTB-XDR                                                                |                            |                            |                              |
| 51 |                                                                     | <input type="checkbox"/> Other: _____                                                                 |                            |                            |                              |
| 52 |                                                                     | <input type="checkbox"/> Unknown                                                                      |                            |                            |                              |
| 53 |                                                                     |                                                                                                       |                            |                            |                              |
| 54 | 18b. For each second-line drug, indicate results of DST.            | Bedaquiline                                                                                           | <input type="checkbox"/> S | <input type="checkbox"/> R | <input type="checkbox"/> Unk |
| 55 |                                                                     | Moxifloxacin                                                                                          | <input type="checkbox"/> S | <input type="checkbox"/> R | <input type="checkbox"/> Unk |
| 56 |                                                                     | Levofloxacin                                                                                          | <input type="checkbox"/> S | <input type="checkbox"/> R | <input type="checkbox"/> Unk |
| 57 |                                                                     | Ciprofloxacin                                                                                         | <input type="checkbox"/> S | <input type="checkbox"/> R | <input type="checkbox"/> Unk |
| 58 |                                                                     | Linezolid                                                                                             | <input type="checkbox"/> S | <input type="checkbox"/> R | <input type="checkbox"/> Unk |
| 59 |                                                                     | Clofazimine                                                                                           | <input type="checkbox"/> S | <input type="checkbox"/> R | <input type="checkbox"/> Unk |
| 60 |                                                                     | Cycloserine                                                                                           | <input type="checkbox"/> S | <input type="checkbox"/> R | <input type="checkbox"/> Unk |

|    |                                               |                                       |                            |                            |                              |
|----|-----------------------------------------------|---------------------------------------|----------------------------|----------------------------|------------------------------|
| 1  |                                               | Amikacin                              | <input type="checkbox"/> S | <input type="checkbox"/> R | <input type="checkbox"/> Unk |
| 2  |                                               | Carbapenems                           | <input type="checkbox"/> S | <input type="checkbox"/> R | <input type="checkbox"/> Unk |
| 3  |                                               | Delaminid                             | <input type="checkbox"/> S | <input type="checkbox"/> R | <input type="checkbox"/> Unk |
| 4  |                                               | Ethionamide                           | <input type="checkbox"/> S | <input type="checkbox"/> R | <input type="checkbox"/> Unk |
| 5  |                                               | Prothionamide                         | <input type="checkbox"/> S | <input type="checkbox"/> R | <input type="checkbox"/> Unk |
| 6  |                                               | Kanamycin                             | <input type="checkbox"/> S | <input type="checkbox"/> R | <input type="checkbox"/> Unk |
| 7  |                                               | P-aminosalicylic acid                 | <input type="checkbox"/> S | <input type="checkbox"/> R | <input type="checkbox"/> Unk |
| 8  |                                               | Capreomycin                           | <input type="checkbox"/> S | <input type="checkbox"/> R | <input type="checkbox"/> Unk |
| 9  |                                               | Azithromycin                          | <input type="checkbox"/> S | <input type="checkbox"/> R | <input type="checkbox"/> Unk |
| 10 |                                               | Clarithromycin                        | <input type="checkbox"/> S | <input type="checkbox"/> R | <input type="checkbox"/> Unk |
| 11 |                                               | Amoxicillin-clavulanate               | <input type="checkbox"/> S | <input type="checkbox"/> R | <input type="checkbox"/> Unk |
| 12 |                                               | Other<br>(specify)_____               | <input type="checkbox"/> S | <input type="checkbox"/> R | <input type="checkbox"/> Unk |
| 13 |                                               | Other<br>(specify)_____               | <input type="checkbox"/> S | <input type="checkbox"/> R | <input type="checkbox"/> Unk |
| 14 |                                               | <b>Urine LAM test</b>                 |                            |                            |                              |
| 15 | 20. Urine LAM test done                       | <input type="checkbox"/> Yes          |                            |                            |                              |
| 16 |                                               | <input type="checkbox"/> No           |                            |                            |                              |
| 17 |                                               | <input type="checkbox"/> Unknown      |                            |                            |                              |
| 18 | 20a. Type of urine LAM test done              | <input type="checkbox"/> Alere LAM    |                            |                            |                              |
| 19 |                                               | <input type="checkbox"/> Fujifilm LAM |                            |                            |                              |
| 20 |                                               | <input type="checkbox"/> Unknown      |                            |                            |                              |
| 21 | 20b. Date urine LAM test done<br>(dd/mm/yyyy) | _ _ / _ _ / _ _ _ _                   |                            |                            |                              |
| 22 | 20c. Results of urine LAM test                | <input type="checkbox"/> Positive     |                            |                            |                              |
| 23 |                                               | <input type="checkbox"/> Negative     |                            |                            |                              |
| 24 |                                               | <input type="checkbox"/> Unknown      |                            |                            |                              |

Investigator: \_\_\_\_\_ Signature: \_\_\_\_\_ Date |\_|\_|/|\_|\_|/|\_|\_|\_|\_|

| [17] OTHER LABORATORY RESULTS                                                                                                                                                                                                                                                                                        |                                                                                                                                                                                                                                                                       |
|----------------------------------------------------------------------------------------------------------------------------------------------------------------------------------------------------------------------------------------------------------------------------------------------------------------------|-----------------------------------------------------------------------------------------------------------------------------------------------------------------------------------------------------------------------------------------------------------------------|
| <b>IeDEA/TB SRN ID</b>                                                                                                                                                                                                                                                                                               |                                                                                                                                                                                                                                                                       |
| Visit                                                                                                                                                                                                                                                                                                                | <input type="checkbox"/> Baseline<br><input type="checkbox"/> Month 1<br><input type="checkbox"/> Month 2<br><input type="checkbox"/> End of Tx<br><input type="checkbox"/> 6-M Post-Tx<br><input type="checkbox"/> 12-M Post-Tx<br><input type="checkbox"/> Tx F/R/W |
| Visit date (dd/mm/yyyy)                                                                                                                                                                                                                                                                                              | _ _ / _ _ / _ _ _ _                                                                                                                                                                                                                                                   |
| <b>Instructions:</b> Enter results for any new lab results since last study visit. If multiple tests were done for a given item, use the most recent. Exception: If a positive HIV diagnostic test, positive COVID diagnostic test, or unsuppressed HIV viral load, <u>enter the first positive/abnormal result.</u> |                                                                                                                                                                                                                                                                       |
| <b>HIV related tests</b>                                                                                                                                                                                                                                                                                             |                                                                                                                                                                                                                                                                       |
| 1. HIV test done                                                                                                                                                                                                                                                                                                     | <input type="checkbox"/> Yes<br><input type="checkbox"/> No<br><input type="checkbox"/> Unknown                                                                                                                                                                       |
| 2. HIV test date (dd/mm/yyyy)                                                                                                                                                                                                                                                                                        | _ _ / _ _ / _ _ _ _                                                                                                                                                                                                                                                   |
| 3. HIV test result                                                                                                                                                                                                                                                                                                   | <input type="checkbox"/> Positive<br><input type="checkbox"/> Negative<br><input type="checkbox"/> Unknown                                                                                                                                                            |
| 4. CD4 T-cell count                                                                                                                                                                                                                                                                                                  | <input type="checkbox"/>  _ _ _ _ _  /mm <sup>3</sup><br><input type="checkbox"/>  _ _  .  _ _  %<br><input type="checkbox"/> Not done<br><input type="checkbox"/> Not applicable<br>Date (dd/mm/yyyy):  _ _ / _ _ / _ _ _ _                                          |
| 5. HIV viral load                                                                                                                                                                                                                                                                                                    | <input type="checkbox"/>  _ _ _ _ _ _ _ _ _  cp/ml<br><input type="checkbox"/> Undetectable<br><input type="checkbox"/> Not done<br><input type="checkbox"/> Not applicable<br>Date (dd/mm/yyyy):  _ _ / _ _ / _ _ _ _                                                |
| <b>COVID-19 tests</b>                                                                                                                                                                                                                                                                                                |                                                                                                                                                                                                                                                                       |
| 6. COVID test                                                                                                                                                                                                                                                                                                        | <input type="checkbox"/> Done<br><input type="checkbox"/> Not done                                                                                                                                                                                                    |
| <b>If a COVID test was done, specify details below. If there was a positive test, record the results for the positive test.</b> (If multiple positive tests, record the details for the first positive test.)                                                                                                        |                                                                                                                                                                                                                                                                       |
| 7. COVID test date                                                                                                                                                                                                                                                                                                   | Date (dd/mm/yyyy):  _ _ / _ _ / _ _ _ _                                                                                                                                                                                                                               |

|                            |                                      |                                                                                                                                                                                        |
|----------------------------|--------------------------------------|----------------------------------------------------------------------------------------------------------------------------------------------------------------------------------------|
| 1<br>2<br>3<br>4<br>5      | <b>8. COVID-19 test type</b>         | <input type="checkbox"/> Molecular test / PCR<br><input type="checkbox"/> Antigen test (e.g., rapid test)<br><input type="checkbox"/> Unknown                                          |
| 6<br>7<br>8<br>9<br>10     | <b>9. COVID-19 test result</b>       | <input type="checkbox"/> Positive<br><input type="checkbox"/> Negative<br><input type="checkbox"/> Indeterminate                                                                       |
| 11<br>12                   | <b>Complete blood count (CBC)</b>    |                                                                                                                                                                                        |
| 13<br>14<br>15<br>16<br>17 | <b>10. CBC</b>                       | <input type="checkbox"/> Done<br><input type="checkbox"/> Not done<br><input type="checkbox"/> Not applicable                                                                          |
| 18<br>19                   | <b>11. CBC Date</b>                  | Date (dd/mm/yyyy):  _ _ / _ _ / _ _ _ _                                                                                                                                                |
| 20<br>21<br>22             | 11a. Hemoglobin                      | _ _ _  .  _ _  <input type="checkbox"/> g/dl <input type="checkbox"/> g/L                                                                                                              |
| 23<br>24                   | 11b. White blood cells               | _ _ _ _ _ _ _  .  _ _  <input type="checkbox"/> /mm <sup>3</sup> <input type="checkbox"/> x10 <sup>3</sup> /μL <input type="checkbox"/> giga (10 <sup>9</sup> )/L                      |
| 25<br>26                   | 11c. Monocytes (absolute)            | _ _ _ _ _ _ _  .  _ _  <input type="checkbox"/> /mm <sup>3</sup> <input type="checkbox"/> x10 <sup>3</sup> /μL <input type="checkbox"/> giga (10 <sup>9</sup> )/L                      |
| 27<br>28                   | 11d. Neutrophils (absolute)          | _ _ _ _ _ _ _  .  _ _  <input type="checkbox"/> /mm <sup>3</sup> <input type="checkbox"/> x10 <sup>3</sup> /μL <input type="checkbox"/> giga (10 <sup>9</sup> )/L                      |
| 29<br>30                   | 11e. Eosinophils (absolute)          | _ _ _ _ _ _ _  .  _ _  <input type="checkbox"/> /mm <sup>3</sup> <input type="checkbox"/> x10 <sup>3</sup> /μL <input type="checkbox"/> giga (10 <sup>9</sup> )/L                      |
| 31<br>32                   | 11f. Lymphocytes (absolute)          | _ _ _ _ _ _ _  .  _ _  <input type="checkbox"/> /mm <sup>3</sup> <input type="checkbox"/> x10 <sup>3</sup> /μL <input type="checkbox"/> giga (10 <sup>9</sup> )/L                      |
| 33<br>34<br>35             | 11g. Platelets                       | _ _ _ _ _ _ _  .  _ _  <input type="checkbox"/> x10 <sup>3</sup> /mm <sup>3</sup> <input type="checkbox"/> /μL                                                                         |
| 36<br>37                   | <b>Biochemistry</b>                  |                                                                                                                                                                                        |
| 38<br>39<br>40<br>41       | 12. Hemoglobin A1c (HbA1c)           | _ _  .  _ _  % <input type="checkbox"/> Not done<br>Date (dd/mm/yyyy):  _ _ / _ _ / _ _ _ _                                                                                            |
| 42<br>43<br>44<br>45       | 13. Random blood glucose             | _ _ _  .  _ _  <input type="checkbox"/> mmol/L <input type="checkbox"/> mg/L <input type="checkbox"/> g/L <input type="checkbox"/> Not done<br>Date (dd/mm/yyyy):  _ _ / _ _ / _ _ _ _ |
| 46<br>47<br>48<br>49       | 14. C-reactive protein (CRP)         | _ _ _  mg/L <input type="checkbox"/> Not done<br>Date (dd/mm/yyyy):  _ _ / _ _ / _ _ _ _                                                                                               |
| 50<br>51<br>52<br>53       | 15. Procalcitonin                    | _ _ _  .  _ _  μg/L <input type="checkbox"/> Not done<br>Date (dd/mm/yyyy):  _ _ / _ _ / _ _ _ _                                                                                       |
| 54<br>55                   | <b>Biochemistry: Metabolic Panel</b> |                                                                                                                                                                                        |
| 56<br>57<br>58<br>59       | <b>16. Metabolic Panel</b>           | <input type="checkbox"/> Done<br><input type="checkbox"/> Not done<br><input type="checkbox"/> Not applicable                                                                          |
| 60                         | <b>17. Metabolic Panel Date</b>      | Date (dd/mm/yyyy):  _ _ / _ _ / _ _ _ _                                                                                                                                                |

|                            |                           |                                                                                                                   |
|----------------------------|---------------------------|-------------------------------------------------------------------------------------------------------------------|
| 1<br>2<br>3<br>4<br>5<br>6 | 17a. ALT (SGPT)           | <input type="text"/> <input type="checkbox"/> mg/L <input type="checkbox"/> mg/dL <input type="checkbox"/> UI/L   |
| 7<br>8<br>9                | 17b. AST (SGOT)           | <input type="text"/> <input type="checkbox"/> mg/L <input type="checkbox"/> mg/dL <input type="checkbox"/> UI/L   |
| 10<br>11<br>12<br>13<br>14 | 17c. Creatinine           | <input type="text"/> <input type="checkbox"/> μmol/L <input type="checkbox"/> mg/L <input type="checkbox"/> mg/dL |
| 15<br>16<br>17             | 17d. Alkaline phosphatase | <input type="text"/> UI/L                                                                                         |
| 18<br>19<br>20<br>21       | 17e. Total bilirubin      | <input type="text"/> mg/L                                                                                         |
| 22<br>23<br>24<br>25       | 17f. Conjugated bilirubin | <input type="text"/> mg/L                                                                                         |
| 26<br>27<br>28             | 17g. Sodium               | <input type="text"/> mmol/L                                                                                       |
| 29<br>30<br>31<br>32       | 17h. Potassium            | <input type="text"/> <input type="text"/> mmol/L                                                                  |

For peer review only

Investigator: \_\_\_\_\_ Signature: \_\_\_\_\_ Date |\_\_|/|\_\_|/|\_\_|

| [18] CHEST X-RAY RESULTS                                  |                                                                                                                                                                                                                                                                                                                                                                                                                                                                                                                                                                 |
|-----------------------------------------------------------|-----------------------------------------------------------------------------------------------------------------------------------------------------------------------------------------------------------------------------------------------------------------------------------------------------------------------------------------------------------------------------------------------------------------------------------------------------------------------------------------------------------------------------------------------------------------|
| IeDEA/TB SRN ID                                           |                                                                                                                                                                                                                                                                                                                                                                                                                                                                                                                                                                 |
| Visit                                                     | <input type="checkbox"/> Baseline<br><input type="checkbox"/> Month 1<br><input type="checkbox"/> Month 2<br><input type="checkbox"/> End of Tx<br><input type="checkbox"/> 6-M Post-Tx<br><input type="checkbox"/> 12-M Post-Tx<br><input type="checkbox"/> Tx F/R/W                                                                                                                                                                                                                                                                                           |
| Visit date (dd/mm/yyyy)                                   | _ _ / _ _ / _ _ _ _                                                                                                                                                                                                                                                                                                                                                                                                                                                                                                                                             |
| 1. Was an x-ray performed (at any time since last visit)? | <input type="checkbox"/> Yes<br><input type="checkbox"/> No (End of form)                                                                                                                                                                                                                                                                                                                                                                                                                                                                                       |
| 2. Date of chest x-ray                                    | _ _ / _ _ / _ _ _ _                                                                                                                                                                                                                                                                                                                                                                                                                                                                                                                                             |
| 3. Interpreter                                            | <input type="checkbox"/> Clinician<br><input type="checkbox"/> Research assistant<br><input type="checkbox"/> Radiologist<br><input type="checkbox"/> Other                                                                                                                                                                                                                                                                                                                                                                                                     |
| 4. Quality of chest X-ray                                 | Patient identification: <input type="checkbox"/> Appropriate <input type="checkbox"/> Not acceptable<br>Rotation: <input type="checkbox"/> Absence or minimal <input type="checkbox"/> Not acceptable<br>Penetration: <input type="checkbox"/> Good (vertebra visible behind heart) <input type="checkbox"/> Not acceptable<br>Inspiration: <input type="checkbox"/> Good (8 <sup>th</sup> or 9 <sup>th</sup> posterior rib visible) <input type="checkbox"/> Not acceptable<br>Defective lung fields: <input type="checkbox"/> No <input type="checkbox"/> Yes |
| 4a. Result:                                               | <input type="checkbox"/> Normal (in both lungs)<br><input type="checkbox"/> Abnormal                                                                                                                                                                                                                                                                                                                                                                                                                                                                            |
| 5. Cavitation                                             | <input type="checkbox"/> Yes (present)<br><input type="checkbox"/> No (absent)<br><input type="checkbox"/> Not possible to determine based on test                                                                                                                                                                                                                                                                                                                                                                                                              |
| 5a. If yes,                                               | <input type="checkbox"/> Unilateral<br><input type="checkbox"/> Bilateral                                                                                                                                                                                                                                                                                                                                                                                                                                                                                       |
| 6. Miliary Lesions                                        | <input type="checkbox"/> Yes<br><input type="checkbox"/> No<br><input type="checkbox"/> Not possible to determine based on test                                                                                                                                                                                                                                                                                                                                                                                                                                 |
| 7. Alveolar opacity(ies) (infiltrate)                     | <input type="checkbox"/> Yes<br><input type="checkbox"/> No<br><input type="checkbox"/> Not possible to determine based on test                                                                                                                                                                                                                                                                                                                                                                                                                                 |
| 7a. If yes,                                               | <input type="checkbox"/> Unilateral<br><input type="checkbox"/> Bilateral                                                                                                                                                                                                                                                                                                                                                                                                                                                                                       |
| 8. Interstitial opacities                                 | <input type="checkbox"/> Yes<br><input type="checkbox"/> No<br><input type="checkbox"/> Not possible to determine based on test                                                                                                                                                                                                                                                                                                                                                                                                                                 |
| 8a. If yes,                                               | <input type="checkbox"/> Unilateral<br><input type="checkbox"/> Bilateral                                                                                                                                                                                                                                                                                                                                                                                                                                                                                       |
| 9. Pleural effusion                                       | <input type="checkbox"/> Yes<br><input type="checkbox"/> No                                                                                                                                                                                                                                                                                                                                                                                                                                                                                                     |

|                                                                                                   |                                                                                                                                                                                                                                                                                |
|---------------------------------------------------------------------------------------------------|--------------------------------------------------------------------------------------------------------------------------------------------------------------------------------------------------------------------------------------------------------------------------------|
|                                                                                                   | <input type="checkbox"/> Not possible to determine based on test                                                                                                                                                                                                               |
| 10. Calcification                                                                                 | <input type="checkbox"/> Yes<br><input type="checkbox"/> No<br><input type="checkbox"/> Not possible to determine based on test                                                                                                                                                |
| 11. Mediastinal lymphadenopathy/adenopathy                                                        | <input type="checkbox"/> Yes<br><input type="checkbox"/> No<br><input type="checkbox"/> Not possible to determine based on test                                                                                                                                                |
| 12. Enlarged Cardiac Silhouette (>50% of thoracic diameter)                                       | <input type="checkbox"/> Yes<br><input type="checkbox"/> No<br><input type="checkbox"/> Not possible to determine based on test                                                                                                                                                |
| 13. Nodules or Masses                                                                             | <input type="checkbox"/> Yes<br><input type="checkbox"/> No<br><input type="checkbox"/> Not possible to determine based on test                                                                                                                                                |
| 13a. If yes,                                                                                      | <input type="checkbox"/> Single<br><input type="checkbox"/> Multiple                                                                                                                                                                                                           |
| 13b. If yes, size of largest lesion                                                               | <input type="checkbox"/> < 1 cm <input type="checkbox"/> 1-5 cm <input type="checkbox"/> >5 cm                                                                                                                                                                                 |
| 14. Percentage of lung fields affected by any kind of lesion (alveolar or interstitial opacities) | _ _ _  %                                                                                                                                                                                                                                                                       |
| 15. Are any of these other findings seen based on chest x-ray?                                    | <input type="checkbox"/> Bronchiectasis<br><input type="checkbox"/> Emphysema<br><input type="checkbox"/> Lung fibrosis<br><input type="checkbox"/> Signs of pulmonary hypertension<br><input type="checkbox"/> Signs of right heart failure<br><input type="checkbox"/> Other |
| 16. Evolution since last CXR (If applicable)                                                      | <input type="checkbox"/> Worsened<br><input type="checkbox"/> Unchanged<br><input type="checkbox"/> Improved<br><input type="checkbox"/> Complete resolution of lesions                                                                                                        |
| <b>Image Files</b>                                                                                |                                                                                                                                                                                                                                                                                |
| 17. Number of x-ray films                                                                         | _ _                                                                                                                                                                                                                                                                            |
| 18. Original x-ray format                                                                         | <input type="checkbox"/> Digital (DICOM)<br><input type="checkbox"/> Film<br><input type="checkbox"/> Unknown                                                                                                                                                                  |
| 19. X-ray digitization date                                                                       | _ _ / _ _ / _ _ _ _                                                                                                                                                                                                                                                            |
| 20. Image upload status                                                                           | <input type="checkbox"/> Complete<br><input type="checkbox"/> Incomplete/partial                                                                                                                                                                                               |

Investigator: \_\_\_\_\_ Signature: \_\_\_\_\_ Date |\_|\_|/|\_|\_|/|\_|\_|\_|\_|



| [19] TB Treatment<br>(REDCap Flowchart Form)            |                         |                                                                                                                                                                                                                                                                                                                                                                                                                                                                                                                                                                                                                                                                                                                                                                                                                                                                                                                                                                                 |                         |
|---------------------------------------------------------|-------------------------|---------------------------------------------------------------------------------------------------------------------------------------------------------------------------------------------------------------------------------------------------------------------------------------------------------------------------------------------------------------------------------------------------------------------------------------------------------------------------------------------------------------------------------------------------------------------------------------------------------------------------------------------------------------------------------------------------------------------------------------------------------------------------------------------------------------------------------------------------------------------------------------------------------------------------------------------------------------------------------|-------------------------|
| IeDEA/TB SRN ID                                         |                         |                                                                                                                                                                                                                                                                                                                                                                                                                                                                                                                                                                                                                                                                                                                                                                                                                                                                                                                                                                                 |                         |
| Visit                                                   | Date (dd/mm/yyyy)       | Visit                                                                                                                                                                                                                                                                                                                                                                                                                                                                                                                                                                                                                                                                                                                                                                                                                                                                                                                                                                           | Date (dd/mm/yyyy)       |
| <input type="checkbox"/> Baseline                       | _ _  /  _ _  /  _ _ _ _ | <input type="checkbox"/> End of Tx                                                                                                                                                                                                                                                                                                                                                                                                                                                                                                                                                                                                                                                                                                                                                                                                                                                                                                                                              | _ _  /  _ _  /  _ _ _ _ |
| <input type="checkbox"/> Month 1                        | _ _  /  _ _  /  _ _ _ _ | <input type="checkbox"/> Tx F/R/W                                                                                                                                                                                                                                                                                                                                                                                                                                                                                                                                                                                                                                                                                                                                                                                                                                                                                                                                               | _ _  /  _ _  /  _ _ _ _ |
| <input type="checkbox"/> Month 2                        | _ _  /  _ _  /  _ _ _ _ |                                                                                                                                                                                                                                                                                                                                                                                                                                                                                                                                                                                                                                                                                                                                                                                                                                                                                                                                                                                 |                         |
| <b>TB Drug 1</b>                                        |                         |                                                                                                                                                                                                                                                                                                                                                                                                                                                                                                                                                                                                                                                                                                                                                                                                                                                                                                                                                                                 |                         |
| 1. TB Drug 1<br>(Select one)                            |                         | <input type="checkbox"/> RHZE<br><input type="checkbox"/> RH<br><input type="checkbox"/> Rifampicin<br><input type="checkbox"/> Pyrazinamide<br><input type="checkbox"/> Isoniazid<br><input type="checkbox"/> Ethambutol<br><input type="checkbox"/> Streptomycin<br><input type="checkbox"/> Rifabutin<br><input type="checkbox"/> Amikacin<br><input type="checkbox"/> Kanamycin<br><input type="checkbox"/> Capreomycin<br><input type="checkbox"/> Ofloxacin <input type="checkbox"/> Levofloxacin<br><input type="checkbox"/> Moxifloxacin<br><input type="checkbox"/> Terizidone<br><input type="checkbox"/> Cycloserine<br><input type="checkbox"/> Ethionamide<br><input type="checkbox"/> Protionamide<br><input type="checkbox"/> Para-aminosalicylic acid (PAS)<br><input type="checkbox"/> Clofazimine<br><input type="checkbox"/> Linezolid<br><input type="checkbox"/> Imipenem<br><input type="checkbox"/> Bedaquiline<br><input type="checkbox"/> Other: _____ |                         |
| 1a. If RHZE, combination:                               |                         | <input type="checkbox"/> RHZE 150/75/400/275 - 2 tablets<br><input type="checkbox"/> RHZE 150/75/400/275 - 3 tablets<br><input type="checkbox"/> RHZE 150/75/400/275 - 4 tablets<br><input type="checkbox"/> RHZE 150/75/400/275 - 5 tablets                                                                                                                                                                                                                                                                                                                                                                                                                                                                                                                                                                                                                                                                                                                                    |                         |
| 1b. If RH, combination:                                 |                         | <input type="checkbox"/> RH 150/75 - 2 tablets<br><input type="checkbox"/> RH 150/75 - 3 tablets<br><input type="checkbox"/> RH 150/75 - 4 tablets<br><input type="checkbox"/> RH 150/75 - 5 tablets<br><input type="checkbox"/> RH 300/200 - 1 tablet or capsule<br><input type="checkbox"/> RH 300/200 - 2 tablets or capsules<br><input type="checkbox"/> RH 300/200 - 1 tablet or capsule + RH 150/100 - 1 tablet<br><input type="checkbox"/> RH 300/200 - 2 tablets or capsules + RH 150/100 - 1 tablet                                                                                                                                                                                                                                                                                                                                                                                                                                                                    |                         |
| 1c. Other drugs - Dose (mg)                             |                         | _ _ _ _                                                                                                                                                                                                                                                                                                                                                                                                                                                                                                                                                                                                                                                                                                                                                                                                                                                                                                                                                                         |                         |
| 1d. How many times a day is this medication prescribed? |                         | _ _ _                                                                                                                                                                                                                                                                                                                                                                                                                                                                                                                                                                                                                                                                                                                                                                                                                                                                                                                                                                           |                         |
| 1e. How many days a week is this medication prescribed? |                         | _ _ _                                                                                                                                                                                                                                                                                                                                                                                                                                                                                                                                                                                                                                                                                                                                                                                                                                                                                                                                                                           |                         |
| 1f. Start Date<br>(dd/mm/yyyy)                          |                         | _ _  /  _ _  /  _ _ _ _                                                                                                                                                                                                                                                                                                                                                                                                                                                                                                                                                                                                                                                                                                                                                                                                                                                                                                                                                         |                         |
| 1g. Stop Date                                           |                         |                                                                                                                                                                                                                                                                                                                                                                                                                                                                                                                                                                                                                                                                                                                                                                                                                                                                                                                                                                                 |                         |



|                                                                                                                      |                                                         |                                                                                                                                                                                                                                                                                                                                                                                                                                                                                                                                                                                                                                                                                                                                                                                                                                                                                                                                                                                                                                                                                                                                                                                                                                                                                                       |                               |                                       |                             |                                       |                                     |                                     |                                       |                                      |                                    |                                      |                                     |                                       |                                       |                                                         |                                    |                                      |                                   |                                    |                                    |                                   |                                      |                                      |                                    |                                       |
|----------------------------------------------------------------------------------------------------------------------|---------------------------------------------------------|-------------------------------------------------------------------------------------------------------------------------------------------------------------------------------------------------------------------------------------------------------------------------------------------------------------------------------------------------------------------------------------------------------------------------------------------------------------------------------------------------------------------------------------------------------------------------------------------------------------------------------------------------------------------------------------------------------------------------------------------------------------------------------------------------------------------------------------------------------------------------------------------------------------------------------------------------------------------------------------------------------------------------------------------------------------------------------------------------------------------------------------------------------------------------------------------------------------------------------------------------------------------------------------------------------|-------------------------------|---------------------------------------|-----------------------------|---------------------------------------|-------------------------------------|-------------------------------------|---------------------------------------|--------------------------------------|------------------------------------|--------------------------------------|-------------------------------------|---------------------------------------|---------------------------------------|---------------------------------------------------------|------------------------------------|--------------------------------------|-----------------------------------|------------------------------------|------------------------------------|-----------------------------------|--------------------------------------|--------------------------------------|------------------------------------|---------------------------------------|
| 1<br>2<br>3<br>4                                                                                                     | 2e. How many days a week is this medication prescribed? | _ _ _                                                                                                                                                                                                                                                                                                                                                                                                                                                                                                                                                                                                                                                                                                                                                                                                                                                                                                                                                                                                                                                                                                                                                                                                                                                                                                 |                               |                                       |                             |                                       |                                     |                                     |                                       |                                      |                                    |                                      |                                     |                                       |                                       |                                                         |                                    |                                      |                                   |                                    |                                    |                                   |                                      |                                      |                                    |                                       |
| 5<br>6<br>7                                                                                                          | 2f. Start Date                                          | _ _ / _ _ / _ _ _ _  (dd/mm/yyyy)                                                                                                                                                                                                                                                                                                                                                                                                                                                                                                                                                                                                                                                                                                                                                                                                                                                                                                                                                                                                                                                                                                                                                                                                                                                                     |                               |                                       |                             |                                       |                                     |                                     |                                       |                                      |                                    |                                      |                                     |                                       |                                       |                                                         |                                    |                                      |                                   |                                    |                                    |                                   |                                      |                                      |                                    |                                       |
| 8<br>9<br>10<br>11<br>12<br>13<br>14                                                                                 | 2g. Stop Date                                           | _ _ / _ _ / _ _ _ _  (dd/mm/yyyy)<br><br><input type="checkbox"/> Treatment Ongoing (Return to update the status at next visit. Update stop date and reason once medication is stopped.)<br><input type="checkbox"/> Unknown                                                                                                                                                                                                                                                                                                                                                                                                                                                                                                                                                                                                                                                                                                                                                                                                                                                                                                                                                                                                                                                                          |                               |                                       |                             |                                       |                                     |                                     |                                       |                                      |                                    |                                      |                                     |                                       |                                       |                                                         |                                    |                                      |                                   |                                    |                                    |                                   |                                      |                                      |                                    |                                       |
| 15<br>16<br>17<br>18<br>19<br>20<br>21<br>22<br>23<br>24<br>25<br>26<br>27<br>28<br>29<br>30                         | 2h. Reason for change, interruption or completion       | <input type="checkbox"/> Completed intensive phase<br><input type="checkbox"/> Completed continuation phase<br><input type="checkbox"/> TB treatment failure<br><input type="checkbox"/> Drug resistance<br><input type="checkbox"/> Pregnancy<br><input type="checkbox"/> Side effects or toxicity<br><input type="checkbox"/> Incompatibility with ART (antiretroviral treatment)<br><input type="checkbox"/> Drug interaction<br><input type="checkbox"/> Participant stopped taking the meds<br><input type="checkbox"/> Lost to follow up<br><input type="checkbox"/> Dose adjustment (e.g. for weight change)<br><input type="checkbox"/> Death<br><input type="checkbox"/> Other _____<br><input type="checkbox"/> Unknown                                                                                                                                                                                                                                                                                                                                                                                                                                                                                                                                                                     |                               |                                       |                             |                                       |                                     |                                     |                                       |                                      |                                    |                                      |                                     |                                       |                                       |                                                         |                                    |                                      |                                   |                                    |                                    |                                   |                                      |                                      |                                    |                                       |
| 31<br>32                                                                                                             | <b>TB Drug 3</b>                                        |                                                                                                                                                                                                                                                                                                                                                                                                                                                                                                                                                                                                                                                                                                                                                                                                                                                                                                                                                                                                                                                                                                                                                                                                                                                                                                       |                               |                                       |                             |                                       |                                     |                                     |                                       |                                      |                                    |                                      |                                     |                                       |                                       |                                                         |                                    |                                      |                                   |                                    |                                    |                                   |                                      |                                      |                                    |                                       |
| 33<br>34<br>35<br>36<br>37<br>38<br>39<br>40<br>41<br>42<br>43<br>44<br>45<br>46<br>47<br>48<br>49<br>50<br>51<br>52 | 3. TB Drug 3<br>(Select one)                            | <table border="1"> <tr> <td><input type="checkbox"/> RHZE</td> <td><input type="checkbox"/> Levofloxacin</td> </tr> <tr> <td><input type="checkbox"/> RH</td> <td><input type="checkbox"/> Moxifloxacin</td> </tr> <tr> <td><input type="checkbox"/> Rifampicin</td> <td><input type="checkbox"/> Terizidone</td> </tr> <tr> <td><input type="checkbox"/> Pyrazinamide</td> <td><input type="checkbox"/> Cycloserine</td> </tr> <tr> <td><input type="checkbox"/> Isoniazid</td> <td><input type="checkbox"/> Ethionamide</td> </tr> <tr> <td><input type="checkbox"/> Ethambutol</td> <td><input type="checkbox"/> Protionamide</td> </tr> <tr> <td><input type="checkbox"/> Streptomycin</td> <td><input type="checkbox"/> Para-aminosalicylic acid (PAS)</td> </tr> <tr> <td><input type="checkbox"/> Rifabutin</td> <td><input type="checkbox"/> Clofazimine</td> </tr> <tr> <td><input type="checkbox"/> Amikacin</td> <td><input type="checkbox"/> Linezolid</td> </tr> <tr> <td><input type="checkbox"/> Kanamycin</td> <td><input type="checkbox"/> Imipenem</td> </tr> <tr> <td><input type="checkbox"/> Capreomycin</td> <td><input type="checkbox"/> Bedaquiline</td> </tr> <tr> <td><input type="checkbox"/> Ofloxacin</td> <td><input type="checkbox"/> Other: _____</td> </tr> </table> | <input type="checkbox"/> RHZE | <input type="checkbox"/> Levofloxacin | <input type="checkbox"/> RH | <input type="checkbox"/> Moxifloxacin | <input type="checkbox"/> Rifampicin | <input type="checkbox"/> Terizidone | <input type="checkbox"/> Pyrazinamide | <input type="checkbox"/> Cycloserine | <input type="checkbox"/> Isoniazid | <input type="checkbox"/> Ethionamide | <input type="checkbox"/> Ethambutol | <input type="checkbox"/> Protionamide | <input type="checkbox"/> Streptomycin | <input type="checkbox"/> Para-aminosalicylic acid (PAS) | <input type="checkbox"/> Rifabutin | <input type="checkbox"/> Clofazimine | <input type="checkbox"/> Amikacin | <input type="checkbox"/> Linezolid | <input type="checkbox"/> Kanamycin | <input type="checkbox"/> Imipenem | <input type="checkbox"/> Capreomycin | <input type="checkbox"/> Bedaquiline | <input type="checkbox"/> Ofloxacin | <input type="checkbox"/> Other: _____ |
| <input type="checkbox"/> RHZE                                                                                        | <input type="checkbox"/> Levofloxacin                   |                                                                                                                                                                                                                                                                                                                                                                                                                                                                                                                                                                                                                                                                                                                                                                                                                                                                                                                                                                                                                                                                                                                                                                                                                                                                                                       |                               |                                       |                             |                                       |                                     |                                     |                                       |                                      |                                    |                                      |                                     |                                       |                                       |                                                         |                                    |                                      |                                   |                                    |                                    |                                   |                                      |                                      |                                    |                                       |
| <input type="checkbox"/> RH                                                                                          | <input type="checkbox"/> Moxifloxacin                   |                                                                                                                                                                                                                                                                                                                                                                                                                                                                                                                                                                                                                                                                                                                                                                                                                                                                                                                                                                                                                                                                                                                                                                                                                                                                                                       |                               |                                       |                             |                                       |                                     |                                     |                                       |                                      |                                    |                                      |                                     |                                       |                                       |                                                         |                                    |                                      |                                   |                                    |                                    |                                   |                                      |                                      |                                    |                                       |
| <input type="checkbox"/> Rifampicin                                                                                  | <input type="checkbox"/> Terizidone                     |                                                                                                                                                                                                                                                                                                                                                                                                                                                                                                                                                                                                                                                                                                                                                                                                                                                                                                                                                                                                                                                                                                                                                                                                                                                                                                       |                               |                                       |                             |                                       |                                     |                                     |                                       |                                      |                                    |                                      |                                     |                                       |                                       |                                                         |                                    |                                      |                                   |                                    |                                    |                                   |                                      |                                      |                                    |                                       |
| <input type="checkbox"/> Pyrazinamide                                                                                | <input type="checkbox"/> Cycloserine                    |                                                                                                                                                                                                                                                                                                                                                                                                                                                                                                                                                                                                                                                                                                                                                                                                                                                                                                                                                                                                                                                                                                                                                                                                                                                                                                       |                               |                                       |                             |                                       |                                     |                                     |                                       |                                      |                                    |                                      |                                     |                                       |                                       |                                                         |                                    |                                      |                                   |                                    |                                    |                                   |                                      |                                      |                                    |                                       |
| <input type="checkbox"/> Isoniazid                                                                                   | <input type="checkbox"/> Ethionamide                    |                                                                                                                                                                                                                                                                                                                                                                                                                                                                                                                                                                                                                                                                                                                                                                                                                                                                                                                                                                                                                                                                                                                                                                                                                                                                                                       |                               |                                       |                             |                                       |                                     |                                     |                                       |                                      |                                    |                                      |                                     |                                       |                                       |                                                         |                                    |                                      |                                   |                                    |                                    |                                   |                                      |                                      |                                    |                                       |
| <input type="checkbox"/> Ethambutol                                                                                  | <input type="checkbox"/> Protionamide                   |                                                                                                                                                                                                                                                                                                                                                                                                                                                                                                                                                                                                                                                                                                                                                                                                                                                                                                                                                                                                                                                                                                                                                                                                                                                                                                       |                               |                                       |                             |                                       |                                     |                                     |                                       |                                      |                                    |                                      |                                     |                                       |                                       |                                                         |                                    |                                      |                                   |                                    |                                    |                                   |                                      |                                      |                                    |                                       |
| <input type="checkbox"/> Streptomycin                                                                                | <input type="checkbox"/> Para-aminosalicylic acid (PAS) |                                                                                                                                                                                                                                                                                                                                                                                                                                                                                                                                                                                                                                                                                                                                                                                                                                                                                                                                                                                                                                                                                                                                                                                                                                                                                                       |                               |                                       |                             |                                       |                                     |                                     |                                       |                                      |                                    |                                      |                                     |                                       |                                       |                                                         |                                    |                                      |                                   |                                    |                                    |                                   |                                      |                                      |                                    |                                       |
| <input type="checkbox"/> Rifabutin                                                                                   | <input type="checkbox"/> Clofazimine                    |                                                                                                                                                                                                                                                                                                                                                                                                                                                                                                                                                                                                                                                                                                                                                                                                                                                                                                                                                                                                                                                                                                                                                                                                                                                                                                       |                               |                                       |                             |                                       |                                     |                                     |                                       |                                      |                                    |                                      |                                     |                                       |                                       |                                                         |                                    |                                      |                                   |                                    |                                    |                                   |                                      |                                      |                                    |                                       |
| <input type="checkbox"/> Amikacin                                                                                    | <input type="checkbox"/> Linezolid                      |                                                                                                                                                                                                                                                                                                                                                                                                                                                                                                                                                                                                                                                                                                                                                                                                                                                                                                                                                                                                                                                                                                                                                                                                                                                                                                       |                               |                                       |                             |                                       |                                     |                                     |                                       |                                      |                                    |                                      |                                     |                                       |                                       |                                                         |                                    |                                      |                                   |                                    |                                    |                                   |                                      |                                      |                                    |                                       |
| <input type="checkbox"/> Kanamycin                                                                                   | <input type="checkbox"/> Imipenem                       |                                                                                                                                                                                                                                                                                                                                                                                                                                                                                                                                                                                                                                                                                                                                                                                                                                                                                                                                                                                                                                                                                                                                                                                                                                                                                                       |                               |                                       |                             |                                       |                                     |                                     |                                       |                                      |                                    |                                      |                                     |                                       |                                       |                                                         |                                    |                                      |                                   |                                    |                                    |                                   |                                      |                                      |                                    |                                       |
| <input type="checkbox"/> Capreomycin                                                                                 | <input type="checkbox"/> Bedaquiline                    |                                                                                                                                                                                                                                                                                                                                                                                                                                                                                                                                                                                                                                                                                                                                                                                                                                                                                                                                                                                                                                                                                                                                                                                                                                                                                                       |                               |                                       |                             |                                       |                                     |                                     |                                       |                                      |                                    |                                      |                                     |                                       |                                       |                                                         |                                    |                                      |                                   |                                    |                                    |                                   |                                      |                                      |                                    |                                       |
| <input type="checkbox"/> Ofloxacin                                                                                   | <input type="checkbox"/> Other: _____                   |                                                                                                                                                                                                                                                                                                                                                                                                                                                                                                                                                                                                                                                                                                                                                                                                                                                                                                                                                                                                                                                                                                                                                                                                                                                                                                       |                               |                                       |                             |                                       |                                     |                                     |                                       |                                      |                                    |                                      |                                     |                                       |                                       |                                                         |                                    |                                      |                                   |                                    |                                    |                                   |                                      |                                      |                                    |                                       |
| 53<br>54<br>55<br>56<br>57                                                                                           | 3a. If RHZE, combination:                               | <input type="checkbox"/> RHZE 150/75/400/275 - 2 tablets<br><input type="checkbox"/> RHZE 150/75/400/275 - 3 tablets<br><input type="checkbox"/> RHZE 150/75/400/275 - 4 tablets<br><input type="checkbox"/> RHZE 150/75/400/275 - 5 tablets                                                                                                                                                                                                                                                                                                                                                                                                                                                                                                                                                                                                                                                                                                                                                                                                                                                                                                                                                                                                                                                          |                               |                                       |                             |                                       |                                     |                                     |                                       |                                      |                                    |                                      |                                     |                                       |                                       |                                                         |                                    |                                      |                                   |                                    |                                    |                                   |                                      |                                      |                                    |                                       |
| 58<br>59<br>60                                                                                                       | 3b. If RH, combination:                                 | <input type="checkbox"/> RH 150/75 - 2 tablets<br><input type="checkbox"/> RH 150/75 - 3 tablets<br><input type="checkbox"/> RH 150/75 - 4 tablets                                                                                                                                                                                                                                                                                                                                                                                                                                                                                                                                                                                                                                                                                                                                                                                                                                                                                                                                                                                                                                                                                                                                                    |                               |                                       |                             |                                       |                                     |                                     |                                       |                                      |                                    |                                      |                                     |                                       |                                       |                                                         |                                    |                                      |                                   |                                    |                                    |                                   |                                      |                                      |                                    |                                       |

**leDEA TB SRN**

|                                                                                                          |                                                                                                                                                                                                                                                                                                                                                                                                                                                                                                                                                                                                                                                                                                                                                                                        |
|----------------------------------------------------------------------------------------------------------|----------------------------------------------------------------------------------------------------------------------------------------------------------------------------------------------------------------------------------------------------------------------------------------------------------------------------------------------------------------------------------------------------------------------------------------------------------------------------------------------------------------------------------------------------------------------------------------------------------------------------------------------------------------------------------------------------------------------------------------------------------------------------------------|
| 1<br>2<br>3<br>4<br>5<br>6<br>7                                                                          | <input type="checkbox"/> RH 150/75 - 5 tablets<br><input type="checkbox"/> RH 300/200 - 1 tablet or capsule<br><input type="checkbox"/> RH 300/200 - 2 tablets or capsules<br><input type="checkbox"/> RH 300/200 - 1 tablet or capsule + RH 150/100 - 1 tablet<br><input type="checkbox"/> RH 300/200 - 2 tablets or capsules + RH 150/100 - 1 tablet                                                                                                                                                                                                                                                                                                                                                                                                                                 |
| 8<br>9                                                                                                   | 3c. Other drugs - Dose (mg)                                                                                                                                                                                                                                                                                                                                                                                                                                                                                                                                                                                                                                                                                                                                                            |
| 10<br>11<br>12                                                                                           | 3d. How many times a day is this medication prescribed?                                                                                                                                                                                                                                                                                                                                                                                                                                                                                                                                                                                                                                                                                                                                |
| 13<br>14<br>15                                                                                           | 3e. How many days a week is this medication prescribed?                                                                                                                                                                                                                                                                                                                                                                                                                                                                                                                                                                                                                                                                                                                                |
| 16<br>17<br>18                                                                                           | 3f. Start Date       /       /             (dd/mm/yyyy)                                                                                                                                                                                                                                                                                                                                                                                                                                                                                                                                                                                                                                                                                                                                |
| 19<br>20<br>21<br>22<br>23<br>24<br>25                                                                   | 3g. Stop Date       /       /             (dd/mm/yyyy)<br><input type="checkbox"/> Treatment Ongoing ( <i>Return to update the status at next visit. Update stop date and reason once medication is stopped.</i> )<br><input type="checkbox"/> Unknown                                                                                                                                                                                                                                                                                                                                                                                                                                                                                                                                 |
| 26<br>27<br>28<br>29<br>30<br>31<br>32<br>33<br>34<br>35<br>36<br>37<br>38<br>39<br>40<br>41<br>42       | 3h. Reason for change, interruption or completion<br><input type="checkbox"/> Completed intensive phase<br><input type="checkbox"/> Completed continuation phase<br><input type="checkbox"/> TB treatment failure<br><input type="checkbox"/> Drug resistance<br><input type="checkbox"/> Pregnancy<br><input type="checkbox"/> Side effects or toxicity<br><input type="checkbox"/> Incompatibility with ART (antiretroviral treatment)<br><input type="checkbox"/> Drug interaction<br><input type="checkbox"/> Participant stopped taking the meds<br><input type="checkbox"/> Lost to follow up<br><input type="checkbox"/> Dose adjustment (e.g. for weight change)<br><input type="checkbox"/> Death<br><input type="checkbox"/> Other _____<br><input type="checkbox"/> Unknown |
| 43<br>44<br>45<br>46<br>47<br>48<br>49<br>50<br>51<br>52<br>53<br>54<br>55<br>56<br>57<br>58<br>59<br>60 | <b>TB Drug 4</b>                                                                                                                                                                                                                                                                                                                                                                                                                                                                                                                                                                                                                                                                                                                                                                       |

## IeDEA TB SRN

|                                                                                                                                                                            |                                                                                                                                                                                                                                                                                                                                                                                                                                                                                                                                                                                                                                                                                                                                                                                                                                                                                                                                                                                                                                                                                                                                                                                                                                                                                                       |                               |                                       |                             |                                       |                                     |                                     |                                       |                                      |                                    |                                      |                                     |                                       |                                       |                                                         |                                    |                                      |                                   |                                    |                                    |                                   |                                      |                                      |                                    |                                       |
|----------------------------------------------------------------------------------------------------------------------------------------------------------------------------|-------------------------------------------------------------------------------------------------------------------------------------------------------------------------------------------------------------------------------------------------------------------------------------------------------------------------------------------------------------------------------------------------------------------------------------------------------------------------------------------------------------------------------------------------------------------------------------------------------------------------------------------------------------------------------------------------------------------------------------------------------------------------------------------------------------------------------------------------------------------------------------------------------------------------------------------------------------------------------------------------------------------------------------------------------------------------------------------------------------------------------------------------------------------------------------------------------------------------------------------------------------------------------------------------------|-------------------------------|---------------------------------------|-----------------------------|---------------------------------------|-------------------------------------|-------------------------------------|---------------------------------------|--------------------------------------|------------------------------------|--------------------------------------|-------------------------------------|---------------------------------------|---------------------------------------|---------------------------------------------------------|------------------------------------|--------------------------------------|-----------------------------------|------------------------------------|------------------------------------|-----------------------------------|--------------------------------------|--------------------------------------|------------------------------------|---------------------------------------|
| <p>1<br/>2<br/>3<br/>4<br/>5<br/>6<br/>7<br/>8<br/>9<br/>10<br/>11<br/>12<br/>13<br/>14<br/>15<br/>16<br/>17<br/>18<br/>19<br/>20</p> <p>4. TB Drug 4<br/>(Select one)</p> | <table border="1"> <tr> <td><input type="checkbox"/> RHZE</td> <td><input type="checkbox"/> Levofloxacin</td> </tr> <tr> <td><input type="checkbox"/> RH</td> <td><input type="checkbox"/> Moxifloxacin</td> </tr> <tr> <td><input type="checkbox"/> Rifampicin</td> <td><input type="checkbox"/> Terizidone</td> </tr> <tr> <td><input type="checkbox"/> Pyrazinamide</td> <td><input type="checkbox"/> Cycloserine</td> </tr> <tr> <td><input type="checkbox"/> Isoniazid</td> <td><input type="checkbox"/> Ethionamide</td> </tr> <tr> <td><input type="checkbox"/> Ethambutol</td> <td><input type="checkbox"/> Protionamide</td> </tr> <tr> <td><input type="checkbox"/> Streptomycin</td> <td><input type="checkbox"/> Para-aminosalicylic acid (PAS)</td> </tr> <tr> <td><input type="checkbox"/> Rifabutin</td> <td><input type="checkbox"/> Clofazimine</td> </tr> <tr> <td><input type="checkbox"/> Amikacin</td> <td><input type="checkbox"/> Linezolid</td> </tr> <tr> <td><input type="checkbox"/> Kanamycin</td> <td><input type="checkbox"/> Imipenem</td> </tr> <tr> <td><input type="checkbox"/> Capreomycin</td> <td><input type="checkbox"/> Bedaquiline</td> </tr> <tr> <td><input type="checkbox"/> Ofloxacin</td> <td><input type="checkbox"/> Other: _____</td> </tr> </table> | <input type="checkbox"/> RHZE | <input type="checkbox"/> Levofloxacin | <input type="checkbox"/> RH | <input type="checkbox"/> Moxifloxacin | <input type="checkbox"/> Rifampicin | <input type="checkbox"/> Terizidone | <input type="checkbox"/> Pyrazinamide | <input type="checkbox"/> Cycloserine | <input type="checkbox"/> Isoniazid | <input type="checkbox"/> Ethionamide | <input type="checkbox"/> Ethambutol | <input type="checkbox"/> Protionamide | <input type="checkbox"/> Streptomycin | <input type="checkbox"/> Para-aminosalicylic acid (PAS) | <input type="checkbox"/> Rifabutin | <input type="checkbox"/> Clofazimine | <input type="checkbox"/> Amikacin | <input type="checkbox"/> Linezolid | <input type="checkbox"/> Kanamycin | <input type="checkbox"/> Imipenem | <input type="checkbox"/> Capreomycin | <input type="checkbox"/> Bedaquiline | <input type="checkbox"/> Ofloxacin | <input type="checkbox"/> Other: _____ |
| <input type="checkbox"/> RHZE                                                                                                                                              | <input type="checkbox"/> Levofloxacin                                                                                                                                                                                                                                                                                                                                                                                                                                                                                                                                                                                                                                                                                                                                                                                                                                                                                                                                                                                                                                                                                                                                                                                                                                                                 |                               |                                       |                             |                                       |                                     |                                     |                                       |                                      |                                    |                                      |                                     |                                       |                                       |                                                         |                                    |                                      |                                   |                                    |                                    |                                   |                                      |                                      |                                    |                                       |
| <input type="checkbox"/> RH                                                                                                                                                | <input type="checkbox"/> Moxifloxacin                                                                                                                                                                                                                                                                                                                                                                                                                                                                                                                                                                                                                                                                                                                                                                                                                                                                                                                                                                                                                                                                                                                                                                                                                                                                 |                               |                                       |                             |                                       |                                     |                                     |                                       |                                      |                                    |                                      |                                     |                                       |                                       |                                                         |                                    |                                      |                                   |                                    |                                    |                                   |                                      |                                      |                                    |                                       |
| <input type="checkbox"/> Rifampicin                                                                                                                                        | <input type="checkbox"/> Terizidone                                                                                                                                                                                                                                                                                                                                                                                                                                                                                                                                                                                                                                                                                                                                                                                                                                                                                                                                                                                                                                                                                                                                                                                                                                                                   |                               |                                       |                             |                                       |                                     |                                     |                                       |                                      |                                    |                                      |                                     |                                       |                                       |                                                         |                                    |                                      |                                   |                                    |                                    |                                   |                                      |                                      |                                    |                                       |
| <input type="checkbox"/> Pyrazinamide                                                                                                                                      | <input type="checkbox"/> Cycloserine                                                                                                                                                                                                                                                                                                                                                                                                                                                                                                                                                                                                                                                                                                                                                                                                                                                                                                                                                                                                                                                                                                                                                                                                                                                                  |                               |                                       |                             |                                       |                                     |                                     |                                       |                                      |                                    |                                      |                                     |                                       |                                       |                                                         |                                    |                                      |                                   |                                    |                                    |                                   |                                      |                                      |                                    |                                       |
| <input type="checkbox"/> Isoniazid                                                                                                                                         | <input type="checkbox"/> Ethionamide                                                                                                                                                                                                                                                                                                                                                                                                                                                                                                                                                                                                                                                                                                                                                                                                                                                                                                                                                                                                                                                                                                                                                                                                                                                                  |                               |                                       |                             |                                       |                                     |                                     |                                       |                                      |                                    |                                      |                                     |                                       |                                       |                                                         |                                    |                                      |                                   |                                    |                                    |                                   |                                      |                                      |                                    |                                       |
| <input type="checkbox"/> Ethambutol                                                                                                                                        | <input type="checkbox"/> Protionamide                                                                                                                                                                                                                                                                                                                                                                                                                                                                                                                                                                                                                                                                                                                                                                                                                                                                                                                                                                                                                                                                                                                                                                                                                                                                 |                               |                                       |                             |                                       |                                     |                                     |                                       |                                      |                                    |                                      |                                     |                                       |                                       |                                                         |                                    |                                      |                                   |                                    |                                    |                                   |                                      |                                      |                                    |                                       |
| <input type="checkbox"/> Streptomycin                                                                                                                                      | <input type="checkbox"/> Para-aminosalicylic acid (PAS)                                                                                                                                                                                                                                                                                                                                                                                                                                                                                                                                                                                                                                                                                                                                                                                                                                                                                                                                                                                                                                                                                                                                                                                                                                               |                               |                                       |                             |                                       |                                     |                                     |                                       |                                      |                                    |                                      |                                     |                                       |                                       |                                                         |                                    |                                      |                                   |                                    |                                    |                                   |                                      |                                      |                                    |                                       |
| <input type="checkbox"/> Rifabutin                                                                                                                                         | <input type="checkbox"/> Clofazimine                                                                                                                                                                                                                                                                                                                                                                                                                                                                                                                                                                                                                                                                                                                                                                                                                                                                                                                                                                                                                                                                                                                                                                                                                                                                  |                               |                                       |                             |                                       |                                     |                                     |                                       |                                      |                                    |                                      |                                     |                                       |                                       |                                                         |                                    |                                      |                                   |                                    |                                    |                                   |                                      |                                      |                                    |                                       |
| <input type="checkbox"/> Amikacin                                                                                                                                          | <input type="checkbox"/> Linezolid                                                                                                                                                                                                                                                                                                                                                                                                                                                                                                                                                                                                                                                                                                                                                                                                                                                                                                                                                                                                                                                                                                                                                                                                                                                                    |                               |                                       |                             |                                       |                                     |                                     |                                       |                                      |                                    |                                      |                                     |                                       |                                       |                                                         |                                    |                                      |                                   |                                    |                                    |                                   |                                      |                                      |                                    |                                       |
| <input type="checkbox"/> Kanamycin                                                                                                                                         | <input type="checkbox"/> Imipenem                                                                                                                                                                                                                                                                                                                                                                                                                                                                                                                                                                                                                                                                                                                                                                                                                                                                                                                                                                                                                                                                                                                                                                                                                                                                     |                               |                                       |                             |                                       |                                     |                                     |                                       |                                      |                                    |                                      |                                     |                                       |                                       |                                                         |                                    |                                      |                                   |                                    |                                    |                                   |                                      |                                      |                                    |                                       |
| <input type="checkbox"/> Capreomycin                                                                                                                                       | <input type="checkbox"/> Bedaquiline                                                                                                                                                                                                                                                                                                                                                                                                                                                                                                                                                                                                                                                                                                                                                                                                                                                                                                                                                                                                                                                                                                                                                                                                                                                                  |                               |                                       |                             |                                       |                                     |                                     |                                       |                                      |                                    |                                      |                                     |                                       |                                       |                                                         |                                    |                                      |                                   |                                    |                                    |                                   |                                      |                                      |                                    |                                       |
| <input type="checkbox"/> Ofloxacin                                                                                                                                         | <input type="checkbox"/> Other: _____                                                                                                                                                                                                                                                                                                                                                                                                                                                                                                                                                                                                                                                                                                                                                                                                                                                                                                                                                                                                                                                                                                                                                                                                                                                                 |                               |                                       |                             |                                       |                                     |                                     |                                       |                                      |                                    |                                      |                                     |                                       |                                       |                                                         |                                    |                                      |                                   |                                    |                                    |                                   |                                      |                                      |                                    |                                       |
| <p>21<br/>22<br/>23<br/>24<br/>25<br/>26</p> <p>4a. If RHZE, combination:</p>                                                                                              | <p><input type="checkbox"/> RHZE 150/75/400/275 - 2 tablets<br/> <input type="checkbox"/> RHZE 150/75/400/275 - 3 tablets<br/> <input type="checkbox"/> RHZE 150/75/400/275 - 4 tablets<br/> <input type="checkbox"/> RHZE 150/75/400/275 - 5 tablets</p>                                                                                                                                                                                                                                                                                                                                                                                                                                                                                                                                                                                                                                                                                                                                                                                                                                                                                                                                                                                                                                             |                               |                                       |                             |                                       |                                     |                                     |                                       |                                      |                                    |                                      |                                     |                                       |                                       |                                                         |                                    |                                      |                                   |                                    |                                    |                                   |                                      |                                      |                                    |                                       |
| <p>27<br/>28<br/>29<br/>30<br/>31<br/>32<br/>33<br/>34<br/>35</p> <p>4b. If RH, combination:</p>                                                                           | <p><input type="checkbox"/> RH 150/75 - 2 tablets<br/> <input type="checkbox"/> RH 150/75 - 3 tablets<br/> <input type="checkbox"/> RH 150/75 - 4 tablets<br/> <input type="checkbox"/> RH 150/75 - 5 tablets<br/> <input type="checkbox"/> RH 300/200 - 1 tablet or capsule<br/> <input type="checkbox"/> RH 300/200 - 2 tablets or capsules<br/> <input type="checkbox"/> RH 300/200 - 1 tablet or capsule + RH 150/100 - 1 tablet<br/> <input type="checkbox"/> RH 300/200 - 2 tablets or capsules + RH 150/100 - 1 tablet</p>                                                                                                                                                                                                                                                                                                                                                                                                                                                                                                                                                                                                                                                                                                                                                                     |                               |                                       |                             |                                       |                                     |                                     |                                       |                                      |                                    |                                      |                                     |                                       |                                       |                                                         |                                    |                                      |                                   |                                    |                                    |                                   |                                      |                                      |                                    |                                       |
| <p>36<br/>37</p> <p>4c. Other drugs - Dose (mg)</p>                                                                                                                        | <p> _ _ _ _ </p>                                                                                                                                                                                                                                                                                                                                                                                                                                                                                                                                                                                                                                                                                                                                                                                                                                                                                                                                                                                                                                                                                                                                                                                                                                                                                      |                               |                                       |                             |                                       |                                     |                                     |                                       |                                      |                                    |                                      |                                     |                                       |                                       |                                                         |                                    |                                      |                                   |                                    |                                    |                                   |                                      |                                      |                                    |                                       |
| <p>38<br/>39<br/>40</p> <p>4d. How many times a day is this medication prescribed?</p>                                                                                     | <p> _ _ _ </p>                                                                                                                                                                                                                                                                                                                                                                                                                                                                                                                                                                                                                                                                                                                                                                                                                                                                                                                                                                                                                                                                                                                                                                                                                                                                                        |                               |                                       |                             |                                       |                                     |                                     |                                       |                                      |                                    |                                      |                                     |                                       |                                       |                                                         |                                    |                                      |                                   |                                    |                                    |                                   |                                      |                                      |                                    |                                       |
| <p>41<br/>42<br/>43</p> <p>4e. How many days a week is this medication prescribed?</p>                                                                                     | <p> _ _ _ </p>                                                                                                                                                                                                                                                                                                                                                                                                                                                                                                                                                                                                                                                                                                                                                                                                                                                                                                                                                                                                                                                                                                                                                                                                                                                                                        |                               |                                       |                             |                                       |                                     |                                     |                                       |                                      |                                    |                                      |                                     |                                       |                                       |                                                         |                                    |                                      |                                   |                                    |                                    |                                   |                                      |                                      |                                    |                                       |
| <p>44<br/>45</p> <p>4f. Start Date</p>                                                                                                                                     | <p> _ _ / _ _ / _ _ _ _  (dd/mm/yyyy)</p>                                                                                                                                                                                                                                                                                                                                                                                                                                                                                                                                                                                                                                                                                                                                                                                                                                                                                                                                                                                                                                                                                                                                                                                                                                                             |                               |                                       |                             |                                       |                                     |                                     |                                       |                                      |                                    |                                      |                                     |                                       |                                       |                                                         |                                    |                                      |                                   |                                    |                                    |                                   |                                      |                                      |                                    |                                       |
| <p>46<br/>47<br/>48<br/>49<br/>50<br/>51<br/>52<br/>53</p> <p>4g. Stop Date</p>                                                                                            | <p> _ _ / _ _ / _ _ _ _  (dd/mm/yyyy)</p> <p><input type="checkbox"/> Treatment Ongoing (Return to update the status at next visit. Update stop date and reason once medication is stopped.)<br/> <input type="checkbox"/> Unknown</p>                                                                                                                                                                                                                                                                                                                                                                                                                                                                                                                                                                                                                                                                                                                                                                                                                                                                                                                                                                                                                                                                |                               |                                       |                             |                                       |                                     |                                     |                                       |                                      |                                    |                                      |                                     |                                       |                                       |                                                         |                                    |                                      |                                   |                                    |                                    |                                   |                                      |                                      |                                    |                                       |
| <p>54<br/>55<br/>56<br/>57<br/>58<br/>59<br/>60</p> <p>4h. Reason for change, interruption or completion</p>                                                               | <p><input type="checkbox"/> Completed intensive phase<br/> <input type="checkbox"/> Completed continuation phase<br/> <input type="checkbox"/> TB treatment failure<br/> <input type="checkbox"/> Drug resistance<br/> <input type="checkbox"/> Pregnancy<br/> <input type="checkbox"/> Side effects or toxicity</p>                                                                                                                                                                                                                                                                                                                                                                                                                                                                                                                                                                                                                                                                                                                                                                                                                                                                                                                                                                                  |                               |                                       |                             |                                       |                                     |                                     |                                       |                                      |                                    |                                      |                                     |                                       |                                       |                                                         |                                    |                                      |                                   |                                    |                                    |                                   |                                      |                                      |                                    |                                       |

**leDEA TB SRN**

|                                                                                              |                                                                                                                                                                                                                                                                                                                                                                                                                                                                                                                                                                                                                                                                                                                                                                                                                                                                                                                                                                                                                                                                                                                                                                                |                                                                                                                                                                                                                                                                                                                                                                                                                                                                                                               |                                                                                                                                                                                                                                                                                                                                                                                                                                                                   |                                                                                                                                                                                                                                                                                                                                                                                                                                                                                                               |
|----------------------------------------------------------------------------------------------|--------------------------------------------------------------------------------------------------------------------------------------------------------------------------------------------------------------------------------------------------------------------------------------------------------------------------------------------------------------------------------------------------------------------------------------------------------------------------------------------------------------------------------------------------------------------------------------------------------------------------------------------------------------------------------------------------------------------------------------------------------------------------------------------------------------------------------------------------------------------------------------------------------------------------------------------------------------------------------------------------------------------------------------------------------------------------------------------------------------------------------------------------------------------------------|---------------------------------------------------------------------------------------------------------------------------------------------------------------------------------------------------------------------------------------------------------------------------------------------------------------------------------------------------------------------------------------------------------------------------------------------------------------------------------------------------------------|-------------------------------------------------------------------------------------------------------------------------------------------------------------------------------------------------------------------------------------------------------------------------------------------------------------------------------------------------------------------------------------------------------------------------------------------------------------------|---------------------------------------------------------------------------------------------------------------------------------------------------------------------------------------------------------------------------------------------------------------------------------------------------------------------------------------------------------------------------------------------------------------------------------------------------------------------------------------------------------------|
| 1<br>2<br>3<br>4<br>5<br>6<br>7<br>8<br>9<br>10                                              | <input type="checkbox"/> Incompatibility with ART (antiretroviral treatment)<br><input type="checkbox"/> Drug interaction<br><input type="checkbox"/> Participant stopped taking the meds<br><input type="checkbox"/> Lost to follow up<br><input type="checkbox"/> Dose adjustment (e.g. for weight change)<br><input type="checkbox"/> Death<br><input type="checkbox"/> Other _____<br><input type="checkbox"/> Unknown                                                                                                                                                                                                                                                                                                                                                                                                                                                                                                                                                                                                                                                                                                                                                     |                                                                                                                                                                                                                                                                                                                                                                                                                                                                                                               |                                                                                                                                                                                                                                                                                                                                                                                                                                                                   |                                                                                                                                                                                                                                                                                                                                                                                                                                                                                                               |
| 11<br>12                                                                                     | <b>TB Drug 5</b>                                                                                                                                                                                                                                                                                                                                                                                                                                                                                                                                                                                                                                                                                                                                                                                                                                                                                                                                                                                                                                                                                                                                                               |                                                                                                                                                                                                                                                                                                                                                                                                                                                                                                               |                                                                                                                                                                                                                                                                                                                                                                                                                                                                   |                                                                                                                                                                                                                                                                                                                                                                                                                                                                                                               |
| 13<br>14<br>15<br>16<br>17<br>18<br>19<br>20<br>21<br>22<br>23<br>24<br>25<br>26<br>27<br>28 | <table border="1"> <tr> <td>           5. TB Drug 5<br/>           (Select one)         </td> <td> <input type="checkbox"/> RHZE<br/> <input type="checkbox"/> RH<br/> <input type="checkbox"/> Rifampicin<br/> <input type="checkbox"/> Pyrazinamide<br/> <input type="checkbox"/> Isoniazid<br/> <input type="checkbox"/> Ethambutol<br/> <input type="checkbox"/> Streptomycin<br/> <input type="checkbox"/> Rifabutin<br/> <input type="checkbox"/> Amikacin<br/> <input type="checkbox"/> Kanamycin<br/> <input type="checkbox"/> Capreomycin<br/> <input type="checkbox"/> Ofloxacin         </td> <td> <input type="checkbox"/> Levofloxacin<br/> <input type="checkbox"/> Moxifloxacin<br/> <input type="checkbox"/> Terizidone<br/> <input type="checkbox"/> Cycloserine<br/> <input type="checkbox"/> Ethionamide<br/> <input type="checkbox"/> Protionamide<br/> <input type="checkbox"/> Para-aminosalicylic acid (PAS)<br/> <input type="checkbox"/> Clofazimine<br/> <input type="checkbox"/> Linezolid<br/> <input type="checkbox"/> Imipenem<br/> <input type="checkbox"/> Bedaquiline<br/> <input type="checkbox"/> Other: _____         </td> </tr> </table> | 5. TB Drug 5<br>(Select one)                                                                                                                                                                                                                                                                                                                                                                                                                                                                                  | <input type="checkbox"/> RHZE<br><input type="checkbox"/> RH<br><input type="checkbox"/> Rifampicin<br><input type="checkbox"/> Pyrazinamide<br><input type="checkbox"/> Isoniazid<br><input type="checkbox"/> Ethambutol<br><input type="checkbox"/> Streptomycin<br><input type="checkbox"/> Rifabutin<br><input type="checkbox"/> Amikacin<br><input type="checkbox"/> Kanamycin<br><input type="checkbox"/> Capreomycin<br><input type="checkbox"/> Ofloxacin | <input type="checkbox"/> Levofloxacin<br><input type="checkbox"/> Moxifloxacin<br><input type="checkbox"/> Terizidone<br><input type="checkbox"/> Cycloserine<br><input type="checkbox"/> Ethionamide<br><input type="checkbox"/> Protionamide<br><input type="checkbox"/> Para-aminosalicylic acid (PAS)<br><input type="checkbox"/> Clofazimine<br><input type="checkbox"/> Linezolid<br><input type="checkbox"/> Imipenem<br><input type="checkbox"/> Bedaquiline<br><input type="checkbox"/> Other: _____ |
| 5. TB Drug 5<br>(Select one)                                                                 | <input type="checkbox"/> RHZE<br><input type="checkbox"/> RH<br><input type="checkbox"/> Rifampicin<br><input type="checkbox"/> Pyrazinamide<br><input type="checkbox"/> Isoniazid<br><input type="checkbox"/> Ethambutol<br><input type="checkbox"/> Streptomycin<br><input type="checkbox"/> Rifabutin<br><input type="checkbox"/> Amikacin<br><input type="checkbox"/> Kanamycin<br><input type="checkbox"/> Capreomycin<br><input type="checkbox"/> Ofloxacin                                                                                                                                                                                                                                                                                                                                                                                                                                                                                                                                                                                                                                                                                                              | <input type="checkbox"/> Levofloxacin<br><input type="checkbox"/> Moxifloxacin<br><input type="checkbox"/> Terizidone<br><input type="checkbox"/> Cycloserine<br><input type="checkbox"/> Ethionamide<br><input type="checkbox"/> Protionamide<br><input type="checkbox"/> Para-aminosalicylic acid (PAS)<br><input type="checkbox"/> Clofazimine<br><input type="checkbox"/> Linezolid<br><input type="checkbox"/> Imipenem<br><input type="checkbox"/> Bedaquiline<br><input type="checkbox"/> Other: _____ |                                                                                                                                                                                                                                                                                                                                                                                                                                                                   |                                                                                                                                                                                                                                                                                                                                                                                                                                                                                                               |
| 29<br>30<br>31<br>32<br>33                                                                   | 5a. If RHZE, combination:<br><input type="checkbox"/> RHZE 150/75/400/275 - 2 tablets<br><input type="checkbox"/> RHZE 150/75/400/275 - 3 tablets<br><input type="checkbox"/> RHZE 150/75/400/275 - 4 tablets<br><input type="checkbox"/> RHZE 150/75/400/275 - 5 tablets                                                                                                                                                                                                                                                                                                                                                                                                                                                                                                                                                                                                                                                                                                                                                                                                                                                                                                      |                                                                                                                                                                                                                                                                                                                                                                                                                                                                                                               |                                                                                                                                                                                                                                                                                                                                                                                                                                                                   |                                                                                                                                                                                                                                                                                                                                                                                                                                                                                                               |
| 34<br>35<br>36<br>37<br>38<br>39<br>40<br>41<br>42<br>43                                     | 5b. If RH, combination:<br><input type="checkbox"/> RH 150/75 - 2 tablets<br><input type="checkbox"/> RH 150/75 - 3 tablets<br><input type="checkbox"/> RH 150/75 - 4 tablets<br><input type="checkbox"/> RH 150/75 - 5 tablets<br><input type="checkbox"/> RH 300/200 - 1 tablet or capsule<br><input type="checkbox"/> RH 300/200 - 2 tablets or capsules<br><input type="checkbox"/> RH 300/200 - 1 tablet or capsule + RH 150/100 - 1 tablet<br><input type="checkbox"/> RH 300/200 - 2 tablets or capsules + RH 150/100 - 1 tablet                                                                                                                                                                                                                                                                                                                                                                                                                                                                                                                                                                                                                                        |                                                                                                                                                                                                                                                                                                                                                                                                                                                                                                               |                                                                                                                                                                                                                                                                                                                                                                                                                                                                   |                                                                                                                                                                                                                                                                                                                                                                                                                                                                                                               |
| 44<br>45                                                                                     | 5c. Other drugs - Dose (mg)<br> _ _ _ _                                                                                                                                                                                                                                                                                                                                                                                                                                                                                                                                                                                                                                                                                                                                                                                                                                                                                                                                                                                                                                                                                                                                        |                                                                                                                                                                                                                                                                                                                                                                                                                                                                                                               |                                                                                                                                                                                                                                                                                                                                                                                                                                                                   |                                                                                                                                                                                                                                                                                                                                                                                                                                                                                                               |
| 46<br>47<br>48                                                                               | 5d. How many times a day is this medication prescribed?<br> _ _ _                                                                                                                                                                                                                                                                                                                                                                                                                                                                                                                                                                                                                                                                                                                                                                                                                                                                                                                                                                                                                                                                                                              |                                                                                                                                                                                                                                                                                                                                                                                                                                                                                                               |                                                                                                                                                                                                                                                                                                                                                                                                                                                                   |                                                                                                                                                                                                                                                                                                                                                                                                                                                                                                               |
| 49<br>50<br>51                                                                               | 5e. How many days a week is this medication prescribed?<br> _ _ _                                                                                                                                                                                                                                                                                                                                                                                                                                                                                                                                                                                                                                                                                                                                                                                                                                                                                                                                                                                                                                                                                                              |                                                                                                                                                                                                                                                                                                                                                                                                                                                                                                               |                                                                                                                                                                                                                                                                                                                                                                                                                                                                   |                                                                                                                                                                                                                                                                                                                                                                                                                                                                                                               |
| 52<br>53<br>54                                                                               | 5f. Start Date<br> _ _ / _ _ / _ _ _ _  (dd/mm/yyyy)                                                                                                                                                                                                                                                                                                                                                                                                                                                                                                                                                                                                                                                                                                                                                                                                                                                                                                                                                                                                                                                                                                                           |                                                                                                                                                                                                                                                                                                                                                                                                                                                                                                               |                                                                                                                                                                                                                                                                                                                                                                                                                                                                   |                                                                                                                                                                                                                                                                                                                                                                                                                                                                                                               |
| 55<br>56<br>57<br>58<br>59<br>60                                                             | 5g. Stop Date<br> _ _ / _ _ / _ _ _ _  (dd/mm/yyyy)<br><br><input type="checkbox"/> Treatment Ongoing (Return to update the status at next visit. Update stop date and reason once medication is stopped.)<br><input type="checkbox"/> Unknown                                                                                                                                                                                                                                                                                                                                                                                                                                                                                                                                                                                                                                                                                                                                                                                                                                                                                                                                 |                                                                                                                                                                                                                                                                                                                                                                                                                                                                                                               |                                                                                                                                                                                                                                                                                                                                                                                                                                                                   |                                                                                                                                                                                                                                                                                                                                                                                                                                                                                                               |

## IeDEA TB SRN

|                                                                                           |                                                         |                                                                                                                                                                                                                                                                                                                                                                                                                                                                                                                                                                                                                                                                                                                                   |                                                                                                                                                                                                                                                                                                                                                                                                                                                                                                               |
|-------------------------------------------------------------------------------------------|---------------------------------------------------------|-----------------------------------------------------------------------------------------------------------------------------------------------------------------------------------------------------------------------------------------------------------------------------------------------------------------------------------------------------------------------------------------------------------------------------------------------------------------------------------------------------------------------------------------------------------------------------------------------------------------------------------------------------------------------------------------------------------------------------------|---------------------------------------------------------------------------------------------------------------------------------------------------------------------------------------------------------------------------------------------------------------------------------------------------------------------------------------------------------------------------------------------------------------------------------------------------------------------------------------------------------------|
| 1<br>2<br>3<br>4<br>5<br>6<br>7<br>8<br>9<br>10<br>11<br>12<br>13<br>14<br>15<br>16<br>17 | 5h. Reason for change, interruption or completion       | <input type="checkbox"/> Completed intensive phase<br><input type="checkbox"/> Completed continuation phase<br><input type="checkbox"/> TB treatment failure<br><input type="checkbox"/> Drug resistance<br><input type="checkbox"/> Pregnancy<br><input type="checkbox"/> Side effects or toxicity<br><input type="checkbox"/> Incompatibility with ART (antiretroviral treatment)<br><input type="checkbox"/> Drug interaction<br><input type="checkbox"/> Participant stopped taking the meds<br><input type="checkbox"/> Lost to follow up<br><input type="checkbox"/> Dose adjustment (e.g. for weight change)<br><input type="checkbox"/> Death<br><input type="checkbox"/> Other _____<br><input type="checkbox"/> Unknown |                                                                                                                                                                                                                                                                                                                                                                                                                                                                                                               |
| 18<br>19                                                                                  | <b>TB Drug 6</b>                                        |                                                                                                                                                                                                                                                                                                                                                                                                                                                                                                                                                                                                                                                                                                                                   |                                                                                                                                                                                                                                                                                                                                                                                                                                                                                                               |
| 20<br>21<br>22<br>23<br>24<br>25<br>26<br>27<br>28<br>29<br>30<br>31<br>32<br>33<br>34    | 6. TB Drug 6<br>(Select one)                            | <input type="checkbox"/> RHZE<br><input type="checkbox"/> RH<br><input type="checkbox"/> Rifampicin<br><input type="checkbox"/> Pyrazinamide<br><input type="checkbox"/> Isoniazid<br><input type="checkbox"/> Ethambutol<br><input type="checkbox"/> Streptomycin<br><input type="checkbox"/> Rifabutin<br><input type="checkbox"/> Amikacin<br><input type="checkbox"/> Kanamycin<br><input type="checkbox"/> Capreomycin<br><input type="checkbox"/> Ofloxacin                                                                                                                                                                                                                                                                 | <input type="checkbox"/> Levofloxacin<br><input type="checkbox"/> Moxifloxacin<br><input type="checkbox"/> Terizidone<br><input type="checkbox"/> Cycloserine<br><input type="checkbox"/> Ethionamide<br><input type="checkbox"/> Protionamide<br><input type="checkbox"/> Para-aminosalicylic acid (PAS)<br><input type="checkbox"/> Clofazimine<br><input type="checkbox"/> Linezolid<br><input type="checkbox"/> Imipenem<br><input type="checkbox"/> Bedaquiline<br><input type="checkbox"/> Other: _____ |
| 35<br>36<br>37<br>38<br>39                                                                | 6a. If RHZE, combination:                               | <input type="checkbox"/> RHZE 150/75/400/275 - 2 tablets<br><input type="checkbox"/> RHZE 150/75/400/275 - 3 tablets<br><input type="checkbox"/> RHZE 150/75/400/275 - 4 tablets<br><input type="checkbox"/> RHZE 150/75/400/275 - 5 tablets                                                                                                                                                                                                                                                                                                                                                                                                                                                                                      |                                                                                                                                                                                                                                                                                                                                                                                                                                                                                                               |
| 40<br>41<br>42<br>43<br>44<br>45<br>46<br>47<br>48<br>49                                  | 6b. If RH, combination:                                 | <input type="checkbox"/> RH 150/75 - 2 tablets<br><input type="checkbox"/> RH 150/75 - 3 tablets<br><input type="checkbox"/> RH 150/75 - 4 tablets<br><input type="checkbox"/> RH 150/75 - 5 tablets<br><input type="checkbox"/> RH 300/200 - 1 tablet or capsule<br><input type="checkbox"/> RH 300/200 - 2 tablets or capsules<br><input type="checkbox"/> RH 300/200 - 1 tablet or capsule + RH 150/100 - 1 tablet<br><input type="checkbox"/> RH 300/200 - 2 tablets or capsules + RH 150/100 - 1 tablet                                                                                                                                                                                                                      |                                                                                                                                                                                                                                                                                                                                                                                                                                                                                                               |
| 50<br>51                                                                                  | 6c. Other drugs – Dose (mg)                             | _ _ _ _                                                                                                                                                                                                                                                                                                                                                                                                                                                                                                                                                                                                                                                                                                                           |                                                                                                                                                                                                                                                                                                                                                                                                                                                                                                               |
| 52<br>53<br>54<br>55                                                                      | 6d. How many times a day is this medication prescribed? | _ _ _                                                                                                                                                                                                                                                                                                                                                                                                                                                                                                                                                                                                                                                                                                                             |                                                                                                                                                                                                                                                                                                                                                                                                                                                                                                               |
| 56<br>57<br>58                                                                            | 6e. How many days a week is this medication prescribed? | _ _ _                                                                                                                                                                                                                                                                                                                                                                                                                                                                                                                                                                                                                                                                                                                             |                                                                                                                                                                                                                                                                                                                                                                                                                                                                                                               |
| 59<br>60                                                                                  | 6f. Start Date                                          | _ _ / _ _ / _ _ _ _  (dd/mm/yyyy)                                                                                                                                                                                                                                                                                                                                                                                                                                                                                                                                                                                                                                                                                                 |                                                                                                                                                                                                                                                                                                                                                                                                                                                                                                               |

**leDEA TB SRN**

|                                                                                                                                                                                                                                                                                                                                                                                                                                                                                                                      |                                                                                                                                                                                                                                                                                                                                                                                                                                                                                                                                                                                                                                                                                                                                                                                                                                                                                                                                                                                                                                                                                                                                                                                                               |  |                                                                                                                                                                                                                                                                                                                                                                                                                                                                                                                      |                                                                                                                                                                                                                                                                                                                                                                                                                                                                                                                                                                  |
|----------------------------------------------------------------------------------------------------------------------------------------------------------------------------------------------------------------------------------------------------------------------------------------------------------------------------------------------------------------------------------------------------------------------------------------------------------------------------------------------------------------------|---------------------------------------------------------------------------------------------------------------------------------------------------------------------------------------------------------------------------------------------------------------------------------------------------------------------------------------------------------------------------------------------------------------------------------------------------------------------------------------------------------------------------------------------------------------------------------------------------------------------------------------------------------------------------------------------------------------------------------------------------------------------------------------------------------------------------------------------------------------------------------------------------------------------------------------------------------------------------------------------------------------------------------------------------------------------------------------------------------------------------------------------------------------------------------------------------------------|--|----------------------------------------------------------------------------------------------------------------------------------------------------------------------------------------------------------------------------------------------------------------------------------------------------------------------------------------------------------------------------------------------------------------------------------------------------------------------------------------------------------------------|------------------------------------------------------------------------------------------------------------------------------------------------------------------------------------------------------------------------------------------------------------------------------------------------------------------------------------------------------------------------------------------------------------------------------------------------------------------------------------------------------------------------------------------------------------------|
| <p>1<br/>2<br/>3<br/>4<br/>5<br/>6<br/>7<br/>8</p> <p>6g. Stop Date</p>                                                                                                                                                                                                                                                                                                                                                                                                                                              | <p>____/____/____ (dd/mm/yyyy)</p> <p><input type="checkbox"/> Treatment Ongoing (<i>Return to update the status at next visit. Update stop date and reason once medication is stopped.</i>)</p> <p><input type="checkbox"/> Unknown</p>                                                                                                                                                                                                                                                                                                                                                                                                                                                                                                                                                                                                                                                                                                                                                                                                                                                                                                                                                                      |  |                                                                                                                                                                                                                                                                                                                                                                                                                                                                                                                      |                                                                                                                                                                                                                                                                                                                                                                                                                                                                                                                                                                  |
| <p>9<br/>10<br/>11<br/>12<br/>13<br/>14<br/>15<br/>16<br/>17<br/>18<br/>19<br/>20<br/>21<br/>22<br/>23<br/>24</p> <p>6h. Reason for change, interruption or completion</p>                                                                                                                                                                                                                                                                                                                                           | <p><input type="checkbox"/> Completed intensive phase</p> <p><input type="checkbox"/> Completed continuation phase</p> <p><input type="checkbox"/> TB treatment failure</p> <p><input type="checkbox"/> Drug resistance</p> <p><input type="checkbox"/> Pregnancy</p> <p><input type="checkbox"/> Side effects or toxicity</p> <p><input type="checkbox"/> Incompatibility with ART (antiretroviral treatment)</p> <p><input type="checkbox"/> Drug interaction</p> <p><input type="checkbox"/> Participant stopped taking the meds</p> <p><input type="checkbox"/> Lost to follow up</p> <p><input type="checkbox"/> Dose adjustment (e.g. for weight change)</p> <p><input type="checkbox"/> Death</p> <p><input type="checkbox"/> Other _____</p> <p><input type="checkbox"/> Unknown</p>                                                                                                                                                                                                                                                                                                                                                                                                                  |  |                                                                                                                                                                                                                                                                                                                                                                                                                                                                                                                      |                                                                                                                                                                                                                                                                                                                                                                                                                                                                                                                                                                  |
| <p>25<br/>26</p> <p><b>TB Drug 7</b></p>                                                                                                                                                                                                                                                                                                                                                                                                                                                                             |                                                                                                                                                                                                                                                                                                                                                                                                                                                                                                                                                                                                                                                                                                                                                                                                                                                                                                                                                                                                                                                                                                                                                                                                               |  |                                                                                                                                                                                                                                                                                                                                                                                                                                                                                                                      |                                                                                                                                                                                                                                                                                                                                                                                                                                                                                                                                                                  |
| <p>27<br/>28<br/>29<br/>30<br/>31<br/>32<br/>33<br/>34<br/>35<br/>36<br/>37<br/>38<br/>39<br/>40<br/>41<br/>42<br/>43<br/>44<br/>45<br/>46</p> <p>7. TB Drug 7<br/>(Select one)</p>                                                                                                                                                                                                                                                                                                                                  | <table border="1"> <tr> <td data-bbox="630 974 917 1422"> <p><input type="checkbox"/> RHZE</p> <p><input type="checkbox"/> RH</p> <p><input type="checkbox"/> Rifampicin</p> <p><input type="checkbox"/> Pyrazinamide</p> <p><input type="checkbox"/> Isoniazid</p> <p><input type="checkbox"/> Ethambutol</p> <p><input type="checkbox"/> Streptomycin</p> <p><input type="checkbox"/> Rifabutin</p> <p><input type="checkbox"/> Amikacin</p> <p><input type="checkbox"/> Kanamycin</p> <p><input type="checkbox"/> Capreomycin</p> <p><input type="checkbox"/> Ofloxacin</p> </td> <td data-bbox="917 974 1476 1422"> <p><input type="checkbox"/> Levofloxacin</p> <p><input type="checkbox"/> Moxifloxacin</p> <p><input type="checkbox"/> Terizidone</p> <p><input type="checkbox"/> Cycloserine</p> <p><input type="checkbox"/> Ethionamide</p> <p><input type="checkbox"/> Protionamide</p> <p><input type="checkbox"/> Para-aminosalicylic acid (PAS)</p> <p><input type="checkbox"/> Clofazimine</p> <p><input type="checkbox"/> Linezolid</p> <p><input type="checkbox"/> Imipenem</p> <p><input type="checkbox"/> Bedaquiline</p> <p><input type="checkbox"/> Other: _____</p> </td> </tr> </table> |  | <p><input type="checkbox"/> RHZE</p> <p><input type="checkbox"/> RH</p> <p><input type="checkbox"/> Rifampicin</p> <p><input type="checkbox"/> Pyrazinamide</p> <p><input type="checkbox"/> Isoniazid</p> <p><input type="checkbox"/> Ethambutol</p> <p><input type="checkbox"/> Streptomycin</p> <p><input type="checkbox"/> Rifabutin</p> <p><input type="checkbox"/> Amikacin</p> <p><input type="checkbox"/> Kanamycin</p> <p><input type="checkbox"/> Capreomycin</p> <p><input type="checkbox"/> Ofloxacin</p> | <p><input type="checkbox"/> Levofloxacin</p> <p><input type="checkbox"/> Moxifloxacin</p> <p><input type="checkbox"/> Terizidone</p> <p><input type="checkbox"/> Cycloserine</p> <p><input type="checkbox"/> Ethionamide</p> <p><input type="checkbox"/> Protionamide</p> <p><input type="checkbox"/> Para-aminosalicylic acid (PAS)</p> <p><input type="checkbox"/> Clofazimine</p> <p><input type="checkbox"/> Linezolid</p> <p><input type="checkbox"/> Imipenem</p> <p><input type="checkbox"/> Bedaquiline</p> <p><input type="checkbox"/> Other: _____</p> |
| <p><input type="checkbox"/> RHZE</p> <p><input type="checkbox"/> RH</p> <p><input type="checkbox"/> Rifampicin</p> <p><input type="checkbox"/> Pyrazinamide</p> <p><input type="checkbox"/> Isoniazid</p> <p><input type="checkbox"/> Ethambutol</p> <p><input type="checkbox"/> Streptomycin</p> <p><input type="checkbox"/> Rifabutin</p> <p><input type="checkbox"/> Amikacin</p> <p><input type="checkbox"/> Kanamycin</p> <p><input type="checkbox"/> Capreomycin</p> <p><input type="checkbox"/> Ofloxacin</p> | <p><input type="checkbox"/> Levofloxacin</p> <p><input type="checkbox"/> Moxifloxacin</p> <p><input type="checkbox"/> Terizidone</p> <p><input type="checkbox"/> Cycloserine</p> <p><input type="checkbox"/> Ethionamide</p> <p><input type="checkbox"/> Protionamide</p> <p><input type="checkbox"/> Para-aminosalicylic acid (PAS)</p> <p><input type="checkbox"/> Clofazimine</p> <p><input type="checkbox"/> Linezolid</p> <p><input type="checkbox"/> Imipenem</p> <p><input type="checkbox"/> Bedaquiline</p> <p><input type="checkbox"/> Other: _____</p>                                                                                                                                                                                                                                                                                                                                                                                                                                                                                                                                                                                                                                              |  |                                                                                                                                                                                                                                                                                                                                                                                                                                                                                                                      |                                                                                                                                                                                                                                                                                                                                                                                                                                                                                                                                                                  |
| <p>47<br/>48<br/>49<br/>50<br/>51</p> <p>7a. If RHZE, combination:</p>                                                                                                                                                                                                                                                                                                                                                                                                                                               | <p><input type="checkbox"/> RHZE 150/75/400/275 - 2 tablets</p> <p><input type="checkbox"/> RHZE 150/75/400/275 - 3 tablets</p> <p><input type="checkbox"/> RHZE 150/75/400/275 - 4 tablets</p> <p><input type="checkbox"/> RHZE 150/75/400/275 - 5 tablets</p>                                                                                                                                                                                                                                                                                                                                                                                                                                                                                                                                                                                                                                                                                                                                                                                                                                                                                                                                               |  |                                                                                                                                                                                                                                                                                                                                                                                                                                                                                                                      |                                                                                                                                                                                                                                                                                                                                                                                                                                                                                                                                                                  |
| <p>52<br/>53<br/>54<br/>55<br/>56<br/>57<br/>58<br/>59<br/>60</p> <p>7b. If RH, combination:</p>                                                                                                                                                                                                                                                                                                                                                                                                                     | <p><input type="checkbox"/> RH 150/75 - 2 tablets</p> <p><input type="checkbox"/> RH 150/75 - 3 tablets</p> <p><input type="checkbox"/> RH 150/75 - 4 tablets</p> <p><input type="checkbox"/> RH 150/75 - 5 tablets</p> <p><input type="checkbox"/> RH 300/200 - 1 tablet or capsule</p> <p><input type="checkbox"/> RH 300/200 - 2 tablets or capsules</p> <p><input type="checkbox"/> RH 300/200 - 1 tablet or capsule + RH 150/100 - 1 tablet</p> <p><input type="checkbox"/> RH 300/200 - 2 tablets or capsules + RH 150/100 - 1 tablet</p>                                                                                                                                                                                                                                                                                                                                                                                                                                                                                                                                                                                                                                                               |  |                                                                                                                                                                                                                                                                                                                                                                                                                                                                                                                      |                                                                                                                                                                                                                                                                                                                                                                                                                                                                                                                                                                  |



|                                                                                                    |                                                         |                                                                                                                                                                                                                                                                                                                                                                                                                                                                                                                                                                                                                                                                                                                                                                                                                                                                                                                                                                                                                                                                                                                                                                                                                                                                                                       |                               |                                       |                             |                                       |                                     |                                     |                                       |                                      |                                    |                                      |                                     |                                       |                                       |                                                         |                                    |                                      |                                   |                                    |                                    |                                   |                                      |                                      |                                    |                                       |
|----------------------------------------------------------------------------------------------------|---------------------------------------------------------|-------------------------------------------------------------------------------------------------------------------------------------------------------------------------------------------------------------------------------------------------------------------------------------------------------------------------------------------------------------------------------------------------------------------------------------------------------------------------------------------------------------------------------------------------------------------------------------------------------------------------------------------------------------------------------------------------------------------------------------------------------------------------------------------------------------------------------------------------------------------------------------------------------------------------------------------------------------------------------------------------------------------------------------------------------------------------------------------------------------------------------------------------------------------------------------------------------------------------------------------------------------------------------------------------------|-------------------------------|---------------------------------------|-----------------------------|---------------------------------------|-------------------------------------|-------------------------------------|---------------------------------------|--------------------------------------|------------------------------------|--------------------------------------|-------------------------------------|---------------------------------------|---------------------------------------|---------------------------------------------------------|------------------------------------|--------------------------------------|-----------------------------------|------------------------------------|------------------------------------|-----------------------------------|--------------------------------------|--------------------------------------|------------------------------------|---------------------------------------|
| 1<br>2<br>3                                                                                        | 7c. Other drugs - Dose (mg)                             | _ _ _ _                                                                                                                                                                                                                                                                                                                                                                                                                                                                                                                                                                                                                                                                                                                                                                                                                                                                                                                                                                                                                                                                                                                                                                                                                                                                                               |                               |                                       |                             |                                       |                                     |                                     |                                       |                                      |                                    |                                      |                                     |                                       |                                       |                                                         |                                    |                                      |                                   |                                    |                                    |                                   |                                      |                                      |                                    |                                       |
| 4<br>5<br>6                                                                                        | 7d. How many times a day is this medication prescribed? | _ _ _                                                                                                                                                                                                                                                                                                                                                                                                                                                                                                                                                                                                                                                                                                                                                                                                                                                                                                                                                                                                                                                                                                                                                                                                                                                                                                 |                               |                                       |                             |                                       |                                     |                                     |                                       |                                      |                                    |                                      |                                     |                                       |                                       |                                                         |                                    |                                      |                                   |                                    |                                    |                                   |                                      |                                      |                                    |                                       |
| 7<br>8<br>9                                                                                        | 7e. How many days a week is this medication prescribed? | _ _ _                                                                                                                                                                                                                                                                                                                                                                                                                                                                                                                                                                                                                                                                                                                                                                                                                                                                                                                                                                                                                                                                                                                                                                                                                                                                                                 |                               |                                       |                             |                                       |                                     |                                     |                                       |                                      |                                    |                                      |                                     |                                       |                                       |                                                         |                                    |                                      |                                   |                                    |                                    |                                   |                                      |                                      |                                    |                                       |
| 10<br>11<br>12                                                                                     | 7f. Start Date                                          | _ _ / _ _ / _ _ _ _  (dd/mm/yyyy)                                                                                                                                                                                                                                                                                                                                                                                                                                                                                                                                                                                                                                                                                                                                                                                                                                                                                                                                                                                                                                                                                                                                                                                                                                                                     |                               |                                       |                             |                                       |                                     |                                     |                                       |                                      |                                    |                                      |                                     |                                       |                                       |                                                         |                                    |                                      |                                   |                                    |                                    |                                   |                                      |                                      |                                    |                                       |
| 13<br>14<br>15<br>16<br>17<br>18<br>19                                                             | 7g. Stop Date                                           | _ _ / _ _ / _ _ _ _  (dd/mm/yyyy)<br><input type="checkbox"/> Treatment Ongoing ( <i>Return to update the status at next visit. Update stop date and reason once medication is stopped.</i> )<br><input type="checkbox"/> Unknown                                                                                                                                                                                                                                                                                                                                                                                                                                                                                                                                                                                                                                                                                                                                                                                                                                                                                                                                                                                                                                                                     |                               |                                       |                             |                                       |                                     |                                     |                                       |                                      |                                    |                                      |                                     |                                       |                                       |                                                         |                                    |                                      |                                   |                                    |                                    |                                   |                                      |                                      |                                    |                                       |
| 20<br>21<br>22<br>23<br>24<br>25<br>26<br>27<br>28<br>29<br>30<br>31<br>32<br>33<br>34<br>35<br>36 | 7h. Reason for change, interruption or completion       | <input type="checkbox"/> Completed intensive phase<br><input type="checkbox"/> Completed continuation phase<br><input type="checkbox"/> TB treatment failure<br><input type="checkbox"/> Drug resistance<br><input type="checkbox"/> Pregnancy<br><input type="checkbox"/> Side effects or toxicity<br><input type="checkbox"/> Incompatibility with ART (antiretroviral treatment)<br><input type="checkbox"/> Drug interaction<br><input type="checkbox"/> Participant stopped taking the meds<br><input type="checkbox"/> Lost to follow up<br><input type="checkbox"/> Dose adjustment (e.g. for weight change)<br><input type="checkbox"/> Death<br><input type="checkbox"/> Other _____<br><input type="checkbox"/> Unknown                                                                                                                                                                                                                                                                                                                                                                                                                                                                                                                                                                     |                               |                                       |                             |                                       |                                     |                                     |                                       |                                      |                                    |                                      |                                     |                                       |                                       |                                                         |                                    |                                      |                                   |                                    |                                    |                                   |                                      |                                      |                                    |                                       |
| 37                                                                                                 | <b>TB Drug 8</b>                                        |                                                                                                                                                                                                                                                                                                                                                                                                                                                                                                                                                                                                                                                                                                                                                                                                                                                                                                                                                                                                                                                                                                                                                                                                                                                                                                       |                               |                                       |                             |                                       |                                     |                                     |                                       |                                      |                                    |                                      |                                     |                                       |                                       |                                                         |                                    |                                      |                                   |                                    |                                    |                                   |                                      |                                      |                                    |                                       |
| 38<br>39<br>40<br>41<br>42<br>43<br>44<br>45<br>46<br>47<br>48<br>49<br>50<br>51<br>52<br>53       | 8. TB Drug 8<br>( <i>Select one</i> )                   | <table border="1"> <tr> <td><input type="checkbox"/> RHZE</td> <td><input type="checkbox"/> Levofloxacin</td> </tr> <tr> <td><input type="checkbox"/> RH</td> <td><input type="checkbox"/> Moxifloxacin</td> </tr> <tr> <td><input type="checkbox"/> Rifampicin</td> <td><input type="checkbox"/> Terizidone</td> </tr> <tr> <td><input type="checkbox"/> Pyrazinamide</td> <td><input type="checkbox"/> Cycloserine</td> </tr> <tr> <td><input type="checkbox"/> Isoniazid</td> <td><input type="checkbox"/> Ethionamide</td> </tr> <tr> <td><input type="checkbox"/> Ethambutol</td> <td><input type="checkbox"/> Protionamide</td> </tr> <tr> <td><input type="checkbox"/> Streptomycin</td> <td><input type="checkbox"/> Para-aminosalicylic acid (PAS)</td> </tr> <tr> <td><input type="checkbox"/> Rifabutin</td> <td><input type="checkbox"/> Clofazimine</td> </tr> <tr> <td><input type="checkbox"/> Amikacin</td> <td><input type="checkbox"/> Linezolid</td> </tr> <tr> <td><input type="checkbox"/> Kanamycin</td> <td><input type="checkbox"/> Imipenem</td> </tr> <tr> <td><input type="checkbox"/> Capreomycin</td> <td><input type="checkbox"/> Bedaquiline</td> </tr> <tr> <td><input type="checkbox"/> Ofloxacin</td> <td><input type="checkbox"/> Other: _____</td> </tr> </table> | <input type="checkbox"/> RHZE | <input type="checkbox"/> Levofloxacin | <input type="checkbox"/> RH | <input type="checkbox"/> Moxifloxacin | <input type="checkbox"/> Rifampicin | <input type="checkbox"/> Terizidone | <input type="checkbox"/> Pyrazinamide | <input type="checkbox"/> Cycloserine | <input type="checkbox"/> Isoniazid | <input type="checkbox"/> Ethionamide | <input type="checkbox"/> Ethambutol | <input type="checkbox"/> Protionamide | <input type="checkbox"/> Streptomycin | <input type="checkbox"/> Para-aminosalicylic acid (PAS) | <input type="checkbox"/> Rifabutin | <input type="checkbox"/> Clofazimine | <input type="checkbox"/> Amikacin | <input type="checkbox"/> Linezolid | <input type="checkbox"/> Kanamycin | <input type="checkbox"/> Imipenem | <input type="checkbox"/> Capreomycin | <input type="checkbox"/> Bedaquiline | <input type="checkbox"/> Ofloxacin | <input type="checkbox"/> Other: _____ |
| <input type="checkbox"/> RHZE                                                                      | <input type="checkbox"/> Levofloxacin                   |                                                                                                                                                                                                                                                                                                                                                                                                                                                                                                                                                                                                                                                                                                                                                                                                                                                                                                                                                                                                                                                                                                                                                                                                                                                                                                       |                               |                                       |                             |                                       |                                     |                                     |                                       |                                      |                                    |                                      |                                     |                                       |                                       |                                                         |                                    |                                      |                                   |                                    |                                    |                                   |                                      |                                      |                                    |                                       |
| <input type="checkbox"/> RH                                                                        | <input type="checkbox"/> Moxifloxacin                   |                                                                                                                                                                                                                                                                                                                                                                                                                                                                                                                                                                                                                                                                                                                                                                                                                                                                                                                                                                                                                                                                                                                                                                                                                                                                                                       |                               |                                       |                             |                                       |                                     |                                     |                                       |                                      |                                    |                                      |                                     |                                       |                                       |                                                         |                                    |                                      |                                   |                                    |                                    |                                   |                                      |                                      |                                    |                                       |
| <input type="checkbox"/> Rifampicin                                                                | <input type="checkbox"/> Terizidone                     |                                                                                                                                                                                                                                                                                                                                                                                                                                                                                                                                                                                                                                                                                                                                                                                                                                                                                                                                                                                                                                                                                                                                                                                                                                                                                                       |                               |                                       |                             |                                       |                                     |                                     |                                       |                                      |                                    |                                      |                                     |                                       |                                       |                                                         |                                    |                                      |                                   |                                    |                                    |                                   |                                      |                                      |                                    |                                       |
| <input type="checkbox"/> Pyrazinamide                                                              | <input type="checkbox"/> Cycloserine                    |                                                                                                                                                                                                                                                                                                                                                                                                                                                                                                                                                                                                                                                                                                                                                                                                                                                                                                                                                                                                                                                                                                                                                                                                                                                                                                       |                               |                                       |                             |                                       |                                     |                                     |                                       |                                      |                                    |                                      |                                     |                                       |                                       |                                                         |                                    |                                      |                                   |                                    |                                    |                                   |                                      |                                      |                                    |                                       |
| <input type="checkbox"/> Isoniazid                                                                 | <input type="checkbox"/> Ethionamide                    |                                                                                                                                                                                                                                                                                                                                                                                                                                                                                                                                                                                                                                                                                                                                                                                                                                                                                                                                                                                                                                                                                                                                                                                                                                                                                                       |                               |                                       |                             |                                       |                                     |                                     |                                       |                                      |                                    |                                      |                                     |                                       |                                       |                                                         |                                    |                                      |                                   |                                    |                                    |                                   |                                      |                                      |                                    |                                       |
| <input type="checkbox"/> Ethambutol                                                                | <input type="checkbox"/> Protionamide                   |                                                                                                                                                                                                                                                                                                                                                                                                                                                                                                                                                                                                                                                                                                                                                                                                                                                                                                                                                                                                                                                                                                                                                                                                                                                                                                       |                               |                                       |                             |                                       |                                     |                                     |                                       |                                      |                                    |                                      |                                     |                                       |                                       |                                                         |                                    |                                      |                                   |                                    |                                    |                                   |                                      |                                      |                                    |                                       |
| <input type="checkbox"/> Streptomycin                                                              | <input type="checkbox"/> Para-aminosalicylic acid (PAS) |                                                                                                                                                                                                                                                                                                                                                                                                                                                                                                                                                                                                                                                                                                                                                                                                                                                                                                                                                                                                                                                                                                                                                                                                                                                                                                       |                               |                                       |                             |                                       |                                     |                                     |                                       |                                      |                                    |                                      |                                     |                                       |                                       |                                                         |                                    |                                      |                                   |                                    |                                    |                                   |                                      |                                      |                                    |                                       |
| <input type="checkbox"/> Rifabutin                                                                 | <input type="checkbox"/> Clofazimine                    |                                                                                                                                                                                                                                                                                                                                                                                                                                                                                                                                                                                                                                                                                                                                                                                                                                                                                                                                                                                                                                                                                                                                                                                                                                                                                                       |                               |                                       |                             |                                       |                                     |                                     |                                       |                                      |                                    |                                      |                                     |                                       |                                       |                                                         |                                    |                                      |                                   |                                    |                                    |                                   |                                      |                                      |                                    |                                       |
| <input type="checkbox"/> Amikacin                                                                  | <input type="checkbox"/> Linezolid                      |                                                                                                                                                                                                                                                                                                                                                                                                                                                                                                                                                                                                                                                                                                                                                                                                                                                                                                                                                                                                                                                                                                                                                                                                                                                                                                       |                               |                                       |                             |                                       |                                     |                                     |                                       |                                      |                                    |                                      |                                     |                                       |                                       |                                                         |                                    |                                      |                                   |                                    |                                    |                                   |                                      |                                      |                                    |                                       |
| <input type="checkbox"/> Kanamycin                                                                 | <input type="checkbox"/> Imipenem                       |                                                                                                                                                                                                                                                                                                                                                                                                                                                                                                                                                                                                                                                                                                                                                                                                                                                                                                                                                                                                                                                                                                                                                                                                                                                                                                       |                               |                                       |                             |                                       |                                     |                                     |                                       |                                      |                                    |                                      |                                     |                                       |                                       |                                                         |                                    |                                      |                                   |                                    |                                    |                                   |                                      |                                      |                                    |                                       |
| <input type="checkbox"/> Capreomycin                                                               | <input type="checkbox"/> Bedaquiline                    |                                                                                                                                                                                                                                                                                                                                                                                                                                                                                                                                                                                                                                                                                                                                                                                                                                                                                                                                                                                                                                                                                                                                                                                                                                                                                                       |                               |                                       |                             |                                       |                                     |                                     |                                       |                                      |                                    |                                      |                                     |                                       |                                       |                                                         |                                    |                                      |                                   |                                    |                                    |                                   |                                      |                                      |                                    |                                       |
| <input type="checkbox"/> Ofloxacin                                                                 | <input type="checkbox"/> Other: _____                   |                                                                                                                                                                                                                                                                                                                                                                                                                                                                                                                                                                                                                                                                                                                                                                                                                                                                                                                                                                                                                                                                                                                                                                                                                                                                                                       |                               |                                       |                             |                                       |                                     |                                     |                                       |                                      |                                    |                                      |                                     |                                       |                                       |                                                         |                                    |                                      |                                   |                                    |                                    |                                   |                                      |                                      |                                    |                                       |
| 54<br>55<br>56<br>57<br>58                                                                         | 8a. If RHZE, combination:                               | <input type="checkbox"/> RHZE 150/75/400/275 - 2 tablets<br><input type="checkbox"/> RHZE 150/75/400/275 - 3 tablets<br><input type="checkbox"/> RHZE 150/75/400/275 - 4 tablets<br><input type="checkbox"/> RHZE 150/75/400/275 - 5 tablets                                                                                                                                                                                                                                                                                                                                                                                                                                                                                                                                                                                                                                                                                                                                                                                                                                                                                                                                                                                                                                                          |                               |                                       |                             |                                       |                                     |                                     |                                       |                                      |                                    |                                      |                                     |                                       |                                       |                                                         |                                    |                                      |                                   |                                    |                                    |                                   |                                      |                                      |                                    |                                       |
| 59<br>60                                                                                           | 8b. If RH, combination:                                 | <input type="checkbox"/> RH 150/75 - 2 tablets<br><input type="checkbox"/> RH 150/75 - 3 tablets                                                                                                                                                                                                                                                                                                                                                                                                                                                                                                                                                                                                                                                                                                                                                                                                                                                                                                                                                                                                                                                                                                                                                                                                      |                               |                                       |                             |                                       |                                     |                                     |                                       |                                      |                                    |                                      |                                     |                                       |                                       |                                                         |                                    |                                      |                                   |                                    |                                    |                                   |                                      |                                      |                                    |                                       |

**leDEA TB SRN**

|                                                         |                                                                                                                                                                                                                                                                                                                                                                                                                                                                                                                                                                                                                                                                                                                                   |
|---------------------------------------------------------|-----------------------------------------------------------------------------------------------------------------------------------------------------------------------------------------------------------------------------------------------------------------------------------------------------------------------------------------------------------------------------------------------------------------------------------------------------------------------------------------------------------------------------------------------------------------------------------------------------------------------------------------------------------------------------------------------------------------------------------|
|                                                         | <input type="checkbox"/> RH 150/75 - 4 tablets<br><input type="checkbox"/> RH 150/75 - 5 tablets<br><input type="checkbox"/> RH 300/200 - 1 tablet or capsule<br><input type="checkbox"/> RH 300/200 - 2 tablets or capsules<br><input type="checkbox"/> RH 300/200 - 1 tablet or capsule + RH 150/100 - 1 tablet<br><input type="checkbox"/> RH 300/200 - 2 tablets or capsules + RH 150/100 - 1 tablet                                                                                                                                                                                                                                                                                                                          |
| 8c. Other drugs - Dose (mg)                             | _ _ _ _                                                                                                                                                                                                                                                                                                                                                                                                                                                                                                                                                                                                                                                                                                                           |
| 8d. How many times a day is this medication prescribed? | _ _ _                                                                                                                                                                                                                                                                                                                                                                                                                                                                                                                                                                                                                                                                                                                             |
| 8e. How many days a week is this medication prescribed? | _ _ _                                                                                                                                                                                                                                                                                                                                                                                                                                                                                                                                                                                                                                                                                                                             |
| 8f. Start Date                                          | _ _ / _ _ / _ _ _ _  (dd/mm/yyyy)                                                                                                                                                                                                                                                                                                                                                                                                                                                                                                                                                                                                                                                                                                 |
| 8g. Stop Date                                           | _ _ / _ _ / _ _ _ _  (dd/mm/yyyy)<br><input type="checkbox"/> Treatment Ongoing ( <i>Return to update the status at next visit. Update stop date and reason once medication is stopped.</i> )<br><input type="checkbox"/> Unknown                                                                                                                                                                                                                                                                                                                                                                                                                                                                                                 |
| 8h. Reason for change, interruption or completion       | <input type="checkbox"/> Completed intensive phase<br><input type="checkbox"/> Completed continuation phase<br><input type="checkbox"/> TB treatment failure<br><input type="checkbox"/> Drug resistance<br><input type="checkbox"/> Pregnancy<br><input type="checkbox"/> Side effects or toxicity<br><input type="checkbox"/> Incompatibility with ART (antiretroviral treatment)<br><input type="checkbox"/> Drug interaction<br><input type="checkbox"/> Participant stopped taking the meds<br><input type="checkbox"/> Lost to follow up<br><input type="checkbox"/> Dose adjustment (e.g. for weight change)<br><input type="checkbox"/> Death<br><input type="checkbox"/> Other _____<br><input type="checkbox"/> Unknown |
| <b>TB Drug 9</b>                                        |                                                                                                                                                                                                                                                                                                                                                                                                                                                                                                                                                                                                                                                                                                                                   |

## IeDEA TB SRN

|                                                                                                                                                                                                                                                                                                                                                                                                                                                                   |                                                                                                                                                                                                                                                                                                                                                                                                                                                                                                                                                                                                                                                                                                                                                                                                                                                                                                                                                                                                                                                                                                                                                   |                                                                                                                                                                                                                                                                                                                                                                                                                                                                   |                                                                                                                                                                                                                                                                                                                                                                                                                                                                                                               |
|-------------------------------------------------------------------------------------------------------------------------------------------------------------------------------------------------------------------------------------------------------------------------------------------------------------------------------------------------------------------------------------------------------------------------------------------------------------------|---------------------------------------------------------------------------------------------------------------------------------------------------------------------------------------------------------------------------------------------------------------------------------------------------------------------------------------------------------------------------------------------------------------------------------------------------------------------------------------------------------------------------------------------------------------------------------------------------------------------------------------------------------------------------------------------------------------------------------------------------------------------------------------------------------------------------------------------------------------------------------------------------------------------------------------------------------------------------------------------------------------------------------------------------------------------------------------------------------------------------------------------------|-------------------------------------------------------------------------------------------------------------------------------------------------------------------------------------------------------------------------------------------------------------------------------------------------------------------------------------------------------------------------------------------------------------------------------------------------------------------|---------------------------------------------------------------------------------------------------------------------------------------------------------------------------------------------------------------------------------------------------------------------------------------------------------------------------------------------------------------------------------------------------------------------------------------------------------------------------------------------------------------|
| <p>1<br/>2<br/>3<br/>4<br/>5<br/>6<br/>7<br/>8<br/>9<br/>10<br/>11<br/>12<br/>13<br/>14<br/>15<br/>16<br/>17<br/>18<br/>19<br/>20</p> <p>9. TB Drug 9<br/>(Select one)</p>                                                                                                                                                                                                                                                                                        | <table border="1"> <tr> <td data-bbox="624 147 922 600"> <input type="checkbox"/> RHZE<br/> <input type="checkbox"/> RH<br/> <input type="checkbox"/> Rifampicin<br/> <input type="checkbox"/> Pyrazinamide<br/> <input type="checkbox"/> Isoniazid<br/> <input type="checkbox"/> Ethambutol<br/> <input type="checkbox"/> Streptomycin<br/> <input type="checkbox"/> Rifabutin<br/> <input type="checkbox"/> Amikacin<br/> <input type="checkbox"/> Kanamycin<br/> <input type="checkbox"/> Capreomycin<br/> <input type="checkbox"/> Ofloxacin </td> <td data-bbox="922 147 1471 600"> <input type="checkbox"/> Levofloxacin<br/> <input type="checkbox"/> Moxifloxacin<br/> <input type="checkbox"/> Terizidone<br/> <input type="checkbox"/> Cycloserine<br/> <input type="checkbox"/> Ethionamide<br/> <input type="checkbox"/> Protionamide<br/> <input type="checkbox"/> Para-aminosalicylic acid (PAS)<br/> <input type="checkbox"/> Clofazimine<br/> <input type="checkbox"/> Linezolid<br/> <input type="checkbox"/> Imipenem<br/> <input type="checkbox"/> Bedaquiline<br/> <input type="checkbox"/> Other: _____ </td> </tr> </table> | <input type="checkbox"/> RHZE<br><input type="checkbox"/> RH<br><input type="checkbox"/> Rifampicin<br><input type="checkbox"/> Pyrazinamide<br><input type="checkbox"/> Isoniazid<br><input type="checkbox"/> Ethambutol<br><input type="checkbox"/> Streptomycin<br><input type="checkbox"/> Rifabutin<br><input type="checkbox"/> Amikacin<br><input type="checkbox"/> Kanamycin<br><input type="checkbox"/> Capreomycin<br><input type="checkbox"/> Ofloxacin | <input type="checkbox"/> Levofloxacin<br><input type="checkbox"/> Moxifloxacin<br><input type="checkbox"/> Terizidone<br><input type="checkbox"/> Cycloserine<br><input type="checkbox"/> Ethionamide<br><input type="checkbox"/> Protionamide<br><input type="checkbox"/> Para-aminosalicylic acid (PAS)<br><input type="checkbox"/> Clofazimine<br><input type="checkbox"/> Linezolid<br><input type="checkbox"/> Imipenem<br><input type="checkbox"/> Bedaquiline<br><input type="checkbox"/> Other: _____ |
| <input type="checkbox"/> RHZE<br><input type="checkbox"/> RH<br><input type="checkbox"/> Rifampicin<br><input type="checkbox"/> Pyrazinamide<br><input type="checkbox"/> Isoniazid<br><input type="checkbox"/> Ethambutol<br><input type="checkbox"/> Streptomycin<br><input type="checkbox"/> Rifabutin<br><input type="checkbox"/> Amikacin<br><input type="checkbox"/> Kanamycin<br><input type="checkbox"/> Capreomycin<br><input type="checkbox"/> Ofloxacin | <input type="checkbox"/> Levofloxacin<br><input type="checkbox"/> Moxifloxacin<br><input type="checkbox"/> Terizidone<br><input type="checkbox"/> Cycloserine<br><input type="checkbox"/> Ethionamide<br><input type="checkbox"/> Protionamide<br><input type="checkbox"/> Para-aminosalicylic acid (PAS)<br><input type="checkbox"/> Clofazimine<br><input type="checkbox"/> Linezolid<br><input type="checkbox"/> Imipenem<br><input type="checkbox"/> Bedaquiline<br><input type="checkbox"/> Other: _____                                                                                                                                                                                                                                                                                                                                                                                                                                                                                                                                                                                                                                     |                                                                                                                                                                                                                                                                                                                                                                                                                                                                   |                                                                                                                                                                                                                                                                                                                                                                                                                                                                                                               |
| <p>21<br/>22<br/>23<br/>24<br/>25<br/>26</p> <p>9a. If RHZE, combination:</p>                                                                                                                                                                                                                                                                                                                                                                                     | <input type="checkbox"/> RHZE 150/75/400/275 - 2 tablets<br><input type="checkbox"/> RHZE 150/75/400/275 - 3 tablets<br><input type="checkbox"/> RHZE 150/75/400/275 - 4 tablets<br><input type="checkbox"/> RHZE 150/75/400/275 - 5 tablets                                                                                                                                                                                                                                                                                                                                                                                                                                                                                                                                                                                                                                                                                                                                                                                                                                                                                                      |                                                                                                                                                                                                                                                                                                                                                                                                                                                                   |                                                                                                                                                                                                                                                                                                                                                                                                                                                                                                               |
| <p>27<br/>28<br/>29<br/>30<br/>31<br/>32<br/>33<br/>34<br/>35</p> <p>9b. If RH, combination:</p>                                                                                                                                                                                                                                                                                                                                                                  | <input type="checkbox"/> RH 150/75 - 2 tablets<br><input type="checkbox"/> RH 150/75 - 3 tablets<br><input type="checkbox"/> RH 150/75 - 4 tablets<br><input type="checkbox"/> RH 150/75 - 5 tablets<br><input type="checkbox"/> RH 300/200 - 1 tablet or capsule<br><input type="checkbox"/> RH 300/200 - 2 tablets or capsules<br><input type="checkbox"/> RH 300/200 - 1 tablet or capsule + RH 150/100 - 1 tablet<br><input type="checkbox"/> RH 300/200 - 2 tablets or capsules + RH 150/100 - 1 tablet                                                                                                                                                                                                                                                                                                                                                                                                                                                                                                                                                                                                                                      |                                                                                                                                                                                                                                                                                                                                                                                                                                                                   |                                                                                                                                                                                                                                                                                                                                                                                                                                                                                                               |
| <p>36<br/>37</p> <p>9c. Other drugs - Dose (mg)</p>                                                                                                                                                                                                                                                                                                                                                                                                               | _ _ _ _ _                                                                                                                                                                                                                                                                                                                                                                                                                                                                                                                                                                                                                                                                                                                                                                                                                                                                                                                                                                                                                                                                                                                                         |                                                                                                                                                                                                                                                                                                                                                                                                                                                                   |                                                                                                                                                                                                                                                                                                                                                                                                                                                                                                               |
| <p>38<br/>39<br/>40<br/>41</p> <p>9d. How many times a day is this medication prescribed?</p>                                                                                                                                                                                                                                                                                                                                                                     | _ _ _ _                                                                                                                                                                                                                                                                                                                                                                                                                                                                                                                                                                                                                                                                                                                                                                                                                                                                                                                                                                                                                                                                                                                                           |                                                                                                                                                                                                                                                                                                                                                                                                                                                                   |                                                                                                                                                                                                                                                                                                                                                                                                                                                                                                               |
| <p>42<br/>43<br/>44</p> <p>9e. How many days a week is this medication prescribed?</p>                                                                                                                                                                                                                                                                                                                                                                            | _ _ _ _                                                                                                                                                                                                                                                                                                                                                                                                                                                                                                                                                                                                                                                                                                                                                                                                                                                                                                                                                                                                                                                                                                                                           |                                                                                                                                                                                                                                                                                                                                                                                                                                                                   |                                                                                                                                                                                                                                                                                                                                                                                                                                                                                                               |
| <p>45<br/>46</p> <p>9f. Start Date</p>                                                                                                                                                                                                                                                                                                                                                                                                                            | _ _ _ / _ _ _ / _ _ _ _ _  (dd/mm/yyyy)                                                                                                                                                                                                                                                                                                                                                                                                                                                                                                                                                                                                                                                                                                                                                                                                                                                                                                                                                                                                                                                                                                           |                                                                                                                                                                                                                                                                                                                                                                                                                                                                   |                                                                                                                                                                                                                                                                                                                                                                                                                                                                                                               |
| <p>47<br/>48<br/>49<br/>50<br/>51<br/>52<br/>53</p> <p>9g. Stop Date</p>                                                                                                                                                                                                                                                                                                                                                                                          | _ _ _ / _ _ _ / _ _ _ _ _  (dd/mm/yyyy)<br><br><input type="checkbox"/> Treatment Ongoing (Return to update the status at next visit. Update stop date and reason once medication is stopped.)<br><input type="checkbox"/> Unknown                                                                                                                                                                                                                                                                                                                                                                                                                                                                                                                                                                                                                                                                                                                                                                                                                                                                                                                |                                                                                                                                                                                                                                                                                                                                                                                                                                                                   |                                                                                                                                                                                                                                                                                                                                                                                                                                                                                                               |
| <p>54<br/>55<br/>56<br/>57<br/>58<br/>59<br/>60</p> <p>9h. Reason for change, interruption or completion</p>                                                                                                                                                                                                                                                                                                                                                      | <input type="checkbox"/> Completed intensive phase<br><input type="checkbox"/> Completed continuation phase<br><input type="checkbox"/> TB treatment failure<br><input type="checkbox"/> Drug resistance<br><input type="checkbox"/> Pregnancy<br><input type="checkbox"/> Side effects or toxicity<br><input type="checkbox"/> Incompatibility with ART (antiretroviral treatment)                                                                                                                                                                                                                                                                                                                                                                                                                                                                                                                                                                                                                                                                                                                                                               |                                                                                                                                                                                                                                                                                                                                                                                                                                                                   |                                                                                                                                                                                                                                                                                                                                                                                                                                                                                                               |

**leDEA TB SRN**

|                                                                                                                                                                                                                                                                                                                                                                                                                                                                   |                                                                                                                                                                                                                                                                                                                                                                                                                                                                                                                                                                                                                                                                                                                                                                                                                                                                                                                                                                                                                                                                                                                                                                                                                                                                                |                                                                                                                                                                                                                                                                                                                                                                                                                                                                   |                                                                                                                                                                                                                                                                                                                                                                                                                                                                                                                |
|-------------------------------------------------------------------------------------------------------------------------------------------------------------------------------------------------------------------------------------------------------------------------------------------------------------------------------------------------------------------------------------------------------------------------------------------------------------------|--------------------------------------------------------------------------------------------------------------------------------------------------------------------------------------------------------------------------------------------------------------------------------------------------------------------------------------------------------------------------------------------------------------------------------------------------------------------------------------------------------------------------------------------------------------------------------------------------------------------------------------------------------------------------------------------------------------------------------------------------------------------------------------------------------------------------------------------------------------------------------------------------------------------------------------------------------------------------------------------------------------------------------------------------------------------------------------------------------------------------------------------------------------------------------------------------------------------------------------------------------------------------------|-------------------------------------------------------------------------------------------------------------------------------------------------------------------------------------------------------------------------------------------------------------------------------------------------------------------------------------------------------------------------------------------------------------------------------------------------------------------|----------------------------------------------------------------------------------------------------------------------------------------------------------------------------------------------------------------------------------------------------------------------------------------------------------------------------------------------------------------------------------------------------------------------------------------------------------------------------------------------------------------|
| 1<br>2<br>3<br>4<br>5<br>6<br>7<br>8<br>9                                                                                                                                                                                                                                                                                                                                                                                                                         | <input type="checkbox"/> Drug interaction<br><input type="checkbox"/> Participant stopped taking the meds<br><input type="checkbox"/> Lost to follow up<br><input type="checkbox"/> Dose adjustment (e.g. for weight change)<br><input type="checkbox"/> Death<br><input type="checkbox"/> Other _____<br><input type="checkbox"/> Unknown                                                                                                                                                                                                                                                                                                                                                                                                                                                                                                                                                                                                                                                                                                                                                                                                                                                                                                                                     |                                                                                                                                                                                                                                                                                                                                                                                                                                                                   |                                                                                                                                                                                                                                                                                                                                                                                                                                                                                                                |
| 10<br>11                                                                                                                                                                                                                                                                                                                                                                                                                                                          | <b>TB Drug 10</b>                                                                                                                                                                                                                                                                                                                                                                                                                                                                                                                                                                                                                                                                                                                                                                                                                                                                                                                                                                                                                                                                                                                                                                                                                                                              |                                                                                                                                                                                                                                                                                                                                                                                                                                                                   |                                                                                                                                                                                                                                                                                                                                                                                                                                                                                                                |
| 12<br>13<br>14<br>15<br>16<br>17<br>18<br>19<br>20<br>21<br>22<br>23<br>24<br>25<br>26<br>27<br>28<br>29<br>30<br>31                                                                                                                                                                                                                                                                                                                                              | 10. TB Drug 10<br>(Select one) <table border="1" style="width: 100%; border-collapse: collapse;"> <tr> <td style="width: 50%; vertical-align: top;"> <input type="checkbox"/> RHZE<br/> <input type="checkbox"/> RH<br/> <input type="checkbox"/> Rifampicin<br/> <input type="checkbox"/> Pyrazinamide<br/> <input type="checkbox"/> Isoniazid<br/> <input type="checkbox"/> Ethambutol<br/> <input type="checkbox"/> Streptomycin<br/> <input type="checkbox"/> Rifabutin<br/> <input type="checkbox"/> Amikacin<br/> <input type="checkbox"/> Kanamycin<br/> <input type="checkbox"/> Capreomycin<br/> <input type="checkbox"/> Ofloxacin           </td> <td style="width: 50%; vertical-align: top;"> <input type="checkbox"/> Levofloxacin<br/> <input type="checkbox"/> Moxifloxacin<br/> <input type="checkbox"/> Terizidone<br/> <input type="checkbox"/> Cycloserine<br/> <input type="checkbox"/> Ethionamide<br/> <input type="checkbox"/> Prothionamide<br/> <input type="checkbox"/> Para-aminosalicylic acid (PAS)<br/> <input type="checkbox"/> Clofazimine<br/> <input type="checkbox"/> Linezolid<br/> <input type="checkbox"/> Imipenem<br/> <input type="checkbox"/> Bedaquiline<br/> <input type="checkbox"/> Other: _____           </td> </tr> </table> | <input type="checkbox"/> RHZE<br><input type="checkbox"/> RH<br><input type="checkbox"/> Rifampicin<br><input type="checkbox"/> Pyrazinamide<br><input type="checkbox"/> Isoniazid<br><input type="checkbox"/> Ethambutol<br><input type="checkbox"/> Streptomycin<br><input type="checkbox"/> Rifabutin<br><input type="checkbox"/> Amikacin<br><input type="checkbox"/> Kanamycin<br><input type="checkbox"/> Capreomycin<br><input type="checkbox"/> Ofloxacin | <input type="checkbox"/> Levofloxacin<br><input type="checkbox"/> Moxifloxacin<br><input type="checkbox"/> Terizidone<br><input type="checkbox"/> Cycloserine<br><input type="checkbox"/> Ethionamide<br><input type="checkbox"/> Prothionamide<br><input type="checkbox"/> Para-aminosalicylic acid (PAS)<br><input type="checkbox"/> Clofazimine<br><input type="checkbox"/> Linezolid<br><input type="checkbox"/> Imipenem<br><input type="checkbox"/> Bedaquiline<br><input type="checkbox"/> Other: _____ |
| <input type="checkbox"/> RHZE<br><input type="checkbox"/> RH<br><input type="checkbox"/> Rifampicin<br><input type="checkbox"/> Pyrazinamide<br><input type="checkbox"/> Isoniazid<br><input type="checkbox"/> Ethambutol<br><input type="checkbox"/> Streptomycin<br><input type="checkbox"/> Rifabutin<br><input type="checkbox"/> Amikacin<br><input type="checkbox"/> Kanamycin<br><input type="checkbox"/> Capreomycin<br><input type="checkbox"/> Ofloxacin | <input type="checkbox"/> Levofloxacin<br><input type="checkbox"/> Moxifloxacin<br><input type="checkbox"/> Terizidone<br><input type="checkbox"/> Cycloserine<br><input type="checkbox"/> Ethionamide<br><input type="checkbox"/> Prothionamide<br><input type="checkbox"/> Para-aminosalicylic acid (PAS)<br><input type="checkbox"/> Clofazimine<br><input type="checkbox"/> Linezolid<br><input type="checkbox"/> Imipenem<br><input type="checkbox"/> Bedaquiline<br><input type="checkbox"/> Other: _____                                                                                                                                                                                                                                                                                                                                                                                                                                                                                                                                                                                                                                                                                                                                                                 |                                                                                                                                                                                                                                                                                                                                                                                                                                                                   |                                                                                                                                                                                                                                                                                                                                                                                                                                                                                                                |
| 32<br>33<br>34<br>35<br>36                                                                                                                                                                                                                                                                                                                                                                                                                                        | 10a. If RHZE, combination:<br><input type="checkbox"/> RHZE 150/75/400/275 - 2 tablets<br><input type="checkbox"/> RHZE 150/75/400/275 - 3 tablets<br><input type="checkbox"/> RHZE 150/75/400/275 - 4 tablets<br><input type="checkbox"/> RHZE 150/75/400/275 - 5 tablets                                                                                                                                                                                                                                                                                                                                                                                                                                                                                                                                                                                                                                                                                                                                                                                                                                                                                                                                                                                                     |                                                                                                                                                                                                                                                                                                                                                                                                                                                                   |                                                                                                                                                                                                                                                                                                                                                                                                                                                                                                                |
| 37<br>38<br>39<br>40<br>41<br>42<br>43<br>44<br>45<br>46                                                                                                                                                                                                                                                                                                                                                                                                          | 10b. If RH, combination:<br><input type="checkbox"/> RH 150/75 - 2 tablets<br><input type="checkbox"/> RH 150/75 - 3 tablets<br><input type="checkbox"/> RH 150/75 - 4 tablets<br><input type="checkbox"/> RH 150/75 - 5 tablets<br><input type="checkbox"/> RH 300/200 - 1 tablet or capsule<br><input type="checkbox"/> RH 300/200 - 2 tablets or capsules<br><input type="checkbox"/> RH 300/200 - 1 tablet or capsule + RH 150/100 - 1 tablet<br><input type="checkbox"/> RH 300/200 - 2 tablets or capsules + RH 150/100 - 1 tablet                                                                                                                                                                                                                                                                                                                                                                                                                                                                                                                                                                                                                                                                                                                                       |                                                                                                                                                                                                                                                                                                                                                                                                                                                                   |                                                                                                                                                                                                                                                                                                                                                                                                                                                                                                                |
| 47<br>48                                                                                                                                                                                                                                                                                                                                                                                                                                                          | 10c. Other drugs - Dose (mg)<br> _ _ _ _                                                                                                                                                                                                                                                                                                                                                                                                                                                                                                                                                                                                                                                                                                                                                                                                                                                                                                                                                                                                                                                                                                                                                                                                                                       |                                                                                                                                                                                                                                                                                                                                                                                                                                                                   |                                                                                                                                                                                                                                                                                                                                                                                                                                                                                                                |
| 49<br>50<br>51<br>52                                                                                                                                                                                                                                                                                                                                                                                                                                              | 10d. How many times a day is this medication prescribed?<br> _ _ _ _                                                                                                                                                                                                                                                                                                                                                                                                                                                                                                                                                                                                                                                                                                                                                                                                                                                                                                                                                                                                                                                                                                                                                                                                           |                                                                                                                                                                                                                                                                                                                                                                                                                                                                   |                                                                                                                                                                                                                                                                                                                                                                                                                                                                                                                |
| 53<br>54<br>55                                                                                                                                                                                                                                                                                                                                                                                                                                                    | 10e. How many days a week is this medication prescribed?<br> _ _ _ _                                                                                                                                                                                                                                                                                                                                                                                                                                                                                                                                                                                                                                                                                                                                                                                                                                                                                                                                                                                                                                                                                                                                                                                                           |                                                                                                                                                                                                                                                                                                                                                                                                                                                                   |                                                                                                                                                                                                                                                                                                                                                                                                                                                                                                                |
| 56<br>57<br>58                                                                                                                                                                                                                                                                                                                                                                                                                                                    | 10f. Start Date<br> _ _ / _ _ / _ _ _ _  (dd/mm/yyyy)                                                                                                                                                                                                                                                                                                                                                                                                                                                                                                                                                                                                                                                                                                                                                                                                                                                                                                                                                                                                                                                                                                                                                                                                                          |                                                                                                                                                                                                                                                                                                                                                                                                                                                                   |                                                                                                                                                                                                                                                                                                                                                                                                                                                                                                                |
| 59<br>60                                                                                                                                                                                                                                                                                                                                                                                                                                                          | 10g. Stop Date<br> _ _ / _ _ / _ _ _ _  (dd/mm/yyyy)                                                                                                                                                                                                                                                                                                                                                                                                                                                                                                                                                                                                                                                                                                                                                                                                                                                                                                                                                                                                                                                                                                                                                                                                                           |                                                                                                                                                                                                                                                                                                                                                                                                                                                                   |                                                                                                                                                                                                                                                                                                                                                                                                                                                                                                                |

## IeDEA TB SRN

|                                                                                                                                                                                                                                                                                                                                                                                                                                                                   |                                                                                                                                                                                                                                                                                                                                                                                                                                                                                                               |                                                                                                                                                                                                                                                                                                                                                                                                                                                                                                                                                                                                                                                                                                                                                                                                                                                                                                                                                                                                                                                                                                              |                                                                                                                                                                                                                                                                                                                                                                                                                                                                   |                                                                                                                                                                                                                                                                                                                                                                                                                                                                                                               |
|-------------------------------------------------------------------------------------------------------------------------------------------------------------------------------------------------------------------------------------------------------------------------------------------------------------------------------------------------------------------------------------------------------------------------------------------------------------------|---------------------------------------------------------------------------------------------------------------------------------------------------------------------------------------------------------------------------------------------------------------------------------------------------------------------------------------------------------------------------------------------------------------------------------------------------------------------------------------------------------------|--------------------------------------------------------------------------------------------------------------------------------------------------------------------------------------------------------------------------------------------------------------------------------------------------------------------------------------------------------------------------------------------------------------------------------------------------------------------------------------------------------------------------------------------------------------------------------------------------------------------------------------------------------------------------------------------------------------------------------------------------------------------------------------------------------------------------------------------------------------------------------------------------------------------------------------------------------------------------------------------------------------------------------------------------------------------------------------------------------------|-------------------------------------------------------------------------------------------------------------------------------------------------------------------------------------------------------------------------------------------------------------------------------------------------------------------------------------------------------------------------------------------------------------------------------------------------------------------|---------------------------------------------------------------------------------------------------------------------------------------------------------------------------------------------------------------------------------------------------------------------------------------------------------------------------------------------------------------------------------------------------------------------------------------------------------------------------------------------------------------|
| 1<br>2<br>3<br>4<br>5                                                                                                                                                                                                                                                                                                                                                                                                                                             |                                                                                                                                                                                                                                                                                                                                                                                                                                                                                                               | <input type="checkbox"/> Treatment Ongoing <i>(Return to update the status at next visit. Update stop date and reason once medication is stopped.)</i><br><input type="checkbox"/> Unknown                                                                                                                                                                                                                                                                                                                                                                                                                                                                                                                                                                                                                                                                                                                                                                                                                                                                                                                   |                                                                                                                                                                                                                                                                                                                                                                                                                                                                   |                                                                                                                                                                                                                                                                                                                                                                                                                                                                                                               |
| 6<br>7<br>8<br>9<br>10<br>11<br>12<br>13<br>14<br>15<br>16<br>17<br>18<br>19<br>20<br>21                                                                                                                                                                                                                                                                                                                                                                          | 10h. Reason for change, interruption or completion                                                                                                                                                                                                                                                                                                                                                                                                                                                            | <input type="checkbox"/> Completed intensive phase<br><input type="checkbox"/> Completed continuation phase<br><input type="checkbox"/> TB treatment failure<br><input type="checkbox"/> Drug resistance<br><input type="checkbox"/> Pregnancy<br><input type="checkbox"/> Side effects or toxicity<br><input type="checkbox"/> Incompatibility with ART (antiretroviral treatment)<br><input type="checkbox"/> Drug interaction<br><input type="checkbox"/> Participant stopped taking the meds<br><input type="checkbox"/> Lost to follow up<br><input type="checkbox"/> Dose adjustment (e.g. for weight change)<br><input type="checkbox"/> Death<br><input type="checkbox"/> Other _____<br><input type="checkbox"/> Unknown                                                                                                                                                                                                                                                                                                                                                                            |                                                                                                                                                                                                                                                                                                                                                                                                                                                                   |                                                                                                                                                                                                                                                                                                                                                                                                                                                                                                               |
| 22<br>23                                                                                                                                                                                                                                                                                                                                                                                                                                                          | <b>TB Drug 11</b>                                                                                                                                                                                                                                                                                                                                                                                                                                                                                             |                                                                                                                                                                                                                                                                                                                                                                                                                                                                                                                                                                                                                                                                                                                                                                                                                                                                                                                                                                                                                                                                                                              |                                                                                                                                                                                                                                                                                                                                                                                                                                                                   |                                                                                                                                                                                                                                                                                                                                                                                                                                                                                                               |
| 24<br>25<br>26<br>27<br>28<br>29<br>30<br>31<br>32<br>33<br>34<br>35<br>36<br>37<br>38                                                                                                                                                                                                                                                                                                                                                                            | 11. TB Drug 11<br>(Select one)                                                                                                                                                                                                                                                                                                                                                                                                                                                                                | <table border="1"> <tr> <td> <input type="checkbox"/> RHZE<br/> <input type="checkbox"/> RH<br/> <input type="checkbox"/> Rifampicin<br/> <input type="checkbox"/> Pyrazinamide<br/> <input type="checkbox"/> Isoniazid<br/> <input type="checkbox"/> Ethambutol<br/> <input type="checkbox"/> Streptomycin<br/> <input type="checkbox"/> Rifabutin<br/> <input type="checkbox"/> Amikacin<br/> <input type="checkbox"/> Kanamycin<br/> <input type="checkbox"/> Capreomycin<br/> <input type="checkbox"/> Ofloxacin           </td> <td> <input type="checkbox"/> Levofloxacin<br/> <input type="checkbox"/> Moxifloxacin<br/> <input type="checkbox"/> Terizidone<br/> <input type="checkbox"/> Cycloserine<br/> <input type="checkbox"/> Ethionamide<br/> <input type="checkbox"/> Protionamide<br/> <input type="checkbox"/> Para-aminosalicylic acid (PAS)<br/> <input type="checkbox"/> Clofazimine<br/> <input type="checkbox"/> Linezolid<br/> <input type="checkbox"/> Imipenem<br/> <input type="checkbox"/> Bedaquiline<br/> <input type="checkbox"/> Other: _____           </td> </tr> </table> | <input type="checkbox"/> RHZE<br><input type="checkbox"/> RH<br><input type="checkbox"/> Rifampicin<br><input type="checkbox"/> Pyrazinamide<br><input type="checkbox"/> Isoniazid<br><input type="checkbox"/> Ethambutol<br><input type="checkbox"/> Streptomycin<br><input type="checkbox"/> Rifabutin<br><input type="checkbox"/> Amikacin<br><input type="checkbox"/> Kanamycin<br><input type="checkbox"/> Capreomycin<br><input type="checkbox"/> Ofloxacin | <input type="checkbox"/> Levofloxacin<br><input type="checkbox"/> Moxifloxacin<br><input type="checkbox"/> Terizidone<br><input type="checkbox"/> Cycloserine<br><input type="checkbox"/> Ethionamide<br><input type="checkbox"/> Protionamide<br><input type="checkbox"/> Para-aminosalicylic acid (PAS)<br><input type="checkbox"/> Clofazimine<br><input type="checkbox"/> Linezolid<br><input type="checkbox"/> Imipenem<br><input type="checkbox"/> Bedaquiline<br><input type="checkbox"/> Other: _____ |
| <input type="checkbox"/> RHZE<br><input type="checkbox"/> RH<br><input type="checkbox"/> Rifampicin<br><input type="checkbox"/> Pyrazinamide<br><input type="checkbox"/> Isoniazid<br><input type="checkbox"/> Ethambutol<br><input type="checkbox"/> Streptomycin<br><input type="checkbox"/> Rifabutin<br><input type="checkbox"/> Amikacin<br><input type="checkbox"/> Kanamycin<br><input type="checkbox"/> Capreomycin<br><input type="checkbox"/> Ofloxacin | <input type="checkbox"/> Levofloxacin<br><input type="checkbox"/> Moxifloxacin<br><input type="checkbox"/> Terizidone<br><input type="checkbox"/> Cycloserine<br><input type="checkbox"/> Ethionamide<br><input type="checkbox"/> Protionamide<br><input type="checkbox"/> Para-aminosalicylic acid (PAS)<br><input type="checkbox"/> Clofazimine<br><input type="checkbox"/> Linezolid<br><input type="checkbox"/> Imipenem<br><input type="checkbox"/> Bedaquiline<br><input type="checkbox"/> Other: _____ |                                                                                                                                                                                                                                                                                                                                                                                                                                                                                                                                                                                                                                                                                                                                                                                                                                                                                                                                                                                                                                                                                                              |                                                                                                                                                                                                                                                                                                                                                                                                                                                                   |                                                                                                                                                                                                                                                                                                                                                                                                                                                                                                               |
| 39<br>40<br>41<br>42<br>43<br>44                                                                                                                                                                                                                                                                                                                                                                                                                                  | 11a. If RHZE, combination:                                                                                                                                                                                                                                                                                                                                                                                                                                                                                    | <input type="checkbox"/> RHZE 150/75/400/275 - 2 tablets<br><input type="checkbox"/> RHZE 150/75/400/275 - 3 tablets<br><input type="checkbox"/> RHZE 150/75/400/275 - 4 tablets<br><input type="checkbox"/> RHZE 150/75/400/275 - 5 tablets                                                                                                                                                                                                                                                                                                                                                                                                                                                                                                                                                                                                                                                                                                                                                                                                                                                                 |                                                                                                                                                                                                                                                                                                                                                                                                                                                                   |                                                                                                                                                                                                                                                                                                                                                                                                                                                                                                               |
| 45<br>46<br>47<br>48<br>49<br>50<br>51<br>52<br>53                                                                                                                                                                                                                                                                                                                                                                                                                | 11b. If RH, combination:                                                                                                                                                                                                                                                                                                                                                                                                                                                                                      | <input type="checkbox"/> RH 150/75 - 2 tablets<br><input type="checkbox"/> RH 150/75 - 3 tablets<br><input type="checkbox"/> RH 150/75 - 4 tablets<br><input type="checkbox"/> RH 150/75 - 5 tablets<br><input type="checkbox"/> RH 300/200 - 1 tablet or capsule<br><input type="checkbox"/> RH 300/200 - 2 tablets or capsules<br><input type="checkbox"/> RH 300/200 - 1 tablet or capsule + RH 150/100 - 1 tablet<br><input type="checkbox"/> RH 300/200 - 2 tablets or capsules + RH 150/100 - 1 tablet                                                                                                                                                                                                                                                                                                                                                                                                                                                                                                                                                                                                 |                                                                                                                                                                                                                                                                                                                                                                                                                                                                   |                                                                                                                                                                                                                                                                                                                                                                                                                                                                                                               |
| 54<br>55                                                                                                                                                                                                                                                                                                                                                                                                                                                          | 11c. Other drugs - Dose (mg)                                                                                                                                                                                                                                                                                                                                                                                                                                                                                  | _ _ _ _                                                                                                                                                                                                                                                                                                                                                                                                                                                                                                                                                                                                                                                                                                                                                                                                                                                                                                                                                                                                                                                                                                      |                                                                                                                                                                                                                                                                                                                                                                                                                                                                   |                                                                                                                                                                                                                                                                                                                                                                                                                                                                                                               |
| 56<br>57<br>58<br>59                                                                                                                                                                                                                                                                                                                                                                                                                                              | 11d. How many times a day is this medication prescribed?                                                                                                                                                                                                                                                                                                                                                                                                                                                      | _ _ _                                                                                                                                                                                                                                                                                                                                                                                                                                                                                                                                                                                                                                                                                                                                                                                                                                                                                                                                                                                                                                                                                                        |                                                                                                                                                                                                                                                                                                                                                                                                                                                                   |                                                                                                                                                                                                                                                                                                                                                                                                                                                                                                               |
| 60                                                                                                                                                                                                                                                                                                                                                                                                                                                                | 11e. How many days a week is this medication prescribed?                                                                                                                                                                                                                                                                                                                                                                                                                                                      | _ _ _                                                                                                                                                                                                                                                                                                                                                                                                                                                                                                                                                                                                                                                                                                                                                                                                                                                                                                                                                                                                                                                                                                        |                                                                                                                                                                                                                                                                                                                                                                                                                                                                   |                                                                                                                                                                                                                                                                                                                                                                                                                                                                                                               |

**leDEA TB SRN**

|                                                                                                                                                                                                                                                                                                                                                                                                                                                                   |                                                                                                                                                                                                                                                                                                                                                                                                                                                                                                               |                                                                                                                                                                                                                                                                                                                                                                                                                                                                                                                                                                                                                                                                                                                                                                                                                                                                                                                                                                                                                                                                                                                                                  |  |                                                                                                                                                                                                                                                                                                                                                                                                                                                                   |                                                                                                                                                                                                                                                                                                                                                                                                                                                                                                               |
|-------------------------------------------------------------------------------------------------------------------------------------------------------------------------------------------------------------------------------------------------------------------------------------------------------------------------------------------------------------------------------------------------------------------------------------------------------------------|---------------------------------------------------------------------------------------------------------------------------------------------------------------------------------------------------------------------------------------------------------------------------------------------------------------------------------------------------------------------------------------------------------------------------------------------------------------------------------------------------------------|--------------------------------------------------------------------------------------------------------------------------------------------------------------------------------------------------------------------------------------------------------------------------------------------------------------------------------------------------------------------------------------------------------------------------------------------------------------------------------------------------------------------------------------------------------------------------------------------------------------------------------------------------------------------------------------------------------------------------------------------------------------------------------------------------------------------------------------------------------------------------------------------------------------------------------------------------------------------------------------------------------------------------------------------------------------------------------------------------------------------------------------------------|--|-------------------------------------------------------------------------------------------------------------------------------------------------------------------------------------------------------------------------------------------------------------------------------------------------------------------------------------------------------------------------------------------------------------------------------------------------------------------|---------------------------------------------------------------------------------------------------------------------------------------------------------------------------------------------------------------------------------------------------------------------------------------------------------------------------------------------------------------------------------------------------------------------------------------------------------------------------------------------------------------|
| 1<br>2<br>3<br>4                                                                                                                                                                                                                                                                                                                                                                                                                                                  | 11f. Start Date                                                                                                                                                                                                                                                                                                                                                                                                                                                                                               | _ _ / _ _ / _ _ _ _  (dd/mm/yyyy)                                                                                                                                                                                                                                                                                                                                                                                                                                                                                                                                                                                                                                                                                                                                                                                                                                                                                                                                                                                                                                                                                                                |  |                                                                                                                                                                                                                                                                                                                                                                                                                                                                   |                                                                                                                                                                                                                                                                                                                                                                                                                                                                                                               |
| 5<br>6<br>7<br>8<br>9<br>10                                                                                                                                                                                                                                                                                                                                                                                                                                       | 11g. Stop Date                                                                                                                                                                                                                                                                                                                                                                                                                                                                                                | _ _ / _ _ / _ _ _ _  (dd/mm/yyyy)                                                                                                                                                                                                                                                                                                                                                                                                                                                                                                                                                                                                                                                                                                                                                                                                                                                                                                                                                                                                                                                                                                                |  |                                                                                                                                                                                                                                                                                                                                                                                                                                                                   |                                                                                                                                                                                                                                                                                                                                                                                                                                                                                                               |
| 11<br>12<br>13<br>14<br>15<br>16<br>17<br>18<br>19<br>20<br>21<br>22<br>23<br>24<br>25<br>26<br>27                                                                                                                                                                                                                                                                                                                                                                | 11h. Reason for change, interruption or completion                                                                                                                                                                                                                                                                                                                                                                                                                                                            | <input type="checkbox"/> Completed intensive phase<br><input type="checkbox"/> Completed continuation phase<br><input type="checkbox"/> TB treatment failure<br><input type="checkbox"/> Drug resistance<br><input type="checkbox"/> Pregnancy<br><input type="checkbox"/> Side effects or toxicity<br><input type="checkbox"/> Incompatibility with ART (antiretroviral treatment)<br><input type="checkbox"/> Drug interaction<br><input type="checkbox"/> Participant stopped taking the meds<br><input type="checkbox"/> Lost to follow up<br><input type="checkbox"/> Dose adjustment (e.g. for weight change)<br><input type="checkbox"/> Death<br><input type="checkbox"/> Other _____<br><input type="checkbox"/> Unknown                                                                                                                                                                                                                                                                                                                                                                                                                |  |                                                                                                                                                                                                                                                                                                                                                                                                                                                                   |                                                                                                                                                                                                                                                                                                                                                                                                                                                                                                               |
| 28<br>29                                                                                                                                                                                                                                                                                                                                                                                                                                                          | <b>TB Drug 12</b>                                                                                                                                                                                                                                                                                                                                                                                                                                                                                             |                                                                                                                                                                                                                                                                                                                                                                                                                                                                                                                                                                                                                                                                                                                                                                                                                                                                                                                                                                                                                                                                                                                                                  |  |                                                                                                                                                                                                                                                                                                                                                                                                                                                                   |                                                                                                                                                                                                                                                                                                                                                                                                                                                                                                               |
| 30<br>31<br>32<br>33<br>34<br>35<br>36<br>37<br>38<br>39<br>40<br>41<br>42<br>43<br>44<br>45<br>46<br>47<br>48<br>49                                                                                                                                                                                                                                                                                                                                              | 12. Drug 12<br>(Select one)                                                                                                                                                                                                                                                                                                                                                                                                                                                                                   | <table border="1"> <tr> <td> <input type="checkbox"/> RHZE<br/> <input type="checkbox"/> RH<br/> <input type="checkbox"/> Rifampicin<br/> <input type="checkbox"/> Pyrazinamide<br/> <input type="checkbox"/> Isoniazid<br/> <input type="checkbox"/> Ethambutol<br/> <input type="checkbox"/> Streptomycin<br/> <input type="checkbox"/> Rifabutin<br/> <input type="checkbox"/> Amikacin<br/> <input type="checkbox"/> Kanamycin<br/> <input type="checkbox"/> Capreomycin<br/> <input type="checkbox"/> Ofloxacin                             </td> <td> <input type="checkbox"/> Levofloxacin<br/> <input type="checkbox"/> Moxifloxacin<br/> <input type="checkbox"/> Terizidone<br/> <input type="checkbox"/> Cycloserine<br/> <input type="checkbox"/> Ethionamide<br/> <input type="checkbox"/> Protionamide<br/> <input type="checkbox"/> Para-aminosalicylic acid (PAS)<br/> <input type="checkbox"/> Clofazimine<br/> <input type="checkbox"/> Linezolid<br/> <input type="checkbox"/> Imipenem<br/> <input type="checkbox"/> Bedaquiline<br/> <input type="checkbox"/> Other: _____                             </td> </tr> </table> |  | <input type="checkbox"/> RHZE<br><input type="checkbox"/> RH<br><input type="checkbox"/> Rifampicin<br><input type="checkbox"/> Pyrazinamide<br><input type="checkbox"/> Isoniazid<br><input type="checkbox"/> Ethambutol<br><input type="checkbox"/> Streptomycin<br><input type="checkbox"/> Rifabutin<br><input type="checkbox"/> Amikacin<br><input type="checkbox"/> Kanamycin<br><input type="checkbox"/> Capreomycin<br><input type="checkbox"/> Ofloxacin | <input type="checkbox"/> Levofloxacin<br><input type="checkbox"/> Moxifloxacin<br><input type="checkbox"/> Terizidone<br><input type="checkbox"/> Cycloserine<br><input type="checkbox"/> Ethionamide<br><input type="checkbox"/> Protionamide<br><input type="checkbox"/> Para-aminosalicylic acid (PAS)<br><input type="checkbox"/> Clofazimine<br><input type="checkbox"/> Linezolid<br><input type="checkbox"/> Imipenem<br><input type="checkbox"/> Bedaquiline<br><input type="checkbox"/> Other: _____ |
| <input type="checkbox"/> RHZE<br><input type="checkbox"/> RH<br><input type="checkbox"/> Rifampicin<br><input type="checkbox"/> Pyrazinamide<br><input type="checkbox"/> Isoniazid<br><input type="checkbox"/> Ethambutol<br><input type="checkbox"/> Streptomycin<br><input type="checkbox"/> Rifabutin<br><input type="checkbox"/> Amikacin<br><input type="checkbox"/> Kanamycin<br><input type="checkbox"/> Capreomycin<br><input type="checkbox"/> Ofloxacin | <input type="checkbox"/> Levofloxacin<br><input type="checkbox"/> Moxifloxacin<br><input type="checkbox"/> Terizidone<br><input type="checkbox"/> Cycloserine<br><input type="checkbox"/> Ethionamide<br><input type="checkbox"/> Protionamide<br><input type="checkbox"/> Para-aminosalicylic acid (PAS)<br><input type="checkbox"/> Clofazimine<br><input type="checkbox"/> Linezolid<br><input type="checkbox"/> Imipenem<br><input type="checkbox"/> Bedaquiline<br><input type="checkbox"/> Other: _____ |                                                                                                                                                                                                                                                                                                                                                                                                                                                                                                                                                                                                                                                                                                                                                                                                                                                                                                                                                                                                                                                                                                                                                  |  |                                                                                                                                                                                                                                                                                                                                                                                                                                                                   |                                                                                                                                                                                                                                                                                                                                                                                                                                                                                                               |
| 50<br>51<br>52<br>53<br>54                                                                                                                                                                                                                                                                                                                                                                                                                                        | 12a. If RHZE, combination:                                                                                                                                                                                                                                                                                                                                                                                                                                                                                    | <input type="checkbox"/> RHZE 150/75/400/275 - 2 tablets<br><input type="checkbox"/> RHZE 150/75/400/275 - 3 tablets<br><input type="checkbox"/> RHZE 150/75/400/275 - 4 tablets<br><input type="checkbox"/> RHZE 150/75/400/275 - 5 tablets                                                                                                                                                                                                                                                                                                                                                                                                                                                                                                                                                                                                                                                                                                                                                                                                                                                                                                     |  |                                                                                                                                                                                                                                                                                                                                                                                                                                                                   |                                                                                                                                                                                                                                                                                                                                                                                                                                                                                                               |
| 55<br>56<br>57<br>58<br>59<br>60                                                                                                                                                                                                                                                                                                                                                                                                                                  | 12b. If RH, combination:                                                                                                                                                                                                                                                                                                                                                                                                                                                                                      | <input type="checkbox"/> RH 150/75 - 2 tablets<br><input type="checkbox"/> RH 150/75 - 3 tablets<br><input type="checkbox"/> RH 150/75 - 4 tablets<br><input type="checkbox"/> RH 150/75 - 5 tablets<br><input type="checkbox"/> RH 300/200 - 1 tablet or capsule<br><input type="checkbox"/> RH 300/200 - 2 tablets or capsules                                                                                                                                                                                                                                                                                                                                                                                                                                                                                                                                                                                                                                                                                                                                                                                                                 |  |                                                                                                                                                                                                                                                                                                                                                                                                                                                                   |                                                                                                                                                                                                                                                                                                                                                                                                                                                                                                               |

## IeDEA TB SRN

|    |                                                          |                                                                                                                                                                                                                                                                                                                                                                                                                                                                                                                                                                                                                                                                                                                                   |
|----|----------------------------------------------------------|-----------------------------------------------------------------------------------------------------------------------------------------------------------------------------------------------------------------------------------------------------------------------------------------------------------------------------------------------------------------------------------------------------------------------------------------------------------------------------------------------------------------------------------------------------------------------------------------------------------------------------------------------------------------------------------------------------------------------------------|
| 1  |                                                          | <input type="checkbox"/> RH 300/200 - 1 tablet or capsule + RH 150/100 - 1 tablet                                                                                                                                                                                                                                                                                                                                                                                                                                                                                                                                                                                                                                                 |
| 2  |                                                          | <input type="checkbox"/> RH 300/200 - 2 tablets or capsules + RH 150/100 - 1 tablet                                                                                                                                                                                                                                                                                                                                                                                                                                                                                                                                                                                                                                               |
| 3  |                                                          |                                                                                                                                                                                                                                                                                                                                                                                                                                                                                                                                                                                                                                                                                                                                   |
| 4  |                                                          |                                                                                                                                                                                                                                                                                                                                                                                                                                                                                                                                                                                                                                                                                                                                   |
| 5  | 12c. Other drugs - Dose (mg)                             | _ _ _ _                                                                                                                                                                                                                                                                                                                                                                                                                                                                                                                                                                                                                                                                                                                           |
| 6  |                                                          |                                                                                                                                                                                                                                                                                                                                                                                                                                                                                                                                                                                                                                                                                                                                   |
| 7  | 12d. How many times a day is this medication prescribed? | _ _ _                                                                                                                                                                                                                                                                                                                                                                                                                                                                                                                                                                                                                                                                                                                             |
| 8  |                                                          |                                                                                                                                                                                                                                                                                                                                                                                                                                                                                                                                                                                                                                                                                                                                   |
| 9  |                                                          |                                                                                                                                                                                                                                                                                                                                                                                                                                                                                                                                                                                                                                                                                                                                   |
| 10 | 12e. How many days a week is this medication prescribed? | _ _ _                                                                                                                                                                                                                                                                                                                                                                                                                                                                                                                                                                                                                                                                                                                             |
| 11 |                                                          |                                                                                                                                                                                                                                                                                                                                                                                                                                                                                                                                                                                                                                                                                                                                   |
| 12 |                                                          |                                                                                                                                                                                                                                                                                                                                                                                                                                                                                                                                                                                                                                                                                                                                   |
| 13 | 12f. Start Date                                          | _ _ / _ _ / _ _ _ _  (dd/mm/yyyy)                                                                                                                                                                                                                                                                                                                                                                                                                                                                                                                                                                                                                                                                                                 |
| 14 |                                                          |                                                                                                                                                                                                                                                                                                                                                                                                                                                                                                                                                                                                                                                                                                                                   |
| 15 |                                                          |                                                                                                                                                                                                                                                                                                                                                                                                                                                                                                                                                                                                                                                                                                                                   |
| 16 | 12g. Stop Date                                           | _ _ / _ _ / _ _ _ _  (dd/mm/yyyy)                                                                                                                                                                                                                                                                                                                                                                                                                                                                                                                                                                                                                                                                                                 |
| 17 |                                                          |                                                                                                                                                                                                                                                                                                                                                                                                                                                                                                                                                                                                                                                                                                                                   |
| 18 |                                                          |                                                                                                                                                                                                                                                                                                                                                                                                                                                                                                                                                                                                                                                                                                                                   |
| 19 |                                                          | <input type="checkbox"/> Treatment Ongoing ( <i>Return to update the status at next visit. Update stop date and reason once medication is stopped.</i> )                                                                                                                                                                                                                                                                                                                                                                                                                                                                                                                                                                          |
| 20 |                                                          | <input type="checkbox"/> Unknown                                                                                                                                                                                                                                                                                                                                                                                                                                                                                                                                                                                                                                                                                                  |
| 21 |                                                          |                                                                                                                                                                                                                                                                                                                                                                                                                                                                                                                                                                                                                                                                                                                                   |
| 22 |                                                          |                                                                                                                                                                                                                                                                                                                                                                                                                                                                                                                                                                                                                                                                                                                                   |
| 23 | 12h. Reason for change, interruption or completion       | <input type="checkbox"/> Completed intensive phase<br><input type="checkbox"/> Completed continuation phase<br><input type="checkbox"/> TB treatment failure<br><input type="checkbox"/> Drug resistance<br><input type="checkbox"/> Pregnancy<br><input type="checkbox"/> Side effects or toxicity<br><input type="checkbox"/> Incompatibility with ART (antiretroviral treatment)<br><input type="checkbox"/> Drug interaction<br><input type="checkbox"/> Participant stopped taking the meds<br><input type="checkbox"/> Lost to follow up<br><input type="checkbox"/> Dose adjustment (e.g. for weight change)<br><input type="checkbox"/> Death<br><input type="checkbox"/> Other _____<br><input type="checkbox"/> Unknown |
| 24 |                                                          |                                                                                                                                                                                                                                                                                                                                                                                                                                                                                                                                                                                                                                                                                                                                   |
| 25 |                                                          |                                                                                                                                                                                                                                                                                                                                                                                                                                                                                                                                                                                                                                                                                                                                   |
| 26 |                                                          |                                                                                                                                                                                                                                                                                                                                                                                                                                                                                                                                                                                                                                                                                                                                   |
| 27 |                                                          |                                                                                                                                                                                                                                                                                                                                                                                                                                                                                                                                                                                                                                                                                                                                   |
| 28 |                                                          |                                                                                                                                                                                                                                                                                                                                                                                                                                                                                                                                                                                                                                                                                                                                   |
| 29 |                                                          |                                                                                                                                                                                                                                                                                                                                                                                                                                                                                                                                                                                                                                                                                                                                   |
| 30 |                                                          |                                                                                                                                                                                                                                                                                                                                                                                                                                                                                                                                                                                                                                                                                                                                   |
| 31 |                                                          |                                                                                                                                                                                                                                                                                                                                                                                                                                                                                                                                                                                                                                                                                                                                   |
| 32 |                                                          |                                                                                                                                                                                                                                                                                                                                                                                                                                                                                                                                                                                                                                                                                                                                   |
| 33 |                                                          |                                                                                                                                                                                                                                                                                                                                                                                                                                                                                                                                                                                                                                                                                                                                   |
| 34 |                                                          |                                                                                                                                                                                                                                                                                                                                                                                                                                                                                                                                                                                                                                                                                                                                   |
| 35 |                                                          |                                                                                                                                                                                                                                                                                                                                                                                                                                                                                                                                                                                                                                                                                                                                   |
| 36 |                                                          |                                                                                                                                                                                                                                                                                                                                                                                                                                                                                                                                                                                                                                                                                                                                   |
| 37 |                                                          |                                                                                                                                                                                                                                                                                                                                                                                                                                                                                                                                                                                                                                                                                                                                   |
| 38 |                                                          |                                                                                                                                                                                                                                                                                                                                                                                                                                                                                                                                                                                                                                                                                                                                   |
| 39 |                                                          |                                                                                                                                                                                                                                                                                                                                                                                                                                                                                                                                                                                                                                                                                                                                   |
| 40 | <b>TB Drug 13</b>                                        |                                                                                                                                                                                                                                                                                                                                                                                                                                                                                                                                                                                                                                                                                                                                   |
| 41 |                                                          |                                                                                                                                                                                                                                                                                                                                                                                                                                                                                                                                                                                                                                                                                                                                   |
| 42 | 13. TB Drug 13                                           |                                                                                                                                                                                                                                                                                                                                                                                                                                                                                                                                                                                                                                                                                                                                   |
| 43 | (Select one)                                             |                                                                                                                                                                                                                                                                                                                                                                                                                                                                                                                                                                                                                                                                                                                                   |
| 44 |                                                          | <input type="checkbox"/> RHZE<br><input type="checkbox"/> RH<br><input type="checkbox"/> Rifampicin<br><input type="checkbox"/> Pyrazinamide<br><input type="checkbox"/> Isoniazid<br><input type="checkbox"/> Ethambutol<br><input type="checkbox"/> Streptomycin<br><input type="checkbox"/> Rifabutin<br><input type="checkbox"/> Amikacin<br><input type="checkbox"/> Kanamycin<br><input type="checkbox"/> Capreomycin<br><input type="checkbox"/> Ofloxacin                                                                                                                                                                                                                                                                 |
| 45 |                                                          | <input type="checkbox"/> Levofloxacin<br><input type="checkbox"/> Moxifloxacin<br><input type="checkbox"/> Terizidone<br><input type="checkbox"/> Cycloserine<br><input type="checkbox"/> Ethionamide<br><input type="checkbox"/> Protionamide<br><input type="checkbox"/> Para-aminosalicylic acid (PAS)<br><input type="checkbox"/> Clofazimine<br><input type="checkbox"/> Linezolid<br><input type="checkbox"/> Imipenem<br><input type="checkbox"/> Bedaquiline<br><input type="checkbox"/> Other: _____                                                                                                                                                                                                                     |
| 46 |                                                          |                                                                                                                                                                                                                                                                                                                                                                                                                                                                                                                                                                                                                                                                                                                                   |
| 47 |                                                          |                                                                                                                                                                                                                                                                                                                                                                                                                                                                                                                                                                                                                                                                                                                                   |
| 48 |                                                          |                                                                                                                                                                                                                                                                                                                                                                                                                                                                                                                                                                                                                                                                                                                                   |
| 49 |                                                          |                                                                                                                                                                                                                                                                                                                                                                                                                                                                                                                                                                                                                                                                                                                                   |
| 50 |                                                          |                                                                                                                                                                                                                                                                                                                                                                                                                                                                                                                                                                                                                                                                                                                                   |
| 51 |                                                          |                                                                                                                                                                                                                                                                                                                                                                                                                                                                                                                                                                                                                                                                                                                                   |
| 52 |                                                          |                                                                                                                                                                                                                                                                                                                                                                                                                                                                                                                                                                                                                                                                                                                                   |
| 53 |                                                          |                                                                                                                                                                                                                                                                                                                                                                                                                                                                                                                                                                                                                                                                                                                                   |
| 54 |                                                          |                                                                                                                                                                                                                                                                                                                                                                                                                                                                                                                                                                                                                                                                                                                                   |
| 55 |                                                          |                                                                                                                                                                                                                                                                                                                                                                                                                                                                                                                                                                                                                                                                                                                                   |
| 56 |                                                          |                                                                                                                                                                                                                                                                                                                                                                                                                                                                                                                                                                                                                                                                                                                                   |
| 57 |                                                          |                                                                                                                                                                                                                                                                                                                                                                                                                                                                                                                                                                                                                                                                                                                                   |
| 58 |                                                          |                                                                                                                                                                                                                                                                                                                                                                                                                                                                                                                                                                                                                                                                                                                                   |
| 59 |                                                          |                                                                                                                                                                                                                                                                                                                                                                                                                                                                                                                                                                                                                                                                                                                                   |
| 60 |                                                          |                                                                                                                                                                                                                                                                                                                                                                                                                                                                                                                                                                                                                                                                                                                                   |

**leDEA TB SRN**

|                                                                                                    |                                                          |                                                                                                                                                                                                                                                                                                                                                                                                                                                                                                                                                                                                                                                                                                                                   |
|----------------------------------------------------------------------------------------------------|----------------------------------------------------------|-----------------------------------------------------------------------------------------------------------------------------------------------------------------------------------------------------------------------------------------------------------------------------------------------------------------------------------------------------------------------------------------------------------------------------------------------------------------------------------------------------------------------------------------------------------------------------------------------------------------------------------------------------------------------------------------------------------------------------------|
| 1<br>2<br>3<br>4<br>5<br>6                                                                         | 13a. If RHZE, combination:                               | <input type="checkbox"/> RHZE 150/75/400/275 - 2 tablets<br><input type="checkbox"/> RHZE 150/75/400/275 - 3 tablets<br><input type="checkbox"/> RHZE 150/75/400/275 - 4 tablets<br><input type="checkbox"/> RHZE 150/75/400/275 - 5 tablets                                                                                                                                                                                                                                                                                                                                                                                                                                                                                      |
| 7<br>8<br>9<br>10<br>11<br>12<br>13<br>14<br>15<br>16                                              | 13b. If RH, combination:                                 | <input type="checkbox"/> RH 150/75 - 2 tablets<br><input type="checkbox"/> RH 150/75 - 3 tablets<br><input type="checkbox"/> RH 150/75 - 4 tablets<br><input type="checkbox"/> RH 150/75 - 5 tablets<br><input type="checkbox"/> RH 300/200 - 1 tablet or capsule<br><input type="checkbox"/> RH 300/200 - 2 tablets or capsules<br><input type="checkbox"/> RH 300/200 - 1 tablet or capsule + RH 150/100 - 1 tablet<br><input type="checkbox"/> RH 300/200 - 2 tablets or capsules + RH 150/100 - 1 tablet                                                                                                                                                                                                                      |
| 17<br>18                                                                                           | 13c. Other drugs – Dose (mg)                             | _ _ _ _                                                                                                                                                                                                                                                                                                                                                                                                                                                                                                                                                                                                                                                                                                                           |
| 19<br>20<br>21                                                                                     | 13d. How many times a day is this medication prescribed? | _ _ _                                                                                                                                                                                                                                                                                                                                                                                                                                                                                                                                                                                                                                                                                                                             |
| 22<br>23<br>24                                                                                     | 13e. How many days a week is this medication prescribed? | _ _ _                                                                                                                                                                                                                                                                                                                                                                                                                                                                                                                                                                                                                                                                                                                             |
| 25<br>26<br>27                                                                                     | 13f. Start Date                                          | _ _ / _ _ / _ _ _ _  (dd/mm/yyyy)                                                                                                                                                                                                                                                                                                                                                                                                                                                                                                                                                                                                                                                                                                 |
| 28<br>29<br>30<br>31<br>32<br>33<br>34                                                             | 13g. Stop Date                                           | _ _ / _ _ / _ _ _ _  (dd/mm/yyyy)<br><br><input type="checkbox"/> Treatment Ongoing <i>(Return to update the status at next visit. Update stop date and reason once medication is stopped.)</i><br><input type="checkbox"/> Unknown                                                                                                                                                                                                                                                                                                                                                                                                                                                                                               |
| 35<br>36<br>37<br>38<br>39<br>40<br>41<br>42<br>43<br>44<br>45<br>46<br>47<br>48<br>49<br>50<br>51 | 13h. Reason for change, interruption or completion       | <input type="checkbox"/> Completed intensive phase<br><input type="checkbox"/> Completed continuation phase<br><input type="checkbox"/> TB treatment failure<br><input type="checkbox"/> Drug resistance<br><input type="checkbox"/> Pregnancy<br><input type="checkbox"/> Side effects or toxicity<br><input type="checkbox"/> Incompatibility with ART (antiretroviral treatment)<br><input type="checkbox"/> Drug interaction<br><input type="checkbox"/> Participant stopped taking the meds<br><input type="checkbox"/> Lost to follow up<br><input type="checkbox"/> Dose adjustment (e.g. for weight change)<br><input type="checkbox"/> Death<br><input type="checkbox"/> Other _____<br><input type="checkbox"/> Unknown |
| 52<br>53<br>54<br>55<br>56<br>57<br>58<br>59<br>60                                                 | <b>TB Drug 14</b>                                        |                                                                                                                                                                                                                                                                                                                                                                                                                                                                                                                                                                                                                                                                                                                                   |



## IeDEA TB SRN

|                                                                                                             |                                                          |                                                                                                                                                                                                                                                                                                                                                                                                                                                                                                              |                                                                                                                                                                                                                                                                                                                                                                                                                                                                                                               |
|-------------------------------------------------------------------------------------------------------------|----------------------------------------------------------|--------------------------------------------------------------------------------------------------------------------------------------------------------------------------------------------------------------------------------------------------------------------------------------------------------------------------------------------------------------------------------------------------------------------------------------------------------------------------------------------------------------|---------------------------------------------------------------------------------------------------------------------------------------------------------------------------------------------------------------------------------------------------------------------------------------------------------------------------------------------------------------------------------------------------------------------------------------------------------------------------------------------------------------|
| 1<br>2<br>3<br>4<br>5<br>6<br>7<br>8<br>9<br>10<br>11<br>12<br>13<br>14<br>15<br>16<br>17<br>18<br>19<br>20 | 14. TB Drug 14<br>(Select one)                           | <input type="checkbox"/> RHZE<br><input type="checkbox"/> RH<br><input type="checkbox"/> Rifampicin<br><input type="checkbox"/> Pyrazinamide<br><input type="checkbox"/> Isoniazid<br><input type="checkbox"/> Ethambutol<br><input type="checkbox"/> Streptomycin<br><input type="checkbox"/> Rifabutin<br><input type="checkbox"/> Amikacin<br><input type="checkbox"/> Kanamycin<br><input type="checkbox"/> Capreomycin<br><input type="checkbox"/> Ofloxacin                                            | <input type="checkbox"/> Levofloxacin<br><input type="checkbox"/> Moxifloxacin<br><input type="checkbox"/> Terizidone<br><input type="checkbox"/> Cycloserine<br><input type="checkbox"/> Ethionamide<br><input type="checkbox"/> Protionamide<br><input type="checkbox"/> Para-aminosalicylic acid (PAS)<br><input type="checkbox"/> Clofazimine<br><input type="checkbox"/> Linezolid<br><input type="checkbox"/> Imipenem<br><input type="checkbox"/> Bedaquiline<br><input type="checkbox"/> Other: _____ |
| 21<br>22<br>23<br>24<br>25                                                                                  | 14a. If RHZE, combination:                               | <input type="checkbox"/> RHZE 150/75/400/275 - 2 tablets<br><input type="checkbox"/> RHZE 150/75/400/275 - 3 tablets<br><input type="checkbox"/> RHZE 150/75/400/275 - 4 tablets<br><input type="checkbox"/> RHZE 150/75/400/275 - 5 tablets                                                                                                                                                                                                                                                                 |                                                                                                                                                                                                                                                                                                                                                                                                                                                                                                               |
| 26<br>27<br>28<br>29<br>30<br>31<br>32<br>33<br>34<br>35                                                    | 14b. f RH, combination:                                  | <input type="checkbox"/> RH 150/75 - 2 tablets<br><input type="checkbox"/> RH 150/75 - 3 tablets<br><input type="checkbox"/> RH 150/75 - 4 tablets<br><input type="checkbox"/> RH 150/75 - 5 tablets<br><input type="checkbox"/> RH 300/200 - 1 tablet or capsule<br><input type="checkbox"/> RH 300/200 - 2 tablets or capsules<br><input type="checkbox"/> RH 300/200 - 1 tablet or capsule + RH 150/100 - 1 tablet<br><input type="checkbox"/> RH 300/200 - 2 tablets or capsules + RH 150/100 - 1 tablet |                                                                                                                                                                                                                                                                                                                                                                                                                                                                                                               |
| 36<br>37                                                                                                    | 14c. Other drugs – Dose (mg)                             | _ _ _ _                                                                                                                                                                                                                                                                                                                                                                                                                                                                                                      |                                                                                                                                                                                                                                                                                                                                                                                                                                                                                                               |
| 38<br>39<br>40                                                                                              | 14d. How many times a day is this medication prescribed? | _ _ _                                                                                                                                                                                                                                                                                                                                                                                                                                                                                                        |                                                                                                                                                                                                                                                                                                                                                                                                                                                                                                               |
| 41<br>42<br>43                                                                                              | 14e. How many days a week is this medication prescribed? | _ _ _                                                                                                                                                                                                                                                                                                                                                                                                                                                                                                        |                                                                                                                                                                                                                                                                                                                                                                                                                                                                                                               |
| 44<br>45<br>46<br>47                                                                                        | 14f. 1Start Date                                         | _ _ / _ _ / _ _ _ _  (dd/mm/yyyy)                                                                                                                                                                                                                                                                                                                                                                                                                                                                            |                                                                                                                                                                                                                                                                                                                                                                                                                                                                                                               |
| 48<br>49<br>50<br>51<br>52<br>53<br>54                                                                      | 14g. Stop Date                                           | _ _ / _ _ / _ _ _ _  (dd/mm/yyyy)<br><br><input type="checkbox"/> Treatment Ongoing (Return to update the status at next visit. Update stop date and reason once medication is stopped.)<br><input type="checkbox"/> Unknown                                                                                                                                                                                                                                                                                 |                                                                                                                                                                                                                                                                                                                                                                                                                                                                                                               |
| 55<br>56<br>57<br>58<br>59<br>60                                                                            | 14h. Reason for change, interruption or completion       | <input type="checkbox"/> Completed intensive phase<br><input type="checkbox"/> Completed continuation phase<br><input type="checkbox"/> TB treatment failure<br><input type="checkbox"/> Drug resistance<br><input type="checkbox"/> Pregnancy<br><input type="checkbox"/> Side effects or toxicity                                                                                                                                                                                                          |                                                                                                                                                                                                                                                                                                                                                                                                                                                                                                               |

**leDEA TB SRN**

|                                                                                                                      |                                                                                                                                                                                                                                                                                                                                                                                                                                                                                                                                                                                                                                                                                                                                                                                                                                                                                                                                                                                                                                                                                                                                                       |                                                                                                                                                                                                                                                                                                                                                                                                                                                                                                               |                                                                                                                                                                                                                                                                                                                                                                                                                                                                   |                                                                                                                                                                                                                                                                                                                                                                                                                                                                                                               |
|----------------------------------------------------------------------------------------------------------------------|-------------------------------------------------------------------------------------------------------------------------------------------------------------------------------------------------------------------------------------------------------------------------------------------------------------------------------------------------------------------------------------------------------------------------------------------------------------------------------------------------------------------------------------------------------------------------------------------------------------------------------------------------------------------------------------------------------------------------------------------------------------------------------------------------------------------------------------------------------------------------------------------------------------------------------------------------------------------------------------------------------------------------------------------------------------------------------------------------------------------------------------------------------|---------------------------------------------------------------------------------------------------------------------------------------------------------------------------------------------------------------------------------------------------------------------------------------------------------------------------------------------------------------------------------------------------------------------------------------------------------------------------------------------------------------|-------------------------------------------------------------------------------------------------------------------------------------------------------------------------------------------------------------------------------------------------------------------------------------------------------------------------------------------------------------------------------------------------------------------------------------------------------------------|---------------------------------------------------------------------------------------------------------------------------------------------------------------------------------------------------------------------------------------------------------------------------------------------------------------------------------------------------------------------------------------------------------------------------------------------------------------------------------------------------------------|
| 1<br>2<br>3<br>4<br>5<br>6<br>7<br>8<br>9<br>10                                                                      | <input type="checkbox"/> Incompatibility with ART (antiretroviral treatment)<br><input type="checkbox"/> Drug interaction<br><input type="checkbox"/> Participant stopped taking the meds<br><input type="checkbox"/> Lost to follow up<br><input type="checkbox"/> Dose adjustment (e.g. for weight change)<br><input type="checkbox"/> Death<br><input type="checkbox"/> Other _____<br><input type="checkbox"/> Unknown                                                                                                                                                                                                                                                                                                                                                                                                                                                                                                                                                                                                                                                                                                                            |                                                                                                                                                                                                                                                                                                                                                                                                                                                                                                               |                                                                                                                                                                                                                                                                                                                                                                                                                                                                   |                                                                                                                                                                                                                                                                                                                                                                                                                                                                                                               |
| 11<br>12                                                                                                             | <b>TB Drug 15</b>                                                                                                                                                                                                                                                                                                                                                                                                                                                                                                                                                                                                                                                                                                                                                                                                                                                                                                                                                                                                                                                                                                                                     |                                                                                                                                                                                                                                                                                                                                                                                                                                                                                                               |                                                                                                                                                                                                                                                                                                                                                                                                                                                                   |                                                                                                                                                                                                                                                                                                                                                                                                                                                                                                               |
| 13<br>14<br>15<br>16<br>17<br>18<br>19<br>20<br>21<br>22<br>23<br>24<br>25<br>26<br>27<br>28<br>29<br>30<br>31<br>32 | <table border="1"> <tr> <td>15. TB Drug 15<br/>(Select one)</td> <td> <input type="checkbox"/> RHZE<br/> <input type="checkbox"/> RH<br/> <input type="checkbox"/> Rifampicin<br/> <input type="checkbox"/> Pyrazinamide<br/> <input type="checkbox"/> Isoniazid<br/> <input type="checkbox"/> Ethambutol<br/> <input type="checkbox"/> Streptomycin<br/> <input type="checkbox"/> Rifabutin<br/> <input type="checkbox"/> Amikacin<br/> <input type="checkbox"/> Kanamycin<br/> <input type="checkbox"/> Capreomycin<br/> <input type="checkbox"/> Ofloxacin           </td> <td> <input type="checkbox"/> Levofloxacin<br/> <input type="checkbox"/> Moxifloxacin<br/> <input type="checkbox"/> Terizidone<br/> <input type="checkbox"/> Cycloserine<br/> <input type="checkbox"/> Ethionamide<br/> <input type="checkbox"/> Protionamide<br/> <input type="checkbox"/> Para-aminosalicylic acid (PAS)<br/> <input type="checkbox"/> Clofazimine<br/> <input type="checkbox"/> Linezolid<br/> <input type="checkbox"/> Imipenem<br/> <input type="checkbox"/> Bedaquiline<br/> <input type="checkbox"/> Other: _____           </td> </tr> </table> | 15. TB Drug 15<br>(Select one)                                                                                                                                                                                                                                                                                                                                                                                                                                                                                | <input type="checkbox"/> RHZE<br><input type="checkbox"/> RH<br><input type="checkbox"/> Rifampicin<br><input type="checkbox"/> Pyrazinamide<br><input type="checkbox"/> Isoniazid<br><input type="checkbox"/> Ethambutol<br><input type="checkbox"/> Streptomycin<br><input type="checkbox"/> Rifabutin<br><input type="checkbox"/> Amikacin<br><input type="checkbox"/> Kanamycin<br><input type="checkbox"/> Capreomycin<br><input type="checkbox"/> Ofloxacin | <input type="checkbox"/> Levofloxacin<br><input type="checkbox"/> Moxifloxacin<br><input type="checkbox"/> Terizidone<br><input type="checkbox"/> Cycloserine<br><input type="checkbox"/> Ethionamide<br><input type="checkbox"/> Protionamide<br><input type="checkbox"/> Para-aminosalicylic acid (PAS)<br><input type="checkbox"/> Clofazimine<br><input type="checkbox"/> Linezolid<br><input type="checkbox"/> Imipenem<br><input type="checkbox"/> Bedaquiline<br><input type="checkbox"/> Other: _____ |
| 15. TB Drug 15<br>(Select one)                                                                                       | <input type="checkbox"/> RHZE<br><input type="checkbox"/> RH<br><input type="checkbox"/> Rifampicin<br><input type="checkbox"/> Pyrazinamide<br><input type="checkbox"/> Isoniazid<br><input type="checkbox"/> Ethambutol<br><input type="checkbox"/> Streptomycin<br><input type="checkbox"/> Rifabutin<br><input type="checkbox"/> Amikacin<br><input type="checkbox"/> Kanamycin<br><input type="checkbox"/> Capreomycin<br><input type="checkbox"/> Ofloxacin                                                                                                                                                                                                                                                                                                                                                                                                                                                                                                                                                                                                                                                                                     | <input type="checkbox"/> Levofloxacin<br><input type="checkbox"/> Moxifloxacin<br><input type="checkbox"/> Terizidone<br><input type="checkbox"/> Cycloserine<br><input type="checkbox"/> Ethionamide<br><input type="checkbox"/> Protionamide<br><input type="checkbox"/> Para-aminosalicylic acid (PAS)<br><input type="checkbox"/> Clofazimine<br><input type="checkbox"/> Linezolid<br><input type="checkbox"/> Imipenem<br><input type="checkbox"/> Bedaquiline<br><input type="checkbox"/> Other: _____ |                                                                                                                                                                                                                                                                                                                                                                                                                                                                   |                                                                                                                                                                                                                                                                                                                                                                                                                                                                                                               |
| 33<br>34<br>35<br>36<br>37<br>38                                                                                     | 15a. If RHZE, combination:<br><input type="checkbox"/> RHZE 150/75/400/275 - 2 tablets<br><input type="checkbox"/> RHZE 150/75/400/275 - 3 tablets<br><input type="checkbox"/> RHZE 150/75/400/275 - 4 tablets<br><input type="checkbox"/> RHZE 150/75/400/275 - 5 tablets                                                                                                                                                                                                                                                                                                                                                                                                                                                                                                                                                                                                                                                                                                                                                                                                                                                                            |                                                                                                                                                                                                                                                                                                                                                                                                                                                                                                               |                                                                                                                                                                                                                                                                                                                                                                                                                                                                   |                                                                                                                                                                                                                                                                                                                                                                                                                                                                                                               |
| 39<br>40<br>41<br>42<br>43<br>44<br>45<br>46<br>47                                                                   | 15b. If RH, combination:<br><input type="checkbox"/> RH 150/75 - 2 tablets<br><input type="checkbox"/> RH 150/75 - 3 tablets<br><input type="checkbox"/> RH 150/75 - 4 tablets<br><input type="checkbox"/> RH 150/75 - 5 tablets<br><input type="checkbox"/> RH 300/200 - 1 tablet or capsule<br><input type="checkbox"/> RH 300/200 - 2 tablets or capsules<br><input type="checkbox"/> RH 300/200 - 1 tablet or capsule + RH 150/100 - 1 tablet<br><input type="checkbox"/> RH 300/200 - 2 tablets or capsules + RH 150/100 - 1 tablet                                                                                                                                                                                                                                                                                                                                                                                                                                                                                                                                                                                                              |                                                                                                                                                                                                                                                                                                                                                                                                                                                                                                               |                                                                                                                                                                                                                                                                                                                                                                                                                                                                   |                                                                                                                                                                                                                                                                                                                                                                                                                                                                                                               |
| 48<br>49                                                                                                             | 15c. Other drugs – Dose (mg)<br> _ _ _ _                                                                                                                                                                                                                                                                                                                                                                                                                                                                                                                                                                                                                                                                                                                                                                                                                                                                                                                                                                                                                                                                                                              |                                                                                                                                                                                                                                                                                                                                                                                                                                                                                                               |                                                                                                                                                                                                                                                                                                                                                                                                                                                                   |                                                                                                                                                                                                                                                                                                                                                                                                                                                                                                               |
| 50<br>51<br>52                                                                                                       | 15d. How many times a day is this medication prescribed?<br> _ _ _                                                                                                                                                                                                                                                                                                                                                                                                                                                                                                                                                                                                                                                                                                                                                                                                                                                                                                                                                                                                                                                                                    |                                                                                                                                                                                                                                                                                                                                                                                                                                                                                                               |                                                                                                                                                                                                                                                                                                                                                                                                                                                                   |                                                                                                                                                                                                                                                                                                                                                                                                                                                                                                               |
| 53<br>54<br>55                                                                                                       | 15e. How many days a week is this medication prescribed?<br> _ _ _                                                                                                                                                                                                                                                                                                                                                                                                                                                                                                                                                                                                                                                                                                                                                                                                                                                                                                                                                                                                                                                                                    |                                                                                                                                                                                                                                                                                                                                                                                                                                                                                                               |                                                                                                                                                                                                                                                                                                                                                                                                                                                                   |                                                                                                                                                                                                                                                                                                                                                                                                                                                                                                               |
| 56<br>57<br>58                                                                                                       | 15f. Start Date<br> _ _ / _ _ / _ _ _ _  (dd/mm/yyyy)                                                                                                                                                                                                                                                                                                                                                                                                                                                                                                                                                                                                                                                                                                                                                                                                                                                                                                                                                                                                                                                                                                 |                                                                                                                                                                                                                                                                                                                                                                                                                                                                                                               |                                                                                                                                                                                                                                                                                                                                                                                                                                                                   |                                                                                                                                                                                                                                                                                                                                                                                                                                                                                                               |
| 59<br>60                                                                                                             | 15g. Stop Date<br> _ _ / _ _ / _ _ _ _  (dd/mm/yyyy)                                                                                                                                                                                                                                                                                                                                                                                                                                                                                                                                                                                                                                                                                                                                                                                                                                                                                                                                                                                                                                                                                                  |                                                                                                                                                                                                                                                                                                                                                                                                                                                                                                               |                                                                                                                                                                                                                                                                                                                                                                                                                                                                   |                                                                                                                                                                                                                                                                                                                                                                                                                                                                                                               |

## IeDEA TB SRN

|                                                                                                                                                                                                                                                                                                                                                                                                                                                                   |                                                                                                                                                                                                                                                                                                                                                                                                                                                                                                               |                                                                                                                                                                                                                                                                                                                                                                                                                                                                                                                                                                                                                                                                                                                                                                                                                                                                                                                                                                                                                                                                                                              |                                                                                                                                                                                                                                                                                                                                                                                                                                                                   |                                                                                                                                                                                                                                                                                                                                                                                                                                                                                                               |
|-------------------------------------------------------------------------------------------------------------------------------------------------------------------------------------------------------------------------------------------------------------------------------------------------------------------------------------------------------------------------------------------------------------------------------------------------------------------|---------------------------------------------------------------------------------------------------------------------------------------------------------------------------------------------------------------------------------------------------------------------------------------------------------------------------------------------------------------------------------------------------------------------------------------------------------------------------------------------------------------|--------------------------------------------------------------------------------------------------------------------------------------------------------------------------------------------------------------------------------------------------------------------------------------------------------------------------------------------------------------------------------------------------------------------------------------------------------------------------------------------------------------------------------------------------------------------------------------------------------------------------------------------------------------------------------------------------------------------------------------------------------------------------------------------------------------------------------------------------------------------------------------------------------------------------------------------------------------------------------------------------------------------------------------------------------------------------------------------------------------|-------------------------------------------------------------------------------------------------------------------------------------------------------------------------------------------------------------------------------------------------------------------------------------------------------------------------------------------------------------------------------------------------------------------------------------------------------------------|---------------------------------------------------------------------------------------------------------------------------------------------------------------------------------------------------------------------------------------------------------------------------------------------------------------------------------------------------------------------------------------------------------------------------------------------------------------------------------------------------------------|
| 1<br>2<br>3<br>4<br>5<br>6                                                                                                                                                                                                                                                                                                                                                                                                                                        |                                                                                                                                                                                                                                                                                                                                                                                                                                                                                                               | <input type="checkbox"/> Treatment Ongoing <i>(Return to update the status at next visit. Update stop date and reason once medication is stopped.)</i><br><input type="checkbox"/> Unknown                                                                                                                                                                                                                                                                                                                                                                                                                                                                                                                                                                                                                                                                                                                                                                                                                                                                                                                   |                                                                                                                                                                                                                                                                                                                                                                                                                                                                   |                                                                                                                                                                                                                                                                                                                                                                                                                                                                                                               |
| 7<br>8<br>9<br>10<br>11<br>12<br>13<br>14<br>15<br>16<br>17<br>18<br>19<br>20<br>21<br>22                                                                                                                                                                                                                                                                                                                                                                         | 15h. Reason for change, interruption or completion                                                                                                                                                                                                                                                                                                                                                                                                                                                            | <input type="checkbox"/> Completed intensive phase<br><input type="checkbox"/> Completed continuation phase<br><input type="checkbox"/> TB treatment failure<br><input type="checkbox"/> Drug resistance<br><input type="checkbox"/> Pregnancy<br><input type="checkbox"/> Side effects or toxicity<br><input type="checkbox"/> Incompatibility with ART (antiretroviral treatment)<br><input type="checkbox"/> Drug interaction<br><input type="checkbox"/> Participant stopped taking the meds<br><input type="checkbox"/> Lost to follow up<br><input type="checkbox"/> Dose adjustment (e.g. for weight change)<br><input type="checkbox"/> Death<br><input type="checkbox"/> Other _____<br><input type="checkbox"/> Unknown                                                                                                                                                                                                                                                                                                                                                                            |                                                                                                                                                                                                                                                                                                                                                                                                                                                                   |                                                                                                                                                                                                                                                                                                                                                                                                                                                                                                               |
| 23<br>24                                                                                                                                                                                                                                                                                                                                                                                                                                                          | <b>TB Drug 16</b>                                                                                                                                                                                                                                                                                                                                                                                                                                                                                             |                                                                                                                                                                                                                                                                                                                                                                                                                                                                                                                                                                                                                                                                                                                                                                                                                                                                                                                                                                                                                                                                                                              |                                                                                                                                                                                                                                                                                                                                                                                                                                                                   |                                                                                                                                                                                                                                                                                                                                                                                                                                                                                                               |
| 25<br>26<br>27<br>28<br>29<br>30<br>31<br>32<br>33<br>34<br>35<br>36<br>37<br>38<br>39                                                                                                                                                                                                                                                                                                                                                                            | 16. TB Drug 16<br>(select one)                                                                                                                                                                                                                                                                                                                                                                                                                                                                                | <table border="1"> <tr> <td> <input type="checkbox"/> RHZE<br/> <input type="checkbox"/> RH<br/> <input type="checkbox"/> Rifampicin<br/> <input type="checkbox"/> Pyrazinamide<br/> <input type="checkbox"/> Isoniazid<br/> <input type="checkbox"/> Ethambutol<br/> <input type="checkbox"/> Streptomycin<br/> <input type="checkbox"/> Rifabutin<br/> <input type="checkbox"/> Amikacin<br/> <input type="checkbox"/> Kanamycin<br/> <input type="checkbox"/> Capreomycin<br/> <input type="checkbox"/> Ofloxacin           </td> <td> <input type="checkbox"/> Levofloxacin<br/> <input type="checkbox"/> Moxifloxacin<br/> <input type="checkbox"/> Terizidone<br/> <input type="checkbox"/> Cycloserine<br/> <input type="checkbox"/> Ethionamide<br/> <input type="checkbox"/> Protionamide<br/> <input type="checkbox"/> Para-aminosalicylic acid (PAS)<br/> <input type="checkbox"/> Clofazimine<br/> <input type="checkbox"/> Linezolid<br/> <input type="checkbox"/> Imipenem<br/> <input type="checkbox"/> Bedaquiline<br/> <input type="checkbox"/> Other: _____           </td> </tr> </table> | <input type="checkbox"/> RHZE<br><input type="checkbox"/> RH<br><input type="checkbox"/> Rifampicin<br><input type="checkbox"/> Pyrazinamide<br><input type="checkbox"/> Isoniazid<br><input type="checkbox"/> Ethambutol<br><input type="checkbox"/> Streptomycin<br><input type="checkbox"/> Rifabutin<br><input type="checkbox"/> Amikacin<br><input type="checkbox"/> Kanamycin<br><input type="checkbox"/> Capreomycin<br><input type="checkbox"/> Ofloxacin | <input type="checkbox"/> Levofloxacin<br><input type="checkbox"/> Moxifloxacin<br><input type="checkbox"/> Terizidone<br><input type="checkbox"/> Cycloserine<br><input type="checkbox"/> Ethionamide<br><input type="checkbox"/> Protionamide<br><input type="checkbox"/> Para-aminosalicylic acid (PAS)<br><input type="checkbox"/> Clofazimine<br><input type="checkbox"/> Linezolid<br><input type="checkbox"/> Imipenem<br><input type="checkbox"/> Bedaquiline<br><input type="checkbox"/> Other: _____ |
| <input type="checkbox"/> RHZE<br><input type="checkbox"/> RH<br><input type="checkbox"/> Rifampicin<br><input type="checkbox"/> Pyrazinamide<br><input type="checkbox"/> Isoniazid<br><input type="checkbox"/> Ethambutol<br><input type="checkbox"/> Streptomycin<br><input type="checkbox"/> Rifabutin<br><input type="checkbox"/> Amikacin<br><input type="checkbox"/> Kanamycin<br><input type="checkbox"/> Capreomycin<br><input type="checkbox"/> Ofloxacin | <input type="checkbox"/> Levofloxacin<br><input type="checkbox"/> Moxifloxacin<br><input type="checkbox"/> Terizidone<br><input type="checkbox"/> Cycloserine<br><input type="checkbox"/> Ethionamide<br><input type="checkbox"/> Protionamide<br><input type="checkbox"/> Para-aminosalicylic acid (PAS)<br><input type="checkbox"/> Clofazimine<br><input type="checkbox"/> Linezolid<br><input type="checkbox"/> Imipenem<br><input type="checkbox"/> Bedaquiline<br><input type="checkbox"/> Other: _____ |                                                                                                                                                                                                                                                                                                                                                                                                                                                                                                                                                                                                                                                                                                                                                                                                                                                                                                                                                                                                                                                                                                              |                                                                                                                                                                                                                                                                                                                                                                                                                                                                   |                                                                                                                                                                                                                                                                                                                                                                                                                                                                                                               |
| 40<br>41<br>42<br>43<br>44                                                                                                                                                                                                                                                                                                                                                                                                                                        | 16a. If RHZE, combination:                                                                                                                                                                                                                                                                                                                                                                                                                                                                                    | <input type="checkbox"/> RHZE 150/75/400/275 - 2 tablets<br><input type="checkbox"/> RHZE 150/75/400/275 - 3 tablets<br><input type="checkbox"/> RHZE 150/75/400/275 - 4 tablets<br><input type="checkbox"/> RHZE 150/75/400/275 - 5 tablets                                                                                                                                                                                                                                                                                                                                                                                                                                                                                                                                                                                                                                                                                                                                                                                                                                                                 |                                                                                                                                                                                                                                                                                                                                                                                                                                                                   |                                                                                                                                                                                                                                                                                                                                                                                                                                                                                                               |
| 45<br>46<br>47<br>48<br>49<br>50<br>51<br>52<br>53<br>54                                                                                                                                                                                                                                                                                                                                                                                                          | 16b. If RH, combination:                                                                                                                                                                                                                                                                                                                                                                                                                                                                                      | <input type="checkbox"/> RH 150/75 - 2 tablets<br><input type="checkbox"/> RH 150/75 - 3 tablets<br><input type="checkbox"/> RH 150/75 - 4 tablets<br><input type="checkbox"/> RH 150/75 - 5 tablets<br><input type="checkbox"/> RH 300/200 - 1 tablet or capsule<br><input type="checkbox"/> RH 300/200 - 2 tablets or capsules<br><input type="checkbox"/> RH 300/200 - 1 tablet or capsule + RH 150/100 - 1 tablet<br><input type="checkbox"/> RH 300/200 - 2 tablets or capsules + RH 150/100 - 1 tablet                                                                                                                                                                                                                                                                                                                                                                                                                                                                                                                                                                                                 |                                                                                                                                                                                                                                                                                                                                                                                                                                                                   |                                                                                                                                                                                                                                                                                                                                                                                                                                                                                                               |
| 55<br>56                                                                                                                                                                                                                                                                                                                                                                                                                                                          | 16c. Other drugs - Dose (mg)                                                                                                                                                                                                                                                                                                                                                                                                                                                                                  | <table border="1"> <tr> <td> <input type="text"/> <input type="text"/> <input type="text"/> <input type="text"/> <input type="text"/> </td> </tr> </table>                                                                                                                                                                                                                                                                                                                                                                                                                                                                                                                                                                                                                                                                                                                                                                                                                                                                                                                                                   | <input type="text"/> <input type="text"/> <input type="text"/> <input type="text"/> <input type="text"/>                                                                                                                                                                                                                                                                                                                                                          |                                                                                                                                                                                                                                                                                                                                                                                                                                                                                                               |
| <input type="text"/> <input type="text"/> <input type="text"/> <input type="text"/> <input type="text"/>                                                                                                                                                                                                                                                                                                                                                          |                                                                                                                                                                                                                                                                                                                                                                                                                                                                                                               |                                                                                                                                                                                                                                                                                                                                                                                                                                                                                                                                                                                                                                                                                                                                                                                                                                                                                                                                                                                                                                                                                                              |                                                                                                                                                                                                                                                                                                                                                                                                                                                                   |                                                                                                                                                                                                                                                                                                                                                                                                                                                                                                               |
| 57<br>58<br>59<br>60                                                                                                                                                                                                                                                                                                                                                                                                                                              | 16d. How many times a day is this medication prescribed?                                                                                                                                                                                                                                                                                                                                                                                                                                                      | <table border="1"> <tr> <td> <input type="text"/> <input type="text"/> <input type="text"/> <input type="text"/> </td> </tr> </table>                                                                                                                                                                                                                                                                                                                                                                                                                                                                                                                                                                                                                                                                                                                                                                                                                                                                                                                                                                        | <input type="text"/> <input type="text"/> <input type="text"/> <input type="text"/>                                                                                                                                                                                                                                                                                                                                                                               |                                                                                                                                                                                                                                                                                                                                                                                                                                                                                                               |
| <input type="text"/> <input type="text"/> <input type="text"/> <input type="text"/>                                                                                                                                                                                                                                                                                                                                                                               |                                                                                                                                                                                                                                                                                                                                                                                                                                                                                                               |                                                                                                                                                                                                                                                                                                                                                                                                                                                                                                                                                                                                                                                                                                                                                                                                                                                                                                                                                                                                                                                                                                              |                                                                                                                                                                                                                                                                                                                                                                                                                                                                   |                                                                                                                                                                                                                                                                                                                                                                                                                                                                                                               |

|                                                                                                                                                                                                                                                                                                                                                                                                                                                                   |                                                                                                                                                                                                                                                                                                                                                                                                                                                                                                               |                                                                                                                                                                                                                                                                                                                                                                                                                                                                                                                                                                                                                                                                                                                                                                                                                                                                                                                                                                                                                                                                                                                                                  |  |                                                                                                                                                                                                                                                                                                                                                                                                                                                                   |                                                                                                                                                                                                                                                                                                                                                                                                                                                                                                               |
|-------------------------------------------------------------------------------------------------------------------------------------------------------------------------------------------------------------------------------------------------------------------------------------------------------------------------------------------------------------------------------------------------------------------------------------------------------------------|---------------------------------------------------------------------------------------------------------------------------------------------------------------------------------------------------------------------------------------------------------------------------------------------------------------------------------------------------------------------------------------------------------------------------------------------------------------------------------------------------------------|--------------------------------------------------------------------------------------------------------------------------------------------------------------------------------------------------------------------------------------------------------------------------------------------------------------------------------------------------------------------------------------------------------------------------------------------------------------------------------------------------------------------------------------------------------------------------------------------------------------------------------------------------------------------------------------------------------------------------------------------------------------------------------------------------------------------------------------------------------------------------------------------------------------------------------------------------------------------------------------------------------------------------------------------------------------------------------------------------------------------------------------------------|--|-------------------------------------------------------------------------------------------------------------------------------------------------------------------------------------------------------------------------------------------------------------------------------------------------------------------------------------------------------------------------------------------------------------------------------------------------------------------|---------------------------------------------------------------------------------------------------------------------------------------------------------------------------------------------------------------------------------------------------------------------------------------------------------------------------------------------------------------------------------------------------------------------------------------------------------------------------------------------------------------|
| 1<br>2<br>3<br>4                                                                                                                                                                                                                                                                                                                                                                                                                                                  | 16e. How many days a week is this medication prescribed?                                                                                                                                                                                                                                                                                                                                                                                                                                                      | _ _ _ _                                                                                                                                                                                                                                                                                                                                                                                                                                                                                                                                                                                                                                                                                                                                                                                                                                                                                                                                                                                                                                                                                                                                          |  |                                                                                                                                                                                                                                                                                                                                                                                                                                                                   |                                                                                                                                                                                                                                                                                                                                                                                                                                                                                                               |
| 5<br>6<br>7                                                                                                                                                                                                                                                                                                                                                                                                                                                       | 16f. Start Date                                                                                                                                                                                                                                                                                                                                                                                                                                                                                               | _ _ _ / _ _ _ / _ _ _ _ _  (dd/mm/yyyy)                                                                                                                                                                                                                                                                                                                                                                                                                                                                                                                                                                                                                                                                                                                                                                                                                                                                                                                                                                                                                                                                                                          |  |                                                                                                                                                                                                                                                                                                                                                                                                                                                                   |                                                                                                                                                                                                                                                                                                                                                                                                                                                                                                               |
| 8<br>9<br>10<br>11<br>12<br>13<br>14                                                                                                                                                                                                                                                                                                                                                                                                                              | 16g. Stop Date                                                                                                                                                                                                                                                                                                                                                                                                                                                                                                | _ _ _ / _ _ _ / _ _ _ _ _  (dd/mm/yyyy)                                                                                                                                                                                                                                                                                                                                                                                                                                                                                                                                                                                                                                                                                                                                                                                                                                                                                                                                                                                                                                                                                                          |  |                                                                                                                                                                                                                                                                                                                                                                                                                                                                   |                                                                                                                                                                                                                                                                                                                                                                                                                                                                                                               |
|                                                                                                                                                                                                                                                                                                                                                                                                                                                                   |                                                                                                                                                                                                                                                                                                                                                                                                                                                                                                               | <input type="checkbox"/> Treatment Ongoing ( <i>Return to update the status at next visit. Update stop date and reason once medication is stopped.</i> )<br><input type="checkbox"/> Unknown                                                                                                                                                                                                                                                                                                                                                                                                                                                                                                                                                                                                                                                                                                                                                                                                                                                                                                                                                     |  |                                                                                                                                                                                                                                                                                                                                                                                                                                                                   |                                                                                                                                                                                                                                                                                                                                                                                                                                                                                                               |
| 15<br>16<br>17<br>18<br>19<br>20<br>21<br>22<br>23<br>24<br>25<br>26<br>27<br>28<br>29<br>30                                                                                                                                                                                                                                                                                                                                                                      | 16h. Reason for change, interruption or completion                                                                                                                                                                                                                                                                                                                                                                                                                                                            | <input type="checkbox"/> Completed intensive phase<br><input type="checkbox"/> Completed continuation phase<br><input type="checkbox"/> TB treatment failure<br><input type="checkbox"/> Drug resistance<br><input type="checkbox"/> Pregnancy<br><input type="checkbox"/> Side effects or toxicity<br><input type="checkbox"/> Incompatibility with ART (antiretroviral treatment)<br><input type="checkbox"/> Drug interaction<br><input type="checkbox"/> Participant stopped taking the meds<br><input type="checkbox"/> Lost to follow up<br><input type="checkbox"/> Dose adjustment (e.g. for weight change)<br><input type="checkbox"/> Death<br><input type="checkbox"/> Other _____<br><input type="checkbox"/> Unknown                                                                                                                                                                                                                                                                                                                                                                                                                |  |                                                                                                                                                                                                                                                                                                                                                                                                                                                                   |                                                                                                                                                                                                                                                                                                                                                                                                                                                                                                               |
| 31<br>32                                                                                                                                                                                                                                                                                                                                                                                                                                                          | <b>TB Drug 17</b>                                                                                                                                                                                                                                                                                                                                                                                                                                                                                             |                                                                                                                                                                                                                                                                                                                                                                                                                                                                                                                                                                                                                                                                                                                                                                                                                                                                                                                                                                                                                                                                                                                                                  |  |                                                                                                                                                                                                                                                                                                                                                                                                                                                                   |                                                                                                                                                                                                                                                                                                                                                                                                                                                                                                               |
| 33<br>34<br>35<br>36<br>37<br>38<br>39<br>40<br>41<br>42<br>43<br>44<br>45<br>46<br>47<br>48                                                                                                                                                                                                                                                                                                                                                                      | 17. TB Drug 17<br>(Select one)                                                                                                                                                                                                                                                                                                                                                                                                                                                                                | <table border="1"> <tr> <td> <input type="checkbox"/> RHZE<br/> <input type="checkbox"/> RH<br/> <input type="checkbox"/> Rifampicin<br/> <input type="checkbox"/> Pyrazinamide<br/> <input type="checkbox"/> Isoniazid<br/> <input type="checkbox"/> Ethambutol<br/> <input type="checkbox"/> Streptomycin<br/> <input type="checkbox"/> Rifabutin<br/> <input type="checkbox"/> Amikacin<br/> <input type="checkbox"/> Kanamycin<br/> <input type="checkbox"/> Capreomycin<br/> <input type="checkbox"/> Ofloxacin                             </td> <td> <input type="checkbox"/> Levofloxacin<br/> <input type="checkbox"/> Moxifloxacin<br/> <input type="checkbox"/> Terizidone<br/> <input type="checkbox"/> Cycloserine<br/> <input type="checkbox"/> Ethionamide<br/> <input type="checkbox"/> Protionamide<br/> <input type="checkbox"/> Para-aminosalicylic acid (PAS)<br/> <input type="checkbox"/> Clofazimine<br/> <input type="checkbox"/> Linezolid<br/> <input type="checkbox"/> Imipenem<br/> <input type="checkbox"/> Bedaquiline<br/> <input type="checkbox"/> Other: _____                             </td> </tr> </table> |  | <input type="checkbox"/> RHZE<br><input type="checkbox"/> RH<br><input type="checkbox"/> Rifampicin<br><input type="checkbox"/> Pyrazinamide<br><input type="checkbox"/> Isoniazid<br><input type="checkbox"/> Ethambutol<br><input type="checkbox"/> Streptomycin<br><input type="checkbox"/> Rifabutin<br><input type="checkbox"/> Amikacin<br><input type="checkbox"/> Kanamycin<br><input type="checkbox"/> Capreomycin<br><input type="checkbox"/> Ofloxacin | <input type="checkbox"/> Levofloxacin<br><input type="checkbox"/> Moxifloxacin<br><input type="checkbox"/> Terizidone<br><input type="checkbox"/> Cycloserine<br><input type="checkbox"/> Ethionamide<br><input type="checkbox"/> Protionamide<br><input type="checkbox"/> Para-aminosalicylic acid (PAS)<br><input type="checkbox"/> Clofazimine<br><input type="checkbox"/> Linezolid<br><input type="checkbox"/> Imipenem<br><input type="checkbox"/> Bedaquiline<br><input type="checkbox"/> Other: _____ |
| <input type="checkbox"/> RHZE<br><input type="checkbox"/> RH<br><input type="checkbox"/> Rifampicin<br><input type="checkbox"/> Pyrazinamide<br><input type="checkbox"/> Isoniazid<br><input type="checkbox"/> Ethambutol<br><input type="checkbox"/> Streptomycin<br><input type="checkbox"/> Rifabutin<br><input type="checkbox"/> Amikacin<br><input type="checkbox"/> Kanamycin<br><input type="checkbox"/> Capreomycin<br><input type="checkbox"/> Ofloxacin | <input type="checkbox"/> Levofloxacin<br><input type="checkbox"/> Moxifloxacin<br><input type="checkbox"/> Terizidone<br><input type="checkbox"/> Cycloserine<br><input type="checkbox"/> Ethionamide<br><input type="checkbox"/> Protionamide<br><input type="checkbox"/> Para-aminosalicylic acid (PAS)<br><input type="checkbox"/> Clofazimine<br><input type="checkbox"/> Linezolid<br><input type="checkbox"/> Imipenem<br><input type="checkbox"/> Bedaquiline<br><input type="checkbox"/> Other: _____ |                                                                                                                                                                                                                                                                                                                                                                                                                                                                                                                                                                                                                                                                                                                                                                                                                                                                                                                                                                                                                                                                                                                                                  |  |                                                                                                                                                                                                                                                                                                                                                                                                                                                                   |                                                                                                                                                                                                                                                                                                                                                                                                                                                                                                               |
| 49<br>50<br>51<br>52<br>53                                                                                                                                                                                                                                                                                                                                                                                                                                        | 17a. If RHZE, combination:                                                                                                                                                                                                                                                                                                                                                                                                                                                                                    | <input type="checkbox"/> RHZE 150/75/400/275 - 2 tablets<br><input type="checkbox"/> RHZE 150/75/400/275 - 3 tablets<br><input type="checkbox"/> RHZE 150/75/400/275 - 4 tablets<br><input type="checkbox"/> RHZE 150/75/400/275 - 5 tablets                                                                                                                                                                                                                                                                                                                                                                                                                                                                                                                                                                                                                                                                                                                                                                                                                                                                                                     |  |                                                                                                                                                                                                                                                                                                                                                                                                                                                                   |                                                                                                                                                                                                                                                                                                                                                                                                                                                                                                               |
| 54<br>55<br>56<br>57<br>58<br>59<br>60                                                                                                                                                                                                                                                                                                                                                                                                                            | 17b. If RH, combination:                                                                                                                                                                                                                                                                                                                                                                                                                                                                                      | <input type="checkbox"/> RH 150/75 - 2 tablets<br><input type="checkbox"/> RH 150/75 - 3 tablets<br><input type="checkbox"/> RH 150/75 - 4 tablets<br><input type="checkbox"/> RH 150/75 - 5 tablets<br><input type="checkbox"/> RH 300/200 - 1 tablet or capsule<br><input type="checkbox"/> RH 300/200 - 2 tablets or capsules<br><input type="checkbox"/> RH 300/200 - 1 tablet or capsule + RH 150/100 - 1 tablet                                                                                                                                                                                                                                                                                                                                                                                                                                                                                                                                                                                                                                                                                                                            |  |                                                                                                                                                                                                                                                                                                                                                                                                                                                                   |                                                                                                                                                                                                                                                                                                                                                                                                                                                                                                               |

|                                       |                                                          |                                                                                                                                                                                                                                                                                                                                                                                                                                                                                                                                                                                                                                                                                                                                                                                                                                                                                                                                                                                                                                                                                                                                                                                                                                                                                                       |                               |                                       |                             |                                       |                                     |                                     |                                       |                                      |                                    |                                      |                                     |                                       |                                       |                                                         |                                    |                                      |                                   |                                    |                                    |                                   |                                      |                                      |                                    |                                       |
|---------------------------------------|----------------------------------------------------------|-------------------------------------------------------------------------------------------------------------------------------------------------------------------------------------------------------------------------------------------------------------------------------------------------------------------------------------------------------------------------------------------------------------------------------------------------------------------------------------------------------------------------------------------------------------------------------------------------------------------------------------------------------------------------------------------------------------------------------------------------------------------------------------------------------------------------------------------------------------------------------------------------------------------------------------------------------------------------------------------------------------------------------------------------------------------------------------------------------------------------------------------------------------------------------------------------------------------------------------------------------------------------------------------------------|-------------------------------|---------------------------------------|-----------------------------|---------------------------------------|-------------------------------------|-------------------------------------|---------------------------------------|--------------------------------------|------------------------------------|--------------------------------------|-------------------------------------|---------------------------------------|---------------------------------------|---------------------------------------------------------|------------------------------------|--------------------------------------|-----------------------------------|------------------------------------|------------------------------------|-----------------------------------|--------------------------------------|--------------------------------------|------------------------------------|---------------------------------------|
| 1                                     |                                                          | <input type="checkbox"/> RH 300/200 - 2 tablets or capsules + RH 150/100 - 1 tablet                                                                                                                                                                                                                                                                                                                                                                                                                                                                                                                                                                                                                                                                                                                                                                                                                                                                                                                                                                                                                                                                                                                                                                                                                   |                               |                                       |                             |                                       |                                     |                                     |                                       |                                      |                                    |                                      |                                     |                                       |                                       |                                                         |                                    |                                      |                                   |                                    |                                    |                                   |                                      |                                      |                                    |                                       |
| 2                                     |                                                          |                                                                                                                                                                                                                                                                                                                                                                                                                                                                                                                                                                                                                                                                                                                                                                                                                                                                                                                                                                                                                                                                                                                                                                                                                                                                                                       |                               |                                       |                             |                                       |                                     |                                     |                                       |                                      |                                    |                                      |                                     |                                       |                                       |                                                         |                                    |                                      |                                   |                                    |                                    |                                   |                                      |                                      |                                    |                                       |
| 3                                     |                                                          |                                                                                                                                                                                                                                                                                                                                                                                                                                                                                                                                                                                                                                                                                                                                                                                                                                                                                                                                                                                                                                                                                                                                                                                                                                                                                                       |                               |                                       |                             |                                       |                                     |                                     |                                       |                                      |                                    |                                      |                                     |                                       |                                       |                                                         |                                    |                                      |                                   |                                    |                                    |                                   |                                      |                                      |                                    |                                       |
| 4                                     | 17c. Other drugs - Dose (mg)                             | _ _ _ _                                                                                                                                                                                                                                                                                                                                                                                                                                                                                                                                                                                                                                                                                                                                                                                                                                                                                                                                                                                                                                                                                                                                                                                                                                                                                               |                               |                                       |                             |                                       |                                     |                                     |                                       |                                      |                                    |                                      |                                     |                                       |                                       |                                                         |                                    |                                      |                                   |                                    |                                    |                                   |                                      |                                      |                                    |                                       |
| 5                                     |                                                          |                                                                                                                                                                                                                                                                                                                                                                                                                                                                                                                                                                                                                                                                                                                                                                                                                                                                                                                                                                                                                                                                                                                                                                                                                                                                                                       |                               |                                       |                             |                                       |                                     |                                     |                                       |                                      |                                    |                                      |                                     |                                       |                                       |                                                         |                                    |                                      |                                   |                                    |                                    |                                   |                                      |                                      |                                    |                                       |
| 6                                     | 17d. How many times a day is this medication prescribed? | _ _ _                                                                                                                                                                                                                                                                                                                                                                                                                                                                                                                                                                                                                                                                                                                                                                                                                                                                                                                                                                                                                                                                                                                                                                                                                                                                                                 |                               |                                       |                             |                                       |                                     |                                     |                                       |                                      |                                    |                                      |                                     |                                       |                                       |                                                         |                                    |                                      |                                   |                                    |                                    |                                   |                                      |                                      |                                    |                                       |
| 7                                     |                                                          |                                                                                                                                                                                                                                                                                                                                                                                                                                                                                                                                                                                                                                                                                                                                                                                                                                                                                                                                                                                                                                                                                                                                                                                                                                                                                                       |                               |                                       |                             |                                       |                                     |                                     |                                       |                                      |                                    |                                      |                                     |                                       |                                       |                                                         |                                    |                                      |                                   |                                    |                                    |                                   |                                      |                                      |                                    |                                       |
| 8                                     |                                                          |                                                                                                                                                                                                                                                                                                                                                                                                                                                                                                                                                                                                                                                                                                                                                                                                                                                                                                                                                                                                                                                                                                                                                                                                                                                                                                       |                               |                                       |                             |                                       |                                     |                                     |                                       |                                      |                                    |                                      |                                     |                                       |                                       |                                                         |                                    |                                      |                                   |                                    |                                    |                                   |                                      |                                      |                                    |                                       |
| 9                                     | 17e. How many days a week is this medication prescribed? | _ _ _                                                                                                                                                                                                                                                                                                                                                                                                                                                                                                                                                                                                                                                                                                                                                                                                                                                                                                                                                                                                                                                                                                                                                                                                                                                                                                 |                               |                                       |                             |                                       |                                     |                                     |                                       |                                      |                                    |                                      |                                     |                                       |                                       |                                                         |                                    |                                      |                                   |                                    |                                    |                                   |                                      |                                      |                                    |                                       |
| 10                                    |                                                          |                                                                                                                                                                                                                                                                                                                                                                                                                                                                                                                                                                                                                                                                                                                                                                                                                                                                                                                                                                                                                                                                                                                                                                                                                                                                                                       |                               |                                       |                             |                                       |                                     |                                     |                                       |                                      |                                    |                                      |                                     |                                       |                                       |                                                         |                                    |                                      |                                   |                                    |                                    |                                   |                                      |                                      |                                    |                                       |
| 11                                    |                                                          |                                                                                                                                                                                                                                                                                                                                                                                                                                                                                                                                                                                                                                                                                                                                                                                                                                                                                                                                                                                                                                                                                                                                                                                                                                                                                                       |                               |                                       |                             |                                       |                                     |                                     |                                       |                                      |                                    |                                      |                                     |                                       |                                       |                                                         |                                    |                                      |                                   |                                    |                                    |                                   |                                      |                                      |                                    |                                       |
| 12                                    | 17f. Start Date                                          | _ _ / _ _ / _ _ _ _  (dd/mm/yyyy)                                                                                                                                                                                                                                                                                                                                                                                                                                                                                                                                                                                                                                                                                                                                                                                                                                                                                                                                                                                                                                                                                                                                                                                                                                                                     |                               |                                       |                             |                                       |                                     |                                     |                                       |                                      |                                    |                                      |                                     |                                       |                                       |                                                         |                                    |                                      |                                   |                                    |                                    |                                   |                                      |                                      |                                    |                                       |
| 13                                    |                                                          |                                                                                                                                                                                                                                                                                                                                                                                                                                                                                                                                                                                                                                                                                                                                                                                                                                                                                                                                                                                                                                                                                                                                                                                                                                                                                                       |                               |                                       |                             |                                       |                                     |                                     |                                       |                                      |                                    |                                      |                                     |                                       |                                       |                                                         |                                    |                                      |                                   |                                    |                                    |                                   |                                      |                                      |                                    |                                       |
| 14                                    | 17g. Stop Date                                           | _ _ / _ _ / _ _ _ _  (dd/mm/yyyy)                                                                                                                                                                                                                                                                                                                                                                                                                                                                                                                                                                                                                                                                                                                                                                                                                                                                                                                                                                                                                                                                                                                                                                                                                                                                     |                               |                                       |                             |                                       |                                     |                                     |                                       |                                      |                                    |                                      |                                     |                                       |                                       |                                                         |                                    |                                      |                                   |                                    |                                    |                                   |                                      |                                      |                                    |                                       |
| 15                                    |                                                          |                                                                                                                                                                                                                                                                                                                                                                                                                                                                                                                                                                                                                                                                                                                                                                                                                                                                                                                                                                                                                                                                                                                                                                                                                                                                                                       |                               |                                       |                             |                                       |                                     |                                     |                                       |                                      |                                    |                                      |                                     |                                       |                                       |                                                         |                                    |                                      |                                   |                                    |                                    |                                   |                                      |                                      |                                    |                                       |
| 16                                    |                                                          | <input type="checkbox"/> Treatment Ongoing (Return to update the status at next visit. Update stop date and reason once medication is stopped.)                                                                                                                                                                                                                                                                                                                                                                                                                                                                                                                                                                                                                                                                                                                                                                                                                                                                                                                                                                                                                                                                                                                                                       |                               |                                       |                             |                                       |                                     |                                     |                                       |                                      |                                    |                                      |                                     |                                       |                                       |                                                         |                                    |                                      |                                   |                                    |                                    |                                   |                                      |                                      |                                    |                                       |
| 17                                    |                                                          | <input type="checkbox"/> Unknown                                                                                                                                                                                                                                                                                                                                                                                                                                                                                                                                                                                                                                                                                                                                                                                                                                                                                                                                                                                                                                                                                                                                                                                                                                                                      |                               |                                       |                             |                                       |                                     |                                     |                                       |                                      |                                    |                                      |                                     |                                       |                                       |                                                         |                                    |                                      |                                   |                                    |                                    |                                   |                                      |                                      |                                    |                                       |
| 18                                    |                                                          |                                                                                                                                                                                                                                                                                                                                                                                                                                                                                                                                                                                                                                                                                                                                                                                                                                                                                                                                                                                                                                                                                                                                                                                                                                                                                                       |                               |                                       |                             |                                       |                                     |                                     |                                       |                                      |                                    |                                      |                                     |                                       |                                       |                                                         |                                    |                                      |                                   |                                    |                                    |                                   |                                      |                                      |                                    |                                       |
| 19                                    |                                                          |                                                                                                                                                                                                                                                                                                                                                                                                                                                                                                                                                                                                                                                                                                                                                                                                                                                                                                                                                                                                                                                                                                                                                                                                                                                                                                       |                               |                                       |                             |                                       |                                     |                                     |                                       |                                      |                                    |                                      |                                     |                                       |                                       |                                                         |                                    |                                      |                                   |                                    |                                    |                                   |                                      |                                      |                                    |                                       |
| 20                                    |                                                          |                                                                                                                                                                                                                                                                                                                                                                                                                                                                                                                                                                                                                                                                                                                                                                                                                                                                                                                                                                                                                                                                                                                                                                                                                                                                                                       |                               |                                       |                             |                                       |                                     |                                     |                                       |                                      |                                    |                                      |                                     |                                       |                                       |                                                         |                                    |                                      |                                   |                                    |                                    |                                   |                                      |                                      |                                    |                                       |
| 21                                    | 17h. Reason for change, interruption or completion       | <input type="checkbox"/> Completed intensive phase<br><input type="checkbox"/> Completed continuation phase<br><input type="checkbox"/> TB treatment failure<br><input type="checkbox"/> Drug resistance<br><input type="checkbox"/> Pregnancy<br><input type="checkbox"/> Side effects or toxicity<br><input type="checkbox"/> Incompatibility with ART (antiretroviral treatment)<br><input type="checkbox"/> Drug interaction<br><input type="checkbox"/> Participant stopped taking the meds<br><input type="checkbox"/> Lost to follow up<br><input type="checkbox"/> Dose adjustment (e.g. for weight change)<br><input type="checkbox"/> Death<br><input type="checkbox"/> Other _____<br><input type="checkbox"/> Unknown                                                                                                                                                                                                                                                                                                                                                                                                                                                                                                                                                                     |                               |                                       |                             |                                       |                                     |                                     |                                       |                                      |                                    |                                      |                                     |                                       |                                       |                                                         |                                    |                                      |                                   |                                    |                                    |                                   |                                      |                                      |                                    |                                       |
| 22                                    |                                                          |                                                                                                                                                                                                                                                                                                                                                                                                                                                                                                                                                                                                                                                                                                                                                                                                                                                                                                                                                                                                                                                                                                                                                                                                                                                                                                       |                               |                                       |                             |                                       |                                     |                                     |                                       |                                      |                                    |                                      |                                     |                                       |                                       |                                                         |                                    |                                      |                                   |                                    |                                    |                                   |                                      |                                      |                                    |                                       |
| 23                                    |                                                          |                                                                                                                                                                                                                                                                                                                                                                                                                                                                                                                                                                                                                                                                                                                                                                                                                                                                                                                                                                                                                                                                                                                                                                                                                                                                                                       |                               |                                       |                             |                                       |                                     |                                     |                                       |                                      |                                    |                                      |                                     |                                       |                                       |                                                         |                                    |                                      |                                   |                                    |                                    |                                   |                                      |                                      |                                    |                                       |
| 24                                    |                                                          |                                                                                                                                                                                                                                                                                                                                                                                                                                                                                                                                                                                                                                                                                                                                                                                                                                                                                                                                                                                                                                                                                                                                                                                                                                                                                                       |                               |                                       |                             |                                       |                                     |                                     |                                       |                                      |                                    |                                      |                                     |                                       |                                       |                                                         |                                    |                                      |                                   |                                    |                                    |                                   |                                      |                                      |                                    |                                       |
| 25                                    |                                                          |                                                                                                                                                                                                                                                                                                                                                                                                                                                                                                                                                                                                                                                                                                                                                                                                                                                                                                                                                                                                                                                                                                                                                                                                                                                                                                       |                               |                                       |                             |                                       |                                     |                                     |                                       |                                      |                                    |                                      |                                     |                                       |                                       |                                                         |                                    |                                      |                                   |                                    |                                    |                                   |                                      |                                      |                                    |                                       |
| 26                                    |                                                          |                                                                                                                                                                                                                                                                                                                                                                                                                                                                                                                                                                                                                                                                                                                                                                                                                                                                                                                                                                                                                                                                                                                                                                                                                                                                                                       |                               |                                       |                             |                                       |                                     |                                     |                                       |                                      |                                    |                                      |                                     |                                       |                                       |                                                         |                                    |                                      |                                   |                                    |                                    |                                   |                                      |                                      |                                    |                                       |
| 27                                    |                                                          |                                                                                                                                                                                                                                                                                                                                                                                                                                                                                                                                                                                                                                                                                                                                                                                                                                                                                                                                                                                                                                                                                                                                                                                                                                                                                                       |                               |                                       |                             |                                       |                                     |                                     |                                       |                                      |                                    |                                      |                                     |                                       |                                       |                                                         |                                    |                                      |                                   |                                    |                                    |                                   |                                      |                                      |                                    |                                       |
| 28                                    |                                                          |                                                                                                                                                                                                                                                                                                                                                                                                                                                                                                                                                                                                                                                                                                                                                                                                                                                                                                                                                                                                                                                                                                                                                                                                                                                                                                       |                               |                                       |                             |                                       |                                     |                                     |                                       |                                      |                                    |                                      |                                     |                                       |                                       |                                                         |                                    |                                      |                                   |                                    |                                    |                                   |                                      |                                      |                                    |                                       |
| 29                                    |                                                          |                                                                                                                                                                                                                                                                                                                                                                                                                                                                                                                                                                                                                                                                                                                                                                                                                                                                                                                                                                                                                                                                                                                                                                                                                                                                                                       |                               |                                       |                             |                                       |                                     |                                     |                                       |                                      |                                    |                                      |                                     |                                       |                                       |                                                         |                                    |                                      |                                   |                                    |                                    |                                   |                                      |                                      |                                    |                                       |
| 30                                    |                                                          |                                                                                                                                                                                                                                                                                                                                                                                                                                                                                                                                                                                                                                                                                                                                                                                                                                                                                                                                                                                                                                                                                                                                                                                                                                                                                                       |                               |                                       |                             |                                       |                                     |                                     |                                       |                                      |                                    |                                      |                                     |                                       |                                       |                                                         |                                    |                                      |                                   |                                    |                                    |                                   |                                      |                                      |                                    |                                       |
| 31                                    |                                                          |                                                                                                                                                                                                                                                                                                                                                                                                                                                                                                                                                                                                                                                                                                                                                                                                                                                                                                                                                                                                                                                                                                                                                                                                                                                                                                       |                               |                                       |                             |                                       |                                     |                                     |                                       |                                      |                                    |                                      |                                     |                                       |                                       |                                                         |                                    |                                      |                                   |                                    |                                    |                                   |                                      |                                      |                                    |                                       |
| 32                                    |                                                          |                                                                                                                                                                                                                                                                                                                                                                                                                                                                                                                                                                                                                                                                                                                                                                                                                                                                                                                                                                                                                                                                                                                                                                                                                                                                                                       |                               |                                       |                             |                                       |                                     |                                     |                                       |                                      |                                    |                                      |                                     |                                       |                                       |                                                         |                                    |                                      |                                   |                                    |                                    |                                   |                                      |                                      |                                    |                                       |
| 33                                    |                                                          |                                                                                                                                                                                                                                                                                                                                                                                                                                                                                                                                                                                                                                                                                                                                                                                                                                                                                                                                                                                                                                                                                                                                                                                                                                                                                                       |                               |                                       |                             |                                       |                                     |                                     |                                       |                                      |                                    |                                      |                                     |                                       |                                       |                                                         |                                    |                                      |                                   |                                    |                                    |                                   |                                      |                                      |                                    |                                       |
| 34                                    |                                                          |                                                                                                                                                                                                                                                                                                                                                                                                                                                                                                                                                                                                                                                                                                                                                                                                                                                                                                                                                                                                                                                                                                                                                                                                                                                                                                       |                               |                                       |                             |                                       |                                     |                                     |                                       |                                      |                                    |                                      |                                     |                                       |                                       |                                                         |                                    |                                      |                                   |                                    |                                    |                                   |                                      |                                      |                                    |                                       |
| 35                                    |                                                          |                                                                                                                                                                                                                                                                                                                                                                                                                                                                                                                                                                                                                                                                                                                                                                                                                                                                                                                                                                                                                                                                                                                                                                                                                                                                                                       |                               |                                       |                             |                                       |                                     |                                     |                                       |                                      |                                    |                                      |                                     |                                       |                                       |                                                         |                                    |                                      |                                   |                                    |                                    |                                   |                                      |                                      |                                    |                                       |
| 36                                    |                                                          |                                                                                                                                                                                                                                                                                                                                                                                                                                                                                                                                                                                                                                                                                                                                                                                                                                                                                                                                                                                                                                                                                                                                                                                                                                                                                                       |                               |                                       |                             |                                       |                                     |                                     |                                       |                                      |                                    |                                      |                                     |                                       |                                       |                                                         |                                    |                                      |                                   |                                    |                                    |                                   |                                      |                                      |                                    |                                       |
| 37                                    |                                                          |                                                                                                                                                                                                                                                                                                                                                                                                                                                                                                                                                                                                                                                                                                                                                                                                                                                                                                                                                                                                                                                                                                                                                                                                                                                                                                       |                               |                                       |                             |                                       |                                     |                                     |                                       |                                      |                                    |                                      |                                     |                                       |                                       |                                                         |                                    |                                      |                                   |                                    |                                    |                                   |                                      |                                      |                                    |                                       |
| 38                                    | <b>TB Drug 18</b>                                        |                                                                                                                                                                                                                                                                                                                                                                                                                                                                                                                                                                                                                                                                                                                                                                                                                                                                                                                                                                                                                                                                                                                                                                                                                                                                                                       |                               |                                       |                             |                                       |                                     |                                     |                                       |                                      |                                    |                                      |                                     |                                       |                                       |                                                         |                                    |                                      |                                   |                                    |                                    |                                   |                                      |                                      |                                    |                                       |
| 39                                    |                                                          |                                                                                                                                                                                                                                                                                                                                                                                                                                                                                                                                                                                                                                                                                                                                                                                                                                                                                                                                                                                                                                                                                                                                                                                                                                                                                                       |                               |                                       |                             |                                       |                                     |                                     |                                       |                                      |                                    |                                      |                                     |                                       |                                       |                                                         |                                    |                                      |                                   |                                    |                                    |                                   |                                      |                                      |                                    |                                       |
| 40                                    | 18. TB Drug 18<br>(Select one)                           | <table border="1"> <tr> <td><input type="checkbox"/> RHZE</td> <td><input type="checkbox"/> Levofloxacin</td> </tr> <tr> <td><input type="checkbox"/> RH</td> <td><input type="checkbox"/> Moxifloxacin</td> </tr> <tr> <td><input type="checkbox"/> Rifampicin</td> <td><input type="checkbox"/> Terizidone</td> </tr> <tr> <td><input type="checkbox"/> Pyrazinamide</td> <td><input type="checkbox"/> Cycloserine</td> </tr> <tr> <td><input type="checkbox"/> Isoniazid</td> <td><input type="checkbox"/> Ethionamide</td> </tr> <tr> <td><input type="checkbox"/> Ethambutol</td> <td><input type="checkbox"/> Protionamide</td> </tr> <tr> <td><input type="checkbox"/> Streptomycin</td> <td><input type="checkbox"/> Para-aminosalicylic acid (PAS)</td> </tr> <tr> <td><input type="checkbox"/> Rifabutin</td> <td><input type="checkbox"/> Clofazimine</td> </tr> <tr> <td><input type="checkbox"/> Amikacin</td> <td><input type="checkbox"/> Linezolid</td> </tr> <tr> <td><input type="checkbox"/> Kanamycin</td> <td><input type="checkbox"/> Imipenem</td> </tr> <tr> <td><input type="checkbox"/> Capreomycin</td> <td><input type="checkbox"/> Bedaquiline</td> </tr> <tr> <td><input type="checkbox"/> Ofloxacin</td> <td><input type="checkbox"/> Other: _____</td> </tr> </table> | <input type="checkbox"/> RHZE | <input type="checkbox"/> Levofloxacin | <input type="checkbox"/> RH | <input type="checkbox"/> Moxifloxacin | <input type="checkbox"/> Rifampicin | <input type="checkbox"/> Terizidone | <input type="checkbox"/> Pyrazinamide | <input type="checkbox"/> Cycloserine | <input type="checkbox"/> Isoniazid | <input type="checkbox"/> Ethionamide | <input type="checkbox"/> Ethambutol | <input type="checkbox"/> Protionamide | <input type="checkbox"/> Streptomycin | <input type="checkbox"/> Para-aminosalicylic acid (PAS) | <input type="checkbox"/> Rifabutin | <input type="checkbox"/> Clofazimine | <input type="checkbox"/> Amikacin | <input type="checkbox"/> Linezolid | <input type="checkbox"/> Kanamycin | <input type="checkbox"/> Imipenem | <input type="checkbox"/> Capreomycin | <input type="checkbox"/> Bedaquiline | <input type="checkbox"/> Ofloxacin | <input type="checkbox"/> Other: _____ |
| <input type="checkbox"/> RHZE         | <input type="checkbox"/> Levofloxacin                    |                                                                                                                                                                                                                                                                                                                                                                                                                                                                                                                                                                                                                                                                                                                                                                                                                                                                                                                                                                                                                                                                                                                                                                                                                                                                                                       |                               |                                       |                             |                                       |                                     |                                     |                                       |                                      |                                    |                                      |                                     |                                       |                                       |                                                         |                                    |                                      |                                   |                                    |                                    |                                   |                                      |                                      |                                    |                                       |
| <input type="checkbox"/> RH           | <input type="checkbox"/> Moxifloxacin                    |                                                                                                                                                                                                                                                                                                                                                                                                                                                                                                                                                                                                                                                                                                                                                                                                                                                                                                                                                                                                                                                                                                                                                                                                                                                                                                       |                               |                                       |                             |                                       |                                     |                                     |                                       |                                      |                                    |                                      |                                     |                                       |                                       |                                                         |                                    |                                      |                                   |                                    |                                    |                                   |                                      |                                      |                                    |                                       |
| <input type="checkbox"/> Rifampicin   | <input type="checkbox"/> Terizidone                      |                                                                                                                                                                                                                                                                                                                                                                                                                                                                                                                                                                                                                                                                                                                                                                                                                                                                                                                                                                                                                                                                                                                                                                                                                                                                                                       |                               |                                       |                             |                                       |                                     |                                     |                                       |                                      |                                    |                                      |                                     |                                       |                                       |                                                         |                                    |                                      |                                   |                                    |                                    |                                   |                                      |                                      |                                    |                                       |
| <input type="checkbox"/> Pyrazinamide | <input type="checkbox"/> Cycloserine                     |                                                                                                                                                                                                                                                                                                                                                                                                                                                                                                                                                                                                                                                                                                                                                                                                                                                                                                                                                                                                                                                                                                                                                                                                                                                                                                       |                               |                                       |                             |                                       |                                     |                                     |                                       |                                      |                                    |                                      |                                     |                                       |                                       |                                                         |                                    |                                      |                                   |                                    |                                    |                                   |                                      |                                      |                                    |                                       |
| <input type="checkbox"/> Isoniazid    | <input type="checkbox"/> Ethionamide                     |                                                                                                                                                                                                                                                                                                                                                                                                                                                                                                                                                                                                                                                                                                                                                                                                                                                                                                                                                                                                                                                                                                                                                                                                                                                                                                       |                               |                                       |                             |                                       |                                     |                                     |                                       |                                      |                                    |                                      |                                     |                                       |                                       |                                                         |                                    |                                      |                                   |                                    |                                    |                                   |                                      |                                      |                                    |                                       |
| <input type="checkbox"/> Ethambutol   | <input type="checkbox"/> Protionamide                    |                                                                                                                                                                                                                                                                                                                                                                                                                                                                                                                                                                                                                                                                                                                                                                                                                                                                                                                                                                                                                                                                                                                                                                                                                                                                                                       |                               |                                       |                             |                                       |                                     |                                     |                                       |                                      |                                    |                                      |                                     |                                       |                                       |                                                         |                                    |                                      |                                   |                                    |                                    |                                   |                                      |                                      |                                    |                                       |
| <input type="checkbox"/> Streptomycin | <input type="checkbox"/> Para-aminosalicylic acid (PAS)  |                                                                                                                                                                                                                                                                                                                                                                                                                                                                                                                                                                                                                                                                                                                                                                                                                                                                                                                                                                                                                                                                                                                                                                                                                                                                                                       |                               |                                       |                             |                                       |                                     |                                     |                                       |                                      |                                    |                                      |                                     |                                       |                                       |                                                         |                                    |                                      |                                   |                                    |                                    |                                   |                                      |                                      |                                    |                                       |
| <input type="checkbox"/> Rifabutin    | <input type="checkbox"/> Clofazimine                     |                                                                                                                                                                                                                                                                                                                                                                                                                                                                                                                                                                                                                                                                                                                                                                                                                                                                                                                                                                                                                                                                                                                                                                                                                                                                                                       |                               |                                       |                             |                                       |                                     |                                     |                                       |                                      |                                    |                                      |                                     |                                       |                                       |                                                         |                                    |                                      |                                   |                                    |                                    |                                   |                                      |                                      |                                    |                                       |
| <input type="checkbox"/> Amikacin     | <input type="checkbox"/> Linezolid                       |                                                                                                                                                                                                                                                                                                                                                                                                                                                                                                                                                                                                                                                                                                                                                                                                                                                                                                                                                                                                                                                                                                                                                                                                                                                                                                       |                               |                                       |                             |                                       |                                     |                                     |                                       |                                      |                                    |                                      |                                     |                                       |                                       |                                                         |                                    |                                      |                                   |                                    |                                    |                                   |                                      |                                      |                                    |                                       |
| <input type="checkbox"/> Kanamycin    | <input type="checkbox"/> Imipenem                        |                                                                                                                                                                                                                                                                                                                                                                                                                                                                                                                                                                                                                                                                                                                                                                                                                                                                                                                                                                                                                                                                                                                                                                                                                                                                                                       |                               |                                       |                             |                                       |                                     |                                     |                                       |                                      |                                    |                                      |                                     |                                       |                                       |                                                         |                                    |                                      |                                   |                                    |                                    |                                   |                                      |                                      |                                    |                                       |
| <input type="checkbox"/> Capreomycin  | <input type="checkbox"/> Bedaquiline                     |                                                                                                                                                                                                                                                                                                                                                                                                                                                                                                                                                                                                                                                                                                                                                                                                                                                                                                                                                                                                                                                                                                                                                                                                                                                                                                       |                               |                                       |                             |                                       |                                     |                                     |                                       |                                      |                                    |                                      |                                     |                                       |                                       |                                                         |                                    |                                      |                                   |                                    |                                    |                                   |                                      |                                      |                                    |                                       |
| <input type="checkbox"/> Ofloxacin    | <input type="checkbox"/> Other: _____                    |                                                                                                                                                                                                                                                                                                                                                                                                                                                                                                                                                                                                                                                                                                                                                                                                                                                                                                                                                                                                                                                                                                                                                                                                                                                                                                       |                               |                                       |                             |                                       |                                     |                                     |                                       |                                      |                                    |                                      |                                     |                                       |                                       |                                                         |                                    |                                      |                                   |                                    |                                    |                                   |                                      |                                      |                                    |                                       |
| 41                                    |                                                          |                                                                                                                                                                                                                                                                                                                                                                                                                                                                                                                                                                                                                                                                                                                                                                                                                                                                                                                                                                                                                                                                                                                                                                                                                                                                                                       |                               |                                       |                             |                                       |                                     |                                     |                                       |                                      |                                    |                                      |                                     |                                       |                                       |                                                         |                                    |                                      |                                   |                                    |                                    |                                   |                                      |                                      |                                    |                                       |
| 42                                    |                                                          |                                                                                                                                                                                                                                                                                                                                                                                                                                                                                                                                                                                                                                                                                                                                                                                                                                                                                                                                                                                                                                                                                                                                                                                                                                                                                                       |                               |                                       |                             |                                       |                                     |                                     |                                       |                                      |                                    |                                      |                                     |                                       |                                       |                                                         |                                    |                                      |                                   |                                    |                                    |                                   |                                      |                                      |                                    |                                       |
| 43                                    |                                                          |                                                                                                                                                                                                                                                                                                                                                                                                                                                                                                                                                                                                                                                                                                                                                                                                                                                                                                                                                                                                                                                                                                                                                                                                                                                                                                       |                               |                                       |                             |                                       |                                     |                                     |                                       |                                      |                                    |                                      |                                     |                                       |                                       |                                                         |                                    |                                      |                                   |                                    |                                    |                                   |                                      |                                      |                                    |                                       |
| 44                                    |                                                          |                                                                                                                                                                                                                                                                                                                                                                                                                                                                                                                                                                                                                                                                                                                                                                                                                                                                                                                                                                                                                                                                                                                                                                                                                                                                                                       |                               |                                       |                             |                                       |                                     |                                     |                                       |                                      |                                    |                                      |                                     |                                       |                                       |                                                         |                                    |                                      |                                   |                                    |                                    |                                   |                                      |                                      |                                    |                                       |
| 45                                    |                                                          |                                                                                                                                                                                                                                                                                                                                                                                                                                                                                                                                                                                                                                                                                                                                                                                                                                                                                                                                                                                                                                                                                                                                                                                                                                                                                                       |                               |                                       |                             |                                       |                                     |                                     |                                       |                                      |                                    |                                      |                                     |                                       |                                       |                                                         |                                    |                                      |                                   |                                    |                                    |                                   |                                      |                                      |                                    |                                       |
| 46                                    |                                                          |                                                                                                                                                                                                                                                                                                                                                                                                                                                                                                                                                                                                                                                                                                                                                                                                                                                                                                                                                                                                                                                                                                                                                                                                                                                                                                       |                               |                                       |                             |                                       |                                     |                                     |                                       |                                      |                                    |                                      |                                     |                                       |                                       |                                                         |                                    |                                      |                                   |                                    |                                    |                                   |                                      |                                      |                                    |                                       |
| 47                                    |                                                          |                                                                                                                                                                                                                                                                                                                                                                                                                                                                                                                                                                                                                                                                                                                                                                                                                                                                                                                                                                                                                                                                                                                                                                                                                                                                                                       |                               |                                       |                             |                                       |                                     |                                     |                                       |                                      |                                    |                                      |                                     |                                       |                                       |                                                         |                                    |                                      |                                   |                                    |                                    |                                   |                                      |                                      |                                    |                                       |
| 48                                    |                                                          |                                                                                                                                                                                                                                                                                                                                                                                                                                                                                                                                                                                                                                                                                                                                                                                                                                                                                                                                                                                                                                                                                                                                                                                                                                                                                                       |                               |                                       |                             |                                       |                                     |                                     |                                       |                                      |                                    |                                      |                                     |                                       |                                       |                                                         |                                    |                                      |                                   |                                    |                                    |                                   |                                      |                                      |                                    |                                       |
| 49                                    |                                                          |                                                                                                                                                                                                                                                                                                                                                                                                                                                                                                                                                                                                                                                                                                                                                                                                                                                                                                                                                                                                                                                                                                                                                                                                                                                                                                       |                               |                                       |                             |                                       |                                     |                                     |                                       |                                      |                                    |                                      |                                     |                                       |                                       |                                                         |                                    |                                      |                                   |                                    |                                    |                                   |                                      |                                      |                                    |                                       |
| 50                                    |                                                          |                                                                                                                                                                                                                                                                                                                                                                                                                                                                                                                                                                                                                                                                                                                                                                                                                                                                                                                                                                                                                                                                                                                                                                                                                                                                                                       |                               |                                       |                             |                                       |                                     |                                     |                                       |                                      |                                    |                                      |                                     |                                       |                                       |                                                         |                                    |                                      |                                   |                                    |                                    |                                   |                                      |                                      |                                    |                                       |
| 51                                    |                                                          |                                                                                                                                                                                                                                                                                                                                                                                                                                                                                                                                                                                                                                                                                                                                                                                                                                                                                                                                                                                                                                                                                                                                                                                                                                                                                                       |                               |                                       |                             |                                       |                                     |                                     |                                       |                                      |                                    |                                      |                                     |                                       |                                       |                                                         |                                    |                                      |                                   |                                    |                                    |                                   |                                      |                                      |                                    |                                       |
| 52                                    |                                                          |                                                                                                                                                                                                                                                                                                                                                                                                                                                                                                                                                                                                                                                                                                                                                                                                                                                                                                                                                                                                                                                                                                                                                                                                                                                                                                       |                               |                                       |                             |                                       |                                     |                                     |                                       |                                      |                                    |                                      |                                     |                                       |                                       |                                                         |                                    |                                      |                                   |                                    |                                    |                                   |                                      |                                      |                                    |                                       |
| 53                                    |                                                          |                                                                                                                                                                                                                                                                                                                                                                                                                                                                                                                                                                                                                                                                                                                                                                                                                                                                                                                                                                                                                                                                                                                                                                                                                                                                                                       |                               |                                       |                             |                                       |                                     |                                     |                                       |                                      |                                    |                                      |                                     |                                       |                                       |                                                         |                                    |                                      |                                   |                                    |                                    |                                   |                                      |                                      |                                    |                                       |
| 54                                    |                                                          |                                                                                                                                                                                                                                                                                                                                                                                                                                                                                                                                                                                                                                                                                                                                                                                                                                                                                                                                                                                                                                                                                                                                                                                                                                                                                                       |                               |                                       |                             |                                       |                                     |                                     |                                       |                                      |                                    |                                      |                                     |                                       |                                       |                                                         |                                    |                                      |                                   |                                    |                                    |                                   |                                      |                                      |                                    |                                       |
| 55                                    |                                                          |                                                                                                                                                                                                                                                                                                                                                                                                                                                                                                                                                                                                                                                                                                                                                                                                                                                                                                                                                                                                                                                                                                                                                                                                                                                                                                       |                               |                                       |                             |                                       |                                     |                                     |                                       |                                      |                                    |                                      |                                     |                                       |                                       |                                                         |                                    |                                      |                                   |                                    |                                    |                                   |                                      |                                      |                                    |                                       |
| 56                                    |                                                          |                                                                                                                                                                                                                                                                                                                                                                                                                                                                                                                                                                                                                                                                                                                                                                                                                                                                                                                                                                                                                                                                                                                                                                                                                                                                                                       |                               |                                       |                             |                                       |                                     |                                     |                                       |                                      |                                    |                                      |                                     |                                       |                                       |                                                         |                                    |                                      |                                   |                                    |                                    |                                   |                                      |                                      |                                    |                                       |
| 57                                    |                                                          |                                                                                                                                                                                                                                                                                                                                                                                                                                                                                                                                                                                                                                                                                                                                                                                                                                                                                                                                                                                                                                                                                                                                                                                                                                                                                                       |                               |                                       |                             |                                       |                                     |                                     |                                       |                                      |                                    |                                      |                                     |                                       |                                       |                                                         |                                    |                                      |                                   |                                    |                                    |                                   |                                      |                                      |                                    |                                       |
| 58                                    |                                                          |                                                                                                                                                                                                                                                                                                                                                                                                                                                                                                                                                                                                                                                                                                                                                                                                                                                                                                                                                                                                                                                                                                                                                                                                                                                                                                       |                               |                                       |                             |                                       |                                     |                                     |                                       |                                      |                                    |                                      |                                     |                                       |                                       |                                                         |                                    |                                      |                                   |                                    |                                    |                                   |                                      |                                      |                                    |                                       |
| 59                                    |                                                          |                                                                                                                                                                                                                                                                                                                                                                                                                                                                                                                                                                                                                                                                                                                                                                                                                                                                                                                                                                                                                                                                                                                                                                                                                                                                                                       |                               |                                       |                             |                                       |                                     |                                     |                                       |                                      |                                    |                                      |                                     |                                       |                                       |                                                         |                                    |                                      |                                   |                                    |                                    |                                   |                                      |                                      |                                    |                                       |
| 60                                    | 18a. If RHZE, combination:                               | <input type="checkbox"/> RHZE 150/75/400/275 - 2 tablets<br><input type="checkbox"/> RHZE 150/75/400/275 - 3 tablets                                                                                                                                                                                                                                                                                                                                                                                                                                                                                                                                                                                                                                                                                                                                                                                                                                                                                                                                                                                                                                                                                                                                                                                  |                               |                                       |                             |                                       |                                     |                                     |                                       |                                      |                                    |                                      |                                     |                                       |                                       |                                                         |                                    |                                      |                                   |                                    |                                    |                                   |                                      |                                      |                                    |                                       |

**1eDEA TB SRN**

|                                                                                                                                                                                                                                                                                                          |                                                                                                                                                                                                                                                                                                                                                   |                                                                                                                                                                                                                                                                                                                                                                                                                                                                                                                                                                                                                                                                                                                                                                                                             |                                                                                                                                                                                                                                                                                                          |                                                                                                                                                                                                                                                                                                                                                   |
|----------------------------------------------------------------------------------------------------------------------------------------------------------------------------------------------------------------------------------------------------------------------------------------------------------|---------------------------------------------------------------------------------------------------------------------------------------------------------------------------------------------------------------------------------------------------------------------------------------------------------------------------------------------------|-------------------------------------------------------------------------------------------------------------------------------------------------------------------------------------------------------------------------------------------------------------------------------------------------------------------------------------------------------------------------------------------------------------------------------------------------------------------------------------------------------------------------------------------------------------------------------------------------------------------------------------------------------------------------------------------------------------------------------------------------------------------------------------------------------------|----------------------------------------------------------------------------------------------------------------------------------------------------------------------------------------------------------------------------------------------------------------------------------------------------------|---------------------------------------------------------------------------------------------------------------------------------------------------------------------------------------------------------------------------------------------------------------------------------------------------------------------------------------------------|
| 1<br>2<br>3<br>4                                                                                                                                                                                                                                                                                         |                                                                                                                                                                                                                                                                                                                                                   | <input type="checkbox"/> RHZE 150/75/400/275 - 4 tablets<br><input type="checkbox"/> RHZE 150/75/400/275 - 5 tablets                                                                                                                                                                                                                                                                                                                                                                                                                                                                                                                                                                                                                                                                                        |                                                                                                                                                                                                                                                                                                          |                                                                                                                                                                                                                                                                                                                                                   |
| 5<br>6<br>7<br>8<br>9<br>10<br>11<br>12<br>13                                                                                                                                                                                                                                                            | 18b. If RH, combination:                                                                                                                                                                                                                                                                                                                          | <input type="checkbox"/> RH 150/75 - 2 tablets<br><input type="checkbox"/> RH 150/75 - 3 tablets<br><input type="checkbox"/> RH 150/75 - 4 tablets<br><input type="checkbox"/> RH 150/75 - 5 tablets<br><input type="checkbox"/> RH 300/200 - 1 tablet or capsule<br><input type="checkbox"/> RH 300/200 - 2 tablets or capsules<br><input type="checkbox"/> RH 300/200 - 1 tablet or capsule + RH 150/100 - 1 tablet<br><input type="checkbox"/> RH 300/200 - 2 tablets or capsules + RH 150/100 - 1 tablet                                                                                                                                                                                                                                                                                                |                                                                                                                                                                                                                                                                                                          |                                                                                                                                                                                                                                                                                                                                                   |
| 14<br>15                                                                                                                                                                                                                                                                                                 | 18c. Other drugs - Dose (mg)                                                                                                                                                                                                                                                                                                                      | _ _ _ _                                                                                                                                                                                                                                                                                                                                                                                                                                                                                                                                                                                                                                                                                                                                                                                                     |                                                                                                                                                                                                                                                                                                          |                                                                                                                                                                                                                                                                                                                                                   |
| 16<br>17<br>18                                                                                                                                                                                                                                                                                           | 18d. How many times a day is this medication prescribed?                                                                                                                                                                                                                                                                                          | _ _ _                                                                                                                                                                                                                                                                                                                                                                                                                                                                                                                                                                                                                                                                                                                                                                                                       |                                                                                                                                                                                                                                                                                                          |                                                                                                                                                                                                                                                                                                                                                   |
| 19<br>20<br>21<br>22                                                                                                                                                                                                                                                                                     | 18e. How many days a week is this medication prescribed?                                                                                                                                                                                                                                                                                          | _ _ _                                                                                                                                                                                                                                                                                                                                                                                                                                                                                                                                                                                                                                                                                                                                                                                                       |                                                                                                                                                                                                                                                                                                          |                                                                                                                                                                                                                                                                                                                                                   |
| 23<br>24<br>25                                                                                                                                                                                                                                                                                           | 18f. Start Date                                                                                                                                                                                                                                                                                                                                   | _ _ _ / _ _ _ / _ _ _ _ _  (dd/mm/yyyy)                                                                                                                                                                                                                                                                                                                                                                                                                                                                                                                                                                                                                                                                                                                                                                     |                                                                                                                                                                                                                                                                                                          |                                                                                                                                                                                                                                                                                                                                                   |
| 26<br>27<br>28<br>29<br>30<br>31<br>32                                                                                                                                                                                                                                                                   | 18g. Stop Date                                                                                                                                                                                                                                                                                                                                    | _ _ _ _ / _ _ _ _ / _ _ _ _ _  (dd/mm/yyyy)<br><input type="checkbox"/> Treatment Ongoing ( <i>return to update the status at next visit. Update stop date and reason once medication is stopped.</i> )<br><input type="checkbox"/> Unknown                                                                                                                                                                                                                                                                                                                                                                                                                                                                                                                                                                 |                                                                                                                                                                                                                                                                                                          |                                                                                                                                                                                                                                                                                                                                                   |
| 33<br>34<br>35<br>36<br>37<br>38<br>39<br>40<br>41<br>42<br>43<br>44<br>45<br>46<br>47<br>48                                                                                                                                                                                                             | 18h. Reason for change, interruption or completion                                                                                                                                                                                                                                                                                                | <input type="checkbox"/> Completed intensive phase<br><input type="checkbox"/> Completed continuation phase<br><input type="checkbox"/> TB treatment failure<br><input type="checkbox"/> Drug resistance<br><input type="checkbox"/> Pregnancy<br><input type="checkbox"/> Side effects or toxicity<br><input type="checkbox"/> Incompatibility with ART (antiretroviral treatment)<br><input type="checkbox"/> Drug interaction<br><input type="checkbox"/> Participant stopped taking the meds<br><input type="checkbox"/> Lost to follow up<br><input type="checkbox"/> Dose adjustment (e.g. for weight change)<br><input type="checkbox"/> Death<br><input type="checkbox"/> Other _____<br><input type="checkbox"/> Unknown                                                                           |                                                                                                                                                                                                                                                                                                          |                                                                                                                                                                                                                                                                                                                                                   |
| 49<br>50                                                                                                                                                                                                                                                                                                 | <b>TB Drug 19</b>                                                                                                                                                                                                                                                                                                                                 |                                                                                                                                                                                                                                                                                                                                                                                                                                                                                                                                                                                                                                                                                                                                                                                                             |                                                                                                                                                                                                                                                                                                          |                                                                                                                                                                                                                                                                                                                                                   |
| 51<br>52<br>53<br>54<br>55<br>56<br>57<br>58<br>59<br>60                                                                                                                                                                                                                                                 | 19. TB Drug 19 (select one)                                                                                                                                                                                                                                                                                                                       | <table border="1"> <tr> <td> <input type="checkbox"/> RHZE<br/> <input type="checkbox"/> RH<br/> <input type="checkbox"/> Rifampicin<br/> <input type="checkbox"/> Pyrazinamide<br/> <input type="checkbox"/> Isoniazid<br/> <input type="checkbox"/> Ethambutol<br/> <input type="checkbox"/> Streptomycin<br/> <input type="checkbox"/> Rifabutin                             </td> <td> <input type="checkbox"/> Levofloxacin<br/> <input type="checkbox"/> Moxifloxacin<br/> <input type="checkbox"/> Terizidone<br/> <input type="checkbox"/> Cycloserine<br/> <input type="checkbox"/> Ethionamide<br/> <input type="checkbox"/> Protionamide<br/> <input type="checkbox"/> Para-aminosalicylic acid (PAS)<br/> <input type="checkbox"/> Clofazimine                             </td> </tr> </table> | <input type="checkbox"/> RHZE<br><input type="checkbox"/> RH<br><input type="checkbox"/> Rifampicin<br><input type="checkbox"/> Pyrazinamide<br><input type="checkbox"/> Isoniazid<br><input type="checkbox"/> Ethambutol<br><input type="checkbox"/> Streptomycin<br><input type="checkbox"/> Rifabutin | <input type="checkbox"/> Levofloxacin<br><input type="checkbox"/> Moxifloxacin<br><input type="checkbox"/> Terizidone<br><input type="checkbox"/> Cycloserine<br><input type="checkbox"/> Ethionamide<br><input type="checkbox"/> Protionamide<br><input type="checkbox"/> Para-aminosalicylic acid (PAS)<br><input type="checkbox"/> Clofazimine |
| <input type="checkbox"/> RHZE<br><input type="checkbox"/> RH<br><input type="checkbox"/> Rifampicin<br><input type="checkbox"/> Pyrazinamide<br><input type="checkbox"/> Isoniazid<br><input type="checkbox"/> Ethambutol<br><input type="checkbox"/> Streptomycin<br><input type="checkbox"/> Rifabutin | <input type="checkbox"/> Levofloxacin<br><input type="checkbox"/> Moxifloxacin<br><input type="checkbox"/> Terizidone<br><input type="checkbox"/> Cycloserine<br><input type="checkbox"/> Ethionamide<br><input type="checkbox"/> Protionamide<br><input type="checkbox"/> Para-aminosalicylic acid (PAS)<br><input type="checkbox"/> Clofazimine |                                                                                                                                                                                                                                                                                                                                                                                                                                                                                                                                                                                                                                                                                                                                                                                                             |                                                                                                                                                                                                                                                                                                          |                                                                                                                                                                                                                                                                                                                                                   |

## IeDEA TB SRN

|                                                                                                    |                                                          |                                                                                                                                                                                                                                                                                                                                                                                                                                                                                                                                                                                                                                                                                                                                   |
|----------------------------------------------------------------------------------------------------|----------------------------------------------------------|-----------------------------------------------------------------------------------------------------------------------------------------------------------------------------------------------------------------------------------------------------------------------------------------------------------------------------------------------------------------------------------------------------------------------------------------------------------------------------------------------------------------------------------------------------------------------------------------------------------------------------------------------------------------------------------------------------------------------------------|
| 1<br>2<br>3<br>4<br>5<br>6<br>7<br>8<br>9                                                          |                                                          | <input type="checkbox"/> Amikacin<br><input type="checkbox"/> Kanamycin<br><input type="checkbox"/> Capreomycin<br><input type="checkbox"/> Ofloxacin <input type="checkbox"/> Linezolid<br><input type="checkbox"/> Imipenem<br><input type="checkbox"/> Bedaquiline<br><input type="checkbox"/> Other: _____                                                                                                                                                                                                                                                                                                                                                                                                                    |
| 10<br>11<br>12<br>13<br>14                                                                         | 19a. If RHZE, combination:                               | <input type="checkbox"/> RHZE 150/75/400/275 - 2 tablets<br><input type="checkbox"/> RHZE 150/75/400/275 - 3 tablets<br><input type="checkbox"/> RHZE 150/75/400/275 - 4 tablets<br><input type="checkbox"/> RHZE 150/75/400/275 - 5 tablets                                                                                                                                                                                                                                                                                                                                                                                                                                                                                      |
| 15<br>16<br>17<br>18<br>19<br>20<br>21<br>22<br>23<br>24                                           | 19b. If RH, combination:                                 | <input type="checkbox"/> RH 150/75 - 2 tablets<br><input type="checkbox"/> RH 150/75 - 3 tablets<br><input type="checkbox"/> RH 150/75 - 4 tablets<br><input type="checkbox"/> RH 150/75 - 5 tablets<br><input type="checkbox"/> RH 300/200 - 1 tablet or capsule<br><input type="checkbox"/> RH 300/200 - 2 tablets or capsules<br><input type="checkbox"/> RH 300/200 - 1 tablet or capsule + RH 150/100 - 1 tablet<br><input type="checkbox"/> RH 300/200 - 2 tablets or capsules + RH 150/100 - 1 tablet                                                                                                                                                                                                                      |
| 25<br>26                                                                                           | 19c. Other drugs - Dose (mg)                             | _ _ _ _                                                                                                                                                                                                                                                                                                                                                                                                                                                                                                                                                                                                                                                                                                                           |
| 27<br>28<br>29                                                                                     | 19d. How many times a day is this medication prescribed? | _ _ _                                                                                                                                                                                                                                                                                                                                                                                                                                                                                                                                                                                                                                                                                                                             |
| 30<br>31<br>32                                                                                     | 19e. How many days a week is this medication prescribed? | _ _ _                                                                                                                                                                                                                                                                                                                                                                                                                                                                                                                                                                                                                                                                                                                             |
| 33<br>34                                                                                           | 19f. Start Date                                          | _ _ _ / _ _ _ / _ _ _ _ _  (dd/mm/yyyy)                                                                                                                                                                                                                                                                                                                                                                                                                                                                                                                                                                                                                                                                                           |
| 35<br>36<br>37<br>38<br>39<br>40<br>41<br>42                                                       | 19g. Stop Date                                           | _ _ _ / _ _ _ / _ _ _ _ _  (dd/mm/yyyy)<br><input type="checkbox"/> Treatment Ongoing ( <i>return to update the status at next visit. Update stop date and reason once medication is stopped.</i> )<br><input type="checkbox"/> Unknown                                                                                                                                                                                                                                                                                                                                                                                                                                                                                           |
| 43<br>44<br>45<br>46<br>47<br>48<br>49<br>50<br>51<br>52<br>53<br>54<br>55<br>56<br>57<br>58<br>59 | 19h. Reason for change, interruption or completion       | <input type="checkbox"/> Completed intensive phase<br><input type="checkbox"/> Completed continuation phase<br><input type="checkbox"/> TB treatment failure<br><input type="checkbox"/> Drug resistance<br><input type="checkbox"/> Pregnancy<br><input type="checkbox"/> Side effects or toxicity<br><input type="checkbox"/> Incompatibility with ART (antiretroviral treatment)<br><input type="checkbox"/> Drug interaction<br><input type="checkbox"/> Participant stopped taking the meds<br><input type="checkbox"/> Lost to follow up<br><input type="checkbox"/> Dose adjustment (e.g. for weight change)<br><input type="checkbox"/> Death<br><input type="checkbox"/> Other _____<br><input type="checkbox"/> Unknown |
| 60                                                                                                 | <b>TB Drug 20</b>                                        |                                                                                                                                                                                                                                                                                                                                                                                                                                                                                                                                                                                                                                                                                                                                   |

**leDEA TB SRN**

|                                                                 |                                                                                                                                                                                                                                                                                                                                                                                                                                                                                                                                                                                                                                                                                                                                                                                                                                                                                                                                                                                                                                                                                                                                                                                                                                                                                                       |                               |                                       |                             |                                       |                                     |                                     |                                       |                                      |                                    |                                      |                                     |                                       |                                       |                                                         |                                    |                                      |                                   |                                    |                                    |                                   |                                      |                                      |                                    |                                       |
|-----------------------------------------------------------------|-------------------------------------------------------------------------------------------------------------------------------------------------------------------------------------------------------------------------------------------------------------------------------------------------------------------------------------------------------------------------------------------------------------------------------------------------------------------------------------------------------------------------------------------------------------------------------------------------------------------------------------------------------------------------------------------------------------------------------------------------------------------------------------------------------------------------------------------------------------------------------------------------------------------------------------------------------------------------------------------------------------------------------------------------------------------------------------------------------------------------------------------------------------------------------------------------------------------------------------------------------------------------------------------------------|-------------------------------|---------------------------------------|-----------------------------|---------------------------------------|-------------------------------------|-------------------------------------|---------------------------------------|--------------------------------------|------------------------------------|--------------------------------------|-------------------------------------|---------------------------------------|---------------------------------------|---------------------------------------------------------|------------------------------------|--------------------------------------|-----------------------------------|------------------------------------|------------------------------------|-----------------------------------|--------------------------------------|--------------------------------------|------------------------------------|---------------------------------------|
| <p>20. TB Drug 20<br/>(Select one)</p>                          | <table border="1"> <tr> <td><input type="checkbox"/> RHZE</td> <td><input type="checkbox"/> Levofloxacin</td> </tr> <tr> <td><input type="checkbox"/> RH</td> <td><input type="checkbox"/> Moxifloxacin</td> </tr> <tr> <td><input type="checkbox"/> Rifampicin</td> <td><input type="checkbox"/> Terizidone</td> </tr> <tr> <td><input type="checkbox"/> Pyrazinamide</td> <td><input type="checkbox"/> Cycloserine</td> </tr> <tr> <td><input type="checkbox"/> Isoniazid</td> <td><input type="checkbox"/> Ethionamide</td> </tr> <tr> <td><input type="checkbox"/> Ethambutol</td> <td><input type="checkbox"/> Protionamide</td> </tr> <tr> <td><input type="checkbox"/> Streptomycin</td> <td><input type="checkbox"/> Para-aminosalicylic acid (PAS)</td> </tr> <tr> <td><input type="checkbox"/> Rifabutin</td> <td><input type="checkbox"/> Clofazimine</td> </tr> <tr> <td><input type="checkbox"/> Amikacin</td> <td><input type="checkbox"/> Linezolid</td> </tr> <tr> <td><input type="checkbox"/> Kanamycin</td> <td><input type="checkbox"/> Imipenem</td> </tr> <tr> <td><input type="checkbox"/> Capreomycin</td> <td><input type="checkbox"/> Bedaquiline</td> </tr> <tr> <td><input type="checkbox"/> Ofloxacin</td> <td><input type="checkbox"/> Other: _____</td> </tr> </table> | <input type="checkbox"/> RHZE | <input type="checkbox"/> Levofloxacin | <input type="checkbox"/> RH | <input type="checkbox"/> Moxifloxacin | <input type="checkbox"/> Rifampicin | <input type="checkbox"/> Terizidone | <input type="checkbox"/> Pyrazinamide | <input type="checkbox"/> Cycloserine | <input type="checkbox"/> Isoniazid | <input type="checkbox"/> Ethionamide | <input type="checkbox"/> Ethambutol | <input type="checkbox"/> Protionamide | <input type="checkbox"/> Streptomycin | <input type="checkbox"/> Para-aminosalicylic acid (PAS) | <input type="checkbox"/> Rifabutin | <input type="checkbox"/> Clofazimine | <input type="checkbox"/> Amikacin | <input type="checkbox"/> Linezolid | <input type="checkbox"/> Kanamycin | <input type="checkbox"/> Imipenem | <input type="checkbox"/> Capreomycin | <input type="checkbox"/> Bedaquiline | <input type="checkbox"/> Ofloxacin | <input type="checkbox"/> Other: _____ |
| <input type="checkbox"/> RHZE                                   | <input type="checkbox"/> Levofloxacin                                                                                                                                                                                                                                                                                                                                                                                                                                                                                                                                                                                                                                                                                                                                                                                                                                                                                                                                                                                                                                                                                                                                                                                                                                                                 |                               |                                       |                             |                                       |                                     |                                     |                                       |                                      |                                    |                                      |                                     |                                       |                                       |                                                         |                                    |                                      |                                   |                                    |                                    |                                   |                                      |                                      |                                    |                                       |
| <input type="checkbox"/> RH                                     | <input type="checkbox"/> Moxifloxacin                                                                                                                                                                                                                                                                                                                                                                                                                                                                                                                                                                                                                                                                                                                                                                                                                                                                                                                                                                                                                                                                                                                                                                                                                                                                 |                               |                                       |                             |                                       |                                     |                                     |                                       |                                      |                                    |                                      |                                     |                                       |                                       |                                                         |                                    |                                      |                                   |                                    |                                    |                                   |                                      |                                      |                                    |                                       |
| <input type="checkbox"/> Rifampicin                             | <input type="checkbox"/> Terizidone                                                                                                                                                                                                                                                                                                                                                                                                                                                                                                                                                                                                                                                                                                                                                                                                                                                                                                                                                                                                                                                                                                                                                                                                                                                                   |                               |                                       |                             |                                       |                                     |                                     |                                       |                                      |                                    |                                      |                                     |                                       |                                       |                                                         |                                    |                                      |                                   |                                    |                                    |                                   |                                      |                                      |                                    |                                       |
| <input type="checkbox"/> Pyrazinamide                           | <input type="checkbox"/> Cycloserine                                                                                                                                                                                                                                                                                                                                                                                                                                                                                                                                                                                                                                                                                                                                                                                                                                                                                                                                                                                                                                                                                                                                                                                                                                                                  |                               |                                       |                             |                                       |                                     |                                     |                                       |                                      |                                    |                                      |                                     |                                       |                                       |                                                         |                                    |                                      |                                   |                                    |                                    |                                   |                                      |                                      |                                    |                                       |
| <input type="checkbox"/> Isoniazid                              | <input type="checkbox"/> Ethionamide                                                                                                                                                                                                                                                                                                                                                                                                                                                                                                                                                                                                                                                                                                                                                                                                                                                                                                                                                                                                                                                                                                                                                                                                                                                                  |                               |                                       |                             |                                       |                                     |                                     |                                       |                                      |                                    |                                      |                                     |                                       |                                       |                                                         |                                    |                                      |                                   |                                    |                                    |                                   |                                      |                                      |                                    |                                       |
| <input type="checkbox"/> Ethambutol                             | <input type="checkbox"/> Protionamide                                                                                                                                                                                                                                                                                                                                                                                                                                                                                                                                                                                                                                                                                                                                                                                                                                                                                                                                                                                                                                                                                                                                                                                                                                                                 |                               |                                       |                             |                                       |                                     |                                     |                                       |                                      |                                    |                                      |                                     |                                       |                                       |                                                         |                                    |                                      |                                   |                                    |                                    |                                   |                                      |                                      |                                    |                                       |
| <input type="checkbox"/> Streptomycin                           | <input type="checkbox"/> Para-aminosalicylic acid (PAS)                                                                                                                                                                                                                                                                                                                                                                                                                                                                                                                                                                                                                                                                                                                                                                                                                                                                                                                                                                                                                                                                                                                                                                                                                                               |                               |                                       |                             |                                       |                                     |                                     |                                       |                                      |                                    |                                      |                                     |                                       |                                       |                                                         |                                    |                                      |                                   |                                    |                                    |                                   |                                      |                                      |                                    |                                       |
| <input type="checkbox"/> Rifabutin                              | <input type="checkbox"/> Clofazimine                                                                                                                                                                                                                                                                                                                                                                                                                                                                                                                                                                                                                                                                                                                                                                                                                                                                                                                                                                                                                                                                                                                                                                                                                                                                  |                               |                                       |                             |                                       |                                     |                                     |                                       |                                      |                                    |                                      |                                     |                                       |                                       |                                                         |                                    |                                      |                                   |                                    |                                    |                                   |                                      |                                      |                                    |                                       |
| <input type="checkbox"/> Amikacin                               | <input type="checkbox"/> Linezolid                                                                                                                                                                                                                                                                                                                                                                                                                                                                                                                                                                                                                                                                                                                                                                                                                                                                                                                                                                                                                                                                                                                                                                                                                                                                    |                               |                                       |                             |                                       |                                     |                                     |                                       |                                      |                                    |                                      |                                     |                                       |                                       |                                                         |                                    |                                      |                                   |                                    |                                    |                                   |                                      |                                      |                                    |                                       |
| <input type="checkbox"/> Kanamycin                              | <input type="checkbox"/> Imipenem                                                                                                                                                                                                                                                                                                                                                                                                                                                                                                                                                                                                                                                                                                                                                                                                                                                                                                                                                                                                                                                                                                                                                                                                                                                                     |                               |                                       |                             |                                       |                                     |                                     |                                       |                                      |                                    |                                      |                                     |                                       |                                       |                                                         |                                    |                                      |                                   |                                    |                                    |                                   |                                      |                                      |                                    |                                       |
| <input type="checkbox"/> Capreomycin                            | <input type="checkbox"/> Bedaquiline                                                                                                                                                                                                                                                                                                                                                                                                                                                                                                                                                                                                                                                                                                                                                                                                                                                                                                                                                                                                                                                                                                                                                                                                                                                                  |                               |                                       |                             |                                       |                                     |                                     |                                       |                                      |                                    |                                      |                                     |                                       |                                       |                                                         |                                    |                                      |                                   |                                    |                                    |                                   |                                      |                                      |                                    |                                       |
| <input type="checkbox"/> Ofloxacin                              | <input type="checkbox"/> Other: _____                                                                                                                                                                                                                                                                                                                                                                                                                                                                                                                                                                                                                                                                                                                                                                                                                                                                                                                                                                                                                                                                                                                                                                                                                                                                 |                               |                                       |                             |                                       |                                     |                                     |                                       |                                      |                                    |                                      |                                     |                                       |                                       |                                                         |                                    |                                      |                                   |                                    |                                    |                                   |                                      |                                      |                                    |                                       |
| <p>20a. If RHZE, combination:</p>                               | <p><input type="checkbox"/> RHZE 150/75/400/275 - 2 tablets<br/> <input type="checkbox"/> RHZE 150/75/400/275 - 3 tablets<br/> <input type="checkbox"/> RHZE 150/75/400/275 - 4 tablets<br/> <input type="checkbox"/> RHZE 150/75/400/275 - 5 tablets</p>                                                                                                                                                                                                                                                                                                                                                                                                                                                                                                                                                                                                                                                                                                                                                                                                                                                                                                                                                                                                                                             |                               |                                       |                             |                                       |                                     |                                     |                                       |                                      |                                    |                                      |                                     |                                       |                                       |                                                         |                                    |                                      |                                   |                                    |                                    |                                   |                                      |                                      |                                    |                                       |
| <p>20b. If RH, combination:</p>                                 | <p><input type="checkbox"/> RH 150/75 - 2 tablets<br/> <input type="checkbox"/> RH 150/75 - 3 tablets<br/> <input type="checkbox"/> RH 150/75 - 4 tablets<br/> <input type="checkbox"/> RH 150/75 - 5 tablets<br/> <input type="checkbox"/> RH 300/200 - 1 tablet or capsule<br/> <input type="checkbox"/> RH 300/200 - 2 tablets or capsules<br/> <input type="checkbox"/> RH 300/200 - 1 tablet or capsule + RH 150/100 - 1 tablet<br/> <input type="checkbox"/> RH 300/200 - 2 tablets or capsules + RH 150/100 - 1 tablet</p>                                                                                                                                                                                                                                                                                                                                                                                                                                                                                                                                                                                                                                                                                                                                                                     |                               |                                       |                             |                                       |                                     |                                     |                                       |                                      |                                    |                                      |                                     |                                       |                                       |                                                         |                                    |                                      |                                   |                                    |                                    |                                   |                                      |                                      |                                    |                                       |
| <p>20c. Other drugs - Dose (mg)</p>                             | <p>_ _ _ _ _ </p>                                                                                                                                                                                                                                                                                                                                                                                                                                                                                                                                                                                                                                                                                                                                                                                                                                                                                                                                                                                                                                                                                                                                                                                                                                                                                     |                               |                                       |                             |                                       |                                     |                                     |                                       |                                      |                                    |                                      |                                     |                                       |                                       |                                                         |                                    |                                      |                                   |                                    |                                    |                                   |                                      |                                      |                                    |                                       |
| <p>20d. How many times a day is this medication prescribed?</p> | <p>_ _ _ _ </p>                                                                                                                                                                                                                                                                                                                                                                                                                                                                                                                                                                                                                                                                                                                                                                                                                                                                                                                                                                                                                                                                                                                                                                                                                                                                                       |                               |                                       |                             |                                       |                                     |                                     |                                       |                                      |                                    |                                      |                                     |                                       |                                       |                                                         |                                    |                                      |                                   |                                    |                                    |                                   |                                      |                                      |                                    |                                       |
| <p>20e. How many days a week is this medication prescribed?</p> | <p>_ _ _ _ </p>                                                                                                                                                                                                                                                                                                                                                                                                                                                                                                                                                                                                                                                                                                                                                                                                                                                                                                                                                                                                                                                                                                                                                                                                                                                                                       |                               |                                       |                             |                                       |                                     |                                     |                                       |                                      |                                    |                                      |                                     |                                       |                                       |                                                         |                                    |                                      |                                   |                                    |                                    |                                   |                                      |                                      |                                    |                                       |
| <p>20f. Start Date</p>                                          | <p>_ _ _ / _ _ / _ _ _ _  (dd/mm/yyyy)</p>                                                                                                                                                                                                                                                                                                                                                                                                                                                                                                                                                                                                                                                                                                                                                                                                                                                                                                                                                                                                                                                                                                                                                                                                                                                            |                               |                                       |                             |                                       |                                     |                                     |                                       |                                      |                                    |                                      |                                     |                                       |                                       |                                                         |                                    |                                      |                                   |                                    |                                    |                                   |                                      |                                      |                                    |                                       |
| <p>20g. Stop Date</p>                                           | <p>_ _ _ / _ _ / _ _ _ _  (dd/mm/yyyy)</p> <p><input type="checkbox"/> Treatment Ongoing (Return to update the status at next visit. Update stop date and reason once medication is stopped.)<br/> <input type="checkbox"/> Unknown</p>                                                                                                                                                                                                                                                                                                                                                                                                                                                                                                                                                                                                                                                                                                                                                                                                                                                                                                                                                                                                                                                               |                               |                                       |                             |                                       |                                     |                                     |                                       |                                      |                                    |                                      |                                     |                                       |                                       |                                                         |                                    |                                      |                                   |                                    |                                    |                                   |                                      |                                      |                                    |                                       |
| <p>20h. Reason for change, interruption or completion</p>       | <p><input type="checkbox"/> Completed intensive phase<br/> <input type="checkbox"/> Completed continuation phase<br/> <input type="checkbox"/> TB treatment failure<br/> <input type="checkbox"/> Drug resistance<br/> <input type="checkbox"/> Pregnancy<br/> <input type="checkbox"/> Side effects or toxicity<br/> <input type="checkbox"/> Incompatibility with ART (antiretroviral treatment)<br/> <input type="checkbox"/> Drug interaction<br/> <input type="checkbox"/> Participant stopped taking the meds<br/> <input type="checkbox"/> Lost to follow up</p>                                                                                                                                                                                                                                                                                                                                                                                                                                                                                                                                                                                                                                                                                                                               |                               |                                       |                             |                                       |                                     |                                     |                                       |                                      |                                    |                                      |                                     |                                       |                                       |                                                         |                                    |                                      |                                   |                                    |                                    |                                   |                                      |                                      |                                    |                                       |



|                                                                |                                                                                                                                                                                                        |
|----------------------------------------------------------------|--------------------------------------------------------------------------------------------------------------------------------------------------------------------------------------------------------|
|                                                                | <input type="checkbox"/> Dose adjustment (e.g. for weight change)<br><input type="checkbox"/> Death<br><input type="checkbox"/> Other _____<br><input type="checkbox"/> Unknown                        |
| <b>Treatment End Summary</b>                                   |                                                                                                                                                                                                        |
| 21. Has this participant finished the prescribed TB treatment? | <input type="checkbox"/> Yes (complete the <b>TB Treatment Outcomes</b> form)<br><input type="checkbox"/> No<br><input type="checkbox"/> Not applicable<br><input type="checkbox"/> Still on treatment |
| 24. Notes (optional)                                           |                                                                                                                                                                                                        |

For peer review only

Investigator: \_\_\_\_\_ Signature: \_\_\_\_\_ Date |\_|\_| / |\_|\_| / |\_|\_|\_|\_|

**leDEA TB SRN**

| [20] TB TREATMENT ADHERENCE                                                             |                                                                                                                                                                                                                                                                                                                                                                                                                                                                                                                                                                                                                                                                                                                                                                                                                                                                           |
|-----------------------------------------------------------------------------------------|---------------------------------------------------------------------------------------------------------------------------------------------------------------------------------------------------------------------------------------------------------------------------------------------------------------------------------------------------------------------------------------------------------------------------------------------------------------------------------------------------------------------------------------------------------------------------------------------------------------------------------------------------------------------------------------------------------------------------------------------------------------------------------------------------------------------------------------------------------------------------|
| <b>leDEA/TB SRN ID</b>                                                                  |                                                                                                                                                                                                                                                                                                                                                                                                                                                                                                                                                                                                                                                                                                                                                                                                                                                                           |
| Visit                                                                                   | <input type="checkbox"/> Month 1<br><input type="checkbox"/> Month 2<br><input type="checkbox"/> End of Tx<br><input type="checkbox"/> Tx F/R/W                                                                                                                                                                                                                                                                                                                                                                                                                                                                                                                                                                                                                                                                                                                           |
| Visit date (dd/mm/yyyy)                                                                 | _ _ / _ _ / _ _ _ _                                                                                                                                                                                                                                                                                                                                                                                                                                                                                                                                                                                                                                                                                                                                                                                                                                                       |
| <b>Adherence questions</b>                                                              |                                                                                                                                                                                                                                                                                                                                                                                                                                                                                                                                                                                                                                                                                                                                                                                                                                                                           |
| 1. Any dose of TB drugs missed in the last 4 days                                       | <input type="checkbox"/> Yes<br><input type="checkbox"/> No<br><input type="checkbox"/> Unknown                                                                                                                                                                                                                                                                                                                                                                                                                                                                                                                                                                                                                                                                                                                                                                           |
| 1a. If yes, number of TB drugs doses missed in the last 4 days                          | _ _  doses                                                                                                                                                                                                                                                                                                                                                                                                                                                                                                                                                                                                                                                                                                                                                                                                                                                                |
| 2. Any dose of TB drugs missed in the last 30 days?                                     | <input type="checkbox"/> Yes<br><input type="checkbox"/> No<br><input type="checkbox"/> Unknown                                                                                                                                                                                                                                                                                                                                                                                                                                                                                                                                                                                                                                                                                                                                                                           |
| <b>Pill count for TB drugs</b>                                                          |                                                                                                                                                                                                                                                                                                                                                                                                                                                                                                                                                                                                                                                                                                                                                                                                                                                                           |
| 3. Date of last TB treatment refill (dd/mm/yyyy)                                        | _ _ / _ _ / _ _ _ _  <input type="checkbox"/> Unknown                                                                                                                                                                                                                                                                                                                                                                                                                                                                                                                                                                                                                                                                                                                                                                                                                     |
| 4. Expected number of tablets for TB treatment taken daily (since last refill)          | _ _  <input type="checkbox"/> Unknown                                                                                                                                                                                                                                                                                                                                                                                                                                                                                                                                                                                                                                                                                                                                                                                                                                     |
| 5. Number of tablets at last refill (tablets given + tablets patient already had)       | _ _ _  <input type="checkbox"/> Unknown                                                                                                                                                                                                                                                                                                                                                                                                                                                                                                                                                                                                                                                                                                                                                                                                                                   |
| 6. Number of tablets brought back                                                       | _ _ _  <input type="checkbox"/> Unknown                                                                                                                                                                                                                                                                                                                                                                                                                                                                                                                                                                                                                                                                                                                                                                                                                                   |
| 7. Description of any adherence challenges for TB drugs ( <i>Check all that apply</i> ) | <input type="checkbox"/> Forgetting dose(s)<br><input type="checkbox"/> Difficulty tolerating medication(s) / side effects<br><input type="checkbox"/> Unable to take medication(s) while feeling ill or unwell<br><input type="checkbox"/> Unable to take medication(s) due to not having food<br><input type="checkbox"/> Did not have privacy / unable to take medication(s) while around others<br><input type="checkbox"/> Not willing to take medication(s)<br><input type="checkbox"/> Did not have medication(s) with me at the time for dose<br><input type="checkbox"/> Did not have a sufficient supply of medication(s)<br><input type="checkbox"/> Medication(s) have not been available from pharmacy (e.g., stock-out)<br><input type="checkbox"/> Other (specify) _____<br><input type="checkbox"/> Unknown<br><input type="checkbox"/> Decline to answer |

Investigator: \_\_\_\_\_ Signature: \_\_\_\_\_ Date |\_|\_|/|\_|\_|/|\_|\_|\_|\_|  
 ID Number \_\_\_\_\_ TB Treatment Adherence Page 1 of 1  
 v1.0 26Jul2022

## leDEA TB-SRN

| [21] Directly Observed Therapy (DOT) for TB                                                                                                                                         |                                                                                                                                                                                                                                                                                                                                                                            |
|-------------------------------------------------------------------------------------------------------------------------------------------------------------------------------------|----------------------------------------------------------------------------------------------------------------------------------------------------------------------------------------------------------------------------------------------------------------------------------------------------------------------------------------------------------------------------|
| <b>leDEA/TB SRN ID</b>                                                                                                                                                              |                                                                                                                                                                                                                                                                                                                                                                            |
| Visit                                                                                                                                                                               | <input type="checkbox"/> Month 1<br><input type="checkbox"/> Month 2<br><input type="checkbox"/> End of Tx<br><input type="checkbox"/> Tx F/R/W                                                                                                                                                                                                                            |
| Visit date                                                                                                                                                                          | _ _ / _ _ / _ _ _ _  (dd/mm/yyyy)                                                                                                                                                                                                                                                                                                                                          |
| 1. Is this participant under <u>any form</u> of Directly Observed Therapy (DOT)?                                                                                                    | <input type="checkbox"/> Yes (complete form below)<br><input type="checkbox"/> No<br><input type="checkbox"/> Unknown                                                                                                                                                                                                                                                      |
| <b>Intensive Phase</b>                                                                                                                                                              |                                                                                                                                                                                                                                                                                                                                                                            |
| 2. Which types of DOTs, according to the study protocol definitions, are currently being or will be done for this participant during the intensive phase?<br>(Check all that apply) | <input type="checkbox"/> In person - with healthcare worker<br><input type="checkbox"/> In person - with community health worker<br><input type="checkbox"/> In person - with family member or another trusted person<br><input type="checkbox"/> Virtual - through smartphone via text message, photo or video<br><input type="checkbox"/> Telephone - by telephone calls |
| 3. Start Date of DOT                                                                                                                                                                | _ _ / _ _ / _ _ _ _  (dd/mm/yyyy)                                                                                                                                                                                                                                                                                                                                          |
| 4. Intensive phase ongoing or completed?                                                                                                                                            | <input type="checkbox"/> Ongoing → SKIP to #8<br><input type="checkbox"/> Completed (fill below)                                                                                                                                                                                                                                                                           |
| 5. End Date of DOT (if applicable)                                                                                                                                                  | _ _ / _ _ / _ _ _ _  (dd/mm/yyyy)                                                                                                                                                                                                                                                                                                                                          |
| <b>6. Intensive phase: how many doses did the patient take by...</b>                                                                                                                |                                                                                                                                                                                                                                                                                                                                                                            |
| a. In-Person DOT with a healthcare worker?                                                                                                                                          | _ _ _  doses                                                                                                                                                                                                                                                                                                                                                               |
| b. In-Person DOT with a community health worker?                                                                                                                                    | _ _ _  doses                                                                                                                                                                                                                                                                                                                                                               |
| c. In-Person DOT with a family member or other trusted person?                                                                                                                      | _ _ _  doses                                                                                                                                                                                                                                                                                                                                                               |
| d. Virtual DOT?                                                                                                                                                                     | _ _ _  doses                                                                                                                                                                                                                                                                                                                                                               |
| e. Telephone DOT?                                                                                                                                                                   | _ _ _  doses                                                                                                                                                                                                                                                                                                                                                               |
| f. without being observed? (e.g., doses administered without DOT, for example weekends, holidays and or treatment days before recruitment in the study)                             | _ _ _  doses                                                                                                                                                                                                                                                                                                                                                               |

|                                                    |                                                                                                                                                                                         |                                                                                                                                                                                                                                                                                                                                                                                  |
|----------------------------------------------------|-----------------------------------------------------------------------------------------------------------------------------------------------------------------------------------------|----------------------------------------------------------------------------------------------------------------------------------------------------------------------------------------------------------------------------------------------------------------------------------------------------------------------------------------------------------------------------------|
| 1<br>2<br>3                                        | 7. How many doses has the participant missed in the intensive phase?                                                                                                                    | _ _ _  doses                                                                                                                                                                                                                                                                                                                                                                     |
| 4<br>5<br>6                                        | 8. Has the participant interrupted the intensive phase of TB treatment for any reason, and for any duration?                                                                            | <input type="checkbox"/> Yes (report on <b>TB Treatment</b> form)<br><input type="checkbox"/> No                                                                                                                                                                                                                                                                                 |
| 7                                                  | <b>Continuation Phase</b>                                                                                                                                                               |                                                                                                                                                                                                                                                                                                                                                                                  |
| 8<br>9<br>10<br>11<br>12                           | 9. Continuation phase ongoing or completed?                                                                                                                                             | <input type="checkbox"/> Not yet started → END form<br><input type="checkbox"/> Ongoing (fill below)<br><input type="checkbox"/> Completed (fill below)                                                                                                                                                                                                                          |
| 13<br>14<br>15<br>16<br>17<br>18<br>19<br>20<br>21 | 10. Which types of DOTs, according to the study protocol definitions, are currently being or will be done for this participant during the continuation phase?<br>(Check all that apply) | <input type="checkbox"/> In person - with healthcare worker<br><input type="checkbox"/> In person - with community health worker<br><input type="checkbox"/> In person - with family member or another trusted person<br><input type="checkbox"/> Virtual - through smartphone via text message, photo or video<br><input type="checkbox"/> Telephone - by daily telephone calls |
| 22<br>23                                           | 11. Start Date                                                                                                                                                                          | _ _ / _ _ / _ _ _ _  (dd/mm/yyyy)                                                                                                                                                                                                                                                                                                                                                |
| 24<br>25<br>26<br>27                               | 12. Continuation phase                                                                                                                                                                  | <input type="checkbox"/> Ongoing → SKIP to #16<br><input type="checkbox"/> Completed (fill below)                                                                                                                                                                                                                                                                                |
| 28<br>29                                           | 13. End Date                                                                                                                                                                            | _ _ / _ _ / _ _ _ _  (dd/mm/yyyy)                                                                                                                                                                                                                                                                                                                                                |
| 30                                                 | <b>14. Continuation phase: how many doses did the patient take by...</b>                                                                                                                |                                                                                                                                                                                                                                                                                                                                                                                  |
| 31<br>32<br>33                                     | a. In-Person DOT with a healthcare worker?                                                                                                                                              | _ _ _  doses                                                                                                                                                                                                                                                                                                                                                                     |
| 34<br>35<br>36                                     | b. In-Person DOT with a community health worker?                                                                                                                                        | _ _ _  doses                                                                                                                                                                                                                                                                                                                                                                     |
| 37<br>38<br>39                                     | c. In-Person DOT with a family member or other trusted person?                                                                                                                          | _ _ _  doses                                                                                                                                                                                                                                                                                                                                                                     |
| 40<br>41<br>42                                     | d. Virtual DOT?                                                                                                                                                                         | _ _ _  doses                                                                                                                                                                                                                                                                                                                                                                     |
| 43<br>44                                           | e. Telephone DOT?                                                                                                                                                                       | _ _ _  doses                                                                                                                                                                                                                                                                                                                                                                     |
| 45<br>46<br>47<br>48                               | f. without being observed? (e.g., doses administered without DOT, for example weekends, holidays and or treatment days before recruitment in the study)                                 | _ _ _  doses                                                                                                                                                                                                                                                                                                                                                                     |
| 49<br>50<br>51<br>52                               | 15. How many doses has the participant missed in the continuation phase?                                                                                                                | _ _ _  doses                                                                                                                                                                                                                                                                                                                                                                     |
| 53<br>54<br>55                                     | 16. Has the participant interrupted the continuation phase of TB treatment by any reason?                                                                                               | <input type="checkbox"/> Yes (report on <b>TB Treatment</b> form)<br><input type="checkbox"/> No                                                                                                                                                                                                                                                                                 |

Investigator: \_\_\_\_\_ Signature: \_\_\_\_\_ Date |\_|\_|/|\_|\_|/|\_|\_|\_|\_|  
 ID Number \_\_\_\_\_ For peer review only - <http://bmjopen.bmj.com/site/about/guidelines.xhtml> DOT Page 2 of 2

**[22] Antiretroviral Therapy (ART) for HIV**  
**(REDCap Flowchart Form)**

IeDEA/TB SRN ID

| Visit                              | Date (dd/mm/yyyy)   | Visit                                 | Date (dd/mm/yyyy)   |
|------------------------------------|---------------------|---------------------------------------|---------------------|
| <input type="checkbox"/> Baseline  | _ _ / _ _ / _ _ _ _ | <input type="checkbox"/> 6-M Post-Tx  | _ _ / _ _ / _ _ _ _ |
| <input type="checkbox"/> Month 1   | _ _ / _ _ / _ _ _ _ | <input type="checkbox"/> 12-M Post-Tx | _ _ / _ _ / _ _ _ _ |
| <input type="checkbox"/> Month 2   | _ _ / _ _ / _ _ _ _ | <input type="checkbox"/> Tx F/R/W     | _ _ / _ _ / _ _ _ _ |
| <input type="checkbox"/> End of Tx | _ _ / _ _ / _ _ _ _ |                                       |                     |

HIV Drug 1

1. Antiretroviral (ARV) 1

(Select one)

- |                                                      |                                                              |
|------------------------------------------------------|--------------------------------------------------------------|
| <input type="checkbox"/> abacavir (ABC)              | <input type="checkbox"/> maraviroc (MVC)                     |
| <input type="checkbox"/> atazanavir (ATV)            | <input type="checkbox"/> nevirapine (NVP)                    |
| <input type="checkbox"/> darunavir (DRV)             | <input type="checkbox"/> raltegravir (RAL)                   |
| <input type="checkbox"/> didanosine (ddI)            | <input type="checkbox"/> ritonavir (RTV)                     |
| <input type="checkbox"/> dolutegravir (DTG)          | <input type="checkbox"/> stavudine (d4T)                     |
| <input type="checkbox"/> efavirenz (EFV)             | <input type="checkbox"/> tenofovir alafenamide (TAF)         |
| <input type="checkbox"/> enfuvirtide (ENF)           | <input type="checkbox"/> tenofovir disoproxil fumarate (TDF) |
| <input type="checkbox"/> emtricitabine (FTC)         | <input type="checkbox"/> tipranavir (TPV)                    |
| <input type="checkbox"/> etravirine (ETR)            | <input type="checkbox"/> zidovudine (AZT/ZDV)                |
| <input type="checkbox"/> lamivudine (3TC)            |                                                              |
| <input type="checkbox"/> lopinavir/ritonavir (LPV/r) | <input type="checkbox"/> Other: _____                        |

1a. Drug is part of a fixed-dose combination

 Yes  No

1b. How many times a day is this medication prescribed?

|\_|\_|\_|

1c. How many days a week is this medication prescribed?

|\_|\_|\_|

1d. Start Date

|\_|\_|/|\_|\_|/|\_|\_|\_|\_| (dd/mm/yyyy)

 Unknown

1e. Stop Date

|\_|\_|/|\_|\_|/|\_|\_|\_|\_| (dd/mm/yyyy)

 Ongoing (Return to update stop date if changed) Unknown

1f. Reason for change or interruption

 Drug resistance

**leDEA TB SRN**

|                                                                                                                                                                                                                                                                                                                                                                                                                                                                                                                          |                                                                                                                                                                                                                                                                                                                                                                                                                                                                                                                                                                                                                                                                                                                                                                                                                                                                                                                                                                                                                                                                                                                                                                                                                                                        |                                                                                                                                                                                                                                                                                                                                                                                                                                                                                                                          |                                                                                                                                                                                                                                                                                                                                                                                                                                                                                                |
|--------------------------------------------------------------------------------------------------------------------------------------------------------------------------------------------------------------------------------------------------------------------------------------------------------------------------------------------------------------------------------------------------------------------------------------------------------------------------------------------------------------------------|--------------------------------------------------------------------------------------------------------------------------------------------------------------------------------------------------------------------------------------------------------------------------------------------------------------------------------------------------------------------------------------------------------------------------------------------------------------------------------------------------------------------------------------------------------------------------------------------------------------------------------------------------------------------------------------------------------------------------------------------------------------------------------------------------------------------------------------------------------------------------------------------------------------------------------------------------------------------------------------------------------------------------------------------------------------------------------------------------------------------------------------------------------------------------------------------------------------------------------------------------------|--------------------------------------------------------------------------------------------------------------------------------------------------------------------------------------------------------------------------------------------------------------------------------------------------------------------------------------------------------------------------------------------------------------------------------------------------------------------------------------------------------------------------|------------------------------------------------------------------------------------------------------------------------------------------------------------------------------------------------------------------------------------------------------------------------------------------------------------------------------------------------------------------------------------------------------------------------------------------------------------------------------------------------|
|                                                                                                                                                                                                                                                                                                                                                                                                                                                                                                                          | <input type="checkbox"/> Drug interaction<br><input type="checkbox"/> Pregnancy<br><input type="checkbox"/> Side effects or toxicity<br><input type="checkbox"/> Compatibility with TB drugs<br><input type="checkbox"/> Participant stopped taking meds<br><input type="checkbox"/> Lost to follow up<br><input type="checkbox"/> Death<br><input type="checkbox"/> Other _____<br><input type="checkbox"/> Unknown                                                                                                                                                                                                                                                                                                                                                                                                                                                                                                                                                                                                                                                                                                                                                                                                                                   |                                                                                                                                                                                                                                                                                                                                                                                                                                                                                                                          |                                                                                                                                                                                                                                                                                                                                                                                                                                                                                                |
| <b>HIV Drug 2</b>                                                                                                                                                                                                                                                                                                                                                                                                                                                                                                        |                                                                                                                                                                                                                                                                                                                                                                                                                                                                                                                                                                                                                                                                                                                                                                                                                                                                                                                                                                                                                                                                                                                                                                                                                                                        |                                                                                                                                                                                                                                                                                                                                                                                                                                                                                                                          |                                                                                                                                                                                                                                                                                                                                                                                                                                                                                                |
| <b>2. ARV 2</b><br><i>(Select one)</i>                                                                                                                                                                                                                                                                                                                                                                                                                                                                                   | <table border="1" style="width: 100%;"> <tr> <td style="width: 50%; vertical-align: top;"> <input type="checkbox"/> abacavir (ABC)<br/> <input type="checkbox"/> atazanavir (ATV)<br/> <input type="checkbox"/> darunavir (DRV)<br/> <input type="checkbox"/> didanosine (ddI)<br/> <input type="checkbox"/> dolutegravir (DTG)<br/> <input type="checkbox"/> efavirenz (EFV)<br/> <input type="checkbox"/> enfuvirtide (ENF)<br/> <input type="checkbox"/> emtricitabine (FTC)<br/> <input type="checkbox"/> etravirine (ETR)<br/> <input type="checkbox"/> lamivudine (3TC)<br/> <input type="checkbox"/> lopinavir/ritonavir (LPV/r)           </td> <td style="width: 50%; vertical-align: top;"> <input type="checkbox"/> maraviroc (MVC)<br/> <input type="checkbox"/> nevirapine (NVP)<br/> <input type="checkbox"/> raltegravir (RAL)<br/> <input type="checkbox"/> ritonavir (RTV)<br/> <input type="checkbox"/> stavudine (d4T)<br/> <input type="checkbox"/> tenofovir alafenamide (TAF)<br/> <input type="checkbox"/> tenofovir disoproxil fumarate (TDF)<br/> <input type="checkbox"/> tipranavir (TPV)<br/> <input type="checkbox"/> zidovudine (AZT/ZDV)<br/><br/> <input type="checkbox"/> Other: _____           </td> </tr> </table> | <input type="checkbox"/> abacavir (ABC)<br><input type="checkbox"/> atazanavir (ATV)<br><input type="checkbox"/> darunavir (DRV)<br><input type="checkbox"/> didanosine (ddI)<br><input type="checkbox"/> dolutegravir (DTG)<br><input type="checkbox"/> efavirenz (EFV)<br><input type="checkbox"/> enfuvirtide (ENF)<br><input type="checkbox"/> emtricitabine (FTC)<br><input type="checkbox"/> etravirine (ETR)<br><input type="checkbox"/> lamivudine (3TC)<br><input type="checkbox"/> lopinavir/ritonavir (LPV/r) | <input type="checkbox"/> maraviroc (MVC)<br><input type="checkbox"/> nevirapine (NVP)<br><input type="checkbox"/> raltegravir (RAL)<br><input type="checkbox"/> ritonavir (RTV)<br><input type="checkbox"/> stavudine (d4T)<br><input type="checkbox"/> tenofovir alafenamide (TAF)<br><input type="checkbox"/> tenofovir disoproxil fumarate (TDF)<br><input type="checkbox"/> tipranavir (TPV)<br><input type="checkbox"/> zidovudine (AZT/ZDV)<br><br><input type="checkbox"/> Other: _____ |
| <input type="checkbox"/> abacavir (ABC)<br><input type="checkbox"/> atazanavir (ATV)<br><input type="checkbox"/> darunavir (DRV)<br><input type="checkbox"/> didanosine (ddI)<br><input type="checkbox"/> dolutegravir (DTG)<br><input type="checkbox"/> efavirenz (EFV)<br><input type="checkbox"/> enfuvirtide (ENF)<br><input type="checkbox"/> emtricitabine (FTC)<br><input type="checkbox"/> etravirine (ETR)<br><input type="checkbox"/> lamivudine (3TC)<br><input type="checkbox"/> lopinavir/ritonavir (LPV/r) | <input type="checkbox"/> maraviroc (MVC)<br><input type="checkbox"/> nevirapine (NVP)<br><input type="checkbox"/> raltegravir (RAL)<br><input type="checkbox"/> ritonavir (RTV)<br><input type="checkbox"/> stavudine (d4T)<br><input type="checkbox"/> tenofovir alafenamide (TAF)<br><input type="checkbox"/> tenofovir disoproxil fumarate (TDF)<br><input type="checkbox"/> tipranavir (TPV)<br><input type="checkbox"/> zidovudine (AZT/ZDV)<br><br><input type="checkbox"/> Other: _____                                                                                                                                                                                                                                                                                                                                                                                                                                                                                                                                                                                                                                                                                                                                                         |                                                                                                                                                                                                                                                                                                                                                                                                                                                                                                                          |                                                                                                                                                                                                                                                                                                                                                                                                                                                                                                |
| <b>2a. Drug is part of a fixed-dose combination</b>                                                                                                                                                                                                                                                                                                                                                                                                                                                                      | <input type="checkbox"/> Yes <input type="checkbox"/> No                                                                                                                                                                                                                                                                                                                                                                                                                                                                                                                                                                                                                                                                                                                                                                                                                                                                                                                                                                                                                                                                                                                                                                                               |                                                                                                                                                                                                                                                                                                                                                                                                                                                                                                                          |                                                                                                                                                                                                                                                                                                                                                                                                                                                                                                |
| <b>2b. How many times a day is this medication prescribed?</b>                                                                                                                                                                                                                                                                                                                                                                                                                                                           | _ _ _ _                                                                                                                                                                                                                                                                                                                                                                                                                                                                                                                                                                                                                                                                                                                                                                                                                                                                                                                                                                                                                                                                                                                                                                                                                                                |                                                                                                                                                                                                                                                                                                                                                                                                                                                                                                                          |                                                                                                                                                                                                                                                                                                                                                                                                                                                                                                |
| <b>2c. How many days a week is this medication prescribed?</b>                                                                                                                                                                                                                                                                                                                                                                                                                                                           | _ _ _ _                                                                                                                                                                                                                                                                                                                                                                                                                                                                                                                                                                                                                                                                                                                                                                                                                                                                                                                                                                                                                                                                                                                                                                                                                                                |                                                                                                                                                                                                                                                                                                                                                                                                                                                                                                                          |                                                                                                                                                                                                                                                                                                                                                                                                                                                                                                |
| <b>2d. Start Date</b>                                                                                                                                                                                                                                                                                                                                                                                                                                                                                                    | _ _ _ / _ _ _ / _ _ _ _ _  (dd/mm/yyyy)<br><br><input type="checkbox"/> Unknown                                                                                                                                                                                                                                                                                                                                                                                                                                                                                                                                                                                                                                                                                                                                                                                                                                                                                                                                                                                                                                                                                                                                                                        |                                                                                                                                                                                                                                                                                                                                                                                                                                                                                                                          |                                                                                                                                                                                                                                                                                                                                                                                                                                                                                                |
| <b>2e. Stop Date</b>                                                                                                                                                                                                                                                                                                                                                                                                                                                                                                     | _ _ _ / _ _ _ / _ _ _ _ _  (dd/mm/yyyy)<br><br><input type="checkbox"/> Ongoing <i>(Return to update stop date if changed)</i><br><input type="checkbox"/> Unknown                                                                                                                                                                                                                                                                                                                                                                                                                                                                                                                                                                                                                                                                                                                                                                                                                                                                                                                                                                                                                                                                                     |                                                                                                                                                                                                                                                                                                                                                                                                                                                                                                                          |                                                                                                                                                                                                                                                                                                                                                                                                                                                                                                |
| <b>2f. Reason for change or interruption</b>                                                                                                                                                                                                                                                                                                                                                                                                                                                                             | <input type="checkbox"/> Drug resistance<br><input type="checkbox"/> Drug interaction<br><input type="checkbox"/> Pregnancy<br><input type="checkbox"/> Side effects or toxicity<br><input type="checkbox"/> Compatibility with TB drugs<br><input type="checkbox"/> Participant stopped taking meds<br><input type="checkbox"/> Lost to follow up<br><input type="checkbox"/> Death                                                                                                                                                                                                                                                                                                                                                                                                                                                                                                                                                                                                                                                                                                                                                                                                                                                                   |                                                                                                                                                                                                                                                                                                                                                                                                                                                                                                                          |                                                                                                                                                                                                                                                                                                                                                                                                                                                                                                |

|                                                                                                                                                                                                                                                                                                                                                                                                                                                                                                                          |                                                                                                                                                                                                                                                                                                                                                                                                                                                                                            |                                                                                                                                                                                                                                                                                                                                                                                                                                                                                                                                                                                                                                                                                                                                                                                                                                                                                                                                                                                                                                                                                                                        |                                                                                                                                                                                                                                                                                                                                                                                                                                                                                                                          |                                                                                                                                                                                                                                                                                                                                                                                                                                                                                            |
|--------------------------------------------------------------------------------------------------------------------------------------------------------------------------------------------------------------------------------------------------------------------------------------------------------------------------------------------------------------------------------------------------------------------------------------------------------------------------------------------------------------------------|--------------------------------------------------------------------------------------------------------------------------------------------------------------------------------------------------------------------------------------------------------------------------------------------------------------------------------------------------------------------------------------------------------------------------------------------------------------------------------------------|------------------------------------------------------------------------------------------------------------------------------------------------------------------------------------------------------------------------------------------------------------------------------------------------------------------------------------------------------------------------------------------------------------------------------------------------------------------------------------------------------------------------------------------------------------------------------------------------------------------------------------------------------------------------------------------------------------------------------------------------------------------------------------------------------------------------------------------------------------------------------------------------------------------------------------------------------------------------------------------------------------------------------------------------------------------------------------------------------------------------|--------------------------------------------------------------------------------------------------------------------------------------------------------------------------------------------------------------------------------------------------------------------------------------------------------------------------------------------------------------------------------------------------------------------------------------------------------------------------------------------------------------------------|--------------------------------------------------------------------------------------------------------------------------------------------------------------------------------------------------------------------------------------------------------------------------------------------------------------------------------------------------------------------------------------------------------------------------------------------------------------------------------------------|
| 1<br>2<br>3<br>4<br>5                                                                                                                                                                                                                                                                                                                                                                                                                                                                                                    |                                                                                                                                                                                                                                                                                                                                                                                                                                                                                            | <input type="checkbox"/> Participant removed from study<br><input type="checkbox"/> Other _____<br><input type="checkbox"/> Unknown                                                                                                                                                                                                                                                                                                                                                                                                                                                                                                                                                                                                                                                                                                                                                                                                                                                                                                                                                                                    |                                                                                                                                                                                                                                                                                                                                                                                                                                                                                                                          |                                                                                                                                                                                                                                                                                                                                                                                                                                                                                            |
| 6<br>7                                                                                                                                                                                                                                                                                                                                                                                                                                                                                                                   | <b>HIV Drug 3</b>                                                                                                                                                                                                                                                                                                                                                                                                                                                                          |                                                                                                                                                                                                                                                                                                                                                                                                                                                                                                                                                                                                                                                                                                                                                                                                                                                                                                                                                                                                                                                                                                                        |                                                                                                                                                                                                                                                                                                                                                                                                                                                                                                                          |                                                                                                                                                                                                                                                                                                                                                                                                                                                                                            |
| 8<br>9<br>10<br>11<br>12<br>13<br>14<br>15<br>16<br>17<br>18<br>19<br>20<br>21<br>22<br>23<br>24                                                                                                                                                                                                                                                                                                                                                                                                                         | <b>3. ARV 3</b><br><i>(Select one)</i>                                                                                                                                                                                                                                                                                                                                                                                                                                                     | <table border="1"> <tr> <td> <input type="checkbox"/> abacavir (ABC)<br/> <input type="checkbox"/> atazanavir (ATV)<br/> <input type="checkbox"/> darunavir (DRV)<br/> <input type="checkbox"/> didanosine (ddI)<br/> <input type="checkbox"/> dolutegravir (DTG)<br/> <input type="checkbox"/> efavirenz (EFV)<br/> <input type="checkbox"/> enfuvirtide (ENF)<br/> <input type="checkbox"/> emtricitabine (FTC)<br/> <input type="checkbox"/> etravirine (ETR)<br/> <input type="checkbox"/> lamivudine (3TC)<br/> <input type="checkbox"/> lopinavir/ritonavir (LPV/r) </td> <td> <input type="checkbox"/> maraviroc (MVC)<br/> <input type="checkbox"/> nevirapine (NVP)<br/> <input type="checkbox"/> raltegravir (RAL)<br/> <input type="checkbox"/> ritonavir (RTV)<br/> <input type="checkbox"/> stavudine (d4T)<br/> <input type="checkbox"/> tenofovir alafenamide (TAF)<br/> <input type="checkbox"/> tenofovir disoproxil fumarate (TDF)<br/> <input type="checkbox"/> tipranavir (TPV)<br/> <input type="checkbox"/> zidovudine (AZT/ZDV)<br/> <input type="checkbox"/> Other: _____ </td> </tr> </table> | <input type="checkbox"/> abacavir (ABC)<br><input type="checkbox"/> atazanavir (ATV)<br><input type="checkbox"/> darunavir (DRV)<br><input type="checkbox"/> didanosine (ddI)<br><input type="checkbox"/> dolutegravir (DTG)<br><input type="checkbox"/> efavirenz (EFV)<br><input type="checkbox"/> enfuvirtide (ENF)<br><input type="checkbox"/> emtricitabine (FTC)<br><input type="checkbox"/> etravirine (ETR)<br><input type="checkbox"/> lamivudine (3TC)<br><input type="checkbox"/> lopinavir/ritonavir (LPV/r) | <input type="checkbox"/> maraviroc (MVC)<br><input type="checkbox"/> nevirapine (NVP)<br><input type="checkbox"/> raltegravir (RAL)<br><input type="checkbox"/> ritonavir (RTV)<br><input type="checkbox"/> stavudine (d4T)<br><input type="checkbox"/> tenofovir alafenamide (TAF)<br><input type="checkbox"/> tenofovir disoproxil fumarate (TDF)<br><input type="checkbox"/> tipranavir (TPV)<br><input type="checkbox"/> zidovudine (AZT/ZDV)<br><input type="checkbox"/> Other: _____ |
| <input type="checkbox"/> abacavir (ABC)<br><input type="checkbox"/> atazanavir (ATV)<br><input type="checkbox"/> darunavir (DRV)<br><input type="checkbox"/> didanosine (ddI)<br><input type="checkbox"/> dolutegravir (DTG)<br><input type="checkbox"/> efavirenz (EFV)<br><input type="checkbox"/> enfuvirtide (ENF)<br><input type="checkbox"/> emtricitabine (FTC)<br><input type="checkbox"/> etravirine (ETR)<br><input type="checkbox"/> lamivudine (3TC)<br><input type="checkbox"/> lopinavir/ritonavir (LPV/r) | <input type="checkbox"/> maraviroc (MVC)<br><input type="checkbox"/> nevirapine (NVP)<br><input type="checkbox"/> raltegravir (RAL)<br><input type="checkbox"/> ritonavir (RTV)<br><input type="checkbox"/> stavudine (d4T)<br><input type="checkbox"/> tenofovir alafenamide (TAF)<br><input type="checkbox"/> tenofovir disoproxil fumarate (TDF)<br><input type="checkbox"/> tipranavir (TPV)<br><input type="checkbox"/> zidovudine (AZT/ZDV)<br><input type="checkbox"/> Other: _____ |                                                                                                                                                                                                                                                                                                                                                                                                                                                                                                                                                                                                                                                                                                                                                                                                                                                                                                                                                                                                                                                                                                                        |                                                                                                                                                                                                                                                                                                                                                                                                                                                                                                                          |                                                                                                                                                                                                                                                                                                                                                                                                                                                                                            |
| 25<br>26<br>27                                                                                                                                                                                                                                                                                                                                                                                                                                                                                                           | 3a. Drug is part of a fixed-dose combination                                                                                                                                                                                                                                                                                                                                                                                                                                               | <input type="checkbox"/> Yes <input type="checkbox"/> No                                                                                                                                                                                                                                                                                                                                                                                                                                                                                                                                                                                                                                                                                                                                                                                                                                                                                                                                                                                                                                                               |                                                                                                                                                                                                                                                                                                                                                                                                                                                                                                                          |                                                                                                                                                                                                                                                                                                                                                                                                                                                                                            |
| 28<br>29<br>30                                                                                                                                                                                                                                                                                                                                                                                                                                                                                                           | 3b. How many times a day is this medication prescribed?                                                                                                                                                                                                                                                                                                                                                                                                                                    | _ _ _                                                                                                                                                                                                                                                                                                                                                                                                                                                                                                                                                                                                                                                                                                                                                                                                                                                                                                                                                                                                                                                                                                                  |                                                                                                                                                                                                                                                                                                                                                                                                                                                                                                                          |                                                                                                                                                                                                                                                                                                                                                                                                                                                                                            |
| 31<br>32<br>33                                                                                                                                                                                                                                                                                                                                                                                                                                                                                                           | 3c. How many days a week is this medication prescribed?                                                                                                                                                                                                                                                                                                                                                                                                                                    | _ _ _                                                                                                                                                                                                                                                                                                                                                                                                                                                                                                                                                                                                                                                                                                                                                                                                                                                                                                                                                                                                                                                                                                                  |                                                                                                                                                                                                                                                                                                                                                                                                                                                                                                                          |                                                                                                                                                                                                                                                                                                                                                                                                                                                                                            |
| 34<br>35<br>36<br>37<br>38<br>39                                                                                                                                                                                                                                                                                                                                                                                                                                                                                         | 3d. Start Date                                                                                                                                                                                                                                                                                                                                                                                                                                                                             | _ _ _ / _ _ _ / _ _ _ _ _ _  (dd/mm/yyyy)<br><input type="checkbox"/> Unknown                                                                                                                                                                                                                                                                                                                                                                                                                                                                                                                                                                                                                                                                                                                                                                                                                                                                                                                                                                                                                                          |                                                                                                                                                                                                                                                                                                                                                                                                                                                                                                                          |                                                                                                                                                                                                                                                                                                                                                                                                                                                                                            |
| 40<br>41<br>42<br>43<br>44<br>45<br>46                                                                                                                                                                                                                                                                                                                                                                                                                                                                                   | 3e. Stop Date                                                                                                                                                                                                                                                                                                                                                                                                                                                                              | _ _ _ / _ _ _ / _ _ _ _ _ _  (dd/mm/yyyy)<br><input type="checkbox"/> Ongoing <i>(Return to update stop date if changed)</i><br><input type="checkbox"/> Unknown                                                                                                                                                                                                                                                                                                                                                                                                                                                                                                                                                                                                                                                                                                                                                                                                                                                                                                                                                       |                                                                                                                                                                                                                                                                                                                                                                                                                                                                                                                          |                                                                                                                                                                                                                                                                                                                                                                                                                                                                                            |
| 47<br>48<br>49<br>50<br>51<br>52<br>53<br>54<br>55<br>56<br>57<br>58<br>59<br>60                                                                                                                                                                                                                                                                                                                                                                                                                                         | 3f. Reason for change or interruption                                                                                                                                                                                                                                                                                                                                                                                                                                                      | <input type="checkbox"/> Drug resistance<br><input type="checkbox"/> Drug interaction<br><input type="checkbox"/> Pregnancy<br><input type="checkbox"/> Side effects or toxicity<br><input type="checkbox"/> Compatibility with TB drugs<br><input type="checkbox"/> Participant stopped taking meds<br><input type="checkbox"/> Lost to follow up<br><input type="checkbox"/> Death<br><input type="checkbox"/> Participant removed from study<br><input type="checkbox"/> Other _____<br><input type="checkbox"/> Unknown                                                                                                                                                                                                                                                                                                                                                                                                                                                                                                                                                                                            |                                                                                                                                                                                                                                                                                                                                                                                                                                                                                                                          |                                                                                                                                                                                                                                                                                                                                                                                                                                                                                            |

|                                                                                                                                                                                                                                                                                                                                                                                                                                                                                                                          |                                                                                                                                                                                                                                                                                                                                                                                                                                                                                                                                                                                                                                                                                                                                                                                                                                                                                                                                                                                                                                                                                                                                                                                                                                                                                                     |                                                                                                                                                                                                                                                                                                                                                                                                                                                                                                                          |                                                                                                                                                                                                                                                                                                                                                                                                                                                                                                |
|--------------------------------------------------------------------------------------------------------------------------------------------------------------------------------------------------------------------------------------------------------------------------------------------------------------------------------------------------------------------------------------------------------------------------------------------------------------------------------------------------------------------------|-----------------------------------------------------------------------------------------------------------------------------------------------------------------------------------------------------------------------------------------------------------------------------------------------------------------------------------------------------------------------------------------------------------------------------------------------------------------------------------------------------------------------------------------------------------------------------------------------------------------------------------------------------------------------------------------------------------------------------------------------------------------------------------------------------------------------------------------------------------------------------------------------------------------------------------------------------------------------------------------------------------------------------------------------------------------------------------------------------------------------------------------------------------------------------------------------------------------------------------------------------------------------------------------------------|--------------------------------------------------------------------------------------------------------------------------------------------------------------------------------------------------------------------------------------------------------------------------------------------------------------------------------------------------------------------------------------------------------------------------------------------------------------------------------------------------------------------------|------------------------------------------------------------------------------------------------------------------------------------------------------------------------------------------------------------------------------------------------------------------------------------------------------------------------------------------------------------------------------------------------------------------------------------------------------------------------------------------------|
| 1<br>2<br>3<br>4<br>5<br>6<br>7<br>8<br>9<br>10<br>11<br>12<br>13<br>14<br>15<br>16<br>17<br>18<br>19<br>20<br>21<br>22<br>23                                                                                                                                                                                                                                                                                                                                                                                            | <b>HIV Drug 4</b>                                                                                                                                                                                                                                                                                                                                                                                                                                                                                                                                                                                                                                                                                                                                                                                                                                                                                                                                                                                                                                                                                                                                                                                                                                                                                   |                                                                                                                                                                                                                                                                                                                                                                                                                                                                                                                          |                                                                                                                                                                                                                                                                                                                                                                                                                                                                                                |
| 24<br>25<br>26<br>27<br>28<br>29<br>30<br>31<br>32<br>33<br>34<br>35<br>36<br>37<br>38                                                                                                                                                                                                                                                                                                                                                                                                                                   | <p>4. ARV 4<br/>(Select one)</p> <table border="1" style="width: 100%;"> <tr> <td style="width: 50%; vertical-align: top;"> <input type="checkbox"/> abacavir (ABC)<br/> <input type="checkbox"/> atazanavir (ATV)<br/> <input type="checkbox"/> darunavir (DRV)<br/> <input type="checkbox"/> didanosine (ddI)<br/> <input type="checkbox"/> dolutegravir (DTG)<br/> <input type="checkbox"/> efavirenz (EFV)<br/> <input type="checkbox"/> enfuvirtide (ENF)<br/> <input type="checkbox"/> emtricitabine (FTC)<br/> <input type="checkbox"/> etravirine (ETR)<br/> <input type="checkbox"/> lamivudine (3TC)<br/> <input type="checkbox"/> lopinavir/ritonavir (LPV/r)                 </td> <td style="width: 50%; vertical-align: top;"> <input type="checkbox"/> maraviroc (MVC)<br/> <input type="checkbox"/> nevirapine (NVP)<br/> <input type="checkbox"/> raltegravir (RAL)<br/> <input type="checkbox"/> ritonavir (RTV)<br/> <input type="checkbox"/> stavudine (d4T)<br/> <input type="checkbox"/> tenofovir alafenamide (TAF)<br/> <input type="checkbox"/> tenofovir disoproxil fumarate (TDF)<br/> <input type="checkbox"/> tipranavir (TPV)<br/> <input type="checkbox"/> zidovudine (AZT/ZDV)<br/><br/> <input type="checkbox"/> Other: _____                 </td> </tr> </table> | <input type="checkbox"/> abacavir (ABC)<br><input type="checkbox"/> atazanavir (ATV)<br><input type="checkbox"/> darunavir (DRV)<br><input type="checkbox"/> didanosine (ddI)<br><input type="checkbox"/> dolutegravir (DTG)<br><input type="checkbox"/> efavirenz (EFV)<br><input type="checkbox"/> enfuvirtide (ENF)<br><input type="checkbox"/> emtricitabine (FTC)<br><input type="checkbox"/> etravirine (ETR)<br><input type="checkbox"/> lamivudine (3TC)<br><input type="checkbox"/> lopinavir/ritonavir (LPV/r) | <input type="checkbox"/> maraviroc (MVC)<br><input type="checkbox"/> nevirapine (NVP)<br><input type="checkbox"/> raltegravir (RAL)<br><input type="checkbox"/> ritonavir (RTV)<br><input type="checkbox"/> stavudine (d4T)<br><input type="checkbox"/> tenofovir alafenamide (TAF)<br><input type="checkbox"/> tenofovir disoproxil fumarate (TDF)<br><input type="checkbox"/> tipranavir (TPV)<br><input type="checkbox"/> zidovudine (AZT/ZDV)<br><br><input type="checkbox"/> Other: _____ |
| <input type="checkbox"/> abacavir (ABC)<br><input type="checkbox"/> atazanavir (ATV)<br><input type="checkbox"/> darunavir (DRV)<br><input type="checkbox"/> didanosine (ddI)<br><input type="checkbox"/> dolutegravir (DTG)<br><input type="checkbox"/> efavirenz (EFV)<br><input type="checkbox"/> enfuvirtide (ENF)<br><input type="checkbox"/> emtricitabine (FTC)<br><input type="checkbox"/> etravirine (ETR)<br><input type="checkbox"/> lamivudine (3TC)<br><input type="checkbox"/> lopinavir/ritonavir (LPV/r) | <input type="checkbox"/> maraviroc (MVC)<br><input type="checkbox"/> nevirapine (NVP)<br><input type="checkbox"/> raltegravir (RAL)<br><input type="checkbox"/> ritonavir (RTV)<br><input type="checkbox"/> stavudine (d4T)<br><input type="checkbox"/> tenofovir alafenamide (TAF)<br><input type="checkbox"/> tenofovir disoproxil fumarate (TDF)<br><input type="checkbox"/> tipranavir (TPV)<br><input type="checkbox"/> zidovudine (AZT/ZDV)<br><br><input type="checkbox"/> Other: _____                                                                                                                                                                                                                                                                                                                                                                                                                                                                                                                                                                                                                                                                                                                                                                                                      |                                                                                                                                                                                                                                                                                                                                                                                                                                                                                                                          |                                                                                                                                                                                                                                                                                                                                                                                                                                                                                                |
| 39<br>40<br>41<br>42<br>43                                                                                                                                                                                                                                                                                                                                                                                                                                                                                               | <p>4a. Drug is part of a fixed-dose combination <input type="checkbox"/> Yes <input type="checkbox"/> No</p>                                                                                                                                                                                                                                                                                                                                                                                                                                                                                                                                                                                                                                                                                                                                                                                                                                                                                                                                                                                                                                                                                                                                                                                        |                                                                                                                                                                                                                                                                                                                                                                                                                                                                                                                          |                                                                                                                                                                                                                                                                                                                                                                                                                                                                                                |
| 44<br>45<br>46<br>47<br>48<br>49<br>50<br>51<br>52<br>53<br>54<br>55<br>56<br>57<br>58<br>59<br>60                                                                                                                                                                                                                                                                                                                                                                                                                       | <p>4b. How many times a day is this medication prescribed?<br/> _ _ _ _ </p> <p>4c. How many days a week is this medication prescribed?<br/> _ _ _ _ </p> <p>4d. Start Date<br/> _ _ _ / _ _ _ / _ _ _ _ _  (dd/mm/yyyy)<br/><input type="checkbox"/> Unknown</p> <p>4e. Stop Date<br/> _ _ _ / _ _ _ / _ _ _ _ _  (dd/mm/yyyy)<br/><input type="checkbox"/> Ongoing (Return to update stop date if changed)<br/><input type="checkbox"/> Unknown</p> <p>4f. Reason for change or interruption</p> <ul style="list-style-type: none"> <li><input type="checkbox"/> Drug resistance</li> <li><input type="checkbox"/> Drug interaction</li> <li><input type="checkbox"/> Pregnancy</li> <li><input type="checkbox"/> Side effects or toxicity</li> <li><input type="checkbox"/> Compatibility with TB drugs</li> <li><input type="checkbox"/> Participant stopped taking meds</li> <li><input type="checkbox"/> Lost to follow up</li> <li><input type="checkbox"/> Death</li> <li><input type="checkbox"/> Participant removed from study</li> <li><input type="checkbox"/> Other _____</li> <li><input type="checkbox"/> Unknown</li> </ul>                                                                                                                                                        |                                                                                                                                                                                                                                                                                                                                                                                                                                                                                                                          |                                                                                                                                                                                                                                                                                                                                                                                                                                                                                                |



|    |                                                                                                                                                                                         |                                                                                                                                                                                                                                                                                                                                                                                                                                                                                                                                                                                                                                                                                                                                                                                                                                                                                                                                                                                             |                                                                                                              |  |
|----|-----------------------------------------------------------------------------------------------------------------------------------------------------------------------------------------|---------------------------------------------------------------------------------------------------------------------------------------------------------------------------------------------------------------------------------------------------------------------------------------------------------------------------------------------------------------------------------------------------------------------------------------------------------------------------------------------------------------------------------------------------------------------------------------------------------------------------------------------------------------------------------------------------------------------------------------------------------------------------------------------------------------------------------------------------------------------------------------------------------------------------------------------------------------------------------------------|--------------------------------------------------------------------------------------------------------------|--|
| 1  | <b>HIV Drug 5</b>                                                                                                                                                                       |                                                                                                                                                                                                                                                                                                                                                                                                                                                                                                                                                                                                                                                                                                                                                                                                                                                                                                                                                                                             |                                                                                                              |  |
| 2  |                                                                                                                                                                                         |                                                                                                                                                                                                                                                                                                                                                                                                                                                                                                                                                                                                                                                                                                                                                                                                                                                                                                                                                                                             |                                                                                                              |  |
| 3  |                                                                                                                                                                                         |                                                                                                                                                                                                                                                                                                                                                                                                                                                                                                                                                                                                                                                                                                                                                                                                                                                                                                                                                                                             |                                                                                                              |  |
| 4  | <b>5. ARV 5</b><br><i>(Select one)</i>                                                                                                                                                  | <input type="checkbox"/> abacavir (ABC) <input type="checkbox"/> maraviroc (MVC)<br><input type="checkbox"/> atazanavir (ATV) <input type="checkbox"/> nevirapine (NVP)<br><input type="checkbox"/> darunavir (DRV) <input type="checkbox"/> raltegravir (RAL)<br><input type="checkbox"/> didanosine (ddl) <input type="checkbox"/> ritonavir (RTV)<br><input type="checkbox"/> dolutegravir (DTG) <input type="checkbox"/> stavudine (d4T)<br><input type="checkbox"/> efavirenz (EFV) <input type="checkbox"/> tenofovir alafenamide (TAF)<br><input type="checkbox"/> enfuvirtide (ENF) <input type="checkbox"/> tenofovir disoproxil fumarate (TDF)<br><input type="checkbox"/> emtricitabine (FTC) <input type="checkbox"/> tipranavir (TPV)<br><input type="checkbox"/> etravirine (ETR) <input type="checkbox"/> zidovudine (AZT/ZDV)<br><input type="checkbox"/> lamivudine (3TC)<br><input type="checkbox"/> lopinavir/ritonavir (LPV/r)<br><input type="checkbox"/> Other: _____ |                                                                                                              |  |
| 5  |                                                                                                                                                                                         |                                                                                                                                                                                                                                                                                                                                                                                                                                                                                                                                                                                                                                                                                                                                                                                                                                                                                                                                                                                             |                                                                                                              |  |
| 6  |                                                                                                                                                                                         |                                                                                                                                                                                                                                                                                                                                                                                                                                                                                                                                                                                                                                                                                                                                                                                                                                                                                                                                                                                             |                                                                                                              |  |
| 7  |                                                                                                                                                                                         |                                                                                                                                                                                                                                                                                                                                                                                                                                                                                                                                                                                                                                                                                                                                                                                                                                                                                                                                                                                             |                                                                                                              |  |
| 8  |                                                                                                                                                                                         |                                                                                                                                                                                                                                                                                                                                                                                                                                                                                                                                                                                                                                                                                                                                                                                                                                                                                                                                                                                             |                                                                                                              |  |
| 9  |                                                                                                                                                                                         |                                                                                                                                                                                                                                                                                                                                                                                                                                                                                                                                                                                                                                                                                                                                                                                                                                                                                                                                                                                             |                                                                                                              |  |
| 10 |                                                                                                                                                                                         |                                                                                                                                                                                                                                                                                                                                                                                                                                                                                                                                                                                                                                                                                                                                                                                                                                                                                                                                                                                             |                                                                                                              |  |
| 11 |                                                                                                                                                                                         |                                                                                                                                                                                                                                                                                                                                                                                                                                                                                                                                                                                                                                                                                                                                                                                                                                                                                                                                                                                             |                                                                                                              |  |
| 12 |                                                                                                                                                                                         |                                                                                                                                                                                                                                                                                                                                                                                                                                                                                                                                                                                                                                                                                                                                                                                                                                                                                                                                                                                             |                                                                                                              |  |
| 13 |                                                                                                                                                                                         |                                                                                                                                                                                                                                                                                                                                                                                                                                                                                                                                                                                                                                                                                                                                                                                                                                                                                                                                                                                             |                                                                                                              |  |
| 14 |                                                                                                                                                                                         |                                                                                                                                                                                                                                                                                                                                                                                                                                                                                                                                                                                                                                                                                                                                                                                                                                                                                                                                                                                             |                                                                                                              |  |
| 15 |                                                                                                                                                                                         |                                                                                                                                                                                                                                                                                                                                                                                                                                                                                                                                                                                                                                                                                                                                                                                                                                                                                                                                                                                             |                                                                                                              |  |
| 16 |                                                                                                                                                                                         |                                                                                                                                                                                                                                                                                                                                                                                                                                                                                                                                                                                                                                                                                                                                                                                                                                                                                                                                                                                             |                                                                                                              |  |
| 17 |                                                                                                                                                                                         |                                                                                                                                                                                                                                                                                                                                                                                                                                                                                                                                                                                                                                                                                                                                                                                                                                                                                                                                                                                             |                                                                                                              |  |
| 18 |                                                                                                                                                                                         |                                                                                                                                                                                                                                                                                                                                                                                                                                                                                                                                                                                                                                                                                                                                                                                                                                                                                                                                                                                             |                                                                                                              |  |
| 19 |                                                                                                                                                                                         |                                                                                                                                                                                                                                                                                                                                                                                                                                                                                                                                                                                                                                                                                                                                                                                                                                                                                                                                                                                             |                                                                                                              |  |
| 20 |                                                                                                                                                                                         |                                                                                                                                                                                                                                                                                                                                                                                                                                                                                                                                                                                                                                                                                                                                                                                                                                                                                                                                                                                             | <b>5a. Drug is part of a fixed-dose combination</b> <input type="checkbox"/> Yes <input type="checkbox"/> No |  |
| 21 |                                                                                                                                                                                         |                                                                                                                                                                                                                                                                                                                                                                                                                                                                                                                                                                                                                                                                                                                                                                                                                                                                                                                                                                                             | <b>5b. How many times a day is this medication prescribed?</b><br> _ _ _ _                                   |  |
| 22 |                                                                                                                                                                                         |                                                                                                                                                                                                                                                                                                                                                                                                                                                                                                                                                                                                                                                                                                                                                                                                                                                                                                                                                                                             | <b>5c. How many days a week is this medication prescribed?</b><br> _ _ _ _                                   |  |
| 23 | <b>5d. Start Date</b><br> _ _ _ / _ _ _ / _ _ _ _ _  (dd/mm/yyyy)<br><input type="checkbox"/> Unknown                                                                                   |                                                                                                                                                                                                                                                                                                                                                                                                                                                                                                                                                                                                                                                                                                                                                                                                                                                                                                                                                                                             |                                                                                                              |  |
| 24 | <b>5e. Stop Date</b><br> _ _ _ / _ _ _ / _ _ _ _ _  (dd/mm/yyyy)<br><input type="checkbox"/> Ongoing <i>(Return to update stop date if changed)</i><br><input type="checkbox"/> Unknown |                                                                                                                                                                                                                                                                                                                                                                                                                                                                                                                                                                                                                                                                                                                                                                                                                                                                                                                                                                                             |                                                                                                              |  |
| 25 | <b>5f. Reason for change or interruption</b>                                                                                                                                            |                                                                                                                                                                                                                                                                                                                                                                                                                                                                                                                                                                                                                                                                                                                                                                                                                                                                                                                                                                                             |                                                                                                              |  |
| 26 | <input type="checkbox"/> Drug resistance                                                                                                                                                |                                                                                                                                                                                                                                                                                                                                                                                                                                                                                                                                                                                                                                                                                                                                                                                                                                                                                                                                                                                             |                                                                                                              |  |
| 27 | <input type="checkbox"/> Drug interaction                                                                                                                                               |                                                                                                                                                                                                                                                                                                                                                                                                                                                                                                                                                                                                                                                                                                                                                                                                                                                                                                                                                                                             |                                                                                                              |  |
| 28 | <input type="checkbox"/> Pregnancy                                                                                                                                                      |                                                                                                                                                                                                                                                                                                                                                                                                                                                                                                                                                                                                                                                                                                                                                                                                                                                                                                                                                                                             |                                                                                                              |  |
| 29 | <input type="checkbox"/> Side effects or toxicity                                                                                                                                       |                                                                                                                                                                                                                                                                                                                                                                                                                                                                                                                                                                                                                                                                                                                                                                                                                                                                                                                                                                                             |                                                                                                              |  |
| 30 | <input type="checkbox"/> Compatibility with TB drugs                                                                                                                                    |                                                                                                                                                                                                                                                                                                                                                                                                                                                                                                                                                                                                                                                                                                                                                                                                                                                                                                                                                                                             |                                                                                                              |  |
| 31 | <input type="checkbox"/> Participant stopped taking meds                                                                                                                                |                                                                                                                                                                                                                                                                                                                                                                                                                                                                                                                                                                                                                                                                                                                                                                                                                                                                                                                                                                                             |                                                                                                              |  |
| 32 | <input type="checkbox"/> Lost to follow up                                                                                                                                              |                                                                                                                                                                                                                                                                                                                                                                                                                                                                                                                                                                                                                                                                                                                                                                                                                                                                                                                                                                                             |                                                                                                              |  |
| 33 | <input type="checkbox"/> Death                                                                                                                                                          |                                                                                                                                                                                                                                                                                                                                                                                                                                                                                                                                                                                                                                                                                                                                                                                                                                                                                                                                                                                             |                                                                                                              |  |
| 34 | <input type="checkbox"/> Participant removed from study                                                                                                                                 |                                                                                                                                                                                                                                                                                                                                                                                                                                                                                                                                                                                                                                                                                                                                                                                                                                                                                                                                                                                             |                                                                                                              |  |
| 35 | <input type="checkbox"/> Other _____                                                                                                                                                    |                                                                                                                                                                                                                                                                                                                                                                                                                                                                                                                                                                                                                                                                                                                                                                                                                                                                                                                                                                                             |                                                                                                              |  |
| 36 | <input type="checkbox"/> Unknown                                                                                                                                                        |                                                                                                                                                                                                                                                                                                                                                                                                                                                                                                                                                                                                                                                                                                                                                                                                                                                                                                                                                                                             |                                                                                                              |  |
| 37 |                                                                                                                                                                                         |                                                                                                                                                                                                                                                                                                                                                                                                                                                                                                                                                                                                                                                                                                                                                                                                                                                                                                                                                                                             |                                                                                                              |  |
| 38 |                                                                                                                                                                                         |                                                                                                                                                                                                                                                                                                                                                                                                                                                                                                                                                                                                                                                                                                                                                                                                                                                                                                                                                                                             |                                                                                                              |  |
| 39 |                                                                                                                                                                                         |                                                                                                                                                                                                                                                                                                                                                                                                                                                                                                                                                                                                                                                                                                                                                                                                                                                                                                                                                                                             |                                                                                                              |  |
| 40 |                                                                                                                                                                                         |                                                                                                                                                                                                                                                                                                                                                                                                                                                                                                                                                                                                                                                                                                                                                                                                                                                                                                                                                                                             |                                                                                                              |  |
| 41 |                                                                                                                                                                                         |                                                                                                                                                                                                                                                                                                                                                                                                                                                                                                                                                                                                                                                                                                                                                                                                                                                                                                                                                                                             |                                                                                                              |  |
| 42 |                                                                                                                                                                                         |                                                                                                                                                                                                                                                                                                                                                                                                                                                                                                                                                                                                                                                                                                                                                                                                                                                                                                                                                                                             |                                                                                                              |  |
| 43 |                                                                                                                                                                                         |                                                                                                                                                                                                                                                                                                                                                                                                                                                                                                                                                                                                                                                                                                                                                                                                                                                                                                                                                                                             |                                                                                                              |  |
| 44 |                                                                                                                                                                                         |                                                                                                                                                                                                                                                                                                                                                                                                                                                                                                                                                                                                                                                                                                                                                                                                                                                                                                                                                                                             |                                                                                                              |  |
| 45 |                                                                                                                                                                                         |                                                                                                                                                                                                                                                                                                                                                                                                                                                                                                                                                                                                                                                                                                                                                                                                                                                                                                                                                                                             |                                                                                                              |  |
| 46 |                                                                                                                                                                                         |                                                                                                                                                                                                                                                                                                                                                                                                                                                                                                                                                                                                                                                                                                                                                                                                                                                                                                                                                                                             |                                                                                                              |  |
| 47 |                                                                                                                                                                                         |                                                                                                                                                                                                                                                                                                                                                                                                                                                                                                                                                                                                                                                                                                                                                                                                                                                                                                                                                                                             |                                                                                                              |  |
| 48 |                                                                                                                                                                                         |                                                                                                                                                                                                                                                                                                                                                                                                                                                                                                                                                                                                                                                                                                                                                                                                                                                                                                                                                                                             |                                                                                                              |  |
| 49 |                                                                                                                                                                                         |                                                                                                                                                                                                                                                                                                                                                                                                                                                                                                                                                                                                                                                                                                                                                                                                                                                                                                                                                                                             |                                                                                                              |  |
| 50 |                                                                                                                                                                                         |                                                                                                                                                                                                                                                                                                                                                                                                                                                                                                                                                                                                                                                                                                                                                                                                                                                                                                                                                                                             |                                                                                                              |  |
| 51 |                                                                                                                                                                                         |                                                                                                                                                                                                                                                                                                                                                                                                                                                                                                                                                                                                                                                                                                                                                                                                                                                                                                                                                                                             |                                                                                                              |  |
| 52 |                                                                                                                                                                                         |                                                                                                                                                                                                                                                                                                                                                                                                                                                                                                                                                                                                                                                                                                                                                                                                                                                                                                                                                                                             |                                                                                                              |  |
| 53 |                                                                                                                                                                                         |                                                                                                                                                                                                                                                                                                                                                                                                                                                                                                                                                                                                                                                                                                                                                                                                                                                                                                                                                                                             |                                                                                                              |  |
| 54 |                                                                                                                                                                                         |                                                                                                                                                                                                                                                                                                                                                                                                                                                                                                                                                                                                                                                                                                                                                                                                                                                                                                                                                                                             |                                                                                                              |  |
| 55 |                                                                                                                                                                                         |                                                                                                                                                                                                                                                                                                                                                                                                                                                                                                                                                                                                                                                                                                                                                                                                                                                                                                                                                                                             |                                                                                                              |  |
| 56 |                                                                                                                                                                                         |                                                                                                                                                                                                                                                                                                                                                                                                                                                                                                                                                                                                                                                                                                                                                                                                                                                                                                                                                                                             |                                                                                                              |  |
| 57 |                                                                                                                                                                                         |                                                                                                                                                                                                                                                                                                                                                                                                                                                                                                                                                                                                                                                                                                                                                                                                                                                                                                                                                                                             |                                                                                                              |  |
| 58 |                                                                                                                                                                                         |                                                                                                                                                                                                                                                                                                                                                                                                                                                                                                                                                                                                                                                                                                                                                                                                                                                                                                                                                                                             |                                                                                                              |  |
| 59 |                                                                                                                                                                                         |                                                                                                                                                                                                                                                                                                                                                                                                                                                                                                                                                                                                                                                                                                                                                                                                                                                                                                                                                                                             |                                                                                                              |  |
| 60 |                                                                                                                                                                                         |                                                                                                                                                                                                                                                                                                                                                                                                                                                                                                                                                                                                                                                                                                                                                                                                                                                                                                                                                                                             |                                                                                                              |  |

|                                                                                                                                                                                                                                                                                                                                                                                                                                                                                                                          |                                                                                                                                                                                                                                                                                                                                                                                                                                                                                                                                                                                                                                                                                                                                                                                                                                                                                                                                                                                                                                                                                                                                                                                                                                                                                                     |                                                                                                                                                                                                                                                                                                                                                                                                                                                                                                                          |                                                                                                                                                                                                                                                                                                                                                                                                                                                                                                |
|--------------------------------------------------------------------------------------------------------------------------------------------------------------------------------------------------------------------------------------------------------------------------------------------------------------------------------------------------------------------------------------------------------------------------------------------------------------------------------------------------------------------------|-----------------------------------------------------------------------------------------------------------------------------------------------------------------------------------------------------------------------------------------------------------------------------------------------------------------------------------------------------------------------------------------------------------------------------------------------------------------------------------------------------------------------------------------------------------------------------------------------------------------------------------------------------------------------------------------------------------------------------------------------------------------------------------------------------------------------------------------------------------------------------------------------------------------------------------------------------------------------------------------------------------------------------------------------------------------------------------------------------------------------------------------------------------------------------------------------------------------------------------------------------------------------------------------------------|--------------------------------------------------------------------------------------------------------------------------------------------------------------------------------------------------------------------------------------------------------------------------------------------------------------------------------------------------------------------------------------------------------------------------------------------------------------------------------------------------------------------------|------------------------------------------------------------------------------------------------------------------------------------------------------------------------------------------------------------------------------------------------------------------------------------------------------------------------------------------------------------------------------------------------------------------------------------------------------------------------------------------------|
| 1<br>2<br>3<br>4<br>5<br>6<br>7<br>8<br>9<br>10<br>11<br>12<br>13<br>14<br>15<br>16<br>17<br>18<br>19<br>20<br>21<br>22<br>23                                                                                                                                                                                                                                                                                                                                                                                            | <b>HIV Drug 6</b>                                                                                                                                                                                                                                                                                                                                                                                                                                                                                                                                                                                                                                                                                                                                                                                                                                                                                                                                                                                                                                                                                                                                                                                                                                                                                   |                                                                                                                                                                                                                                                                                                                                                                                                                                                                                                                          |                                                                                                                                                                                                                                                                                                                                                                                                                                                                                                |
| 24<br>25<br>26<br>27<br>28<br>29<br>30<br>31<br>32<br>33<br>34<br>35<br>36<br>37<br>38                                                                                                                                                                                                                                                                                                                                                                                                                                   | <p>6. ARV 6<br/>(Select one)</p> <table border="1" style="width: 100%;"> <tr> <td style="width: 50%; vertical-align: top;"> <input type="checkbox"/> abacavir (ABC)<br/> <input type="checkbox"/> atazanavir (ATV)<br/> <input type="checkbox"/> darunavir (DRV)<br/> <input type="checkbox"/> didanosine (ddI)<br/> <input type="checkbox"/> dolutegravir (DTG)<br/> <input type="checkbox"/> efavirenz (EFV)<br/> <input type="checkbox"/> enfuvirtide (ENF)<br/> <input type="checkbox"/> emtricitabine (FTC)<br/> <input type="checkbox"/> etravirine (ETR)<br/> <input type="checkbox"/> lamivudine (3TC)<br/> <input type="checkbox"/> lopinavir/ritonavir (LPV/r)                 </td> <td style="width: 50%; vertical-align: top;"> <input type="checkbox"/> maraviroc (MVC)<br/> <input type="checkbox"/> nevirapine (NVP)<br/> <input type="checkbox"/> raltegravir (RAL)<br/> <input type="checkbox"/> ritonavir (RTV)<br/> <input type="checkbox"/> stavudine (d4T)<br/> <input type="checkbox"/> tenofovir alafenamide (TAF)<br/> <input type="checkbox"/> tenofovir disoproxil fumarate (TDF)<br/> <input type="checkbox"/> tipranavir (TPV)<br/> <input type="checkbox"/> zidovudine (AZT/ZDV)<br/><br/> <input type="checkbox"/> Other: _____                 </td> </tr> </table> | <input type="checkbox"/> abacavir (ABC)<br><input type="checkbox"/> atazanavir (ATV)<br><input type="checkbox"/> darunavir (DRV)<br><input type="checkbox"/> didanosine (ddI)<br><input type="checkbox"/> dolutegravir (DTG)<br><input type="checkbox"/> efavirenz (EFV)<br><input type="checkbox"/> enfuvirtide (ENF)<br><input type="checkbox"/> emtricitabine (FTC)<br><input type="checkbox"/> etravirine (ETR)<br><input type="checkbox"/> lamivudine (3TC)<br><input type="checkbox"/> lopinavir/ritonavir (LPV/r) | <input type="checkbox"/> maraviroc (MVC)<br><input type="checkbox"/> nevirapine (NVP)<br><input type="checkbox"/> raltegravir (RAL)<br><input type="checkbox"/> ritonavir (RTV)<br><input type="checkbox"/> stavudine (d4T)<br><input type="checkbox"/> tenofovir alafenamide (TAF)<br><input type="checkbox"/> tenofovir disoproxil fumarate (TDF)<br><input type="checkbox"/> tipranavir (TPV)<br><input type="checkbox"/> zidovudine (AZT/ZDV)<br><br><input type="checkbox"/> Other: _____ |
| <input type="checkbox"/> abacavir (ABC)<br><input type="checkbox"/> atazanavir (ATV)<br><input type="checkbox"/> darunavir (DRV)<br><input type="checkbox"/> didanosine (ddI)<br><input type="checkbox"/> dolutegravir (DTG)<br><input type="checkbox"/> efavirenz (EFV)<br><input type="checkbox"/> enfuvirtide (ENF)<br><input type="checkbox"/> emtricitabine (FTC)<br><input type="checkbox"/> etravirine (ETR)<br><input type="checkbox"/> lamivudine (3TC)<br><input type="checkbox"/> lopinavir/ritonavir (LPV/r) | <input type="checkbox"/> maraviroc (MVC)<br><input type="checkbox"/> nevirapine (NVP)<br><input type="checkbox"/> raltegravir (RAL)<br><input type="checkbox"/> ritonavir (RTV)<br><input type="checkbox"/> stavudine (d4T)<br><input type="checkbox"/> tenofovir alafenamide (TAF)<br><input type="checkbox"/> tenofovir disoproxil fumarate (TDF)<br><input type="checkbox"/> tipranavir (TPV)<br><input type="checkbox"/> zidovudine (AZT/ZDV)<br><br><input type="checkbox"/> Other: _____                                                                                                                                                                                                                                                                                                                                                                                                                                                                                                                                                                                                                                                                                                                                                                                                      |                                                                                                                                                                                                                                                                                                                                                                                                                                                                                                                          |                                                                                                                                                                                                                                                                                                                                                                                                                                                                                                |
| 39<br>40<br>41<br>42<br>43                                                                                                                                                                                                                                                                                                                                                                                                                                                                                               | <p>6a. Drug is part of a fixed-dose combination <input type="checkbox"/> Yes <input type="checkbox"/> No</p>                                                                                                                                                                                                                                                                                                                                                                                                                                                                                                                                                                                                                                                                                                                                                                                                                                                                                                                                                                                                                                                                                                                                                                                        |                                                                                                                                                                                                                                                                                                                                                                                                                                                                                                                          |                                                                                                                                                                                                                                                                                                                                                                                                                                                                                                |
| 44<br>45<br>46<br>47<br>48<br>49<br>50<br>51<br>52<br>53<br>54<br>55<br>56<br>57<br>58<br>59<br>60                                                                                                                                                                                                                                                                                                                                                                                                                       | <p>6b. How many times a day is this medication prescribed?<br/> _ _ _ </p> <p>6c. How many days a week is this medication prescribed?<br/> _ _ _ </p> <p>6d. Start Date<br/> _ _ / _ _ / _ _ _ _  (dd/mm/yyyy)<br/><input type="checkbox"/> Unknown</p> <p>6e. Stop Date<br/> _ _ / _ _ / _ _ _ _  (dd/mm/yyyy)<br/><input type="checkbox"/> Ongoing (Return to update stop date if changed)<br/><input type="checkbox"/> Unknown</p> <p>6f. Reason for change or interruption</p> <ul style="list-style-type: none"> <li><input type="checkbox"/> Drug resistance</li> <li><input type="checkbox"/> Drug interaction</li> <li><input type="checkbox"/> Pregnancy</li> <li><input type="checkbox"/> Side effects or toxicity</li> <li><input type="checkbox"/> Compatibility with TB drugs</li> <li><input type="checkbox"/> Participant stopped taking meds</li> <li><input type="checkbox"/> Lost to follow up</li> <li><input type="checkbox"/> Death</li> <li><input type="checkbox"/> Participant removed from study</li> <li><input type="checkbox"/> Other _____</li> <li><input type="checkbox"/> Unknown</li> </ul>                                                                                                                                                                        |                                                                                                                                                                                                                                                                                                                                                                                                                                                                                                                          |                                                                                                                                                                                                                                                                                                                                                                                                                                                                                                |

|                                                                                                                |                                                         |                                                                                                                                                                                                                                                                                                                                                                                                                                                                                                                                                                                                                                                                                                                                                                                                                                                                                                                                                                                          |
|----------------------------------------------------------------------------------------------------------------|---------------------------------------------------------|------------------------------------------------------------------------------------------------------------------------------------------------------------------------------------------------------------------------------------------------------------------------------------------------------------------------------------------------------------------------------------------------------------------------------------------------------------------------------------------------------------------------------------------------------------------------------------------------------------------------------------------------------------------------------------------------------------------------------------------------------------------------------------------------------------------------------------------------------------------------------------------------------------------------------------------------------------------------------------------|
| 1<br>2<br>3                                                                                                    | <b>HIV Drug 7</b>                                       |                                                                                                                                                                                                                                                                                                                                                                                                                                                                                                                                                                                                                                                                                                                                                                                                                                                                                                                                                                                          |
| 4<br>5<br>6<br>7<br>8<br>9<br>10<br>11<br>12<br>13<br>14<br>15<br>16<br>17<br>18<br>19<br>20<br>21<br>22<br>23 | 7. ARV 7<br>(Select one)                                | <input type="checkbox"/> abacavir (ABC) <input type="checkbox"/> maraviroc (MVC)<br><input type="checkbox"/> atazanavir (ATV) <input type="checkbox"/> nevirapine (NVP)<br><input type="checkbox"/> darunavir (DRV) <input type="checkbox"/> raltegravir (RAL)<br><input type="checkbox"/> didanosine (ddI) <input type="checkbox"/> ritonavir (RTV)<br><input type="checkbox"/> dolutegravir (DTG) <input type="checkbox"/> stavudine (d4T)<br><input type="checkbox"/> efavirenz (EFV) <input type="checkbox"/> tenofovir alafenamide (TAF)<br><input type="checkbox"/> enfuvirtide (ENF) <input type="checkbox"/> tenofovir disoproxil fumarate (TDF)<br><input type="checkbox"/> emtricitabine (FTC) <input type="checkbox"/> tipranavir (TPV)<br><input type="checkbox"/> etravirine (ETR) <input type="checkbox"/> zidovudine (AZT/ZDV)<br><input type="checkbox"/> lamivudine (3TC) <input type="checkbox"/> Other: _____<br><input type="checkbox"/> lopinavir/ritonavir (LPV/r) |
| 24<br>25<br>26<br>27                                                                                           | 7a. Drug is part of a fixed-dose combination            | <input type="checkbox"/> Yes <input type="checkbox"/> No                                                                                                                                                                                                                                                                                                                                                                                                                                                                                                                                                                                                                                                                                                                                                                                                                                                                                                                                 |
| 28<br>29<br>30                                                                                                 | 7b. How many times a day is this medication prescribed? | _ _ _                                                                                                                                                                                                                                                                                                                                                                                                                                                                                                                                                                                                                                                                                                                                                                                                                                                                                                                                                                                    |
| 31<br>32<br>33                                                                                                 | 7c. How many days a week is this medication prescribed? | _ _ _                                                                                                                                                                                                                                                                                                                                                                                                                                                                                                                                                                                                                                                                                                                                                                                                                                                                                                                                                                                    |
| 34<br>35<br>36<br>37<br>38                                                                                     | 7d. Start Date                                          | _ _ / _ _ / _ _ _ _  (dd/mm/yyyy)<br><input type="checkbox"/> Unknown                                                                                                                                                                                                                                                                                                                                                                                                                                                                                                                                                                                                                                                                                                                                                                                                                                                                                                                    |
| 39<br>40<br>41<br>42<br>43                                                                                     | 7e. Stop Date                                           | _ _ / _ _ / _ _ _ _  (dd/mm/yyyy)<br><input type="checkbox"/> Ongoing (Return to update stop date if changed)<br><input type="checkbox"/> Unknown                                                                                                                                                                                                                                                                                                                                                                                                                                                                                                                                                                                                                                                                                                                                                                                                                                        |
| 44<br>45<br>46<br>47<br>48<br>49<br>50<br>51<br>52<br>53<br>54<br>55<br>56<br>57<br>58<br>59<br>60             | 7f. Reason for change or interruption                   | <input type="checkbox"/> Drug resistance<br><input type="checkbox"/> Drug interaction<br><input type="checkbox"/> Pregnancy<br><input type="checkbox"/> Side effects or toxicity<br><input type="checkbox"/> Compatibility with TB drugs<br><input type="checkbox"/> Participant stopped taking meds<br><input type="checkbox"/> Lost to follow up<br><input type="checkbox"/> Death<br><input type="checkbox"/> Participant removed from study<br><input type="checkbox"/> Other _____<br><input type="checkbox"/> Unknown                                                                                                                                                                                                                                                                                                                                                                                                                                                              |

Investigator: \_\_\_\_\_ Signature: \_\_\_\_\_ Date |\_|\_|/|\_|\_|/|\_|\_|\_|\_|

**Note – in the case of adolescents younger than age 18:** assess adolescent disclosure status before proceeding.  
Follow procedures for avoiding accidental disclosure to adolescents.

| [23] ANTIRETROVIRAL TREATMENT ADHERENCE                                                    |                                                                                                                                                                                                                                                                                                                                                                                                                                                                                                                                                                                                                                                                                                                                                                                                                                                                           |
|--------------------------------------------------------------------------------------------|---------------------------------------------------------------------------------------------------------------------------------------------------------------------------------------------------------------------------------------------------------------------------------------------------------------------------------------------------------------------------------------------------------------------------------------------------------------------------------------------------------------------------------------------------------------------------------------------------------------------------------------------------------------------------------------------------------------------------------------------------------------------------------------------------------------------------------------------------------------------------|
| <b>leDEA/TB SRN ID</b>                                                                     |                                                                                                                                                                                                                                                                                                                                                                                                                                                                                                                                                                                                                                                                                                                                                                                                                                                                           |
| Visit                                                                                      | <input type="checkbox"/> Baseline<br><input type="checkbox"/> Month 1<br><input type="checkbox"/> Month 2<br><input type="checkbox"/> End of Tx<br><input type="checkbox"/> 6-M Post-Tx<br><input type="checkbox"/> 12-M Post-Tx<br><input type="checkbox"/> Tx F/R/W                                                                                                                                                                                                                                                                                                                                                                                                                                                                                                                                                                                                     |
| Visit date (dd/mm/yyyy)                                                                    | _ _ / _ _ / _ _ _ _                                                                                                                                                                                                                                                                                                                                                                                                                                                                                                                                                                                                                                                                                                                                                                                                                                                       |
| <b>Adherence questions</b>                                                                 |                                                                                                                                                                                                                                                                                                                                                                                                                                                                                                                                                                                                                                                                                                                                                                                                                                                                           |
| 1. Any dose of ART missed in the last 4 days                                               | <input type="checkbox"/> Yes<br><input type="checkbox"/> No<br><input type="checkbox"/> Unknown                                                                                                                                                                                                                                                                                                                                                                                                                                                                                                                                                                                                                                                                                                                                                                           |
| 2. If yes, number of ART doses missed in the last 4 days                                   | _ _                                                                                                                                                                                                                                                                                                                                                                                                                                                                                                                                                                                                                                                                                                                                                                                                                                                                       |
| 3. Any dose of ART missed in the last 30 days?                                             | <input type="checkbox"/> Yes<br><input type="checkbox"/> No<br><input type="checkbox"/> Unknown                                                                                                                                                                                                                                                                                                                                                                                                                                                                                                                                                                                                                                                                                                                                                                           |
| <b>Pill count for ART drugs</b>                                                            |                                                                                                                                                                                                                                                                                                                                                                                                                                                                                                                                                                                                                                                                                                                                                                                                                                                                           |
| 4. Date of last ART refill (dd/mm/yyyy)                                                    | _ _ / _ _ / _ _ _ _  <input type="checkbox"/> Unknown                                                                                                                                                                                                                                                                                                                                                                                                                                                                                                                                                                                                                                                                                                                                                                                                                     |
| 5. Expected number of tablets taken daily for ART since last refill                        | _ _  <input type="checkbox"/> Unknown                                                                                                                                                                                                                                                                                                                                                                                                                                                                                                                                                                                                                                                                                                                                                                                                                                     |
| 6. Number of tablets at last refill (tablets given + tablets patient already had)          | _ _ _  <input type="checkbox"/> Unknown                                                                                                                                                                                                                                                                                                                                                                                                                                                                                                                                                                                                                                                                                                                                                                                                                                   |
| 7. Number of tablets brought back                                                          | _ _ _  <input type="checkbox"/> Unknown                                                                                                                                                                                                                                                                                                                                                                                                                                                                                                                                                                                                                                                                                                                                                                                                                                   |
| 8. Description of any adherence challenges for ART regimen ( <i>Check all that apply</i> ) | <input type="checkbox"/> Forgetting dose(s)<br><input type="checkbox"/> Difficulty tolerating medication(s) / side effects<br><input type="checkbox"/> Unable to take medication(s) while feeling ill or unwell<br><input type="checkbox"/> Unable to take medication(s) due to not having food<br><input type="checkbox"/> Did not have privacy / unable to take medication(s) while around others<br><input type="checkbox"/> Not willing to take medication(s)<br><input type="checkbox"/> Did not have medication(s) with me at the time for dose<br><input type="checkbox"/> Did not have a sufficient supply of medication(s)<br><input type="checkbox"/> Medication(s) have not been available from pharmacy (e.g., stock-out)<br><input type="checkbox"/> Other (specify) _____<br><input type="checkbox"/> Unknown<br><input type="checkbox"/> Decline to answer |

Investigator: \_\_\_\_\_ Signature: \_\_\_\_\_ Date: |\_|\_|/|\_|\_|/|\_|\_|\_|\_|

| [24] OTHER RESEARCH                                                                                                   |                                                                                                 |
|-----------------------------------------------------------------------------------------------------------------------|-------------------------------------------------------------------------------------------------|
| <b>IeDEA/TB SRN ID</b>                                                                                                |                                                                                                 |
| Type of visit                                                                                                         | <input type="checkbox"/> Baseline                                                               |
| Visit date (dd/mm/yyyy)                                                                                               | _ _ / _ _ / _ _ _ _                                                                             |
| Complete only for participants enrolled in other research:                                                            |                                                                                                 |
| 1. Name or short description of the other study                                                                       | .....<br>.....<br>.....                                                                         |
| 2. Does the other research include a medical intervention?                                                            | <input type="checkbox"/> Yes<br><input type="checkbox"/> No<br><input type="checkbox"/> Unknown |
| 2a. If yes, specify medical interventions in each research study for which the individual is co-enrolled.             | .....<br>.....<br>.....<br>.....                                                                |
| 3. Does the other research include a care support intervention?                                                       | <input type="checkbox"/> Yes<br><input type="checkbox"/> No<br><input type="checkbox"/> Unknown |
| 3a. If yes, specify care support interventions in each research study for which the individual is co-enrolled.        | .....<br>.....<br>.....<br>.....                                                                |
| 4. Any other support or service provided by the other research?                                                       | <input type="checkbox"/> Yes<br><input type="checkbox"/> No<br><input type="checkbox"/> Unknown |
| 4a. If yes, specify other support or service provided in each research study for which the individual is co-enrolled. | .....<br>.....<br>.....<br>.....                                                                |

Investigator: \_\_\_\_\_ Signature: \_\_\_\_\_ Date |\_|\_|/|\_|\_|/|\_|\_|\_|\_|

ID Number \_\_\_\_\_  
v1.0 26Jul2022

Other Research Page 1 of 1

| <b>[25] Adverse Event Form</b>                                  |                                                                                                                                                                                                                                              |
|-----------------------------------------------------------------|----------------------------------------------------------------------------------------------------------------------------------------------------------------------------------------------------------------------------------------------|
| Complete one form for each adverse event (AE)                   |                                                                                                                                                                                                                                              |
| <b>leDEA/TB SRN ID</b>                                          |                                                                                                                                                                                                                                              |
| Visit                                                           | <input type="checkbox"/> Month 1<br><input type="checkbox"/> Month 2<br><input type="checkbox"/> End of Tx<br><input type="checkbox"/> Tx F/R/W                                                                                              |
| 1. Has an Adverse Event been noted for this participant?        | <input type="checkbox"/> Yes (if yes, fill below) <input type="checkbox"/> No <input type="checkbox"/> Unknown                                                                                                                               |
| 2. Form completion date                                         | ___/___/____ (dd/mm/yyyy)                                                                                                                                                                                                                    |
| 3. Event brief description (signs, symptoms, syndrome)          |                                                                                                                                                                                                                                              |
| 4. Start date (dd/mm/yyyy)                                      | ___/___/____                                                                                                                                                                                                                                 |
| 5. Resolved                                                     | <input type="checkbox"/> Yes <input type="checkbox"/> No, ongoing <input type="checkbox"/> No, deceased or lost-to-follow up before resolution                                                                                               |
| 5a. If yes, end date / resolution (dd/mm/yyyy)                  | ___/___/____                                                                                                                                                                                                                                 |
| 6. Type of AE (check all that apply)                            | <input type="checkbox"/> Dermatologic system (e.g., rash)<br><input type="checkbox"/> Hepatic system (e.g., Drug Induced Liver Injury)<br><input type="checkbox"/> Nervous system<br><input type="checkbox"/> Other: _____                   |
| 7. Summary of this AE                                           |                                                                                                                                                                                                                                              |
| 8. Severity grading (DAIDS)                                     | <input type="checkbox"/> 1 (mild)<br><input type="checkbox"/> 2 (moderate)<br><input type="checkbox"/> 3 (severe)<br><input type="checkbox"/> 4 (life-threatening)                                                                           |
| 9. Adverse drug reaction related to TB Tx                       | <input type="checkbox"/> Related / Defined <input type="checkbox"/> Unlikely / Doubtful<br><input type="checkbox"/> Likely <input type="checkbox"/> Not related<br><input type="checkbox"/> Possible <input type="checkbox"/> Not applicable |
| 10. Adverse drug reaction related to ARVs (if positive for HIV) | <input type="checkbox"/> Related / Defined <input type="checkbox"/> Unlikely / Doubtful<br><input type="checkbox"/> Likely <input type="checkbox"/> Not related<br><input type="checkbox"/> Possible <input type="checkbox"/> Not applicable |
| 11. Final diagnosis                                             |                                                                                                                                                                                                                                              |
| Notes (optional)                                                |                                                                                                                                                                                                                                              |

Investigator: \_\_\_\_\_ Signature: \_\_\_\_\_ Date \_\_\_/\_\_\_/\_\_\_\_

| [26] TB IRIS                                                                                                                              |                                                                                                                                                                                                                                    |
|-------------------------------------------------------------------------------------------------------------------------------------------|------------------------------------------------------------------------------------------------------------------------------------------------------------------------------------------------------------------------------------|
| <b>IeDEA/TB SRN ID</b>                                                                                                                    |                                                                                                                                                                                                                                    |
| Visit                                                                                                                                     | <input type="checkbox"/> Month 1<br><input type="checkbox"/> Month 2                                                                                                                                                               |
| Form completion date<br>(dd/mm/yyyy)                                                                                                      | _ _ / _ _ / _ _ _ _                                                                                                                                                                                                                |
| <b>IRIS/paradoxical reaction</b>                                                                                                          |                                                                                                                                                                                                                                    |
| 1. Suspicion of IRIS/paradoxical reaction ( <i>New/worsened lymphadenopathy, or respiratory, abdominal, or neurological TB symptoms</i> ) | <input type="checkbox"/> Yes (if yes, fill IRIS section below)<br><input type="checkbox"/> No (END of form)                                                                                                                        |
| 2. Date of IRIS suspicion<br>(dd/mm/yyyy)                                                                                                 | _ _ / _ _ / _ _ _ _                                                                                                                                                                                                                |
| 3. Fever (as of date of IRIS suspicion)                                                                                                   | <input type="checkbox"/> Yes new (since previous visit)<br><input type="checkbox"/> Yes worsened (from previous visit)<br><input type="checkbox"/> Yes unchanged (from previous visit)<br><input type="checkbox"/> No              |
| 4. Peripheral lymphadenopathies (as of date of IRIS suspicion)                                                                            | <input type="checkbox"/> Yes new (since previous visit)<br><input type="checkbox"/> Yes worsened (from previous visit)<br><input type="checkbox"/> Yes unchanged (from previous visit)<br><input type="checkbox"/> No (SKIP to #5) |
| 4a. If yes, clinical aspect<br>( <i>Check one</i> )                                                                                       | <input type="checkbox"/> Swollen<br><input type="checkbox"/> Inflammatory<br><input type="checkbox"/> Suppurative<br><input type="checkbox"/> Necrotic                                                                             |
| 4b. If yes, location<br>( <i>Check all that apply</i> )                                                                                   | <input type="checkbox"/> Cervical<br><input type="checkbox"/> Axillary<br><input type="checkbox"/> Inguinal<br><input type="checkbox"/> Other                                                                                      |
| 5. Abdominal pain<br>( <i>as of date of IRIS suspicion</i> )                                                                              | <input type="checkbox"/> Yes new (since previous visit)<br><input type="checkbox"/> Yes worsened (from previous visit)<br><input type="checkbox"/> Yes unchanged (from previous visit)<br><input type="checkbox"/> No              |
| 6. Central nervous system disorders<br>( <i>as of date of IRIS suspicion</i> )                                                            | <input type="checkbox"/> Yes new (since previous visit)<br><input type="checkbox"/> Yes worsened (from previous visit)<br><input type="checkbox"/> Yes unchanged (from previous visit)<br><input type="checkbox"/> No (SKIP to #7) |
| 6a. If yes, type of symptoms                                                                                                              | <input type="checkbox"/> Coma<br><input type="checkbox"/> Meningitis<br><input type="checkbox"/> Hemiplegia                                                                                                                        |

ID Number: \_\_\_\_\_

v1.0 26Jul2022

For peer review only - <http://bmjopen.bmj.com/site/about/guidelines.xhtml>

TB IRIS Page 1 of 2

|                                                                                               |                                                                                                                                                                                                                                                                                                                                |
|-----------------------------------------------------------------------------------------------|--------------------------------------------------------------------------------------------------------------------------------------------------------------------------------------------------------------------------------------------------------------------------------------------------------------------------------|
|                                                                                               | <input type="checkbox"/> Hemiparesis<br><input type="checkbox"/> Other: .....                                                                                                                                                                                                                                                  |
| 7. Respiratory symptoms (e.g., cough, dyspnea, stridor) <i>(as of date of IRIS suspicion)</i> | <input type="checkbox"/> Yes new (since previous visit)<br><input type="checkbox"/> Yes worsened (from previous visit)<br><input type="checkbox"/> Yes unchanged (from previous visit)<br><input type="checkbox"/> No                                                                                                          |
| 8. Chest X-ray abnormalities <i>(If chest x-ray done, fill <b>CXR Form</b>)</i>               | <input type="checkbox"/> Yes new (since previous visit)<br><input type="checkbox"/> Yes worsened (from previous visit)<br><input type="checkbox"/> Yes unchanged (from previous visit)<br><input type="checkbox"/> No<br><input type="checkbox"/> CXR not performed                                                            |
| 9. Abdominal Ultrasound abnormalities                                                         | <input type="checkbox"/> Yes<br><input type="checkbox"/> No<br><input type="checkbox"/> Ultrasound not performed (SKIP to #10)                                                                                                                                                                                                 |
| 9a. Date of abdominal ultrasound <i>(dd/mm/yyyy)</i>                                          | _ _ / _ _ / _ _ _ _                                                                                                                                                                                                                                                                                                            |
| 9b. If yes to abnormalities, abdominal ultrasound findings <i>(Check all that apply)</i>      | <input type="checkbox"/> Abdominal adenopathy<br><input type="checkbox"/> Pleural effusion<br><input type="checkbox"/> Peritoneal effusion<br><input type="checkbox"/> Other .....                                                                                                                                             |
| 10. CT scan abnormalities                                                                     | <input type="checkbox"/> Yes<br><input type="checkbox"/> No<br><input type="checkbox"/> CT scan not performed (SKIP to #11)                                                                                                                                                                                                    |
| 10a. Type of CT scan <i>(Check all that apply)</i>                                            | <input type="checkbox"/> Abdominal<br><input type="checkbox"/> Cerebral<br><input type="checkbox"/> Thoracic                                                                                                                                                                                                                   |
| 10b. Date of CT scan <i>(dd/mm/yyyy)</i>                                                      | _ _ / _ _ / _ _ _ _                                                                                                                                                                                                                                                                                                            |
| 10c. If yes to abnormalities, CT abnormalities <i>(Check all that apply)</i>                  | <input type="checkbox"/> Abdominal adenopathy<br><input type="checkbox"/> Mediastinal adenopathy<br><input type="checkbox"/> Pulmonary infiltrates<br><input type="checkbox"/> Pleural effusion<br><input type="checkbox"/> Peritoneal effusion<br><input type="checkbox"/> Brain mass<br><input type="checkbox"/> Other ..... |
| 11. Treatment for IRIS initiated                                                              | <input type="checkbox"/> NSAID<br><input type="checkbox"/> Steroids<br><input type="checkbox"/> None                                                                                                                                                                                                                           |
| 12. Date of initiation of treatment for IRIS <i>(dd/mm/yyyy)</i>                              | _ _ / _ _ / _ _ _ _                                                                                                                                                                                                                                                                                                            |

Investigator: \_\_\_\_\_ Signature: \_\_\_\_\_ Date |\_|\_|/|\_|\_|/|\_|\_|\_|\_|

ID Number: \_\_\_\_\_

TB IRIS Page 2 of 2



| <b>[27] TREATMENT OUTCOMES</b>                                                                              |                                                                                                                                                                                                                                                                                                                                                                                                                                                                                                              |
|-------------------------------------------------------------------------------------------------------------|--------------------------------------------------------------------------------------------------------------------------------------------------------------------------------------------------------------------------------------------------------------------------------------------------------------------------------------------------------------------------------------------------------------------------------------------------------------------------------------------------------------|
| leDEA/TB SRN ID                                                                                             |                                                                                                                                                                                                                                                                                                                                                                                                                                                                                                              |
| Visit                                                                                                       | <input type="checkbox"/> End of Tx<br><input type="checkbox"/> Tx F/R/W                                                                                                                                                                                                                                                                                                                                                                                                                                      |
| <b>TB treatment outcome</b>                                                                                 |                                                                                                                                                                                                                                                                                                                                                                                                                                                                                                              |
| 1. Duration of intensive phase<br>(Report dates and Tx received in TB Tx form)                              | <input type="checkbox"/> 2 months (standard intensive phase for DS-TB)<br><input type="checkbox"/> Other duration, specify:<br> _ _ _ . _ _  months                                                                                                                                                                                                                                                                                                                                                          |
| 2. Duration of maintenance phase<br>(Report dates and Tx received in TB Tx form)                            | <input type="checkbox"/> 4 months (standard maintenance phase for DS-TB)<br><input type="checkbox"/> Other duration, specify:<br> _ _ _ . _ _  months                                                                                                                                                                                                                                                                                                                                                        |
| 3. Suspicion of treatment failure                                                                           | <input type="checkbox"/> Yes → Complete <b>Tx F/R/W Visit</b> (and associated forms)<br><input type="checkbox"/> No (SKIP TO #7)                                                                                                                                                                                                                                                                                                                                                                             |
| 4. Date of clinical suspicion<br>(dd/mm/yyyy; as documented in TB clinic record)                            | _ _ _ / _ _ _ / _ _ _ _ _                                                                                                                                                                                                                                                                                                                                                                                                                                                                                    |
| 5. Additional microbiological testing requested by clinician                                                | <input type="checkbox"/> Yes (report results in <b>TB Microbiology</b> form)<br><input type="checkbox"/> No                                                                                                                                                                                                                                                                                                                                                                                                  |
| 6. Additional chest X-ray requested                                                                         | <input type="checkbox"/> Yes (report results in <b>Chest X-ray</b> form)<br><input type="checkbox"/> No                                                                                                                                                                                                                                                                                                                                                                                                      |
| <b>TB Tx Outcome at Study Site</b>                                                                          |                                                                                                                                                                                                                                                                                                                                                                                                                                                                                                              |
| 7. TB treatment outcomes<br>(based on WHO/IUATLD definitions)                                               | <input type="checkbox"/> Cured<br><input type="checkbox"/> Treatment completed<br><input type="checkbox"/> Treatment failed<br><input type="checkbox"/> Died (any cause)<br><input type="checkbox"/> Lost to follow-up<br><input type="checkbox"/> Transferred out from study site → Complete <b>Outcome from transfer site, below</b><br><input type="checkbox"/> Not known                                                                                                                                 |
| 8. Date of TB treatment outcome from study site                                                             | _ _ _ / _ _ _ / _ _ _ _ _  (dd/mm/yyyy)                                                                                                                                                                                                                                                                                                                                                                                                                                                                      |
| <b>TB Tx Outcome obtained from transfer site</b>                                                            | <b>ONLY to be completed for participants who transferred out from the study site – outcome based on follow-up with transfer site</b>                                                                                                                                                                                                                                                                                                                                                                         |
| 9. Name of site where transferred out                                                                       | .....                                                                                                                                                                                                                                                                                                                                                                                                                                                                                                        |
| 10. Outcome of treatment after transfer-out (reported by outside facility; based on WHO/IUATLD definitions) | <input type="checkbox"/> Never in care at other site / did not complete transfer<br><input type="checkbox"/> Unable to obtain outcome from other site<br><input type="checkbox"/> Cured<br><input type="checkbox"/> Treatment completed<br><input type="checkbox"/> Treatment failed<br><input type="checkbox"/> Died (any cause)<br><input type="checkbox"/> Lost to follow-up<br><input type="checkbox"/> Transferred out to additional site<br><input type="checkbox"/> Not known (unknown to other site) |
| 11. Date of outcome after transfer                                                                          | _ _ _ / _ _ _ / _ _ _ _ _  (dd/mm/yyyy)                                                                                                                                                                                                                                                                                                                                                                                                                                                                      |

Investigator: \_\_\_\_\_ Signature: \_\_\_\_\_ Date |\_|\_|/|\_|\_|/|\_|\_|\_|\_|  
 ID Number \_\_\_\_\_ For peer review only - <http://bmjopen.bmj.com/site/about/guidelines.xhtml>  
 TX Outcome Page 1 of 1 v1.0 26Jul2022

[28] DEATH

|                                                                                                                             |                                                                                                                                                                                                                                                   |
|-----------------------------------------------------------------------------------------------------------------------------|---------------------------------------------------------------------------------------------------------------------------------------------------------------------------------------------------------------------------------------------------|
| <b>leDEA/TB SRN ID</b>                                                                                                      |                                                                                                                                                                                                                                                   |
| 1. Date of death ( <i>dd/mm/yyyy</i> )                                                                                      | ____/____/____                                                                                                                                                                                                                                    |
| 2. Place of death                                                                                                           | <input type="checkbox"/> Home<br><input type="checkbox"/> Hospital<br><input type="checkbox"/> Other, specify .....<br><input type="checkbox"/> Unknown                                                                                           |
| 3. Sudden death                                                                                                             | <input type="checkbox"/> Yes<br><input type="checkbox"/> No<br><input type="checkbox"/> Unknown                                                                                                                                                   |
| 4. Death unexpected                                                                                                         | <input type="checkbox"/> Yes<br><input type="checkbox"/> No<br><input type="checkbox"/> Unknown                                                                                                                                                   |
| 5. Brief narrative description of the sequence of events leading to death (please include means of diagnosis of illnesses): | .....<br>.....<br>.....<br>.....<br>.....<br>.....<br>.....<br>.....<br>.....<br>.....                                                                                                                                                            |
| <b>Cause of death (Summary of the causal relation between the conditions leading to death)</b>                              |                                                                                                                                                                                                                                                   |
| 6. Condition that directly caused death (immediate cause):                                                                  | .....                                                                                                                                                                                                                                             |
| 6a. Due to or as a consequence of                                                                                           | .....                                                                                                                                                                                                                                             |
| 6b. Due to or as a consequence of                                                                                           | .....                                                                                                                                                                                                                                             |
| 7. Condition that initiated the train of morbid events (the underlying condition)                                           | .....                                                                                                                                                                                                                                             |
| 8. Death considered to be related to TB as a contributing factor to the death                                               | <input type="checkbox"/> Related/Defined<br><input type="checkbox"/> Likely<br><input type="checkbox"/> Possible<br><input type="checkbox"/> Unlikely/Doubtful<br><input type="checkbox"/> Not related<br><input type="checkbox"/> Not applicable |
| 9. Death considered to be related to a medical treatment                                                                    | <input type="checkbox"/> Related/Defined<br><input type="checkbox"/> Likely<br><input type="checkbox"/> Possible<br><input type="checkbox"/> Unlikely/Doubtful<br><input type="checkbox"/> Not related<br><input type="checkbox"/> Not applicable |

1  
2  
3  
4  
5  
6  
7  
8  
9  
10  
11  
12  
13  
14  
15  
16  
17  
18  
19  
20  
21  
22  
23  
24  
25  
26  
27  
28  
29  
30  
31  
32  
33  
34  
35  
36  
37  
38  
39  
40  
41  
42  
43  
44  
45  
46  
47  
48  
49  
50  
51  
52  
53  
54  
55  
56  
57  
58  
59  
60

|                                                                                                            |                                                                                                                                                                                                                                                                                                                                                                                        |
|------------------------------------------------------------------------------------------------------------|----------------------------------------------------------------------------------------------------------------------------------------------------------------------------------------------------------------------------------------------------------------------------------------------------------------------------------------------------------------------------------------|
| <p>9a. If yes, suspicion of relation to</p>                                                                | <p><input type="checkbox"/> Antiretroviral treatment<br/> <input type="checkbox"/> Antituberculosis treatment<br/> <input type="checkbox"/> Other medical treatment, specify.....</p>                                                                                                                                                                                                  |
| <p>9b. Brief narrative of the suspected association including the name of the medication</p>               | <p>.....<br/>                 .....<br/>                 .....</p>                                                                                                                                                                                                                                                                                                                     |
| <p>10. Information on circumstance of death collected from<br/>                 (Check all that apply)</p> | <p><input type="checkbox"/> Family member<br/> <input type="checkbox"/> Clinician<br/> <input type="checkbox"/> Hospital medical record<br/> <input type="checkbox"/> Outpatient medical record<br/> <input type="checkbox"/> Death register<br/> <input type="checkbox"/> Autopsy report<br/> <input type="checkbox"/> Other, specify .....<br/> <input type="checkbox"/> Unknown</p> |
| <p>11. Date death reported to/known to study<br/>                 (dd/mm/yyyy)</p>                         | <p> _ _  /  _ _  /  _ _ _ _ </p>                                                                                                                                                                                                                                                                                                                                                       |
| <p>12. Notes (optional)</p>                                                                                | <p>.....<br/>                 .....<br/>                 .....<br/>                 .....<br/>                 .....</p>                                                                                                                                                                                                                                                               |

For peer review only

Investigator: \_\_\_\_\_ Signature: \_\_\_\_\_ Date |\_|\_| / |\_|\_| / |\_|\_|\_|\_|

**leDEA/TB SRN Form Event Grid**

| Form                                                                                                                 | Treatment Phase |          |                        |                         | Follow-up Phase             |                               |                                |          |
|----------------------------------------------------------------------------------------------------------------------|-----------------|----------|------------------------|-------------------------|-----------------------------|-------------------------------|--------------------------------|----------|
|                                                                                                                      | SCREENING       | BASELINE | MONTH 1<br>(Weeks 3-7) | MONTH 2<br>(Weeks 8-12) | End of TX<br>(-4 to +6 wks) | 6-M POST-TX<br>(-4 to +6 wks) | 12-M POST-TX<br>(-4 to +6 wks) | TX F/R/W |
| <b>Informed consent form<sup>a</sup></b>                                                                             | X               |          |                        |                         |                             |                               |                                |          |
| <b>Assent form (if applicable)</b>                                                                                   | X               |          |                        |                         |                             |                               |                                |          |
| <b>1. Inclusion (eligibility assessment)</b>                                                                         |                 | X        |                        |                         |                             |                               |                                |          |
| <b>2. Demographics</b>                                                                                               |                 | X        |                        |                         |                             |                               |                                |          |
| <b>3. Adolescent and young adult characteristics<sup>b</sup> (if applicable)</b>                                     |                 | X        |                        |                         |                             |                               |                                |          |
| <b>4. TB history and current diagnosis</b>                                                                           |                 | X        |                        |                         |                             |                               |                                | X        |
| <b>5. Medical history</b>                                                                                            |                 | X        |                        |                         |                             |                               |                                |          |
| <b>6. HIV history<sup>c</sup></b>                                                                                    |                 | X        |                        |                         |                             |                               |                                |          |
| <b>7. Pregnancy and post-partum history<sup>d</sup> (female participants only)</b>                                   |                 | X        |                        |                         | X                           | X                             | X                              | X        |
| <b>8. Pregnancy and Infant outcomes (multiple copies, flowsheet, if applicable)</b>                                  |                 | X        |                        |                         | X                           | X                             | X                              | X        |
| <b>9. Visit and clinical evaluation</b>                                                                              |                 | X        | X                      | X                       | X                           | X                             | X                              | X        |
| <b>10. ASSIST</b>                                                                                                    |                 | X        |                        |                         | X                           |                               | X                              | X        |
| <b>11. Additional smoking history</b>                                                                                |                 | X        |                        |                         | X                           |                               | X                              | X        |
| <b>12. SGRQ</b>                                                                                                      |                 | X        |                        |                         | X                           | X                             | X                              | X        |
| <b>13. PHQ-9</b>                                                                                                     |                 | X        |                        |                         | X                           |                               | X                              | X        |
| <b>14. Spirometry</b>                                                                                                |                 |          |                        | X                       | X                           | X                             |                                |          |
| <b>15. 1-minute sit-to-stand test<sup>e</sup></b>                                                                    |                 | X        |                        | X                       | X                           | X                             | X                              |          |
| <b>16. TB microbiology<sup>f</sup></b>                                                                               |                 | X        | X                      | X                       | X                           |                               |                                | X        |
| <b>17. Other labs<sup>f,g,h,i</sup></b>                                                                              |                 | X        | X                      | X                       | X                           | X                             | X                              | X        |
| <b>18. Chest x-ray results<sup>j</sup> (baseline and End of TX for study. Other forms are data collection only.)</b> |                 | X        | X                      | X                       | X                           | X                             | X                              | X        |
| <b>19. TB treatment (flowsheet)</b>                                                                                  |                 | X        | X                      | X                       | X                           |                               |                                | X        |
| <b>20. TB treatment adherence</b>                                                                                    |                 |          | X                      | X                       | X                           |                               |                                | X        |
| <b>21. TB directly observed therapy</b>                                                                              |                 |          | X                      | X                       | X                           |                               |                                | X        |
| <b>22. Antiretroviral treatment<sup>c</sup> (flowsheet)</b>                                                          |                 | X        | X                      | X                       | X                           | X                             | X                              | X        |
| <b>23. ART adherence<sup>c</sup></b>                                                                                 |                 | X        | X                      | X                       | X                           | X                             | X                              | X        |
| <b>24. Other research</b>                                                                                            |                 | X        |                        |                         |                             |                               |                                |          |
| <b>25. Adverse event form (repeatable)</b>                                                                           |                 |          | X                      | X                       | X                           |                               |                                | X        |
| <b>26. TB IRIS</b>                                                                                                   |                 |          | X                      | X                       |                             |                               |                                |          |
| <b>27. Treatment outcome</b>                                                                                         |                 |          |                        |                         | X                           |                               |                                | X        |
| <b>28. Death form<sup>k</sup> (if applicable, once)</b>                                                              |                 |          |                        |                         |                             |                               |                                |          |

Screening and Baseline visits may be combined. Month 1 visit is optional. Tx F/R/W: Treatment Failure, Relapse, or Withdrawal.

<sup>a</sup> Adolescent minors who turn 18 years of age during the study will be re-consented on the first visit after turning age 18.

<sup>b</sup> For all adolescent and young adult participants ages 15-24 on enrollment.

<sup>c</sup> For participants with documented HIV infection.

<sup>d</sup> For all female participants.

<sup>e</sup> Performed if site is participating in the PTLTD study aim.

<sup>f</sup> HIV viral load (if applicable), CBC, transaminases, TB testing and microbiology data to be collected if available from routine data and not as part of the study.

<sup>g</sup> HIV testing of participants not known to be positive collected from routine data and not as part of the study.

<sup>h</sup> CD4 count will only be performed on participants who are HIV-positive and who have not had a CD4 count performed in the preceding 3 months.

<sup>i</sup> HbA1C and random blood glucose collected if not available from routine data as part of the study.

<sup>j</sup> Digitized/digitizable CXR at baseline, unless done within 4 weeks prior to the Baseline Visit as part of standard of care. If a CXR is not available at the End of Treatment, it will be obtained as part of the study. CXRs from Month 2 and TX F/R/W Visits will be collected if obtained as part of standard of care. Pregnant women are not required to have a CXR.

<sup>k</sup> To be completed for any participants who die after study enrollment, from any cause.
