# Supplementary material for: The Tuberculosis Sentinel Research Network (TB-SRN) of the International epidemiology Databases to Evaluate AIDS (IeDEA): protocol for a prospective cohort study in Africa, Southeast Asia and Latin America
Source: PubMed Central journal article supplement — BMJ Open. 2024 Jan 9;14(1):e079138. doi: 10.1136/bmjopen-2023-079138 (PMC10806577; doi:10.1136/bmjopen-2023-079138), 2024-01-09
Supplement: bmjopen-2023-079138supp001.pdf [file bmjopen-2023-079138supp001.pdf]

### **leDEA TB-SRN Case Report Forms (CRFs)**

Following are the paper case report forms (CRFs) for the leDEA TB-SRN Study. Some sites alternately use a digital version of the CRFs available in REDCap which include questions identical to the paper CRFs. A full REDCap version is available upon request. For questions regarding the CRFs or to request a REDCap file, please contact [laquita.mcdade@vumc.org](mailto:laquita.mcdade@vumc.org)

## leDEA/TB SRN

| [1] INCLUSION                                                                                                                                                                                                                                                                                    |                                                                                               |                          |                          |
|--------------------------------------------------------------------------------------------------------------------------------------------------------------------------------------------------------------------------------------------------------------------------------------------------|-----------------------------------------------------------------------------------------------|--------------------------|--------------------------|
| leDEA/TB SRN ID                                                                                                                                                                                                                                                                                  |                                                                                               |                          |                          |
| Type of visit                                                                                                                                                                                                                                                                                    | <input type="checkbox"/> Baseline                                                             |                          |                          |
| Visit date (dd/mm/yyyy)                                                                                                                                                                                                                                                                          | _ _ / _ _ / _ _ _ _                                                                           |                          |                          |
| Inclusion criteria (include if <u>all</u> items 1-3 are present)                                                                                                                                                                                                                                 | Yes                                                                                           | No                       | Specify                  |
| <b>1. Age ≥15 years</b>                                                                                                                                                                                                                                                                          | <input type="checkbox"/>                                                                      | <input type="checkbox"/> |                          |
| <b>2. Diagnostic criteria – At least <u>one</u> of the diagnostic criteria 2a-2c is met</b>                                                                                                                                                                                                      | <input type="checkbox"/>                                                                      | <input type="checkbox"/> |                          |
| 2a. Clinically diagnosed pulmonary TB and plan to initiate TB treatment with:<br>- Any signs or symptoms <u>and</u> CXR findings consistent with pulmonary TB, <u>OR</u><br>- Respiratory signs and symptoms                                                                                     |                                                                                               |                          | <input type="checkbox"/> |
| 2b. Microbiologically confirmed pulmonary TB based on sputum or other respiratory samples<br>- Smear positive, <u>OR</u><br>- Positive rapid molecular TB tests (Xpert MTB/RIF Ultra), <u>OR</u><br>- Positive TB culture                                                                        |                                                                                               |                          | <input type="checkbox"/> |
| 2c. Positive lipoarabinomannan (LAM) urine test <u>and</u> clinical diagnosis of pulmonary TB as defined above                                                                                                                                                                                   |                                                                                               |                          | <input type="checkbox"/> |
| <b>3. HIV test documented or willingness to be tested:</b><br>- Documented HIV infection, <u>OR</u><br>- Any HIV test less than or equal to 90 days earlier, <u>OR</u><br>- Willingness to be tested for HIV (if no recent test available – <i>test to be done within 7 days for inclusion</i> ) | <input type="checkbox"/>                                                                      | <input type="checkbox"/> |                          |
| Exclusion criteria (exclude if <u>≥1</u> of items 4-7 present)                                                                                                                                                                                                                                   | Yes                                                                                           | No                       | Specify                  |
| 4. Has received TB treatment for more than 7 days within the prior 30 days, excluding TB preventive therapy                                                                                                                                                                                      | <input type="checkbox"/>                                                                      | <input type="checkbox"/> |                          |
| 5. Plans to move to a distant site that would interfere with ability to complete all study visits                                                                                                                                                                                                | <input type="checkbox"/>                                                                      | <input type="checkbox"/> |                          |
| 6. Substantial cognitive impairment that may interfere with the ability to give reliable informed consent                                                                                                                                                                                        | <input type="checkbox"/>                                                                      | <input type="checkbox"/> |                          |
| 7. Currently imprisoned                                                                                                                                                                                                                                                                          | <input type="checkbox"/>                                                                      | <input type="checkbox"/> |                          |
| Consent and enrolment                                                                                                                                                                                                                                                                            |                                                                                               |                          |                          |
| 8. <u>Signed and dated</u> informed consent or witnessed oral consent                                                                                                                                                                                                                            | <input type="checkbox"/>                                                                      | <input type="checkbox"/> |                          |
| 8a. <i>For minors (under age 18):</i> <u>Signed and dated</u> informed consent of a primary caregiver (and informed adolescent assent where required)                                                                                                                                            | <input type="checkbox"/>                                                                      | <input type="checkbox"/> |                          |
| 9. Date of enrolment (dd/mm/yyyy)                                                                                                                                                                                                                                                                | _ _ / _ _ / _ _ _ _                                                                           |                          |                          |
| Additional questions                                                                                                                                                                                                                                                                             |                                                                                               |                          |                          |
| 10. Type of setting where enrolled                                                                                                                                                                                                                                                               | <input type="checkbox"/> Inpatient setting<br><input type="checkbox"/> Outpatient setting     |                          |                          |
| 11. Currently co-enrolled in other research study?                                                                                                                                                                                                                                               | <input type="checkbox"/> Yes (fill <b>Other Research</b> form)<br><input type="checkbox"/> No |                          |                          |

Investigator: \_\_\_\_\_ Signature: \_\_\_\_\_ Date |\_|\_|/|\_|\_|/|\_|\_|\_|\_|

ID Number \_\_\_\_\_  
v1.0 26Jul2022

Inclusion Page 1 of 1

## leDEA/TB SRN

| [2] DEMOGRAPHICS                                                                |                                                                                                                                                                                                                                                                                                                                                                                                                                                                                                                                                                   |
|---------------------------------------------------------------------------------|-------------------------------------------------------------------------------------------------------------------------------------------------------------------------------------------------------------------------------------------------------------------------------------------------------------------------------------------------------------------------------------------------------------------------------------------------------------------------------------------------------------------------------------------------------------------|
| <b>leDEA/TB SRN ID</b>                                                          |                                                                                                                                                                                                                                                                                                                                                                                                                                                                                                                                                                   |
| Type of visit                                                                   | <input type="checkbox"/> Baseline                                                                                                                                                                                                                                                                                                                                                                                                                                                                                                                                 |
| Visit date (dd/mm/yyyy)                                                         | _ _ _  /  _ _ _  /  _ _ _ _ _                                                                                                                                                                                                                                                                                                                                                                                                                                                                                                                                     |
| 1. Sex at birth                                                                 | <input type="checkbox"/> Male<br><input type="checkbox"/> Female<br><input type="checkbox"/> Other<br><input type="checkbox"/> Unknown                                                                                                                                                                                                                                                                                                                                                                                                                            |
| 2. Date of birth (dd/mm/yyyy)<br>(estimate if unknown)                          | _ _ _  /  _ _ _  /  _ _ _ _ _                                                                                                                                                                                                                                                                                                                                                                                                                                                                                                                                     |
| 3. Current Marital status<br>(Check one option that best applies)               | <input type="checkbox"/> Single<br><input type="checkbox"/> Married<br><input type="checkbox"/> Widowed<br><input type="checkbox"/> Separated<br><input type="checkbox"/> Divorced<br><input type="checkbox"/> Living with partner                                                                                                                                                                                                                                                                                                                                |
| 4. Highest level of education completed<br>(Check one option that best applies) | <input type="checkbox"/> None<br><input type="checkbox"/> Primary education<br><input type="checkbox"/> Lower secondary or end of basic education<br><input type="checkbox"/> Upper secondary<br><input type="checkbox"/> Post-secondary non-tertiary (e.g., post-secondary certificate or diploma)<br><input type="checkbox"/> University<br><input type="checkbox"/> Post-graduate<br><input type="checkbox"/> Koranic school<br><input type="checkbox"/> Other, only if none of the previous options applies<br><input type="checkbox"/> Do not know / unknown |
| 5. Current Profession (occupation)<br>(Check all that apply)                    | <input type="checkbox"/> Cook<br><input type="checkbox"/> Craftsman<br><input type="checkbox"/> Employee, private sector<br><input type="checkbox"/> Employee, public sector<br><input type="checkbox"/> Farmer, pastoralist<br><input type="checkbox"/> Homemaker (e.g., housewife, househusband)<br><input type="checkbox"/> Housekeeper                                                                                                                                                                                                                        |

ID Number \_\_\_\_\_  
v1.0 26Jul2022

Demographics Page 1 of 3

|                                                                                                                                        |                                                                                                                                                                                                                                                                                                                                                                                                                                                   |
|----------------------------------------------------------------------------------------------------------------------------------------|---------------------------------------------------------------------------------------------------------------------------------------------------------------------------------------------------------------------------------------------------------------------------------------------------------------------------------------------------------------------------------------------------------------------------------------------------|
|                                                                                                                                        | <input type="checkbox"/> Policeman, serviceman/military, customs officer<br><input type="checkbox"/> Storekeeper<br><input type="checkbox"/> Street / market seller<br><input type="checkbox"/> Student<br><input type="checkbox"/> Truck driver, taxi driver<br><input type="checkbox"/> Retired<br><input type="checkbox"/> Unemployed<br><input type="checkbox"/> Other<br><input type="checkbox"/> Do not know / unknown                      |
| 6. Currently working or living in a health care setting, institutional setting, or other high TB-risk setting                          | <input type="checkbox"/> No / not applicable<br><input type="checkbox"/> Yes                                                                                                                                                                                                                                                                                                                                                                      |
| 7. If yes, specify.<br>(Check all that apply)                                                                                          | <input type="checkbox"/> Hospital or clinic<br><input type="checkbox"/> Nursing home or long-term care facility<br><input type="checkbox"/> Orphanage, shelter, or another residential center<br><input type="checkbox"/> Dormitory (school)<br><input type="checkbox"/> Military<br><input type="checkbox"/> Prison<br><input type="checkbox"/> Refugee camp<br><input type="checkbox"/> Other<br><input type="checkbox"/> Do not know / unknown |
| 8. Number of people residing in the household<br>(including full-time and part-time residents)                                         | _ _ _                                                                                                                                                                                                                                                                                                                                                                                                                                             |
| 9. Number of children <5 years residing in the household (full-time or part-time)                                                      | _ _ _                                                                                                                                                                                                                                                                                                                                                                                                                                             |
| 10. Total household monthly income<br>(Including all sources of household / family monthly income; check one option that best applies) | <input type="checkbox"/> < 40 USD or local currency equivalent<br><input type="checkbox"/> ≥ 40 AND < 80 USD<br><input type="checkbox"/> ≥ 80 AND < 200 USD<br><input type="checkbox"/> ≥ 200 AND <400 USD<br><input type="checkbox"/> ≥ 400 USD<br><input type="checkbox"/> Do not know                                                                                                                                                          |

|                                                                                          |                                                                                                                                                                                                                                                                                                                                                                                                                           |
|------------------------------------------------------------------------------------------|---------------------------------------------------------------------------------------------------------------------------------------------------------------------------------------------------------------------------------------------------------------------------------------------------------------------------------------------------------------------------------------------------------------------------|
| 11. Current dwelling location                                                            | <input type="checkbox"/> City/urban area (specify type below)<br><input type="checkbox"/> Peri-urban area<br><input type="checkbox"/> Rural area                                                                                                                                                                                                                                                                          |
| 12. City/urban area type                                                                 | <input type="checkbox"/> Formal housing<br><input type="checkbox"/> Slum/shantytown/favela                                                                                                                                                                                                                                                                                                                                |
| 13. Type of dwelling<br>(Check one option that best applies or applies most of the time) | <input type="checkbox"/> Free-standing house<br><input type="checkbox"/> Apartment, condominium, or other residential building<br><input type="checkbox"/> Boarding school or college<br><input type="checkbox"/> Institution<br><input type="checkbox"/> Homeless / street living<br><input type="checkbox"/> Other                                                                                                      |
| 14. Distance from residence to clinic (km)                                               | _ _ _ _  km                                                                                                                                                                                                                                                                                                                                                                                                               |
| 15. Transportation mode to TB clinic (Check all that apply)                              | <input type="checkbox"/> Foot<br><input type="checkbox"/> Bicycle<br><input type="checkbox"/> Motorcycle<br><input type="checkbox"/> Personal automobile (car, truck)<br><input type="checkbox"/> Public transportation (bus, train, etc.)<br><input type="checkbox"/> Taxi or rideshare service (including hired car, mini-van, motorbike)<br><input type="checkbox"/> Medical vehicle<br><input type="checkbox"/> Other |
| 16. Typical transportation cost to and from TB clinic (both ways, local currency)        | _____ (local currency)                                                                                                                                                                                                                                                                                                                                                                                                    |

Investigator: \_\_\_\_\_ Signature: \_\_\_\_\_ Date |\_|\_|/|\_|\_|/|\_|\_|\_|\_|

ID Number \_\_\_\_\_  
v1.0 26Jul2022

Demographics Page 3 of 3

## leDEA/TB SRN

| [3] Adolescent and Young Adult Characteristics for All Participants under Age 25                              |                                                                                                                                                                                                                                                                                                                                                                                                                                                                                                                                    |
|---------------------------------------------------------------------------------------------------------------|------------------------------------------------------------------------------------------------------------------------------------------------------------------------------------------------------------------------------------------------------------------------------------------------------------------------------------------------------------------------------------------------------------------------------------------------------------------------------------------------------------------------------------|
| leDEA/TB SRN ID                                                                                               |                                                                                                                                                                                                                                                                                                                                                                                                                                                                                                                                    |
| Visit                                                                                                         | <input type="checkbox"/> Baseline                                                                                                                                                                                                                                                                                                                                                                                                                                                                                                  |
| Visit date (dd/mm/yyyy)                                                                                       | _ _ _ / _ _ _ / _ _ _ _ _                                                                                                                                                                                                                                                                                                                                                                                                                                                                                                          |
| Adolescent and Young Adult questions                                                                          |                                                                                                                                                                                                                                                                                                                                                                                                                                                                                                                                    |
| 1. Biological mother alive?                                                                                   | <input type="checkbox"/> Yes<br><input type="checkbox"/> No<br><input type="checkbox"/> Unknown<br><input type="checkbox"/> Refused                                                                                                                                                                                                                                                                                                                                                                                                |
| 2. Biological father alive?                                                                                   | <input type="checkbox"/> Yes<br><input type="checkbox"/> No<br><input type="checkbox"/> Unknown<br><input type="checkbox"/> Refused                                                                                                                                                                                                                                                                                                                                                                                                |
| 3. Currently in a relationship with someone? (May be a spouse, a partner, a girlfriend, a boyfriend, ...).    | <input type="checkbox"/> Yes<br><input type="checkbox"/> No<br><input type="checkbox"/> Unknown<br><input type="checkbox"/> Refused                                                                                                                                                                                                                                                                                                                                                                                                |
| 4. Has the participant had any biological children? (Biological children may or may not be living.)           | <input type="checkbox"/> Yes<br><input type="checkbox"/> No<br><input type="checkbox"/> Unknown<br><input type="checkbox"/> Refused                                                                                                                                                                                                                                                                                                                                                                                                |
| 5. With whom does the participant live?<br><br>(If multiple places on a regular basis, check all that apply.) | <input type="checkbox"/> Immediate family members<br><input type="checkbox"/> Extended family members (family members other than biological parents and siblings)<br><input type="checkbox"/> With a peer or partner<br><input type="checkbox"/> With school<br><input type="checkbox"/> In children's home or institution<br><input type="checkbox"/> Living independently (includes those living on the street)<br><input type="checkbox"/> Other: _____<br><input type="checkbox"/> Unknown<br><input type="checkbox"/> Refused |
| 6. Main caregiver<br><br>(Check the option that best applies.)                                                | <input type="checkbox"/> Self (SKIP to #9)<br><input type="checkbox"/> Mother<br><input type="checkbox"/> Father<br><input type="checkbox"/> Aunt/Uncle<br><input type="checkbox"/> Grandparent<br><input type="checkbox"/> Sibling<br><input type="checkbox"/> Spouse/partner<br><input type="checkbox"/> Other relative<br><input type="checkbox"/> Guardian, non-relative<br><input type="checkbox"/> Unknown<br><input type="checkbox"/> Refused                                                                               |
| 7. Do the participant and the main caregiver currently live in the same place?                                | <input type="checkbox"/> Yes<br><input type="checkbox"/> No, adolescent at boarding school or college<br><input type="checkbox"/> No, adolescent living on the street<br><input type="checkbox"/> No, other circumstance<br><input type="checkbox"/> Unknown                                                                                                                                                                                                                                                                       |

|                                                                                                                                                                                                                        |                                                                                                                                                                                                                                                                                                                                                                                                                                                                                                                                                                                           |
|------------------------------------------------------------------------------------------------------------------------------------------------------------------------------------------------------------------------|-------------------------------------------------------------------------------------------------------------------------------------------------------------------------------------------------------------------------------------------------------------------------------------------------------------------------------------------------------------------------------------------------------------------------------------------------------------------------------------------------------------------------------------------------------------------------------------------|
| (Are both spending most nights at the same residence in a given week?)                                                                                                                                                 | <input type="checkbox"/> Refused                                                                                                                                                                                                                                                                                                                                                                                                                                                                                                                                                          |
| 8. Role(s), if any, of main caregiver in participant medical care<br><br>(Examples might include bringing participant to clinic visits or to the hospital when sick or picking up medications. Choose all that apply.) | <input type="checkbox"/> None / not involved in medical care<br><input type="checkbox"/> Bringing the adolescent to clinic visits<br><input type="checkbox"/> Bringing the adolescent to the hospital when sick<br><input type="checkbox"/> Supervising the adolescent taking medications<br><input type="checkbox"/> Picking up prescribed medications for the adolescent<br><input type="checkbox"/> Providing transportation fare for the adolescent to attend clinic<br><input type="checkbox"/> Other: _____<br><input type="checkbox"/> Unknown<br><input type="checkbox"/> Refused |
| 9. Is participant currently attending school (including college or other higher learning)?                                                                                                                             | <input type="checkbox"/> Yes (SKIP to #12)<br><input type="checkbox"/> No<br><input type="checkbox"/> Unknown<br><input type="checkbox"/> Refused                                                                                                                                                                                                                                                                                                                                                                                                                                         |
| 10. Main reason for not attending school (or college or other higher learning)                                                                                                                                         | <input type="checkbox"/> Sick<br><input type="checkbox"/> Doesn't like school<br><input type="checkbox"/> Has to look after family members<br><input type="checkbox"/> Not enough money<br><input type="checkbox"/> School too far away<br><input type="checkbox"/> Have to work<br><input type="checkbox"/> Have completed school<br><input type="checkbox"/> Other: _____<br><input type="checkbox"/> Unknown<br><input type="checkbox"/> Refused                                                                                                                                       |
| 11. If attending school (or college or other higher learning), does the participant reside at school? (e.g., in boarding school, dormitory, or residential housing?)                                                   | <input type="checkbox"/> Yes<br><input type="checkbox"/> No<br><input type="checkbox"/> Unknown<br><input type="checkbox"/> Refused                                                                                                                                                                                                                                                                                                                                                                                                                                                       |
| 12. Main source of income                                                                                                                                                                                              | <input type="checkbox"/> Self (money earned as employee, self-employment, interest/dividends, loans or bursaries or welfare payments/grants)<br><input type="checkbox"/> Dependent on someone else's income (parents, caregiver, partner, other relatives)<br><input type="checkbox"/> Unknown<br><input type="checkbox"/> Refused                                                                                                                                                                                                                                                        |
| <b>Disclosure Screening questions: Only for <u>adolescents and young adults with HIV</u>, to assess adolescent's awareness of their status.</b>                                                                        |                                                                                                                                                                                                                                                                                                                                                                                                                                                                                                                                                                                           |
| 13. Why do you come for visits at this clinic (or at another site)?                                                                                                                                                    | <b>DO NOT READ OPTIONS, THIS IS AN OPEN-ENDED QUESTION</b><br><input type="checkbox"/> HIV<br><input type="checkbox"/> Other: _____<br><input type="checkbox"/> Unknown                                                                                                                                                                                                                                                                                                                                                                                                                   |
| 14. Do you have any health conditions (other than tuberculosis or TB)?                                                                                                                                                 | <b>DO NOT READ OPTIONS, THIS IS AN OPEN-ENDED QUESTION</b><br><input type="checkbox"/> HIV<br><input type="checkbox"/> Other: _____<br><input type="checkbox"/> Unknown                                                                                                                                                                                                                                                                                                                                                                                                                   |

Investigator: \_\_\_\_\_ Signature: \_\_\_\_\_ Date |\_|\_|/|\_|\_|/|\_|\_|\_|\_|

ID Number \_\_\_\_\_  
v1.0 26Jul2022

Adolescent/YA Characteristics Page 2 of 3

|                                                                                                                                                                                                                      |                                                                                                                                                                         |
|----------------------------------------------------------------------------------------------------------------------------------------------------------------------------------------------------------------------|-------------------------------------------------------------------------------------------------------------------------------------------------------------------------|
| 15. For what conditions do you take medications (other than for tuberculosis or TB)?                                                                                                                                 | <b>DO NOT READ OPTIONS, THIS IS AN OPEN-ENDED QUESTION</b><br><input type="checkbox"/> HIV<br><input type="checkbox"/> Other: _____<br><input type="checkbox"/> Unknown |
| 16. Do you have questions about why you need to take medications?                                                                                                                                                    | <input type="checkbox"/> Yes<br><input type="checkbox"/> No<br><input type="checkbox"/> Unknown                                                                         |
| 17. If yes, what questions do you have? (Refer to clinical care providers.)                                                                                                                                          | _____<br>_____<br>_____                                                                                                                                                 |
| <b><i>If the answers to all of questions 13-15 were "Unknown" or "Other," may need to consider the adolescent <u>NOT DISCLOSED</u>. Please refer to procedures for avoiding accidental disclosure of status.</i></b> |                                                                                                                                                                         |

Investigator: \_\_\_\_\_ Signature: \_\_\_\_\_ Date |\_|\_|/|\_|\_|/|\_|\_|\_|\_|

ID Number \_\_\_\_\_  
v1.0 26Jul2022

Adolescent/YA Characteristics Page 3 of 3



## IeDEA TB SRN

| [4] TB History and Current TB Diagnosis                                                                                                |                                                                                                                                                                                                                                                                                                                                                                                                                                                              |
|----------------------------------------------------------------------------------------------------------------------------------------|--------------------------------------------------------------------------------------------------------------------------------------------------------------------------------------------------------------------------------------------------------------------------------------------------------------------------------------------------------------------------------------------------------------------------------------------------------------|
| IeDEA/TB SRN ID                                                                                                                        |                                                                                                                                                                                                                                                                                                                                                                                                                                                              |
| Type of visit                                                                                                                          | <input type="checkbox"/> Baseline<br><input type="checkbox"/> Tx F/R/W (for TB recurrence only)                                                                                                                                                                                                                                                                                                                                                              |
| Visit date (dd/mm/yyyy)                                                                                                                | _ _ / _ _ / _ _ _ _                                                                                                                                                                                                                                                                                                                                                                                                                                          |
| <i>For the items below, choose the best single option unless otherwise indicated.</i>                                                  |                                                                                                                                                                                                                                                                                                                                                                                                                                                              |
| <b>Previous TB history (fill only at baseline visit)</b>                                                                               |                                                                                                                                                                                                                                                                                                                                                                                                                                                              |
| 1. Previous TB preventive therapy (TPT) received                                                                                       | <input type="checkbox"/> Yes<br><input type="checkbox"/> No<br><input type="checkbox"/> Unknown                                                                                                                                                                                                                                                                                                                                                              |
| 2. TPT regimen previously prescribed +++<br>(Most recent TPT course, if multiple previous TPT regimens)                                | <input type="checkbox"/> 6 to 9 months daily isoniazid (6H or 9H)<br><input type="checkbox"/> 4 months daily rifampicin (4R)<br><input type="checkbox"/> 3 months weekly rifapentine plus isoniazid (3HP)<br><input type="checkbox"/> 3 months daily isoniazid plus rifampicin (3HR)<br><input type="checkbox"/> 1 month daily rifapentine plus isoniazid (1HP)<br><input type="checkbox"/> Other, please specify: _____<br><input type="checkbox"/> Unknown |
| 3. TPT completion<br>(Most recent TPT course)                                                                                          | <input type="checkbox"/> Yes<br><input type="checkbox"/> No<br><input type="checkbox"/> Unknown                                                                                                                                                                                                                                                                                                                                                              |
| 4. Date of TPT completion/interruption<br>(dd/mm/yyyy; most recent TPT course)                                                         | _ _ / _ _ / _ _ _ _                                                                                                                                                                                                                                                                                                                                                                                                                                          |
| 5. Previous TB disease treated                                                                                                         | <input type="checkbox"/> Yes<br><input type="checkbox"/> No (if no go to section "current TB episode")                                                                                                                                                                                                                                                                                                                                                       |
| 6. Type of TB during previous TB episode (Check one; most recent TB episode, if multiple previous TB episodes)                         | <input type="checkbox"/> Pulmonary<br><input type="checkbox"/> Extrapulmonary (specify below)<br><input type="checkbox"/> Pulmonary and extrapulmonary (specify below)<br><input type="checkbox"/> Unknown                                                                                                                                                                                                                                                   |
| 7. Resistance pattern for previous TB episode<br>(Most recent TB episode, if multiple previous TB episodes)                            | <input type="checkbox"/> Drug-susceptible (DS-TB)<br><input type="checkbox"/> Drug-resistant (DR-TB) – if resistance to one or more agents<br><input type="checkbox"/> Unknown                                                                                                                                                                                                                                                                               |
| 8. Extrapulmonary location for previous TB episode<br>(Check all that apply; most recent TB episode, if multiple previous TB episodes) | <input type="checkbox"/> Lymph node<br><input type="checkbox"/> Pleural<br><input type="checkbox"/> Bone / joint<br><input type="checkbox"/> Genitourinary<br><input type="checkbox"/> Gastrointestinal<br><input type="checkbox"/> Miliary<br><input type="checkbox"/> Meningeal / CNS                                                                                                                                                                      |

ID Number \_\_\_\_\_  
v1.0 26Jul2022

TB HX & Current TB Form Page 1 of 4

## IeDEA TB SRN

|                                                                                                    |                                                                                                                                                                                                                                                                                                                                                                                                                                                                                                                                 |
|----------------------------------------------------------------------------------------------------|---------------------------------------------------------------------------------------------------------------------------------------------------------------------------------------------------------------------------------------------------------------------------------------------------------------------------------------------------------------------------------------------------------------------------------------------------------------------------------------------------------------------------------|
|                                                                                                    | <input type="checkbox"/> Other, please specify: _____<br><input type="checkbox"/> Unknown                                                                                                                                                                                                                                                                                                                                                                                                                                       |
| 9. End of previous TB treatment date (dd/mm/yyyy; if multiple, most recent TB episode)             | _ _ / _ _ / _ _ _ _                                                                                                                                                                                                                                                                                                                                                                                                                                                                                                             |
| 10. TB treatment outcome (Most recent previous TB episode; WHO/IUATLD outcomes)                    | <input type="checkbox"/> Cured<br><input type="checkbox"/> Treatment completed<br><input type="checkbox"/> Treatment failed<br><input type="checkbox"/> Lost to follow-up<br><input type="checkbox"/> Transferred out<br><input type="checkbox"/> Not evaluated<br><input type="checkbox"/> Unknown                                                                                                                                                                                                                             |
| 11. Source of TB history (Check all that apply)                                                    | <input type="checkbox"/> TB register<br><input type="checkbox"/> Medical record<br><input type="checkbox"/> Participant report                                                                                                                                                                                                                                                                                                                                                                                                  |
| <b>Current TB episode (baseline + recurrence)</b>                                                  |                                                                                                                                                                                                                                                                                                                                                                                                                                                                                                                                 |
| 12. History of known contact with TB                                                               | <input type="checkbox"/> Yes<br><input type="checkbox"/> No (SKIP to #15)<br><input type="checkbox"/> Unknown                                                                                                                                                                                                                                                                                                                                                                                                                   |
| 13. Time since most recent contact with TB                                                         | <input type="checkbox"/> < 1 year<br><input type="checkbox"/> ≥ 1 year & <2 years<br><input type="checkbox"/> ≥ 2 years<br><input type="checkbox"/> Unknown                                                                                                                                                                                                                                                                                                                                                                     |
| 14. Place of contact (Check one)                                                                   | <input type="checkbox"/> Household<br><input type="checkbox"/> Occupational<br><input type="checkbox"/> School or college<br><input type="checkbox"/> Other institutional setting (not school, work, or housing/residential contact)<br><input type="checkbox"/> Other<br><input type="checkbox"/> Unknown                                                                                                                                                                                                                      |
| 15. Approximate date of start of symptoms (dd/mm/yyyy)                                             | _ _ / _ _ / _ _ _ _ <br><input type="checkbox"/> Unknown                                                                                                                                                                                                                                                                                                                                                                                                                                                                        |
| 16. Locations of care-seeking for this TB episode (Exclude current facility; check all that apply) | <input type="checkbox"/> Primary health care clinic (primary-level)<br><input type="checkbox"/> Public district/provincial hospital (secondary-level)<br><input type="checkbox"/> Public teaching/referral hospital (tertiary-level)<br><input type="checkbox"/> Private practice<br><input type="checkbox"/> Private hospital<br><input type="checkbox"/> Pharmacy / dispensary<br><input type="checkbox"/> Self-management / self-medication<br><input type="checkbox"/> Traditional healer<br><input type="checkbox"/> Other |

## IeDEA TB SRN

|                                                                                                              |                                                                                                                                                                                                                                                                                                                                                                                      |
|--------------------------------------------------------------------------------------------------------------|--------------------------------------------------------------------------------------------------------------------------------------------------------------------------------------------------------------------------------------------------------------------------------------------------------------------------------------------------------------------------------------|
|                                                                                                              | <input type="checkbox"/> Unknown                                                                                                                                                                                                                                                                                                                                                     |
| 17. Date of first consultation at any facility (clinic or hospital) for the current TB episode (dd/mm/yyyy)  | <input type="text"/> / <input type="text"/> / <input type="text"/> <input type="text"/> <input type="text"/> <input type="text"/><br><input type="checkbox"/> Unknown                                                                                                                                                                                                                |
| 18. Number of visits to any health facility (clinic or hospital) during illness course prior to TB diagnosis | <input type="text"/> <input type="text"/><br><input type="checkbox"/> Unknown                                                                                                                                                                                                                                                                                                        |
| 19. Inpatient hospital admission during current TB illness                                                   | <input type="checkbox"/> Yes<br><input type="checkbox"/> No (SKIP to #21)<br><input type="checkbox"/> Unknown                                                                                                                                                                                                                                                                        |
| 20. If yes, duration of hospitalization (days)                                                               | <input type="text"/> <input type="text"/> days<br><input type="checkbox"/> Ongoing (return to form to complete duration after discharge)<br><input type="checkbox"/> Unknown                                                                                                                                                                                                         |
| 21. Date of TB diagnosis (dd/mm/yyyy)                                                                        | <input type="text"/> / <input type="text"/> / <input type="text"/> <input type="text"/> <input type="text"/> <input type="text"/>                                                                                                                                                                                                                                                    |
| 22. Patient TB category (WHO/IUATLD)                                                                         | <input type="checkbox"/> New case<br><input type="checkbox"/> Relapse<br><input type="checkbox"/> Treatment after failure<br><input type="checkbox"/> Treatment after loss to follow-up<br><input type="checkbox"/> Transfer in<br><input type="checkbox"/> Other<br><input type="checkbox"/> Unknown                                                                                |
| 23. TB diagnosis (type of TB)                                                                                | <input type="checkbox"/> Pulmonary<br><input type="checkbox"/> Pulmonary and extrapulmonary (specify)<br><input type="checkbox"/> Unknown                                                                                                                                                                                                                                            |
| 24. Extrapulmonary location (Check all that apply)                                                           | <input type="checkbox"/> Lymph node<br><input type="checkbox"/> Pleural<br><input type="checkbox"/> Bone / joint<br><input type="checkbox"/> Genitourinary<br><input type="checkbox"/> Gastrointestinal<br><input type="checkbox"/> Miliary<br><input type="checkbox"/> Meningeal / CNS<br><input type="checkbox"/> Other, please specify: _____<br><input type="checkbox"/> Unknown |
| 25. TB-SRN pulmonary TB diagnostic criteria (Check all that apply)                                           | <input type="checkbox"/> Respiratory symptoms<br><input type="checkbox"/> CXR feature suggestive of PTB<br><input type="checkbox"/> Positive MTB tests on respiratory samples                                                                                                                                                                                                        |
| 26. Microbiological status (Fill detailed test results in TB Lab form)                                       | <input type="checkbox"/> No samples collected<br><input type="checkbox"/> Negative MTB testing only (e.g., smear, Xpert, culture, or LAM; specify results in TB Lab form)                                                                                                                                                                                                            |

## leDEA TB SRN

|                                                                                                  |                                                                                                                                                                                                         |
|--------------------------------------------------------------------------------------------------|---------------------------------------------------------------------------------------------------------------------------------------------------------------------------------------------------------|
|                                                                                                  | <input type="checkbox"/> Any Positive MTB test result(s) (e.g., smear, Xpert, culture, or LAM; specify results in <b>TB Lab</b> form)<br><input type="checkbox"/> Pending                               |
| 27. Resistance pattern at diagnosis ( <i>Fill detailed tests results in <b>TB Lab</b> form</i> ) | <input type="checkbox"/> Drug-susceptible (DS-TB)<br><input type="checkbox"/> Drug-resistant (DR-TB) – <i>if presumed or known resistance to one or more agents</i><br><input type="checkbox"/> Unknown |
| 28. TB treatment initiation                                                                      | <input type="checkbox"/> Yes (already initiated)<br><input type="checkbox"/> Planned (within 7 days)                                                                                                    |
| 29. Date of TB treatment initiation (dd/mm/yyyy)                                                 | _ _ / _ _ / _ _ _ _                                                                                                                                                                                     |
| 30. Type of TB treatment initiated ( <i>Enter regimen details in <b>TB treatment</b> form</i> )  | <input type="checkbox"/> 1st line regimen (DS-TB)<br><input type="checkbox"/> 2nd line regimen (DR-TB)<br><input type="checkbox"/> Other, specify: _____                                                |

**leDEA TB SRN**

Investigator: \_\_\_\_\_ Signature: \_\_\_\_\_ Date |\_|\_|/|\_|\_|/|\_|\_|\_|\_|

## IeDEA TB SRN

| [5] MEDICAL HISTORY FORM                                                                                      |                                                                                                                                                                                  |
|---------------------------------------------------------------------------------------------------------------|----------------------------------------------------------------------------------------------------------------------------------------------------------------------------------|
| IeDEA/TB SRN ID                                                                                               |                                                                                                                                                                                  |
| Visit                                                                                                         | <input type="checkbox"/> Baseline                                                                                                                                                |
| Visit date (dd/mm/yyyy)                                                                                       | _ _ / _ _ / _ _ _ _                                                                                                                                                              |
| <i>For each of the conditions below, indicate if there is any history of each condition (current or past)</i> |                                                                                                                                                                                  |
| 1. Asthma                                                                                                     | <input type="checkbox"/> Yes<br><input type="checkbox"/> No<br><input type="checkbox"/> Unknown                                                                                  |
| 2. Chronic obstructive pulmonary disease (COPD) or emphysema                                                  | <input type="checkbox"/> Yes<br><input type="checkbox"/> No<br><input type="checkbox"/> Unknown                                                                                  |
| 3. Pulmonary fibrosis or interstitial lung disease                                                            | <input type="checkbox"/> Yes<br><input type="checkbox"/> No<br><input type="checkbox"/> Unknown                                                                                  |
| 4. History of COVID-19                                                                                        | <input type="checkbox"/> Yes (complete COVID-19 test data in <b>Other Lab</b> form)<br><input type="checkbox"/> No (SKIP to #5)<br><input type="checkbox"/> Unknown (SKIP to #5) |
| 4a. Number of COVID-19 diagnosed episodes?                                                                    | _ _  episodes                                                                                                                                                                    |
| 4b. Date of most recent COVID-19 diagnosis (dd/mm/yyyy)                                                       | _ _ / _ _ / _ _ _ _ <br><input type="checkbox"/> Unknown                                                                                                                         |
| 5. Other lung disease                                                                                         | <input type="checkbox"/> Yes<br><input type="checkbox"/> No (SKIP to #6)<br><input type="checkbox"/> Unknown (SKIP to #6)                                                        |
| 5a. If yes, specify lung disease                                                                              | _____                                                                                                                                                                            |
| 6. Hypertension                                                                                               | <input type="checkbox"/> Yes<br><input type="checkbox"/> No (SKIP to #7)<br><input type="checkbox"/> Unknown (SKIP to #7)                                                        |

## IeDEA TB SRN

|                                                   |                                                                                                                                                                                                                                                                                                                                                                                                          |
|---------------------------------------------------|----------------------------------------------------------------------------------------------------------------------------------------------------------------------------------------------------------------------------------------------------------------------------------------------------------------------------------------------------------------------------------------------------------|
| 6a. Current treatment for hypertension            | <input type="checkbox"/> Yes<br><input type="checkbox"/> No<br><input type="checkbox"/> Unknown                                                                                                                                                                                                                                                                                                          |
| 6b. If yes, specify anti-hypertensive medications | <input type="checkbox"/> ACE inhibitors (e.g., enalapril)<br><input type="checkbox"/> Calcium channel blockers (e.g., amlodipine, nifedipine)<br><input type="checkbox"/> Diuretics (e.g., lasix, aldactone, hydrochlorothazide)<br><input type="checkbox"/> Angiotensin receptor blockers (e.g., losartan)<br><input type="checkbox"/> Beta blockers (e.g., atenolol)<br><input type="checkbox"/> Other |
| 7. Coronary heart disease                         | <input type="checkbox"/> Yes<br><input type="checkbox"/> No<br><input type="checkbox"/> Unknown                                                                                                                                                                                                                                                                                                          |
| 8. Heart failure                                  | <input type="checkbox"/> Yes<br><input type="checkbox"/> No<br><input type="checkbox"/> Unknown                                                                                                                                                                                                                                                                                                          |
| 9. Pulmonary hypertension                         | <input type="checkbox"/> Yes<br><input type="checkbox"/> No<br><input type="checkbox"/> Unknown                                                                                                                                                                                                                                                                                                          |
| 10. Diabetes                                      | <input type="checkbox"/> Yes<br><input type="checkbox"/> No (SKIP to #11)<br><input type="checkbox"/> Unknown (SKIP to #11)                                                                                                                                                                                                                                                                              |
| 10a. Current anti-diabetes treatment              | <input type="checkbox"/> Yes<br><input type="checkbox"/> No (SKIP to #11)<br><input type="checkbox"/> Unknown (SKIP to #11)                                                                                                                                                                                                                                                                              |
| 10b. If yes, specify anti-diabetes medications    | <input type="checkbox"/> Metformin<br><input type="checkbox"/> Glibenclamide<br><input type="checkbox"/> Gliclazide<br><input type="checkbox"/> Insulin<br><input type="checkbox"/> Unknown<br><input type="checkbox"/> Other (specify): _____                                                                                                                                                           |

**IeDEA TB SRN**

|                                                                        |                                                                                                                                                                                                                                                                                                                      |
|------------------------------------------------------------------------|----------------------------------------------------------------------------------------------------------------------------------------------------------------------------------------------------------------------------------------------------------------------------------------------------------------------|
| 10c. If yes, specify route                                             | <input type="checkbox"/> Oral<br><input type="checkbox"/> Injection<br><input type="checkbox"/> Other<br><input type="checkbox"/> Unknown                                                                                                                                                                            |
| 11. Kidney disease                                                     | <input type="checkbox"/> Yes<br><input type="checkbox"/> No (SKIP to #12)<br><input type="checkbox"/> Unknown (SKIP to #12)                                                                                                                                                                                          |
| 11a. If yes, currently on dialysis                                     | <input type="checkbox"/> Yes<br><input type="checkbox"/> No<br><input type="checkbox"/> Unknown                                                                                                                                                                                                                      |
| 12. Liver disease                                                      | <input type="checkbox"/> Yes<br><input type="checkbox"/> No (SKIP to #13)<br><input type="checkbox"/> Unknown (SKIP to #13)                                                                                                                                                                                          |
| 12a. If yes, type of liver disease.<br><br><i>Check all that apply</i> | <input type="checkbox"/> Cirrhosis<br><input type="checkbox"/> Alcohol related liver disease<br><input type="checkbox"/> Non-alcoholic fatty liver disease<br><input type="checkbox"/> Hepatitis B<br><input type="checkbox"/> Hepatitis C<br><input type="checkbox"/> Other (specify): _____                        |
| 13. Cancer                                                             | <input type="checkbox"/> Yes<br><input type="checkbox"/> No(SKIP to #14)<br><input type="checkbox"/> Unknown (SKIP to #14)                                                                                                                                                                                           |
| 13a. If yes, specify type of cancer                                    | <input type="checkbox"/> Anal<br><input type="checkbox"/> Breast<br><input type="checkbox"/> Colon<br><input type="checkbox"/> Invasive cervical<br><input type="checkbox"/> Kaposi's Sarcoma<br><input type="checkbox"/> Lung<br><input type="checkbox"/> Non-Hodgkin lymphoma<br><input type="checkbox"/> Prostate |



**leDEA TB SRN**

|                                                                        |                                                                                                                                                                                                                                                                                                            |
|------------------------------------------------------------------------|------------------------------------------------------------------------------------------------------------------------------------------------------------------------------------------------------------------------------------------------------------------------------------------------------------|
|                                                                        | <input type="checkbox"/> Skin: melanoma<br><input type="checkbox"/> Skin: non-melanoma<br><input type="checkbox"/> Unknown<br><input type="checkbox"/> Other _____                                                                                                                                         |
| 14. Immunosuppressor history                                           | <input type="checkbox"/> Yes<br><input type="checkbox"/> No (SKIP to #15)<br><input type="checkbox"/> Unknown (SKIP to #15)                                                                                                                                                                                |
| 14a. If yes, specify ongoing immunosuppressor treatment                | <input type="checkbox"/> None<br><input type="checkbox"/> Steroid (e.g., prednisone, hydrocortisone)<br><input type="checkbox"/> Biologic (e.g., infliximab, adalimumab, etanercept)<br><input type="checkbox"/> Chemotherapy<br><input type="checkbox"/> Other: _____<br><input type="checkbox"/> Unknown |
| 15. Disorder of the brain or spinal cord                               | <input type="checkbox"/> Yes<br><input type="checkbox"/> No<br><input type="checkbox"/> Unknown                                                                                                                                                                                                            |
| 16. Mental health diagnosis                                            | <input type="checkbox"/> Yes<br><input type="checkbox"/> No (SKIP to #17)<br><input type="checkbox"/> Unknown (SKIP to #17)                                                                                                                                                                                |
| 16a. If yes, Specify mental health diagnoses<br>(Check all that apply) | <input type="checkbox"/> Depression<br><input type="checkbox"/> Post-Traumatic Stress Disorder (PTSD)<br><input type="checkbox"/> Anxiety<br><input type="checkbox"/> Substance dependence<br><input type="checkbox"/> Other: _____<br><input type="checkbox"/> Unknown                                    |
| 16b. Receiving counseling for mental health diagnos(es)                | <input type="checkbox"/> Yes<br><input type="checkbox"/> No<br><input type="checkbox"/> Unknown                                                                                                                                                                                                            |

## leDEA TB SRN

|                                                            |                                                                                                                             |
|------------------------------------------------------------|-----------------------------------------------------------------------------------------------------------------------------|
| 16c. Receiving medication for mental health diagnos(es)    | <input type="checkbox"/> Yes<br><input type="checkbox"/> No<br><input type="checkbox"/> Unknown                             |
| 17. Other health condition                                 | <input type="checkbox"/> Yes<br><input type="checkbox"/> No (SKIP to #18)<br><input type="checkbox"/> Unknown (SKIP to #18) |
| 17a. Specify health condition(s).                          | <hr/> <hr/> <hr/> <hr/>                                                                                                     |
| 18. Notes on medical history<br>(Optional free text notes) | <hr/> <hr/> <hr/> <hr/> <hr/>                                                                                               |

Investigator: \_\_\_\_\_ Signature: \_\_\_\_\_ Date |\_\_|\_| / |\_\_|\_| / |\_\_|\_|\_|\_|

ID Number \_\_\_\_\_  
v1.0 26Jul2022

Medical History Page 5 of 5

## IeDEA TB SRN

| [6] HIV History                                               |                                                                                                                                                                                                                                                                                                                           |
|---------------------------------------------------------------|---------------------------------------------------------------------------------------------------------------------------------------------------------------------------------------------------------------------------------------------------------------------------------------------------------------------------|
| IeDEA/TB SRN ID                                               |                                                                                                                                                                                                                                                                                                                           |
| Type of visit                                                 | <input type="checkbox"/> Baseline                                                                                                                                                                                                                                                                                         |
| Visit date (dd/mm/yyyy)                                       | _ _ / _ _ / _ _ _ _                                                                                                                                                                                                                                                                                                       |
| <b>HIV testing</b>                                            |                                                                                                                                                                                                                                                                                                                           |
| 1. Date of most recent HIV test (dd/mm/yyyy)                  | _ _ / _ _ / _ _ _ _  or <input type="checkbox"/> Not yet done                                                                                                                                                                                                                                                             |
| 2. HIV status                                                 | <input type="checkbox"/> Positive (enter result in <b>Other Lab</b> form)<br><input type="checkbox"/> HIV testing planned (results to report in <b>Other Lab</b> form; if found to be positive, return to complete HIV care section below)<br><input type="checkbox"/> Negative within 90 days (if negative, SKIP to END) |
| <b>HIV care (if HIV positive)</b>                             |                                                                                                                                                                                                                                                                                                                           |
| 3. Date of HIV diagnosis (dd/mm/yyyy)                         | _ _ / _ _ / _ _ _ _                                                                                                                                                                                                                                                                                                       |
| 4. Enrolment into HIV care                                    | <input type="checkbox"/> Yes<br><input type="checkbox"/> No (SKIP to #6)<br><input type="checkbox"/> Unknown                                                                                                                                                                                                              |
| 5. Date of enrolment in HIV care (dd/mm/yyyy)                 | _ _ / _ _ / _ _ _ _                                                                                                                                                                                                                                                                                                       |
| 6. Previous hospitalizations for HIV complications            | <input type="checkbox"/> Yes<br><input type="checkbox"/> No (SKIP to #8)<br><input type="checkbox"/> Unknown                                                                                                                                                                                                              |
| 7. Date of most recent hospital discharge (dd/mm/yyyy)        | _ _ / _ _ / _ _ _ _                                                                                                                                                                                                                                                                                                       |
| 8. WHO stage (highest, prior to TB)                           | <input type="checkbox"/> 1 (SKIP to #14)<br><input type="checkbox"/> 2<br><input type="checkbox"/> 3<br><input type="checkbox"/> 4<br><input type="checkbox"/> Not applicable (using CDC staging)<br><input type="checkbox"/> Unknown                                                                                     |
| 9. CDC stage (highest, prior to TB)                           | <input type="checkbox"/> 1 (SKIP to #14)<br><input type="checkbox"/> 2<br><input type="checkbox"/> 3<br><input type="checkbox"/> Not applicable (using WHO staging)<br><input type="checkbox"/> Unknown                                                                                                                   |
| 10. CDC/WHO stage defining illness #1 (other than current TB) | .....<br><input type="checkbox"/> Past/resolved <input type="checkbox"/> Ongoing <input type="checkbox"/> Unknown                                                                                                                                                                                                         |

ID Number: \_\_\_\_\_  
v1.0 26Jul2022

HIV History Page 1 of 2

## IeDEA TB SRN

|                                                                  |                                                                                                                   |
|------------------------------------------------------------------|-------------------------------------------------------------------------------------------------------------------|
| 11. CDC/WHO stage defining illness #2<br>(other than current TB) | .....<br><input type="checkbox"/> Past/resolved <input type="checkbox"/> Ongoing <input type="checkbox"/> Unknown |
| 12. CDC/WHO stage defining illness #3<br>(other than current TB) | .....<br><input type="checkbox"/> Past/resolved <input type="checkbox"/> Ongoing <input type="checkbox"/> Unknown |
| 13. CDC/WHO stage defining illness #4<br>(other than current TB) | .....<br><input type="checkbox"/> Past/resolved <input type="checkbox"/> Ongoing <input type="checkbox"/> Unknown |
| 14. Currently on cotrimoxazole                                   | <input type="checkbox"/> Yes<br><input type="checkbox"/> No<br><input type="checkbox"/> Unknown                   |
| 15. ART initiated                                                | <input type="checkbox"/> Yes<br><input type="checkbox"/> No (SKIP to END)<br><input type="checkbox"/> Unknown     |
| 16. ART initiation date<br>(dd/mm/yyyy)                          | _ _ / _ _ / _ _ _ _                                                                                               |
| 17. Currently on ART (fill <b>ART form</b> )                     | <input type="checkbox"/> Yes<br><input type="checkbox"/> No                                                       |

Reminder to complete the **Other Lab Results** form (for HIV-related labs) and **ART** form!

Investigator: \_\_\_\_\_ Signature: \_\_\_\_\_ Date |\_|\_|/|\_|\_|/|\_|\_|\_|\_|

ID Number: \_\_\_\_\_  
v1.0 26Jul2022

HIV History Page 2 of 2

## IeDEA TB SRN

| [7] PREGNANCY / POST-PARTUM HISTORY and UPDATES                                                                                                       |                                                                                                                                                                                                                                                                                                  |
|-------------------------------------------------------------------------------------------------------------------------------------------------------|--------------------------------------------------------------------------------------------------------------------------------------------------------------------------------------------------------------------------------------------------------------------------------------------------|
| IeDEA/TB SRN ID                                                                                                                                       |                                                                                                                                                                                                                                                                                                  |
| Visit                                                                                                                                                 | <input type="checkbox"/> Baseline<br><input type="checkbox"/> End of Tx<br><input type="checkbox"/> 6-M Post-Tx<br><input type="checkbox"/> 12-M Post-Tx<br><input type="checkbox"/> Tx F/R/W                                                                                                    |
| Visit date (dd/mm/yyyy)                                                                                                                               | _ _ / _ _ / _ _ _ _                                                                                                                                                                                                                                                                              |
| <b>Baseline Questions (If NOT Baseline, SKIP to #4)</b>                                                                                               |                                                                                                                                                                                                                                                                                                  |
| 1. Ever pregnant, currently or in the past (baseline)                                                                                                 | <input type="checkbox"/> Yes<br><input type="checkbox"/> No (SKIP to #6)<br><input type="checkbox"/> Unknown                                                                                                                                                                                     |
| 2. If yes, number of pregnancies (including current pregnancy if pregnant) (baseline)                                                                 | _ _                                                                                                                                                                                                                                                                                              |
| 3. If yes, number of live born infants (baseline)                                                                                                     | _ _                                                                                                                                                                                                                                                                                              |
| <b>Pregnancy Status</b>                                                                                                                               |                                                                                                                                                                                                                                                                                                  |
| 4. Currently pregnant                                                                                                                                 | <input type="checkbox"/> Yes (complete <b>Pregnancy and Infant Outcomes</b> form, or update existing form)<br><input type="checkbox"/> No<br><input type="checkbox"/> Unknown                                                                                                                    |
| 5. Recent pregnancy or delivery<br>(For pregnancy ending in the <b>12 months prior to study enrolment, or any time thereafter.</b> )                  | <input type="checkbox"/> Yes (complete a separate <b>Pregnancy and Infant Outcomes</b> form for each pregnancy in this time period, or update existing form)<br><input type="checkbox"/> No<br><input type="checkbox"/> Unknown                                                                  |
| 6. Able to be pregnant in the future?                                                                                                                 | <input type="checkbox"/> Yes<br><input type="checkbox"/> No (e.g., hysterectomy, tubal ligation, menopause) → Do not need to ask pregnancy questions at future visits. <b>At future visits, update infant outcomes for recent pregnancies if applicable.</b><br><input type="checkbox"/> Unknown |
| <b>For each recent or ongoing pregnancy, complete a separate Pregnancy and Infant Outcomes form, which will be updated at subsequent study visits</b> |                                                                                                                                                                                                                                                                                                  |

Investigator: \_\_\_\_\_ Signature: \_\_\_\_\_ Date |\_|\_|/|\_|\_|/|\_|\_|\_|\_|

ID Number \_\_\_\_\_  
v1.0 26Jul2022

Pregnancy Hx Page 1 of 1

## IeDEA TB SRN

| [8] PREGNANCY and INFANT OUTCOMES                                                                                                                                                                                                                                                                                                                                                                                                                                                                                                                          |                                                                                                                                                                                                                                                                                                                                                          |                                    |                     |
|------------------------------------------------------------------------------------------------------------------------------------------------------------------------------------------------------------------------------------------------------------------------------------------------------------------------------------------------------------------------------------------------------------------------------------------------------------------------------------------------------------------------------------------------------------|----------------------------------------------------------------------------------------------------------------------------------------------------------------------------------------------------------------------------------------------------------------------------------------------------------------------------------------------------------|------------------------------------|---------------------|
| IeDEA/TB SRN ID                                                                                                                                                                                                                                                                                                                                                                                                                                                                                                                                            |                                                                                                                                                                                                                                                                                                                                                          |                                    |                     |
| Visit                                                                                                                                                                                                                                                                                                                                                                                                                                                                                                                                                      | Date (dd/mm/yyyy)                                                                                                                                                                                                                                                                                                                                        | Visit                              | Date (dd/mm/yyyy)   |
| <input type="checkbox"/> Baseline                                                                                                                                                                                                                                                                                                                                                                                                                                                                                                                          | _ _ / _ _ / _ _ _ _                                                                                                                                                                                                                                                                                                                                      | <input type="checkbox"/> End of Tx | _ _ / _ _ / _ _ _ _ |
| <input type="checkbox"/> 6-M Post-Tx                                                                                                                                                                                                                                                                                                                                                                                                                                                                                                                       | _ _ / _ _ / _ _ _ _                                                                                                                                                                                                                                                                                                                                      | <input type="checkbox"/> Tx F/R/W  | _ _ / _ _ / _ _ _ _ |
| <p style="text-align: center;"><b>Recent or Ongoing Pregnancy History and Outcomes</b></p> <ul style="list-style-type: none"> <li>Time period: <u>begin with any pregnancy ending &lt;12 months before enrollment, and continue recording any pregnancy thereafter during the study.</u></li> <li>If <b>multiple pregnancies</b>, complete a <b>separate form for each pregnancy</b> and associated infant outcomes for all infants.</li> <li><b>Revisit and update details</b>, including for new pregnancies, during subsequent study visits.</li> </ul> |                                                                                                                                                                                                                                                                                                                                                          |                                    |                     |
| 1. Pregnancy number<br>(Complete a separate form for each pregnancy ending <12 months prior to enrollment or any time thereafter.)                                                                                                                                                                                                                                                                                                                                                                                                                         | _ _                                                                                                                                                                                                                                                                                                                                                      |                                    |                     |
| 2. Outcome of recent pregnancy                                                                                                                                                                                                                                                                                                                                                                                                                                                                                                                             | <input type="checkbox"/> Ongoing<br><input type="checkbox"/> Born alive<br><input type="checkbox"/> Stillborn<br><input type="checkbox"/> Spontaneous abortion (miscarriage)<br><input type="checkbox"/> Induced abortion<br><input type="checkbox"/> Unknown                                                                                            |                                    |                     |
| 3. If ongoing, Date of last menstrual period (LMP)                                                                                                                                                                                                                                                                                                                                                                                                                                                                                                         | _ _ / _ _ / _ _ _ _ <br><input type="checkbox"/> Unknown                                                                                                                                                                                                                                                                                                 |                                    |                     |
| 4. If ongoing pregnancy, estimated date of delivery (EDD)                                                                                                                                                                                                                                                                                                                                                                                                                                                                                                  | _ _ / _ _ / _ _ _ _ <br><input type="checkbox"/> Unknown                                                                                                                                                                                                                                                                                                 |                                    |                     |
| 5. If pregnancy ended, date of delivery or other outcome                                                                                                                                                                                                                                                                                                                                                                                                                                                                                                   | _ _ / _ _ / _ _ _ _ <br><input type="checkbox"/> Unknown                                                                                                                                                                                                                                                                                                 |                                    |                     |
| 6. If born alive, term at delivery                                                                                                                                                                                                                                                                                                                                                                                                                                                                                                                         | <input type="checkbox"/> Full term (37 to 41 weeks)<br><input type="checkbox"/> Post-term (≥42 weeks)<br><input type="checkbox"/> Pre-term 34 to 36 weeks<br><input type="checkbox"/> Pre-term < 34 weeks<br><input type="checkbox"/> Unknown                                                                                                            |                                    |                     |
| 7. Did you receive any of these during pregnancy? (Check all that apply.)                                                                                                                                                                                                                                                                                                                                                                                                                                                                                  | <input type="checkbox"/> TB preventive therapy<br><input type="checkbox"/> TB treatment<br><input type="checkbox"/> ART (HIV treatment, if applicable)<br><input type="checkbox"/> None<br><input type="checkbox"/> Unsure/Unknown                                                                                                                       |                                    |                     |
| 8. Conditions or complications during pregnancy                                                                                                                                                                                                                                                                                                                                                                                                                                                                                                            | <input type="checkbox"/> Anemia, or having lower than the normal number of red blood cells<br><input type="checkbox"/> High blood pressure, swelling, or protein in the urine<br><input type="checkbox"/> Diabetes, or elevated blood sugar<br><input type="checkbox"/> Urinary tract infection(s)<br><input type="checkbox"/> Other infection(s): _____ |                                    |                     |

## IeDEA TB SRN

|                                                                                                                                                |                                                                                                                                                                                                                                                                                                                                                                                                                                                                                                                                                                                                                                                                            |
|------------------------------------------------------------------------------------------------------------------------------------------------|----------------------------------------------------------------------------------------------------------------------------------------------------------------------------------------------------------------------------------------------------------------------------------------------------------------------------------------------------------------------------------------------------------------------------------------------------------------------------------------------------------------------------------------------------------------------------------------------------------------------------------------------------------------------------|
|                                                                                                                                                | <input type="checkbox"/> Symptoms of depression (low or sad mood; lost interest in activities; changes in appetite, sleep, and energy; feelings of worthlessness, shame or guilt; thoughts that life is not worth living)<br><input type="checkbox"/> Other medical problem for the mother: _____<br><input type="checkbox"/> Problem with the baby noted during pregnancy: _____<br><input type="checkbox"/> Preterm (early) labor<br><input type="checkbox"/> Bleeding<br><input type="checkbox"/> Other: _____<br><input type="checkbox"/> None<br><input type="checkbox"/> Unsure/Unknown                                                                              |
| 9. Conditions or complications for the infant after delivery                                                                                   | <input type="checkbox"/> Pre-term birth (<37 weeks)<br><input type="checkbox"/> Low birth weight (<2500 g)<br><input type="checkbox"/> Low blood sugar<br><input type="checkbox"/> Jaundice<br><input type="checkbox"/> Birth defects<br><input type="checkbox"/> Birth injuries<br><input type="checkbox"/> Breathing problems<br><input type="checkbox"/> Slow growth / failure to thrive<br><input type="checkbox"/> Developmental delay<br><input type="checkbox"/> Neurologic problems<br><input type="checkbox"/> Other medical problems: _____<br><input type="checkbox"/> Other: _____<br><input type="checkbox"/> None<br><input type="checkbox"/> Unsure/Unknown |
| <b>Infant Live Status and TB treatment/TPT</b>                                                                                                 |                                                                                                                                                                                                                                                                                                                                                                                                                                                                                                                                                                                                                                                                            |
| 10. Number of infants born alive for <u>this pregnancy</u><br><i>(Infants from different pregnancies should be recorded on separate form.)</i> | <input type="text"/>                                                                                                                                                                                                                                                                                                                                                                                                                                                                                                                                                                                                                                                       |
| 11. TB treatment for infant 1                                                                                                                  | <input type="checkbox"/> Yes<br><input type="checkbox"/> No<br><input type="checkbox"/> Unknown                                                                                                                                                                                                                                                                                                                                                                                                                                                                                                                                                                            |
| 12. TB prevention therapy for infant 1                                                                                                         | <input type="checkbox"/> Yes<br><input type="checkbox"/> No<br><input type="checkbox"/> Unknown                                                                                                                                                                                                                                                                                                                                                                                                                                                                                                                                                                            |
| 13. Infant 1 status at 12 months of life or by 12Mo Post-Tx visits                                                                             | <input type="checkbox"/> Alive at $\geq 12$ months of age<br><input type="checkbox"/> Alive, not yet 12 months of age (update at future visit)<br><input type="checkbox"/> Deceased<br><input type="checkbox"/> Unknown                                                                                                                                                                                                                                                                                                                                                                                                                                                    |
| 14. Cause of infant 1 death, if known                                                                                                          | <input type="checkbox"/> Diagnosed TB<br><input type="checkbox"/> Pneumonia / lung infection<br><input type="checkbox"/> Other infectious cause: _____<br><input type="checkbox"/> Other non-infectious cause: _____<br><input type="checkbox"/> Decline to answer<br><input type="checkbox"/> Unknown                                                                                                                                                                                                                                                                                                                                                                     |
| 15. TB treatment for infant 2                                                                                                                  | <input type="checkbox"/> Yes<br><input type="checkbox"/> No                                                                                                                                                                                                                                                                                                                                                                                                                                                                                                                                                                                                                |

## IeDEA TB SRN

|                                                                    |                                                                                                                                                                                                                                                                                                                          |
|--------------------------------------------------------------------|--------------------------------------------------------------------------------------------------------------------------------------------------------------------------------------------------------------------------------------------------------------------------------------------------------------------------|
|                                                                    | <input type="checkbox"/> Unknown                                                                                                                                                                                                                                                                                         |
| 16. TB prevention therapy for infant 2                             | <input type="checkbox"/> Yes<br><input type="checkbox"/> No<br><input type="checkbox"/> Unknown                                                                                                                                                                                                                          |
| 17. Infant 2 status at 12 months of life or by 12Mo Post-Tx visits | <input type="checkbox"/> Alive at $\geq$ 12 months of age<br><input type="checkbox"/> Alive, not yet 12 months of age (update at future visit)<br><input type="checkbox"/> Deceased<br><input type="checkbox"/> Unknown                                                                                                  |
| 18. Cause of infant 2 death, if known                              | <input type="checkbox"/> Diagnosed TB<br><input type="checkbox"/> Pneumonia / lung infection<br><input type="checkbox"/> Other infectious cause: _____<br>_____<br><input type="checkbox"/> Other non-infectious cause: _____<br>_____<br><input type="checkbox"/> Decline to answer<br><input type="checkbox"/> Unknown |
| 19. TB treatment for infant 3                                      | <input type="checkbox"/> Yes<br><input type="checkbox"/> No<br><input type="checkbox"/> Unknown                                                                                                                                                                                                                          |
| 20. TB prevention therapy for infant 3                             | <input type="checkbox"/> Yes<br><input type="checkbox"/> No<br><input type="checkbox"/> Unknown                                                                                                                                                                                                                          |
| 21. Infant 3 status at 12 months of life or by 12Mo Post-Tx visits | <input type="checkbox"/> Alive at $\geq$ 12 months of age<br><input type="checkbox"/> Alive, not yet 12 months of age (update at future visit)<br><input type="checkbox"/> Deceased<br><input type="checkbox"/> Unknown                                                                                                  |
| 22. Cause of infant 3 death, if known                              | <input type="checkbox"/> Diagnosed TB<br><input type="checkbox"/> Pneumonia / lung infection<br><input type="checkbox"/> Other infectious cause: _____<br>_____<br><input type="checkbox"/> Other non-infectious cause: _____<br>_____<br><input type="checkbox"/> Decline to answer<br><input type="checkbox"/> Unknown |

Investigator: \_\_\_\_\_ Signature: \_\_\_\_\_ Date |\_|\_| / |\_|\_| / |\_|\_|\_|\_|

ID Number \_\_\_\_\_  
v1.0 26Jul2022

Pregnancy and Infant Outcomes Page 3 of 3



## leDEA TB SRN

| [9] VISIT AND CLINICAL EVALUATION                                       |                                                                                                                                                                                                                                                                                            |
|-------------------------------------------------------------------------|--------------------------------------------------------------------------------------------------------------------------------------------------------------------------------------------------------------------------------------------------------------------------------------------|
| <b>leDEA/TB SRN ID</b>                                                  |                                                                                                                                                                                                                                                                                            |
| Visit                                                                   | <input type="checkbox"/> Baseline<br><input type="checkbox"/> Month 1<br><input type="checkbox"/> Month 2<br><input type="checkbox"/> End of Tx<br><input type="checkbox"/> 6-M Post-Tx<br><input type="checkbox"/> 12-M Post-Tx<br><input type="checkbox"/> Tx F/R/W                      |
| Visit Date (dd/mm/yyyy)                                                 | ____/____/____                                                                                                                                                                                                                                                                             |
| <b>Details on type of visit</b>                                         |                                                                                                                                                                                                                                                                                            |
| 1. Visit type                                                           | <input type="checkbox"/> In-person visit<br><input type="checkbox"/> Phone visit<br><input type="checkbox"/> Data abstraction without patient contact<br><input type="checkbox"/> Not performed                                                                                            |
| 2. Reasons for visit not performed                                      | <input type="checkbox"/> Lost to follow up (from study)<br><input type="checkbox"/> Withdrawn<br><input type="checkbox"/> Transferred out<br><input type="checkbox"/> Death<br><input type="checkbox"/> Missed visit<br><input type="checkbox"/> Other<br><input type="checkbox"/> Unknown |
| 3. If missed visit, provide details                                     | .....<br>.....<br>.....                                                                                                                                                                                                                                                                    |
| 4. If patient is lost to follow up from study, provide details if known | .....<br>.....                                                                                                                                                                                                                                                                             |
| 5. Any adverse event to report since last visit or today                | <input type="checkbox"/> Yes<br><input type="checkbox"/> No                                                                                                                                                                                                                                |
| <b>Tx F/R/W visit only</b>                                              |                                                                                                                                                                                                                                                                                            |
| 6. Reason for Tx F/R/W study visit                                      | <input type="checkbox"/> TB Tx failure<br><input type="checkbox"/> TB recurrence assessment (SKIP TO #8)<br><input type="checkbox"/> Withdrawal requested by patient (SKIP TO #9)                                                                                                          |
| 7. TB Tx failure                                                        | <input type="checkbox"/> Confirmed (fill a <b>Treatment Outcomes</b> form)<br><input type="checkbox"/> Suspected, not confirmed<br><input type="checkbox"/> Alternative diagnosis (specify)<br>.....                                                                                       |
| 8. TB recurrence                                                        | <input type="checkbox"/> Confirmed (fill a <b>TB History and Current TB Diagnosis</b> form and a <b>Treatment Outcomes</b> form)<br><input type="checkbox"/> Suspected, not confirmed<br><input type="checkbox"/> Alternative diagnosis (specify) .....                                    |

## leDEA TB SRN

|                                                                                       |                                                                                                                     |
|---------------------------------------------------------------------------------------|---------------------------------------------------------------------------------------------------------------------|
| 9. Reason for withdrawal<br>(collected only if patient agrees)                        | .....                                                                                                               |
| <b>Baseline TB symptoms (within the past 4 weeks) – at Baseline visit only</b>        |                                                                                                                     |
| 10. Cough                                                                             | <input type="checkbox"/> Yes<br><input type="checkbox"/> No<br><input type="checkbox"/> Unknown                     |
| 10a. If yes, cough duration (weeks)                                                   | □□□                                                                                                                 |
| 10b. If yes, presence of blood (haemoptysis)                                          | <input type="checkbox"/> Yes<br><input type="checkbox"/> No<br><input type="checkbox"/> Unknown                     |
| 11. Fever                                                                             | <input type="checkbox"/> Yes<br><input type="checkbox"/> No<br><input type="checkbox"/> Unknown                     |
| 11a. If yes, fever duration (weeks)                                                   | □□□                                                                                                                 |
| 12. Night sweats                                                                      | <input type="checkbox"/> Yes<br><input type="checkbox"/> No<br><input type="checkbox"/> Unknown                     |
| 13. Weight loss                                                                       | <input type="checkbox"/> Yes<br><input type="checkbox"/> No<br><input type="checkbox"/> Unknown                     |
| 14. Chest pain                                                                        | <input type="checkbox"/> Yes<br><input type="checkbox"/> No<br><input type="checkbox"/> Unknown                     |
| 15. Dyspnea / shortness of breath                                                     | <input type="checkbox"/> Yes<br><input type="checkbox"/> No<br><input type="checkbox"/> Unknown                     |
| 16. Tiredness or fatigue                                                              | <input type="checkbox"/> Yes<br><input type="checkbox"/> No<br><input type="checkbox"/> Unknown                     |
| 17. Loss of appetite                                                                  | <input type="checkbox"/> Yes<br><input type="checkbox"/> No<br><input type="checkbox"/> Unknown                     |
| 18. Abdominal pain                                                                    | <input type="checkbox"/> Yes<br><input type="checkbox"/> No<br><input type="checkbox"/> Unknown                     |
| <b>Symptoms experienced at current visit – at all visits AFTER the baseline visit</b> |                                                                                                                     |
| 19. Cough                                                                             | <input type="checkbox"/> Yes<br><input type="checkbox"/> No                                                         |
| 19a. If yes, change since previous visit                                              | <input type="checkbox"/> Improved<br><input type="checkbox"/> Worsened or new<br><input type="checkbox"/> No change |
| 19b. If yes, presence of blood (haemoptysis)                                          | <input type="checkbox"/> Yes<br><input type="checkbox"/> No<br><input type="checkbox"/> Unknown                     |
| 20. Fever                                                                             | <input type="checkbox"/> Yes                                                                                        |

## IeDEA TB SRN

|                                                 |                                                                                                                     |
|-------------------------------------------------|---------------------------------------------------------------------------------------------------------------------|
|                                                 | <input type="checkbox"/> No                                                                                         |
| 20a. If yes, change since previous visit        | <input type="checkbox"/> Improved<br><input type="checkbox"/> Worsened or new<br><input type="checkbox"/> No change |
| 21. Night sweats                                | <input type="checkbox"/> Yes<br><input type="checkbox"/> No                                                         |
| 21a. If yes, change since previous visit        | <input type="checkbox"/> Improved<br><input type="checkbox"/> Worsened or new<br><input type="checkbox"/> No change |
| 22. Weight loss                                 | <input type="checkbox"/> Yes<br><input type="checkbox"/> No                                                         |
| 22a. If yes, change since previous visit        | <input type="checkbox"/> Improved<br><input type="checkbox"/> Worsened or new<br><input type="checkbox"/> No change |
| 23. Chest pain                                  | <input type="checkbox"/> Yes<br><input type="checkbox"/> No                                                         |
| 23a. If yes, change since previous visit        | <input type="checkbox"/> Improved<br><input type="checkbox"/> Worsened or new<br><input type="checkbox"/> No change |
| 24. Dyspnea/shortness of breath                 | <input type="checkbox"/> Yes<br><input type="checkbox"/> No                                                         |
| 24a. If yes, change since previous visit        | <input type="checkbox"/> Improved<br><input type="checkbox"/> Worsened or new<br><input type="checkbox"/> No change |
| 25. Tiredness or fatigue                        | <input type="checkbox"/> Yes<br><input type="checkbox"/> No                                                         |
| 25a. If yes, change since previous visit        | <input type="checkbox"/> Improved<br><input type="checkbox"/> Worsened or new<br><input type="checkbox"/> No change |
| 26. Loss of appetite                            | <input type="checkbox"/> Yes<br><input type="checkbox"/> No                                                         |
| 26a. If yes, change since previous visit        | <input type="checkbox"/> Improved<br><input type="checkbox"/> Worsened or new<br><input type="checkbox"/> No change |
| 27. Abdominal pain                              | <input type="checkbox"/> Yes<br><input type="checkbox"/> No                                                         |
| 27a. If yes, change since previous visit        | <input type="checkbox"/> Improved<br><input type="checkbox"/> Worsened or new<br><input type="checkbox"/> No change |
| <b>Vital signs</b>                              |                                                                                                                     |
| 28. Temperature (°Celsius)                      | _ _ . _                                                                                                             |
| 29. Height (m)<br>(for adults at baseline only) | _ . _ _  m                                                                                                          |
| 30. Weight (kgs)                                | _ _ _ . _  kg                                                                                                       |
| 31. Systolic blood pressure (mmHg)              | _ _ _                                                                                                               |

**leDEA TB SRN**

|                                                                                        |                                                                                                                                         |
|----------------------------------------------------------------------------------------|-----------------------------------------------------------------------------------------------------------------------------------------|
| 32. Diastolic blood pressure (mmHg)                                                    | _ _ _                                                                                                                                   |
| 33. Heart rate (beats/min)                                                             | _ _ _                                                                                                                                   |
| 34. Respiratory rate (breaths/min)                                                     | _ _                                                                                                                                     |
| 35. SpO2 (%)                                                                           | _ _                                                                                                                                     |
| 35a. On oxygen when SpO2 measured                                                      | <input type="checkbox"/> Yes <input type="checkbox"/> No                                                                                |
| <b>Physical signs</b>                                                                  |                                                                                                                                         |
| 36. Respiratory distress (grunting, nose flaring, chest indrawing, sweating, cyanosis) | <input type="checkbox"/> Yes <input type="checkbox"/> No                                                                                |
| 37. Crackles on pulmonary auscultation                                                 | <input type="checkbox"/> Yes <input type="checkbox"/> No                                                                                |
| 38. Wheezing on pulmonary auscultation                                                 | <input type="checkbox"/> Yes <input type="checkbox"/> No                                                                                |
| 39. Decreased lung sounds on auscultation                                              | <input type="checkbox"/> Yes <input type="checkbox"/> No                                                                                |
| 40. Skin rash                                                                          | <input type="checkbox"/> Yes (complete <b>Adverse Event</b> form)<br><input type="checkbox"/> No                                        |
| 41. Hepatomegaly                                                                       | <input type="checkbox"/> Yes (complete <b>Adverse Event</b> form)<br><input type="checkbox"/> No                                        |
| 41a. If yes, measurement below the costal margin (cm)                                  | _ _  cm                                                                                                                                 |
| 42. Cervical or supra-clavicular lymphadenopathy                                       | <input type="checkbox"/> No<br><input type="checkbox"/> Single<br><input type="checkbox"/> Multiple<br><input type="checkbox"/> Unknown |
| 43. Neurological symptoms                                                              | <input type="checkbox"/> Yes<br><input type="checkbox"/> No<br><input type="checkbox"/> Unknown                                         |
| 43a. If yes, detail symptoms                                                           | .....<br>.....<br>.....<br>.....                                                                                                        |

Investigator: \_\_\_\_\_ Signature: \_\_\_\_\_ Date |\_|\_| / |\_|\_| / |\_|\_|\_|\_|

### CRF [10] ASSIST

The Alcohol, Smoking and Substance Involvement Screening Test is a validated assessment of substance use. Due to copyright restrictions, this CRF is not included in this packet.

## IeDEA TB SRN

| [11] ADDITIONAL SMOKING HISTORY                                                                                           |                                                                                                                                                                                                                                                                                                                                                                   |
|---------------------------------------------------------------------------------------------------------------------------|-------------------------------------------------------------------------------------------------------------------------------------------------------------------------------------------------------------------------------------------------------------------------------------------------------------------------------------------------------------------|
| <b>IeDEA/TB SRN ID</b>                                                                                                    |                                                                                                                                                                                                                                                                                                                                                                   |
| Visit                                                                                                                     | <input type="checkbox"/> Baseline<br><input type="checkbox"/> End of Tx<br><input type="checkbox"/> 12-M Post-Tx<br><input type="checkbox"/> Tx F/R/W                                                                                                                                                                                                             |
| Visit date (dd/mm/yyyy)                                                                                                   | _ _ / _ _ / _ _ _ _                                                                                                                                                                                                                                                                                                                                               |
| 1. Do you currently smoke tobacco?<br>(This and the following questions also include <i>vaping</i> as a form of smoking.) | <input type="checkbox"/> Yes → SKIP to #4<br><input type="checkbox"/> No → SKIP to #2                                                                                                                                                                                                                                                                             |
| 2. If no, have you ever smoked tobacco in the past?                                                                       | <input type="checkbox"/> Yes → SKIP to #3<br><input type="checkbox"/> No / Never-smoker → END of Form                                                                                                                                                                                                                                                             |
| 3. If you stopped smoking, how long ago did you last smoke tobacco?                                                       | _ _  Days<br> _ _  Months<br> _ _  Years<br><input type="checkbox"/> Unknown                                                                                                                                                                                                                                                                                      |
| 4. For approximately how many years have you (did you) smoke?                                                             | _ _  Years<br><input type="checkbox"/> Unknown                                                                                                                                                                                                                                                                                                                    |
| 5. If you smoke(d) cigarettes, how many cigarettes do you (did you) smoke during a typical day?                           | <input type="checkbox"/> <1<br><input type="checkbox"/> 1-4<br><input type="checkbox"/> 5-10<br><input type="checkbox"/> 11-20<br><input type="checkbox"/> 21-30<br><input type="checkbox"/> 31-40<br><input type="checkbox"/> More than 40<br><input type="checkbox"/> Have taken other forms of tobacco, but not cigarettes<br><input type="checkbox"/> Unknown |

Investigator: \_\_\_\_\_ Signature: \_\_\_\_\_ Date |\_|\_|/|\_|\_|/|\_|\_|\_|\_|

ID Number \_\_\_\_\_  
v1.0 26Jul2022

Additional Smoking Hx Page 1 of 1

### **CRF [12] SGRQ**

The Saint George Respiratory Questionnaire is a validated measure of the perceived impact of respiratory symptoms on the patient's daily quality of life. Due to copyright restrictions, this CRF is not included in this packet.

### CRF [13] PHQ-9

The Patient Health Questionnaire – 9 is a validated measure which assesses presence and severity of depression symptoms as well as presence and degree of suicide risk. Due to copyright restrictions, this CRF is not included in this packet.



## IeDEA/TB SRN

| [14] SPIROMETRY                                        |                                                                                                                                                                                                                                                                                                                          |
|--------------------------------------------------------|--------------------------------------------------------------------------------------------------------------------------------------------------------------------------------------------------------------------------------------------------------------------------------------------------------------------------|
| <b>IeDEA/TB SRN ID</b>                                 |                                                                                                                                                                                                                                                                                                                          |
| Visit                                                  | <input type="checkbox"/> Month 2<br><input type="checkbox"/> End of Tx<br><input type="checkbox"/> 6-M Post-Tx                                                                                                                                                                                                           |
| Visit date (dd/mm/yyyy)                                | _ _ / _ _ / _ _ _ _                                                                                                                                                                                                                                                                                                      |
| 1. Is the patient able to perform/complete spirometry? | <input type="checkbox"/> Yes <input type="checkbox"/> No <input type="checkbox"/> Not done/not applicable                                                                                                                                                                                                                |
| 2. If no, why not?                                     | <input type="checkbox"/> Too Sick<br><input type="checkbox"/> Delirious/Demented/Confused<br><input type="checkbox"/> Has contraindication such as recent MI, surgery, PE, hemoptysis<br><input type="checkbox"/> Attempted, but unable to get good quality test<br><input type="checkbox"/> Other, please specify _____ |
| <b>Pre bronchodilator measured values</b>              |                                                                                                                                                                                                                                                                                                                          |
| 3. FVC (Liters)                                        | _ . _ _ _                                                                                                                                                                                                                                                                                                                |
| 4. FEV1 (Liters)                                       | _ . _ _ _                                                                                                                                                                                                                                                                                                                |
| 5. FEF 25-75 (Liters)                                  | _ . _ _ _                                                                                                                                                                                                                                                                                                                |
| 6. Peak Flow (PEF) (Liters/second)                     | _ _ _                                                                                                                                                                                                                                                                                                                    |
| 7. Spirometry grade/quality                            | <input type="checkbox"/> A<br><input type="checkbox"/> B<br><input type="checkbox"/> C<br><input type="checkbox"/> D<br><input type="checkbox"/> F                                                                                                                                                                       |
| <b>Post bronchodilator measured values</b>             |                                                                                                                                                                                                                                                                                                                          |
| 8. FVC value (Liters)                                  | _ . _ _ _                                                                                                                                                                                                                                                                                                                |
| 9. FEV1 value (Liters)                                 | _ . _ _ _                                                                                                                                                                                                                                                                                                                |
| 10. FEF 25-75 value (Liters)                           | _ . _ _ _                                                                                                                                                                                                                                                                                                                |
| 11. Peak Flow (PEF) (Liters/second)                    | _ _ _                                                                                                                                                                                                                                                                                                                    |
| 12. Spirometry grade/quality                           | <input type="checkbox"/> A<br><input type="checkbox"/> B<br><input type="checkbox"/> C<br><input type="checkbox"/> D<br><input type="checkbox"/> F                                                                                                                                                                       |
| <b>Final Interpretation</b>                            |                                                                                                                                                                                                                                                                                                                          |
| 13. Interpretation done by                             | <input type="checkbox"/> Spirometry technician<br><input type="checkbox"/> Pneumologist<br><input type="checkbox"/> Spirometer itself<br><input type="checkbox"/> Other                                                                                                                                                  |

ID Number \_\_\_\_\_  
 v1.0 26Jul2022

Spirometry Page 1 of 2

|                                          |                                                                                                                                                                                                                                                                                                                   |
|------------------------------------------|-------------------------------------------------------------------------------------------------------------------------------------------------------------------------------------------------------------------------------------------------------------------------------------------------------------------|
|                                          | <input type="checkbox"/> Unknown                                                                                                                                                                                                                                                                                  |
| 14. Obstructive pattern detected         | <input type="checkbox"/> Yes (FEV1/FVC < LLN) if yes fill below<br><input type="checkbox"/> No<br><input type="checkbox"/> Unknown                                                                                                                                                                                |
| 15. FEV1 (severity) % of predicted value | <input type="checkbox"/> 80%-100%<br><input type="checkbox"/> 50-80%<br><input type="checkbox"/> 30-50%<br><input type="checkbox"/> <30%                                                                                                                                                                          |
| 16. Bronchodilator Response              | <input type="checkbox"/> No change (FVC <12% & 200ml or FEV1 <12% & 200ml over baseline)<br><input type="checkbox"/> Improved (FVC 12% AND 200ml or FEV1 12% AND 200ml over baseline)<br><input type="checkbox"/> Normalized (FEV1/FVC ratio after bronchodilator normalized)<br><input type="checkbox"/> Unknown |
| 17. Restrictive pattern detected         | <input type="checkbox"/> Yes (FVC<LLN)<br><input type="checkbox"/> No<br><input type="checkbox"/> Unknown                                                                                                                                                                                                         |

Investigator: \_\_\_\_\_ Signature: \_\_\_\_\_ Date |\_\_|\_| / |\_\_|\_| / |\_\_|\_|\_|\_|

ID Number \_\_\_\_\_  
v1.0 26Jul2022

Spirometry Page 2 of 2

## leDEA TB SRN

| [15] FUNCTIONAL ASSESSMENT 1 MINUTE SIT TO STAND TEST                                                                                                                                                                                                                                                                                                 |                                                                                                                                                                                                                                                                                                                                                                                                                                                                                                                                      |
|-------------------------------------------------------------------------------------------------------------------------------------------------------------------------------------------------------------------------------------------------------------------------------------------------------------------------------------------------------|--------------------------------------------------------------------------------------------------------------------------------------------------------------------------------------------------------------------------------------------------------------------------------------------------------------------------------------------------------------------------------------------------------------------------------------------------------------------------------------------------------------------------------------|
| <b>leDEA/TB SRN ID</b>                                                                                                                                                                                                                                                                                                                                |                                                                                                                                                                                                                                                                                                                                                                                                                                                                                                                                      |
| Visit                                                                                                                                                                                                                                                                                                                                                 | <input type="checkbox"/> Baseline<br><input type="checkbox"/> Month 2<br><input type="checkbox"/> End of Tx<br><input type="checkbox"/> 6-M Post-Tx<br><input type="checkbox"/> 12-M Post-Tx                                                                                                                                                                                                                                                                                                                                         |
| Visit date (dd/mm/yyyy)                                                                                                                                                                                                                                                                                                                               | _ _ / _ _ / _ _ _ _                                                                                                                                                                                                                                                                                                                                                                                                                                                                                                                  |
| 1. Patient able to complete the sit-to-stand test                                                                                                                                                                                                                                                                                                     | <input type="checkbox"/> Yes<br><input type="checkbox"/> No<br><input type="checkbox"/> Not done / not applicable                                                                                                                                                                                                                                                                                                                                                                                                                    |
| 2. Reasons why unable                                                                                                                                                                                                                                                                                                                                 | <input type="checkbox"/> Too Sick<br><input type="checkbox"/> Delirious / Demented / Confused<br><input type="checkbox"/> Has lower extremity injury that prevents standing<br><input type="checkbox"/> Other                                                                                                                                                                                                                                                                                                                        |
| <b>At Rest</b>                                                                                                                                                                                                                                                                                                                                        |                                                                                                                                                                                                                                                                                                                                                                                                                                                                                                                                      |
| 3. SpO2 (%)                                                                                                                                                                                                                                                                                                                                           | _ _                                                                                                                                                                                                                                                                                                                                                                                                                                                                                                                                  |
| 4. Heart rate (beats per minute)                                                                                                                                                                                                                                                                                                                      | _ _ _                                                                                                                                                                                                                                                                                                                                                                                                                                                                                                                                |
| 5. Modified Borg Dyspnea Scale<br><br><i>"This is a scale that asks you to rate the difficulty of your breathing. It starts at number 0, where your breathing is causing you no difficulty at all, and progresses through to number 10, where your breathing difficulty is maximal. How much difficulty is your breathing causing you right now?"</i> | <input type="checkbox"/> 0 Nothing at all<br><input type="checkbox"/> 0.5 Very, very slight (just noticeable)<br><input type="checkbox"/> 1 Very slight<br><input type="checkbox"/> 2 Slight<br><input type="checkbox"/> 3 Moderate<br><input type="checkbox"/> 4 Somewhat severe<br><input type="checkbox"/> 5 Severe<br><input type="checkbox"/> 6<br><input type="checkbox"/> 7 Very severe<br><input type="checkbox"/> 8<br><input type="checkbox"/> 9 Very, very severe (almost maximal)<br><input type="checkbox"/> 10 Maximal |
| <b>Post sit-to-stand test</b>                                                                                                                                                                                                                                                                                                                         |                                                                                                                                                                                                                                                                                                                                                                                                                                                                                                                                      |
| 6. SpO2 (%)                                                                                                                                                                                                                                                                                                                                           | _ _                                                                                                                                                                                                                                                                                                                                                                                                                                                                                                                                  |
| 7. Heart rate (beats per minute)                                                                                                                                                                                                                                                                                                                      | _ _ _                                                                                                                                                                                                                                                                                                                                                                                                                                                                                                                                |
| 8. Modified Borg Dyspnea Scale<br><br><i>"This is a scale that asks you to rate the difficulty of your breathing. It starts at number 0, where your breathing is causing you no difficulty at all, and progresses through to number 10, where your breathing difficulty is maximal. How much difficulty is your breathing causing you right now?"</i> | <input type="checkbox"/> 0 Nothing at all<br><input type="checkbox"/> 0.5 Very, very slight (just noticeable)<br><input type="checkbox"/> 1 Very slight<br><input type="checkbox"/> 2 Slight<br><input type="checkbox"/> 3 Moderate<br><input type="checkbox"/> 4 Somewhat severe<br><input type="checkbox"/> 5 Severe<br><input type="checkbox"/> 6<br><input type="checkbox"/> 7 Very severe<br><input type="checkbox"/> 8<br><input type="checkbox"/> 9 Very, very severe (almost maximal)<br><input type="checkbox"/> 10 Maximal |
| 9. Number of sit-to-stands completed in 1 min                                                                                                                                                                                                                                                                                                         | _ _                                                                                                                                                                                                                                                                                                                                                                                                                                                                                                                                  |

Investigator: \_\_\_\_\_ Signature: \_\_\_\_\_ Date |\_|\_|/|\_|\_|/|\_|\_|\_|\_|

ID Number \_\_\_\_\_  
v1.0 26Jul2022

Stand Test Page 1 of 1

## IeDEA TB SRN

| [16] TB MICROBIOLOGY                                                                                                                                                                                                                      |                                                                                                                                                                                                                                                        |
|-------------------------------------------------------------------------------------------------------------------------------------------------------------------------------------------------------------------------------------------|--------------------------------------------------------------------------------------------------------------------------------------------------------------------------------------------------------------------------------------------------------|
| IeDEA/TB SRN ID                                                                                                                                                                                                                           |                                                                                                                                                                                                                                                        |
| Visit                                                                                                                                                                                                                                     | <input type="checkbox"/> Baseline<br><input type="checkbox"/> Month 1<br><input type="checkbox"/> Month 2<br><input type="checkbox"/> End of Tx<br><input type="checkbox"/> TX F/R/W                                                                   |
| Visit date (dd/mm/yyyy)                                                                                                                                                                                                                   | _ _ / _ _ / _ _ _ _                                                                                                                                                                                                                                    |
| <b>Instructions:</b> Enter all available test results which may have been performed or which may have resulted since the last study visit. If this is the baseline visit, enter all available results to date for this TB illness course. |                                                                                                                                                                                                                                                        |
| <b>Smear microscopy</b>                                                                                                                                                                                                                   |                                                                                                                                                                                                                                                        |
| 1. Number of smears done (If none, enter '0')                                                                                                                                                                                             | <input type="checkbox"/> 0 (SKIP TO #5)<br><input type="checkbox"/> 1<br><input type="checkbox"/> 2<br><input type="checkbox"/> 3 or more<br><input type="checkbox"/> Unknown                                                                          |
| 2. Smear 1 date (dd/mm/yyyy)                                                                                                                                                                                                              | _ _ / _ _ / _ _ _ _                                                                                                                                                                                                                                    |
| 2a. Smear 1 type of sample                                                                                                                                                                                                                | <input type="checkbox"/> Expecterated sputum<br><input type="checkbox"/> Other: _____<br><input type="checkbox"/> Unknown                                                                                                                              |
| 2b. Smear 1 result                                                                                                                                                                                                                        | <input type="checkbox"/> Negative<br><input type="checkbox"/> Scanty<br><input type="checkbox"/> 1+<br><input type="checkbox"/> 2+ (++)<br><input type="checkbox"/> 3+ (+++)<br><input type="checkbox"/> 4+ (++++)<br><input type="checkbox"/> Unknown |
| 3. Smear 2 date (dd/mm/yyyy)                                                                                                                                                                                                              | _ _ / _ _ / _ _ _ _                                                                                                                                                                                                                                    |
| 3a. Smear 2 type of sample                                                                                                                                                                                                                | <input type="checkbox"/> Expecterated sputum<br><input type="checkbox"/> Other: _____<br><input type="checkbox"/> Unknown                                                                                                                              |
| 3b. Smear 2 result                                                                                                                                                                                                                        | <input type="checkbox"/> Negative<br><input type="checkbox"/> Scanty<br><input type="checkbox"/> 1+<br><input type="checkbox"/> 2+ (++)<br><input type="checkbox"/> 3+ (+++)<br><input type="checkbox"/> 4+ (++++)<br><input type="checkbox"/> Unknown |
| 4. Smear 3 date (dd/mm/yyyy)                                                                                                                                                                                                              | _ _ / _ _ / _ _ _ _                                                                                                                                                                                                                                    |
| 4a. Smear 3 type of sample                                                                                                                                                                                                                | <input type="checkbox"/> Expecterated sputum<br><input type="checkbox"/> Other: _____<br><input type="checkbox"/> Unknown                                                                                                                              |
| 4b. Smear 3 result                                                                                                                                                                                                                        | <input type="checkbox"/> Negative<br><input type="checkbox"/> Scanty<br><input type="checkbox"/> 1+<br><input type="checkbox"/> 2+ (++)                                                                                                                |

## IeDEA TB SRN

|                                                       |                                                                                                                                                                                |
|-------------------------------------------------------|--------------------------------------------------------------------------------------------------------------------------------------------------------------------------------|
|                                                       | <input type="checkbox"/> 3+ (+++)<br><input type="checkbox"/> 4+ (++++)<br><input type="checkbox"/> Unknown                                                                    |
| <b>Xpert MTB/RIF or Ultra</b>                         |                                                                                                                                                                                |
| 5. Number of Xpert tests done<br>(If none, enter '0') | <input type="checkbox"/> 0 (SKIP TO #10)<br><input type="checkbox"/> 1<br><input type="checkbox"/> 2<br><input type="checkbox"/> 3 or more<br><input type="checkbox"/> Unknown |
| 6. Xpert TB type of test                              | <input type="checkbox"/> Xpert MTB/RIF<br><input type="checkbox"/> Xpert MTB/RIF Ultra<br><input type="checkbox"/> Other<br><input type="checkbox"/> Unknown                   |
| 7. Xpert TB test 1 date (dd/mm/yyyy)                  | _ _ / _ _ / _ _ _ _                                                                                                                                                            |
| 7a. Xpert TB test 1 type of sample                    | <input type="checkbox"/> Expectorated sputum<br><input type="checkbox"/> Other: _____<br><input type="checkbox"/> Unknown                                                      |
| 7b. Xpert TB test 1 MTB result                        | <input type="checkbox"/> Detected (MTB+)<br><input type="checkbox"/> Not detected (MTB-)<br><input type="checkbox"/> Indeterminate/error<br><input type="checkbox"/> Unknown   |
| 7c. Xpert TB test 1 result category                   | <input type="checkbox"/> Trace<br><input type="checkbox"/> Very low<br><input type="checkbox"/> Low<br><input type="checkbox"/> Medium<br><input type="checkbox"/> High        |
| 7d. Xpert TB test 1 RIF resistance                    | <input type="checkbox"/> Detected<br><input type="checkbox"/> Not detected<br><input type="checkbox"/> Indeterminate<br><input type="checkbox"/> Unknown                       |
| 8. Xpert TB test 2 date (dd/mm/yyyy)                  | _ _ / _ _ / _ _ _ _                                                                                                                                                            |
| 8a. Xpert TB test 2 type of sample                    | <input type="checkbox"/> Expectorated sputum<br><input type="checkbox"/> Other: _____<br><input type="checkbox"/> Unknown                                                      |
| 8b. Xpert TB test 2 MTB result                        | <input type="checkbox"/> Detected (MTB+)<br><input type="checkbox"/> Not detected (MTB-)<br><input type="checkbox"/> Indeterminate/error<br><input type="checkbox"/> Unknown   |
| 8c. Xpert TB test 2 result category                   | <input type="checkbox"/> Trace<br><input type="checkbox"/> Very low<br><input type="checkbox"/> Low<br><input type="checkbox"/> Medium<br><input type="checkbox"/> High        |
| 8d. Xpert TB test 2 RIF resistance                    | <input type="checkbox"/> Detected<br><input type="checkbox"/> Not detected<br><input type="checkbox"/> Indeterminate<br><input type="checkbox"/> Unknown                       |
| 9. Xpert TB test 3 date (dd/mm/yyyy)                  | _ _ / _ _ / _ _ _ _                                                                                                                                                            |

## IeDEA TB SRN

|                                                          |                                                                                                                                                                                                                                                                                                                     |
|----------------------------------------------------------|---------------------------------------------------------------------------------------------------------------------------------------------------------------------------------------------------------------------------------------------------------------------------------------------------------------------|
| 9a. Xpert TB test 3 type of sample                       | <input type="checkbox"/> Expectorated sputum<br><input type="checkbox"/> Other: _____<br><input type="checkbox"/> Unknown                                                                                                                                                                                           |
| 9b. Xpert TB test 3 MTB result                           | <input type="checkbox"/> Detected (MTB+)<br><input type="checkbox"/> Not detected (MTB-)<br><input type="checkbox"/> Indeterminate/error<br><input type="checkbox"/> Unknown                                                                                                                                        |
| 9c. Xpert TB test 3 result category                      | <input type="checkbox"/> Trace<br><input type="checkbox"/> Very low<br><input type="checkbox"/> Low<br><input type="checkbox"/> Medium<br><input type="checkbox"/> High                                                                                                                                             |
| 9d. Xpert TB test 3 RIF resistance                       | <input type="checkbox"/> Detected<br><input type="checkbox"/> Not detected<br><input type="checkbox"/> Indeterminate<br><input type="checkbox"/> Unknown                                                                                                                                                            |
| <b>TB Culture</b>                                        |                                                                                                                                                                                                                                                                                                                     |
| 10. Number of cultures done<br>(If none, enter '0')      | <input type="checkbox"/> 0 (SKIP TO #15)<br><input type="checkbox"/> 1<br><input type="checkbox"/> 2<br><input type="checkbox"/> 3 or more<br><input type="checkbox"/> Unknown                                                                                                                                      |
| 11. Type of TB culture                                   | <input type="checkbox"/> Lowenstein Jensen (LJ)<br><input type="checkbox"/> MGIT<br><input type="checkbox"/> LJ and MGIT<br><input type="checkbox"/> Unknown                                                                                                                                                        |
| 12. TB Culture 1 start date<br>(dd/mm/yyyy)              | _ _ / _ _ / _ _ _ _                                                                                                                                                                                                                                                                                                 |
| 12a. TB Culture 1 type of sample                         | <input type="checkbox"/> Expectorated sputum<br><input type="checkbox"/> Other: _____<br><input type="checkbox"/> Unknown                                                                                                                                                                                           |
| 12b. TB Culture 1 result date<br>(positivity or sterile) | _ _ / _ _ / _ _ _ _                                                                                                                                                                                                                                                                                                 |
| 12c. TB Culture 1 result                                 | <input type="checkbox"/> Pending (mark form as <b>Incomplete</b> and update result if/when available)<br><input type="checkbox"/> Positive MTB<br><input type="checkbox"/> Positive NTM<br><input type="checkbox"/> Contaminated<br><input type="checkbox"/> Negative (sterile)<br><input type="checkbox"/> Unknown |
| 13. TB Culture 2 start date<br>(dd/mm/yyyy)              | _ _ / _ _ / _ _ _ _                                                                                                                                                                                                                                                                                                 |
| 13a. TB Culture 2 type of sample                         | <input type="checkbox"/> Expectorated sputum<br><input type="checkbox"/> Other: _____<br><input type="checkbox"/> Unknown                                                                                                                                                                                           |
| 13b. TB Culture 2 result date<br>(positivity or sterile) | _ _ / _ _ / _ _ _ _                                                                                                                                                                                                                                                                                                 |
| 13c. TB Culture 2 result                                 | <input type="checkbox"/> Pending (mark form as <b>Incomplete</b> and update result if/when available)<br><input type="checkbox"/> Positive MTB<br><input type="checkbox"/> Positive NTM                                                                                                                             |

## IeDEA TB SRN

|                                                                                               |                                                                                                                                                                                                                                                                                                                     |                            |                            |                              |
|-----------------------------------------------------------------------------------------------|---------------------------------------------------------------------------------------------------------------------------------------------------------------------------------------------------------------------------------------------------------------------------------------------------------------------|----------------------------|----------------------------|------------------------------|
|                                                                                               | <input type="checkbox"/> Contaminated<br><input type="checkbox"/> Negative (sterile)<br><input type="checkbox"/> Unknown                                                                                                                                                                                            |                            |                            |                              |
| 14. TB Culture 3 start date<br>(dd/mm/yyyy)                                                   | _ _ / _ _ / _ _ _ _                                                                                                                                                                                                                                                                                                 |                            |                            |                              |
| 14a. TB Culture 3 type of sample                                                              | <input type="checkbox"/> Expecterated sputum<br><input type="checkbox"/> Other: _____<br><input type="checkbox"/> Unknown                                                                                                                                                                                           |                            |                            |                              |
| 14b. TB Culture 3 result date<br>(positivity or sterile)                                      | _ _ / _ _ / _ _ _ _                                                                                                                                                                                                                                                                                                 |                            |                            |                              |
| 14c. TB Culture 3 result                                                                      | <input type="checkbox"/> Pending (mark form as <b>Incomplete</b> and update result if/when available)<br><input type="checkbox"/> Positive MTB<br><input type="checkbox"/> Positive NTM<br><input type="checkbox"/> Contaminated<br><input type="checkbox"/> Negative (sterile)<br><input type="checkbox"/> Unknown |                            |                            |                              |
| <b>Drug susceptibility testing</b>                                                            |                                                                                                                                                                                                                                                                                                                     |                            |                            |                              |
| 15. 1 <sup>st</sup> line TB drug-susceptibility testing done                                  | <input type="checkbox"/> Yes (fill below)<br><input type="checkbox"/> No (SKIP TO #20)<br><input type="checkbox"/> Unknown                                                                                                                                                                                          |                            |                            |                              |
| 16. Type(s) of 1 <sup>st</sup> line TB-drug susceptibility testing<br>(Check all that apply)  | <input type="checkbox"/> Culture-based DST<br><input type="checkbox"/> Genotypic DST (MTBDRplus / LPA-1)<br><input type="checkbox"/> Xpert Ultra<br><input type="checkbox"/> Other: _____<br><input type="checkbox"/> Unknown                                                                                       |                            |                            |                              |
| 17. Date of sample, 1 <sup>st</sup> line DST                                                  | _ _ / _ _ / _ _ _ _                                                                                                                                                                                                                                                                                                 |                            |                            |                              |
| 17a. Type of sample, 1 <sup>st</sup> line DST                                                 | <input type="checkbox"/> Expecterated sputum<br><input type="checkbox"/> Other: _____<br><input type="checkbox"/> Unknown                                                                                                                                                                                           |                            |                            |                              |
| 17b. For each first-line drug, indicate results of DST.                                       | Isoniazid (INH)                                                                                                                                                                                                                                                                                                     | <input type="checkbox"/> S | <input type="checkbox"/> R | <input type="checkbox"/> Unk |
|                                                                                               | Rifampin (RIF)                                                                                                                                                                                                                                                                                                      | <input type="checkbox"/> S | <input type="checkbox"/> R | <input type="checkbox"/> Unk |
|                                                                                               | Pyrazinamide (PZA)                                                                                                                                                                                                                                                                                                  | <input type="checkbox"/> S | <input type="checkbox"/> R | <input type="checkbox"/> Unk |
|                                                                                               | Ethambutol (EMB)                                                                                                                                                                                                                                                                                                    | <input type="checkbox"/> S | <input type="checkbox"/> R | <input type="checkbox"/> Unk |
|                                                                                               | Streptomycin (SM)                                                                                                                                                                                                                                                                                                   | <input type="checkbox"/> S | <input type="checkbox"/> R | <input type="checkbox"/> Unk |
| 18. 2 <sup>nd</sup> line TB drug-susceptibility testing done                                  | <input type="checkbox"/> Yes (if yes fill below)<br><input type="checkbox"/> No<br><input type="checkbox"/> Unknown                                                                                                                                                                                                 |                            |                            |                              |
| 18a. Type(s) of 2 <sup>nd</sup> line TB-drug susceptibility testing<br>(Check all that apply) | <input type="checkbox"/> Culture-based DST<br><input type="checkbox"/> Genotypic DST (MTBDRsl / LPA-2)<br><input type="checkbox"/> Xpert MTB-XDR<br><input type="checkbox"/> Other: _____<br><input type="checkbox"/> Unknown                                                                                       |                            |                            |                              |
| 18b. For each second-line drug, indicate results of DST.                                      | Bedaquiline                                                                                                                                                                                                                                                                                                         | <input type="checkbox"/> S | <input type="checkbox"/> R | <input type="checkbox"/> Unk |
|                                                                                               | Moxifloxacin                                                                                                                                                                                                                                                                                                        | <input type="checkbox"/> S | <input type="checkbox"/> R | <input type="checkbox"/> Unk |
|                                                                                               | Levofloxacin                                                                                                                                                                                                                                                                                                        | <input type="checkbox"/> S | <input type="checkbox"/> R | <input type="checkbox"/> Unk |
|                                                                                               | Ciprofloxacin                                                                                                                                                                                                                                                                                                       | <input type="checkbox"/> S | <input type="checkbox"/> R | <input type="checkbox"/> Unk |
|                                                                                               | Linezolid                                                                                                                                                                                                                                                                                                           | <input type="checkbox"/> S | <input type="checkbox"/> R | <input type="checkbox"/> Unk |
|                                                                                               | Clofazimine                                                                                                                                                                                                                                                                                                         | <input type="checkbox"/> S | <input type="checkbox"/> R | <input type="checkbox"/> Unk |
|                                                                                               | Cycloserine                                                                                                                                                                                                                                                                                                         | <input type="checkbox"/> S | <input type="checkbox"/> R | <input type="checkbox"/> Unk |

## IeDEA TB SRN

|                                               |                                                                                                                 |                            |                            |                              |
|-----------------------------------------------|-----------------------------------------------------------------------------------------------------------------|----------------------------|----------------------------|------------------------------|
|                                               | Amikacin                                                                                                        | <input type="checkbox"/> S | <input type="checkbox"/> R | <input type="checkbox"/> Unk |
|                                               | Carbapenems                                                                                                     | <input type="checkbox"/> S | <input type="checkbox"/> R | <input type="checkbox"/> Unk |
|                                               | Delaminid                                                                                                       | <input type="checkbox"/> S | <input type="checkbox"/> R | <input type="checkbox"/> Unk |
|                                               | Ethionamide                                                                                                     | <input type="checkbox"/> S | <input type="checkbox"/> R | <input type="checkbox"/> Unk |
|                                               | Prothionamide                                                                                                   | <input type="checkbox"/> S | <input type="checkbox"/> R | <input type="checkbox"/> Unk |
|                                               | Kanamycin                                                                                                       | <input type="checkbox"/> S | <input type="checkbox"/> R | <input type="checkbox"/> Unk |
|                                               | P-aminosalicylic acid                                                                                           | <input type="checkbox"/> S | <input type="checkbox"/> R | <input type="checkbox"/> Unk |
|                                               | Capreomycin                                                                                                     | <input type="checkbox"/> S | <input type="checkbox"/> R | <input type="checkbox"/> Unk |
|                                               | Azithromycin                                                                                                    | <input type="checkbox"/> S | <input type="checkbox"/> R | <input type="checkbox"/> Unk |
|                                               | Clarithromycin                                                                                                  | <input type="checkbox"/> S | <input type="checkbox"/> R | <input type="checkbox"/> Unk |
|                                               | Amoxicillin-clavulanate                                                                                         | <input type="checkbox"/> S | <input type="checkbox"/> R | <input type="checkbox"/> Unk |
|                                               | Other<br>(specify) _____                                                                                        | <input type="checkbox"/> S | <input type="checkbox"/> R | <input type="checkbox"/> Unk |
|                                               | Other<br>(specify) _____                                                                                        | <input type="checkbox"/> S | <input type="checkbox"/> R | <input type="checkbox"/> Unk |
| <b>Urine LAM test</b>                         |                                                                                                                 |                            |                            |                              |
| 20. Urine LAM test done                       | <input type="checkbox"/> Yes<br><input type="checkbox"/> No<br><input type="checkbox"/> Unknown                 |                            |                            |                              |
| 20a. Type of urine LAM test done              | <input type="checkbox"/> Alere LAM<br><input type="checkbox"/> Fujifilm LAM<br><input type="checkbox"/> Unknown |                            |                            |                              |
| 20b. Date urine LAM test done<br>(dd/mm/yyyy) | _ _ / _ _ / _ _ _ _                                                                                             |                            |                            |                              |
| 20c. Results of urine LAM test                | <input type="checkbox"/> Positive<br><input type="checkbox"/> Negative<br><input type="checkbox"/> Unknown      |                            |                            |                              |

Investigator: \_\_\_\_\_ Signature: \_\_\_\_\_ Date |\_|\_|/|\_|\_|/|\_|\_|\_|\_|

ID Number \_\_\_\_\_  
v1.0 26Jul2022

TB Microbiology Page 5 of 5



## IeDEA TB SRN

| [17] OTHER LABORATORY RESULTS                                                                                                                                                                                                                                                                                        |                                                                                                                                                                                                                                                                       |
|----------------------------------------------------------------------------------------------------------------------------------------------------------------------------------------------------------------------------------------------------------------------------------------------------------------------|-----------------------------------------------------------------------------------------------------------------------------------------------------------------------------------------------------------------------------------------------------------------------|
| <b>IeDEA/TB SRN ID</b>                                                                                                                                                                                                                                                                                               |                                                                                                                                                                                                                                                                       |
| Visit                                                                                                                                                                                                                                                                                                                | <input type="checkbox"/> Baseline<br><input type="checkbox"/> Month 1<br><input type="checkbox"/> Month 2<br><input type="checkbox"/> End of Tx<br><input type="checkbox"/> 6-M Post-Tx<br><input type="checkbox"/> 12-M Post-Tx<br><input type="checkbox"/> Tx F/R/W |
| Visit date (dd/mm/yyyy)                                                                                                                                                                                                                                                                                              | _ _ / _ _ / _ _ _ _                                                                                                                                                                                                                                                   |
| <b>Instructions:</b> Enter results for any new lab results since last study visit. If multiple tests were done for a given item, use the most recent. Exception: If a positive HIV diagnostic test, positive COVID diagnostic test, or unsuppressed HIV viral load, <u>enter the first positive/abnormal result.</u> |                                                                                                                                                                                                                                                                       |
| <b>HIV related tests</b>                                                                                                                                                                                                                                                                                             |                                                                                                                                                                                                                                                                       |
| 1. HIV test done                                                                                                                                                                                                                                                                                                     | <input type="checkbox"/> Yes<br><input type="checkbox"/> No<br><input type="checkbox"/> Unknown                                                                                                                                                                       |
| 2. HIV test date (dd/mm/yyyy)                                                                                                                                                                                                                                                                                        | _ _ / _ _ / _ _ _ _                                                                                                                                                                                                                                                   |
| 3. HIV test result                                                                                                                                                                                                                                                                                                   | <input type="checkbox"/> Positive<br><input type="checkbox"/> Negative<br><input type="checkbox"/> Unknown                                                                                                                                                            |
| 4. CD4 T-cell count                                                                                                                                                                                                                                                                                                  | <input type="checkbox"/>  _ _ _ _  /mm <sup>3</sup><br><input type="checkbox"/>  _ _  .  _ _  %<br><input type="checkbox"/> Not done<br><input type="checkbox"/> Not applicable<br>Date (dd/mm/yyyy):  _ _ / _ _ / _ _ _ _                                            |
| 5. HIV viral load                                                                                                                                                                                                                                                                                                    | <input type="checkbox"/>  _ _ _ _ _ _ _ _  cp/ml<br><input type="checkbox"/> Undetectable<br><input type="checkbox"/> Not done<br><input type="checkbox"/> Not applicable<br>Date (dd/mm/yyyy):  _ _ / _ _ / _ _ _ _                                                  |
| <b>COVID-19 tests</b>                                                                                                                                                                                                                                                                                                |                                                                                                                                                                                                                                                                       |
| 6. COVID test                                                                                                                                                                                                                                                                                                        | <input type="checkbox"/> Done<br><input type="checkbox"/> Not done                                                                                                                                                                                                    |
| <b>If a COVID test was done, specify details below. If there was a positive test, record the results for the positive test. (If multiple positive tests, record the details for the first positive test.)</b>                                                                                                        |                                                                                                                                                                                                                                                                       |
| 7. COVID test date                                                                                                                                                                                                                                                                                                   | Date (dd/mm/yyyy):  _ _ / _ _ / _ _ _ _                                                                                                                                                                                                                               |

## IeDEA TB SRN

|                                      |                                                                                                                                                                                    |
|--------------------------------------|------------------------------------------------------------------------------------------------------------------------------------------------------------------------------------|
| <b>8. COVID-19 test type</b>         | <input type="checkbox"/> Molecular test / PCR<br><input type="checkbox"/> Antigen test (e.g., rapid test)<br><input type="checkbox"/> Unknown                                      |
| <b>9. COVID-19 test result</b>       | <input type="checkbox"/> Positive<br><input type="checkbox"/> Negative<br><input type="checkbox"/> Indeterminate                                                                   |
| <b>Complete blood count (CBC)</b>    |                                                                                                                                                                                    |
| <b>10. CBC</b>                       | <input type="checkbox"/> Done<br><input type="checkbox"/> Not done<br><input type="checkbox"/> Not applicable                                                                      |
| <b>11. CBC Date</b>                  | Date (dd/mm/yyyy):  _ _ / _ _ / _ _ _ _                                                                                                                                            |
| 11a. Hemoglobin                      | _ _  .  _  <input type="checkbox"/> g/dl <input type="checkbox"/> g/L                                                                                                              |
| 11b. White blood cells               | _ _ _ _ _  .  _  <input type="checkbox"/> /mm <sup>3</sup> <input type="checkbox"/> x10 <sup>3</sup> /μL <input type="checkbox"/> giga (10 <sup>9</sup> )/L                        |
| 11c. Monocytes (absolute)            | _ _ _ _ _  .  _  <input type="checkbox"/> /mm <sup>3</sup> <input type="checkbox"/> x10 <sup>3</sup> /μL <input type="checkbox"/> giga (10 <sup>9</sup> )/L                        |
| 11d. Neutrophils (absolute)          | _ _ _ _ _  .  _  <input type="checkbox"/> /mm <sup>3</sup> <input type="checkbox"/> x10 <sup>3</sup> /μL <input type="checkbox"/> giga (10 <sup>9</sup> )/L                        |
| 11e. Eosinophils (absolute)          | _ _ _ _ _  .  _  <input type="checkbox"/> /mm <sup>3</sup> <input type="checkbox"/> x10 <sup>3</sup> /μL <input type="checkbox"/> giga (10 <sup>9</sup> )/L                        |
| 11f. Lymphocytes (absolute)          | _ _ _ _ _  .  _  <input type="checkbox"/> /mm <sup>3</sup> <input type="checkbox"/> x10 <sup>3</sup> /μL <input type="checkbox"/> giga (10 <sup>9</sup> )/L                        |
| 11g. Platelets                       | _ _ _ _ _  .  _  <input type="checkbox"/> x10 <sup>3</sup> /mm <sup>3</sup> <input type="checkbox"/> /μL                                                                           |
| <b>Biochemistry</b>                  |                                                                                                                                                                                    |
| 12. Hemoglobin A1c (HbA1c)           | _  .  _  % <input type="checkbox"/> Not done<br>Date (dd/mm/yyyy):  _ _ / _ _ / _ _ _ _                                                                                            |
| 13. Random blood glucose             | _ _  .  _  <input type="checkbox"/> mmol/L <input type="checkbox"/> mg/L <input type="checkbox"/> g/L <input type="checkbox"/> Not done<br>Date (dd/mm/yyyy):  _ _ / _ _ / _ _ _ _ |
| 14. C-reactive protein (CRP)         | _ _  mg/L <input type="checkbox"/> Not done<br>Date (dd/mm/yyyy):  _ _ / _ _ / _ _ _ _                                                                                             |
| 15. Procalcitonin                    | _ _  .  _  μg/L <input type="checkbox"/> Not done<br>Date (dd/mm/yyyy):  _ _ / _ _ / _ _ _ _                                                                                       |
| <b>Biochemistry: Metabolic Panel</b> |                                                                                                                                                                                    |
| <b>16. Metabolic Panel</b>           | <input type="checkbox"/> Done<br><input type="checkbox"/> Not done<br><input type="checkbox"/> Not applicable                                                                      |
| <b>17. Metabolic Panel Date</b>      | Date (dd/mm/yyyy):  _ _ / _ _ / _ _ _ _                                                                                                                                            |

## IeDEA TB SRN

|                           |                                                                                                                   |
|---------------------------|-------------------------------------------------------------------------------------------------------------------|
| 17a. ALT (SGPT)           | <input type="text"/> <input type="checkbox"/> mg/L <input type="checkbox"/> mg/dL <input type="checkbox"/> UI/L   |
| 17b. AST (SGOT)           | <input type="text"/> <input type="checkbox"/> mg/L <input type="checkbox"/> mg/dL <input type="checkbox"/> UI/L   |
| 17c. Creatinine           | <input type="text"/> <input type="checkbox"/> μmol/L <input type="checkbox"/> mg/L <input type="checkbox"/> mg/dL |
| 17d. Alkaline phosphatase | <input type="text"/> UI/L                                                                                         |
| 17e. Total bilirubin      | <input type="text"/> mg/L                                                                                         |
| 17f. Conjugated bilirubin | <input type="text"/> mg/L                                                                                         |
| 17g. Sodium               | <input type="text"/> mmol/L                                                                                       |
| 17h. Potassium            | <input type="text"/> mmol/L                                                                                       |

Investigator: \_\_\_\_\_ Signature: \_\_\_\_\_ Date  /  / ID Number \_\_\_\_\_  
v1.0 26Jul2022

Other Labs Page 3 of 3

## IeDEA TB SRN

| [18] CHEST X-RAY RESULTS                                  |                                                                                                                                                                                                                                                                                                                                                                                                                                                                                                                                                                 |
|-----------------------------------------------------------|-----------------------------------------------------------------------------------------------------------------------------------------------------------------------------------------------------------------------------------------------------------------------------------------------------------------------------------------------------------------------------------------------------------------------------------------------------------------------------------------------------------------------------------------------------------------|
| <b>IeDEA/TB SRN ID</b>                                    |                                                                                                                                                                                                                                                                                                                                                                                                                                                                                                                                                                 |
| Visit                                                     | <input type="checkbox"/> Baseline<br><input type="checkbox"/> Month 1<br><input type="checkbox"/> Month 2<br><input type="checkbox"/> End of Tx<br><input type="checkbox"/> 6-M Post-Tx<br><input type="checkbox"/> 12-M Post-Tx<br><input type="checkbox"/> Tx F/R/W                                                                                                                                                                                                                                                                                           |
| Visit date (dd/mm/yyyy)                                   | <input type="text"/>                                                                                                                                                                                                                                                                                                                                                                                                                                                                                                                                            |
| 1. Was an x-ray performed (at any time since last visit)? | <input type="checkbox"/> Yes<br><input type="checkbox"/> No (End of form)                                                                                                                                                                                                                                                                                                                                                                                                                                                                                       |
| 2. Date of chest x-ray                                    | <input type="text"/>                                                                                                                                                                                                                                                                                                                                                                                                                                                                                                                                            |
| 3. Interpreter                                            | <input type="checkbox"/> Clinician<br><input type="checkbox"/> Research assistant<br><input type="checkbox"/> Radiologist<br><input type="checkbox"/> Other                                                                                                                                                                                                                                                                                                                                                                                                     |
| 4. Quality of chest X-ray                                 | Patient identification: <input type="checkbox"/> Appropriate <input type="checkbox"/> Not acceptable<br>Rotation: <input type="checkbox"/> Absence or minimal <input type="checkbox"/> Not acceptable<br>Penetration: <input type="checkbox"/> Good (vertebra visible behind heart) <input type="checkbox"/> Not acceptable<br>Inspiration: <input type="checkbox"/> Good (8 <sup>th</sup> or 9 <sup>th</sup> posterior rib visible) <input type="checkbox"/> Not acceptable<br>Defective lung fields: <input type="checkbox"/> No <input type="checkbox"/> Yes |
| 4a. Result:                                               | <input type="checkbox"/> Normal (in both lungs)<br><input type="checkbox"/> Abnormal                                                                                                                                                                                                                                                                                                                                                                                                                                                                            |
| 5. Cavitation                                             | <input type="checkbox"/> Yes (present)<br><input type="checkbox"/> No (absent)<br><input type="checkbox"/> Not possible to determine based on test                                                                                                                                                                                                                                                                                                                                                                                                              |
| 5a. If yes,                                               | <input type="checkbox"/> Unilateral<br><input type="checkbox"/> Bilateral                                                                                                                                                                                                                                                                                                                                                                                                                                                                                       |
| 6. Miliary Lesions                                        | <input type="checkbox"/> Yes<br><input type="checkbox"/> No<br><input type="checkbox"/> Not possible to determine based on test                                                                                                                                                                                                                                                                                                                                                                                                                                 |
| 7. Alveolar opacity(ies) (infiltrate)                     | <input type="checkbox"/> Yes<br><input type="checkbox"/> No<br><input type="checkbox"/> Not possible to determine based on test                                                                                                                                                                                                                                                                                                                                                                                                                                 |
| 7a. If yes,                                               | <input type="checkbox"/> Unilateral<br><input type="checkbox"/> Bilateral                                                                                                                                                                                                                                                                                                                                                                                                                                                                                       |
| 8. Interstitial opacities                                 | <input type="checkbox"/> Yes<br><input type="checkbox"/> No<br><input type="checkbox"/> Not possible to determine based on test                                                                                                                                                                                                                                                                                                                                                                                                                                 |
| 8a. If yes,                                               | <input type="checkbox"/> Unilateral<br><input type="checkbox"/> Bilateral                                                                                                                                                                                                                                                                                                                                                                                                                                                                                       |
| 9. Pleural effusion                                       | <input type="checkbox"/> Yes<br><input type="checkbox"/> No                                                                                                                                                                                                                                                                                                                                                                                                                                                                                                     |

ID Number \_\_\_\_\_  
 v1.0 26Jul2022

Chest XR Page 1 of 2

## IeDEA TB SRN

|                                                                                                   |                                                                                                                                                                                                                                                                                |
|---------------------------------------------------------------------------------------------------|--------------------------------------------------------------------------------------------------------------------------------------------------------------------------------------------------------------------------------------------------------------------------------|
|                                                                                                   | <input type="checkbox"/> Not possible to determine based on test                                                                                                                                                                                                               |
| 10. Calcification                                                                                 | <input type="checkbox"/> Yes<br><input type="checkbox"/> No<br><input type="checkbox"/> Not possible to determine based on test                                                                                                                                                |
| 11. Mediastinal lymphadenopathy/adenopathy                                                        | <input type="checkbox"/> Yes<br><input type="checkbox"/> No<br><input type="checkbox"/> Not possible to determine based on test                                                                                                                                                |
| 12. Enlarged Cardiac Silhouette (>50% of thoracic diameter)                                       | <input type="checkbox"/> Yes<br><input type="checkbox"/> No<br><input type="checkbox"/> Not possible to determine based on test                                                                                                                                                |
| 13. Nodules or Masses                                                                             | <input type="checkbox"/> Yes<br><input type="checkbox"/> No<br><input type="checkbox"/> Not possible to determine based on test                                                                                                                                                |
| 13a. If yes,                                                                                      | <input type="checkbox"/> Single<br><input type="checkbox"/> Multiple                                                                                                                                                                                                           |
| 13b. If yes, size of largest lesion                                                               | <input type="checkbox"/> < 1 cm <input type="checkbox"/> 1-5 cm <input type="checkbox"/> >5 cm                                                                                                                                                                                 |
| 14. Percentage of lung fields affected by any kind of lesion (alveolar or interstitial opacities) | _____%                                                                                                                                                                                                                                                                         |
| 15. Are any of these other findings seen based on chest x-ray?                                    | <input type="checkbox"/> Bronchiectasis<br><input type="checkbox"/> Emphysema<br><input type="checkbox"/> Lung fibrosis<br><input type="checkbox"/> Signs of pulmonary hypertension<br><input type="checkbox"/> Signs of right heart failure<br><input type="checkbox"/> Other |
| 16. Evolution since last CXR (if applicable)                                                      | <input type="checkbox"/> Worsened<br><input type="checkbox"/> Unchanged<br><input type="checkbox"/> Improved<br><input type="checkbox"/> Complete resolution of lesions                                                                                                        |
| <b>Image Files</b>                                                                                |                                                                                                                                                                                                                                                                                |
| 17. Number of x-ray films                                                                         | ____                                                                                                                                                                                                                                                                           |
| 18. Original x-ray format                                                                         | <input type="checkbox"/> Digital (DICOM)<br><input type="checkbox"/> Film<br><input type="checkbox"/> Unknown                                                                                                                                                                  |
| 19. X-ray digitization date                                                                       | ____/____/____                                                                                                                                                                                                                                                                 |
| 20. Image upload status                                                                           | <input type="checkbox"/> Complete<br><input type="checkbox"/> Incomplete/partial                                                                                                                                                                                               |

Investigator: \_\_\_\_\_ Signature: \_\_\_\_\_ Date \_\_\_\_/\_\_\_\_/\_\_\_\_

ID Number \_\_\_\_\_  
v1.0 26Jul2022

Chest XR Page 2 of 2

## leDEA TB SRN

| [19] TB Treatment<br>(REDCap Flowchart Form)            |                                                                                                                                                                                                                                                                                                                                                                                                                                                                                                                                                                                                                                                                                                                                                                                                                                                                                                                                                                                |                                    |                          |
|---------------------------------------------------------|--------------------------------------------------------------------------------------------------------------------------------------------------------------------------------------------------------------------------------------------------------------------------------------------------------------------------------------------------------------------------------------------------------------------------------------------------------------------------------------------------------------------------------------------------------------------------------------------------------------------------------------------------------------------------------------------------------------------------------------------------------------------------------------------------------------------------------------------------------------------------------------------------------------------------------------------------------------------------------|------------------------------------|--------------------------|
| leDEA/TB SRN ID                                         |                                                                                                                                                                                                                                                                                                                                                                                                                                                                                                                                                                                                                                                                                                                                                                                                                                                                                                                                                                                |                                    |                          |
| <b>Visit</b>                                            | <b>Date (dd/mm/yyyy)</b>                                                                                                                                                                                                                                                                                                                                                                                                                                                                                                                                                                                                                                                                                                                                                                                                                                                                                                                                                       | <b>Visit</b>                       | <b>Date (dd/mm/yyyy)</b> |
| <input type="checkbox"/> Baseline                       | _ _ / _ _ / _ _ _ _                                                                                                                                                                                                                                                                                                                                                                                                                                                                                                                                                                                                                                                                                                                                                                                                                                                                                                                                                            | <input type="checkbox"/> End of Tx | _ _ / _ _ / _ _ _ _      |
| <input type="checkbox"/> Month 1                        | _ _ / _ _ / _ _ _ _                                                                                                                                                                                                                                                                                                                                                                                                                                                                                                                                                                                                                                                                                                                                                                                                                                                                                                                                                            | <input type="checkbox"/> Tx F/R/W  | _ _ / _ _ / _ _ _ _      |
| <input type="checkbox"/> Month 2                        | _ _ / _ _ / _ _ _ _                                                                                                                                                                                                                                                                                                                                                                                                                                                                                                                                                                                                                                                                                                                                                                                                                                                                                                                                                            |                                    |                          |
| <b>TB Drug 1</b>                                        |                                                                                                                                                                                                                                                                                                                                                                                                                                                                                                                                                                                                                                                                                                                                                                                                                                                                                                                                                                                |                                    |                          |
| 1. TB Drug 1<br>(Select one)                            | <input type="checkbox"/> RHZE<br><input type="checkbox"/> RH<br><input type="checkbox"/> Rifampicin<br><input type="checkbox"/> Pyrazinamide<br><input type="checkbox"/> Isoniazid<br><input type="checkbox"/> Ethambutol<br><input type="checkbox"/> Streptomycin<br><input type="checkbox"/> Rifabutin<br><input type="checkbox"/> Amikacin<br><input type="checkbox"/> Kanamycin<br><input type="checkbox"/> Capreomycin<br><input type="checkbox"/> Ofloxacin <input type="checkbox"/> Levofloxacin<br><input type="checkbox"/> Moxifloxacin<br><input type="checkbox"/> Terizidone<br><input type="checkbox"/> Cycloserine<br><input type="checkbox"/> Ethionamide<br><input type="checkbox"/> Protonamide<br><input type="checkbox"/> Para-aminosalicylic acid (PAS)<br><input type="checkbox"/> Clofazimine<br><input type="checkbox"/> Linezolid<br><input type="checkbox"/> Imipenem<br><input type="checkbox"/> Bedaquiline<br><input type="checkbox"/> Other: _____ |                                    |                          |
| 1a. If RHZE, combination:                               | <input type="checkbox"/> RHZE 150/75/400/275 - 2 tablets<br><input type="checkbox"/> RHZE 150/75/400/275 - 3 tablets<br><input type="checkbox"/> RHZE 150/75/400/275 - 4 tablets<br><input type="checkbox"/> RHZE 150/75/400/275 - 5 tablets                                                                                                                                                                                                                                                                                                                                                                                                                                                                                                                                                                                                                                                                                                                                   |                                    |                          |
| 1b. If RH, combination:                                 | <input type="checkbox"/> RH 150/75 - 2 tablets<br><input type="checkbox"/> RH 150/75 - 3 tablets<br><input type="checkbox"/> RH 150/75 - 4 tablets<br><input type="checkbox"/> RH 150/75 - 5 tablets<br><input type="checkbox"/> RH 300/200 - 1 tablet or capsule<br><input type="checkbox"/> RH 300/200 - 2 tablets or capsules<br><input type="checkbox"/> RH 300/200 - 1 tablet or capsule + RH 150/100 - 1 tablet<br><input type="checkbox"/> RH 300/200 - 2 tablets or capsules + RH 150/100 - 1 tablet                                                                                                                                                                                                                                                                                                                                                                                                                                                                   |                                    |                          |
| 1c. Other drugs - Dose (mg)                             | _ _ _ _                                                                                                                                                                                                                                                                                                                                                                                                                                                                                                                                                                                                                                                                                                                                                                                                                                                                                                                                                                        |                                    |                          |
| 1d. How many times a day is this medication prescribed? | _ _ _                                                                                                                                                                                                                                                                                                                                                                                                                                                                                                                                                                                                                                                                                                                                                                                                                                                                                                                                                                          |                                    |                          |
| 1e. How many days a week is this medication prescribed? | _ _ _                                                                                                                                                                                                                                                                                                                                                                                                                                                                                                                                                                                                                                                                                                                                                                                                                                                                                                                                                                          |                                    |                          |
| 1f. Start Date<br>(dd/mm/yyyy)                          | _ _ / _ _ / _ _ _ _                                                                                                                                                                                                                                                                                                                                                                                                                                                                                                                                                                                                                                                                                                                                                                                                                                                                                                                                                            |                                    |                          |
| 1g. Stop Date                                           |                                                                                                                                                                                                                                                                                                                                                                                                                                                                                                                                                                                                                                                                                                                                                                                                                                                                                                                                                                                |                                    |                          |

## IeDEA TB SRN

|                                                                                                                                                                                                                                                                                                                                                                                                                                                                   |                                                                                                                                                                                                                                                                                                                                                                                                                                                                                                                                                                                                                                                                                                                                                                                                                                                                                                                                                                                                                                                                                                                                                                                                                     |                                                                                                                                                                                                                                                                                                                                                                                                                                                                   |                                                                                                                                                                                                                                                                                                                                                                                                                                                                                                               |
|-------------------------------------------------------------------------------------------------------------------------------------------------------------------------------------------------------------------------------------------------------------------------------------------------------------------------------------------------------------------------------------------------------------------------------------------------------------------|---------------------------------------------------------------------------------------------------------------------------------------------------------------------------------------------------------------------------------------------------------------------------------------------------------------------------------------------------------------------------------------------------------------------------------------------------------------------------------------------------------------------------------------------------------------------------------------------------------------------------------------------------------------------------------------------------------------------------------------------------------------------------------------------------------------------------------------------------------------------------------------------------------------------------------------------------------------------------------------------------------------------------------------------------------------------------------------------------------------------------------------------------------------------------------------------------------------------|-------------------------------------------------------------------------------------------------------------------------------------------------------------------------------------------------------------------------------------------------------------------------------------------------------------------------------------------------------------------------------------------------------------------------------------------------------------------|---------------------------------------------------------------------------------------------------------------------------------------------------------------------------------------------------------------------------------------------------------------------------------------------------------------------------------------------------------------------------------------------------------------------------------------------------------------------------------------------------------------|
| (dd/mm/yyyy)                                                                                                                                                                                                                                                                                                                                                                                                                                                      | _ _ _ / _ _ _ / _ _ _ _ _ _ _ _  <input type="checkbox"/> Treatment Ongoing ( <i>Return to update the status at next visit. Update stop date and reason once medication is stopped.</i> )<br><input type="checkbox"/> Unknown                                                                                                                                                                                                                                                                                                                                                                                                                                                                                                                                                                                                                                                                                                                                                                                                                                                                                                                                                                                       |                                                                                                                                                                                                                                                                                                                                                                                                                                                                   |                                                                                                                                                                                                                                                                                                                                                                                                                                                                                                               |
| 1h. Reason for change, interruption or completion                                                                                                                                                                                                                                                                                                                                                                                                                 | <input type="checkbox"/> Completed intensive phase<br><input type="checkbox"/> Completed continuation phase<br><input type="checkbox"/> TB treatment failure<br><input type="checkbox"/> Drug resistance<br><input type="checkbox"/> Pregnancy<br><input type="checkbox"/> Side effects or toxicity<br><input type="checkbox"/> Incompatibility with ART (antiretroviral treatment)<br><input type="checkbox"/> Drug interaction<br><input type="checkbox"/> Participant stopped taking the meds<br><input type="checkbox"/> Lost to follow up<br><input type="checkbox"/> Dose adjustment (e.g. for weight change)<br><input type="checkbox"/> Death<br><input type="checkbox"/> Other _____<br><input type="checkbox"/> Unknown                                                                                                                                                                                                                                                                                                                                                                                                                                                                                   |                                                                                                                                                                                                                                                                                                                                                                                                                                                                   |                                                                                                                                                                                                                                                                                                                                                                                                                                                                                                               |
| <b>TB Drug 2</b>                                                                                                                                                                                                                                                                                                                                                                                                                                                  |                                                                                                                                                                                                                                                                                                                                                                                                                                                                                                                                                                                                                                                                                                                                                                                                                                                                                                                                                                                                                                                                                                                                                                                                                     |                                                                                                                                                                                                                                                                                                                                                                                                                                                                   |                                                                                                                                                                                                                                                                                                                                                                                                                                                                                                               |
| 2. TB Drug 2<br>(Select one)                                                                                                                                                                                                                                                                                                                                                                                                                                      | <table border="1" style="width: 100%;"> <tr> <td style="width: 50%; vertical-align: top;"> <input type="checkbox"/> RHZE<br/> <input type="checkbox"/> RH<br/> <input type="checkbox"/> Rifampicin<br/> <input type="checkbox"/> Pyrazinamide<br/> <input type="checkbox"/> Isoniazid<br/> <input type="checkbox"/> Ethambutol<br/> <input type="checkbox"/> Streptomycin<br/> <input type="checkbox"/> Rifabutin<br/> <input type="checkbox"/> Amikacin<br/> <input type="checkbox"/> Kanamycin<br/> <input type="checkbox"/> Capreomycin<br/> <input type="checkbox"/> Ofloxacin           </td> <td style="width: 50%; vertical-align: top;"> <input type="checkbox"/> Levofloxacin<br/> <input type="checkbox"/> Moxifloxacin<br/> <input type="checkbox"/> Terizidone<br/> <input type="checkbox"/> Cycloserine<br/> <input type="checkbox"/> Ethionamide<br/> <input type="checkbox"/> Protionamide<br/> <input type="checkbox"/> Para-aminosalicylic acid (PAS)<br/> <input type="checkbox"/> Clofazimine<br/> <input type="checkbox"/> Linezolid<br/> <input type="checkbox"/> Imipenem<br/> <input type="checkbox"/> Bedaquiline<br/> <input type="checkbox"/> Other: _____           </td> </tr> </table> | <input type="checkbox"/> RHZE<br><input type="checkbox"/> RH<br><input type="checkbox"/> Rifampicin<br><input type="checkbox"/> Pyrazinamide<br><input type="checkbox"/> Isoniazid<br><input type="checkbox"/> Ethambutol<br><input type="checkbox"/> Streptomycin<br><input type="checkbox"/> Rifabutin<br><input type="checkbox"/> Amikacin<br><input type="checkbox"/> Kanamycin<br><input type="checkbox"/> Capreomycin<br><input type="checkbox"/> Ofloxacin | <input type="checkbox"/> Levofloxacin<br><input type="checkbox"/> Moxifloxacin<br><input type="checkbox"/> Terizidone<br><input type="checkbox"/> Cycloserine<br><input type="checkbox"/> Ethionamide<br><input type="checkbox"/> Protionamide<br><input type="checkbox"/> Para-aminosalicylic acid (PAS)<br><input type="checkbox"/> Clofazimine<br><input type="checkbox"/> Linezolid<br><input type="checkbox"/> Imipenem<br><input type="checkbox"/> Bedaquiline<br><input type="checkbox"/> Other: _____ |
| <input type="checkbox"/> RHZE<br><input type="checkbox"/> RH<br><input type="checkbox"/> Rifampicin<br><input type="checkbox"/> Pyrazinamide<br><input type="checkbox"/> Isoniazid<br><input type="checkbox"/> Ethambutol<br><input type="checkbox"/> Streptomycin<br><input type="checkbox"/> Rifabutin<br><input type="checkbox"/> Amikacin<br><input type="checkbox"/> Kanamycin<br><input type="checkbox"/> Capreomycin<br><input type="checkbox"/> Ofloxacin | <input type="checkbox"/> Levofloxacin<br><input type="checkbox"/> Moxifloxacin<br><input type="checkbox"/> Terizidone<br><input type="checkbox"/> Cycloserine<br><input type="checkbox"/> Ethionamide<br><input type="checkbox"/> Protionamide<br><input type="checkbox"/> Para-aminosalicylic acid (PAS)<br><input type="checkbox"/> Clofazimine<br><input type="checkbox"/> Linezolid<br><input type="checkbox"/> Imipenem<br><input type="checkbox"/> Bedaquiline<br><input type="checkbox"/> Other: _____                                                                                                                                                                                                                                                                                                                                                                                                                                                                                                                                                                                                                                                                                                       |                                                                                                                                                                                                                                                                                                                                                                                                                                                                   |                                                                                                                                                                                                                                                                                                                                                                                                                                                                                                               |
| 2a. If RHZE, combination:                                                                                                                                                                                                                                                                                                                                                                                                                                         | <input type="checkbox"/> RHZE 150/75/400/275 - 2 tablets<br><input type="checkbox"/> RHZE 150/75/400/275 - 3 tablets<br><input type="checkbox"/> RHZE 150/75/400/275 - 4 tablets<br><input type="checkbox"/> RHZE 150/75/400/275 - 5 tablets                                                                                                                                                                                                                                                                                                                                                                                                                                                                                                                                                                                                                                                                                                                                                                                                                                                                                                                                                                        |                                                                                                                                                                                                                                                                                                                                                                                                                                                                   |                                                                                                                                                                                                                                                                                                                                                                                                                                                                                                               |
| 2b. If RH, combination:                                                                                                                                                                                                                                                                                                                                                                                                                                           | <input type="checkbox"/> RH 150/75 - 2 tablets<br><input type="checkbox"/> RH 150/75 - 3 tablets<br><input type="checkbox"/> RH 150/75 - 4 tablets<br><input type="checkbox"/> RH 150/75 - 5 tablets<br><input type="checkbox"/> RH 300/200 - 1 tablet or capsule<br><input type="checkbox"/> RH 300/200 - 2 tablets or capsules<br><input type="checkbox"/> RH 300/200 - 1 tablet or capsule + RH 150/100 - 1 tablet<br><input type="checkbox"/> RH 300/200 - 2 tablets or capsules + RH 150/100 - 1 tablet                                                                                                                                                                                                                                                                                                                                                                                                                                                                                                                                                                                                                                                                                                        |                                                                                                                                                                                                                                                                                                                                                                                                                                                                   |                                                                                                                                                                                                                                                                                                                                                                                                                                                                                                               |
| 2c. Other drugs - Dose (mg)                                                                                                                                                                                                                                                                                                                                                                                                                                       | _ _ _ _                                                                                                                                                                                                                                                                                                                                                                                                                                                                                                                                                                                                                                                                                                                                                                                                                                                                                                                                                                                                                                                                                                                                                                                                             |                                                                                                                                                                                                                                                                                                                                                                                                                                                                   |                                                                                                                                                                                                                                                                                                                                                                                                                                                                                                               |
| 2d. How many times a day is this medication prescribed?                                                                                                                                                                                                                                                                                                                                                                                                           | _ _ _                                                                                                                                                                                                                                                                                                                                                                                                                                                                                                                                                                                                                                                                                                                                                                                                                                                                                                                                                                                                                                                                                                                                                                                                               |                                                                                                                                                                                                                                                                                                                                                                                                                                                                   |                                                                                                                                                                                                                                                                                                                                                                                                                                                                                                               |

## IeDEA TB SRN

|                                                                                                                                                                                                                                                                                                                                                                                                                                                                   |                                                                                                                                                                                                                                                                                                                                                                                                                                                                                                                                                                                                                                                                                                                                                                                                                                                                                                                                                                                                                                                                                          |                                                                                                                                                                                                                                                                                                                                                                                                                                                                   |                                                                                                                                                                                                                                                                                                                                                                                                                                                                                                               |
|-------------------------------------------------------------------------------------------------------------------------------------------------------------------------------------------------------------------------------------------------------------------------------------------------------------------------------------------------------------------------------------------------------------------------------------------------------------------|------------------------------------------------------------------------------------------------------------------------------------------------------------------------------------------------------------------------------------------------------------------------------------------------------------------------------------------------------------------------------------------------------------------------------------------------------------------------------------------------------------------------------------------------------------------------------------------------------------------------------------------------------------------------------------------------------------------------------------------------------------------------------------------------------------------------------------------------------------------------------------------------------------------------------------------------------------------------------------------------------------------------------------------------------------------------------------------|-------------------------------------------------------------------------------------------------------------------------------------------------------------------------------------------------------------------------------------------------------------------------------------------------------------------------------------------------------------------------------------------------------------------------------------------------------------------|---------------------------------------------------------------------------------------------------------------------------------------------------------------------------------------------------------------------------------------------------------------------------------------------------------------------------------------------------------------------------------------------------------------------------------------------------------------------------------------------------------------|
| 2e. How many days a week is this medication prescribed?                                                                                                                                                                                                                                                                                                                                                                                                           | ____ ____ ____ ____                                                                                                                                                                                                                                                                                                                                                                                                                                                                                                                                                                                                                                                                                                                                                                                                                                                                                                                                                                                                                                                                      |                                                                                                                                                                                                                                                                                                                                                                                                                                                                   |                                                                                                                                                                                                                                                                                                                                                                                                                                                                                                               |
| 2f. Start Date                                                                                                                                                                                                                                                                                                                                                                                                                                                    | ____ ____ / ____ ____ / ____ ____ ____ ____  (dd/mm/yyyy)                                                                                                                                                                                                                                                                                                                                                                                                                                                                                                                                                                                                                                                                                                                                                                                                                                                                                                                                                                                                                                |                                                                                                                                                                                                                                                                                                                                                                                                                                                                   |                                                                                                                                                                                                                                                                                                                                                                                                                                                                                                               |
| 2g. Stop Date                                                                                                                                                                                                                                                                                                                                                                                                                                                     | ____ ____ / ____ ____ / ____ ____ ____ ____  (dd/mm/yyyy)<br><br><input type="checkbox"/> Treatment Ongoing ( <i>Return to update the status at next visit. Update stop date and reason once medication is stopped.</i> )<br><input type="checkbox"/> Unknown                                                                                                                                                                                                                                                                                                                                                                                                                                                                                                                                                                                                                                                                                                                                                                                                                            |                                                                                                                                                                                                                                                                                                                                                                                                                                                                   |                                                                                                                                                                                                                                                                                                                                                                                                                                                                                                               |
| 2h. Reason for change, interruption or completion                                                                                                                                                                                                                                                                                                                                                                                                                 | <input type="checkbox"/> Completed intensive phase<br><input type="checkbox"/> Completed continuation phase<br><input type="checkbox"/> TB treatment failure<br><input type="checkbox"/> Drug resistance<br><input type="checkbox"/> Pregnancy<br><input type="checkbox"/> Side effects or toxicity<br><input type="checkbox"/> Incompatibility with ART (antiretroviral treatment)<br><input type="checkbox"/> Drug interaction<br><input type="checkbox"/> Participant stopped taking the meds<br><input type="checkbox"/> Lost to follow up<br><input type="checkbox"/> Dose adjustment (e.g. for weight change)<br><input type="checkbox"/> Death<br><input type="checkbox"/> Other _____<br><input type="checkbox"/> Unknown                                                                                                                                                                                                                                                                                                                                                        |                                                                                                                                                                                                                                                                                                                                                                                                                                                                   |                                                                                                                                                                                                                                                                                                                                                                                                                                                                                                               |
| <b>TB Drug 3</b>                                                                                                                                                                                                                                                                                                                                                                                                                                                  |                                                                                                                                                                                                                                                                                                                                                                                                                                                                                                                                                                                                                                                                                                                                                                                                                                                                                                                                                                                                                                                                                          |                                                                                                                                                                                                                                                                                                                                                                                                                                                                   |                                                                                                                                                                                                                                                                                                                                                                                                                                                                                                               |
| 3. TB Drug 3<br>(Select one)                                                                                                                                                                                                                                                                                                                                                                                                                                      | <table border="1"> <tr> <td> <input type="checkbox"/> RHZE<br/> <input type="checkbox"/> RH<br/> <input type="checkbox"/> Rifampicin<br/> <input type="checkbox"/> Pyrazinamide<br/> <input type="checkbox"/> Isoniazid<br/> <input type="checkbox"/> Ethambutol<br/> <input type="checkbox"/> Streptomycin<br/> <input type="checkbox"/> Rifabutin<br/> <input type="checkbox"/> Amikacin<br/> <input type="checkbox"/> Kanamycin<br/> <input type="checkbox"/> Capreomycin<br/> <input type="checkbox"/> Ofloxacin </td> <td> <input type="checkbox"/> Levofloxacin<br/> <input type="checkbox"/> Moxifloxacin<br/> <input type="checkbox"/> Terizidone<br/> <input type="checkbox"/> Cycloserine<br/> <input type="checkbox"/> Ethionamide<br/> <input type="checkbox"/> Protionamide<br/> <input type="checkbox"/> Para-aminosalicylic acid (PAS)<br/> <input type="checkbox"/> Clofazimine<br/> <input type="checkbox"/> Linezolid<br/> <input type="checkbox"/> Imipenem<br/> <input type="checkbox"/> Bedaquiline<br/> <input type="checkbox"/> Other: _____ </td> </tr> </table> | <input type="checkbox"/> RHZE<br><input type="checkbox"/> RH<br><input type="checkbox"/> Rifampicin<br><input type="checkbox"/> Pyrazinamide<br><input type="checkbox"/> Isoniazid<br><input type="checkbox"/> Ethambutol<br><input type="checkbox"/> Streptomycin<br><input type="checkbox"/> Rifabutin<br><input type="checkbox"/> Amikacin<br><input type="checkbox"/> Kanamycin<br><input type="checkbox"/> Capreomycin<br><input type="checkbox"/> Ofloxacin | <input type="checkbox"/> Levofloxacin<br><input type="checkbox"/> Moxifloxacin<br><input type="checkbox"/> Terizidone<br><input type="checkbox"/> Cycloserine<br><input type="checkbox"/> Ethionamide<br><input type="checkbox"/> Protionamide<br><input type="checkbox"/> Para-aminosalicylic acid (PAS)<br><input type="checkbox"/> Clofazimine<br><input type="checkbox"/> Linezolid<br><input type="checkbox"/> Imipenem<br><input type="checkbox"/> Bedaquiline<br><input type="checkbox"/> Other: _____ |
| <input type="checkbox"/> RHZE<br><input type="checkbox"/> RH<br><input type="checkbox"/> Rifampicin<br><input type="checkbox"/> Pyrazinamide<br><input type="checkbox"/> Isoniazid<br><input type="checkbox"/> Ethambutol<br><input type="checkbox"/> Streptomycin<br><input type="checkbox"/> Rifabutin<br><input type="checkbox"/> Amikacin<br><input type="checkbox"/> Kanamycin<br><input type="checkbox"/> Capreomycin<br><input type="checkbox"/> Ofloxacin | <input type="checkbox"/> Levofloxacin<br><input type="checkbox"/> Moxifloxacin<br><input type="checkbox"/> Terizidone<br><input type="checkbox"/> Cycloserine<br><input type="checkbox"/> Ethionamide<br><input type="checkbox"/> Protionamide<br><input type="checkbox"/> Para-aminosalicylic acid (PAS)<br><input type="checkbox"/> Clofazimine<br><input type="checkbox"/> Linezolid<br><input type="checkbox"/> Imipenem<br><input type="checkbox"/> Bedaquiline<br><input type="checkbox"/> Other: _____                                                                                                                                                                                                                                                                                                                                                                                                                                                                                                                                                                            |                                                                                                                                                                                                                                                                                                                                                                                                                                                                   |                                                                                                                                                                                                                                                                                                                                                                                                                                                                                                               |
| 3a. If RHZE, combination:                                                                                                                                                                                                                                                                                                                                                                                                                                         | <input type="checkbox"/> RHZE 150/75/400/275 - 2 tablets<br><input type="checkbox"/> RHZE 150/75/400/275 - 3 tablets<br><input type="checkbox"/> RHZE 150/75/400/275 - 4 tablets<br><input type="checkbox"/> RHZE 150/75/400/275 - 5 tablets                                                                                                                                                                                                                                                                                                                                                                                                                                                                                                                                                                                                                                                                                                                                                                                                                                             |                                                                                                                                                                                                                                                                                                                                                                                                                                                                   |                                                                                                                                                                                                                                                                                                                                                                                                                                                                                                               |
| 3b. If RH, combination:                                                                                                                                                                                                                                                                                                                                                                                                                                           | <input type="checkbox"/> RH 150/75 - 2 tablets<br><input type="checkbox"/> RH 150/75 - 3 tablets<br><input type="checkbox"/> RH 150/75 - 4 tablets                                                                                                                                                                                                                                                                                                                                                                                                                                                                                                                                                                                                                                                                                                                                                                                                                                                                                                                                       |                                                                                                                                                                                                                                                                                                                                                                                                                                                                   |                                                                                                                                                                                                                                                                                                                                                                                                                                                                                                               |



## IeDEA TB SRN

|                                                         |                                                                                                                                                                                                                                                                                                                                                                                                                                                                                                                                                                                                                                                                                                                                   |
|---------------------------------------------------------|-----------------------------------------------------------------------------------------------------------------------------------------------------------------------------------------------------------------------------------------------------------------------------------------------------------------------------------------------------------------------------------------------------------------------------------------------------------------------------------------------------------------------------------------------------------------------------------------------------------------------------------------------------------------------------------------------------------------------------------|
|                                                         | <input type="checkbox"/> RH 150/75 - 5 tablets<br><input type="checkbox"/> RH 300/200 - 1 tablet or capsule<br><input type="checkbox"/> RH 300/200 - 2 tablets or capsules<br><input type="checkbox"/> RH 300/200 - 1 tablet or capsule + RH 150/100 - 1 tablet<br><input type="checkbox"/> RH 300/200 - 2 tablets or capsules + RH 150/100 - 1 tablet                                                                                                                                                                                                                                                                                                                                                                            |
| 3c. Other drugs - Dose (mg)                             | _ _ _ _                                                                                                                                                                                                                                                                                                                                                                                                                                                                                                                                                                                                                                                                                                                           |
| 3d. How many times a day is this medication prescribed? | _ _ _                                                                                                                                                                                                                                                                                                                                                                                                                                                                                                                                                                                                                                                                                                                             |
| 3e. How many days a week is this medication prescribed? | _ _ _                                                                                                                                                                                                                                                                                                                                                                                                                                                                                                                                                                                                                                                                                                                             |
| 3f. Start Date                                          | _ _ / _ _ / _ _ _ _  (dd/mm/yyyy)                                                                                                                                                                                                                                                                                                                                                                                                                                                                                                                                                                                                                                                                                                 |
| 3g. Stop Date                                           | _ _ / _ _ / _ _ _ _  (dd/mm/yyyy)<br><input type="checkbox"/> Treatment Ongoing ( <i>Return to update the status at next visit. Update stop date and reason once medication is stopped.</i> )<br><input type="checkbox"/> Unknown                                                                                                                                                                                                                                                                                                                                                                                                                                                                                                 |
| 3h. Reason for change, interruption or completion       | <input type="checkbox"/> Completed intensive phase<br><input type="checkbox"/> Completed continuation phase<br><input type="checkbox"/> TB treatment failure<br><input type="checkbox"/> Drug resistance<br><input type="checkbox"/> Pregnancy<br><input type="checkbox"/> Side effects or toxicity<br><input type="checkbox"/> Incompatibility with ART (antiretroviral treatment)<br><input type="checkbox"/> Drug interaction<br><input type="checkbox"/> Participant stopped taking the meds<br><input type="checkbox"/> Lost to follow up<br><input type="checkbox"/> Dose adjustment (e.g. for weight change)<br><input type="checkbox"/> Death<br><input type="checkbox"/> Other _____<br><input type="checkbox"/> Unknown |
| <b>TB Drug 4</b>                                        |                                                                                                                                                                                                                                                                                                                                                                                                                                                                                                                                                                                                                                                                                                                                   |

## IeDEA TB SRN

|                                                                                                                                                                                                                                                                                                                                                                                                                                                                   |                                                                                                                                                                                                                                                                                                                                                                                                                                                                                                                                                                                                                                                                                                                                                                                                                                                                                                                                                                                                                                                                                                                                                                                                 |                                                                                                                                                                                                                                                                                                                                                                                                                                                                   |                                                                                                                                                                                                                                                                                                                                                                                                                                                                                                               |
|-------------------------------------------------------------------------------------------------------------------------------------------------------------------------------------------------------------------------------------------------------------------------------------------------------------------------------------------------------------------------------------------------------------------------------------------------------------------|-------------------------------------------------------------------------------------------------------------------------------------------------------------------------------------------------------------------------------------------------------------------------------------------------------------------------------------------------------------------------------------------------------------------------------------------------------------------------------------------------------------------------------------------------------------------------------------------------------------------------------------------------------------------------------------------------------------------------------------------------------------------------------------------------------------------------------------------------------------------------------------------------------------------------------------------------------------------------------------------------------------------------------------------------------------------------------------------------------------------------------------------------------------------------------------------------|-------------------------------------------------------------------------------------------------------------------------------------------------------------------------------------------------------------------------------------------------------------------------------------------------------------------------------------------------------------------------------------------------------------------------------------------------------------------|---------------------------------------------------------------------------------------------------------------------------------------------------------------------------------------------------------------------------------------------------------------------------------------------------------------------------------------------------------------------------------------------------------------------------------------------------------------------------------------------------------------|
| 4. TB Drug 4<br>(Select one)                                                                                                                                                                                                                                                                                                                                                                                                                                      | <table border="1" style="width: 100%;"> <tr> <td style="width: 50%; vertical-align: top;"> <input type="checkbox"/> RHZE<br/> <input type="checkbox"/> RH<br/> <input type="checkbox"/> Rifampicin<br/> <input type="checkbox"/> Pyrazinamide<br/> <input type="checkbox"/> Isoniazid<br/> <input type="checkbox"/> Ethambutol<br/> <input type="checkbox"/> Streptomycin<br/> <input type="checkbox"/> Rifabutin<br/> <input type="checkbox"/> Amikacin<br/> <input type="checkbox"/> Kanamycin<br/> <input type="checkbox"/> Capreomycin<br/> <input type="checkbox"/> Ofloxacin </td> <td style="width: 50%; vertical-align: top;"> <input type="checkbox"/> Levofloxacin<br/> <input type="checkbox"/> Moxifloxacin<br/> <input type="checkbox"/> Terizidone<br/> <input type="checkbox"/> Cycloserine<br/> <input type="checkbox"/> Ethionamide<br/> <input type="checkbox"/> Protionamide<br/> <input type="checkbox"/> Para-aminosalicylic acid (PAS)<br/> <input type="checkbox"/> Clofazimine<br/> <input type="checkbox"/> Linezolid<br/> <input type="checkbox"/> Imipenem<br/> <input type="checkbox"/> Bedaquiline<br/> <input type="checkbox"/> Other: _____ </td> </tr> </table> | <input type="checkbox"/> RHZE<br><input type="checkbox"/> RH<br><input type="checkbox"/> Rifampicin<br><input type="checkbox"/> Pyrazinamide<br><input type="checkbox"/> Isoniazid<br><input type="checkbox"/> Ethambutol<br><input type="checkbox"/> Streptomycin<br><input type="checkbox"/> Rifabutin<br><input type="checkbox"/> Amikacin<br><input type="checkbox"/> Kanamycin<br><input type="checkbox"/> Capreomycin<br><input type="checkbox"/> Ofloxacin | <input type="checkbox"/> Levofloxacin<br><input type="checkbox"/> Moxifloxacin<br><input type="checkbox"/> Terizidone<br><input type="checkbox"/> Cycloserine<br><input type="checkbox"/> Ethionamide<br><input type="checkbox"/> Protionamide<br><input type="checkbox"/> Para-aminosalicylic acid (PAS)<br><input type="checkbox"/> Clofazimine<br><input type="checkbox"/> Linezolid<br><input type="checkbox"/> Imipenem<br><input type="checkbox"/> Bedaquiline<br><input type="checkbox"/> Other: _____ |
| <input type="checkbox"/> RHZE<br><input type="checkbox"/> RH<br><input type="checkbox"/> Rifampicin<br><input type="checkbox"/> Pyrazinamide<br><input type="checkbox"/> Isoniazid<br><input type="checkbox"/> Ethambutol<br><input type="checkbox"/> Streptomycin<br><input type="checkbox"/> Rifabutin<br><input type="checkbox"/> Amikacin<br><input type="checkbox"/> Kanamycin<br><input type="checkbox"/> Capreomycin<br><input type="checkbox"/> Ofloxacin | <input type="checkbox"/> Levofloxacin<br><input type="checkbox"/> Moxifloxacin<br><input type="checkbox"/> Terizidone<br><input type="checkbox"/> Cycloserine<br><input type="checkbox"/> Ethionamide<br><input type="checkbox"/> Protionamide<br><input type="checkbox"/> Para-aminosalicylic acid (PAS)<br><input type="checkbox"/> Clofazimine<br><input type="checkbox"/> Linezolid<br><input type="checkbox"/> Imipenem<br><input type="checkbox"/> Bedaquiline<br><input type="checkbox"/> Other: _____                                                                                                                                                                                                                                                                                                                                                                                                                                                                                                                                                                                                                                                                                   |                                                                                                                                                                                                                                                                                                                                                                                                                                                                   |                                                                                                                                                                                                                                                                                                                                                                                                                                                                                                               |
| 4a. If RHZE, combination:                                                                                                                                                                                                                                                                                                                                                                                                                                         | <input type="checkbox"/> RHZE 150/75/400/275 - 2 tablets<br><input type="checkbox"/> RHZE 150/75/400/275 - 3 tablets<br><input type="checkbox"/> RHZE 150/75/400/275 - 4 tablets<br><input type="checkbox"/> RHZE 150/75/400/275 - 5 tablets                                                                                                                                                                                                                                                                                                                                                                                                                                                                                                                                                                                                                                                                                                                                                                                                                                                                                                                                                    |                                                                                                                                                                                                                                                                                                                                                                                                                                                                   |                                                                                                                                                                                                                                                                                                                                                                                                                                                                                                               |
| 4b. If RH, combination:                                                                                                                                                                                                                                                                                                                                                                                                                                           | <input type="checkbox"/> RH 150/75 - 2 tablets<br><input type="checkbox"/> RH 150/75 - 3 tablets<br><input type="checkbox"/> RH 150/75 - 4 tablets<br><input type="checkbox"/> RH 150/75 - 5 tablets<br><input type="checkbox"/> RH 300/200 - 1 tablet or capsule<br><input type="checkbox"/> RH 300/200 - 2 tablets or capsules<br><input type="checkbox"/> RH 300/200 - 1 tablet or capsule + RH 150/100 - 1 tablet<br><input type="checkbox"/> RH 300/200 - 2 tablets or capsules + RH 150/100 - 1 tablet                                                                                                                                                                                                                                                                                                                                                                                                                                                                                                                                                                                                                                                                                    |                                                                                                                                                                                                                                                                                                                                                                                                                                                                   |                                                                                                                                                                                                                                                                                                                                                                                                                                                                                                               |
| 4c. Other drugs - Dose (mg)                                                                                                                                                                                                                                                                                                                                                                                                                                       | _ _ _ _                                                                                                                                                                                                                                                                                                                                                                                                                                                                                                                                                                                                                                                                                                                                                                                                                                                                                                                                                                                                                                                                                                                                                                                         |                                                                                                                                                                                                                                                                                                                                                                                                                                                                   |                                                                                                                                                                                                                                                                                                                                                                                                                                                                                                               |
| 4d. How many times a day is this medication prescribed?                                                                                                                                                                                                                                                                                                                                                                                                           | _ _ _                                                                                                                                                                                                                                                                                                                                                                                                                                                                                                                                                                                                                                                                                                                                                                                                                                                                                                                                                                                                                                                                                                                                                                                           |                                                                                                                                                                                                                                                                                                                                                                                                                                                                   |                                                                                                                                                                                                                                                                                                                                                                                                                                                                                                               |
| 4e. How many days a week is this medication prescribed?                                                                                                                                                                                                                                                                                                                                                                                                           | _ _ _                                                                                                                                                                                                                                                                                                                                                                                                                                                                                                                                                                                                                                                                                                                                                                                                                                                                                                                                                                                                                                                                                                                                                                                           |                                                                                                                                                                                                                                                                                                                                                                                                                                                                   |                                                                                                                                                                                                                                                                                                                                                                                                                                                                                                               |
| 4f. Start Date                                                                                                                                                                                                                                                                                                                                                                                                                                                    | _ _ / _ _ / _ _ _ _  (dd/mm/yyyy)                                                                                                                                                                                                                                                                                                                                                                                                                                                                                                                                                                                                                                                                                                                                                                                                                                                                                                                                                                                                                                                                                                                                                               |                                                                                                                                                                                                                                                                                                                                                                                                                                                                   |                                                                                                                                                                                                                                                                                                                                                                                                                                                                                                               |
| 4g. Stop Date                                                                                                                                                                                                                                                                                                                                                                                                                                                     | _ _ / _ _ / _ _ _ _  (dd/mm/yyyy)<br><input type="checkbox"/> Treatment Ongoing (Return to update the status at next visit. Update stop date and reason once medication is stopped.)<br><input type="checkbox"/> Unknown                                                                                                                                                                                                                                                                                                                                                                                                                                                                                                                                                                                                                                                                                                                                                                                                                                                                                                                                                                        |                                                                                                                                                                                                                                                                                                                                                                                                                                                                   |                                                                                                                                                                                                                                                                                                                                                                                                                                                                                                               |
| 4h. Reason for change, interruption or completion                                                                                                                                                                                                                                                                                                                                                                                                                 | <input type="checkbox"/> Completed intensive phase<br><input type="checkbox"/> Completed continuation phase<br><input type="checkbox"/> TB treatment failure<br><input type="checkbox"/> Drug resistance<br><input type="checkbox"/> Pregnancy<br><input type="checkbox"/> Side effects or toxicity                                                                                                                                                                                                                                                                                                                                                                                                                                                                                                                                                                                                                                                                                                                                                                                                                                                                                             |                                                                                                                                                                                                                                                                                                                                                                                                                                                                   |                                                                                                                                                                                                                                                                                                                                                                                                                                                                                                               |

## IeDEA TB SRN

|                                                                                                                                                                                                                                                                                                                                                                                                                                                                   |                                                                                                                                                                                                                                                                                                                                                                                                                                                                                                                                                                                                                                                                                                                                                                                                                                                                                                                                                                                                                                                                                          |                                                                                                                                                                                                                                                                                                                                                                                                                                                                   |                                                                                                                                                                                                                                                                                                                                                                                                                                                                                                               |
|-------------------------------------------------------------------------------------------------------------------------------------------------------------------------------------------------------------------------------------------------------------------------------------------------------------------------------------------------------------------------------------------------------------------------------------------------------------------|------------------------------------------------------------------------------------------------------------------------------------------------------------------------------------------------------------------------------------------------------------------------------------------------------------------------------------------------------------------------------------------------------------------------------------------------------------------------------------------------------------------------------------------------------------------------------------------------------------------------------------------------------------------------------------------------------------------------------------------------------------------------------------------------------------------------------------------------------------------------------------------------------------------------------------------------------------------------------------------------------------------------------------------------------------------------------------------|-------------------------------------------------------------------------------------------------------------------------------------------------------------------------------------------------------------------------------------------------------------------------------------------------------------------------------------------------------------------------------------------------------------------------------------------------------------------|---------------------------------------------------------------------------------------------------------------------------------------------------------------------------------------------------------------------------------------------------------------------------------------------------------------------------------------------------------------------------------------------------------------------------------------------------------------------------------------------------------------|
|                                                                                                                                                                                                                                                                                                                                                                                                                                                                   | <input type="checkbox"/> Incompatibility with ART (antiretroviral treatment)<br><input type="checkbox"/> Drug interaction<br><input type="checkbox"/> Participant stopped taking the meds<br><input type="checkbox"/> Lost to follow up<br><input type="checkbox"/> Dose adjustment (e.g. for weight change)<br><input type="checkbox"/> Death<br><input type="checkbox"/> Other _____<br><input type="checkbox"/> Unknown                                                                                                                                                                                                                                                                                                                                                                                                                                                                                                                                                                                                                                                               |                                                                                                                                                                                                                                                                                                                                                                                                                                                                   |                                                                                                                                                                                                                                                                                                                                                                                                                                                                                                               |
| <b>TB Drug 5</b>                                                                                                                                                                                                                                                                                                                                                                                                                                                  |                                                                                                                                                                                                                                                                                                                                                                                                                                                                                                                                                                                                                                                                                                                                                                                                                                                                                                                                                                                                                                                                                          |                                                                                                                                                                                                                                                                                                                                                                                                                                                                   |                                                                                                                                                                                                                                                                                                                                                                                                                                                                                                               |
| 5. TB Drug 5<br>(Select one)                                                                                                                                                                                                                                                                                                                                                                                                                                      | <table border="1"> <tr> <td> <input type="checkbox"/> RHZE<br/> <input type="checkbox"/> RH<br/> <input type="checkbox"/> Rifampicin<br/> <input type="checkbox"/> Pyrazinamide<br/> <input type="checkbox"/> Isoniazid<br/> <input type="checkbox"/> Ethambutol<br/> <input type="checkbox"/> Streptomycin<br/> <input type="checkbox"/> Rifabutin<br/> <input type="checkbox"/> Amikacin<br/> <input type="checkbox"/> Kanamycin<br/> <input type="checkbox"/> Capreomycin<br/> <input type="checkbox"/> Ofloxacin </td> <td> <input type="checkbox"/> Levofloxacin<br/> <input type="checkbox"/> Moxifloxacin<br/> <input type="checkbox"/> Terizidone<br/> <input type="checkbox"/> Cycloserine<br/> <input type="checkbox"/> Ethionamide<br/> <input type="checkbox"/> Protionamide<br/> <input type="checkbox"/> Para-aminosalicylic acid (PAS)<br/> <input type="checkbox"/> Clofazimine<br/> <input type="checkbox"/> Linezolid<br/> <input type="checkbox"/> Imipenem<br/> <input type="checkbox"/> Bedaquiline<br/> <input type="checkbox"/> Other: _____ </td> </tr> </table> | <input type="checkbox"/> RHZE<br><input type="checkbox"/> RH<br><input type="checkbox"/> Rifampicin<br><input type="checkbox"/> Pyrazinamide<br><input type="checkbox"/> Isoniazid<br><input type="checkbox"/> Ethambutol<br><input type="checkbox"/> Streptomycin<br><input type="checkbox"/> Rifabutin<br><input type="checkbox"/> Amikacin<br><input type="checkbox"/> Kanamycin<br><input type="checkbox"/> Capreomycin<br><input type="checkbox"/> Ofloxacin | <input type="checkbox"/> Levofloxacin<br><input type="checkbox"/> Moxifloxacin<br><input type="checkbox"/> Terizidone<br><input type="checkbox"/> Cycloserine<br><input type="checkbox"/> Ethionamide<br><input type="checkbox"/> Protionamide<br><input type="checkbox"/> Para-aminosalicylic acid (PAS)<br><input type="checkbox"/> Clofazimine<br><input type="checkbox"/> Linezolid<br><input type="checkbox"/> Imipenem<br><input type="checkbox"/> Bedaquiline<br><input type="checkbox"/> Other: _____ |
| <input type="checkbox"/> RHZE<br><input type="checkbox"/> RH<br><input type="checkbox"/> Rifampicin<br><input type="checkbox"/> Pyrazinamide<br><input type="checkbox"/> Isoniazid<br><input type="checkbox"/> Ethambutol<br><input type="checkbox"/> Streptomycin<br><input type="checkbox"/> Rifabutin<br><input type="checkbox"/> Amikacin<br><input type="checkbox"/> Kanamycin<br><input type="checkbox"/> Capreomycin<br><input type="checkbox"/> Ofloxacin | <input type="checkbox"/> Levofloxacin<br><input type="checkbox"/> Moxifloxacin<br><input type="checkbox"/> Terizidone<br><input type="checkbox"/> Cycloserine<br><input type="checkbox"/> Ethionamide<br><input type="checkbox"/> Protionamide<br><input type="checkbox"/> Para-aminosalicylic acid (PAS)<br><input type="checkbox"/> Clofazimine<br><input type="checkbox"/> Linezolid<br><input type="checkbox"/> Imipenem<br><input type="checkbox"/> Bedaquiline<br><input type="checkbox"/> Other: _____                                                                                                                                                                                                                                                                                                                                                                                                                                                                                                                                                                            |                                                                                                                                                                                                                                                                                                                                                                                                                                                                   |                                                                                                                                                                                                                                                                                                                                                                                                                                                                                                               |
| 5a. If RHZE, combination:                                                                                                                                                                                                                                                                                                                                                                                                                                         | <input type="checkbox"/> RHZE 150/75/400/275 - 2 tablets<br><input type="checkbox"/> RHZE 150/75/400/275 - 3 tablets<br><input type="checkbox"/> RHZE 150/75/400/275 - 4 tablets<br><input type="checkbox"/> RHZE 150/75/400/275 - 5 tablets                                                                                                                                                                                                                                                                                                                                                                                                                                                                                                                                                                                                                                                                                                                                                                                                                                             |                                                                                                                                                                                                                                                                                                                                                                                                                                                                   |                                                                                                                                                                                                                                                                                                                                                                                                                                                                                                               |
| 5b. If RH, combination:                                                                                                                                                                                                                                                                                                                                                                                                                                           | <input type="checkbox"/> RH 150/75 - 2 tablets<br><input type="checkbox"/> RH 150/75 - 3 tablets<br><input type="checkbox"/> RH 150/75 - 4 tablets<br><input type="checkbox"/> RH 150/75 - 5 tablets<br><input type="checkbox"/> RH 300/200 - 1 tablet or capsule<br><input type="checkbox"/> RH 300/200 - 2 tablets or capsules<br><input type="checkbox"/> RH 300/200 - 1 tablet or capsule + RH 150/100 - 1 tablet<br><input type="checkbox"/> RH 300/200 - 2 tablets or capsules + RH 150/100 - 1 tablet                                                                                                                                                                                                                                                                                                                                                                                                                                                                                                                                                                             |                                                                                                                                                                                                                                                                                                                                                                                                                                                                   |                                                                                                                                                                                                                                                                                                                                                                                                                                                                                                               |
| 5c. Other drugs - Dose (mg)                                                                                                                                                                                                                                                                                                                                                                                                                                       | _ _ _ _                                                                                                                                                                                                                                                                                                                                                                                                                                                                                                                                                                                                                                                                                                                                                                                                                                                                                                                                                                                                                                                                                  |                                                                                                                                                                                                                                                                                                                                                                                                                                                                   |                                                                                                                                                                                                                                                                                                                                                                                                                                                                                                               |
| 5d. How many times a day is this medication prescribed?                                                                                                                                                                                                                                                                                                                                                                                                           | _ _ _                                                                                                                                                                                                                                                                                                                                                                                                                                                                                                                                                                                                                                                                                                                                                                                                                                                                                                                                                                                                                                                                                    |                                                                                                                                                                                                                                                                                                                                                                                                                                                                   |                                                                                                                                                                                                                                                                                                                                                                                                                                                                                                               |
| 5e. How many days a week is this medication prescribed?                                                                                                                                                                                                                                                                                                                                                                                                           | _ _ _                                                                                                                                                                                                                                                                                                                                                                                                                                                                                                                                                                                                                                                                                                                                                                                                                                                                                                                                                                                                                                                                                    |                                                                                                                                                                                                                                                                                                                                                                                                                                                                   |                                                                                                                                                                                                                                                                                                                                                                                                                                                                                                               |
| 5f. Start Date                                                                                                                                                                                                                                                                                                                                                                                                                                                    | _ _ / _ _ / _ _ _ _  (dd/mm/yyyy)                                                                                                                                                                                                                                                                                                                                                                                                                                                                                                                                                                                                                                                                                                                                                                                                                                                                                                                                                                                                                                                        |                                                                                                                                                                                                                                                                                                                                                                                                                                                                   |                                                                                                                                                                                                                                                                                                                                                                                                                                                                                                               |
| 5g. Stop Date                                                                                                                                                                                                                                                                                                                                                                                                                                                     | _ _ / _ _ / _ _ _ _  (dd/mm/yyyy)<br><input type="checkbox"/> Treatment Ongoing (Return to update the status at next visit. Update stop date and reason once medication is stopped.)<br><input type="checkbox"/> Unknown                                                                                                                                                                                                                                                                                                                                                                                                                                                                                                                                                                                                                                                                                                                                                                                                                                                                 |                                                                                                                                                                                                                                                                                                                                                                                                                                                                   |                                                                                                                                                                                                                                                                                                                                                                                                                                                                                                               |

## IeDEA TB SRN

|                                                                                                                                                                                                                                                                                                                                                                                                                                                                   |                                                                                                                                                                                                                                                                                                                                                                                                                                                                                                                                                                                                                                                                                                                                                                                                                                                                                                                                                                                                                                                                                                                                                                                                 |                                                                                                                                                                                                                                                                                                                                                                                                                                                                   |                                                                                                                                                                                                                                                                                                                                                                                                                                                                                                               |
|-------------------------------------------------------------------------------------------------------------------------------------------------------------------------------------------------------------------------------------------------------------------------------------------------------------------------------------------------------------------------------------------------------------------------------------------------------------------|-------------------------------------------------------------------------------------------------------------------------------------------------------------------------------------------------------------------------------------------------------------------------------------------------------------------------------------------------------------------------------------------------------------------------------------------------------------------------------------------------------------------------------------------------------------------------------------------------------------------------------------------------------------------------------------------------------------------------------------------------------------------------------------------------------------------------------------------------------------------------------------------------------------------------------------------------------------------------------------------------------------------------------------------------------------------------------------------------------------------------------------------------------------------------------------------------|-------------------------------------------------------------------------------------------------------------------------------------------------------------------------------------------------------------------------------------------------------------------------------------------------------------------------------------------------------------------------------------------------------------------------------------------------------------------|---------------------------------------------------------------------------------------------------------------------------------------------------------------------------------------------------------------------------------------------------------------------------------------------------------------------------------------------------------------------------------------------------------------------------------------------------------------------------------------------------------------|
| 5h. Reason for change, interruption or completion                                                                                                                                                                                                                                                                                                                                                                                                                 | <input type="checkbox"/> Completed intensive phase<br><input type="checkbox"/> Completed continuation phase<br><input type="checkbox"/> TB treatment failure<br><input type="checkbox"/> Drug resistance<br><input type="checkbox"/> Pregnancy<br><input type="checkbox"/> Side effects or toxicity<br><input type="checkbox"/> Incompatibility with ART (antiretroviral treatment)<br><input type="checkbox"/> Drug interaction<br><input type="checkbox"/> Participant stopped taking the meds<br><input type="checkbox"/> Lost to follow up<br><input type="checkbox"/> Dose adjustment (e.g. for weight change)<br><input type="checkbox"/> Death<br><input type="checkbox"/> Other _____<br><input type="checkbox"/> Unknown                                                                                                                                                                                                                                                                                                                                                                                                                                                               |                                                                                                                                                                                                                                                                                                                                                                                                                                                                   |                                                                                                                                                                                                                                                                                                                                                                                                                                                                                                               |
| <b>TB Drug 6</b>                                                                                                                                                                                                                                                                                                                                                                                                                                                  |                                                                                                                                                                                                                                                                                                                                                                                                                                                                                                                                                                                                                                                                                                                                                                                                                                                                                                                                                                                                                                                                                                                                                                                                 |                                                                                                                                                                                                                                                                                                                                                                                                                                                                   |                                                                                                                                                                                                                                                                                                                                                                                                                                                                                                               |
| 6. TB Drug 6<br>(Select one)                                                                                                                                                                                                                                                                                                                                                                                                                                      | <table border="1" style="width: 100%;"> <tr> <td style="width: 50%; vertical-align: top;"> <input type="checkbox"/> RHZE<br/> <input type="checkbox"/> RH<br/> <input type="checkbox"/> Rifampicin<br/> <input type="checkbox"/> Pyrazinamide<br/> <input type="checkbox"/> Isoniazid<br/> <input type="checkbox"/> Ethambutol<br/> <input type="checkbox"/> Streptomycin<br/> <input type="checkbox"/> Rifabutin<br/> <input type="checkbox"/> Amikacin<br/> <input type="checkbox"/> Kanamycin<br/> <input type="checkbox"/> Capreomycin<br/> <input type="checkbox"/> Ofloxacin </td> <td style="width: 50%; vertical-align: top;"> <input type="checkbox"/> Levofloxacin<br/> <input type="checkbox"/> Moxifloxacin<br/> <input type="checkbox"/> Terizidone<br/> <input type="checkbox"/> Cycloserine<br/> <input type="checkbox"/> Ethionamide<br/> <input type="checkbox"/> Protionamide<br/> <input type="checkbox"/> Para-aminosalicylic acid (PAS)<br/> <input type="checkbox"/> Clofazimine<br/> <input type="checkbox"/> Linezolid<br/> <input type="checkbox"/> Imipenem<br/> <input type="checkbox"/> Bedaquiline<br/> <input type="checkbox"/> Other: _____ </td> </tr> </table> | <input type="checkbox"/> RHZE<br><input type="checkbox"/> RH<br><input type="checkbox"/> Rifampicin<br><input type="checkbox"/> Pyrazinamide<br><input type="checkbox"/> Isoniazid<br><input type="checkbox"/> Ethambutol<br><input type="checkbox"/> Streptomycin<br><input type="checkbox"/> Rifabutin<br><input type="checkbox"/> Amikacin<br><input type="checkbox"/> Kanamycin<br><input type="checkbox"/> Capreomycin<br><input type="checkbox"/> Ofloxacin | <input type="checkbox"/> Levofloxacin<br><input type="checkbox"/> Moxifloxacin<br><input type="checkbox"/> Terizidone<br><input type="checkbox"/> Cycloserine<br><input type="checkbox"/> Ethionamide<br><input type="checkbox"/> Protionamide<br><input type="checkbox"/> Para-aminosalicylic acid (PAS)<br><input type="checkbox"/> Clofazimine<br><input type="checkbox"/> Linezolid<br><input type="checkbox"/> Imipenem<br><input type="checkbox"/> Bedaquiline<br><input type="checkbox"/> Other: _____ |
| <input type="checkbox"/> RHZE<br><input type="checkbox"/> RH<br><input type="checkbox"/> Rifampicin<br><input type="checkbox"/> Pyrazinamide<br><input type="checkbox"/> Isoniazid<br><input type="checkbox"/> Ethambutol<br><input type="checkbox"/> Streptomycin<br><input type="checkbox"/> Rifabutin<br><input type="checkbox"/> Amikacin<br><input type="checkbox"/> Kanamycin<br><input type="checkbox"/> Capreomycin<br><input type="checkbox"/> Ofloxacin | <input type="checkbox"/> Levofloxacin<br><input type="checkbox"/> Moxifloxacin<br><input type="checkbox"/> Terizidone<br><input type="checkbox"/> Cycloserine<br><input type="checkbox"/> Ethionamide<br><input type="checkbox"/> Protionamide<br><input type="checkbox"/> Para-aminosalicylic acid (PAS)<br><input type="checkbox"/> Clofazimine<br><input type="checkbox"/> Linezolid<br><input type="checkbox"/> Imipenem<br><input type="checkbox"/> Bedaquiline<br><input type="checkbox"/> Other: _____                                                                                                                                                                                                                                                                                                                                                                                                                                                                                                                                                                                                                                                                                   |                                                                                                                                                                                                                                                                                                                                                                                                                                                                   |                                                                                                                                                                                                                                                                                                                                                                                                                                                                                                               |
| 6a. If RHZE, combination:                                                                                                                                                                                                                                                                                                                                                                                                                                         | <input type="checkbox"/> RHZE 150/75/400/275 - 2 tablets<br><input type="checkbox"/> RHZE 150/75/400/275 - 3 tablets<br><input type="checkbox"/> RHZE 150/75/400/275 - 4 tablets<br><input type="checkbox"/> RHZE 150/75/400/275 - 5 tablets                                                                                                                                                                                                                                                                                                                                                                                                                                                                                                                                                                                                                                                                                                                                                                                                                                                                                                                                                    |                                                                                                                                                                                                                                                                                                                                                                                                                                                                   |                                                                                                                                                                                                                                                                                                                                                                                                                                                                                                               |
| 6b. If RH, combination:                                                                                                                                                                                                                                                                                                                                                                                                                                           | <input type="checkbox"/> RH 150/75 - 2 tablets<br><input type="checkbox"/> RH 150/75 - 3 tablets<br><input type="checkbox"/> RH 150/75 - 4 tablets<br><input type="checkbox"/> RH 150/75 - 5 tablets<br><input type="checkbox"/> RH 300/200 - 1 tablet or capsule<br><input type="checkbox"/> RH 300/200 - 2 tablets or capsules<br><input type="checkbox"/> RH 300/200 - 1 tablet or capsule + RH 150/100 - 1 tablet<br><input type="checkbox"/> RH 300/200 - 2 tablets or capsules + RH 150/100 - 1 tablet                                                                                                                                                                                                                                                                                                                                                                                                                                                                                                                                                                                                                                                                                    |                                                                                                                                                                                                                                                                                                                                                                                                                                                                   |                                                                                                                                                                                                                                                                                                                                                                                                                                                                                                               |
| 6c. Other drugs – Dose (mg)                                                                                                                                                                                                                                                                                                                                                                                                                                       | _ _ _ _                                                                                                                                                                                                                                                                                                                                                                                                                                                                                                                                                                                                                                                                                                                                                                                                                                                                                                                                                                                                                                                                                                                                                                                         |                                                                                                                                                                                                                                                                                                                                                                                                                                                                   |                                                                                                                                                                                                                                                                                                                                                                                                                                                                                                               |
| 6d. How many times a day is this medication prescribed?                                                                                                                                                                                                                                                                                                                                                                                                           | _ _ _                                                                                                                                                                                                                                                                                                                                                                                                                                                                                                                                                                                                                                                                                                                                                                                                                                                                                                                                                                                                                                                                                                                                                                                           |                                                                                                                                                                                                                                                                                                                                                                                                                                                                   |                                                                                                                                                                                                                                                                                                                                                                                                                                                                                                               |
| 6e. How many days a week is this medication prescribed?                                                                                                                                                                                                                                                                                                                                                                                                           | _ _ _                                                                                                                                                                                                                                                                                                                                                                                                                                                                                                                                                                                                                                                                                                                                                                                                                                                                                                                                                                                                                                                                                                                                                                                           |                                                                                                                                                                                                                                                                                                                                                                                                                                                                   |                                                                                                                                                                                                                                                                                                                                                                                                                                                                                                               |
| 6f. Start Date                                                                                                                                                                                                                                                                                                                                                                                                                                                    | _ _ / _ _ / _ _ _ _  (dd/mm/yyyy)                                                                                                                                                                                                                                                                                                                                                                                                                                                                                                                                                                                                                                                                                                                                                                                                                                                                                                                                                                                                                                                                                                                                                               |                                                                                                                                                                                                                                                                                                                                                                                                                                                                   |                                                                                                                                                                                                                                                                                                                                                                                                                                                                                                               |

## IeDEA TB SRN

|                                                                                                                                                                                                                                                                                                                                                                                                                                                                   |                                                                                                                                                                                                                                                                                                                                                                                                                                                                                                                                                                                                                                                                                                                                                                                                                                                                                                                                                                                                                                                                                                                                                                                                  |                                                                                                                                                                                                                                                                                                                                                                                                                                                                   |                                                                                                                                                                                                                                                                                                                                                                                                                                                                                                                |
|-------------------------------------------------------------------------------------------------------------------------------------------------------------------------------------------------------------------------------------------------------------------------------------------------------------------------------------------------------------------------------------------------------------------------------------------------------------------|--------------------------------------------------------------------------------------------------------------------------------------------------------------------------------------------------------------------------------------------------------------------------------------------------------------------------------------------------------------------------------------------------------------------------------------------------------------------------------------------------------------------------------------------------------------------------------------------------------------------------------------------------------------------------------------------------------------------------------------------------------------------------------------------------------------------------------------------------------------------------------------------------------------------------------------------------------------------------------------------------------------------------------------------------------------------------------------------------------------------------------------------------------------------------------------------------|-------------------------------------------------------------------------------------------------------------------------------------------------------------------------------------------------------------------------------------------------------------------------------------------------------------------------------------------------------------------------------------------------------------------------------------------------------------------|----------------------------------------------------------------------------------------------------------------------------------------------------------------------------------------------------------------------------------------------------------------------------------------------------------------------------------------------------------------------------------------------------------------------------------------------------------------------------------------------------------------|
| 6g. Stop Date                                                                                                                                                                                                                                                                                                                                                                                                                                                     | <p>____/____/____ (dd/mm/yyyy)</p> <p><input type="checkbox"/> Treatment Ongoing (<i>Return to update the status at next visit. Update stop date and reason once medication is stopped.</i>)</p> <p><input type="checkbox"/> Unknown</p>                                                                                                                                                                                                                                                                                                                                                                                                                                                                                                                                                                                                                                                                                                                                                                                                                                                                                                                                                         |                                                                                                                                                                                                                                                                                                                                                                                                                                                                   |                                                                                                                                                                                                                                                                                                                                                                                                                                                                                                                |
| 6h. Reason for change, interruption or completion                                                                                                                                                                                                                                                                                                                                                                                                                 | <p><input type="checkbox"/> Completed intensive phase</p> <p><input type="checkbox"/> Completed continuation phase</p> <p><input type="checkbox"/> TB treatment failure</p> <p><input type="checkbox"/> Drug resistance</p> <p><input type="checkbox"/> Pregnancy</p> <p><input type="checkbox"/> Side effects or toxicity</p> <p><input type="checkbox"/> Incompatibility with ART (antiretroviral treatment)</p> <p><input type="checkbox"/> Drug interaction</p> <p><input type="checkbox"/> Participant stopped taking the meds</p> <p><input type="checkbox"/> Lost to follow up</p> <p><input type="checkbox"/> Dose adjustment (e.g. for weight change)</p> <p><input type="checkbox"/> Death</p> <p><input type="checkbox"/> Other _____</p> <p><input type="checkbox"/> Unknown</p>                                                                                                                                                                                                                                                                                                                                                                                                     |                                                                                                                                                                                                                                                                                                                                                                                                                                                                   |                                                                                                                                                                                                                                                                                                                                                                                                                                                                                                                |
| <b>TB Drug 7</b>                                                                                                                                                                                                                                                                                                                                                                                                                                                  |                                                                                                                                                                                                                                                                                                                                                                                                                                                                                                                                                                                                                                                                                                                                                                                                                                                                                                                                                                                                                                                                                                                                                                                                  |                                                                                                                                                                                                                                                                                                                                                                                                                                                                   |                                                                                                                                                                                                                                                                                                                                                                                                                                                                                                                |
| 7. TB Drug 7<br>(Select one)                                                                                                                                                                                                                                                                                                                                                                                                                                      | <table border="1" style="width: 100%;"> <tr> <td style="width: 50%; vertical-align: top;"> <input type="checkbox"/> RHZE<br/> <input type="checkbox"/> RH<br/> <input type="checkbox"/> Rifampicin<br/> <input type="checkbox"/> Pyrazinamide<br/> <input type="checkbox"/> Isoniazid<br/> <input type="checkbox"/> Ethambutol<br/> <input type="checkbox"/> Streptomycin<br/> <input type="checkbox"/> Rifabutin<br/> <input type="checkbox"/> Amikacin<br/> <input type="checkbox"/> Kanamycin<br/> <input type="checkbox"/> Capreomycin<br/> <input type="checkbox"/> Ofloxacin </td> <td style="width: 50%; vertical-align: top;"> <input type="checkbox"/> Levofloxacin<br/> <input type="checkbox"/> Moxifloxacin<br/> <input type="checkbox"/> Terizidone<br/> <input type="checkbox"/> Cycloserine<br/> <input type="checkbox"/> Ethionamide<br/> <input type="checkbox"/> Prothionamide<br/> <input type="checkbox"/> Para-aminosalicylic acid (PAS)<br/> <input type="checkbox"/> Clofazimine<br/> <input type="checkbox"/> Linezolid<br/> <input type="checkbox"/> Imipenem<br/> <input type="checkbox"/> Bedaquiline<br/> <input type="checkbox"/> Other: _____ </td> </tr> </table> | <input type="checkbox"/> RHZE<br><input type="checkbox"/> RH<br><input type="checkbox"/> Rifampicin<br><input type="checkbox"/> Pyrazinamide<br><input type="checkbox"/> Isoniazid<br><input type="checkbox"/> Ethambutol<br><input type="checkbox"/> Streptomycin<br><input type="checkbox"/> Rifabutin<br><input type="checkbox"/> Amikacin<br><input type="checkbox"/> Kanamycin<br><input type="checkbox"/> Capreomycin<br><input type="checkbox"/> Ofloxacin | <input type="checkbox"/> Levofloxacin<br><input type="checkbox"/> Moxifloxacin<br><input type="checkbox"/> Terizidone<br><input type="checkbox"/> Cycloserine<br><input type="checkbox"/> Ethionamide<br><input type="checkbox"/> Prothionamide<br><input type="checkbox"/> Para-aminosalicylic acid (PAS)<br><input type="checkbox"/> Clofazimine<br><input type="checkbox"/> Linezolid<br><input type="checkbox"/> Imipenem<br><input type="checkbox"/> Bedaquiline<br><input type="checkbox"/> Other: _____ |
| <input type="checkbox"/> RHZE<br><input type="checkbox"/> RH<br><input type="checkbox"/> Rifampicin<br><input type="checkbox"/> Pyrazinamide<br><input type="checkbox"/> Isoniazid<br><input type="checkbox"/> Ethambutol<br><input type="checkbox"/> Streptomycin<br><input type="checkbox"/> Rifabutin<br><input type="checkbox"/> Amikacin<br><input type="checkbox"/> Kanamycin<br><input type="checkbox"/> Capreomycin<br><input type="checkbox"/> Ofloxacin | <input type="checkbox"/> Levofloxacin<br><input type="checkbox"/> Moxifloxacin<br><input type="checkbox"/> Terizidone<br><input type="checkbox"/> Cycloserine<br><input type="checkbox"/> Ethionamide<br><input type="checkbox"/> Prothionamide<br><input type="checkbox"/> Para-aminosalicylic acid (PAS)<br><input type="checkbox"/> Clofazimine<br><input type="checkbox"/> Linezolid<br><input type="checkbox"/> Imipenem<br><input type="checkbox"/> Bedaquiline<br><input type="checkbox"/> Other: _____                                                                                                                                                                                                                                                                                                                                                                                                                                                                                                                                                                                                                                                                                   |                                                                                                                                                                                                                                                                                                                                                                                                                                                                   |                                                                                                                                                                                                                                                                                                                                                                                                                                                                                                                |
| 7a. If RHZE, combination:                                                                                                                                                                                                                                                                                                                                                                                                                                         | <p><input type="checkbox"/> RHZE 150/75/400/275 - 2 tablets</p> <p><input type="checkbox"/> RHZE 150/75/400/275 - 3 tablets</p> <p><input type="checkbox"/> RHZE 150/75/400/275 - 4 tablets</p> <p><input type="checkbox"/> RHZE 150/75/400/275 - 5 tablets</p>                                                                                                                                                                                                                                                                                                                                                                                                                                                                                                                                                                                                                                                                                                                                                                                                                                                                                                                                  |                                                                                                                                                                                                                                                                                                                                                                                                                                                                   |                                                                                                                                                                                                                                                                                                                                                                                                                                                                                                                |
| 7b. If RH, combination:                                                                                                                                                                                                                                                                                                                                                                                                                                           | <p><input type="checkbox"/> RH 150/75 - 2 tablets</p> <p><input type="checkbox"/> RH 150/75 - 3 tablets</p> <p><input type="checkbox"/> RH 150/75 - 4 tablets</p> <p><input type="checkbox"/> RH 150/75 - 5 tablets</p> <p><input type="checkbox"/> RH 300/200 - 1 tablet or capsule</p> <p><input type="checkbox"/> RH 300/200 - 2 tablets or capsules</p> <p><input type="checkbox"/> RH 300/200 - 1 tablet or capsule + RH 150/100 - 1 tablet</p> <p><input type="checkbox"/> RH 300/200 - 2 tablets or capsules + RH 150/100 - 1 tablet</p>                                                                                                                                                                                                                                                                                                                                                                                                                                                                                                                                                                                                                                                  |                                                                                                                                                                                                                                                                                                                                                                                                                                                                   |                                                                                                                                                                                                                                                                                                                                                                                                                                                                                                                |

## IeDEA TB SRN

|                                                                                                                                                                                                                                                                                                                                                                                                                                                                   |                                                                                                                                                                                                                                                                                                                                                                                                                                                                                                                                                                                                                                                                                                                                                                                                                                                                                                                                                                                                                                                                                           |                                                                                                                                                                                                                                                                                                                                                                                                                                                                   |                                                                                                                                                                                                                                                                                                                                                                                                                                                                                                                |
|-------------------------------------------------------------------------------------------------------------------------------------------------------------------------------------------------------------------------------------------------------------------------------------------------------------------------------------------------------------------------------------------------------------------------------------------------------------------|-------------------------------------------------------------------------------------------------------------------------------------------------------------------------------------------------------------------------------------------------------------------------------------------------------------------------------------------------------------------------------------------------------------------------------------------------------------------------------------------------------------------------------------------------------------------------------------------------------------------------------------------------------------------------------------------------------------------------------------------------------------------------------------------------------------------------------------------------------------------------------------------------------------------------------------------------------------------------------------------------------------------------------------------------------------------------------------------|-------------------------------------------------------------------------------------------------------------------------------------------------------------------------------------------------------------------------------------------------------------------------------------------------------------------------------------------------------------------------------------------------------------------------------------------------------------------|----------------------------------------------------------------------------------------------------------------------------------------------------------------------------------------------------------------------------------------------------------------------------------------------------------------------------------------------------------------------------------------------------------------------------------------------------------------------------------------------------------------|
| 7c. Other drugs - Dose (mg)                                                                                                                                                                                                                                                                                                                                                                                                                                       | _ _ _ _                                                                                                                                                                                                                                                                                                                                                                                                                                                                                                                                                                                                                                                                                                                                                                                                                                                                                                                                                                                                                                                                                   |                                                                                                                                                                                                                                                                                                                                                                                                                                                                   |                                                                                                                                                                                                                                                                                                                                                                                                                                                                                                                |
| 7d. How many times a day is this medication prescribed?                                                                                                                                                                                                                                                                                                                                                                                                           | _ _ _                                                                                                                                                                                                                                                                                                                                                                                                                                                                                                                                                                                                                                                                                                                                                                                                                                                                                                                                                                                                                                                                                     |                                                                                                                                                                                                                                                                                                                                                                                                                                                                   |                                                                                                                                                                                                                                                                                                                                                                                                                                                                                                                |
| 7e. How many days a week is this medication prescribed?                                                                                                                                                                                                                                                                                                                                                                                                           | _ _ _                                                                                                                                                                                                                                                                                                                                                                                                                                                                                                                                                                                                                                                                                                                                                                                                                                                                                                                                                                                                                                                                                     |                                                                                                                                                                                                                                                                                                                                                                                                                                                                   |                                                                                                                                                                                                                                                                                                                                                                                                                                                                                                                |
| 7f. Start Date                                                                                                                                                                                                                                                                                                                                                                                                                                                    | _ _ / _ _ / _ _ _ _  (dd/mm/yyyy)                                                                                                                                                                                                                                                                                                                                                                                                                                                                                                                                                                                                                                                                                                                                                                                                                                                                                                                                                                                                                                                         |                                                                                                                                                                                                                                                                                                                                                                                                                                                                   |                                                                                                                                                                                                                                                                                                                                                                                                                                                                                                                |
| 7g. Stop Date                                                                                                                                                                                                                                                                                                                                                                                                                                                     | _ _ / _ _ / _ _ _ _  (dd/mm/yyyy)<br><input type="checkbox"/> Treatment Ongoing ( <i>Return to update the status at next visit. Update stop date and reason once medication is stopped.</i> )<br><input type="checkbox"/> Unknown                                                                                                                                                                                                                                                                                                                                                                                                                                                                                                                                                                                                                                                                                                                                                                                                                                                         |                                                                                                                                                                                                                                                                                                                                                                                                                                                                   |                                                                                                                                                                                                                                                                                                                                                                                                                                                                                                                |
| 7h. Reason for change, interruption or completion                                                                                                                                                                                                                                                                                                                                                                                                                 | <input type="checkbox"/> Completed intensive phase<br><input type="checkbox"/> Completed continuation phase<br><input type="checkbox"/> TB treatment failure<br><input type="checkbox"/> Drug resistance<br><input type="checkbox"/> Pregnancy<br><input type="checkbox"/> Side effects or toxicity<br><input type="checkbox"/> Incompatibility with ART (antiretroviral treatment)<br><input type="checkbox"/> Drug interaction<br><input type="checkbox"/> Participant stopped taking the meds<br><input type="checkbox"/> Lost to follow up<br><input type="checkbox"/> Dose adjustment (e.g. for weight change)<br><input type="checkbox"/> Death<br><input type="checkbox"/> Other _____<br><input type="checkbox"/> Unknown                                                                                                                                                                                                                                                                                                                                                         |                                                                                                                                                                                                                                                                                                                                                                                                                                                                   |                                                                                                                                                                                                                                                                                                                                                                                                                                                                                                                |
| <b>TB Drug 8</b>                                                                                                                                                                                                                                                                                                                                                                                                                                                  |                                                                                                                                                                                                                                                                                                                                                                                                                                                                                                                                                                                                                                                                                                                                                                                                                                                                                                                                                                                                                                                                                           |                                                                                                                                                                                                                                                                                                                                                                                                                                                                   |                                                                                                                                                                                                                                                                                                                                                                                                                                                                                                                |
| 8. TB Drug 8<br>(Select one)                                                                                                                                                                                                                                                                                                                                                                                                                                      | <table border="1"> <tr> <td> <input type="checkbox"/> RHZE<br/> <input type="checkbox"/> RH<br/> <input type="checkbox"/> Rifampicin<br/> <input type="checkbox"/> Pyrazinamide<br/> <input type="checkbox"/> Isoniazid<br/> <input type="checkbox"/> Ethambutol<br/> <input type="checkbox"/> Streptomycin<br/> <input type="checkbox"/> Rifabutin<br/> <input type="checkbox"/> Amikacin<br/> <input type="checkbox"/> Kanamycin<br/> <input type="checkbox"/> Capreomycin<br/> <input type="checkbox"/> Ofloxacin </td> <td> <input type="checkbox"/> Levofloxacin<br/> <input type="checkbox"/> Moxifloxacin<br/> <input type="checkbox"/> Terizidone<br/> <input type="checkbox"/> Cycloserine<br/> <input type="checkbox"/> Ethionamide<br/> <input type="checkbox"/> Prothionamide<br/> <input type="checkbox"/> Para-aminosalicylic acid (PAS)<br/> <input type="checkbox"/> Clofazimine<br/> <input type="checkbox"/> Linezolid<br/> <input type="checkbox"/> Imipenem<br/> <input type="checkbox"/> Bedaquiline<br/> <input type="checkbox"/> Other: _____ </td> </tr> </table> | <input type="checkbox"/> RHZE<br><input type="checkbox"/> RH<br><input type="checkbox"/> Rifampicin<br><input type="checkbox"/> Pyrazinamide<br><input type="checkbox"/> Isoniazid<br><input type="checkbox"/> Ethambutol<br><input type="checkbox"/> Streptomycin<br><input type="checkbox"/> Rifabutin<br><input type="checkbox"/> Amikacin<br><input type="checkbox"/> Kanamycin<br><input type="checkbox"/> Capreomycin<br><input type="checkbox"/> Ofloxacin | <input type="checkbox"/> Levofloxacin<br><input type="checkbox"/> Moxifloxacin<br><input type="checkbox"/> Terizidone<br><input type="checkbox"/> Cycloserine<br><input type="checkbox"/> Ethionamide<br><input type="checkbox"/> Prothionamide<br><input type="checkbox"/> Para-aminosalicylic acid (PAS)<br><input type="checkbox"/> Clofazimine<br><input type="checkbox"/> Linezolid<br><input type="checkbox"/> Imipenem<br><input type="checkbox"/> Bedaquiline<br><input type="checkbox"/> Other: _____ |
| <input type="checkbox"/> RHZE<br><input type="checkbox"/> RH<br><input type="checkbox"/> Rifampicin<br><input type="checkbox"/> Pyrazinamide<br><input type="checkbox"/> Isoniazid<br><input type="checkbox"/> Ethambutol<br><input type="checkbox"/> Streptomycin<br><input type="checkbox"/> Rifabutin<br><input type="checkbox"/> Amikacin<br><input type="checkbox"/> Kanamycin<br><input type="checkbox"/> Capreomycin<br><input type="checkbox"/> Ofloxacin | <input type="checkbox"/> Levofloxacin<br><input type="checkbox"/> Moxifloxacin<br><input type="checkbox"/> Terizidone<br><input type="checkbox"/> Cycloserine<br><input type="checkbox"/> Ethionamide<br><input type="checkbox"/> Prothionamide<br><input type="checkbox"/> Para-aminosalicylic acid (PAS)<br><input type="checkbox"/> Clofazimine<br><input type="checkbox"/> Linezolid<br><input type="checkbox"/> Imipenem<br><input type="checkbox"/> Bedaquiline<br><input type="checkbox"/> Other: _____                                                                                                                                                                                                                                                                                                                                                                                                                                                                                                                                                                            |                                                                                                                                                                                                                                                                                                                                                                                                                                                                   |                                                                                                                                                                                                                                                                                                                                                                                                                                                                                                                |
| 8a. If RHZE, combination:                                                                                                                                                                                                                                                                                                                                                                                                                                         | <input type="checkbox"/> RHZE 150/75/400/275 - 2 tablets<br><input type="checkbox"/> RHZE 150/75/400/275 - 3 tablets<br><input type="checkbox"/> RHZE 150/75/400/275 - 4 tablets<br><input type="checkbox"/> RHZE 150/75/400/275 - 5 tablets                                                                                                                                                                                                                                                                                                                                                                                                                                                                                                                                                                                                                                                                                                                                                                                                                                              |                                                                                                                                                                                                                                                                                                                                                                                                                                                                   |                                                                                                                                                                                                                                                                                                                                                                                                                                                                                                                |
| 8b. If RH, combination:                                                                                                                                                                                                                                                                                                                                                                                                                                           | <input type="checkbox"/> RH 150/75 - 2 tablets<br><input type="checkbox"/> RH 150/75 - 3 tablets                                                                                                                                                                                                                                                                                                                                                                                                                                                                                                                                                                                                                                                                                                                                                                                                                                                                                                                                                                                          |                                                                                                                                                                                                                                                                                                                                                                                                                                                                   |                                                                                                                                                                                                                                                                                                                                                                                                                                                                                                                |

## IeDEA TB SRN

|                                                         |                                                                                                                                                                                                                                                                                                                                                                                                                                                                                                                                                                                                                                                                                                                                   |
|---------------------------------------------------------|-----------------------------------------------------------------------------------------------------------------------------------------------------------------------------------------------------------------------------------------------------------------------------------------------------------------------------------------------------------------------------------------------------------------------------------------------------------------------------------------------------------------------------------------------------------------------------------------------------------------------------------------------------------------------------------------------------------------------------------|
|                                                         | <input type="checkbox"/> RH 150/75 - 4 tablets<br><input type="checkbox"/> RH 150/75 - 5 tablets<br><input type="checkbox"/> RH 300/200 - 1 tablet or capsule<br><input type="checkbox"/> RH 300/200 - 2 tablets or capsules<br><input type="checkbox"/> RH 300/200 - 1 tablet or capsule + RH 150/100 - 1 tablet<br><input type="checkbox"/> RH 300/200 - 2 tablets or capsules + RH 150/100 - 1 tablet                                                                                                                                                                                                                                                                                                                          |
| 8c. Other drugs - Dose (mg)                             | _ _ _ _                                                                                                                                                                                                                                                                                                                                                                                                                                                                                                                                                                                                                                                                                                                           |
| 8d. How many times a day is this medication prescribed? | _ _ _                                                                                                                                                                                                                                                                                                                                                                                                                                                                                                                                                                                                                                                                                                                             |
| 8e. How many days a week is this medication prescribed? | _ _ _                                                                                                                                                                                                                                                                                                                                                                                                                                                                                                                                                                                                                                                                                                                             |
| 8f. Start Date                                          | _ _ / _ _ / _ _ _ _  (dd/mm/yyyy)                                                                                                                                                                                                                                                                                                                                                                                                                                                                                                                                                                                                                                                                                                 |
| 8g. Stop Date                                           | _ _ / _ _ / _ _ _ _  (dd/mm/yyyy)<br><input type="checkbox"/> Treatment Ongoing ( <i>Return to update the status at next visit. Update stop date and reason once medication is stopped.</i> )<br><input type="checkbox"/> Unknown                                                                                                                                                                                                                                                                                                                                                                                                                                                                                                 |
| 8h. Reason for change, interruption or completion       | <input type="checkbox"/> Completed intensive phase<br><input type="checkbox"/> Completed continuation phase<br><input type="checkbox"/> TB treatment failure<br><input type="checkbox"/> Drug resistance<br><input type="checkbox"/> Pregnancy<br><input type="checkbox"/> Side effects or toxicity<br><input type="checkbox"/> Incompatibility with ART (antiretroviral treatment)<br><input type="checkbox"/> Drug interaction<br><input type="checkbox"/> Participant stopped taking the meds<br><input type="checkbox"/> Lost to follow up<br><input type="checkbox"/> Dose adjustment (e.g. for weight change)<br><input type="checkbox"/> Death<br><input type="checkbox"/> Other _____<br><input type="checkbox"/> Unknown |
| <b>TB Drug 9</b>                                        |                                                                                                                                                                                                                                                                                                                                                                                                                                                                                                                                                                                                                                                                                                                                   |

## IeDEA TB SRN

|                                                                                                                                                                                                                                                                                                                                                                                                                                                                   |                                                                                                                                                                                                                                                                                                                                                                                                                                                                                                                                                                                                                                                                                                                                                                                                                                                                                                                                                                                                                                                                                                                                                                                                 |                                                                                                                                                                                                                                                                                                                                                                                                                                                                   |                                                                                                                                                                                                                                                                                                                                                                                                                                                                                                               |
|-------------------------------------------------------------------------------------------------------------------------------------------------------------------------------------------------------------------------------------------------------------------------------------------------------------------------------------------------------------------------------------------------------------------------------------------------------------------|-------------------------------------------------------------------------------------------------------------------------------------------------------------------------------------------------------------------------------------------------------------------------------------------------------------------------------------------------------------------------------------------------------------------------------------------------------------------------------------------------------------------------------------------------------------------------------------------------------------------------------------------------------------------------------------------------------------------------------------------------------------------------------------------------------------------------------------------------------------------------------------------------------------------------------------------------------------------------------------------------------------------------------------------------------------------------------------------------------------------------------------------------------------------------------------------------|-------------------------------------------------------------------------------------------------------------------------------------------------------------------------------------------------------------------------------------------------------------------------------------------------------------------------------------------------------------------------------------------------------------------------------------------------------------------|---------------------------------------------------------------------------------------------------------------------------------------------------------------------------------------------------------------------------------------------------------------------------------------------------------------------------------------------------------------------------------------------------------------------------------------------------------------------------------------------------------------|
| 9. TB Drug 9<br>(Select one)                                                                                                                                                                                                                                                                                                                                                                                                                                      | <table border="1" style="width: 100%;"> <tr> <td style="width: 50%; vertical-align: top;"> <input type="checkbox"/> RHZE<br/> <input type="checkbox"/> RH<br/> <input type="checkbox"/> Rifampicin<br/> <input type="checkbox"/> Pyrazinamide<br/> <input type="checkbox"/> Isoniazid<br/> <input type="checkbox"/> Ethambutol<br/> <input type="checkbox"/> Streptomycin<br/> <input type="checkbox"/> Rifabutin<br/> <input type="checkbox"/> Amikacin<br/> <input type="checkbox"/> Kanamycin<br/> <input type="checkbox"/> Capreomycin<br/> <input type="checkbox"/> Ofloxacin </td> <td style="width: 50%; vertical-align: top;"> <input type="checkbox"/> Levofloxacin<br/> <input type="checkbox"/> Moxifloxacin<br/> <input type="checkbox"/> Terizidone<br/> <input type="checkbox"/> Cycloserine<br/> <input type="checkbox"/> Ethionamide<br/> <input type="checkbox"/> Protionamide<br/> <input type="checkbox"/> Para-aminosalicylic acid (PAS)<br/> <input type="checkbox"/> Clofazimine<br/> <input type="checkbox"/> Linezolid<br/> <input type="checkbox"/> Imipenem<br/> <input type="checkbox"/> Bedaquiline<br/> <input type="checkbox"/> Other: _____ </td> </tr> </table> | <input type="checkbox"/> RHZE<br><input type="checkbox"/> RH<br><input type="checkbox"/> Rifampicin<br><input type="checkbox"/> Pyrazinamide<br><input type="checkbox"/> Isoniazid<br><input type="checkbox"/> Ethambutol<br><input type="checkbox"/> Streptomycin<br><input type="checkbox"/> Rifabutin<br><input type="checkbox"/> Amikacin<br><input type="checkbox"/> Kanamycin<br><input type="checkbox"/> Capreomycin<br><input type="checkbox"/> Ofloxacin | <input type="checkbox"/> Levofloxacin<br><input type="checkbox"/> Moxifloxacin<br><input type="checkbox"/> Terizidone<br><input type="checkbox"/> Cycloserine<br><input type="checkbox"/> Ethionamide<br><input type="checkbox"/> Protionamide<br><input type="checkbox"/> Para-aminosalicylic acid (PAS)<br><input type="checkbox"/> Clofazimine<br><input type="checkbox"/> Linezolid<br><input type="checkbox"/> Imipenem<br><input type="checkbox"/> Bedaquiline<br><input type="checkbox"/> Other: _____ |
| <input type="checkbox"/> RHZE<br><input type="checkbox"/> RH<br><input type="checkbox"/> Rifampicin<br><input type="checkbox"/> Pyrazinamide<br><input type="checkbox"/> Isoniazid<br><input type="checkbox"/> Ethambutol<br><input type="checkbox"/> Streptomycin<br><input type="checkbox"/> Rifabutin<br><input type="checkbox"/> Amikacin<br><input type="checkbox"/> Kanamycin<br><input type="checkbox"/> Capreomycin<br><input type="checkbox"/> Ofloxacin | <input type="checkbox"/> Levofloxacin<br><input type="checkbox"/> Moxifloxacin<br><input type="checkbox"/> Terizidone<br><input type="checkbox"/> Cycloserine<br><input type="checkbox"/> Ethionamide<br><input type="checkbox"/> Protionamide<br><input type="checkbox"/> Para-aminosalicylic acid (PAS)<br><input type="checkbox"/> Clofazimine<br><input type="checkbox"/> Linezolid<br><input type="checkbox"/> Imipenem<br><input type="checkbox"/> Bedaquiline<br><input type="checkbox"/> Other: _____                                                                                                                                                                                                                                                                                                                                                                                                                                                                                                                                                                                                                                                                                   |                                                                                                                                                                                                                                                                                                                                                                                                                                                                   |                                                                                                                                                                                                                                                                                                                                                                                                                                                                                                               |
| 9a. If RHZE, combination:                                                                                                                                                                                                                                                                                                                                                                                                                                         | <input type="checkbox"/> RHZE 150/75/400/275 - 2 tablets<br><input type="checkbox"/> RHZE 150/75/400/275 - 3 tablets<br><input type="checkbox"/> RHZE 150/75/400/275 - 4 tablets<br><input type="checkbox"/> RHZE 150/75/400/275 - 5 tablets                                                                                                                                                                                                                                                                                                                                                                                                                                                                                                                                                                                                                                                                                                                                                                                                                                                                                                                                                    |                                                                                                                                                                                                                                                                                                                                                                                                                                                                   |                                                                                                                                                                                                                                                                                                                                                                                                                                                                                                               |
| 9b. If RH, combination:                                                                                                                                                                                                                                                                                                                                                                                                                                           | <input type="checkbox"/> RH 150/75 - 2 tablets<br><input type="checkbox"/> RH 150/75 - 3 tablets<br><input type="checkbox"/> RH 150/75 - 4 tablets<br><input type="checkbox"/> RH 150/75 - 5 tablets<br><input type="checkbox"/> RH 300/200 - 1 tablet or capsule<br><input type="checkbox"/> RH 300/200 - 2 tablets or capsules<br><input type="checkbox"/> RH 300/200 - 1 tablet or capsule + RH 150/100 - 1 tablet<br><input type="checkbox"/> RH 300/200 - 2 tablets or capsules + RH 150/100 - 1 tablet                                                                                                                                                                                                                                                                                                                                                                                                                                                                                                                                                                                                                                                                                    |                                                                                                                                                                                                                                                                                                                                                                                                                                                                   |                                                                                                                                                                                                                                                                                                                                                                                                                                                                                                               |
| 9c. Other drugs - Dose (mg)                                                                                                                                                                                                                                                                                                                                                                                                                                       | _ _ _ _                                                                                                                                                                                                                                                                                                                                                                                                                                                                                                                                                                                                                                                                                                                                                                                                                                                                                                                                                                                                                                                                                                                                                                                         |                                                                                                                                                                                                                                                                                                                                                                                                                                                                   |                                                                                                                                                                                                                                                                                                                                                                                                                                                                                                               |
| 9d. How many times a day is this medication prescribed?                                                                                                                                                                                                                                                                                                                                                                                                           | _ _ _                                                                                                                                                                                                                                                                                                                                                                                                                                                                                                                                                                                                                                                                                                                                                                                                                                                                                                                                                                                                                                                                                                                                                                                           |                                                                                                                                                                                                                                                                                                                                                                                                                                                                   |                                                                                                                                                                                                                                                                                                                                                                                                                                                                                                               |
| 9e. How many days a week is this medication prescribed?                                                                                                                                                                                                                                                                                                                                                                                                           | _ _ _                                                                                                                                                                                                                                                                                                                                                                                                                                                                                                                                                                                                                                                                                                                                                                                                                                                                                                                                                                                                                                                                                                                                                                                           |                                                                                                                                                                                                                                                                                                                                                                                                                                                                   |                                                                                                                                                                                                                                                                                                                                                                                                                                                                                                               |
| 9f. Start Date                                                                                                                                                                                                                                                                                                                                                                                                                                                    | _ _ / _ _ / _ _ _ _  (dd/mm/yyyy)                                                                                                                                                                                                                                                                                                                                                                                                                                                                                                                                                                                                                                                                                                                                                                                                                                                                                                                                                                                                                                                                                                                                                               |                                                                                                                                                                                                                                                                                                                                                                                                                                                                   |                                                                                                                                                                                                                                                                                                                                                                                                                                                                                                               |
| 9g. Stop Date                                                                                                                                                                                                                                                                                                                                                                                                                                                     | _ _ / _ _ / _ _ _ _  (dd/mm/yyyy)<br><input type="checkbox"/> Treatment Ongoing (Return to update the status at next visit. Update stop date and reason once medication is stopped.)<br><input type="checkbox"/> Unknown                                                                                                                                                                                                                                                                                                                                                                                                                                                                                                                                                                                                                                                                                                                                                                                                                                                                                                                                                                        |                                                                                                                                                                                                                                                                                                                                                                                                                                                                   |                                                                                                                                                                                                                                                                                                                                                                                                                                                                                                               |
| 9h. Reason for change, interruption or completion                                                                                                                                                                                                                                                                                                                                                                                                                 | <input type="checkbox"/> Completed intensive phase<br><input type="checkbox"/> Completed continuation phase<br><input type="checkbox"/> TB treatment failure<br><input type="checkbox"/> Drug resistance<br><input type="checkbox"/> Pregnancy<br><input type="checkbox"/> Side effects or toxicity<br><input type="checkbox"/> Incompatibility with ART (antiretroviral treatment)                                                                                                                                                                                                                                                                                                                                                                                                                                                                                                                                                                                                                                                                                                                                                                                                             |                                                                                                                                                                                                                                                                                                                                                                                                                                                                   |                                                                                                                                                                                                                                                                                                                                                                                                                                                                                                               |



**leDEA TB SRN**

|                                                                                                                                                                                                                                                                                                                                                                                                                                                                   |                                                                                                                                                                                                                                                                                                                                                                                                                                                                                                                                                                                                                                                                                                                                                                                                                                                                                                                                                                                                                                                                                                                                                  |                                                                                                                                                                                                                                                                                                                                                                                                                                                                   |                                                                                                                                                                                                                                                                                                                                                                                                                                                                                                               |
|-------------------------------------------------------------------------------------------------------------------------------------------------------------------------------------------------------------------------------------------------------------------------------------------------------------------------------------------------------------------------------------------------------------------------------------------------------------------|--------------------------------------------------------------------------------------------------------------------------------------------------------------------------------------------------------------------------------------------------------------------------------------------------------------------------------------------------------------------------------------------------------------------------------------------------------------------------------------------------------------------------------------------------------------------------------------------------------------------------------------------------------------------------------------------------------------------------------------------------------------------------------------------------------------------------------------------------------------------------------------------------------------------------------------------------------------------------------------------------------------------------------------------------------------------------------------------------------------------------------------------------|-------------------------------------------------------------------------------------------------------------------------------------------------------------------------------------------------------------------------------------------------------------------------------------------------------------------------------------------------------------------------------------------------------------------------------------------------------------------|---------------------------------------------------------------------------------------------------------------------------------------------------------------------------------------------------------------------------------------------------------------------------------------------------------------------------------------------------------------------------------------------------------------------------------------------------------------------------------------------------------------|
|                                                                                                                                                                                                                                                                                                                                                                                                                                                                   | <input type="checkbox"/> Drug interaction<br><input type="checkbox"/> Participant stopped taking the meds<br><input type="checkbox"/> Lost to follow up<br><input type="checkbox"/> Dose adjustment (e.g. for weight change)<br><input type="checkbox"/> Death<br><input type="checkbox"/> Other _____<br><input type="checkbox"/> Unknown                                                                                                                                                                                                                                                                                                                                                                                                                                                                                                                                                                                                                                                                                                                                                                                                       |                                                                                                                                                                                                                                                                                                                                                                                                                                                                   |                                                                                                                                                                                                                                                                                                                                                                                                                                                                                                               |
| <b>TB Drug 10</b>                                                                                                                                                                                                                                                                                                                                                                                                                                                 |                                                                                                                                                                                                                                                                                                                                                                                                                                                                                                                                                                                                                                                                                                                                                                                                                                                                                                                                                                                                                                                                                                                                                  |                                                                                                                                                                                                                                                                                                                                                                                                                                                                   |                                                                                                                                                                                                                                                                                                                                                                                                                                                                                                               |
| 10. TB Drug 10<br>(Select one)                                                                                                                                                                                                                                                                                                                                                                                                                                    | <table border="1"> <tr> <td> <input type="checkbox"/> RHZE<br/> <input type="checkbox"/> RH<br/> <input type="checkbox"/> Rifampicin<br/> <input type="checkbox"/> Pyrazinamide<br/> <input type="checkbox"/> Isoniazid<br/> <input type="checkbox"/> Ethambutol<br/> <input type="checkbox"/> Streptomycin<br/> <input type="checkbox"/> Rifabutin<br/> <input type="checkbox"/> Amikacin<br/> <input type="checkbox"/> Kanamycin<br/> <input type="checkbox"/> Capreomycin<br/> <input type="checkbox"/> Ofloxacin                             </td> <td> <input type="checkbox"/> Levofloxacin<br/> <input type="checkbox"/> Moxifloxacin<br/> <input type="checkbox"/> Terizidone<br/> <input type="checkbox"/> Cycloserine<br/> <input type="checkbox"/> Ethionamide<br/> <input type="checkbox"/> Protionamide<br/> <input type="checkbox"/> Para-aminosalicylic acid (PAS)<br/> <input type="checkbox"/> Clofazimine<br/> <input type="checkbox"/> Linezolid<br/> <input type="checkbox"/> Imipenem<br/> <input type="checkbox"/> Bedaquiline<br/> <input type="checkbox"/> Other: _____                             </td> </tr> </table> | <input type="checkbox"/> RHZE<br><input type="checkbox"/> RH<br><input type="checkbox"/> Rifampicin<br><input type="checkbox"/> Pyrazinamide<br><input type="checkbox"/> Isoniazid<br><input type="checkbox"/> Ethambutol<br><input type="checkbox"/> Streptomycin<br><input type="checkbox"/> Rifabutin<br><input type="checkbox"/> Amikacin<br><input type="checkbox"/> Kanamycin<br><input type="checkbox"/> Capreomycin<br><input type="checkbox"/> Ofloxacin | <input type="checkbox"/> Levofloxacin<br><input type="checkbox"/> Moxifloxacin<br><input type="checkbox"/> Terizidone<br><input type="checkbox"/> Cycloserine<br><input type="checkbox"/> Ethionamide<br><input type="checkbox"/> Protionamide<br><input type="checkbox"/> Para-aminosalicylic acid (PAS)<br><input type="checkbox"/> Clofazimine<br><input type="checkbox"/> Linezolid<br><input type="checkbox"/> Imipenem<br><input type="checkbox"/> Bedaquiline<br><input type="checkbox"/> Other: _____ |
| <input type="checkbox"/> RHZE<br><input type="checkbox"/> RH<br><input type="checkbox"/> Rifampicin<br><input type="checkbox"/> Pyrazinamide<br><input type="checkbox"/> Isoniazid<br><input type="checkbox"/> Ethambutol<br><input type="checkbox"/> Streptomycin<br><input type="checkbox"/> Rifabutin<br><input type="checkbox"/> Amikacin<br><input type="checkbox"/> Kanamycin<br><input type="checkbox"/> Capreomycin<br><input type="checkbox"/> Ofloxacin | <input type="checkbox"/> Levofloxacin<br><input type="checkbox"/> Moxifloxacin<br><input type="checkbox"/> Terizidone<br><input type="checkbox"/> Cycloserine<br><input type="checkbox"/> Ethionamide<br><input type="checkbox"/> Protionamide<br><input type="checkbox"/> Para-aminosalicylic acid (PAS)<br><input type="checkbox"/> Clofazimine<br><input type="checkbox"/> Linezolid<br><input type="checkbox"/> Imipenem<br><input type="checkbox"/> Bedaquiline<br><input type="checkbox"/> Other: _____                                                                                                                                                                                                                                                                                                                                                                                                                                                                                                                                                                                                                                    |                                                                                                                                                                                                                                                                                                                                                                                                                                                                   |                                                                                                                                                                                                                                                                                                                                                                                                                                                                                                               |
| 10a. If RHZE, combination:                                                                                                                                                                                                                                                                                                                                                                                                                                        | <input type="checkbox"/> RHZE 150/75/400/275 - 2 tablets<br><input type="checkbox"/> RHZE 150/75/400/275 - 3 tablets<br><input type="checkbox"/> RHZE 150/75/400/275 - 4 tablets<br><input type="checkbox"/> RHZE 150/75/400/275 - 5 tablets                                                                                                                                                                                                                                                                                                                                                                                                                                                                                                                                                                                                                                                                                                                                                                                                                                                                                                     |                                                                                                                                                                                                                                                                                                                                                                                                                                                                   |                                                                                                                                                                                                                                                                                                                                                                                                                                                                                                               |
| 10b. If RH, combination:                                                                                                                                                                                                                                                                                                                                                                                                                                          | <input type="checkbox"/> RH 150/75 - 2 tablets<br><input type="checkbox"/> RH 150/75 - 3 tablets<br><input type="checkbox"/> RH 150/75 - 4 tablets<br><input type="checkbox"/> RH 150/75 - 5 tablets<br><input type="checkbox"/> RH 300/200 - 1 tablet or capsule<br><input type="checkbox"/> RH 300/200 - 2 tablets or capsules<br><input type="checkbox"/> RH 300/200 - 1 tablet or capsule + RH 150/100 - 1 tablet<br><input type="checkbox"/> RH 300/200 - 2 tablets or capsules + RH 150/100 - 1 tablet                                                                                                                                                                                                                                                                                                                                                                                                                                                                                                                                                                                                                                     |                                                                                                                                                                                                                                                                                                                                                                                                                                                                   |                                                                                                                                                                                                                                                                                                                                                                                                                                                                                                               |
| 10c. Other drugs - Dose (mg)                                                                                                                                                                                                                                                                                                                                                                                                                                      | _ _ _ _                                                                                                                                                                                                                                                                                                                                                                                                                                                                                                                                                                                                                                                                                                                                                                                                                                                                                                                                                                                                                                                                                                                                          |                                                                                                                                                                                                                                                                                                                                                                                                                                                                   |                                                                                                                                                                                                                                                                                                                                                                                                                                                                                                               |
| 10d. How many times a day is this medication prescribed?                                                                                                                                                                                                                                                                                                                                                                                                          | _ _ _                                                                                                                                                                                                                                                                                                                                                                                                                                                                                                                                                                                                                                                                                                                                                                                                                                                                                                                                                                                                                                                                                                                                            |                                                                                                                                                                                                                                                                                                                                                                                                                                                                   |                                                                                                                                                                                                                                                                                                                                                                                                                                                                                                               |
| 10e. How many days a week is this medication prescribed?                                                                                                                                                                                                                                                                                                                                                                                                          | _ _ _                                                                                                                                                                                                                                                                                                                                                                                                                                                                                                                                                                                                                                                                                                                                                                                                                                                                                                                                                                                                                                                                                                                                            |                                                                                                                                                                                                                                                                                                                                                                                                                                                                   |                                                                                                                                                                                                                                                                                                                                                                                                                                                                                                               |
| 10f. Start Date                                                                                                                                                                                                                                                                                                                                                                                                                                                   | _ _ / _ _ / _ _ _ _  (dd/mm/yyyy)                                                                                                                                                                                                                                                                                                                                                                                                                                                                                                                                                                                                                                                                                                                                                                                                                                                                                                                                                                                                                                                                                                                |                                                                                                                                                                                                                                                                                                                                                                                                                                                                   |                                                                                                                                                                                                                                                                                                                                                                                                                                                                                                               |
| 10g. Stop Date                                                                                                                                                                                                                                                                                                                                                                                                                                                    | _ _ / _ _ / _ _ _ _  (dd/mm/yyyy)                                                                                                                                                                                                                                                                                                                                                                                                                                                                                                                                                                                                                                                                                                                                                                                                                                                                                                                                                                                                                                                                                                                |                                                                                                                                                                                                                                                                                                                                                                                                                                                                   |                                                                                                                                                                                                                                                                                                                                                                                                                                                                                                               |

## IeDEA TB SRN

|                                                                                                                                                                                                                                                                                                                                                                                                                                                                   |                                                                                                                                                                                                                                                                                                                                                                                                                                                                                                                                                                                                                                                                                                                                                                                                                                                                                                                                                                                                                                                                                          |                                                                                                                                                                                                                                                                                                                                                                                                                                                                   |                                                                                                                                                                                                                                                                                                                                                                                                                                                                                                               |
|-------------------------------------------------------------------------------------------------------------------------------------------------------------------------------------------------------------------------------------------------------------------------------------------------------------------------------------------------------------------------------------------------------------------------------------------------------------------|------------------------------------------------------------------------------------------------------------------------------------------------------------------------------------------------------------------------------------------------------------------------------------------------------------------------------------------------------------------------------------------------------------------------------------------------------------------------------------------------------------------------------------------------------------------------------------------------------------------------------------------------------------------------------------------------------------------------------------------------------------------------------------------------------------------------------------------------------------------------------------------------------------------------------------------------------------------------------------------------------------------------------------------------------------------------------------------|-------------------------------------------------------------------------------------------------------------------------------------------------------------------------------------------------------------------------------------------------------------------------------------------------------------------------------------------------------------------------------------------------------------------------------------------------------------------|---------------------------------------------------------------------------------------------------------------------------------------------------------------------------------------------------------------------------------------------------------------------------------------------------------------------------------------------------------------------------------------------------------------------------------------------------------------------------------------------------------------|
|                                                                                                                                                                                                                                                                                                                                                                                                                                                                   | <input type="checkbox"/> Treatment Ongoing ( <i>Return to update the status at next visit. Update stop date and reason once medication is stopped.</i> )<br><input type="checkbox"/> Unknown                                                                                                                                                                                                                                                                                                                                                                                                                                                                                                                                                                                                                                                                                                                                                                                                                                                                                             |                                                                                                                                                                                                                                                                                                                                                                                                                                                                   |                                                                                                                                                                                                                                                                                                                                                                                                                                                                                                               |
| 10h. Reason for change, interruption or completion                                                                                                                                                                                                                                                                                                                                                                                                                | <input type="checkbox"/> Completed intensive phase<br><input type="checkbox"/> Completed continuation phase<br><input type="checkbox"/> TB treatment failure<br><input type="checkbox"/> Drug resistance<br><input type="checkbox"/> Pregnancy<br><input type="checkbox"/> Side effects or toxicity<br><input type="checkbox"/> Incompatibility with ART (antiretroviral treatment)<br><input type="checkbox"/> Drug interaction<br><input type="checkbox"/> Participant stopped taking the meds<br><input type="checkbox"/> Lost to follow up<br><input type="checkbox"/> Dose adjustment (e.g. for weight change)<br><input type="checkbox"/> Death<br><input type="checkbox"/> Other _____<br><input type="checkbox"/> Unknown                                                                                                                                                                                                                                                                                                                                                        |                                                                                                                                                                                                                                                                                                                                                                                                                                                                   |                                                                                                                                                                                                                                                                                                                                                                                                                                                                                                               |
| <b>TB Drug 11</b>                                                                                                                                                                                                                                                                                                                                                                                                                                                 |                                                                                                                                                                                                                                                                                                                                                                                                                                                                                                                                                                                                                                                                                                                                                                                                                                                                                                                                                                                                                                                                                          |                                                                                                                                                                                                                                                                                                                                                                                                                                                                   |                                                                                                                                                                                                                                                                                                                                                                                                                                                                                                               |
| 11. TB Drug 11<br>( <i>Select one</i> )                                                                                                                                                                                                                                                                                                                                                                                                                           | <table border="1"> <tr> <td> <input type="checkbox"/> RHZE<br/> <input type="checkbox"/> RH<br/> <input type="checkbox"/> Rifampicin<br/> <input type="checkbox"/> Pyrazinamide<br/> <input type="checkbox"/> Isoniazid<br/> <input type="checkbox"/> Ethambutol<br/> <input type="checkbox"/> Streptomycin<br/> <input type="checkbox"/> Rifabutin<br/> <input type="checkbox"/> Amikacin<br/> <input type="checkbox"/> Kanamycin<br/> <input type="checkbox"/> Capreomycin<br/> <input type="checkbox"/> Ofloxacin </td> <td> <input type="checkbox"/> Levofloxacin<br/> <input type="checkbox"/> Moxifloxacin<br/> <input type="checkbox"/> Terizidone<br/> <input type="checkbox"/> Cycloserine<br/> <input type="checkbox"/> Ethionamide<br/> <input type="checkbox"/> Protionamide<br/> <input type="checkbox"/> Para-aminosalicylic acid (PAS)<br/> <input type="checkbox"/> Clofazimine<br/> <input type="checkbox"/> Linezolid<br/> <input type="checkbox"/> Imipenem<br/> <input type="checkbox"/> Bedaquiline<br/> <input type="checkbox"/> Other: _____ </td> </tr> </table> | <input type="checkbox"/> RHZE<br><input type="checkbox"/> RH<br><input type="checkbox"/> Rifampicin<br><input type="checkbox"/> Pyrazinamide<br><input type="checkbox"/> Isoniazid<br><input type="checkbox"/> Ethambutol<br><input type="checkbox"/> Streptomycin<br><input type="checkbox"/> Rifabutin<br><input type="checkbox"/> Amikacin<br><input type="checkbox"/> Kanamycin<br><input type="checkbox"/> Capreomycin<br><input type="checkbox"/> Ofloxacin | <input type="checkbox"/> Levofloxacin<br><input type="checkbox"/> Moxifloxacin<br><input type="checkbox"/> Terizidone<br><input type="checkbox"/> Cycloserine<br><input type="checkbox"/> Ethionamide<br><input type="checkbox"/> Protionamide<br><input type="checkbox"/> Para-aminosalicylic acid (PAS)<br><input type="checkbox"/> Clofazimine<br><input type="checkbox"/> Linezolid<br><input type="checkbox"/> Imipenem<br><input type="checkbox"/> Bedaquiline<br><input type="checkbox"/> Other: _____ |
| <input type="checkbox"/> RHZE<br><input type="checkbox"/> RH<br><input type="checkbox"/> Rifampicin<br><input type="checkbox"/> Pyrazinamide<br><input type="checkbox"/> Isoniazid<br><input type="checkbox"/> Ethambutol<br><input type="checkbox"/> Streptomycin<br><input type="checkbox"/> Rifabutin<br><input type="checkbox"/> Amikacin<br><input type="checkbox"/> Kanamycin<br><input type="checkbox"/> Capreomycin<br><input type="checkbox"/> Ofloxacin | <input type="checkbox"/> Levofloxacin<br><input type="checkbox"/> Moxifloxacin<br><input type="checkbox"/> Terizidone<br><input type="checkbox"/> Cycloserine<br><input type="checkbox"/> Ethionamide<br><input type="checkbox"/> Protionamide<br><input type="checkbox"/> Para-aminosalicylic acid (PAS)<br><input type="checkbox"/> Clofazimine<br><input type="checkbox"/> Linezolid<br><input type="checkbox"/> Imipenem<br><input type="checkbox"/> Bedaquiline<br><input type="checkbox"/> Other: _____                                                                                                                                                                                                                                                                                                                                                                                                                                                                                                                                                                            |                                                                                                                                                                                                                                                                                                                                                                                                                                                                   |                                                                                                                                                                                                                                                                                                                                                                                                                                                                                                               |
| 11a. If RHZE, combination:                                                                                                                                                                                                                                                                                                                                                                                                                                        | <input type="checkbox"/> RHZE 150/75/400/275 - 2 tablets<br><input type="checkbox"/> RHZE 150/75/400/275 - 3 tablets<br><input type="checkbox"/> RHZE 150/75/400/275 - 4 tablets<br><input type="checkbox"/> RHZE 150/75/400/275 - 5 tablets                                                                                                                                                                                                                                                                                                                                                                                                                                                                                                                                                                                                                                                                                                                                                                                                                                             |                                                                                                                                                                                                                                                                                                                                                                                                                                                                   |                                                                                                                                                                                                                                                                                                                                                                                                                                                                                                               |
| 11b. If RH, combination:                                                                                                                                                                                                                                                                                                                                                                                                                                          | <input type="checkbox"/> RH 150/75 - 2 tablets<br><input type="checkbox"/> RH 150/75 - 3 tablets<br><input type="checkbox"/> RH 150/75 - 4 tablets<br><input type="checkbox"/> RH 150/75 - 5 tablets<br><input type="checkbox"/> RH 300/200 - 1 tablet or capsule<br><input type="checkbox"/> RH 300/200 - 2 tablets or capsules<br><input type="checkbox"/> RH 300/200 - 1 tablet or capsule + RH 150/100 - 1 tablet<br><input type="checkbox"/> RH 300/200 - 2 tablets or capsules + RH 150/100 - 1 tablet                                                                                                                                                                                                                                                                                                                                                                                                                                                                                                                                                                             |                                                                                                                                                                                                                                                                                                                                                                                                                                                                   |                                                                                                                                                                                                                                                                                                                                                                                                                                                                                                               |
| 11c. Other drugs - Dose (mg)                                                                                                                                                                                                                                                                                                                                                                                                                                      | _ _ _ _                                                                                                                                                                                                                                                                                                                                                                                                                                                                                                                                                                                                                                                                                                                                                                                                                                                                                                                                                                                                                                                                                  |                                                                                                                                                                                                                                                                                                                                                                                                                                                                   |                                                                                                                                                                                                                                                                                                                                                                                                                                                                                                               |
| 11d. How many times a day is this medication prescribed?                                                                                                                                                                                                                                                                                                                                                                                                          | _ _ _                                                                                                                                                                                                                                                                                                                                                                                                                                                                                                                                                                                                                                                                                                                                                                                                                                                                                                                                                                                                                                                                                    |                                                                                                                                                                                                                                                                                                                                                                                                                                                                   |                                                                                                                                                                                                                                                                                                                                                                                                                                                                                                               |
| 11e. How many days a week is this medication prescribed?                                                                                                                                                                                                                                                                                                                                                                                                          | _ _ _                                                                                                                                                                                                                                                                                                                                                                                                                                                                                                                                                                                                                                                                                                                                                                                                                                                                                                                                                                                                                                                                                    |                                                                                                                                                                                                                                                                                                                                                                                                                                                                   |                                                                                                                                                                                                                                                                                                                                                                                                                                                                                                               |

## IeDEA TB SRN

|                                                    |                                                                                                                                                                                                                                                                                                                                                                                                                                                                                                                                                                                                                                                                                                                                                                                                                                                                                                                                                                                                                                                                                                                                                                                                                                                                                                       |  |                               |                                       |                             |                                       |                                     |                                     |                                       |                                      |                                    |                                      |                                     |                                       |                                       |                                                         |                                    |                                      |                                   |                                    |                                    |                                   |                                      |                                      |                                    |                                       |
|----------------------------------------------------|-------------------------------------------------------------------------------------------------------------------------------------------------------------------------------------------------------------------------------------------------------------------------------------------------------------------------------------------------------------------------------------------------------------------------------------------------------------------------------------------------------------------------------------------------------------------------------------------------------------------------------------------------------------------------------------------------------------------------------------------------------------------------------------------------------------------------------------------------------------------------------------------------------------------------------------------------------------------------------------------------------------------------------------------------------------------------------------------------------------------------------------------------------------------------------------------------------------------------------------------------------------------------------------------------------|--|-------------------------------|---------------------------------------|-----------------------------|---------------------------------------|-------------------------------------|-------------------------------------|---------------------------------------|--------------------------------------|------------------------------------|--------------------------------------|-------------------------------------|---------------------------------------|---------------------------------------|---------------------------------------------------------|------------------------------------|--------------------------------------|-----------------------------------|------------------------------------|------------------------------------|-----------------------------------|--------------------------------------|--------------------------------------|------------------------------------|---------------------------------------|
| 11f. Start Date                                    | _ _ _ / _ _ _ / _ _ _ _ _ _  (dd/mm/yyyy)                                                                                                                                                                                                                                                                                                                                                                                                                                                                                                                                                                                                                                                                                                                                                                                                                                                                                                                                                                                                                                                                                                                                                                                                                                                             |  |                               |                                       |                             |                                       |                                     |                                     |                                       |                                      |                                    |                                      |                                     |                                       |                                       |                                                         |                                    |                                      |                                   |                                    |                                    |                                   |                                      |                                      |                                    |                                       |
| 11g. Stop Date                                     | _ _ _ / _ _ _ / _ _ _ _ _ _  (dd/mm/yyyy)<br><input type="checkbox"/> Treatment Ongoing (Return to update the status at next visit. Update stop date and reason once medication is stopped.)<br><input type="checkbox"/> Unknown                                                                                                                                                                                                                                                                                                                                                                                                                                                                                                                                                                                                                                                                                                                                                                                                                                                                                                                                                                                                                                                                      |  |                               |                                       |                             |                                       |                                     |                                     |                                       |                                      |                                    |                                      |                                     |                                       |                                       |                                                         |                                    |                                      |                                   |                                    |                                    |                                   |                                      |                                      |                                    |                                       |
| 11h. Reason for change, interruption or completion | <input type="checkbox"/> Completed intensive phase<br><input type="checkbox"/> Completed continuation phase<br><input type="checkbox"/> TB treatment failure<br><input type="checkbox"/> Drug resistance<br><input type="checkbox"/> Pregnancy<br><input type="checkbox"/> Side effects or toxicity<br><input type="checkbox"/> Incompatibility with ART (antiretroviral treatment)<br><input type="checkbox"/> Drug interaction<br><input type="checkbox"/> Participant stopped taking the meds<br><input type="checkbox"/> Lost to follow up<br><input type="checkbox"/> Dose adjustment (e.g. for weight change)<br><input type="checkbox"/> Death<br><input type="checkbox"/> Other _____<br><input type="checkbox"/> Unknown                                                                                                                                                                                                                                                                                                                                                                                                                                                                                                                                                                     |  |                               |                                       |                             |                                       |                                     |                                     |                                       |                                      |                                    |                                      |                                     |                                       |                                       |                                                         |                                    |                                      |                                   |                                    |                                    |                                   |                                      |                                      |                                    |                                       |
| <b>TB Drug 12</b>                                  |                                                                                                                                                                                                                                                                                                                                                                                                                                                                                                                                                                                                                                                                                                                                                                                                                                                                                                                                                                                                                                                                                                                                                                                                                                                                                                       |  |                               |                                       |                             |                                       |                                     |                                     |                                       |                                      |                                    |                                      |                                     |                                       |                                       |                                                         |                                    |                                      |                                   |                                    |                                    |                                   |                                      |                                      |                                    |                                       |
| 12. Drug 12<br>(Select one)                        | <table border="1"> <tr> <td><input type="checkbox"/> RHZE</td> <td><input type="checkbox"/> Levofloxacin</td> </tr> <tr> <td><input type="checkbox"/> RH</td> <td><input type="checkbox"/> Moxifloxacin</td> </tr> <tr> <td><input type="checkbox"/> Rifampicin</td> <td><input type="checkbox"/> Terizidone</td> </tr> <tr> <td><input type="checkbox"/> Pyrazinamide</td> <td><input type="checkbox"/> Cycloserine</td> </tr> <tr> <td><input type="checkbox"/> Isoniazid</td> <td><input type="checkbox"/> Ethionamide</td> </tr> <tr> <td><input type="checkbox"/> Ethambutol</td> <td><input type="checkbox"/> Protionamide</td> </tr> <tr> <td><input type="checkbox"/> Streptomycin</td> <td><input type="checkbox"/> Para-aminosalicylic acid (PAS)</td> </tr> <tr> <td><input type="checkbox"/> Rifabutin</td> <td><input type="checkbox"/> Clofazimine</td> </tr> <tr> <td><input type="checkbox"/> Amikacin</td> <td><input type="checkbox"/> Linezolid</td> </tr> <tr> <td><input type="checkbox"/> Kanamycin</td> <td><input type="checkbox"/> Imipenem</td> </tr> <tr> <td><input type="checkbox"/> Capreomycin</td> <td><input type="checkbox"/> Bedaquiline</td> </tr> <tr> <td><input type="checkbox"/> Ofloxacin</td> <td><input type="checkbox"/> Other: _____</td> </tr> </table> |  | <input type="checkbox"/> RHZE | <input type="checkbox"/> Levofloxacin | <input type="checkbox"/> RH | <input type="checkbox"/> Moxifloxacin | <input type="checkbox"/> Rifampicin | <input type="checkbox"/> Terizidone | <input type="checkbox"/> Pyrazinamide | <input type="checkbox"/> Cycloserine | <input type="checkbox"/> Isoniazid | <input type="checkbox"/> Ethionamide | <input type="checkbox"/> Ethambutol | <input type="checkbox"/> Protionamide | <input type="checkbox"/> Streptomycin | <input type="checkbox"/> Para-aminosalicylic acid (PAS) | <input type="checkbox"/> Rifabutin | <input type="checkbox"/> Clofazimine | <input type="checkbox"/> Amikacin | <input type="checkbox"/> Linezolid | <input type="checkbox"/> Kanamycin | <input type="checkbox"/> Imipenem | <input type="checkbox"/> Capreomycin | <input type="checkbox"/> Bedaquiline | <input type="checkbox"/> Ofloxacin | <input type="checkbox"/> Other: _____ |
| <input type="checkbox"/> RHZE                      | <input type="checkbox"/> Levofloxacin                                                                                                                                                                                                                                                                                                                                                                                                                                                                                                                                                                                                                                                                                                                                                                                                                                                                                                                                                                                                                                                                                                                                                                                                                                                                 |  |                               |                                       |                             |                                       |                                     |                                     |                                       |                                      |                                    |                                      |                                     |                                       |                                       |                                                         |                                    |                                      |                                   |                                    |                                    |                                   |                                      |                                      |                                    |                                       |
| <input type="checkbox"/> RH                        | <input type="checkbox"/> Moxifloxacin                                                                                                                                                                                                                                                                                                                                                                                                                                                                                                                                                                                                                                                                                                                                                                                                                                                                                                                                                                                                                                                                                                                                                                                                                                                                 |  |                               |                                       |                             |                                       |                                     |                                     |                                       |                                      |                                    |                                      |                                     |                                       |                                       |                                                         |                                    |                                      |                                   |                                    |                                    |                                   |                                      |                                      |                                    |                                       |
| <input type="checkbox"/> Rifampicin                | <input type="checkbox"/> Terizidone                                                                                                                                                                                                                                                                                                                                                                                                                                                                                                                                                                                                                                                                                                                                                                                                                                                                                                                                                                                                                                                                                                                                                                                                                                                                   |  |                               |                                       |                             |                                       |                                     |                                     |                                       |                                      |                                    |                                      |                                     |                                       |                                       |                                                         |                                    |                                      |                                   |                                    |                                    |                                   |                                      |                                      |                                    |                                       |
| <input type="checkbox"/> Pyrazinamide              | <input type="checkbox"/> Cycloserine                                                                                                                                                                                                                                                                                                                                                                                                                                                                                                                                                                                                                                                                                                                                                                                                                                                                                                                                                                                                                                                                                                                                                                                                                                                                  |  |                               |                                       |                             |                                       |                                     |                                     |                                       |                                      |                                    |                                      |                                     |                                       |                                       |                                                         |                                    |                                      |                                   |                                    |                                    |                                   |                                      |                                      |                                    |                                       |
| <input type="checkbox"/> Isoniazid                 | <input type="checkbox"/> Ethionamide                                                                                                                                                                                                                                                                                                                                                                                                                                                                                                                                                                                                                                                                                                                                                                                                                                                                                                                                                                                                                                                                                                                                                                                                                                                                  |  |                               |                                       |                             |                                       |                                     |                                     |                                       |                                      |                                    |                                      |                                     |                                       |                                       |                                                         |                                    |                                      |                                   |                                    |                                    |                                   |                                      |                                      |                                    |                                       |
| <input type="checkbox"/> Ethambutol                | <input type="checkbox"/> Protionamide                                                                                                                                                                                                                                                                                                                                                                                                                                                                                                                                                                                                                                                                                                                                                                                                                                                                                                                                                                                                                                                                                                                                                                                                                                                                 |  |                               |                                       |                             |                                       |                                     |                                     |                                       |                                      |                                    |                                      |                                     |                                       |                                       |                                                         |                                    |                                      |                                   |                                    |                                    |                                   |                                      |                                      |                                    |                                       |
| <input type="checkbox"/> Streptomycin              | <input type="checkbox"/> Para-aminosalicylic acid (PAS)                                                                                                                                                                                                                                                                                                                                                                                                                                                                                                                                                                                                                                                                                                                                                                                                                                                                                                                                                                                                                                                                                                                                                                                                                                               |  |                               |                                       |                             |                                       |                                     |                                     |                                       |                                      |                                    |                                      |                                     |                                       |                                       |                                                         |                                    |                                      |                                   |                                    |                                    |                                   |                                      |                                      |                                    |                                       |
| <input type="checkbox"/> Rifabutin                 | <input type="checkbox"/> Clofazimine                                                                                                                                                                                                                                                                                                                                                                                                                                                                                                                                                                                                                                                                                                                                                                                                                                                                                                                                                                                                                                                                                                                                                                                                                                                                  |  |                               |                                       |                             |                                       |                                     |                                     |                                       |                                      |                                    |                                      |                                     |                                       |                                       |                                                         |                                    |                                      |                                   |                                    |                                    |                                   |                                      |                                      |                                    |                                       |
| <input type="checkbox"/> Amikacin                  | <input type="checkbox"/> Linezolid                                                                                                                                                                                                                                                                                                                                                                                                                                                                                                                                                                                                                                                                                                                                                                                                                                                                                                                                                                                                                                                                                                                                                                                                                                                                    |  |                               |                                       |                             |                                       |                                     |                                     |                                       |                                      |                                    |                                      |                                     |                                       |                                       |                                                         |                                    |                                      |                                   |                                    |                                    |                                   |                                      |                                      |                                    |                                       |
| <input type="checkbox"/> Kanamycin                 | <input type="checkbox"/> Imipenem                                                                                                                                                                                                                                                                                                                                                                                                                                                                                                                                                                                                                                                                                                                                                                                                                                                                                                                                                                                                                                                                                                                                                                                                                                                                     |  |                               |                                       |                             |                                       |                                     |                                     |                                       |                                      |                                    |                                      |                                     |                                       |                                       |                                                         |                                    |                                      |                                   |                                    |                                    |                                   |                                      |                                      |                                    |                                       |
| <input type="checkbox"/> Capreomycin               | <input type="checkbox"/> Bedaquiline                                                                                                                                                                                                                                                                                                                                                                                                                                                                                                                                                                                                                                                                                                                                                                                                                                                                                                                                                                                                                                                                                                                                                                                                                                                                  |  |                               |                                       |                             |                                       |                                     |                                     |                                       |                                      |                                    |                                      |                                     |                                       |                                       |                                                         |                                    |                                      |                                   |                                    |                                    |                                   |                                      |                                      |                                    |                                       |
| <input type="checkbox"/> Ofloxacin                 | <input type="checkbox"/> Other: _____                                                                                                                                                                                                                                                                                                                                                                                                                                                                                                                                                                                                                                                                                                                                                                                                                                                                                                                                                                                                                                                                                                                                                                                                                                                                 |  |                               |                                       |                             |                                       |                                     |                                     |                                       |                                      |                                    |                                      |                                     |                                       |                                       |                                                         |                                    |                                      |                                   |                                    |                                    |                                   |                                      |                                      |                                    |                                       |
| 12a. If RHZE, combination:                         | <input type="checkbox"/> RHZE 150/75/400/275 - 2 tablets<br><input type="checkbox"/> RHZE 150/75/400/275 - 3 tablets<br><input type="checkbox"/> RHZE 150/75/400/275 - 4 tablets<br><input type="checkbox"/> RHZE 150/75/400/275 - 5 tablets                                                                                                                                                                                                                                                                                                                                                                                                                                                                                                                                                                                                                                                                                                                                                                                                                                                                                                                                                                                                                                                          |  |                               |                                       |                             |                                       |                                     |                                     |                                       |                                      |                                    |                                      |                                     |                                       |                                       |                                                         |                                    |                                      |                                   |                                    |                                    |                                   |                                      |                                      |                                    |                                       |
| 12b. If RH, combination:                           | <input type="checkbox"/> RH 150/75 - 2 tablets<br><input type="checkbox"/> RH 150/75 - 3 tablets<br><input type="checkbox"/> RH 150/75 - 4 tablets<br><input type="checkbox"/> RH 150/75 - 5 tablets<br><input type="checkbox"/> RH 300/200 - 1 tablet or capsule<br><input type="checkbox"/> RH 300/200 - 2 tablets or capsules                                                                                                                                                                                                                                                                                                                                                                                                                                                                                                                                                                                                                                                                                                                                                                                                                                                                                                                                                                      |  |                               |                                       |                             |                                       |                                     |                                     |                                       |                                      |                                    |                                      |                                     |                                       |                                       |                                                         |                                    |                                      |                                   |                                    |                                    |                                   |                                      |                                      |                                    |                                       |

## IeDEA TB SRN

|                                                                                                                                                                                                                                                                                                                                                                                                                                                                   |                                                                                                                                                                                                                                                                                                                                                                                                                                                                                                                                                                                                                                                                                                                                                                                                                                                                                                                                                                                                                                                                                           |                                                                                                                                                                                                                                                                                                                                                                                                                                                                   |                                                                                                                                                                                                                                                                                                                                                                                                                                                                                                                |
|-------------------------------------------------------------------------------------------------------------------------------------------------------------------------------------------------------------------------------------------------------------------------------------------------------------------------------------------------------------------------------------------------------------------------------------------------------------------|-------------------------------------------------------------------------------------------------------------------------------------------------------------------------------------------------------------------------------------------------------------------------------------------------------------------------------------------------------------------------------------------------------------------------------------------------------------------------------------------------------------------------------------------------------------------------------------------------------------------------------------------------------------------------------------------------------------------------------------------------------------------------------------------------------------------------------------------------------------------------------------------------------------------------------------------------------------------------------------------------------------------------------------------------------------------------------------------|-------------------------------------------------------------------------------------------------------------------------------------------------------------------------------------------------------------------------------------------------------------------------------------------------------------------------------------------------------------------------------------------------------------------------------------------------------------------|----------------------------------------------------------------------------------------------------------------------------------------------------------------------------------------------------------------------------------------------------------------------------------------------------------------------------------------------------------------------------------------------------------------------------------------------------------------------------------------------------------------|
|                                                                                                                                                                                                                                                                                                                                                                                                                                                                   | <input type="checkbox"/> RH 300/200 - 1 tablet or capsule + RH 150/100 - 1 tablet<br><input type="checkbox"/> RH 300/200 - 2 tablets or capsules + RH 150/100 - 1 tablet                                                                                                                                                                                                                                                                                                                                                                                                                                                                                                                                                                                                                                                                                                                                                                                                                                                                                                                  |                                                                                                                                                                                                                                                                                                                                                                                                                                                                   |                                                                                                                                                                                                                                                                                                                                                                                                                                                                                                                |
| 12c. Other drugs - Dose (mg)                                                                                                                                                                                                                                                                                                                                                                                                                                      | _ _ _ _                                                                                                                                                                                                                                                                                                                                                                                                                                                                                                                                                                                                                                                                                                                                                                                                                                                                                                                                                                                                                                                                                   |                                                                                                                                                                                                                                                                                                                                                                                                                                                                   |                                                                                                                                                                                                                                                                                                                                                                                                                                                                                                                |
| 12d. How many times a day is this medication prescribed?                                                                                                                                                                                                                                                                                                                                                                                                          | _ _ _                                                                                                                                                                                                                                                                                                                                                                                                                                                                                                                                                                                                                                                                                                                                                                                                                                                                                                                                                                                                                                                                                     |                                                                                                                                                                                                                                                                                                                                                                                                                                                                   |                                                                                                                                                                                                                                                                                                                                                                                                                                                                                                                |
| 12e. How many days a week is this medication prescribed?                                                                                                                                                                                                                                                                                                                                                                                                          | _ _ _                                                                                                                                                                                                                                                                                                                                                                                                                                                                                                                                                                                                                                                                                                                                                                                                                                                                                                                                                                                                                                                                                     |                                                                                                                                                                                                                                                                                                                                                                                                                                                                   |                                                                                                                                                                                                                                                                                                                                                                                                                                                                                                                |
| 12f. Start Date                                                                                                                                                                                                                                                                                                                                                                                                                                                   | _ _ / _ _ / _ _ _ _  (dd/mm/yyyy)                                                                                                                                                                                                                                                                                                                                                                                                                                                                                                                                                                                                                                                                                                                                                                                                                                                                                                                                                                                                                                                         |                                                                                                                                                                                                                                                                                                                                                                                                                                                                   |                                                                                                                                                                                                                                                                                                                                                                                                                                                                                                                |
| 12g. Stop Date                                                                                                                                                                                                                                                                                                                                                                                                                                                    | _ _ / _ _ / _ _ _ _  (dd/mm/yyyy)<br><input type="checkbox"/> Treatment Ongoing ( <i>Return to update the status at next visit. Update stop date and reason once medication is stopped.</i> )<br><input type="checkbox"/> Unknown                                                                                                                                                                                                                                                                                                                                                                                                                                                                                                                                                                                                                                                                                                                                                                                                                                                         |                                                                                                                                                                                                                                                                                                                                                                                                                                                                   |                                                                                                                                                                                                                                                                                                                                                                                                                                                                                                                |
| 12h. Reason for change, interruption or completion                                                                                                                                                                                                                                                                                                                                                                                                                | <input type="checkbox"/> Completed intensive phase<br><input type="checkbox"/> Completed continuation phase<br><input type="checkbox"/> TB treatment failure<br><input type="checkbox"/> Drug resistance<br><input type="checkbox"/> Pregnancy<br><input type="checkbox"/> Side effects or toxicity<br><input type="checkbox"/> Incompatibility with ART (antiretroviral treatment)<br><input type="checkbox"/> Drug interaction<br><input type="checkbox"/> Participant stopped taking the meds<br><input type="checkbox"/> Lost to follow up<br><input type="checkbox"/> Dose adjustment (e.g. for weight change)<br><input type="checkbox"/> Death<br><input type="checkbox"/> Other _____<br><input type="checkbox"/> Unknown                                                                                                                                                                                                                                                                                                                                                         |                                                                                                                                                                                                                                                                                                                                                                                                                                                                   |                                                                                                                                                                                                                                                                                                                                                                                                                                                                                                                |
| <b>TB Drug 13</b>                                                                                                                                                                                                                                                                                                                                                                                                                                                 |                                                                                                                                                                                                                                                                                                                                                                                                                                                                                                                                                                                                                                                                                                                                                                                                                                                                                                                                                                                                                                                                                           |                                                                                                                                                                                                                                                                                                                                                                                                                                                                   |                                                                                                                                                                                                                                                                                                                                                                                                                                                                                                                |
| 13. TB Drug 13<br>( <i>Select one</i> )                                                                                                                                                                                                                                                                                                                                                                                                                           | <table border="1"> <tr> <td> <input type="checkbox"/> RHZE<br/> <input type="checkbox"/> RH<br/> <input type="checkbox"/> Rifampicin<br/> <input type="checkbox"/> Pyrazinamide<br/> <input type="checkbox"/> Isoniazid<br/> <input type="checkbox"/> Ethambutol<br/> <input type="checkbox"/> Streptomycin<br/> <input type="checkbox"/> Rifabutin<br/> <input type="checkbox"/> Amikacin<br/> <input type="checkbox"/> Kanamycin<br/> <input type="checkbox"/> Capreomycin<br/> <input type="checkbox"/> Ofloxacin </td> <td> <input type="checkbox"/> Levofloxacin<br/> <input type="checkbox"/> Moxifloxacin<br/> <input type="checkbox"/> Terizidone<br/> <input type="checkbox"/> Cycloserine<br/> <input type="checkbox"/> Ethionamide<br/> <input type="checkbox"/> Prothionamide<br/> <input type="checkbox"/> Para-aminosalicylic acid (PAS)<br/> <input type="checkbox"/> Clofazimine<br/> <input type="checkbox"/> Linezolid<br/> <input type="checkbox"/> Imipenem<br/> <input type="checkbox"/> Bedaquiline<br/> <input type="checkbox"/> Other: _____ </td> </tr> </table> | <input type="checkbox"/> RHZE<br><input type="checkbox"/> RH<br><input type="checkbox"/> Rifampicin<br><input type="checkbox"/> Pyrazinamide<br><input type="checkbox"/> Isoniazid<br><input type="checkbox"/> Ethambutol<br><input type="checkbox"/> Streptomycin<br><input type="checkbox"/> Rifabutin<br><input type="checkbox"/> Amikacin<br><input type="checkbox"/> Kanamycin<br><input type="checkbox"/> Capreomycin<br><input type="checkbox"/> Ofloxacin | <input type="checkbox"/> Levofloxacin<br><input type="checkbox"/> Moxifloxacin<br><input type="checkbox"/> Terizidone<br><input type="checkbox"/> Cycloserine<br><input type="checkbox"/> Ethionamide<br><input type="checkbox"/> Prothionamide<br><input type="checkbox"/> Para-aminosalicylic acid (PAS)<br><input type="checkbox"/> Clofazimine<br><input type="checkbox"/> Linezolid<br><input type="checkbox"/> Imipenem<br><input type="checkbox"/> Bedaquiline<br><input type="checkbox"/> Other: _____ |
| <input type="checkbox"/> RHZE<br><input type="checkbox"/> RH<br><input type="checkbox"/> Rifampicin<br><input type="checkbox"/> Pyrazinamide<br><input type="checkbox"/> Isoniazid<br><input type="checkbox"/> Ethambutol<br><input type="checkbox"/> Streptomycin<br><input type="checkbox"/> Rifabutin<br><input type="checkbox"/> Amikacin<br><input type="checkbox"/> Kanamycin<br><input type="checkbox"/> Capreomycin<br><input type="checkbox"/> Ofloxacin | <input type="checkbox"/> Levofloxacin<br><input type="checkbox"/> Moxifloxacin<br><input type="checkbox"/> Terizidone<br><input type="checkbox"/> Cycloserine<br><input type="checkbox"/> Ethionamide<br><input type="checkbox"/> Prothionamide<br><input type="checkbox"/> Para-aminosalicylic acid (PAS)<br><input type="checkbox"/> Clofazimine<br><input type="checkbox"/> Linezolid<br><input type="checkbox"/> Imipenem<br><input type="checkbox"/> Bedaquiline<br><input type="checkbox"/> Other: _____                                                                                                                                                                                                                                                                                                                                                                                                                                                                                                                                                                            |                                                                                                                                                                                                                                                                                                                                                                                                                                                                   |                                                                                                                                                                                                                                                                                                                                                                                                                                                                                                                |

## IeDEA TB SRN

|                                                          |                                                                                                                                                                                                                                                                                                                                                                                                                                                                                                                                                                                                                                                                                                                                   |
|----------------------------------------------------------|-----------------------------------------------------------------------------------------------------------------------------------------------------------------------------------------------------------------------------------------------------------------------------------------------------------------------------------------------------------------------------------------------------------------------------------------------------------------------------------------------------------------------------------------------------------------------------------------------------------------------------------------------------------------------------------------------------------------------------------|
| 13a. If RHZE, combination:                               | <input type="checkbox"/> RHZE 150/75/400/275 - 2 tablets<br><input type="checkbox"/> RHZE 150/75/400/275 - 3 tablets<br><input type="checkbox"/> RHZE 150/75/400/275 - 4 tablets<br><input type="checkbox"/> RHZE 150/75/400/275 - 5 tablets                                                                                                                                                                                                                                                                                                                                                                                                                                                                                      |
| 13b. If RH, combination:                                 | <input type="checkbox"/> RH 150/75 - 2 tablets<br><input type="checkbox"/> RH 150/75 - 3 tablets<br><input type="checkbox"/> RH 150/75 - 4 tablets<br><input type="checkbox"/> RH 150/75 - 5 tablets<br><input type="checkbox"/> RH 300/200 - 1 tablet or capsule<br><input type="checkbox"/> RH 300/200 - 2 tablets or capsules<br><input type="checkbox"/> RH 300/200 - 1 tablet or capsule + RH 150/100 - 1 tablet<br><input type="checkbox"/> RH 300/200 - 2 tablets or capsules + RH 150/100 - 1 tablet                                                                                                                                                                                                                      |
| 13c. Other drugs – Dose (mg)                             | _ _ _ _                                                                                                                                                                                                                                                                                                                                                                                                                                                                                                                                                                                                                                                                                                                           |
| 13d. How many times a day is this medication prescribed? | _ _ _                                                                                                                                                                                                                                                                                                                                                                                                                                                                                                                                                                                                                                                                                                                             |
| 13e. How many days a week is this medication prescribed? | _ _ _                                                                                                                                                                                                                                                                                                                                                                                                                                                                                                                                                                                                                                                                                                                             |
| 13f. Start Date                                          | _ _ / _ _ / _ _ _ _  (dd/mm/yyyy)                                                                                                                                                                                                                                                                                                                                                                                                                                                                                                                                                                                                                                                                                                 |
| 13g. Stop Date                                           | _ _ / _ _ / _ _ _ _  (dd/mm/yyyy)<br><input type="checkbox"/> Treatment Ongoing ( <i>Return to update the status at next visit. Update stop date and reason once medication is stopped.</i> )<br><input type="checkbox"/> Unknown                                                                                                                                                                                                                                                                                                                                                                                                                                                                                                 |
| 13h. Reason for change, interruption or completion       | <input type="checkbox"/> Completed intensive phase<br><input type="checkbox"/> Completed continuation phase<br><input type="checkbox"/> TB treatment failure<br><input type="checkbox"/> Drug resistance<br><input type="checkbox"/> Pregnancy<br><input type="checkbox"/> Side effects or toxicity<br><input type="checkbox"/> Incompatibility with ART (antiretroviral treatment)<br><input type="checkbox"/> Drug interaction<br><input type="checkbox"/> Participant stopped taking the meds<br><input type="checkbox"/> Lost to follow up<br><input type="checkbox"/> Dose adjustment (e.g. for weight change)<br><input type="checkbox"/> Death<br><input type="checkbox"/> Other _____<br><input type="checkbox"/> Unknown |
| <b>TB Drug 14</b>                                        |                                                                                                                                                                                                                                                                                                                                                                                                                                                                                                                                                                                                                                                                                                                                   |

## IeDEA TB SRN

|                                                                                                                                                                                                                                                                                                                                                                                                                                                                   |                                                                                                                                                                                                                                                                                                                                                                                                                                                                                                                                                                                                                                                                                                                                                                                                                                                                                                                                                                                                                                                                                                                                                                                                 |                                                                                                                                                                                                                                                                                                                                                                                                                                                                   |                                                                                                                                                                                                                                                                                                                                                                                                                                                                                                               |
|-------------------------------------------------------------------------------------------------------------------------------------------------------------------------------------------------------------------------------------------------------------------------------------------------------------------------------------------------------------------------------------------------------------------------------------------------------------------|-------------------------------------------------------------------------------------------------------------------------------------------------------------------------------------------------------------------------------------------------------------------------------------------------------------------------------------------------------------------------------------------------------------------------------------------------------------------------------------------------------------------------------------------------------------------------------------------------------------------------------------------------------------------------------------------------------------------------------------------------------------------------------------------------------------------------------------------------------------------------------------------------------------------------------------------------------------------------------------------------------------------------------------------------------------------------------------------------------------------------------------------------------------------------------------------------|-------------------------------------------------------------------------------------------------------------------------------------------------------------------------------------------------------------------------------------------------------------------------------------------------------------------------------------------------------------------------------------------------------------------------------------------------------------------|---------------------------------------------------------------------------------------------------------------------------------------------------------------------------------------------------------------------------------------------------------------------------------------------------------------------------------------------------------------------------------------------------------------------------------------------------------------------------------------------------------------|
| 14. TB Drug 14<br>(Select one)                                                                                                                                                                                                                                                                                                                                                                                                                                    | <table border="1" style="width: 100%;"> <tr> <td style="width: 50%; vertical-align: top;"> <input type="checkbox"/> RHZE<br/> <input type="checkbox"/> RH<br/> <input type="checkbox"/> Rifampicin<br/> <input type="checkbox"/> Pyrazinamide<br/> <input type="checkbox"/> Isoniazid<br/> <input type="checkbox"/> Ethambutol<br/> <input type="checkbox"/> Streptomycin<br/> <input type="checkbox"/> Rifabutin<br/> <input type="checkbox"/> Amikacin<br/> <input type="checkbox"/> Kanamycin<br/> <input type="checkbox"/> Capreomycin<br/> <input type="checkbox"/> Ofloxacin </td> <td style="width: 50%; vertical-align: top;"> <input type="checkbox"/> Levofloxacin<br/> <input type="checkbox"/> Moxifloxacin<br/> <input type="checkbox"/> Terizidone<br/> <input type="checkbox"/> Cycloserine<br/> <input type="checkbox"/> Ethionamide<br/> <input type="checkbox"/> Protionamide<br/> <input type="checkbox"/> Para-aminosalicylic acid (PAS)<br/> <input type="checkbox"/> Clofazimine<br/> <input type="checkbox"/> Linezolid<br/> <input type="checkbox"/> Imipenem<br/> <input type="checkbox"/> Bedaquiline<br/> <input type="checkbox"/> Other: _____ </td> </tr> </table> | <input type="checkbox"/> RHZE<br><input type="checkbox"/> RH<br><input type="checkbox"/> Rifampicin<br><input type="checkbox"/> Pyrazinamide<br><input type="checkbox"/> Isoniazid<br><input type="checkbox"/> Ethambutol<br><input type="checkbox"/> Streptomycin<br><input type="checkbox"/> Rifabutin<br><input type="checkbox"/> Amikacin<br><input type="checkbox"/> Kanamycin<br><input type="checkbox"/> Capreomycin<br><input type="checkbox"/> Ofloxacin | <input type="checkbox"/> Levofloxacin<br><input type="checkbox"/> Moxifloxacin<br><input type="checkbox"/> Terizidone<br><input type="checkbox"/> Cycloserine<br><input type="checkbox"/> Ethionamide<br><input type="checkbox"/> Protionamide<br><input type="checkbox"/> Para-aminosalicylic acid (PAS)<br><input type="checkbox"/> Clofazimine<br><input type="checkbox"/> Linezolid<br><input type="checkbox"/> Imipenem<br><input type="checkbox"/> Bedaquiline<br><input type="checkbox"/> Other: _____ |
| <input type="checkbox"/> RHZE<br><input type="checkbox"/> RH<br><input type="checkbox"/> Rifampicin<br><input type="checkbox"/> Pyrazinamide<br><input type="checkbox"/> Isoniazid<br><input type="checkbox"/> Ethambutol<br><input type="checkbox"/> Streptomycin<br><input type="checkbox"/> Rifabutin<br><input type="checkbox"/> Amikacin<br><input type="checkbox"/> Kanamycin<br><input type="checkbox"/> Capreomycin<br><input type="checkbox"/> Ofloxacin | <input type="checkbox"/> Levofloxacin<br><input type="checkbox"/> Moxifloxacin<br><input type="checkbox"/> Terizidone<br><input type="checkbox"/> Cycloserine<br><input type="checkbox"/> Ethionamide<br><input type="checkbox"/> Protionamide<br><input type="checkbox"/> Para-aminosalicylic acid (PAS)<br><input type="checkbox"/> Clofazimine<br><input type="checkbox"/> Linezolid<br><input type="checkbox"/> Imipenem<br><input type="checkbox"/> Bedaquiline<br><input type="checkbox"/> Other: _____                                                                                                                                                                                                                                                                                                                                                                                                                                                                                                                                                                                                                                                                                   |                                                                                                                                                                                                                                                                                                                                                                                                                                                                   |                                                                                                                                                                                                                                                                                                                                                                                                                                                                                                               |
| 14a. If RHZE, combination:                                                                                                                                                                                                                                                                                                                                                                                                                                        | <input type="checkbox"/> RHZE 150/75/400/275 - 2 tablets<br><input type="checkbox"/> RHZE 150/75/400/275 - 3 tablets<br><input type="checkbox"/> RHZE 150/75/400/275 - 4 tablets<br><input type="checkbox"/> RHZE 150/75/400/275 - 5 tablets                                                                                                                                                                                                                                                                                                                                                                                                                                                                                                                                                                                                                                                                                                                                                                                                                                                                                                                                                    |                                                                                                                                                                                                                                                                                                                                                                                                                                                                   |                                                                                                                                                                                                                                                                                                                                                                                                                                                                                                               |
| 14b. f RH, combination:                                                                                                                                                                                                                                                                                                                                                                                                                                           | <input type="checkbox"/> RH 150/75 - 2 tablets<br><input type="checkbox"/> RH 150/75 - 3 tablets<br><input type="checkbox"/> RH 150/75 - 4 tablets<br><input type="checkbox"/> RH 150/75 - 5 tablets<br><input type="checkbox"/> RH 300/200 - 1 tablet or capsule<br><input type="checkbox"/> RH 300/200 - 2 tablets or capsules<br><input type="checkbox"/> RH 300/200 - 1 tablet or capsule + RH 150/100 - 1 tablet<br><input type="checkbox"/> RH 300/200 - 2 tablets or capsules + RH 150/100 - 1 tablet                                                                                                                                                                                                                                                                                                                                                                                                                                                                                                                                                                                                                                                                                    |                                                                                                                                                                                                                                                                                                                                                                                                                                                                   |                                                                                                                                                                                                                                                                                                                                                                                                                                                                                                               |
| 14c. Other drugs – Dose (mg)                                                                                                                                                                                                                                                                                                                                                                                                                                      | _ _ _ _                                                                                                                                                                                                                                                                                                                                                                                                                                                                                                                                                                                                                                                                                                                                                                                                                                                                                                                                                                                                                                                                                                                                                                                         |                                                                                                                                                                                                                                                                                                                                                                                                                                                                   |                                                                                                                                                                                                                                                                                                                                                                                                                                                                                                               |
| 14d. How many times a day is this medication prescribed?                                                                                                                                                                                                                                                                                                                                                                                                          | _ _ _                                                                                                                                                                                                                                                                                                                                                                                                                                                                                                                                                                                                                                                                                                                                                                                                                                                                                                                                                                                                                                                                                                                                                                                           |                                                                                                                                                                                                                                                                                                                                                                                                                                                                   |                                                                                                                                                                                                                                                                                                                                                                                                                                                                                                               |
| 14e. How many days a week is this medication prescribed?                                                                                                                                                                                                                                                                                                                                                                                                          | _ _ _                                                                                                                                                                                                                                                                                                                                                                                                                                                                                                                                                                                                                                                                                                                                                                                                                                                                                                                                                                                                                                                                                                                                                                                           |                                                                                                                                                                                                                                                                                                                                                                                                                                                                   |                                                                                                                                                                                                                                                                                                                                                                                                                                                                                                               |
| 14f. 1Start Date                                                                                                                                                                                                                                                                                                                                                                                                                                                  | _ _ / _ _ / _ _ _ _  (dd/mm/yyyy)                                                                                                                                                                                                                                                                                                                                                                                                                                                                                                                                                                                                                                                                                                                                                                                                                                                                                                                                                                                                                                                                                                                                                               |                                                                                                                                                                                                                                                                                                                                                                                                                                                                   |                                                                                                                                                                                                                                                                                                                                                                                                                                                                                                               |
| 14g. Stop Date                                                                                                                                                                                                                                                                                                                                                                                                                                                    | _ _ / _ _ / _ _ _ _  (dd/mm/yyyy)<br><input type="checkbox"/> Treatment Ongoing (Return to update the status at next visit. Update stop date and reason once medication is stopped.)<br><input type="checkbox"/> Unknown                                                                                                                                                                                                                                                                                                                                                                                                                                                                                                                                                                                                                                                                                                                                                                                                                                                                                                                                                                        |                                                                                                                                                                                                                                                                                                                                                                                                                                                                   |                                                                                                                                                                                                                                                                                                                                                                                                                                                                                                               |
| 14h. Reason for change, interruption or completion                                                                                                                                                                                                                                                                                                                                                                                                                | <input type="checkbox"/> Completed intensive phase<br><input type="checkbox"/> Completed continuation phase<br><input type="checkbox"/> TB treatment failure<br><input type="checkbox"/> Drug resistance<br><input type="checkbox"/> Pregnancy<br><input type="checkbox"/> Side effects or toxicity                                                                                                                                                                                                                                                                                                                                                                                                                                                                                                                                                                                                                                                                                                                                                                                                                                                                                             |                                                                                                                                                                                                                                                                                                                                                                                                                                                                   |                                                                                                                                                                                                                                                                                                                                                                                                                                                                                                               |

## leDEA TB SRN

|                                                                                                                                                                                                                                                                                                                                                                                                                                                                   |                                                                                                                                                                                                                                                                                                                                                                                                                                                                                                                                                                                                                                                                                                                                                                                                                                                                                                                                                                                                                                                                                          |                                                                                                                                                                                                                                                                                                                                                                                                                                                                   |                                                                                                                                                                                                                                                                                                                                                                                                                                                                                                               |
|-------------------------------------------------------------------------------------------------------------------------------------------------------------------------------------------------------------------------------------------------------------------------------------------------------------------------------------------------------------------------------------------------------------------------------------------------------------------|------------------------------------------------------------------------------------------------------------------------------------------------------------------------------------------------------------------------------------------------------------------------------------------------------------------------------------------------------------------------------------------------------------------------------------------------------------------------------------------------------------------------------------------------------------------------------------------------------------------------------------------------------------------------------------------------------------------------------------------------------------------------------------------------------------------------------------------------------------------------------------------------------------------------------------------------------------------------------------------------------------------------------------------------------------------------------------------|-------------------------------------------------------------------------------------------------------------------------------------------------------------------------------------------------------------------------------------------------------------------------------------------------------------------------------------------------------------------------------------------------------------------------------------------------------------------|---------------------------------------------------------------------------------------------------------------------------------------------------------------------------------------------------------------------------------------------------------------------------------------------------------------------------------------------------------------------------------------------------------------------------------------------------------------------------------------------------------------|
|                                                                                                                                                                                                                                                                                                                                                                                                                                                                   | <input type="checkbox"/> Incompatibility with ART (antiretroviral treatment)<br><input type="checkbox"/> Drug interaction<br><input type="checkbox"/> Participant stopped taking the meds<br><input type="checkbox"/> Lost to follow up<br><input type="checkbox"/> Dose adjustment (e.g. for weight change)<br><input type="checkbox"/> Death<br><input type="checkbox"/> Other _____<br><input type="checkbox"/> Unknown                                                                                                                                                                                                                                                                                                                                                                                                                                                                                                                                                                                                                                                               |                                                                                                                                                                                                                                                                                                                                                                                                                                                                   |                                                                                                                                                                                                                                                                                                                                                                                                                                                                                                               |
| <b>TB Drug 15</b>                                                                                                                                                                                                                                                                                                                                                                                                                                                 |                                                                                                                                                                                                                                                                                                                                                                                                                                                                                                                                                                                                                                                                                                                                                                                                                                                                                                                                                                                                                                                                                          |                                                                                                                                                                                                                                                                                                                                                                                                                                                                   |                                                                                                                                                                                                                                                                                                                                                                                                                                                                                                               |
| 15. TB Drug 15<br>(Select one)                                                                                                                                                                                                                                                                                                                                                                                                                                    | <table border="1"> <tr> <td> <input type="checkbox"/> RHZE<br/> <input type="checkbox"/> RH<br/> <input type="checkbox"/> Rifampicin<br/> <input type="checkbox"/> Pyrazinamide<br/> <input type="checkbox"/> Isoniazid<br/> <input type="checkbox"/> Ethambutol<br/> <input type="checkbox"/> Streptomycin<br/> <input type="checkbox"/> Rifabutin<br/> <input type="checkbox"/> Amikacin<br/> <input type="checkbox"/> Kanamycin<br/> <input type="checkbox"/> Capreomycin<br/> <input type="checkbox"/> Ofloxacin </td> <td> <input type="checkbox"/> Levofloxacin<br/> <input type="checkbox"/> Moxifloxacin<br/> <input type="checkbox"/> Terizidone<br/> <input type="checkbox"/> Cycloserine<br/> <input type="checkbox"/> Ethionamide<br/> <input type="checkbox"/> Protionamide<br/> <input type="checkbox"/> Para-aminosalicylic acid (PAS)<br/> <input type="checkbox"/> Clofazimine<br/> <input type="checkbox"/> Linezolid<br/> <input type="checkbox"/> Imipenem<br/> <input type="checkbox"/> Bedaquiline<br/> <input type="checkbox"/> Other: _____ </td> </tr> </table> | <input type="checkbox"/> RHZE<br><input type="checkbox"/> RH<br><input type="checkbox"/> Rifampicin<br><input type="checkbox"/> Pyrazinamide<br><input type="checkbox"/> Isoniazid<br><input type="checkbox"/> Ethambutol<br><input type="checkbox"/> Streptomycin<br><input type="checkbox"/> Rifabutin<br><input type="checkbox"/> Amikacin<br><input type="checkbox"/> Kanamycin<br><input type="checkbox"/> Capreomycin<br><input type="checkbox"/> Ofloxacin | <input type="checkbox"/> Levofloxacin<br><input type="checkbox"/> Moxifloxacin<br><input type="checkbox"/> Terizidone<br><input type="checkbox"/> Cycloserine<br><input type="checkbox"/> Ethionamide<br><input type="checkbox"/> Protionamide<br><input type="checkbox"/> Para-aminosalicylic acid (PAS)<br><input type="checkbox"/> Clofazimine<br><input type="checkbox"/> Linezolid<br><input type="checkbox"/> Imipenem<br><input type="checkbox"/> Bedaquiline<br><input type="checkbox"/> Other: _____ |
| <input type="checkbox"/> RHZE<br><input type="checkbox"/> RH<br><input type="checkbox"/> Rifampicin<br><input type="checkbox"/> Pyrazinamide<br><input type="checkbox"/> Isoniazid<br><input type="checkbox"/> Ethambutol<br><input type="checkbox"/> Streptomycin<br><input type="checkbox"/> Rifabutin<br><input type="checkbox"/> Amikacin<br><input type="checkbox"/> Kanamycin<br><input type="checkbox"/> Capreomycin<br><input type="checkbox"/> Ofloxacin | <input type="checkbox"/> Levofloxacin<br><input type="checkbox"/> Moxifloxacin<br><input type="checkbox"/> Terizidone<br><input type="checkbox"/> Cycloserine<br><input type="checkbox"/> Ethionamide<br><input type="checkbox"/> Protionamide<br><input type="checkbox"/> Para-aminosalicylic acid (PAS)<br><input type="checkbox"/> Clofazimine<br><input type="checkbox"/> Linezolid<br><input type="checkbox"/> Imipenem<br><input type="checkbox"/> Bedaquiline<br><input type="checkbox"/> Other: _____                                                                                                                                                                                                                                                                                                                                                                                                                                                                                                                                                                            |                                                                                                                                                                                                                                                                                                                                                                                                                                                                   |                                                                                                                                                                                                                                                                                                                                                                                                                                                                                                               |
| 15a. If RHZE, combination:                                                                                                                                                                                                                                                                                                                                                                                                                                        | <input type="checkbox"/> RHZE 150/75/400/275 - 2 tablets<br><input type="checkbox"/> RHZE 150/75/400/275 - 3 tablets<br><input type="checkbox"/> RHZE 150/75/400/275 - 4 tablets<br><input type="checkbox"/> RHZE 150/75/400/275 - 5 tablets                                                                                                                                                                                                                                                                                                                                                                                                                                                                                                                                                                                                                                                                                                                                                                                                                                             |                                                                                                                                                                                                                                                                                                                                                                                                                                                                   |                                                                                                                                                                                                                                                                                                                                                                                                                                                                                                               |
| 15b. If RH, combination:                                                                                                                                                                                                                                                                                                                                                                                                                                          | <input type="checkbox"/> RH 150/75 - 2 tablets<br><input type="checkbox"/> RH 150/75 - 3 tablets<br><input type="checkbox"/> RH 150/75 - 4 tablets<br><input type="checkbox"/> RH 150/75 - 5 tablets<br><input type="checkbox"/> RH 300/200 - 1 tablet or capsule<br><input type="checkbox"/> RH 300/200 - 2 tablets or capsules<br><input type="checkbox"/> RH 300/200 - 1 tablet or capsule + RH 150/100 - 1 tablet<br><input type="checkbox"/> RH 300/200 - 2 tablets or capsules + RH 150/100 - 1 tablet                                                                                                                                                                                                                                                                                                                                                                                                                                                                                                                                                                             |                                                                                                                                                                                                                                                                                                                                                                                                                                                                   |                                                                                                                                                                                                                                                                                                                                                                                                                                                                                                               |
| 15c. Other drugs – Dose (mg)                                                                                                                                                                                                                                                                                                                                                                                                                                      | _ _ _ _                                                                                                                                                                                                                                                                                                                                                                                                                                                                                                                                                                                                                                                                                                                                                                                                                                                                                                                                                                                                                                                                                  |                                                                                                                                                                                                                                                                                                                                                                                                                                                                   |                                                                                                                                                                                                                                                                                                                                                                                                                                                                                                               |
| 15d. How many times a day is this medication prescribed?                                                                                                                                                                                                                                                                                                                                                                                                          | _ _ _                                                                                                                                                                                                                                                                                                                                                                                                                                                                                                                                                                                                                                                                                                                                                                                                                                                                                                                                                                                                                                                                                    |                                                                                                                                                                                                                                                                                                                                                                                                                                                                   |                                                                                                                                                                                                                                                                                                                                                                                                                                                                                                               |
| 15e. How many days a week is this medication prescribed?                                                                                                                                                                                                                                                                                                                                                                                                          | _ _ _                                                                                                                                                                                                                                                                                                                                                                                                                                                                                                                                                                                                                                                                                                                                                                                                                                                                                                                                                                                                                                                                                    |                                                                                                                                                                                                                                                                                                                                                                                                                                                                   |                                                                                                                                                                                                                                                                                                                                                                                                                                                                                                               |
| 15f. Start Date                                                                                                                                                                                                                                                                                                                                                                                                                                                   | _ _ / _ _ / _ _ _ _  (dd/mm/yyyy)                                                                                                                                                                                                                                                                                                                                                                                                                                                                                                                                                                                                                                                                                                                                                                                                                                                                                                                                                                                                                                                        |                                                                                                                                                                                                                                                                                                                                                                                                                                                                   |                                                                                                                                                                                                                                                                                                                                                                                                                                                                                                               |
| 15g. Stop Date                                                                                                                                                                                                                                                                                                                                                                                                                                                    | _ _ / _ _ / _ _ _ _  (dd/mm/yyyy)                                                                                                                                                                                                                                                                                                                                                                                                                                                                                                                                                                                                                                                                                                                                                                                                                                                                                                                                                                                                                                                        |                                                                                                                                                                                                                                                                                                                                                                                                                                                                   |                                                                                                                                                                                                                                                                                                                                                                                                                                                                                                               |

## IeDEA TB SRN

|                                                                                                                                                                                                                                                                                                                                                                                                                                                                   |                                                                                                                                                                                                                                                                                                                                                                                                                                                                                                                                                                                                                                                                                                                                                                                                                                                                                                                                                                                                                                                                                          |                                                                                                                                                                                                                                                                                                                                                                                                                                                                   |                                                                                                                                                                                                                                                                                                                                                                                                                                                                                                               |
|-------------------------------------------------------------------------------------------------------------------------------------------------------------------------------------------------------------------------------------------------------------------------------------------------------------------------------------------------------------------------------------------------------------------------------------------------------------------|------------------------------------------------------------------------------------------------------------------------------------------------------------------------------------------------------------------------------------------------------------------------------------------------------------------------------------------------------------------------------------------------------------------------------------------------------------------------------------------------------------------------------------------------------------------------------------------------------------------------------------------------------------------------------------------------------------------------------------------------------------------------------------------------------------------------------------------------------------------------------------------------------------------------------------------------------------------------------------------------------------------------------------------------------------------------------------------|-------------------------------------------------------------------------------------------------------------------------------------------------------------------------------------------------------------------------------------------------------------------------------------------------------------------------------------------------------------------------------------------------------------------------------------------------------------------|---------------------------------------------------------------------------------------------------------------------------------------------------------------------------------------------------------------------------------------------------------------------------------------------------------------------------------------------------------------------------------------------------------------------------------------------------------------------------------------------------------------|
|                                                                                                                                                                                                                                                                                                                                                                                                                                                                   | <input type="checkbox"/> Treatment Ongoing ( <i>Return to update the status at next visit. Update stop date and reason once medication is stopped.</i> )<br><input type="checkbox"/> Unknown                                                                                                                                                                                                                                                                                                                                                                                                                                                                                                                                                                                                                                                                                                                                                                                                                                                                                             |                                                                                                                                                                                                                                                                                                                                                                                                                                                                   |                                                                                                                                                                                                                                                                                                                                                                                                                                                                                                               |
| 15h. Reason for change, interruption or completion                                                                                                                                                                                                                                                                                                                                                                                                                | <input type="checkbox"/> Completed intensive phase<br><input type="checkbox"/> Completed continuation phase<br><input type="checkbox"/> TB treatment failure<br><input type="checkbox"/> Drug resistance<br><input type="checkbox"/> Pregnancy<br><input type="checkbox"/> Side effects or toxicity<br><input type="checkbox"/> Incompatibility with ART (antiretroviral treatment)<br><input type="checkbox"/> Drug interaction<br><input type="checkbox"/> Participant stopped taking the meds<br><input type="checkbox"/> Lost to follow up<br><input type="checkbox"/> Dose adjustment (e.g. for weight change)<br><input type="checkbox"/> Death<br><input type="checkbox"/> Other _____<br><input type="checkbox"/> Unknown                                                                                                                                                                                                                                                                                                                                                        |                                                                                                                                                                                                                                                                                                                                                                                                                                                                   |                                                                                                                                                                                                                                                                                                                                                                                                                                                                                                               |
| <b>TB Drug 16</b>                                                                                                                                                                                                                                                                                                                                                                                                                                                 |                                                                                                                                                                                                                                                                                                                                                                                                                                                                                                                                                                                                                                                                                                                                                                                                                                                                                                                                                                                                                                                                                          |                                                                                                                                                                                                                                                                                                                                                                                                                                                                   |                                                                                                                                                                                                                                                                                                                                                                                                                                                                                                               |
| 16. TB Drug 16 (select one)                                                                                                                                                                                                                                                                                                                                                                                                                                       | <table border="1"> <tr> <td> <input type="checkbox"/> RHZE<br/> <input type="checkbox"/> RH<br/> <input type="checkbox"/> Rifampicin<br/> <input type="checkbox"/> Pyrazinamide<br/> <input type="checkbox"/> Isoniazid<br/> <input type="checkbox"/> Ethambutol<br/> <input type="checkbox"/> Streptomycin<br/> <input type="checkbox"/> Rifabutin<br/> <input type="checkbox"/> Amikacin<br/> <input type="checkbox"/> Kanamycin<br/> <input type="checkbox"/> Capreomycin<br/> <input type="checkbox"/> Ofloxacin </td> <td> <input type="checkbox"/> Levofloxacin<br/> <input type="checkbox"/> Moxifloxacin<br/> <input type="checkbox"/> Terizidone<br/> <input type="checkbox"/> Cycloserine<br/> <input type="checkbox"/> Ethionamide<br/> <input type="checkbox"/> Protionamide<br/> <input type="checkbox"/> Para-aminosalicylic acid (PAS)<br/> <input type="checkbox"/> Clofazimine<br/> <input type="checkbox"/> Linezolid<br/> <input type="checkbox"/> Imipenem<br/> <input type="checkbox"/> Bedaquiline<br/> <input type="checkbox"/> Other: _____ </td> </tr> </table> | <input type="checkbox"/> RHZE<br><input type="checkbox"/> RH<br><input type="checkbox"/> Rifampicin<br><input type="checkbox"/> Pyrazinamide<br><input type="checkbox"/> Isoniazid<br><input type="checkbox"/> Ethambutol<br><input type="checkbox"/> Streptomycin<br><input type="checkbox"/> Rifabutin<br><input type="checkbox"/> Amikacin<br><input type="checkbox"/> Kanamycin<br><input type="checkbox"/> Capreomycin<br><input type="checkbox"/> Ofloxacin | <input type="checkbox"/> Levofloxacin<br><input type="checkbox"/> Moxifloxacin<br><input type="checkbox"/> Terizidone<br><input type="checkbox"/> Cycloserine<br><input type="checkbox"/> Ethionamide<br><input type="checkbox"/> Protionamide<br><input type="checkbox"/> Para-aminosalicylic acid (PAS)<br><input type="checkbox"/> Clofazimine<br><input type="checkbox"/> Linezolid<br><input type="checkbox"/> Imipenem<br><input type="checkbox"/> Bedaquiline<br><input type="checkbox"/> Other: _____ |
| <input type="checkbox"/> RHZE<br><input type="checkbox"/> RH<br><input type="checkbox"/> Rifampicin<br><input type="checkbox"/> Pyrazinamide<br><input type="checkbox"/> Isoniazid<br><input type="checkbox"/> Ethambutol<br><input type="checkbox"/> Streptomycin<br><input type="checkbox"/> Rifabutin<br><input type="checkbox"/> Amikacin<br><input type="checkbox"/> Kanamycin<br><input type="checkbox"/> Capreomycin<br><input type="checkbox"/> Ofloxacin | <input type="checkbox"/> Levofloxacin<br><input type="checkbox"/> Moxifloxacin<br><input type="checkbox"/> Terizidone<br><input type="checkbox"/> Cycloserine<br><input type="checkbox"/> Ethionamide<br><input type="checkbox"/> Protionamide<br><input type="checkbox"/> Para-aminosalicylic acid (PAS)<br><input type="checkbox"/> Clofazimine<br><input type="checkbox"/> Linezolid<br><input type="checkbox"/> Imipenem<br><input type="checkbox"/> Bedaquiline<br><input type="checkbox"/> Other: _____                                                                                                                                                                                                                                                                                                                                                                                                                                                                                                                                                                            |                                                                                                                                                                                                                                                                                                                                                                                                                                                                   |                                                                                                                                                                                                                                                                                                                                                                                                                                                                                                               |
| 16a. If RHZE, combination:                                                                                                                                                                                                                                                                                                                                                                                                                                        | <input type="checkbox"/> RHZE 150/75/400/275 - 2 tablets<br><input type="checkbox"/> RHZE 150/75/400/275 - 3 tablets<br><input type="checkbox"/> RHZE 150/75/400/275 - 4 tablets<br><input type="checkbox"/> RHZE 150/75/400/275 - 5 tablets                                                                                                                                                                                                                                                                                                                                                                                                                                                                                                                                                                                                                                                                                                                                                                                                                                             |                                                                                                                                                                                                                                                                                                                                                                                                                                                                   |                                                                                                                                                                                                                                                                                                                                                                                                                                                                                                               |
| 16b. If RH, combination:                                                                                                                                                                                                                                                                                                                                                                                                                                          | <input type="checkbox"/> RH 150/75 - 2 tablets<br><input type="checkbox"/> RH 150/75 - 3 tablets<br><input type="checkbox"/> RH 150/75 - 4 tablets<br><input type="checkbox"/> RH 150/75 - 5 tablets<br><input type="checkbox"/> RH 300/200 - 1 tablet or capsule<br><input type="checkbox"/> RH 300/200 - 2 tablets or capsules<br><input type="checkbox"/> RH 300/200 - 1 tablet or capsule + RH 150/100 - 1 tablet<br><input type="checkbox"/> RH 300/200 - 2 tablets or capsules + RH 150/100 - 1 tablet                                                                                                                                                                                                                                                                                                                                                                                                                                                                                                                                                                             |                                                                                                                                                                                                                                                                                                                                                                                                                                                                   |                                                                                                                                                                                                                                                                                                                                                                                                                                                                                                               |
| 16c. Other drugs - Dose (mg)                                                                                                                                                                                                                                                                                                                                                                                                                                      | _ _ _ _                                                                                                                                                                                                                                                                                                                                                                                                                                                                                                                                                                                                                                                                                                                                                                                                                                                                                                                                                                                                                                                                                  |                                                                                                                                                                                                                                                                                                                                                                                                                                                                   |                                                                                                                                                                                                                                                                                                                                                                                                                                                                                                               |
| 16d. How many times a day is this medication prescribed?                                                                                                                                                                                                                                                                                                                                                                                                          | _ _ _                                                                                                                                                                                                                                                                                                                                                                                                                                                                                                                                                                                                                                                                                                                                                                                                                                                                                                                                                                                                                                                                                    |                                                                                                                                                                                                                                                                                                                                                                                                                                                                   |                                                                                                                                                                                                                                                                                                                                                                                                                                                                                                               |



## IeDEA TB SRN

|                                                          |                                                                                                                                                                                                                                                                                                                                                                                                                                                                                                                                                                                                                                                                                                                                                                                                                                                                                                                                                                                                                                                                                                                                                                                                                                                                                                       |                               |                                       |                             |                                       |                                     |                                     |                                       |                                      |                                    |                                      |                                     |                                       |                                       |                                                         |                                    |                                      |                                   |                                    |                                    |                                   |                                      |                                      |                                    |                                       |
|----------------------------------------------------------|-------------------------------------------------------------------------------------------------------------------------------------------------------------------------------------------------------------------------------------------------------------------------------------------------------------------------------------------------------------------------------------------------------------------------------------------------------------------------------------------------------------------------------------------------------------------------------------------------------------------------------------------------------------------------------------------------------------------------------------------------------------------------------------------------------------------------------------------------------------------------------------------------------------------------------------------------------------------------------------------------------------------------------------------------------------------------------------------------------------------------------------------------------------------------------------------------------------------------------------------------------------------------------------------------------|-------------------------------|---------------------------------------|-----------------------------|---------------------------------------|-------------------------------------|-------------------------------------|---------------------------------------|--------------------------------------|------------------------------------|--------------------------------------|-------------------------------------|---------------------------------------|---------------------------------------|---------------------------------------------------------|------------------------------------|--------------------------------------|-----------------------------------|------------------------------------|------------------------------------|-----------------------------------|--------------------------------------|--------------------------------------|------------------------------------|---------------------------------------|
| 16e. How many days a week is this medication prescribed? | _ _ _                                                                                                                                                                                                                                                                                                                                                                                                                                                                                                                                                                                                                                                                                                                                                                                                                                                                                                                                                                                                                                                                                                                                                                                                                                                                                                 |                               |                                       |                             |                                       |                                     |                                     |                                       |                                      |                                    |                                      |                                     |                                       |                                       |                                                         |                                    |                                      |                                   |                                    |                                    |                                   |                                      |                                      |                                    |                                       |
| 16f. Start Date                                          | _ _ / _ _ / _ _ _ _  (dd/mm/yyyy)                                                                                                                                                                                                                                                                                                                                                                                                                                                                                                                                                                                                                                                                                                                                                                                                                                                                                                                                                                                                                                                                                                                                                                                                                                                                     |                               |                                       |                             |                                       |                                     |                                     |                                       |                                      |                                    |                                      |                                     |                                       |                                       |                                                         |                                    |                                      |                                   |                                    |                                    |                                   |                                      |                                      |                                    |                                       |
| 16g. Stop Date                                           | _ _ / _ _ / _ _ _ _  (dd/mm/yyyy)<br><input type="checkbox"/> Treatment Ongoing ( <i>Return to update the status at next visit. Update stop date and reason once medication is stopped.</i> )<br><input type="checkbox"/> Unknown                                                                                                                                                                                                                                                                                                                                                                                                                                                                                                                                                                                                                                                                                                                                                                                                                                                                                                                                                                                                                                                                     |                               |                                       |                             |                                       |                                     |                                     |                                       |                                      |                                    |                                      |                                     |                                       |                                       |                                                         |                                    |                                      |                                   |                                    |                                    |                                   |                                      |                                      |                                    |                                       |
| 16h. Reason for change, interruption or completion       | <input type="checkbox"/> Completed intensive phase<br><input type="checkbox"/> Completed continuation phase<br><input type="checkbox"/> TB treatment failure<br><input type="checkbox"/> Drug resistance<br><input type="checkbox"/> Pregnancy<br><input type="checkbox"/> Side effects or toxicity<br><input type="checkbox"/> Incompatibility with ART (antiretroviral treatment)<br><input type="checkbox"/> Drug interaction<br><input type="checkbox"/> Participant stopped taking the meds<br><input type="checkbox"/> Lost to follow up<br><input type="checkbox"/> Dose adjustment (e.g. for weight change)<br><input type="checkbox"/> Death<br><input type="checkbox"/> Other _____<br><input type="checkbox"/> Unknown                                                                                                                                                                                                                                                                                                                                                                                                                                                                                                                                                                     |                               |                                       |                             |                                       |                                     |                                     |                                       |                                      |                                    |                                      |                                     |                                       |                                       |                                                         |                                    |                                      |                                   |                                    |                                    |                                   |                                      |                                      |                                    |                                       |
| <b>TB Drug 17</b>                                        |                                                                                                                                                                                                                                                                                                                                                                                                                                                                                                                                                                                                                                                                                                                                                                                                                                                                                                                                                                                                                                                                                                                                                                                                                                                                                                       |                               |                                       |                             |                                       |                                     |                                     |                                       |                                      |                                    |                                      |                                     |                                       |                                       |                                                         |                                    |                                      |                                   |                                    |                                    |                                   |                                      |                                      |                                    |                                       |
| 17. TB Drug 17<br>(Select one)                           | <table border="1"> <tr> <td><input type="checkbox"/> RHZE</td> <td><input type="checkbox"/> Levofloxacin</td> </tr> <tr> <td><input type="checkbox"/> RH</td> <td><input type="checkbox"/> Moxifloxacin</td> </tr> <tr> <td><input type="checkbox"/> Rifampicin</td> <td><input type="checkbox"/> Terizidone</td> </tr> <tr> <td><input type="checkbox"/> Pyrazinamide</td> <td><input type="checkbox"/> Cycloserine</td> </tr> <tr> <td><input type="checkbox"/> Isoniazid</td> <td><input type="checkbox"/> Ethionamide</td> </tr> <tr> <td><input type="checkbox"/> Ethambutol</td> <td><input type="checkbox"/> Protionamide</td> </tr> <tr> <td><input type="checkbox"/> Streptomycin</td> <td><input type="checkbox"/> Para-aminosalicylic acid (PAS)</td> </tr> <tr> <td><input type="checkbox"/> Rifabutin</td> <td><input type="checkbox"/> Clofazimine</td> </tr> <tr> <td><input type="checkbox"/> Amikacin</td> <td><input type="checkbox"/> Linezolid</td> </tr> <tr> <td><input type="checkbox"/> Kanamycin</td> <td><input type="checkbox"/> Imipenem</td> </tr> <tr> <td><input type="checkbox"/> Capreomycin</td> <td><input type="checkbox"/> Bedaquiline</td> </tr> <tr> <td><input type="checkbox"/> Ofloxacin</td> <td><input type="checkbox"/> Other: _____</td> </tr> </table> | <input type="checkbox"/> RHZE | <input type="checkbox"/> Levofloxacin | <input type="checkbox"/> RH | <input type="checkbox"/> Moxifloxacin | <input type="checkbox"/> Rifampicin | <input type="checkbox"/> Terizidone | <input type="checkbox"/> Pyrazinamide | <input type="checkbox"/> Cycloserine | <input type="checkbox"/> Isoniazid | <input type="checkbox"/> Ethionamide | <input type="checkbox"/> Ethambutol | <input type="checkbox"/> Protionamide | <input type="checkbox"/> Streptomycin | <input type="checkbox"/> Para-aminosalicylic acid (PAS) | <input type="checkbox"/> Rifabutin | <input type="checkbox"/> Clofazimine | <input type="checkbox"/> Amikacin | <input type="checkbox"/> Linezolid | <input type="checkbox"/> Kanamycin | <input type="checkbox"/> Imipenem | <input type="checkbox"/> Capreomycin | <input type="checkbox"/> Bedaquiline | <input type="checkbox"/> Ofloxacin | <input type="checkbox"/> Other: _____ |
| <input type="checkbox"/> RHZE                            | <input type="checkbox"/> Levofloxacin                                                                                                                                                                                                                                                                                                                                                                                                                                                                                                                                                                                                                                                                                                                                                                                                                                                                                                                                                                                                                                                                                                                                                                                                                                                                 |                               |                                       |                             |                                       |                                     |                                     |                                       |                                      |                                    |                                      |                                     |                                       |                                       |                                                         |                                    |                                      |                                   |                                    |                                    |                                   |                                      |                                      |                                    |                                       |
| <input type="checkbox"/> RH                              | <input type="checkbox"/> Moxifloxacin                                                                                                                                                                                                                                                                                                                                                                                                                                                                                                                                                                                                                                                                                                                                                                                                                                                                                                                                                                                                                                                                                                                                                                                                                                                                 |                               |                                       |                             |                                       |                                     |                                     |                                       |                                      |                                    |                                      |                                     |                                       |                                       |                                                         |                                    |                                      |                                   |                                    |                                    |                                   |                                      |                                      |                                    |                                       |
| <input type="checkbox"/> Rifampicin                      | <input type="checkbox"/> Terizidone                                                                                                                                                                                                                                                                                                                                                                                                                                                                                                                                                                                                                                                                                                                                                                                                                                                                                                                                                                                                                                                                                                                                                                                                                                                                   |                               |                                       |                             |                                       |                                     |                                     |                                       |                                      |                                    |                                      |                                     |                                       |                                       |                                                         |                                    |                                      |                                   |                                    |                                    |                                   |                                      |                                      |                                    |                                       |
| <input type="checkbox"/> Pyrazinamide                    | <input type="checkbox"/> Cycloserine                                                                                                                                                                                                                                                                                                                                                                                                                                                                                                                                                                                                                                                                                                                                                                                                                                                                                                                                                                                                                                                                                                                                                                                                                                                                  |                               |                                       |                             |                                       |                                     |                                     |                                       |                                      |                                    |                                      |                                     |                                       |                                       |                                                         |                                    |                                      |                                   |                                    |                                    |                                   |                                      |                                      |                                    |                                       |
| <input type="checkbox"/> Isoniazid                       | <input type="checkbox"/> Ethionamide                                                                                                                                                                                                                                                                                                                                                                                                                                                                                                                                                                                                                                                                                                                                                                                                                                                                                                                                                                                                                                                                                                                                                                                                                                                                  |                               |                                       |                             |                                       |                                     |                                     |                                       |                                      |                                    |                                      |                                     |                                       |                                       |                                                         |                                    |                                      |                                   |                                    |                                    |                                   |                                      |                                      |                                    |                                       |
| <input type="checkbox"/> Ethambutol                      | <input type="checkbox"/> Protionamide                                                                                                                                                                                                                                                                                                                                                                                                                                                                                                                                                                                                                                                                                                                                                                                                                                                                                                                                                                                                                                                                                                                                                                                                                                                                 |                               |                                       |                             |                                       |                                     |                                     |                                       |                                      |                                    |                                      |                                     |                                       |                                       |                                                         |                                    |                                      |                                   |                                    |                                    |                                   |                                      |                                      |                                    |                                       |
| <input type="checkbox"/> Streptomycin                    | <input type="checkbox"/> Para-aminosalicylic acid (PAS)                                                                                                                                                                                                                                                                                                                                                                                                                                                                                                                                                                                                                                                                                                                                                                                                                                                                                                                                                                                                                                                                                                                                                                                                                                               |                               |                                       |                             |                                       |                                     |                                     |                                       |                                      |                                    |                                      |                                     |                                       |                                       |                                                         |                                    |                                      |                                   |                                    |                                    |                                   |                                      |                                      |                                    |                                       |
| <input type="checkbox"/> Rifabutin                       | <input type="checkbox"/> Clofazimine                                                                                                                                                                                                                                                                                                                                                                                                                                                                                                                                                                                                                                                                                                                                                                                                                                                                                                                                                                                                                                                                                                                                                                                                                                                                  |                               |                                       |                             |                                       |                                     |                                     |                                       |                                      |                                    |                                      |                                     |                                       |                                       |                                                         |                                    |                                      |                                   |                                    |                                    |                                   |                                      |                                      |                                    |                                       |
| <input type="checkbox"/> Amikacin                        | <input type="checkbox"/> Linezolid                                                                                                                                                                                                                                                                                                                                                                                                                                                                                                                                                                                                                                                                                                                                                                                                                                                                                                                                                                                                                                                                                                                                                                                                                                                                    |                               |                                       |                             |                                       |                                     |                                     |                                       |                                      |                                    |                                      |                                     |                                       |                                       |                                                         |                                    |                                      |                                   |                                    |                                    |                                   |                                      |                                      |                                    |                                       |
| <input type="checkbox"/> Kanamycin                       | <input type="checkbox"/> Imipenem                                                                                                                                                                                                                                                                                                                                                                                                                                                                                                                                                                                                                                                                                                                                                                                                                                                                                                                                                                                                                                                                                                                                                                                                                                                                     |                               |                                       |                             |                                       |                                     |                                     |                                       |                                      |                                    |                                      |                                     |                                       |                                       |                                                         |                                    |                                      |                                   |                                    |                                    |                                   |                                      |                                      |                                    |                                       |
| <input type="checkbox"/> Capreomycin                     | <input type="checkbox"/> Bedaquiline                                                                                                                                                                                                                                                                                                                                                                                                                                                                                                                                                                                                                                                                                                                                                                                                                                                                                                                                                                                                                                                                                                                                                                                                                                                                  |                               |                                       |                             |                                       |                                     |                                     |                                       |                                      |                                    |                                      |                                     |                                       |                                       |                                                         |                                    |                                      |                                   |                                    |                                    |                                   |                                      |                                      |                                    |                                       |
| <input type="checkbox"/> Ofloxacin                       | <input type="checkbox"/> Other: _____                                                                                                                                                                                                                                                                                                                                                                                                                                                                                                                                                                                                                                                                                                                                                                                                                                                                                                                                                                                                                                                                                                                                                                                                                                                                 |                               |                                       |                             |                                       |                                     |                                     |                                       |                                      |                                    |                                      |                                     |                                       |                                       |                                                         |                                    |                                      |                                   |                                    |                                    |                                   |                                      |                                      |                                    |                                       |
| 17a. If RHZE, combination:                               | <input type="checkbox"/> RHZE 150/75/400/275 - 2 tablets<br><input type="checkbox"/> RHZE 150/75/400/275 - 3 tablets<br><input type="checkbox"/> RHZE 150/75/400/275 - 4 tablets<br><input type="checkbox"/> RHZE 150/75/400/275 - 5 tablets                                                                                                                                                                                                                                                                                                                                                                                                                                                                                                                                                                                                                                                                                                                                                                                                                                                                                                                                                                                                                                                          |                               |                                       |                             |                                       |                                     |                                     |                                       |                                      |                                    |                                      |                                     |                                       |                                       |                                                         |                                    |                                      |                                   |                                    |                                    |                                   |                                      |                                      |                                    |                                       |
| 17b. If RH, combination:                                 | <input type="checkbox"/> RH 150/75 - 2 tablets<br><input type="checkbox"/> RH 150/75 - 3 tablets<br><input type="checkbox"/> RH 150/75 - 4 tablets<br><input type="checkbox"/> RH 150/75 - 5 tablets<br><input type="checkbox"/> RH 300/200 - 1 tablet or capsule<br><input type="checkbox"/> RH 300/200 - 2 tablets or capsules<br><input type="checkbox"/> RH 300/200 - 1 tablet or capsule + RH 150/100 - 1 tablet                                                                                                                                                                                                                                                                                                                                                                                                                                                                                                                                                                                                                                                                                                                                                                                                                                                                                 |                               |                                       |                             |                                       |                                     |                                     |                                       |                                      |                                    |                                      |                                     |                                       |                                       |                                                         |                                    |                                      |                                   |                                    |                                    |                                   |                                      |                                      |                                    |                                       |

## leDEA TB SRN

|                                                          |                                                                                                                                                                                                                                                                                                                                                                                                                                                                                                                                                                                                                                                                                                                                                                                                                                                                                                                                                                                                                                                                                                                                                                                                                                                                                                       |                               |                                       |                             |                                       |                                     |                                     |                                       |                                      |                                    |                                      |                                     |                                       |                                       |                                                         |                                    |                                      |                                   |                                    |                                    |                                   |                                      |                                      |                                    |                                       |
|----------------------------------------------------------|-------------------------------------------------------------------------------------------------------------------------------------------------------------------------------------------------------------------------------------------------------------------------------------------------------------------------------------------------------------------------------------------------------------------------------------------------------------------------------------------------------------------------------------------------------------------------------------------------------------------------------------------------------------------------------------------------------------------------------------------------------------------------------------------------------------------------------------------------------------------------------------------------------------------------------------------------------------------------------------------------------------------------------------------------------------------------------------------------------------------------------------------------------------------------------------------------------------------------------------------------------------------------------------------------------|-------------------------------|---------------------------------------|-----------------------------|---------------------------------------|-------------------------------------|-------------------------------------|---------------------------------------|--------------------------------------|------------------------------------|--------------------------------------|-------------------------------------|---------------------------------------|---------------------------------------|---------------------------------------------------------|------------------------------------|--------------------------------------|-----------------------------------|------------------------------------|------------------------------------|-----------------------------------|--------------------------------------|--------------------------------------|------------------------------------|---------------------------------------|
|                                                          | <input type="checkbox"/> RH 300/200 - 2 tablets or capsules + RH 150/100 - 1 tablet                                                                                                                                                                                                                                                                                                                                                                                                                                                                                                                                                                                                                                                                                                                                                                                                                                                                                                                                                                                                                                                                                                                                                                                                                   |                               |                                       |                             |                                       |                                     |                                     |                                       |                                      |                                    |                                      |                                     |                                       |                                       |                                                         |                                    |                                      |                                   |                                    |                                    |                                   |                                      |                                      |                                    |                                       |
| 17c. Other drugs - Dose (mg)                             | _ _ _ _                                                                                                                                                                                                                                                                                                                                                                                                                                                                                                                                                                                                                                                                                                                                                                                                                                                                                                                                                                                                                                                                                                                                                                                                                                                                                               |                               |                                       |                             |                                       |                                     |                                     |                                       |                                      |                                    |                                      |                                     |                                       |                                       |                                                         |                                    |                                      |                                   |                                    |                                    |                                   |                                      |                                      |                                    |                                       |
| 17d. How many times a day is this medication prescribed? | _ _ _                                                                                                                                                                                                                                                                                                                                                                                                                                                                                                                                                                                                                                                                                                                                                                                                                                                                                                                                                                                                                                                                                                                                                                                                                                                                                                 |                               |                                       |                             |                                       |                                     |                                     |                                       |                                      |                                    |                                      |                                     |                                       |                                       |                                                         |                                    |                                      |                                   |                                    |                                    |                                   |                                      |                                      |                                    |                                       |
| 17e. How many days a week is this medication prescribed? | _ _ _                                                                                                                                                                                                                                                                                                                                                                                                                                                                                                                                                                                                                                                                                                                                                                                                                                                                                                                                                                                                                                                                                                                                                                                                                                                                                                 |                               |                                       |                             |                                       |                                     |                                     |                                       |                                      |                                    |                                      |                                     |                                       |                                       |                                                         |                                    |                                      |                                   |                                    |                                    |                                   |                                      |                                      |                                    |                                       |
| 17f. Start Date                                          | _ _ / _ _ / _ _ _ _  (dd/mm/yyyy)                                                                                                                                                                                                                                                                                                                                                                                                                                                                                                                                                                                                                                                                                                                                                                                                                                                                                                                                                                                                                                                                                                                                                                                                                                                                     |                               |                                       |                             |                                       |                                     |                                     |                                       |                                      |                                    |                                      |                                     |                                       |                                       |                                                         |                                    |                                      |                                   |                                    |                                    |                                   |                                      |                                      |                                    |                                       |
| 17g. Stop Date                                           | _ _ / _ _ / _ _ _ _  (dd/mm/yyyy)<br><input type="checkbox"/> Treatment Ongoing ( <i>Return to update the status at next visit. Update stop date and reason once medication is stopped.</i> )<br><input type="checkbox"/> Unknown                                                                                                                                                                                                                                                                                                                                                                                                                                                                                                                                                                                                                                                                                                                                                                                                                                                                                                                                                                                                                                                                     |                               |                                       |                             |                                       |                                     |                                     |                                       |                                      |                                    |                                      |                                     |                                       |                                       |                                                         |                                    |                                      |                                   |                                    |                                    |                                   |                                      |                                      |                                    |                                       |
| 17h. Reason for change, interruption or completion       | <input type="checkbox"/> Completed intensive phase<br><input type="checkbox"/> Completed continuation phase<br><input type="checkbox"/> TB treatment failure<br><input type="checkbox"/> Drug resistance<br><input type="checkbox"/> Pregnancy<br><input type="checkbox"/> Side effects or toxicity<br><input type="checkbox"/> Incompatibility with ART (antiretroviral treatment)<br><input type="checkbox"/> Drug interaction<br><input type="checkbox"/> Participant stopped taking the meds<br><input type="checkbox"/> Lost to follow up<br><input type="checkbox"/> Dose adjustment (e.g. for weight change)<br><input type="checkbox"/> Death<br><input type="checkbox"/> Other _____<br><input type="checkbox"/> Unknown                                                                                                                                                                                                                                                                                                                                                                                                                                                                                                                                                                     |                               |                                       |                             |                                       |                                     |                                     |                                       |                                      |                                    |                                      |                                     |                                       |                                       |                                                         |                                    |                                      |                                   |                                    |                                    |                                   |                                      |                                      |                                    |                                       |
| <b>TB Drug 18</b>                                        |                                                                                                                                                                                                                                                                                                                                                                                                                                                                                                                                                                                                                                                                                                                                                                                                                                                                                                                                                                                                                                                                                                                                                                                                                                                                                                       |                               |                                       |                             |                                       |                                     |                                     |                                       |                                      |                                    |                                      |                                     |                                       |                                       |                                                         |                                    |                                      |                                   |                                    |                                    |                                   |                                      |                                      |                                    |                                       |
| 18. TB Drug 18<br>(Select one)                           | <table border="1"> <tr> <td><input type="checkbox"/> RHZE</td> <td><input type="checkbox"/> Levofloxacin</td> </tr> <tr> <td><input type="checkbox"/> RH</td> <td><input type="checkbox"/> Moxifloxacin</td> </tr> <tr> <td><input type="checkbox"/> Rifampicin</td> <td><input type="checkbox"/> Terizidone</td> </tr> <tr> <td><input type="checkbox"/> Pyrazinamide</td> <td><input type="checkbox"/> Cycloserine</td> </tr> <tr> <td><input type="checkbox"/> Isoniazid</td> <td><input type="checkbox"/> Ethionamide</td> </tr> <tr> <td><input type="checkbox"/> Ethambutol</td> <td><input type="checkbox"/> Protionamide</td> </tr> <tr> <td><input type="checkbox"/> Streptomycin</td> <td><input type="checkbox"/> Para-aminosalicylic acid (PAS)</td> </tr> <tr> <td><input type="checkbox"/> Rifabutin</td> <td><input type="checkbox"/> Clofazimine</td> </tr> <tr> <td><input type="checkbox"/> Amikacin</td> <td><input type="checkbox"/> Linezolid</td> </tr> <tr> <td><input type="checkbox"/> Kanamycin</td> <td><input type="checkbox"/> Imipenem</td> </tr> <tr> <td><input type="checkbox"/> Capreomycin</td> <td><input type="checkbox"/> Bedaquiline</td> </tr> <tr> <td><input type="checkbox"/> Ofloxacin</td> <td><input type="checkbox"/> Other: _____</td> </tr> </table> | <input type="checkbox"/> RHZE | <input type="checkbox"/> Levofloxacin | <input type="checkbox"/> RH | <input type="checkbox"/> Moxifloxacin | <input type="checkbox"/> Rifampicin | <input type="checkbox"/> Terizidone | <input type="checkbox"/> Pyrazinamide | <input type="checkbox"/> Cycloserine | <input type="checkbox"/> Isoniazid | <input type="checkbox"/> Ethionamide | <input type="checkbox"/> Ethambutol | <input type="checkbox"/> Protionamide | <input type="checkbox"/> Streptomycin | <input type="checkbox"/> Para-aminosalicylic acid (PAS) | <input type="checkbox"/> Rifabutin | <input type="checkbox"/> Clofazimine | <input type="checkbox"/> Amikacin | <input type="checkbox"/> Linezolid | <input type="checkbox"/> Kanamycin | <input type="checkbox"/> Imipenem | <input type="checkbox"/> Capreomycin | <input type="checkbox"/> Bedaquiline | <input type="checkbox"/> Ofloxacin | <input type="checkbox"/> Other: _____ |
| <input type="checkbox"/> RHZE                            | <input type="checkbox"/> Levofloxacin                                                                                                                                                                                                                                                                                                                                                                                                                                                                                                                                                                                                                                                                                                                                                                                                                                                                                                                                                                                                                                                                                                                                                                                                                                                                 |                               |                                       |                             |                                       |                                     |                                     |                                       |                                      |                                    |                                      |                                     |                                       |                                       |                                                         |                                    |                                      |                                   |                                    |                                    |                                   |                                      |                                      |                                    |                                       |
| <input type="checkbox"/> RH                              | <input type="checkbox"/> Moxifloxacin                                                                                                                                                                                                                                                                                                                                                                                                                                                                                                                                                                                                                                                                                                                                                                                                                                                                                                                                                                                                                                                                                                                                                                                                                                                                 |                               |                                       |                             |                                       |                                     |                                     |                                       |                                      |                                    |                                      |                                     |                                       |                                       |                                                         |                                    |                                      |                                   |                                    |                                    |                                   |                                      |                                      |                                    |                                       |
| <input type="checkbox"/> Rifampicin                      | <input type="checkbox"/> Terizidone                                                                                                                                                                                                                                                                                                                                                                                                                                                                                                                                                                                                                                                                                                                                                                                                                                                                                                                                                                                                                                                                                                                                                                                                                                                                   |                               |                                       |                             |                                       |                                     |                                     |                                       |                                      |                                    |                                      |                                     |                                       |                                       |                                                         |                                    |                                      |                                   |                                    |                                    |                                   |                                      |                                      |                                    |                                       |
| <input type="checkbox"/> Pyrazinamide                    | <input type="checkbox"/> Cycloserine                                                                                                                                                                                                                                                                                                                                                                                                                                                                                                                                                                                                                                                                                                                                                                                                                                                                                                                                                                                                                                                                                                                                                                                                                                                                  |                               |                                       |                             |                                       |                                     |                                     |                                       |                                      |                                    |                                      |                                     |                                       |                                       |                                                         |                                    |                                      |                                   |                                    |                                    |                                   |                                      |                                      |                                    |                                       |
| <input type="checkbox"/> Isoniazid                       | <input type="checkbox"/> Ethionamide                                                                                                                                                                                                                                                                                                                                                                                                                                                                                                                                                                                                                                                                                                                                                                                                                                                                                                                                                                                                                                                                                                                                                                                                                                                                  |                               |                                       |                             |                                       |                                     |                                     |                                       |                                      |                                    |                                      |                                     |                                       |                                       |                                                         |                                    |                                      |                                   |                                    |                                    |                                   |                                      |                                      |                                    |                                       |
| <input type="checkbox"/> Ethambutol                      | <input type="checkbox"/> Protionamide                                                                                                                                                                                                                                                                                                                                                                                                                                                                                                                                                                                                                                                                                                                                                                                                                                                                                                                                                                                                                                                                                                                                                                                                                                                                 |                               |                                       |                             |                                       |                                     |                                     |                                       |                                      |                                    |                                      |                                     |                                       |                                       |                                                         |                                    |                                      |                                   |                                    |                                    |                                   |                                      |                                      |                                    |                                       |
| <input type="checkbox"/> Streptomycin                    | <input type="checkbox"/> Para-aminosalicylic acid (PAS)                                                                                                                                                                                                                                                                                                                                                                                                                                                                                                                                                                                                                                                                                                                                                                                                                                                                                                                                                                                                                                                                                                                                                                                                                                               |                               |                                       |                             |                                       |                                     |                                     |                                       |                                      |                                    |                                      |                                     |                                       |                                       |                                                         |                                    |                                      |                                   |                                    |                                    |                                   |                                      |                                      |                                    |                                       |
| <input type="checkbox"/> Rifabutin                       | <input type="checkbox"/> Clofazimine                                                                                                                                                                                                                                                                                                                                                                                                                                                                                                                                                                                                                                                                                                                                                                                                                                                                                                                                                                                                                                                                                                                                                                                                                                                                  |                               |                                       |                             |                                       |                                     |                                     |                                       |                                      |                                    |                                      |                                     |                                       |                                       |                                                         |                                    |                                      |                                   |                                    |                                    |                                   |                                      |                                      |                                    |                                       |
| <input type="checkbox"/> Amikacin                        | <input type="checkbox"/> Linezolid                                                                                                                                                                                                                                                                                                                                                                                                                                                                                                                                                                                                                                                                                                                                                                                                                                                                                                                                                                                                                                                                                                                                                                                                                                                                    |                               |                                       |                             |                                       |                                     |                                     |                                       |                                      |                                    |                                      |                                     |                                       |                                       |                                                         |                                    |                                      |                                   |                                    |                                    |                                   |                                      |                                      |                                    |                                       |
| <input type="checkbox"/> Kanamycin                       | <input type="checkbox"/> Imipenem                                                                                                                                                                                                                                                                                                                                                                                                                                                                                                                                                                                                                                                                                                                                                                                                                                                                                                                                                                                                                                                                                                                                                                                                                                                                     |                               |                                       |                             |                                       |                                     |                                     |                                       |                                      |                                    |                                      |                                     |                                       |                                       |                                                         |                                    |                                      |                                   |                                    |                                    |                                   |                                      |                                      |                                    |                                       |
| <input type="checkbox"/> Capreomycin                     | <input type="checkbox"/> Bedaquiline                                                                                                                                                                                                                                                                                                                                                                                                                                                                                                                                                                                                                                                                                                                                                                                                                                                                                                                                                                                                                                                                                                                                                                                                                                                                  |                               |                                       |                             |                                       |                                     |                                     |                                       |                                      |                                    |                                      |                                     |                                       |                                       |                                                         |                                    |                                      |                                   |                                    |                                    |                                   |                                      |                                      |                                    |                                       |
| <input type="checkbox"/> Ofloxacin                       | <input type="checkbox"/> Other: _____                                                                                                                                                                                                                                                                                                                                                                                                                                                                                                                                                                                                                                                                                                                                                                                                                                                                                                                                                                                                                                                                                                                                                                                                                                                                 |                               |                                       |                             |                                       |                                     |                                     |                                       |                                      |                                    |                                      |                                     |                                       |                                       |                                                         |                                    |                                      |                                   |                                    |                                    |                                   |                                      |                                      |                                    |                                       |
| 18a. If RHZE, combination:                               | <input type="checkbox"/> RHZE 150/75/400/275 - 2 tablets<br><input type="checkbox"/> RHZE 150/75/400/275 - 3 tablets                                                                                                                                                                                                                                                                                                                                                                                                                                                                                                                                                                                                                                                                                                                                                                                                                                                                                                                                                                                                                                                                                                                                                                                  |                               |                                       |                             |                                       |                                     |                                     |                                       |                                      |                                    |                                      |                                     |                                       |                                       |                                                         |                                    |                                      |                                   |                                    |                                    |                                   |                                      |                                      |                                    |                                       |

## IeDEA TB SRN

|                                                          |                                                                                                                                                                                                                                                                                                                                                                                                                                                                                                                                                                                                                                                                                                                                                                                                                                                                                       |  |                               |                                       |                             |                                       |                                     |                                     |                                       |                                      |                                    |                                      |                                     |                                        |                                       |                                                         |                                    |                                      |
|----------------------------------------------------------|---------------------------------------------------------------------------------------------------------------------------------------------------------------------------------------------------------------------------------------------------------------------------------------------------------------------------------------------------------------------------------------------------------------------------------------------------------------------------------------------------------------------------------------------------------------------------------------------------------------------------------------------------------------------------------------------------------------------------------------------------------------------------------------------------------------------------------------------------------------------------------------|--|-------------------------------|---------------------------------------|-----------------------------|---------------------------------------|-------------------------------------|-------------------------------------|---------------------------------------|--------------------------------------|------------------------------------|--------------------------------------|-------------------------------------|----------------------------------------|---------------------------------------|---------------------------------------------------------|------------------------------------|--------------------------------------|
|                                                          | <input type="checkbox"/> RHZE 150/75/400/275 - 4 tablets<br><input type="checkbox"/> RHZE 150/75/400/275 - 5 tablets                                                                                                                                                                                                                                                                                                                                                                                                                                                                                                                                                                                                                                                                                                                                                                  |  |                               |                                       |                             |                                       |                                     |                                     |                                       |                                      |                                    |                                      |                                     |                                        |                                       |                                                         |                                    |                                      |
| 18b. If RH, combination:                                 | <input type="checkbox"/> RH 150/75 - 2 tablets<br><input type="checkbox"/> RH 150/75 - 3 tablets<br><input type="checkbox"/> RH 150/75 - 4 tablets<br><input type="checkbox"/> RH 150/75 - 5 tablets<br><input type="checkbox"/> RH 300/200 - 1 tablet or capsule<br><input type="checkbox"/> RH 300/200 - 2 tablets or capsules<br><input type="checkbox"/> RH 300/200 - 1 tablet or capsule + RH 150/100 - 1 tablet<br><input type="checkbox"/> RH 300/200 - 2 tablets or capsules + RH 150/100 - 1 tablet                                                                                                                                                                                                                                                                                                                                                                          |  |                               |                                       |                             |                                       |                                     |                                     |                                       |                                      |                                    |                                      |                                     |                                        |                                       |                                                         |                                    |                                      |
| 18c. Other drugs - Dose (mg)                             | _ _ _ _                                                                                                                                                                                                                                                                                                                                                                                                                                                                                                                                                                                                                                                                                                                                                                                                                                                                               |  |                               |                                       |                             |                                       |                                     |                                     |                                       |                                      |                                    |                                      |                                     |                                        |                                       |                                                         |                                    |                                      |
| 18d. How many times a day is this medication prescribed? | _ _ _                                                                                                                                                                                                                                                                                                                                                                                                                                                                                                                                                                                                                                                                                                                                                                                                                                                                                 |  |                               |                                       |                             |                                       |                                     |                                     |                                       |                                      |                                    |                                      |                                     |                                        |                                       |                                                         |                                    |                                      |
| 18e. How many days a week is this medication prescribed? | _ _ _                                                                                                                                                                                                                                                                                                                                                                                                                                                                                                                                                                                                                                                                                                                                                                                                                                                                                 |  |                               |                                       |                             |                                       |                                     |                                     |                                       |                                      |                                    |                                      |                                     |                                        |                                       |                                                         |                                    |                                      |
| 18f. Start Date                                          | _ _ / _ _ / _ _ _ _  (dd/mm/yyyy)                                                                                                                                                                                                                                                                                                                                                                                                                                                                                                                                                                                                                                                                                                                                                                                                                                                     |  |                               |                                       |                             |                                       |                                     |                                     |                                       |                                      |                                    |                                      |                                     |                                        |                                       |                                                         |                                    |                                      |
| 18g. Stop Date                                           | _ _ / _ _ / _ _ _ _  (dd/mm/yyyy)<br><input type="checkbox"/> Treatment Ongoing ( <i>return to update the status at next visit. Update stop date and reason once medication is stopped.</i> )<br><input type="checkbox"/> Unknown                                                                                                                                                                                                                                                                                                                                                                                                                                                                                                                                                                                                                                                     |  |                               |                                       |                             |                                       |                                     |                                     |                                       |                                      |                                    |                                      |                                     |                                        |                                       |                                                         |                                    |                                      |
| 18h. Reason for change, interruption or completion       | <input type="checkbox"/> Completed intensive phase<br><input type="checkbox"/> Completed continuation phase<br><input type="checkbox"/> TB treatment failure<br><input type="checkbox"/> Drug resistance<br><input type="checkbox"/> Pregnancy<br><input type="checkbox"/> Side effects or toxicity<br><input type="checkbox"/> Incompatibility with ART (antiretroviral treatment)<br><input type="checkbox"/> Drug interaction<br><input type="checkbox"/> Participant stopped taking the meds<br><input type="checkbox"/> Lost to follow up<br><input type="checkbox"/> Dose adjustment (e.g. for weight change)<br><input type="checkbox"/> Death<br><input type="checkbox"/> Other _____<br><input type="checkbox"/> Unknown                                                                                                                                                     |  |                               |                                       |                             |                                       |                                     |                                     |                                       |                                      |                                    |                                      |                                     |                                        |                                       |                                                         |                                    |                                      |
| <b>TB Drug 19</b>                                        |                                                                                                                                                                                                                                                                                                                                                                                                                                                                                                                                                                                                                                                                                                                                                                                                                                                                                       |  |                               |                                       |                             |                                       |                                     |                                     |                                       |                                      |                                    |                                      |                                     |                                        |                                       |                                                         |                                    |                                      |
| 19. TB Drug 19 (select one)                              | <table border="1"> <tr> <td><input type="checkbox"/> RHZE</td> <td><input type="checkbox"/> Levofloxacin</td> </tr> <tr> <td><input type="checkbox"/> RH</td> <td><input type="checkbox"/> Moxifloxacin</td> </tr> <tr> <td><input type="checkbox"/> Rifampicin</td> <td><input type="checkbox"/> Terizidone</td> </tr> <tr> <td><input type="checkbox"/> Pyrazinamide</td> <td><input type="checkbox"/> Cycloserine</td> </tr> <tr> <td><input type="checkbox"/> Isoniazid</td> <td><input type="checkbox"/> Ethionamide</td> </tr> <tr> <td><input type="checkbox"/> Ethambutol</td> <td><input type="checkbox"/> Prothionamide</td> </tr> <tr> <td><input type="checkbox"/> Streptomycin</td> <td><input type="checkbox"/> Para-aminosalicylic acid (PAS)</td> </tr> <tr> <td><input type="checkbox"/> Rifabutin</td> <td><input type="checkbox"/> Clofazimine</td> </tr> </table> |  | <input type="checkbox"/> RHZE | <input type="checkbox"/> Levofloxacin | <input type="checkbox"/> RH | <input type="checkbox"/> Moxifloxacin | <input type="checkbox"/> Rifampicin | <input type="checkbox"/> Terizidone | <input type="checkbox"/> Pyrazinamide | <input type="checkbox"/> Cycloserine | <input type="checkbox"/> Isoniazid | <input type="checkbox"/> Ethionamide | <input type="checkbox"/> Ethambutol | <input type="checkbox"/> Prothionamide | <input type="checkbox"/> Streptomycin | <input type="checkbox"/> Para-aminosalicylic acid (PAS) | <input type="checkbox"/> Rifabutin | <input type="checkbox"/> Clofazimine |
| <input type="checkbox"/> RHZE                            | <input type="checkbox"/> Levofloxacin                                                                                                                                                                                                                                                                                                                                                                                                                                                                                                                                                                                                                                                                                                                                                                                                                                                 |  |                               |                                       |                             |                                       |                                     |                                     |                                       |                                      |                                    |                                      |                                     |                                        |                                       |                                                         |                                    |                                      |
| <input type="checkbox"/> RH                              | <input type="checkbox"/> Moxifloxacin                                                                                                                                                                                                                                                                                                                                                                                                                                                                                                                                                                                                                                                                                                                                                                                                                                                 |  |                               |                                       |                             |                                       |                                     |                                     |                                       |                                      |                                    |                                      |                                     |                                        |                                       |                                                         |                                    |                                      |
| <input type="checkbox"/> Rifampicin                      | <input type="checkbox"/> Terizidone                                                                                                                                                                                                                                                                                                                                                                                                                                                                                                                                                                                                                                                                                                                                                                                                                                                   |  |                               |                                       |                             |                                       |                                     |                                     |                                       |                                      |                                    |                                      |                                     |                                        |                                       |                                                         |                                    |                                      |
| <input type="checkbox"/> Pyrazinamide                    | <input type="checkbox"/> Cycloserine                                                                                                                                                                                                                                                                                                                                                                                                                                                                                                                                                                                                                                                                                                                                                                                                                                                  |  |                               |                                       |                             |                                       |                                     |                                     |                                       |                                      |                                    |                                      |                                     |                                        |                                       |                                                         |                                    |                                      |
| <input type="checkbox"/> Isoniazid                       | <input type="checkbox"/> Ethionamide                                                                                                                                                                                                                                                                                                                                                                                                                                                                                                                                                                                                                                                                                                                                                                                                                                                  |  |                               |                                       |                             |                                       |                                     |                                     |                                       |                                      |                                    |                                      |                                     |                                        |                                       |                                                         |                                    |                                      |
| <input type="checkbox"/> Ethambutol                      | <input type="checkbox"/> Prothionamide                                                                                                                                                                                                                                                                                                                                                                                                                                                                                                                                                                                                                                                                                                                                                                                                                                                |  |                               |                                       |                             |                                       |                                     |                                     |                                       |                                      |                                    |                                      |                                     |                                        |                                       |                                                         |                                    |                                      |
| <input type="checkbox"/> Streptomycin                    | <input type="checkbox"/> Para-aminosalicylic acid (PAS)                                                                                                                                                                                                                                                                                                                                                                                                                                                                                                                                                                                                                                                                                                                                                                                                                               |  |                               |                                       |                             |                                       |                                     |                                     |                                       |                                      |                                    |                                      |                                     |                                        |                                       |                                                         |                                    |                                      |
| <input type="checkbox"/> Rifabutin                       | <input type="checkbox"/> Clofazimine                                                                                                                                                                                                                                                                                                                                                                                                                                                                                                                                                                                                                                                                                                                                                                                                                                                  |  |                               |                                       |                             |                                       |                                     |                                     |                                       |                                      |                                    |                                      |                                     |                                        |                                       |                                                         |                                    |                                      |

## IeDEA TB SRN

|                                                          |                                                                                                                                                                                                                                                                                                                                                                                                                                                                                                                                                                                                                                                                                                                                   |                                                                                                                                                          |
|----------------------------------------------------------|-----------------------------------------------------------------------------------------------------------------------------------------------------------------------------------------------------------------------------------------------------------------------------------------------------------------------------------------------------------------------------------------------------------------------------------------------------------------------------------------------------------------------------------------------------------------------------------------------------------------------------------------------------------------------------------------------------------------------------------|----------------------------------------------------------------------------------------------------------------------------------------------------------|
|                                                          | <input type="checkbox"/> Amikacin<br><input type="checkbox"/> Kanamycin<br><input type="checkbox"/> Capreomycin<br><input type="checkbox"/> Ofloxacin                                                                                                                                                                                                                                                                                                                                                                                                                                                                                                                                                                             | <input type="checkbox"/> Linezolid<br><input type="checkbox"/> Imipenem<br><input type="checkbox"/> Bedaquiline<br><input type="checkbox"/> Other: _____ |
| 19a. If RHZE, combination:                               | <input type="checkbox"/> RHZE 150/75/400/275 - 2 tablets<br><input type="checkbox"/> RHZE 150/75/400/275 - 3 tablets<br><input type="checkbox"/> RHZE 150/75/400/275 - 4 tablets<br><input type="checkbox"/> RHZE 150/75/400/275 - 5 tablets                                                                                                                                                                                                                                                                                                                                                                                                                                                                                      |                                                                                                                                                          |
| 19b. If RH, combination:                                 | <input type="checkbox"/> RH 150/75 - 2 tablets<br><input type="checkbox"/> RH 150/75 - 3 tablets<br><input type="checkbox"/> RH 150/75 - 4 tablets<br><input type="checkbox"/> RH 150/75 - 5 tablets<br><input type="checkbox"/> RH 300/200 - 1 tablet or capsule<br><input type="checkbox"/> RH 300/200 - 2 tablets or capsules<br><input type="checkbox"/> RH 300/200 - 1 tablet or capsule + RH 150/100 - 1 tablet<br><input type="checkbox"/> RH 300/200 - 2 tablets or capsules + RH 150/100 - 1 tablet                                                                                                                                                                                                                      |                                                                                                                                                          |
| 19c. Other drugs - Dose (mg)                             | _ _ _ _                                                                                                                                                                                                                                                                                                                                                                                                                                                                                                                                                                                                                                                                                                                           |                                                                                                                                                          |
| 19d. How many times a day is this medication prescribed? | _ _ _                                                                                                                                                                                                                                                                                                                                                                                                                                                                                                                                                                                                                                                                                                                             |                                                                                                                                                          |
| 19e. How many days a week is this medication prescribed? | _ _ _                                                                                                                                                                                                                                                                                                                                                                                                                                                                                                                                                                                                                                                                                                                             |                                                                                                                                                          |
| 19f. Start Date                                          | _ _ / _ _ / _ _ _ _  (dd/mm/yyyy)                                                                                                                                                                                                                                                                                                                                                                                                                                                                                                                                                                                                                                                                                                 |                                                                                                                                                          |
| 19g. Stop Date                                           | _ _ / _ _ / _ _ _ _  (dd/mm/yyyy)<br><input type="checkbox"/> Treatment Ongoing ( <i>return to update the status at next visit. Update stop date and reason once medication is stopped.</i> )<br><input type="checkbox"/> Unknown                                                                                                                                                                                                                                                                                                                                                                                                                                                                                                 |                                                                                                                                                          |
| 19h. Reason for change, interruption or completion       | <input type="checkbox"/> Completed intensive phase<br><input type="checkbox"/> Completed continuation phase<br><input type="checkbox"/> TB treatment failure<br><input type="checkbox"/> Drug resistance<br><input type="checkbox"/> Pregnancy<br><input type="checkbox"/> Side effects or toxicity<br><input type="checkbox"/> Incompatibility with ART (antiretroviral treatment)<br><input type="checkbox"/> Drug interaction<br><input type="checkbox"/> Participant stopped taking the meds<br><input type="checkbox"/> Lost to follow up<br><input type="checkbox"/> Dose adjustment (e.g. for weight change)<br><input type="checkbox"/> Death<br><input type="checkbox"/> Other _____<br><input type="checkbox"/> Unknown |                                                                                                                                                          |
| <b>TB Drug 20</b>                                        |                                                                                                                                                                                                                                                                                                                                                                                                                                                                                                                                                                                                                                                                                                                                   |                                                                                                                                                          |

## IeDEA TB SRN

|                                                          |                                                                                                                                                                                                                                                                                                                                                                                                                                                                                                                                                                                                                                                                                                                                                                                                                                                                                                                                                                                    |
|----------------------------------------------------------|------------------------------------------------------------------------------------------------------------------------------------------------------------------------------------------------------------------------------------------------------------------------------------------------------------------------------------------------------------------------------------------------------------------------------------------------------------------------------------------------------------------------------------------------------------------------------------------------------------------------------------------------------------------------------------------------------------------------------------------------------------------------------------------------------------------------------------------------------------------------------------------------------------------------------------------------------------------------------------|
| 20. TB Drug 20<br>(Select one)                           | <input type="checkbox"/> RHZE<br><input type="checkbox"/> RH<br><input type="checkbox"/> Rifampicin<br><input type="checkbox"/> Pyrazinamide<br><input type="checkbox"/> Isoniazid<br><input type="checkbox"/> Ethambutol<br><input type="checkbox"/> Streptomycin<br><input type="checkbox"/> Rifabutin<br><input type="checkbox"/> Amikacin<br><input type="checkbox"/> Kanamycin<br><input type="checkbox"/> Capreomycin<br><input type="checkbox"/> Ofloxacin<br><input type="checkbox"/> Levofloxacin<br><input type="checkbox"/> Moxifloxacin<br><input type="checkbox"/> Terizidone<br><input type="checkbox"/> Cycloserine<br><input type="checkbox"/> Ethionamide<br><input type="checkbox"/> Protionamide<br><input type="checkbox"/> Para-aminosalicylic acid (PAS)<br><input type="checkbox"/> Clofazimine<br><input type="checkbox"/> Linezolid<br><input type="checkbox"/> Imipenem<br><input type="checkbox"/> Bedaquiline<br><input type="checkbox"/> Other: _____ |
| 20a. If RHZE, combination:                               | <input type="checkbox"/> RHZE 150/75/400/275 - 2 tablets<br><input type="checkbox"/> RHZE 150/75/400/275 - 3 tablets<br><input type="checkbox"/> RHZE 150/75/400/275 - 4 tablets<br><input type="checkbox"/> RHZE 150/75/400/275 - 5 tablets                                                                                                                                                                                                                                                                                                                                                                                                                                                                                                                                                                                                                                                                                                                                       |
| 20b. If RH, combination:                                 | <input type="checkbox"/> RH 150/75 - 2 tablets<br><input type="checkbox"/> RH 150/75 - 3 tablets<br><input type="checkbox"/> RH 150/75 - 4 tablets<br><input type="checkbox"/> RH 150/75 - 5 tablets<br><input type="checkbox"/> RH 300/200 - 1 tablet or capsule<br><input type="checkbox"/> RH 300/200 - 2 tablets or capsules<br><input type="checkbox"/> RH 300/200 - 1 tablet or capsule + RH 150/100 - 1 tablet<br><input type="checkbox"/> RH 300/200 - 2 tablets or capsules + RH 150/100 - 1 tablet                                                                                                                                                                                                                                                                                                                                                                                                                                                                       |
| 20c. Other drugs - Dose (mg)                             | _ _ _ _                                                                                                                                                                                                                                                                                                                                                                                                                                                                                                                                                                                                                                                                                                                                                                                                                                                                                                                                                                            |
| 20d. How many times a day is this medication prescribed? | _ _ _                                                                                                                                                                                                                                                                                                                                                                                                                                                                                                                                                                                                                                                                                                                                                                                                                                                                                                                                                                              |
| 20e. How many days a week is this medication prescribed? | _ _ _                                                                                                                                                                                                                                                                                                                                                                                                                                                                                                                                                                                                                                                                                                                                                                                                                                                                                                                                                                              |
| 20f. Start Date                                          | _ _ / _ _ / _ _ _ _  (dd/mm/yyyy)                                                                                                                                                                                                                                                                                                                                                                                                                                                                                                                                                                                                                                                                                                                                                                                                                                                                                                                                                  |
| 20g. Stop Date                                           | _ _ / _ _ / _ _ _ _  (dd/mm/yyyy)<br><input type="checkbox"/> Treatment Ongoing (Return to update the status at next visit. Update stop date and reason once medication is stopped.)<br><input type="checkbox"/> Unknown                                                                                                                                                                                                                                                                                                                                                                                                                                                                                                                                                                                                                                                                                                                                                           |
| 20h. Reason for change, interruption or completion       | <input type="checkbox"/> Completed intensive phase<br><input type="checkbox"/> Completed continuation phase<br><input type="checkbox"/> TB treatment failure<br><input type="checkbox"/> Drug resistance<br><input type="checkbox"/> Pregnancy<br><input type="checkbox"/> Side effects or toxicity<br><input type="checkbox"/> Incompatibility with ART (antiretroviral treatment)<br><input type="checkbox"/> Drug interaction<br><input type="checkbox"/> Participant stopped taking the meds<br><input type="checkbox"/> Lost to follow up                                                                                                                                                                                                                                                                                                                                                                                                                                     |

**leDEA TB SRN**

|                                                                |                                                                                                                                                                                                        |
|----------------------------------------------------------------|--------------------------------------------------------------------------------------------------------------------------------------------------------------------------------------------------------|
|                                                                | <input type="checkbox"/> Dose adjustment (e.g. for weight change)<br><input type="checkbox"/> Death<br><input type="checkbox"/> Other _____<br><input type="checkbox"/> Unknown                        |
| <b>Treatment End Summary</b>                                   |                                                                                                                                                                                                        |
| 21. Has this participant finished the prescribed TB treatment? | <input type="checkbox"/> Yes (complete the <b>TB Treatment Outcomes</b> form)<br><input type="checkbox"/> No<br><input type="checkbox"/> Not applicable<br><input type="checkbox"/> Still on treatment |
| 24. Notes (optional)                                           |                                                                                                                                                                                                        |

Investigator: \_\_\_\_\_ Signature: \_\_\_\_\_ Date |\_|\_| / |\_|\_| / |\_|\_|\_|\_|

## leDEA TB SRN

| [20] TB TREATMENT ADHERENCE                                                             |                                                                                                                                                                                                                                                                                                                                                                                                                                                                                                                                                                                                                                                                                                                                                                                                                                                                           |
|-----------------------------------------------------------------------------------------|---------------------------------------------------------------------------------------------------------------------------------------------------------------------------------------------------------------------------------------------------------------------------------------------------------------------------------------------------------------------------------------------------------------------------------------------------------------------------------------------------------------------------------------------------------------------------------------------------------------------------------------------------------------------------------------------------------------------------------------------------------------------------------------------------------------------------------------------------------------------------|
| <b>leDEA/TB SRN ID</b>                                                                  |                                                                                                                                                                                                                                                                                                                                                                                                                                                                                                                                                                                                                                                                                                                                                                                                                                                                           |
| Visit                                                                                   | <input type="checkbox"/> Month 1<br><input type="checkbox"/> Month 2<br><input type="checkbox"/> End of Tx<br><input type="checkbox"/> Tx F/R/W                                                                                                                                                                                                                                                                                                                                                                                                                                                                                                                                                                                                                                                                                                                           |
| Visit date (dd/mm/yyyy)                                                                 | _ _ / _ _ / _ _ _ _                                                                                                                                                                                                                                                                                                                                                                                                                                                                                                                                                                                                                                                                                                                                                                                                                                                       |
| <b>Adherence questions</b>                                                              |                                                                                                                                                                                                                                                                                                                                                                                                                                                                                                                                                                                                                                                                                                                                                                                                                                                                           |
| 1. Any dose of TB drugs missed in the last 4 days                                       | <input type="checkbox"/> Yes<br><input type="checkbox"/> No<br><input type="checkbox"/> Unknown                                                                                                                                                                                                                                                                                                                                                                                                                                                                                                                                                                                                                                                                                                                                                                           |
| 1a. If yes, number of TB drugs doses missed in the last 4 days                          | _ _  doses                                                                                                                                                                                                                                                                                                                                                                                                                                                                                                                                                                                                                                                                                                                                                                                                                                                                |
| 2. Any dose of TB drugs missed in the last 30 days?                                     | <input type="checkbox"/> Yes<br><input type="checkbox"/> No<br><input type="checkbox"/> Unknown                                                                                                                                                                                                                                                                                                                                                                                                                                                                                                                                                                                                                                                                                                                                                                           |
| <b>Pill count for TB drugs</b>                                                          |                                                                                                                                                                                                                                                                                                                                                                                                                                                                                                                                                                                                                                                                                                                                                                                                                                                                           |
| 3. Date of last TB treatment refill (dd/mm/yyyy)                                        | _ _ / _ _ / _ _ _ _  <input type="checkbox"/> Unknown                                                                                                                                                                                                                                                                                                                                                                                                                                                                                                                                                                                                                                                                                                                                                                                                                     |
| 4. Expected number of tablets for TB treatment taken daily (since last refill)          | _ _  <input type="checkbox"/> Unknown                                                                                                                                                                                                                                                                                                                                                                                                                                                                                                                                                                                                                                                                                                                                                                                                                                     |
| 5. Number of tablets at last refill (tablets given + tablets patient already had)       | _ _ _  <input type="checkbox"/> Unknown                                                                                                                                                                                                                                                                                                                                                                                                                                                                                                                                                                                                                                                                                                                                                                                                                                   |
| 6. Number of tablets brought back                                                       | _ _ _  <input type="checkbox"/> Unknown                                                                                                                                                                                                                                                                                                                                                                                                                                                                                                                                                                                                                                                                                                                                                                                                                                   |
| 7. Description of any adherence challenges for TB drugs ( <i>Check all that apply</i> ) | <input type="checkbox"/> Forgetting dose(s)<br><input type="checkbox"/> Difficulty tolerating medication(s) / side effects<br><input type="checkbox"/> Unable to take medication(s) while feeling ill or unwell<br><input type="checkbox"/> Unable to take medication(s) due to not having food<br><input type="checkbox"/> Did not have privacy / unable to take medication(s) while around others<br><input type="checkbox"/> Not willing to take medication(s)<br><input type="checkbox"/> Did not have medication(s) with me at the time for dose<br><input type="checkbox"/> Did not have a sufficient supply of medication(s)<br><input type="checkbox"/> Medication(s) have not been available from pharmacy (e.g., stock-out)<br><input type="checkbox"/> Other (specify) _____<br><input type="checkbox"/> Unknown<br><input type="checkbox"/> Decline to answer |

Investigator: \_\_\_\_\_

Signature: \_\_\_\_\_

Date |\_|\_|/|\_|\_|/|\_|\_|\_|\_|

ID Number \_\_\_\_\_

TB Treatment Adherence Page 1 of 1

v1.0 26Jul2022

## IeDEA TB-SRN

| [21] Directly Observed Therapy (DOT) for TB                                                                                                                                         |                                                                                                                                                                                                                                                                                                                                                                            |
|-------------------------------------------------------------------------------------------------------------------------------------------------------------------------------------|----------------------------------------------------------------------------------------------------------------------------------------------------------------------------------------------------------------------------------------------------------------------------------------------------------------------------------------------------------------------------|
| <b>IeDEA/TB SRN ID</b>                                                                                                                                                              |                                                                                                                                                                                                                                                                                                                                                                            |
| Visit                                                                                                                                                                               | <input type="checkbox"/> Month 1<br><input type="checkbox"/> Month 2<br><input type="checkbox"/> End of Tx<br><input type="checkbox"/> Tx F/R/W                                                                                                                                                                                                                            |
| Visit date                                                                                                                                                                          | ____/____/____ (dd/mm/yyyy)                                                                                                                                                                                                                                                                                                                                                |
| 1. Is this participant under <u>any form</u> of Directly Observed Therapy (DOT)?                                                                                                    | <input type="checkbox"/> Yes (complete form below)<br><input type="checkbox"/> No<br><input type="checkbox"/> Unknown                                                                                                                                                                                                                                                      |
| <b>Intensive Phase</b>                                                                                                                                                              |                                                                                                                                                                                                                                                                                                                                                                            |
| 2. Which types of DOTs, according to the study protocol definitions, are currently being or will be done for this participant during the intensive phase?<br>(Check all that apply) | <input type="checkbox"/> In person - with healthcare worker<br><input type="checkbox"/> In person - with community health worker<br><input type="checkbox"/> In person - with family member or another trusted person<br><input type="checkbox"/> Virtual - through smartphone via text message, photo or video<br><input type="checkbox"/> Telephone - by telephone calls |
| 3. Start Date of DOT                                                                                                                                                                | ____/____/____ (dd/mm/yyyy)                                                                                                                                                                                                                                                                                                                                                |
| 4. Intensive phase ongoing or completed?                                                                                                                                            | <input type="checkbox"/> Ongoing → SKIP to #8<br><input type="checkbox"/> Completed (fill below)                                                                                                                                                                                                                                                                           |
| 5. End Date of DOT (if applicable)                                                                                                                                                  | ____/____/____ (dd/mm/yyyy)                                                                                                                                                                                                                                                                                                                                                |
| <b>6. Intensive phase: how many doses did the patient take by...</b>                                                                                                                |                                                                                                                                                                                                                                                                                                                                                                            |
| a. In-Person DOT with a healthcare worker?                                                                                                                                          | ____ doses                                                                                                                                                                                                                                                                                                                                                                 |
| b. In-Person DOT with a community health worker?                                                                                                                                    | ____ doses                                                                                                                                                                                                                                                                                                                                                                 |
| c. In-Person DOT with a family member or other trusted person?                                                                                                                      | ____ doses                                                                                                                                                                                                                                                                                                                                                                 |
| d. Virtual DOT?                                                                                                                                                                     | ____ doses                                                                                                                                                                                                                                                                                                                                                                 |
| e. Telephone DOT?                                                                                                                                                                   | ____ doses                                                                                                                                                                                                                                                                                                                                                                 |
| f. without being observed? (e.g., doses administered without DOT, for example weekends, holidays and or treatment days before recruitment in the study)                             | ____ doses                                                                                                                                                                                                                                                                                                                                                                 |

ID Number \_\_\_\_\_  
v1.0 26Jul2022

DOT Page 1 of 2



|                                                                                                                                                                                         |                                                                                                                                                                                                                                                                                                                                                                                  |
|-----------------------------------------------------------------------------------------------------------------------------------------------------------------------------------------|----------------------------------------------------------------------------------------------------------------------------------------------------------------------------------------------------------------------------------------------------------------------------------------------------------------------------------------------------------------------------------|
| 7. How many doses has the participant missed in the intensive phase?                                                                                                                    | _ _ _  doses                                                                                                                                                                                                                                                                                                                                                                     |
| 8. Has the participant interrupted the intensive phase of TB treatment for any reason, and for any duration?                                                                            | <input type="checkbox"/> Yes (report on <b>TB Treatment</b> form)<br><input type="checkbox"/> No                                                                                                                                                                                                                                                                                 |
| <b>Continuation Phase</b>                                                                                                                                                               |                                                                                                                                                                                                                                                                                                                                                                                  |
| 9. Continuation phase ongoing or completed?                                                                                                                                             | <input type="checkbox"/> Not yet started → END form<br><input type="checkbox"/> Ongoing (fill below)<br><input type="checkbox"/> Completed (fill below)                                                                                                                                                                                                                          |
| 10. Which types of DOTs, according to the study protocol definitions, are currently being or will be done for this participant during the continuation phase?<br>(Check all that apply) | <input type="checkbox"/> In person - with healthcare worker<br><input type="checkbox"/> In person - with community health worker<br><input type="checkbox"/> In person - with family member or another trusted person<br><input type="checkbox"/> Virtual - through smartphone via text message, photo or video<br><input type="checkbox"/> Telephone - by daily telephone calls |
| 11. Start Date                                                                                                                                                                          | _ _ / _ _ / _ _ _ _  (dd/mm/yyyy)                                                                                                                                                                                                                                                                                                                                                |
| 12. Continuation phase                                                                                                                                                                  | <input type="checkbox"/> Ongoing → SKIP to #16<br><input type="checkbox"/> Completed (fill below)                                                                                                                                                                                                                                                                                |
| 13. End Date                                                                                                                                                                            | _ _ / _ _ / _ _ _ _  (dd/mm/yyyy)                                                                                                                                                                                                                                                                                                                                                |
| <b>14. Continuation phase: how many doses did the patient take by...</b>                                                                                                                |                                                                                                                                                                                                                                                                                                                                                                                  |
| a. In-Person DOT with a healthcare worker?                                                                                                                                              | _ _ _  doses                                                                                                                                                                                                                                                                                                                                                                     |
| b. In-Person DOT with a community health worker?                                                                                                                                        | _ _ _  doses                                                                                                                                                                                                                                                                                                                                                                     |
| c. In-Person DOT with a family member or other trusted person?                                                                                                                          | _ _ _  doses                                                                                                                                                                                                                                                                                                                                                                     |
| d. Virtual DOT?                                                                                                                                                                         | _ _ _  doses                                                                                                                                                                                                                                                                                                                                                                     |
| e. Telephone DOT?                                                                                                                                                                       | _ _ _  doses                                                                                                                                                                                                                                                                                                                                                                     |
| f. without being observed? (e.g., doses administered without DOT, for example weekends, holidays and or treatment days before recruitment in the study)                                 | _ _ _  doses                                                                                                                                                                                                                                                                                                                                                                     |
| 15. How many doses has the participant missed in the continuation phase?                                                                                                                | _ _ _  doses                                                                                                                                                                                                                                                                                                                                                                     |
| 16. Has the participant interrupted the continuation phase of TB treatment by any reason?                                                                                               | <input type="checkbox"/> Yes (report on <b>TB Treatment</b> form)<br><input type="checkbox"/> No                                                                                                                                                                                                                                                                                 |

Investigator: \_\_\_\_\_ Signature: \_\_\_\_\_ Date |\_|\_|/|\_|\_|/|\_|\_|\_|\_|  
 ID Number \_\_\_\_\_ DOT Page 2 of 2  
 v1.0 26Jul2022

## leDEA TB SRN

| [22] Antiretroviral Therapy (ART) for HIV<br>(REDCap Flowchart Form) |                     |                                                                                                                                                                                                                                                                                                                                                                                                                                                                                                                                                                                                                                                                                                                                                                                                                                                                                                                                                                                          |                     |
|----------------------------------------------------------------------|---------------------|------------------------------------------------------------------------------------------------------------------------------------------------------------------------------------------------------------------------------------------------------------------------------------------------------------------------------------------------------------------------------------------------------------------------------------------------------------------------------------------------------------------------------------------------------------------------------------------------------------------------------------------------------------------------------------------------------------------------------------------------------------------------------------------------------------------------------------------------------------------------------------------------------------------------------------------------------------------------------------------|---------------------|
| leDEA/TB SRN ID                                                      |                     |                                                                                                                                                                                                                                                                                                                                                                                                                                                                                                                                                                                                                                                                                                                                                                                                                                                                                                                                                                                          |                     |
| Visit                                                                | Date (dd/mm/yyyy)   | Visit                                                                                                                                                                                                                                                                                                                                                                                                                                                                                                                                                                                                                                                                                                                                                                                                                                                                                                                                                                                    | Date (dd/mm/yyyy)   |
| <input type="checkbox"/> Baseline                                    | _ _ / _ _ / _ _ _ _ | <input type="checkbox"/> 6-M Post-Tx                                                                                                                                                                                                                                                                                                                                                                                                                                                                                                                                                                                                                                                                                                                                                                                                                                                                                                                                                     | _ _ / _ _ / _ _ _ _ |
| <input type="checkbox"/> Month 1                                     | _ _ / _ _ / _ _ _ _ | <input type="checkbox"/> 12-M Post-Tx                                                                                                                                                                                                                                                                                                                                                                                                                                                                                                                                                                                                                                                                                                                                                                                                                                                                                                                                                    | _ _ / _ _ / _ _ _ _ |
| <input type="checkbox"/> Month 2                                     | _ _ / _ _ / _ _ _ _ | <input type="checkbox"/> Tx F/R/W                                                                                                                                                                                                                                                                                                                                                                                                                                                                                                                                                                                                                                                                                                                                                                                                                                                                                                                                                        | _ _ / _ _ / _ _ _ _ |
| <input type="checkbox"/> End of Tx                                   | _ _ / _ _ / _ _ _ _ |                                                                                                                                                                                                                                                                                                                                                                                                                                                                                                                                                                                                                                                                                                                                                                                                                                                                                                                                                                                          |                     |
| HIV Drug 1                                                           |                     |                                                                                                                                                                                                                                                                                                                                                                                                                                                                                                                                                                                                                                                                                                                                                                                                                                                                                                                                                                                          |                     |
| 1. Antiretroviral (ARV) 1<br>(Select one)                            |                     | <input type="checkbox"/> abacavir (ABC) <input type="checkbox"/> maraviroc (MVC)<br><input type="checkbox"/> atazanavir (ATV) <input type="checkbox"/> nevirapine (NVP)<br><input type="checkbox"/> darunavir (DRV) <input type="checkbox"/> raltegravir (RAL)<br><input type="checkbox"/> didanosine (ddI) <input type="checkbox"/> ritonavir (RTV)<br><input type="checkbox"/> dolutegravir (DTG) <input type="checkbox"/> stavudine (d4T)<br><input type="checkbox"/> efavirenz (EFV) <input type="checkbox"/> tenofovir alafenamide (TAF)<br><input type="checkbox"/> enfuvirtide (ENF) <input type="checkbox"/> tenofovir disoproxil fumarate (TDF)<br><input type="checkbox"/> emtricitabine (FTC) <input type="checkbox"/> tipranavir (TPV)<br><input type="checkbox"/> etravirine (ETR) <input type="checkbox"/> zidovudine (AZT/ZDV)<br><input type="checkbox"/> lamivudine (3TC)<br><input type="checkbox"/> lopinavir/ritonavir (LPV/r) <input type="checkbox"/> Other: _____ |                     |
| 1a. Drug is part of a fixed-dose combination                         |                     | <input type="checkbox"/> Yes <input type="checkbox"/> No                                                                                                                                                                                                                                                                                                                                                                                                                                                                                                                                                                                                                                                                                                                                                                                                                                                                                                                                 |                     |
| 1b. How many times a day is this medication prescribed?              |                     | _ _ _                                                                                                                                                                                                                                                                                                                                                                                                                                                                                                                                                                                                                                                                                                                                                                                                                                                                                                                                                                                    |                     |
| 1c. How many days a week is this medication prescribed?              |                     | _ _ _                                                                                                                                                                                                                                                                                                                                                                                                                                                                                                                                                                                                                                                                                                                                                                                                                                                                                                                                                                                    |                     |
| 1d. Start Date                                                       |                     | _ _ / _ _ / _ _ _ _  (dd/mm/yyyy)<br><input type="checkbox"/> Unknown                                                                                                                                                                                                                                                                                                                                                                                                                                                                                                                                                                                                                                                                                                                                                                                                                                                                                                                    |                     |
| 1e. Stop Date                                                        |                     | _ _ / _ _ / _ _ _ _  (dd/mm/yyyy)<br><input type="checkbox"/> Ongoing (Return to update stop date if changed)<br><input type="checkbox"/> Unknown                                                                                                                                                                                                                                                                                                                                                                                                                                                                                                                                                                                                                                                                                                                                                                                                                                        |                     |
| 1f. Reason for change or interruption                                |                     | <input type="checkbox"/> Drug resistance                                                                                                                                                                                                                                                                                                                                                                                                                                                                                                                                                                                                                                                                                                                                                                                                                                                                                                                                                 |                     |

ID Number \_\_\_\_\_

ART Page 1 of 8 v1.0 26Jul2022

## leDEA TB SRN

|                                                                                                                                                                                                                                                                                                                                                                                                                                                                                                                          |                                                                                                                                                                                                                                                                                                                                                                                                                                                                                                                                                                                                                                                                                                                                                                                                                                                                                                                                                                                                                                                                                                                             |                                                                                                                                                                                                                                                                                                                                                                                                                                                                                                                          |                                                                                                                                                                                                                                                                                                                                                                                                                                                                                                |
|--------------------------------------------------------------------------------------------------------------------------------------------------------------------------------------------------------------------------------------------------------------------------------------------------------------------------------------------------------------------------------------------------------------------------------------------------------------------------------------------------------------------------|-----------------------------------------------------------------------------------------------------------------------------------------------------------------------------------------------------------------------------------------------------------------------------------------------------------------------------------------------------------------------------------------------------------------------------------------------------------------------------------------------------------------------------------------------------------------------------------------------------------------------------------------------------------------------------------------------------------------------------------------------------------------------------------------------------------------------------------------------------------------------------------------------------------------------------------------------------------------------------------------------------------------------------------------------------------------------------------------------------------------------------|--------------------------------------------------------------------------------------------------------------------------------------------------------------------------------------------------------------------------------------------------------------------------------------------------------------------------------------------------------------------------------------------------------------------------------------------------------------------------------------------------------------------------|------------------------------------------------------------------------------------------------------------------------------------------------------------------------------------------------------------------------------------------------------------------------------------------------------------------------------------------------------------------------------------------------------------------------------------------------------------------------------------------------|
|                                                                                                                                                                                                                                                                                                                                                                                                                                                                                                                          | <input type="checkbox"/> Drug interaction<br><input type="checkbox"/> Pregnancy<br><input type="checkbox"/> Side effects or toxicity<br><input type="checkbox"/> Compatibility with TB drugs<br><input type="checkbox"/> Participant stopped taking meds<br><input type="checkbox"/> Lost to follow up<br><input type="checkbox"/> Death<br><input type="checkbox"/> Other _____<br><input type="checkbox"/> Unknown                                                                                                                                                                                                                                                                                                                                                                                                                                                                                                                                                                                                                                                                                                        |                                                                                                                                                                                                                                                                                                                                                                                                                                                                                                                          |                                                                                                                                                                                                                                                                                                                                                                                                                                                                                                |
| <b>HIV Drug 2</b>                                                                                                                                                                                                                                                                                                                                                                                                                                                                                                        |                                                                                                                                                                                                                                                                                                                                                                                                                                                                                                                                                                                                                                                                                                                                                                                                                                                                                                                                                                                                                                                                                                                             |                                                                                                                                                                                                                                                                                                                                                                                                                                                                                                                          |                                                                                                                                                                                                                                                                                                                                                                                                                                                                                                |
| 2. ARV 2<br>(Select one)                                                                                                                                                                                                                                                                                                                                                                                                                                                                                                 | <table border="1"> <tr> <td> <input type="checkbox"/> abacavir (ABC)<br/> <input type="checkbox"/> atazanavir (ATV)<br/> <input type="checkbox"/> darunavir (DRV)<br/> <input type="checkbox"/> didanosine (ddI)<br/> <input type="checkbox"/> dolutegravir (DTG)<br/> <input type="checkbox"/> efavirenz (EFV)<br/> <input type="checkbox"/> enfuvirtide (ENF)<br/> <input type="checkbox"/> emtricitabine (FTC)<br/> <input type="checkbox"/> etravirine (ETR)<br/> <input type="checkbox"/> lamivudine (3TC)<br/> <input type="checkbox"/> lopinavir/ritonavir (LPV/r) </td> <td> <input type="checkbox"/> maraviroc (MVC)<br/> <input type="checkbox"/> nevirapine (NVP)<br/> <input type="checkbox"/> raltegravir (RAL)<br/> <input type="checkbox"/> ritonavir (RTV)<br/> <input type="checkbox"/> stavudine (d4T)<br/> <input type="checkbox"/> tenofovir alafenamide (TAF)<br/> <input type="checkbox"/> tenofovir disoproxil fumarate (TDF)<br/> <input type="checkbox"/> tipranavir (TPV)<br/> <input type="checkbox"/> zidovudine (AZT/ZDV)<br/><br/> <input type="checkbox"/> Other: _____ </td> </tr> </table> | <input type="checkbox"/> abacavir (ABC)<br><input type="checkbox"/> atazanavir (ATV)<br><input type="checkbox"/> darunavir (DRV)<br><input type="checkbox"/> didanosine (ddI)<br><input type="checkbox"/> dolutegravir (DTG)<br><input type="checkbox"/> efavirenz (EFV)<br><input type="checkbox"/> enfuvirtide (ENF)<br><input type="checkbox"/> emtricitabine (FTC)<br><input type="checkbox"/> etravirine (ETR)<br><input type="checkbox"/> lamivudine (3TC)<br><input type="checkbox"/> lopinavir/ritonavir (LPV/r) | <input type="checkbox"/> maraviroc (MVC)<br><input type="checkbox"/> nevirapine (NVP)<br><input type="checkbox"/> raltegravir (RAL)<br><input type="checkbox"/> ritonavir (RTV)<br><input type="checkbox"/> stavudine (d4T)<br><input type="checkbox"/> tenofovir alafenamide (TAF)<br><input type="checkbox"/> tenofovir disoproxil fumarate (TDF)<br><input type="checkbox"/> tipranavir (TPV)<br><input type="checkbox"/> zidovudine (AZT/ZDV)<br><br><input type="checkbox"/> Other: _____ |
| <input type="checkbox"/> abacavir (ABC)<br><input type="checkbox"/> atazanavir (ATV)<br><input type="checkbox"/> darunavir (DRV)<br><input type="checkbox"/> didanosine (ddI)<br><input type="checkbox"/> dolutegravir (DTG)<br><input type="checkbox"/> efavirenz (EFV)<br><input type="checkbox"/> enfuvirtide (ENF)<br><input type="checkbox"/> emtricitabine (FTC)<br><input type="checkbox"/> etravirine (ETR)<br><input type="checkbox"/> lamivudine (3TC)<br><input type="checkbox"/> lopinavir/ritonavir (LPV/r) | <input type="checkbox"/> maraviroc (MVC)<br><input type="checkbox"/> nevirapine (NVP)<br><input type="checkbox"/> raltegravir (RAL)<br><input type="checkbox"/> ritonavir (RTV)<br><input type="checkbox"/> stavudine (d4T)<br><input type="checkbox"/> tenofovir alafenamide (TAF)<br><input type="checkbox"/> tenofovir disoproxil fumarate (TDF)<br><input type="checkbox"/> tipranavir (TPV)<br><input type="checkbox"/> zidovudine (AZT/ZDV)<br><br><input type="checkbox"/> Other: _____                                                                                                                                                                                                                                                                                                                                                                                                                                                                                                                                                                                                                              |                                                                                                                                                                                                                                                                                                                                                                                                                                                                                                                          |                                                                                                                                                                                                                                                                                                                                                                                                                                                                                                |
| 2a. Drug is part of a fixed-dose combination                                                                                                                                                                                                                                                                                                                                                                                                                                                                             | <input type="checkbox"/> Yes <input type="checkbox"/> No                                                                                                                                                                                                                                                                                                                                                                                                                                                                                                                                                                                                                                                                                                                                                                                                                                                                                                                                                                                                                                                                    |                                                                                                                                                                                                                                                                                                                                                                                                                                                                                                                          |                                                                                                                                                                                                                                                                                                                                                                                                                                                                                                |
| 2b. How many times a day is this medication prescribed?                                                                                                                                                                                                                                                                                                                                                                                                                                                                  | _ _ _ _                                                                                                                                                                                                                                                                                                                                                                                                                                                                                                                                                                                                                                                                                                                                                                                                                                                                                                                                                                                                                                                                                                                     |                                                                                                                                                                                                                                                                                                                                                                                                                                                                                                                          |                                                                                                                                                                                                                                                                                                                                                                                                                                                                                                |
| 2c. How many days a week is this medication prescribed?                                                                                                                                                                                                                                                                                                                                                                                                                                                                  | _ _ _ _                                                                                                                                                                                                                                                                                                                                                                                                                                                                                                                                                                                                                                                                                                                                                                                                                                                                                                                                                                                                                                                                                                                     |                                                                                                                                                                                                                                                                                                                                                                                                                                                                                                                          |                                                                                                                                                                                                                                                                                                                                                                                                                                                                                                |
| 2d. Start Date                                                                                                                                                                                                                                                                                                                                                                                                                                                                                                           | _ _ _ / _ _ / _ _ _ _  (dd/mm/yyyy)<br><input type="checkbox"/> Unknown                                                                                                                                                                                                                                                                                                                                                                                                                                                                                                                                                                                                                                                                                                                                                                                                                                                                                                                                                                                                                                                     |                                                                                                                                                                                                                                                                                                                                                                                                                                                                                                                          |                                                                                                                                                                                                                                                                                                                                                                                                                                                                                                |
| 2e. Stop Date                                                                                                                                                                                                                                                                                                                                                                                                                                                                                                            | _ _ _ / _ _ / _ _ _ _  (dd/mm/yyyy)<br><input type="checkbox"/> Ongoing (Return to update stop date if changed)<br><input type="checkbox"/> Unknown                                                                                                                                                                                                                                                                                                                                                                                                                                                                                                                                                                                                                                                                                                                                                                                                                                                                                                                                                                         |                                                                                                                                                                                                                                                                                                                                                                                                                                                                                                                          |                                                                                                                                                                                                                                                                                                                                                                                                                                                                                                |
| 2f. Reason for change or interruption                                                                                                                                                                                                                                                                                                                                                                                                                                                                                    | <input type="checkbox"/> Drug resistance<br><input type="checkbox"/> Drug interaction<br><input type="checkbox"/> Pregnancy<br><input type="checkbox"/> Side effects or toxicity<br><input type="checkbox"/> Compatibility with TB drugs<br><input type="checkbox"/> Participant stopped taking meds<br><input type="checkbox"/> Lost to follow up<br><input type="checkbox"/> Death                                                                                                                                                                                                                                                                                                                                                                                                                                                                                                                                                                                                                                                                                                                                        |                                                                                                                                                                                                                                                                                                                                                                                                                                                                                                                          |                                                                                                                                                                                                                                                                                                                                                                                                                                                                                                |

ID Number \_\_\_\_\_

ART Page 2 of 8 v1.0 26Jul2022

## IeDEA TB SRN

|                                                                                                                                                                                                                                                                                                                                                                                                                                                                                                                          |                                                                                                                                                                                                                                                                                                                                                                                                                                                                                                                                                                                                                                                                                                                                                                                                                                                                                                                                                                                                                                                                                                                             |                                                                                                                                                                                                                                                                                                                                                                                                                                                                                                                          |                                                                                                                                                                                                                                                                                                                                                                                                                                                                                                |
|--------------------------------------------------------------------------------------------------------------------------------------------------------------------------------------------------------------------------------------------------------------------------------------------------------------------------------------------------------------------------------------------------------------------------------------------------------------------------------------------------------------------------|-----------------------------------------------------------------------------------------------------------------------------------------------------------------------------------------------------------------------------------------------------------------------------------------------------------------------------------------------------------------------------------------------------------------------------------------------------------------------------------------------------------------------------------------------------------------------------------------------------------------------------------------------------------------------------------------------------------------------------------------------------------------------------------------------------------------------------------------------------------------------------------------------------------------------------------------------------------------------------------------------------------------------------------------------------------------------------------------------------------------------------|--------------------------------------------------------------------------------------------------------------------------------------------------------------------------------------------------------------------------------------------------------------------------------------------------------------------------------------------------------------------------------------------------------------------------------------------------------------------------------------------------------------------------|------------------------------------------------------------------------------------------------------------------------------------------------------------------------------------------------------------------------------------------------------------------------------------------------------------------------------------------------------------------------------------------------------------------------------------------------------------------------------------------------|
|                                                                                                                                                                                                                                                                                                                                                                                                                                                                                                                          | <input type="checkbox"/> Participant removed from study<br><input type="checkbox"/> Other _____<br><input type="checkbox"/> Unknown                                                                                                                                                                                                                                                                                                                                                                                                                                                                                                                                                                                                                                                                                                                                                                                                                                                                                                                                                                                         |                                                                                                                                                                                                                                                                                                                                                                                                                                                                                                                          |                                                                                                                                                                                                                                                                                                                                                                                                                                                                                                |
| <b>HIV Drug 3</b>                                                                                                                                                                                                                                                                                                                                                                                                                                                                                                        |                                                                                                                                                                                                                                                                                                                                                                                                                                                                                                                                                                                                                                                                                                                                                                                                                                                                                                                                                                                                                                                                                                                             |                                                                                                                                                                                                                                                                                                                                                                                                                                                                                                                          |                                                                                                                                                                                                                                                                                                                                                                                                                                                                                                |
| 3. ARV 3<br>(Select one)                                                                                                                                                                                                                                                                                                                                                                                                                                                                                                 | <table border="1"> <tr> <td> <input type="checkbox"/> abacavir (ABC)<br/> <input type="checkbox"/> atazanavir (ATV)<br/> <input type="checkbox"/> darunavir (DRV)<br/> <input type="checkbox"/> didanosine (ddI)<br/> <input type="checkbox"/> dolutegravir (DTG)<br/> <input type="checkbox"/> efavirenz (EFV)<br/> <input type="checkbox"/> enfuvirtide (ENF)<br/> <input type="checkbox"/> emtricitabine (FTC)<br/> <input type="checkbox"/> etravirine (ETR)<br/> <input type="checkbox"/> lamivudine (3TC)<br/> <input type="checkbox"/> lopinavir/ritonavir (LPV/r) </td> <td> <input type="checkbox"/> maraviroc (MVC)<br/> <input type="checkbox"/> nevirapine (NVP)<br/> <input type="checkbox"/> raltegravir (RAL)<br/> <input type="checkbox"/> ritonavir (RTV)<br/> <input type="checkbox"/> stavudine (d4T)<br/> <input type="checkbox"/> tenofovir alafenamide (TAF)<br/> <input type="checkbox"/> tenofovir disoproxil fumarate (TDF)<br/> <input type="checkbox"/> tipranavir (TPV)<br/> <input type="checkbox"/> zidovudine (AZT/ZDV)<br/><br/> <input type="checkbox"/> Other: _____ </td> </tr> </table> | <input type="checkbox"/> abacavir (ABC)<br><input type="checkbox"/> atazanavir (ATV)<br><input type="checkbox"/> darunavir (DRV)<br><input type="checkbox"/> didanosine (ddI)<br><input type="checkbox"/> dolutegravir (DTG)<br><input type="checkbox"/> efavirenz (EFV)<br><input type="checkbox"/> enfuvirtide (ENF)<br><input type="checkbox"/> emtricitabine (FTC)<br><input type="checkbox"/> etravirine (ETR)<br><input type="checkbox"/> lamivudine (3TC)<br><input type="checkbox"/> lopinavir/ritonavir (LPV/r) | <input type="checkbox"/> maraviroc (MVC)<br><input type="checkbox"/> nevirapine (NVP)<br><input type="checkbox"/> raltegravir (RAL)<br><input type="checkbox"/> ritonavir (RTV)<br><input type="checkbox"/> stavudine (d4T)<br><input type="checkbox"/> tenofovir alafenamide (TAF)<br><input type="checkbox"/> tenofovir disoproxil fumarate (TDF)<br><input type="checkbox"/> tipranavir (TPV)<br><input type="checkbox"/> zidovudine (AZT/ZDV)<br><br><input type="checkbox"/> Other: _____ |
| <input type="checkbox"/> abacavir (ABC)<br><input type="checkbox"/> atazanavir (ATV)<br><input type="checkbox"/> darunavir (DRV)<br><input type="checkbox"/> didanosine (ddI)<br><input type="checkbox"/> dolutegravir (DTG)<br><input type="checkbox"/> efavirenz (EFV)<br><input type="checkbox"/> enfuvirtide (ENF)<br><input type="checkbox"/> emtricitabine (FTC)<br><input type="checkbox"/> etravirine (ETR)<br><input type="checkbox"/> lamivudine (3TC)<br><input type="checkbox"/> lopinavir/ritonavir (LPV/r) | <input type="checkbox"/> maraviroc (MVC)<br><input type="checkbox"/> nevirapine (NVP)<br><input type="checkbox"/> raltegravir (RAL)<br><input type="checkbox"/> ritonavir (RTV)<br><input type="checkbox"/> stavudine (d4T)<br><input type="checkbox"/> tenofovir alafenamide (TAF)<br><input type="checkbox"/> tenofovir disoproxil fumarate (TDF)<br><input type="checkbox"/> tipranavir (TPV)<br><input type="checkbox"/> zidovudine (AZT/ZDV)<br><br><input type="checkbox"/> Other: _____                                                                                                                                                                                                                                                                                                                                                                                                                                                                                                                                                                                                                              |                                                                                                                                                                                                                                                                                                                                                                                                                                                                                                                          |                                                                                                                                                                                                                                                                                                                                                                                                                                                                                                |
| 3a. Drug is part of a fixed-dose combination                                                                                                                                                                                                                                                                                                                                                                                                                                                                             | <input type="checkbox"/> Yes <input type="checkbox"/> No                                                                                                                                                                                                                                                                                                                                                                                                                                                                                                                                                                                                                                                                                                                                                                                                                                                                                                                                                                                                                                                                    |                                                                                                                                                                                                                                                                                                                                                                                                                                                                                                                          |                                                                                                                                                                                                                                                                                                                                                                                                                                                                                                |
| 3b. How many times a day is this medication prescribed?                                                                                                                                                                                                                                                                                                                                                                                                                                                                  | _ _ _ _                                                                                                                                                                                                                                                                                                                                                                                                                                                                                                                                                                                                                                                                                                                                                                                                                                                                                                                                                                                                                                                                                                                     |                                                                                                                                                                                                                                                                                                                                                                                                                                                                                                                          |                                                                                                                                                                                                                                                                                                                                                                                                                                                                                                |
| 3c. How many days a week is this medication prescribed?                                                                                                                                                                                                                                                                                                                                                                                                                                                                  | _ _ _ _                                                                                                                                                                                                                                                                                                                                                                                                                                                                                                                                                                                                                                                                                                                                                                                                                                                                                                                                                                                                                                                                                                                     |                                                                                                                                                                                                                                                                                                                                                                                                                                                                                                                          |                                                                                                                                                                                                                                                                                                                                                                                                                                                                                                |
| 3d. Start Date                                                                                                                                                                                                                                                                                                                                                                                                                                                                                                           | _ _ _ / _ _ _ / _ _ _ _ _  (dd/mm/yyyy)<br><input type="checkbox"/> Unknown                                                                                                                                                                                                                                                                                                                                                                                                                                                                                                                                                                                                                                                                                                                                                                                                                                                                                                                                                                                                                                                 |                                                                                                                                                                                                                                                                                                                                                                                                                                                                                                                          |                                                                                                                                                                                                                                                                                                                                                                                                                                                                                                |
| 3e. Stop Date                                                                                                                                                                                                                                                                                                                                                                                                                                                                                                            | _ _ _ / _ _ _ / _ _ _ _ _  (dd/mm/yyyy)<br><input type="checkbox"/> Ongoing (Return to update stop date if changed)<br><input type="checkbox"/> Unknown                                                                                                                                                                                                                                                                                                                                                                                                                                                                                                                                                                                                                                                                                                                                                                                                                                                                                                                                                                     |                                                                                                                                                                                                                                                                                                                                                                                                                                                                                                                          |                                                                                                                                                                                                                                                                                                                                                                                                                                                                                                |
| 3f. Reason for change or interruption                                                                                                                                                                                                                                                                                                                                                                                                                                                                                    | <input type="checkbox"/> Drug resistance<br><input type="checkbox"/> Drug interaction<br><input type="checkbox"/> Pregnancy<br><input type="checkbox"/> Side effects or toxicity<br><input type="checkbox"/> Compatibility with TB drugs<br><input type="checkbox"/> Participant stopped taking meds<br><input type="checkbox"/> Lost to follow up<br><input type="checkbox"/> Death<br><input type="checkbox"/> Participant removed from study<br><input type="checkbox"/> Other _____<br><input type="checkbox"/> Unknown                                                                                                                                                                                                                                                                                                                                                                                                                                                                                                                                                                                                 |                                                                                                                                                                                                                                                                                                                                                                                                                                                                                                                          |                                                                                                                                                                                                                                                                                                                                                                                                                                                                                                |

ID Number \_\_\_\_\_

ART Page 3 of 8 v1.0 26Jul2022

## IeDEA TB SRN

| HIV Drug 4                                              |                                                                                                                                                                                                                                                                                                                                                                                                                                                                                                                                                                                                                                                                                                                                                                                                                                                                                                                                                                                          |
|---------------------------------------------------------|------------------------------------------------------------------------------------------------------------------------------------------------------------------------------------------------------------------------------------------------------------------------------------------------------------------------------------------------------------------------------------------------------------------------------------------------------------------------------------------------------------------------------------------------------------------------------------------------------------------------------------------------------------------------------------------------------------------------------------------------------------------------------------------------------------------------------------------------------------------------------------------------------------------------------------------------------------------------------------------|
| 4. ARV 4<br>(Select one)                                | <input type="checkbox"/> abacavir (ABC) <input type="checkbox"/> maraviroc (MVC)<br><input type="checkbox"/> atazanavir (ATV) <input type="checkbox"/> nevirapine (NVP)<br><input type="checkbox"/> darunavir (DRV) <input type="checkbox"/> raltegravir (RAL)<br><input type="checkbox"/> didanosine (ddI) <input type="checkbox"/> ritonavir (RTV)<br><input type="checkbox"/> dolutegravir (DTG) <input type="checkbox"/> stavudine (d4T)<br><input type="checkbox"/> efavirenz (EFV) <input type="checkbox"/> tenofovir alafenamide (TAF)<br><input type="checkbox"/> enfuvirtide (ENF) <input type="checkbox"/> tenofovir disoproxil fumarate (TDF)<br><input type="checkbox"/> emtricitabine (FTC) <input type="checkbox"/> tipranavir (TPV)<br><input type="checkbox"/> etravirine (ETR) <input type="checkbox"/> zidovudine (AZT/ZDV)<br><input type="checkbox"/> lamivudine (3TC)<br><input type="checkbox"/> lopinavir/ritonavir (LPV/r) <input type="checkbox"/> Other: _____ |
| 4a. Drug is part of a fixed-dose combination            | <input type="checkbox"/> Yes <input type="checkbox"/> No                                                                                                                                                                                                                                                                                                                                                                                                                                                                                                                                                                                                                                                                                                                                                                                                                                                                                                                                 |
| 4b. How many times a day is this medication prescribed? | _ _ _                                                                                                                                                                                                                                                                                                                                                                                                                                                                                                                                                                                                                                                                                                                                                                                                                                                                                                                                                                                    |
| 4c. How many days a week is this medication prescribed? | _ _ _                                                                                                                                                                                                                                                                                                                                                                                                                                                                                                                                                                                                                                                                                                                                                                                                                                                                                                                                                                                    |
| 4d. Start Date                                          | _ _ / _ _ / _ _ _ _  (dd/mm/yyyy)<br><input type="checkbox"/> Unknown                                                                                                                                                                                                                                                                                                                                                                                                                                                                                                                                                                                                                                                                                                                                                                                                                                                                                                                    |
| 4e. Stop Date                                           | _ _ / _ _ / _ _ _ _  (dd/mm/yyyy)<br><input type="checkbox"/> Ongoing (Return to update stop date if changed)<br><input type="checkbox"/> Unknown                                                                                                                                                                                                                                                                                                                                                                                                                                                                                                                                                                                                                                                                                                                                                                                                                                        |
| 4f. Reason for change or interruption                   | <input type="checkbox"/> Drug resistance<br><input type="checkbox"/> Drug interaction<br><input type="checkbox"/> Pregnancy<br><input type="checkbox"/> Side effects or toxicity<br><input type="checkbox"/> Compatibility with TB drugs<br><input type="checkbox"/> Participant stopped taking meds<br><input type="checkbox"/> Lost to follow up<br><input type="checkbox"/> Death<br><input type="checkbox"/> Participant removed from study<br><input type="checkbox"/> Other _____<br><input type="checkbox"/> Unknown                                                                                                                                                                                                                                                                                                                                                                                                                                                              |

ID Number \_\_\_\_\_

ART Page 4 of 8 v1.0 26Jul2022

## IeDEA TB SRN

| HIV Drug 5                                              |                                                                                                                                                                                                                                                                                                                                                                                                                                                                                                                                                                                                                                                                                                                                                                                                                                                                                                                                                                                             |
|---------------------------------------------------------|---------------------------------------------------------------------------------------------------------------------------------------------------------------------------------------------------------------------------------------------------------------------------------------------------------------------------------------------------------------------------------------------------------------------------------------------------------------------------------------------------------------------------------------------------------------------------------------------------------------------------------------------------------------------------------------------------------------------------------------------------------------------------------------------------------------------------------------------------------------------------------------------------------------------------------------------------------------------------------------------|
| 5. ARV 5<br>(Select one)                                | <input type="checkbox"/> abacavir (ABC) <input type="checkbox"/> maraviroc (MVC)<br><input type="checkbox"/> atazanavir (ATV) <input type="checkbox"/> nevirapine (NVP)<br><input type="checkbox"/> darunavir (DRV) <input type="checkbox"/> raltegravir (RAL)<br><input type="checkbox"/> didanosine (ddI) <input type="checkbox"/> ritonavir (RTV)<br><input type="checkbox"/> dolutegravir (DTG) <input type="checkbox"/> stavudine (d4T)<br><input type="checkbox"/> efavirenz (EFV) <input type="checkbox"/> tenofovir alafenamide (TAF)<br><input type="checkbox"/> enfuvirtide (ENF) <input type="checkbox"/> tenofovir disoproxil fumarate (TDF)<br><input type="checkbox"/> emtricitabine (FTC) <input type="checkbox"/> tipranavir (TPV)<br><input type="checkbox"/> etravirine (ETR) <input type="checkbox"/> zidovudine (AZT/ZDV)<br><input type="checkbox"/> lamivudine (3TC)<br><input type="checkbox"/> lopinavir/ritonavir (LPV/r)<br><input type="checkbox"/> Other: _____ |
| 5a. Drug is part of a fixed-dose combination            | <input type="checkbox"/> Yes <input type="checkbox"/> No                                                                                                                                                                                                                                                                                                                                                                                                                                                                                                                                                                                                                                                                                                                                                                                                                                                                                                                                    |
| 5b. How many times a day is this medication prescribed? | _ _ _                                                                                                                                                                                                                                                                                                                                                                                                                                                                                                                                                                                                                                                                                                                                                                                                                                                                                                                                                                                       |
| 5c. How many days a week is this medication prescribed? | _ _ _                                                                                                                                                                                                                                                                                                                                                                                                                                                                                                                                                                                                                                                                                                                                                                                                                                                                                                                                                                                       |
| 5d. Start Date                                          | _ _ / _ _ / _ _ _ _  (dd/mm/yyyy)<br><input type="checkbox"/> Unknown                                                                                                                                                                                                                                                                                                                                                                                                                                                                                                                                                                                                                                                                                                                                                                                                                                                                                                                       |
| 5e. Stop Date                                           | _ _ / _ _ / _ _ _ _  (dd/mm/yyyy)<br><input type="checkbox"/> Ongoing (Return to update stop date if changed)<br><input type="checkbox"/> Unknown                                                                                                                                                                                                                                                                                                                                                                                                                                                                                                                                                                                                                                                                                                                                                                                                                                           |
| 5f. Reason for change or interruption                   | <input type="checkbox"/> Drug resistance<br><input type="checkbox"/> Drug interaction<br><input type="checkbox"/> Pregnancy<br><input type="checkbox"/> Side effects or toxicity<br><input type="checkbox"/> Compatibility with TB drugs<br><input type="checkbox"/> Participant stopped taking meds<br><input type="checkbox"/> Lost to follow up<br><input type="checkbox"/> Death<br><input type="checkbox"/> Participant removed from study<br><input type="checkbox"/> Other _____<br><input type="checkbox"/> Unknown                                                                                                                                                                                                                                                                                                                                                                                                                                                                 |

ID Number \_\_\_\_\_

ART Page 5 of 8 v1.0 26Jul2022

## IeDEA TB SRN

| HIV Drug 6                                              |                                                                                                                                                                                                                                                                                                                                                                                                                                                                                                                                                                                                                                                                                                                                                                                                                                                                                                                                                                                             |
|---------------------------------------------------------|---------------------------------------------------------------------------------------------------------------------------------------------------------------------------------------------------------------------------------------------------------------------------------------------------------------------------------------------------------------------------------------------------------------------------------------------------------------------------------------------------------------------------------------------------------------------------------------------------------------------------------------------------------------------------------------------------------------------------------------------------------------------------------------------------------------------------------------------------------------------------------------------------------------------------------------------------------------------------------------------|
| 6. ARV 6<br>(Select one)                                | <input type="checkbox"/> abacavir (ABC) <input type="checkbox"/> maraviroc (MVC)<br><input type="checkbox"/> atazanavir (ATV) <input type="checkbox"/> nevirapine (NVP)<br><input type="checkbox"/> darunavir (DRV) <input type="checkbox"/> raltegravir (RAL)<br><input type="checkbox"/> didanosine (ddI) <input type="checkbox"/> ritonavir (RTV)<br><input type="checkbox"/> dolutegravir (DTG) <input type="checkbox"/> stavudine (d4T)<br><input type="checkbox"/> efavirenz (EFV) <input type="checkbox"/> tenofovir alafenamide (TAF)<br><input type="checkbox"/> enfuvirtide (ENF) <input type="checkbox"/> tenofovir disoproxil fumarate (TDF)<br><input type="checkbox"/> emtricitabine (FTC) <input type="checkbox"/> tipranavir (TPV)<br><input type="checkbox"/> etravirine (ETR) <input type="checkbox"/> zidovudine (AZT/ZDV)<br><input type="checkbox"/> lamivudine (3TC)<br><input type="checkbox"/> lopinavir/ritonavir (LPV/r)<br><input type="checkbox"/> Other: _____ |
| 6a. Drug is part of a fixed-dose combination            | <input type="checkbox"/> Yes <input type="checkbox"/> No                                                                                                                                                                                                                                                                                                                                                                                                                                                                                                                                                                                                                                                                                                                                                                                                                                                                                                                                    |
| 6b. How many times a day is this medication prescribed? | _ _ _                                                                                                                                                                                                                                                                                                                                                                                                                                                                                                                                                                                                                                                                                                                                                                                                                                                                                                                                                                                       |
| 6c. How many days a week is this medication prescribed? | _ _ _                                                                                                                                                                                                                                                                                                                                                                                                                                                                                                                                                                                                                                                                                                                                                                                                                                                                                                                                                                                       |
| 6d. Start Date                                          | _ _ / _ _ / _ _ _ _  (dd/mm/yyyy)<br><input type="checkbox"/> Unknown                                                                                                                                                                                                                                                                                                                                                                                                                                                                                                                                                                                                                                                                                                                                                                                                                                                                                                                       |
| 6e. Stop Date                                           | _ _ / _ _ / _ _ _ _  (dd/mm/yyyy)<br><input type="checkbox"/> Ongoing (Return to update stop date if changed)<br><input type="checkbox"/> Unknown                                                                                                                                                                                                                                                                                                                                                                                                                                                                                                                                                                                                                                                                                                                                                                                                                                           |
| 6f. Reason for change or interruption                   | <input type="checkbox"/> Drug resistance<br><input type="checkbox"/> Drug interaction<br><input type="checkbox"/> Pregnancy<br><input type="checkbox"/> Side effects or toxicity<br><input type="checkbox"/> Compatibility with TB drugs<br><input type="checkbox"/> Participant stopped taking meds<br><input type="checkbox"/> Lost to follow up<br><input type="checkbox"/> Death<br><input type="checkbox"/> Participant removed from study<br><input type="checkbox"/> Other _____<br><input type="checkbox"/> Unknown                                                                                                                                                                                                                                                                                                                                                                                                                                                                 |

ID Number \_\_\_\_\_

ART Page 6 of 8 v1.0 26Jul2022

## IeDEA TB SRN

| HIV Drug 7                                              |                                                                                                                                                                                                                                                                                                                                                                                                                                                                                                                                                                                                                                                                                                                                                                                                                                                                                                                                                                                          |
|---------------------------------------------------------|------------------------------------------------------------------------------------------------------------------------------------------------------------------------------------------------------------------------------------------------------------------------------------------------------------------------------------------------------------------------------------------------------------------------------------------------------------------------------------------------------------------------------------------------------------------------------------------------------------------------------------------------------------------------------------------------------------------------------------------------------------------------------------------------------------------------------------------------------------------------------------------------------------------------------------------------------------------------------------------|
| 7. ARV 7<br>(Select one)                                | <input type="checkbox"/> abacavir (ABC) <input type="checkbox"/> maraviroc (MVC)<br><input type="checkbox"/> atazanavir (ATV) <input type="checkbox"/> nevirapine (NVP)<br><input type="checkbox"/> darunavir (DRV) <input type="checkbox"/> raltegravir (RAL)<br><input type="checkbox"/> didanosine (ddI) <input type="checkbox"/> ritonavir (RTV)<br><input type="checkbox"/> dolutegravir (DTG) <input type="checkbox"/> stavudine (d4T)<br><input type="checkbox"/> efavirenz (EFV) <input type="checkbox"/> tenofovir alafenamide (TAF)<br><input type="checkbox"/> enfuvirtide (ENF) <input type="checkbox"/> tenofovir disoproxil fumarate (TDF)<br><input type="checkbox"/> emtricitabine (FTC) <input type="checkbox"/> tipranavir (TPV)<br><input type="checkbox"/> etravirine (ETR) <input type="checkbox"/> zidovudine (AZT/ZDV)<br><input type="checkbox"/> lamivudine (3TC)<br><input type="checkbox"/> lopinavir/ritonavir (LPV/r) <input type="checkbox"/> Other: _____ |
| 7a. Drug is part of a fixed-dose combination            | <input type="checkbox"/> Yes <input type="checkbox"/> No                                                                                                                                                                                                                                                                                                                                                                                                                                                                                                                                                                                                                                                                                                                                                                                                                                                                                                                                 |
| 7b. How many times a day is this medication prescribed? | _ _ _                                                                                                                                                                                                                                                                                                                                                                                                                                                                                                                                                                                                                                                                                                                                                                                                                                                                                                                                                                                    |
| 7c. How many days a week is this medication prescribed? | _ _ _                                                                                                                                                                                                                                                                                                                                                                                                                                                                                                                                                                                                                                                                                                                                                                                                                                                                                                                                                                                    |
| 7d. Start Date                                          | _ _ / _ _ / _ _ _ _  (dd/mm/yyyy)<br><input type="checkbox"/> Unknown                                                                                                                                                                                                                                                                                                                                                                                                                                                                                                                                                                                                                                                                                                                                                                                                                                                                                                                    |
| 7e. Stop Date                                           | _ _ / _ _ / _ _ _ _  (dd/mm/yyyy)<br><input type="checkbox"/> Ongoing (Return to update stop date if changed)<br><input type="checkbox"/> Unknown                                                                                                                                                                                                                                                                                                                                                                                                                                                                                                                                                                                                                                                                                                                                                                                                                                        |
| 7f. Reason for change or interruption                   | <input type="checkbox"/> Drug resistance<br><input type="checkbox"/> Drug interaction<br><input type="checkbox"/> Pregnancy<br><input type="checkbox"/> Side effects or toxicity<br><input type="checkbox"/> Compatibility with TB drugs<br><input type="checkbox"/> Participant stopped taking meds<br><input type="checkbox"/> Lost to follow up<br><input type="checkbox"/> Death<br><input type="checkbox"/> Participant removed from study<br><input type="checkbox"/> Other _____<br><input type="checkbox"/> Unknown                                                                                                                                                                                                                                                                                                                                                                                                                                                              |

Investigator: \_\_\_\_\_ Signature: \_\_\_\_\_ Date |\_|\_|/|\_|\_|/|\_|\_|\_|\_|

ID Number \_\_\_\_\_

ART Page 7 of 8 v1.0 26Jul2022



## IeDEA TB SRN

**Note – in the case of adolescents younger than age 18:** assess adolescent disclosure status before proceeding. Follow procedures for avoiding accidental disclosure to adolescents.

| [23] ANTIRETROVIRAL TREATMENT ADHERENCE                                                    |                                                                                                                                                                                                                                                                                                                                                                                                                                                                                                                                                                                                                                                                                                                                                                                                                                                                           |
|--------------------------------------------------------------------------------------------|---------------------------------------------------------------------------------------------------------------------------------------------------------------------------------------------------------------------------------------------------------------------------------------------------------------------------------------------------------------------------------------------------------------------------------------------------------------------------------------------------------------------------------------------------------------------------------------------------------------------------------------------------------------------------------------------------------------------------------------------------------------------------------------------------------------------------------------------------------------------------|
| <b>IeDEA/TB SRN ID</b>                                                                     |                                                                                                                                                                                                                                                                                                                                                                                                                                                                                                                                                                                                                                                                                                                                                                                                                                                                           |
| Visit                                                                                      | <input type="checkbox"/> Baseline<br><input type="checkbox"/> Month 1<br><input type="checkbox"/> Month 2<br><input type="checkbox"/> End of Tx<br><input type="checkbox"/> 6-M Post-Tx<br><input type="checkbox"/> 12-M Post-Tx<br><input type="checkbox"/> Tx F/R/W                                                                                                                                                                                                                                                                                                                                                                                                                                                                                                                                                                                                     |
| Visit date (dd/mm/yyyy)                                                                    | _ _ / _ _ / _ _ _ _                                                                                                                                                                                                                                                                                                                                                                                                                                                                                                                                                                                                                                                                                                                                                                                                                                                       |
| <b>Adherence questions</b>                                                                 |                                                                                                                                                                                                                                                                                                                                                                                                                                                                                                                                                                                                                                                                                                                                                                                                                                                                           |
| 1. Any dose of ART missed in the last 4 days                                               | <input type="checkbox"/> Yes<br><input type="checkbox"/> No<br><input type="checkbox"/> Unknown                                                                                                                                                                                                                                                                                                                                                                                                                                                                                                                                                                                                                                                                                                                                                                           |
| 2. If yes, number of ART doses missed in the last 4 days                                   | _ _                                                                                                                                                                                                                                                                                                                                                                                                                                                                                                                                                                                                                                                                                                                                                                                                                                                                       |
| 3. Any dose of ART missed in the last 30 days?                                             | <input type="checkbox"/> Yes<br><input type="checkbox"/> No<br><input type="checkbox"/> Unknown                                                                                                                                                                                                                                                                                                                                                                                                                                                                                                                                                                                                                                                                                                                                                                           |
| <b>Pill count for ART drugs</b>                                                            |                                                                                                                                                                                                                                                                                                                                                                                                                                                                                                                                                                                                                                                                                                                                                                                                                                                                           |
| 4. Date of last ART refill (dd/mm/yyyy)                                                    | _ _ / _ _ / _ _ _ _  <input type="checkbox"/> Unknown                                                                                                                                                                                                                                                                                                                                                                                                                                                                                                                                                                                                                                                                                                                                                                                                                     |
| 5. Expected number of tablets taken daily for ART since last refill                        | _ _  <input type="checkbox"/> Unknown                                                                                                                                                                                                                                                                                                                                                                                                                                                                                                                                                                                                                                                                                                                                                                                                                                     |
| 6. Number of tablets at last refill (tablets given + tablets patient already had)          | _ _ _  <input type="checkbox"/> Unknown                                                                                                                                                                                                                                                                                                                                                                                                                                                                                                                                                                                                                                                                                                                                                                                                                                   |
| 7. Number of tablets brought back                                                          | _ _ _  <input type="checkbox"/> Unknown                                                                                                                                                                                                                                                                                                                                                                                                                                                                                                                                                                                                                                                                                                                                                                                                                                   |
| 8. Description of any adherence challenges for ART regimen ( <i>Check all that apply</i> ) | <input type="checkbox"/> Forgetting dose(s)<br><input type="checkbox"/> Difficulty tolerating medication(s) / side effects<br><input type="checkbox"/> Unable to take medication(s) while feeling ill or unwell<br><input type="checkbox"/> Unable to take medication(s) due to not having food<br><input type="checkbox"/> Did not have privacy / unable to take medication(s) while around others<br><input type="checkbox"/> Not willing to take medication(s)<br><input type="checkbox"/> Did not have medication(s) with me at the time for dose<br><input type="checkbox"/> Did not have a sufficient supply of medication(s)<br><input type="checkbox"/> Medication(s) have not been available from pharmacy (e.g., stock-out)<br><input type="checkbox"/> Other (specify) _____<br><input type="checkbox"/> Unknown<br><input type="checkbox"/> Decline to answer |

Investigator: \_\_\_\_\_ Signature: \_\_\_\_\_ Date: |\_|\_|/|\_|\_|/|\_|\_|\_|\_|

ID Number: \_\_\_\_\_  
v1.0 26Jul2022

ART Adherence Page 1 of 1

**leDEA TB SRN**

| [24] OTHER RESEARCH                                                                                                   |                                                                                                 |
|-----------------------------------------------------------------------------------------------------------------------|-------------------------------------------------------------------------------------------------|
| <b>leDEA/TB SRN ID</b>                                                                                                |                                                                                                 |
| Type of visit                                                                                                         | <input type="checkbox"/> Baseline                                                               |
| Visit date (dd/mm/yyyy)                                                                                               | _ _ / _ _ / _ _ _ _                                                                             |
| Complete only for participants enrolled in other research:                                                            |                                                                                                 |
| 1. Name or short description of the other study                                                                       | .....<br>.....<br>.....                                                                         |
| 2. Does the other research include a medical intervention?                                                            | <input type="checkbox"/> Yes<br><input type="checkbox"/> No<br><input type="checkbox"/> Unknown |
| 2a. If yes, specify medical interventions in each research study for which the individual is co-enrolled.             | .....<br>.....<br>.....<br>.....                                                                |
| 3. Does the other research include a care support intervention?                                                       | <input type="checkbox"/> Yes<br><input type="checkbox"/> No<br><input type="checkbox"/> Unknown |
| 3a. If yes, specify care support interventions in each research study for which the individual is co-enrolled.        | .....<br>.....<br>.....<br>.....                                                                |
| 4. Any other support or service provided by the other research?                                                       | <input type="checkbox"/> Yes<br><input type="checkbox"/> No<br><input type="checkbox"/> Unknown |
| 4a. If yes, specify other support or service provided in each research study for which the individual is co-enrolled. | .....<br>.....<br>.....<br>.....                                                                |

Investigator: \_\_\_\_\_ Signature: \_\_\_\_\_ Date |\_|\_|/|\_|\_|/|\_|\_|\_|\_|

ID Number \_\_\_\_\_  
v1.0 26Jul2022

Other Research Page 1 of 1

## IeDEA TB SRN

| <b>[25] Adverse Event Form</b>                                  |                                                                                                                                                                                                                                              |
|-----------------------------------------------------------------|----------------------------------------------------------------------------------------------------------------------------------------------------------------------------------------------------------------------------------------------|
| Complete one form for each adverse event (AE)                   |                                                                                                                                                                                                                                              |
| <b>IeDEA/TB SRN ID</b>                                          |                                                                                                                                                                                                                                              |
| Visit                                                           | <input type="checkbox"/> Month 1<br><input type="checkbox"/> Month 2<br><input type="checkbox"/> End of Tx<br><input type="checkbox"/> Tx F/R/W                                                                                              |
| 1. Has an Adverse Event been noted for this participant?        | <input type="checkbox"/> Yes (if yes, fill below) <input type="checkbox"/> No <input type="checkbox"/> Unknown                                                                                                                               |
| 2. Form completion date                                         | _ _ / _ _ / _ _ _ _  (dd/mm/yyyy)                                                                                                                                                                                                            |
| 3. Event brief description (signs, symptoms, syndrome)          |                                                                                                                                                                                                                                              |
| 4. Start date (dd/mm/yyyy)                                      | _ _ / _ _ / _ _ _ _                                                                                                                                                                                                                          |
| 5. Resolved                                                     | <input type="checkbox"/> Yes <input type="checkbox"/> No, ongoing <input type="checkbox"/> No, deceased or lost-to-follow up before resolution                                                                                               |
| 5a. If yes, end date / resolution (dd/mm/yyyy)                  | _ _ / _ _ / _ _ _ _                                                                                                                                                                                                                          |
| 6. Type of AE (check all that apply)                            | <input type="checkbox"/> Dermatologic system (e.g., rash)<br><input type="checkbox"/> Hepatic system (e.g., Drug Induced Liver Injury)<br><input type="checkbox"/> Nervous system<br><input type="checkbox"/> Other: _____                   |
| 7. Summary of this AE                                           |                                                                                                                                                                                                                                              |
| 8. Severity grading (DAIDS)                                     | <input type="checkbox"/> 1 (mild)<br><input type="checkbox"/> 2 (moderate)<br><input type="checkbox"/> 3 (severe)<br><input type="checkbox"/> 4 (life-threatening)                                                                           |
| 9. Adverse drug reaction related to TB Tx                       | <input type="checkbox"/> Related / Defined <input type="checkbox"/> Unlikely / Doubtful<br><input type="checkbox"/> Likely <input type="checkbox"/> Not related<br><input type="checkbox"/> Possible <input type="checkbox"/> Not applicable |
| 10. Adverse drug reaction related to ARVs (if positive for HIV) | <input type="checkbox"/> Related / Defined <input type="checkbox"/> Unlikely / Doubtful<br><input type="checkbox"/> Likely <input type="checkbox"/> Not related<br><input type="checkbox"/> Possible <input type="checkbox"/> Not applicable |
| 11. Final diagnosis                                             |                                                                                                                                                                                                                                              |
| Notes (optional)                                                |                                                                                                                                                                                                                                              |

Investigator: \_\_\_\_\_ Signature: \_\_\_\_\_ Date |\_|\_|/|\_|\_|/|\_|\_|\_|\_|

ID Number \_\_\_\_\_  
v1.0 26Jul2022

AE Page 1 of 1

## leDEA TB SRN

| [26] TB IRIS                                                                                                                              |                                                                                                                                                                                                                                    |
|-------------------------------------------------------------------------------------------------------------------------------------------|------------------------------------------------------------------------------------------------------------------------------------------------------------------------------------------------------------------------------------|
| <b>leDEA/TB SRN ID</b>                                                                                                                    |                                                                                                                                                                                                                                    |
| Visit                                                                                                                                     | <input type="checkbox"/> Month 1<br><input type="checkbox"/> Month 2                                                                                                                                                               |
| Form completion date<br>(dd/mm/yyyy)                                                                                                      | _ _ / _ _ / _ _ _ _                                                                                                                                                                                                                |
| <b>IRIS/paradoxical reaction</b>                                                                                                          |                                                                                                                                                                                                                                    |
| 1. Suspicion of IRIS/paradoxical reaction ( <i>New/worsened lymphadenopathy, or respiratory, abdominal, or neurological TB symptoms</i> ) | <input type="checkbox"/> Yes (if yes, fill IRIS section below)<br><input type="checkbox"/> No (END of form)                                                                                                                        |
| 2. Date of IRIS suspicion<br>(dd/mm/yyyy)                                                                                                 | _ _ / _ _ / _ _ _ _                                                                                                                                                                                                                |
| 3. Fever (as of date of IRIS suspicion)                                                                                                   | <input type="checkbox"/> Yes new (since previous visit)<br><input type="checkbox"/> Yes worsened (from previous visit)<br><input type="checkbox"/> Yes unchanged (from previous visit)<br><input type="checkbox"/> No              |
| 4. Peripheral lymphadenopathies (as of date of IRIS suspicion)                                                                            | <input type="checkbox"/> Yes new (since previous visit)<br><input type="checkbox"/> Yes worsened (from previous visit)<br><input type="checkbox"/> Yes unchanged (from previous visit)<br><input type="checkbox"/> No (SKIP to #5) |
| 4a. If yes, clinical aspect<br>( <i>Check one</i> )                                                                                       | <input type="checkbox"/> Swollen<br><input type="checkbox"/> Inflammatory<br><input type="checkbox"/> Suppurative<br><input type="checkbox"/> Necrotic                                                                             |
| 4b. If yes, location<br>( <i>Check all that apply</i> )                                                                                   | <input type="checkbox"/> Cervical<br><input type="checkbox"/> Axillary<br><input type="checkbox"/> Inguinal<br><input type="checkbox"/> Other                                                                                      |
| 5. Abdominal pain<br>( <i>as of date of IRIS suspicion</i> )                                                                              | <input type="checkbox"/> Yes new (since previous visit)<br><input type="checkbox"/> Yes worsened (from previous visit)<br><input type="checkbox"/> Yes unchanged (from previous visit)<br><input type="checkbox"/> No              |
| 6. Central nervous system disorders<br>( <i>as of date of IRIS suspicion</i> )                                                            | <input type="checkbox"/> Yes new (since previous visit)<br><input type="checkbox"/> Yes worsened (from previous visit)<br><input type="checkbox"/> Yes unchanged (from previous visit)<br><input type="checkbox"/> No (SKIP to #7) |
| 6a. If yes, type of symptoms                                                                                                              | <input type="checkbox"/> Coma<br><input type="checkbox"/> Meningitis<br><input type="checkbox"/> Hemiplegia                                                                                                                        |

ID Number: \_\_\_\_\_  
v1.0 26Jul2022

TB IRIS Page 1 of 2

|                                                                                                 |                                                                                                                                                                                                                                                                                                                                |
|-------------------------------------------------------------------------------------------------|--------------------------------------------------------------------------------------------------------------------------------------------------------------------------------------------------------------------------------------------------------------------------------------------------------------------------------|
|                                                                                                 | <input type="checkbox"/> Hemiparesis<br><input type="checkbox"/> Other: .....                                                                                                                                                                                                                                                  |
| 7. Respiratory symptoms (e.g., cough, dyspnea, stridor) ( <i>as of date of IRIS suspicion</i> ) | <input type="checkbox"/> Yes new (since previous visit)<br><input type="checkbox"/> Yes worsened (from previous visit)<br><input type="checkbox"/> Yes unchanged (from previous visit)<br><input type="checkbox"/> No                                                                                                          |
| 8. Chest X-ray abnormalities ( <i>If chest x-ray done, fill <b>CXR Form</b></i> )               | <input type="checkbox"/> Yes new (since previous visit)<br><input type="checkbox"/> Yes worsened (from previous visit)<br><input type="checkbox"/> Yes unchanged (from previous visit)<br><input type="checkbox"/> No<br><input type="checkbox"/> CXR not performed                                                            |
| 9. Abdominal Ultrasound abnormalities                                                           | <input type="checkbox"/> Yes<br><input type="checkbox"/> No<br><input type="checkbox"/> Ultrasound not performed (SKIP to #10)                                                                                                                                                                                                 |
| 9a. Date of abdominal ultrasound ( <i>dd/mm/yyyy</i> )                                          | _ _ / _ _ / _ _ _ _                                                                                                                                                                                                                                                                                                            |
| 9b. If yes to abnormalities, abdominal ultrasound findings ( <i>Check all that apply</i> )      | <input type="checkbox"/> Abdominal adenopathy<br><input type="checkbox"/> Pleural effusion<br><input type="checkbox"/> Peritoneal effusion<br><input type="checkbox"/> Other .....                                                                                                                                             |
| 10. CT scan abnormalities                                                                       | <input type="checkbox"/> Yes<br><input type="checkbox"/> No<br><input type="checkbox"/> CT scan not performed (SKIP to #11)                                                                                                                                                                                                    |
| 10a. Type of CT scan ( <i>Check all that apply</i> )                                            | <input type="checkbox"/> Abdominal<br><input type="checkbox"/> Cerebral<br><input type="checkbox"/> Thoracic                                                                                                                                                                                                                   |
| 10b. Date of CT scan ( <i>dd/mm/yyyy</i> )                                                      | _ _ / _ _ / _ _ _ _                                                                                                                                                                                                                                                                                                            |
| 10c. If yes to abnormalities, CT abnormalities ( <i>Check all that apply</i> )                  | <input type="checkbox"/> Abdominal adenopathy<br><input type="checkbox"/> Mediastinal adenopathy<br><input type="checkbox"/> Pulmonary infiltrates<br><input type="checkbox"/> Pleural effusion<br><input type="checkbox"/> Peritoneal effusion<br><input type="checkbox"/> Brain mass<br><input type="checkbox"/> Other ..... |
| 11. Treatment for IRIS initiated                                                                | <input type="checkbox"/> NSAID<br><input type="checkbox"/> Steroids<br><input type="checkbox"/> None                                                                                                                                                                                                                           |
| 12. Date of initiation of treatment for IRIS ( <i>dd/mm/yyyy</i> )                              | _ _ / _ _ / _ _ _ _                                                                                                                                                                                                                                                                                                            |

Investigator: \_\_\_\_\_ Signature: \_\_\_\_\_ Date |\_|\_|/|\_|\_|/|\_|\_|\_|\_|

ID Number: \_\_\_\_\_  
v1.0 26Jul2022

TB IRIS Page 2 of 2

## IeDEA TB SRN

| [27] TREATMENT OUTCOMES                                                                                     |                                                                                                                                                                                                                                                                                                                                                                                                                                                                                                              |
|-------------------------------------------------------------------------------------------------------------|--------------------------------------------------------------------------------------------------------------------------------------------------------------------------------------------------------------------------------------------------------------------------------------------------------------------------------------------------------------------------------------------------------------------------------------------------------------------------------------------------------------|
| IeDEA/TB SRN ID                                                                                             |                                                                                                                                                                                                                                                                                                                                                                                                                                                                                                              |
| Visit                                                                                                       | <input type="checkbox"/> End of Tx<br><input type="checkbox"/> Tx F/R/W                                                                                                                                                                                                                                                                                                                                                                                                                                      |
| <b>TB treatment outcome</b>                                                                                 |                                                                                                                                                                                                                                                                                                                                                                                                                                                                                                              |
| 1. Duration of intensive phase<br>(Report dates and Tx received in TB Tx form)                              | <input type="checkbox"/> 2 months (standard intensive phase for DS-TB)<br><input type="checkbox"/> Other duration, specify:<br> _ _ _ . _ _  months                                                                                                                                                                                                                                                                                                                                                          |
| 2. Duration of maintenance phase<br>(Report dates and Tx received in TB Tx form)                            | <input type="checkbox"/> 4 months (standard maintenance phase for DS-TB)<br><input type="checkbox"/> Other duration, specify:<br> _ _ _ . _ _  months                                                                                                                                                                                                                                                                                                                                                        |
| 3. Suspicion of treatment failure                                                                           | <input type="checkbox"/> Yes → Complete <b>Tx F/R/W Visit</b> (and associated forms)<br><input type="checkbox"/> No (SKIP TO #7)                                                                                                                                                                                                                                                                                                                                                                             |
| 4. Date of clinical suspicion<br>(dd/mm/yyyy; as documented in TB clinic record)                            | _ _ _ / _ _ _ / _ _ _ _ _                                                                                                                                                                                                                                                                                                                                                                                                                                                                                    |
| 5. Additional microbiological testing requested by clinician                                                | <input type="checkbox"/> Yes (report results in <b>TB Microbiology</b> form)<br><input type="checkbox"/> No                                                                                                                                                                                                                                                                                                                                                                                                  |
| 6. Additional chest X-ray requested                                                                         | <input type="checkbox"/> Yes (report results in <b>Chest X-ray</b> form)<br><input type="checkbox"/> No                                                                                                                                                                                                                                                                                                                                                                                                      |
| <b>TB Tx Outcome at Study Site</b>                                                                          |                                                                                                                                                                                                                                                                                                                                                                                                                                                                                                              |
| 7. TB treatment outcomes<br>(based on WHO/IUATLD definitions)                                               | <input type="checkbox"/> Cured<br><input type="checkbox"/> Treatment completed<br><input type="checkbox"/> Treatment failed<br><input type="checkbox"/> Died (any cause)<br><input type="checkbox"/> Lost to follow-up<br><input type="checkbox"/> Transferred out from study site → Complete <b>Outcome from transfer site, below</b><br><input type="checkbox"/> Not known                                                                                                                                 |
| 8. Date of TB treatment outcome from study site                                                             | _ _ _ / _ _ _ / _ _ _ _ _  (dd/mm/yyyy)                                                                                                                                                                                                                                                                                                                                                                                                                                                                      |
| <b>TB Tx Outcome obtained from transfer site</b>                                                            | <b>ONLY to be completed for participants who transferred out from the study site – outcome based on follow-up with transfer site</b>                                                                                                                                                                                                                                                                                                                                                                         |
| 9. Name of site where transferred out                                                                       | .....                                                                                                                                                                                                                                                                                                                                                                                                                                                                                                        |
| 10. Outcome of treatment after transfer-out (reported by outside facility; based on WHO/IUATLD definitions) | <input type="checkbox"/> Never in care at other site / did not complete transfer<br><input type="checkbox"/> Unable to obtain outcome from other site<br><input type="checkbox"/> Cured<br><input type="checkbox"/> Treatment completed<br><input type="checkbox"/> Treatment failed<br><input type="checkbox"/> Died (any cause)<br><input type="checkbox"/> Lost to follow-up<br><input type="checkbox"/> Transferred out to additional site<br><input type="checkbox"/> Not known (unknown to other site) |
| 11. Date of outcome after transfer                                                                          | _ _ _ / _ _ _ / _ _ _ _ _  (dd/mm/yyyy)                                                                                                                                                                                                                                                                                                                                                                                                                                                                      |

Investigator: \_\_\_\_\_ Signature: \_\_\_\_\_ Date |\_|\_|/|\_|\_|/|\_|\_|\_|\_|

ID Number \_\_\_\_\_

TX Outcome Page 1 of 1 v1.0 26Jul2022

## leDEA TB SRN

| [28] DEATH                                                                                                                  |                                                                                                                                                                                                                                                   |
|-----------------------------------------------------------------------------------------------------------------------------|---------------------------------------------------------------------------------------------------------------------------------------------------------------------------------------------------------------------------------------------------|
| <b>leDEA/TB SRN ID</b>                                                                                                      |                                                                                                                                                                                                                                                   |
| 1. Date of death ( <i>dd/mm/yyyy</i> )                                                                                      | _ _  /  _ _  /  _ _ _ _                                                                                                                                                                                                                           |
| 2. Place of death                                                                                                           | <input type="checkbox"/> Home<br><input type="checkbox"/> Hospital<br><input type="checkbox"/> Other, specify .....<br><input type="checkbox"/> Unknown                                                                                           |
| 3. Sudden death                                                                                                             | <input type="checkbox"/> Yes<br><input type="checkbox"/> No<br><input type="checkbox"/> Unknown                                                                                                                                                   |
| 4. Death unexpected                                                                                                         | <input type="checkbox"/> Yes<br><input type="checkbox"/> No<br><input type="checkbox"/> Unknown                                                                                                                                                   |
| 5. Brief narrative description of the sequence of events leading to death (please include means of diagnosis of illnesses): | .....<br>.....<br>.....<br>.....<br>.....<br>.....<br>.....                                                                                                                                                                                       |
| <b>Cause of death (Summary of the causal relation between the conditions leading to death)</b>                              |                                                                                                                                                                                                                                                   |
| 6. Condition that directly caused death (immediate cause):                                                                  | .....                                                                                                                                                                                                                                             |
| 6a. Due to or as a consequence of                                                                                           | .....                                                                                                                                                                                                                                             |
| 6b. Due to or as a consequence of                                                                                           | .....                                                                                                                                                                                                                                             |
| 7. Condition that initiated the train of morbid events (the underlying condition)                                           | .....                                                                                                                                                                                                                                             |
| 8. Death considered to be related to TB as a contributing factor to the death                                               | <input type="checkbox"/> Related/Defined<br><input type="checkbox"/> Likely<br><input type="checkbox"/> Possible<br><input type="checkbox"/> Unlikely/Doubtful<br><input type="checkbox"/> Not related<br><input type="checkbox"/> Not applicable |
| 9. Death considered to be related to a medical treatment                                                                    | <input type="checkbox"/> Related/Defined<br><input type="checkbox"/> Likely<br><input type="checkbox"/> Possible<br><input type="checkbox"/> Unlikely/Doubtful<br><input type="checkbox"/> Not related<br><input type="checkbox"/> Not applicable |

|                                                                                       |                                                                                                                                                                                                                                                                                                                                                                   |
|---------------------------------------------------------------------------------------|-------------------------------------------------------------------------------------------------------------------------------------------------------------------------------------------------------------------------------------------------------------------------------------------------------------------------------------------------------------------|
| 9a. If yes, suspicion of relation to                                                  | <input type="checkbox"/> Antiretroviral treatment<br><input type="checkbox"/> Antituberculosis treatment<br><input type="checkbox"/> Other medical treatment, specify.....                                                                                                                                                                                        |
| 9b. Brief narrative of the suspected association including the name of the medication | .....<br>.....<br>.....                                                                                                                                                                                                                                                                                                                                           |
| 10. Information on circumstance of death collected from<br>(Check all that apply)     | <input type="checkbox"/> Family member<br><input type="checkbox"/> Clinician<br><input type="checkbox"/> Hospital medical record<br><input type="checkbox"/> Outpatient medical record<br><input type="checkbox"/> Death register<br><input type="checkbox"/> Autopsy report<br><input type="checkbox"/> Other, specify .....<br><input type="checkbox"/> Unknown |
| 11. Date death reported to/known to study<br>(dd/mm/yyyy)                             | _ _  /  _ _  /  _ _ _ _                                                                                                                                                                                                                                                                                                                                           |
| 12. Notes (optional)                                                                  | .....<br>.....<br>.....<br>.....<br>.....<br>.....                                                                                                                                                                                                                                                                                                                |

Investigator: \_\_\_\_\_ Signature: \_\_\_\_\_ Date |\_|\_| / |\_|\_| / |\_|\_|\_|\_|

ID Number \_\_\_\_\_  
v1.0 26Jul2022

Death Page 2 of 2



## leDEA/TB SRN Form Event Grid

| Form                                                                                                           | Treatment Phase |          |                        |                         | Follow-up Phase             |                               |                                |         |
|----------------------------------------------------------------------------------------------------------------|-----------------|----------|------------------------|-------------------------|-----------------------------|-------------------------------|--------------------------------|---------|
|                                                                                                                | SCREENING       | BASELINE | MONTH 1<br>(Weeks 3-7) | MONTH 2<br>(Weeks 8-12) | End of TX<br>(-4 to +6 wks) | 6-M POST-TX<br>(-4 to +6 wks) | 12-M POST-TX<br>(-4 to +6 wks) | TX F/RW |
| Informed consent form <sup>a</sup>                                                                             | X               |          |                        |                         |                             |                               |                                |         |
| Assent form (if applicable)                                                                                    | X               |          |                        |                         |                             |                               |                                |         |
| 1. Inclusion (eligibility assessment)                                                                          |                 | X        |                        |                         |                             |                               |                                |         |
| 2. Demographics                                                                                                |                 | X        |                        |                         |                             |                               |                                |         |
| 3. Adolescent and young adult characteristics <sup>b</sup> (if applicable)                                     |                 | X        |                        |                         |                             |                               |                                |         |
| 4. TB history and current diagnosis                                                                            |                 | X        |                        |                         |                             |                               |                                | X       |
| 5. Medical history                                                                                             |                 | X        |                        |                         |                             |                               |                                |         |
| 6. HIV history <sup>c</sup>                                                                                    |                 | X        |                        |                         |                             |                               |                                |         |
| 7. Pregnancy and post-partum history <sup>d</sup> (female participants only)                                   |                 | X        |                        |                         | X                           | X                             | X                              | X       |
| 8. Pregnancy and Infant outcomes (multiple copies, flowsheet, if applicable)                                   |                 | X        |                        |                         | X                           | X                             | X                              | X       |
| 9. Visit and clinical evaluation                                                                               |                 | X        | X                      | X                       | X                           | X                             | X                              | X       |
| 10. ASSIST                                                                                                     |                 | X        |                        |                         | X                           |                               | X                              | X       |
| 11. Additional smoking history                                                                                 |                 | X        |                        |                         | X                           |                               | X                              | X       |
| 12. SGRQ                                                                                                       |                 | X        |                        |                         | X                           | X                             | X                              | X       |
| 13. PHQ-9                                                                                                      |                 | X        |                        |                         | X                           |                               | X                              | X       |
| 14. Spirometry                                                                                                 |                 |          |                        | X                       | X                           | X                             |                                |         |
| 15. 1-minute sit-to-stand test <sup>e</sup>                                                                    |                 | X        |                        | X                       | X                           | X                             | X                              |         |
| 16. TB microbiology <sup>f</sup>                                                                               |                 | X        | X                      | X                       | X                           |                               |                                | X       |
| 17. Other labs <sup>f,g,h,i</sup>                                                                              |                 | X        | X                      | X                       | X                           | X                             | X                              | X       |
| 18. Chest x-ray results <sup>j</sup> (baseline and End of TX for study. Other forms are data collection only.) |                 | X        | X                      | X                       | X                           | X                             | X                              | X       |
| 19. TB treatment (flowsheet)                                                                                   |                 | X        | X                      | X                       | X                           |                               |                                | X       |
| 20. TB treatment adherence                                                                                     |                 |          | X                      | X                       | X                           |                               |                                | X       |
| 21. TB directly observed therapy                                                                               |                 |          | X                      | X                       | X                           |                               |                                | X       |
| 22. Antiretroviral treatment <sup>c</sup> (flowsheet)                                                          |                 | X        | X                      | X                       | X                           | X                             | X                              | X       |
| 23. ART adherence <sup>c</sup>                                                                                 |                 | X        | X                      | X                       | X                           | X                             | X                              | X       |
| 24. Other research                                                                                             |                 | X        |                        |                         |                             |                               |                                |         |
| 25. Adverse event form (repeatable)                                                                            |                 |          | X                      | X                       | X                           |                               |                                | X       |
| 26. TB IRIS                                                                                                    |                 |          | X                      | X                       |                             |                               |                                |         |
| 27. Treatment outcome                                                                                          |                 |          |                        |                         | X                           |                               |                                | X       |
| 28. Death form <sup>k</sup> (if applicable, once)                                                              |                 |          |                        |                         |                             |                               |                                |         |

Screening and Baseline visits may be combined. Month 1 visit is optional. Tx F/R/W: Treatment Failure, Relapse, or Withdrawal.

<sup>a</sup> Adolescent minors who turn 18 years of age during the study will be re-consented on the first visit after turning age 18.

<sup>b</sup> For all adolescent and young adult participants ages 15-24 on enrollment.

<sup>c</sup> For participants with documented HIV infection.

<sup>d</sup> For all female participants.

<sup>e</sup> Performed if site is participating in the PTLD study aim.

<sup>f</sup> HIV viral load (if applicable), CBC, transaminases, TB testing and microbiology data to be collected if available from routine data and not as part of the study.

<sup>g</sup> HIV testing of participants not known to be positive collected from routine data and not as part of the study.

<sup>h</sup> CD4 count will only be performed on participants who are HIV-positive and who have not had a CD4 count performed in the preceding 3 months.

<sup>i</sup> HbA1C and random blood glucose collected if not available from routine data as part of the study.

<sup>j</sup> Digitized/digitizable CXR at baseline, unless done within 4 weeks prior to the Baseline Visit as part of standard of care. If a CXR is not available at the End of Treatment, it will be obtained as part of the study. CXRs from Month 2 and TX F/R/W Visits will be collected if obtained as part of standard of care. Pregnant women are not required to have a CXR.

<sup>k</sup> To be completed for any participants who die after study enrollment, from any cause.
